# Supplementary material
Source: MDPI journal article supplement (https://www.mdpi.com/2073-4352/8/5/221)
Supplement: s1 [file s1]

Archive with 3 entries (3 files):
- supplementary/comp_I.cif
- supplementary/comp_II.cif
- supplementary/supporting_info.pdf
