# Supplementary material
Source: MDPI journal article supplement (https://www.mdpi.com/2073-4352/8/5/221)
Supplement: s1 [file s1 › supplementary/comp_I.cif]

 
data_I

_vrf_PLAT_375_I
;
RESPONSE: Please see our response to _vrf_PLAT971_I
;

_vrf_PLAT_410_I
;
RESPONSE: Please see our response to _vrf_PLAT971_I
;

_vrf_PLAT_413_I
;
RESPONSE: Please see our response to _vrf_PLAT971_I
;

_vrf_PLAT_415_I
;
RESPONSE: Please see our response to _vrf_PLAT971_I
;

_vrf_PLAT_417_I
;
RESPONSE: Please see our response to _vrf_PLAT971_I
;

_vrf_PLAT_971_I
;
RESPONSE: These alerts arise because of the strongly disorder associated with 
all <i>iso</i>-butoxyethanol molecules in the complex. The atoms were 
attempted to treat disorder, but the treatment brought unstable refinement. 
Hence, the final structural model has residual densities around the 
<i>iso</i>-butoxyethanol molecules. These strongly disorder give alert PLAT976. 
The strongly disorder also lead to short H...H distances (PLAT410, PLAT413, 
PLAT415 and PLAT417) and strange C---O---H geometry (PLAT375). Furthermore, 
the strongly disorder make the crystal quality poor. Therefore, the <i>R</i> 
factor is relatively high, and Alerts PLAT972 might arise.
;

_vrf_PLAT_972_I
;
RESPONSE: Please see our response to _vrf_PLAT971_I
;

_audit_creation_method            'SHELXL-2014/7' 
_shelx_SHELXL_version_number      '2014/7' 


_chemical_name_systematic         ? 
_chemical_name_common             ? 
_chemical_melting_point           ? 
_chemical_formula_moiety          ? 
_chemical_formula_sum 
 'C54 H88 Cd9 N18 O14' 
_chemical_formula_weight          2225.02 
  
loop_ 
 _atom_type_symbol 
 _atom_type_description 
 _atom_type_scat_dispersion_real 
 _atom_type_scat_dispersion_imag 
 _atom_type_scat_source 
 'C'  'C'   0.0033   0.0016 
 'International Tables Vol C Tables 4.2.6.8 and 6.1.1.4' 
 'H'  'H'   0.0000   0.0000 
 'International Tables Vol C Tables 4.2.6.8 and 6.1.1.4' 
 'N'  'N'   0.0061   0.0033 
 'International Tables Vol C Tables 4.2.6.8 and 6.1.1.4' 
 'O'  'O'   0.0106   0.0060 
 'International Tables Vol C Tables 4.2.6.8 and 6.1.1.4' 
 'Cd'  'Cd'  -0.8075   1.2024 
 'International Tables Vol C Tables 4.2.6.8 and 6.1.1.4' 
  
_space_group_crystal_system       monoclinic 
_space_group_IT_number            15 
_space_group_name_H-M_alt         'C 2/c' 
_space_group_name_Hall            '-C 2yc' 
  
_shelx_space_group_comment 
; 
The symmetry employed for this shelxl refinement is uniquely defined 
by the following loop, which should always be used as a source of 
symmetry information in preference to the above space-group names. 
They are only intended as comments. 
; 
  
loop_ 
 _space_group_symop_operation_xyz 
 'x, y, z' 
 '-x, y, -z+1/2' 
 'x+1/2, y+1/2, z' 
 '-x+1/2, y+1/2, -z+1/2' 
 '-x, -y, -z' 
 'x, -y, z-1/2' 
 '-x+1/2, -y+1/2, -z' 
 'x+1/2, -y+1/2, z-1/2' 
  
_cell_length_a                    33.8994(11) 
_cell_length_b                    16.6003(5) 
_cell_length_c                    15.8715(5) 
_cell_angle_alpha                 90 
_cell_angle_beta                  101.5620(10) 
_cell_angle_gamma                 90 
_cell_volume                      8750.3(5) 
_cell_formula_units_Z             4 
_cell_measurement_temperature     90(2) 
_cell_measurement_reflns_used     9813 
_cell_measurement_theta_min       2.45 
_cell_measurement_theta_max       31.11 
  
_exptl_crystal_description        block 
_exptl_crystal_colour             colorless 
_exptl_crystal_density_meas       ? 
_exptl_crystal_density_method     ? 
_exptl_crystal_density_diffrn     1.689 
_exptl_crystal_F_000              4328 
_exptl_transmission_factor_min    ? 
_exptl_transmission_factor_max    ? 
_exptl_crystal_size_max           0.400 
_exptl_crystal_size_mid           0.200 
_exptl_crystal_size_min           0.190 
_exptl_absorpt_coefficient_mu     2.199 
_shelx_estimated_absorpt_T_min    0.473 
_shelx_estimated_absorpt_T_max    0.680 
_exptl_absorpt_correction_type    multi-scan 
_exptl_absorpt_correction_T_min   0.57 
_exptl_absorpt_correction_T_max   0.68 
_exptl_absorpt_process_details    'SADABS; Sheldrick, 1996' 
_exptl_absorpt_special_details    ? 
_diffrn_ambient_temperature       90(2) 
_diffrn_radiation_wavelength      0.71073 
_diffrn_radiation_type            MoK\a 
_diffrn_source                    ? 
_diffrn_measurement_device_type   'CCD area detector' 
_diffrn_measurement_method        'phi and omega scans' 
_diffrn_detector_area_resol_mean  8.333 
_diffrn_reflns_number             33716 
_diffrn_reflns_av_unetI/netI      0.0267 
_diffrn_reflns_av_R_equivalents   0.0197 
_diffrn_reflns_limit_h_min        -37 
_diffrn_reflns_limit_h_max        49 
_diffrn_reflns_limit_k_min        -24 
_diffrn_reflns_limit_k_max        23 
_diffrn_reflns_limit_l_min        -20 
_diffrn_reflns_limit_l_max        22 
_diffrn_reflns_theta_min          1.226 
_diffrn_reflns_theta_max          31.454 
_diffrn_reflns_theta_full         25.000 
_diffrn_measured_fraction_theta_max   0.915 
_diffrn_measured_fraction_theta_full  1.000 
_diffrn_reflns_Laue_measured_fraction_max    0.915 
_diffrn_reflns_Laue_measured_fraction_full   1.000 
_diffrn_reflns_point_group_measured_fraction_max   0.915 
_diffrn_reflns_point_group_measured_fraction_full  1.000 
_reflns_number_total              13296 
_reflns_number_gt                 10108 
_reflns_threshold_expression      'I > 2\s(I)' 
_reflns_Friedel_coverage          0.000 
_reflns_Friedel_fraction_max      . 
_reflns_Friedel_fraction_full     . 
  
_reflns_special_details 
; 
 Reflections were merged by SHELXL according to the crystal 
 class for the calculation of statistics and refinement. 
  
 _reflns_Friedel_fraction is defined as the number of unique 
 Friedel pairs measured divided by the number that would be 
 possible theoretically, ignoring centric projections and 
 systematic absences. 
; 
  
_computing_data_collection        'Bruker APEX2' 
_computing_cell_refinement        'SAINT V8.34A (Bruker AXS Inc., 2013)'
_computing_data_reduction         'SAINT V8.34A (Bruker AXS Inc., 2013)'
_computing_structure_solution     'SHELXS-97 (Sheldrick 2008)' 
_computing_structure_refinement   'SHELXL-2014/7 (Sheldrick, 2014)' 
_computing_molecular_graphics     'Bruker SHELXTL' 
_computing_publication_material   'Bruker SHELXTL' 
_refine_special_details           ? 
_refine_ls_structure_factor_coef  Fsqd 
_refine_ls_matrix_type            full 
_refine_ls_weighting_scheme       calc 
_refine_ls_weighting_details 
'w=1/[\s^2^(Fo^2^)+(0.0602P)^2^+587.1200P] where P=(Fo^2^+2Fc^2^)/3' 
_atom_sites_solution_primary      ? 
_atom_sites_solution_secondary    ? 
_atom_sites_solution_hydrogens    mixed 
_refine_ls_hydrogen_treatment     mixed 
_refine_ls_extinction_method      none 
_refine_ls_extinction_coef        . 
_refine_ls_number_reflns          13296 
_refine_ls_number_parameters      478 
_refine_ls_number_restraints      205 
_refine_ls_R_factor_all           0.1212 
_refine_ls_R_factor_gt            0.0967 
_refine_ls_wR_factor_ref          0.2460 
_refine_ls_wR_factor_gt           0.2291 
_refine_ls_goodness_of_fit_ref    1.072 
_refine_ls_restrained_S_all       1.071 
_refine_ls_shift/su_max           0.001 
_refine_ls_shift/su_mean          0.000 
  
loop_ 
 _atom_site_label 
 _atom_site_type_symbol 
 _atom_site_fract_x 
 _atom_site_fract_y 
 _atom_site_fract_z 
 _atom_site_U_iso_or_equiv 
 _atom_site_adp_type 
 _atom_site_occupancy 
 _atom_site_site_symmetry_order 
 _atom_site_calc_flag 
 _atom_site_refinement_flags_posn 
 _atom_site_refinement_flags_adp 
 _atom_site_refinement_flags_occupancy 
 _atom_site_disorder_assembly 
 _atom_site_disorder_group 
Cd1 Cd 0.33520(2) 0.11702(4) 0.91678(4) 0.02069(14) Uani 1 1 d . . . . . 
Cd2 Cd 0.0000 0.11743(6) 0.2500 0.0262(2) Uani 1 2 d S T P . . 
Cd3 Cd 0.41895(2) 0.10503(4) 1.25899(4) 0.02503(15) Uani 1 1 d . . . . . 
Cd4 Cd 0.24977(2) 0.09866(6) 0.57789(5) 0.0403(2) Uani 1 1 d . . . . . 
Cd5 Cd 0.08818(2) 0.09309(4) 0.58765(4) 0.02119(14) Uani 1 1 d . . . . . 
N1 N 0.2955(3) 0.1246(7) 0.7826(5) 0.042(2) Uani 1 1 d . . . . . 
N2 N 0.2945(2) 0.0206(5) 0.9607(5) 0.0289(16) Uani 1 1 d . . . . . 
N3 N 0.3788(2) 0.0331(5) 0.8702(5) 0.0282(16) Uani 1 1 d . . . . . 
N4 N 0.3693(3) 0.1265(6) 1.0558(5) 0.038(2) Uani 1 1 d . . . . . 
N5 N 0.0384(2) 0.1195(5) 0.3860(5) 0.0252(15) Uani 1 1 d . . . . . 
N6 N 0.0441(3) 0.0283(7) 0.2060(6) 0.050(3) Uani 1 1 d . . . . . 
N7 N 0.4152(2) 0.2244(5) 1.3191(5) 0.0294(16) Uani 1 1 d . . . . . 
N8 N 0.1521(3) 0.0712(6) 0.5851(6) 0.040(2) Uani 1 1 d . . . . . 
N9 N 0.4833(3) 0.0862(4) 1.2532(5) 0.0238(15) Uani 0.5 1 d . . P . . 
N10 N 0.2484(4) 0.2195(9) 0.5170(7) 0.058(4) Uani 0.5 1 d . . P . . 
C1 C 0.2795(3) 0.1144(8) 0.7128(7) 0.039(2) Uani 1 1 d . . . . . 
C2 C 0.2774(2) 0.0199(6) 0.4980(5) 0.0234(16) Uani 1 1 d . . . . . 
C3 C 0.3955(3) 0.0128(6) 1.3344(6) 0.0305(19) Uani 1 1 d . . . . . 
C4 C 0.3855(3) 0.1184(6) 1.1248(6) 0.0289(18) Uani 1 1 d . . . . . 
C5 C 0.0561(3) 0.1096(5) 0.4546(5) 0.0220(15) Uani 1 1 d . . . . . 
C6 C 0.0613(3) 0.0117(6) 0.6677(6) 0.0300(19) Uani 1 1 d . . . . . 
C7 C 0.0882(2) 0.2131(5) 0.6506(5) 0.0204(14) Uani 1 1 d . . . . . 
C8 C 0.1856(3) 0.0730(7) 0.5782(7) 0.037(2) Uani 1 1 d . . . . . 
C9 C 0.4833(3) 0.0862(4) 1.2532(5) 0.0238(15) Uani 0.5 1 d . . P . . 
C10 C 0.2484(4) 0.2195(9) 0.5170(7) 0.058(4) Uani 0.5 1 d . . P . . 
O1 O 0.2904(3) 0.2139(5) 0.9550(5) 0.044(2) Uani 1 1 d D . . . . 
H1A H 0.305(4) 0.242(8) 0.993(8) 0.066 Uiso 1 1 d D U . . . 
H1B H 0.280(4) 0.196(9) 0.995(7) 0.066 Uiso 1 1 d D U . . . 
O2 O 0.3725(3) 0.2268(5) 0.8826(6) 0.047(2) Uani 1 1 d D . . . . 
H2 H 0.3971(12) 0.218(10) 0.886(11) 0.070 Uiso 1 1 d D U . . . 
C11 C 0.3630(5) 0.3076(11) 0.8488(10) 0.067(4) Uani 1 1 d . U . . . 
H11A H 0.3872 0.3422 0.8623 0.080 Uiso 1 1 calc R U . . . 
H11B H 0.3417 0.3318 0.8754 0.080 Uiso 1 1 calc R U . . . 
C12 C 0.3485(4) 0.3013(10) 0.7515(11) 0.061(4) Uani 1 1 d . . . . . 
H12A H 0.3272 0.2596 0.7393 0.073 Uiso 1 1 calc R U . . . 
H12B H 0.3362 0.3533 0.7298 0.073 Uiso 1 1 calc R U . . . 
O3 O 0.3796(2) 0.2815(5) 0.7051(7) 0.049(2) Uani 1 1 d . . . . . 
C13 C 0.3731(4) 0.2517(8) 0.6179(7) 0.049(2) Uani 1 1 d D U . . . 
H13A H 0.3443 0.2370 0.5997 0.059 Uiso 0.439(12) 1 calc R U P A 1 
H13B H 0.3787 0.2958 0.5800 0.059 Uiso 0.439(12) 1 calc R U P A 1 
H13C H 0.3603 0.2965 0.5812 0.059 Uiso 0.561(12) 1 calc R U P A 2 
H13D H 0.4002 0.2447 0.6048 0.059 Uiso 0.561(12) 1 calc R U P A 2 
C14 C 0.3956(8) 0.1875(14) 0.6061(15) 0.040(3) Uani 0.439(12) 1 d D U P A 1 
H14 H 0.4232 0.2111 0.6130 0.048 Uiso 0.439(12) 1 calc R U P A 1 
C15 C 0.4008(7) 0.1236(12) 0.6829(14) 0.032(2) Uani 0.439(12) 1 d D U P A 1 
H15A H 0.4184 0.1462 0.7341 0.047 Uiso 0.439(12) 1 calc R U P A 1 
H15B H 0.4129 0.0741 0.6658 0.047 Uiso 0.439(12) 1 calc R U P A 1 
H15C H 0.3744 0.1113 0.6960 0.047 Uiso 0.439(12) 1 calc R U P A 1 
C16 C 0.3912(9) 0.1481(15) 0.5296(15) 0.047(4) Uani 0.439(12) 1 d D U P A 1 
H16A H 0.3625 0.1388 0.5064 0.071 Uiso 0.439(12) 1 calc R U P A 1 
H16B H 0.4053 0.0963 0.5382 0.071 Uiso 0.439(12) 1 calc R U P A 1 
H16C H 0.4026 0.1809 0.4890 0.071 Uiso 0.439(12) 1 calc R U P A 1 
C14' C 0.3532(6) 0.1881(12) 0.5891(12) 0.040(3) Uani 0.561(12) 1 d D U P A 2 
H14' H 0.3247 0.1917 0.5970 0.048 Uiso 0.561(12) 1 calc R U P A 2 
C15' C 0.3743(5) 0.1082(9) 0.6324(11) 0.032(2) Uani 0.561(12) 1 d D U P A 2 
H15D H 0.3876 0.0803 0.5912 0.047 Uiso 0.561(12) 1 calc R U P A 2 
H15E H 0.3540 0.0728 0.6487 0.047 Uiso 0.561(12) 1 calc R U P A 2 
H15F H 0.3944 0.1225 0.6837 0.047 Uiso 0.561(12) 1 calc R U P A 2 
C16' C 0.3551(7) 0.1821(14) 0.4900(11) 0.047(4) Uani 0.561(12) 1 d D U P A 2 
H16D H 0.3533 0.2362 0.4649 0.071 Uiso 0.561(12) 1 calc R U P A 2 
H16E H 0.3325 0.1493 0.4600 0.071 Uiso 0.561(12) 1 calc R U P A 2 
H16F H 0.3805 0.1570 0.4840 0.071 Uiso 0.561(12) 1 calc R U P A 2 
O4 O 0.0406(2) 0.2202(6) 0.2159(5) 0.043(2) Uani 1 1 d D . . . . 
H4 H 0.0657(7) 0.216(10) 0.232(10) 0.064 Uiso 1 1 d D U . . . 
C21 C 0.0312(6) 0.3061(10) 0.1850(10) 0.073(5) Uani 1 1 d . . . . . 
H21A H 0.0558 0.3398 0.1988 0.087 Uiso 1 1 calc R U . . . 
H21B H 0.0104 0.3297 0.2133 0.087 Uiso 1 1 calc R U . . . 
C22 C 0.0157(4) 0.3020(9) 0.0861(10) 0.053(3) Uani 1 1 d . U . . . 
H22A H -0.0099 0.3322 0.0809 0.064 Uiso 0.482(10) 1 calc R U P B 1 
H22B H 0.0072 0.2449 0.0798 0.064 Uiso 0.482(10) 1 calc R U P B 1 
H22C H -0.0112 0.2764 0.0736 0.064 Uiso 0.518(10) 1 calc R U P B 2 
H22D H 0.0129 0.3573 0.0623 0.064 Uiso 0.518(10) 1 calc R U P B 2 
O5 O 0.0260(5) 0.3192(10) -0.0140(12) 0.0468(18) Uani 0.482(10) 1 d D U P B 1 
C23 C 0.0480(6) 0.2574(11) -0.0402(13) 0.0468(18) Uani 0.482(10) 1 d D U P B 1 
H23A H 0.0690 0.2386 0.0084 0.056 Uiso 0.482(10) 1 calc R U P B 1 
H23B H 0.0611 0.2758 -0.0871 0.056 Uiso 0.482(10) 1 calc R U P B 1 
C24 C 0.0196(7) 0.1926(13) -0.0704(10) 0.0468(18) Uani 0.482(10) 1 d D U P B 1 
H24 H -0.0079 0.2013 -0.0584 0.056 Uiso 0.482(10) 1 calc R U P B 1 
C25 C 0.0433(6) 0.1110(11) -0.0223(16) 0.036(3) Uani 0.482(10) 1 d D U P B 1 
H25A H 0.0721 0.1151 -0.0217 0.055 Uiso 0.482(10) 1 calc R U P B 1 
H25B H 0.0324 0.0625 -0.0539 0.055 Uiso 0.482(10) 1 calc R U P B 1 
H25C H 0.0390 0.1077 0.0369 0.055 Uiso 0.482(10) 1 calc R U P B 1 
O5' O 0.0436(4) 0.2554(10) 0.0438(10) 0.0468(18) Uani 0.518(10) 1 d D U P B 2 
C23' C 0.0191(6) 0.2518(12) -0.0381(11) 0.0468(18) Uani 0.518(10) 1 d D U P B 2 
H23C H 0.0249 0.2964 -0.0751 0.056 Uiso 0.518(10) 1 calc R U P B 2 
H23D H -0.0098 0.2524 -0.0355 0.056 Uiso 0.518(10) 1 calc R U P B 2 
C24' C 0.0313(6) 0.1741(11) -0.0675(10) 0.0468(18) Uani 0.518(10) 1 d D U P B 2 
H24' H 0.0145 0.1299 -0.0503 0.056 Uiso 0.518(10) 1 calc R U P B 2 
C25' C 0.0809(5) 0.1483(12) -0.0436(15) 0.036(3) Uani 0.518(10) 1 d D U P B 2 
H25D H 0.0965 0.1871 -0.0700 0.055 Uiso 0.518(10) 1 calc R U P B 2 
H25E H 0.0843 0.0943 -0.0659 0.055 Uiso 0.518(10) 1 calc R U P B 2 
H25F H 0.0903 0.1487 0.0190 0.055 Uiso 0.518(10) 1 calc R U P B 2 
C26 C 0.0208(5) 0.1861(10) -0.1756(9) 0.064(3) Uani 1 1 d D U . . . 
H26A H 0.0024 0.1435 -0.2021 0.096 Uiso 0.482(10) 1 calc R U P B 1 
H26B H 0.0124 0.2376 -0.2037 0.096 Uiso 0.482(10) 1 calc R U P B 1 
H26C H 0.0482 0.1734 -0.1823 0.096 Uiso 0.482(10) 1 calc R U P B 1 
H26D H 0.0279 0.1368 -0.2032 0.096 Uiso 0.518(10) 1 calc R U P B 2 
H26E H -0.0080 0.1971 -0.1949 0.096 Uiso 0.518(10) 1 calc R U P B 2 
H26F H 0.0365 0.2313 -0.1913 0.096 Uiso 0.518(10) 1 calc R U P B 2 
O6 O 0.1847(9) 0.128(2) 0.9881(15) 0.083(5) Uani 0.439(7) 1 d . U P C 1 
H6 H 0.2022 0.1645 1.0009 0.124 Uiso 0.439(7) 1 calc R U P C 1 
C32 C 0.1852(9) 0.1002(19) 0.9091(19) 0.045(3) Uani 0.439(7) 1 d . U P C 1 
H32A H 0.1652 0.0563 0.8967 0.054 Uiso 0.439(7) 1 calc R U P C 1 
H32B H 0.2120 0.0757 0.9106 0.054 Uiso 0.439(7) 1 calc R U P C 1 
C33 C 0.1779(7) 0.1523(15) 0.8421(15) 0.032(2) Uani 0.439(7) 1 d . U P C 1 
H33A H 0.1517 0.1794 0.8403 0.038 Uiso 0.439(7) 1 calc R U P C 1 
H33B H 0.1763 0.1224 0.7876 0.038 Uiso 0.439(7) 1 calc R U P C 1 
O7 O 0.2094(5) 0.2118(11) 0.8505(10) 0.0277(18) Uani 0.439(7) 1 d . U P C 1 
C34 C 0.2015(6) 0.2613(13) 0.7766(12) 0.0251(19) Uani 0.439(7) 1 d . U P C 1 
H34A H 0.1752 0.2885 0.7725 0.030 Uiso 0.439(7) 1 calc R U P C 1 
H34B H 0.2002 0.2279 0.7244 0.030 Uiso 0.439(7) 1 calc R U P C 1 
C35 C 0.2310(8) 0.3695(16) 0.6966(17) 0.039(2) Uani 0.439(7) 1 d . U P C 1 
H35A H 0.2058 0.4001 0.6870 0.058 Uiso 0.439(7) 1 calc R U P C 1 
H35B H 0.2297 0.3289 0.6513 0.058 Uiso 0.439(7) 1 calc R U P C 1 
H35C H 0.2535 0.4063 0.6952 0.058 Uiso 0.439(7) 1 calc R U P C 1 
C36 C 0.2335(8) 0.3823(16) 0.8500(17) 0.039(2) Uani 0.439(7) 1 d . U P C 1 
H36A H 0.2097 0.4164 0.8321 0.058 Uiso 0.439(7) 1 calc R U P C 1 
H36B H 0.2576 0.4163 0.8638 0.058 Uiso 0.439(7) 1 calc R U P C 1 
H36C H 0.2307 0.3512 0.9010 0.058 Uiso 0.439(7) 1 calc R U P C 1 
O6' O 0.2649(7) 0.3807(15) 0.8598(12) 0.083(5) Uani 0.561(7) 1 d . U P C 2 
H6' H 0.2668 0.3556 0.9064 0.124 Uiso 0.561(7) 1 calc R U P C 2 
C32' C 0.2053(7) 0.3261(14) 0.8058(14) 0.045(3) Uani 0.561(7) 1 d . U P C 2 
H32C H 0.1830 0.3199 0.7553 0.054 Uiso 0.561(7) 1 calc R U P C 2 
H32D H 0.2010 0.3770 0.8352 0.054 Uiso 0.561(7) 1 calc R U P C 2 
O7' O 0.2050(4) 0.2627(8) 0.8608(7) 0.0277(18) Uani 0.561(7) 1 d . U P C 2 
C33' C 0.1943(6) 0.1847(12) 0.8197(12) 0.032(2) Uani 0.561(7) 1 d . U P C 2 
H33C H 0.1684 0.1900 0.7781 0.038 Uiso 0.561(7) 1 calc R U P C 2 
H33D H 0.2151 0.1689 0.7873 0.038 Uiso 0.561(7) 1 calc R U P C 2 
C34' C 0.1907(5) 0.1238(10) 0.8796(10) 0.0251(19) Uani 0.561(7) 1 d . U P C 2 
H34C H 0.2149 0.1239 0.9273 0.030 Uiso 0.561(7) 1 calc R U P C 2 
C35' C 0.1855(6) 0.0393(12) 0.8359(13) 0.039(2) Uani 0.561(7) 1 d . U P C 2 
H35D H 0.1666 0.0433 0.7806 0.058 Uiso 0.561(7) 1 calc R U P C 2 
H35E H 0.1750 0.0013 0.8732 0.058 Uiso 0.561(7) 1 calc R U P C 2 
H35F H 0.2117 0.0203 0.8266 0.058 Uiso 0.561(7) 1 calc R U P C 2 
C36' C 0.1476(6) 0.1414(12) 0.9205(13) 0.039(2) Uani 0.561(7) 1 d . U P C 2 
H36D H 0.1489 0.1956 0.9454 0.058 Uiso 0.561(7) 1 calc R U P C 2 
H36E H 0.1459 0.1015 0.9652 0.058 Uiso 0.561(7) 1 calc R U P C 2 
H36F H 0.1238 0.1369 0.8742 0.058 Uiso 0.561(7) 1 calc R U P C 2 
C31 C 0.2372(4) 0.3289(9) 0.7822(8) 0.048(2) Uani 1 1 d . U . . . 
H31A H 0.2641 0.3020 0.7949 0.058 Uiso 0.439(7) 1 calc R U P C 1 
H31B H 0.2344 0.3568 0.7262 0.058 Uiso 0.561(7) 1 calc R U P C 2 
H31C H 0.2484 0.2743 0.7776 0.058 Uiso 0.561(7) 1 calc R U P C 2 
  
loop_ 
 _atom_site_aniso_label 
 _atom_site_aniso_U_11 
 _atom_site_aniso_U_22 
 _atom_site_aniso_U_33 
 _atom_site_aniso_U_23 
 _atom_site_aniso_U_13 
 _atom_site_aniso_U_12 
Cd1 0.0271(3) 0.0216(3) 0.0140(2) 0.0013(2) 0.0056(2) 0.0085(2) 
Cd2 0.0351(5) 0.0300(4) 0.0146(4) 0.000 0.0079(3) 0.000 
Cd3 0.0334(3) 0.0260(3) 0.0158(3) -0.0027(2) 0.0053(2) -0.0126(2) 
Cd4 0.0228(3) 0.0739(6) 0.0223(3) -0.0137(3) 0.0001(2) 0.0140(3) 
Cd5 0.0213(3) 0.0266(3) 0.0168(3) 0.0055(2) 0.0065(2) 0.0086(2) 
N1 0.040(5) 0.063(6) 0.019(4) -0.002(4) 0.002(3) 0.023(5) 
N2 0.024(4) 0.037(4) 0.028(4) 0.003(3) 0.012(3) 0.007(3) 
N3 0.032(4) 0.029(4) 0.028(4) 0.011(3) 0.017(3) 0.015(3) 
N4 0.040(5) 0.053(6) 0.021(4) -0.008(4) 0.009(3) -0.006(4) 
N5 0.035(4) 0.021(3) 0.019(3) 0.000(3) 0.006(3) 0.008(3) 
N6 0.056(6) 0.060(7) 0.027(4) -0.019(4) -0.007(4) 0.017(5) 
N7 0.027(4) 0.033(4) 0.029(4) 0.001(3) 0.008(3) -0.002(3) 
N8 0.030(4) 0.050(6) 0.043(5) -0.002(4) 0.009(4) 0.018(4) 
N9 0.040(4) 0.013(3) 0.017(3) 0.000(3) 0.003(3) -0.001(3) 
N10 0.060(7) 0.082(10) 0.024(5) -0.004(5) -0.011(5) 0.040(7) 
C1 0.034(5) 0.055(7) 0.028(5) -0.005(4) 0.006(4) 0.017(5) 
C2 0.015(3) 0.035(4) 0.021(4) 0.003(3) 0.008(3) -0.007(3) 
C3 0.037(5) 0.036(5) 0.020(4) -0.008(3) 0.009(3) -0.014(4) 
C4 0.032(4) 0.036(5) 0.020(4) -0.008(3) 0.010(3) -0.006(4) 
C5 0.030(4) 0.017(3) 0.021(4) 0.001(3) 0.010(3) 0.009(3) 
C6 0.039(5) 0.029(4) 0.022(4) 0.007(3) 0.005(4) -0.004(4) 
C7 0.018(3) 0.021(4) 0.022(4) 0.003(3) 0.005(3) 0.003(3) 
C8 0.026(4) 0.053(6) 0.034(5) -0.002(5) 0.010(4) 0.014(4) 
C9 0.040(4) 0.013(3) 0.017(3) 0.000(3) 0.003(3) -0.001(3) 
C10 0.060(7) 0.082(10) 0.024(5) -0.004(5) -0.011(5) 0.040(7) 
O1 0.073(6) 0.035(4) 0.032(4) 0.013(3) 0.029(4) 0.027(4) 
O2 0.071(6) 0.024(3) 0.060(5) 0.000(3) 0.047(5) 0.000(4) 
C11 0.071(8) 0.075(8) 0.059(7) -0.004(6) 0.023(6) 0.008(6) 
C12 0.047(7) 0.057(8) 0.077(10) 0.022(8) 0.008(7) -0.006(6) 
O3 0.032(4) 0.033(4) 0.087(7) -0.035(4) 0.027(4) -0.006(3) 
C13 0.065(7) 0.053(5) 0.030(5) 0.020(4) 0.012(4) 0.004(4) 
C14 0.050(7) 0.047(5) 0.025(5) 0.012(4) 0.013(4) -0.001(4) 
C15 0.034(6) 0.036(5) 0.024(5) 0.004(4) 0.002(4) -0.005(4) 
C16 0.061(10) 0.055(7) 0.028(5) 0.010(4) 0.015(5) -0.013(6) 
C14' 0.050(7) 0.047(5) 0.025(5) 0.012(4) 0.013(4) -0.001(4) 
C15' 0.034(6) 0.036(5) 0.024(5) 0.004(4) 0.002(4) -0.005(4) 
C16' 0.061(10) 0.055(7) 0.028(5) 0.010(4) 0.015(5) -0.013(6) 
O4 0.036(4) 0.063(5) 0.024(3) 0.025(3) -0.006(3) -0.015(4) 
C21 0.115(15) 0.056(9) 0.052(9) 0.018(7) 0.030(9) 0.028(9) 
C22 0.037(6) 0.060(7) 0.066(6) 0.011(5) 0.019(5) 0.004(5) 
O5 0.036(4) 0.048(4) 0.062(4) 0.020(3) 0.022(3) 0.017(3) 
C23 0.036(4) 0.048(4) 0.062(4) 0.020(3) 0.022(3) 0.017(3) 
C24 0.036(4) 0.048(4) 0.062(4) 0.020(3) 0.022(3) 0.017(3) 
C25 0.029(5) 0.029(5) 0.054(7) -0.001(5) 0.016(5) -0.002(4) 
O5' 0.036(4) 0.048(4) 0.062(4) 0.020(3) 0.022(3) 0.017(3) 
C23' 0.036(4) 0.048(4) 0.062(4) 0.020(3) 0.022(3) 0.017(3) 
C24' 0.036(4) 0.048(4) 0.062(4) 0.020(3) 0.022(3) 0.017(3) 
C25' 0.029(5) 0.029(5) 0.054(7) -0.001(5) 0.016(5) -0.002(4) 
C26 0.063(8) 0.069(8) 0.063(5) 0.012(5) 0.020(5) 0.005(6) 
O6 0.094(9) 0.116(11) 0.039(5) 0.000(6) 0.015(5) -0.061(9) 
C32 0.043(6) 0.049(6) 0.039(5) 0.019(4) -0.004(4) -0.006(4) 
C33 0.034(6) 0.037(4) 0.024(4) 0.002(3) 0.005(4) -0.001(4) 
O7 0.025(4) 0.034(4) 0.022(4) 0.006(3) -0.001(3) 0.000(3) 
C34 0.029(5) 0.027(4) 0.016(4) 0.001(3) -0.002(3) 0.006(3) 
C35 0.044(5) 0.036(4) 0.037(4) 0.001(3) 0.009(4) -0.006(3) 
C36 0.044(5) 0.036(4) 0.037(4) 0.001(3) 0.009(4) -0.006(3) 
O6' 0.094(9) 0.116(11) 0.039(5) 0.000(6) 0.015(5) -0.061(9) 
C32' 0.043(6) 0.049(6) 0.039(5) 0.019(4) -0.004(4) -0.006(4) 
O7' 0.025(4) 0.034(4) 0.022(4) 0.006(3) -0.001(3) 0.000(3) 
C33' 0.034(6) 0.037(4) 0.024(4) 0.002(3) 0.005(4) -0.001(4) 
C34' 0.029(5) 0.027(4) 0.016(4) 0.001(3) -0.002(3) 0.006(3) 
C35' 0.044(5) 0.036(4) 0.037(4) 0.001(3) 0.009(4) -0.006(3) 
C36' 0.044(5) 0.036(4) 0.037(4) 0.001(3) 0.009(4) -0.006(3) 
C31 0.049(5) 0.053(5) 0.042(4) 0.010(4) 0.008(4) 0.004(4) 
  
_geom_special_details 
; 
 All esds (except the esd in the dihedral angle between two l.s. planes) 
 are estimated using the full covariance matrix.  The cell esds are taken 
 into account individually in the estimation of esds in distances, angles 
 and torsion angles; correlations between esds in cell parameters are only 
 used when they are defined by crystal symmetry.  An approximate (isotropic) 
 treatment of cell esds is used for estimating esds involving l.s. planes. 
; 
  
loop_ 
 _geom_bond_atom_site_label_1 
 _geom_bond_atom_site_label_2 
 _geom_bond_distance 
 _geom_bond_site_symmetry_2 
 _geom_bond_publ_flag 
Cd1 N3 2.261(7) . ? 
Cd1 N4 2.282(9) . ? 
Cd1 N1 2.282(9) . ? 
Cd1 N2 2.310(8) . ? 
Cd1 O2 2.343(8) . ? 
Cd1 O1 2.372(7) . ? 
Cd2 N5 2.286(8) 2 ? 
Cd2 N5 2.286(8) . ? 
Cd2 N6 2.309(10) 2 ? 
Cd2 N6 2.309(10) . ? 
Cd2 O4 2.323(8) . ? 
Cd2 O4 2.323(8) 2 ? 
Cd3 C3 2.189(10) . ? 
Cd3 C4 2.214(10) . ? 
Cd3 N7 2.214(9) . ? 
Cd3 N9 2.224(9) . ? 
Cd4 C2 2.161(9) . ? 
Cd4 C1 2.191(11) . ? 
Cd4 C8 2.218(10) . ? 
Cd4 N10 2.223(14) . ? 
Cd5 C6 2.176(9) . ? 
Cd5 C5 2.190(9) . ? 
Cd5 N8 2.205(9) . ? 
Cd5 C7 2.228(8) . ? 
N1 C1 1.146(14) . ? 
N2 C2 1.130(12) 6_556 ? 
N3 C3 1.162(12) 6 ? 
N4 C4 1.130(13) . ? 
N5 C5 1.145(12) . ? 
N6 C6 1.136(13) 6 ? 
N7 C7 1.159(12) 7_557 ? 
N8 C8 1.163(14) . ? 
N9 C9 1.156(17) 2_657 ? 
N10 C10 1.16(3) 7_556 ? 
C2 N2 1.130(12) 6 ? 
C3 N3 1.162(12) 6_556 ? 
C6 N6 1.136(13) 6_556 ? 
C7 N7 1.159(12) 7_557 ? 
O1 H1A 0.838(10) . ? 
O1 H1B 0.840(10) . ? 
O2 C11 1.455(19) . ? 
O2 H2 0.840(10) . ? 
C11 C12 1.53(2) . ? 
C11 H11A 0.9900 . ? 
C11 H11B 0.9900 . ? 
C12 O3 1.441(17) . ? 
C12 H12A 0.9900 . ? 
C12 H12B 0.9900 . ? 
O3 C13 1.444(15) . ? 
C13 C14' 1.29(2) . ? 
C13 C14 1.35(2) . ? 
C13 H13A 0.9900 . ? 
C13 H13B 0.9900 . ? 
C13 H13C 0.9900 . ? 
C13 H13D 0.9900 . ? 
C14 C16 1.36(3) . ? 
C14 C15 1.60(3) . ? 
C14 H14 1.0000 . ? 
C15 H15A 0.9800 . ? 
C15 H15B 0.9800 . ? 
C15 H15C 0.9800 . ? 
C16 H16A 0.9800 . ? 
C16 H16B 0.9800 . ? 
C16 H16C 0.9800 . ? 
C14' C16' 1.59(2) . ? 
C14' C15' 1.60(3) . ? 
C14' H14' 1.0000 . ? 
C15' H15D 0.9800 . ? 
C15' H15E 0.9800 . ? 
C15' H15F 0.9800 . ? 
C16' H16D 0.9800 . ? 
C16' H16E 0.9800 . ? 
C16' H16F 0.9800 . ? 
O4 C21 1.521(17) . ? 
O4 H4 0.839(10) . ? 
C21 C22 1.55(2) . ? 
C21 H21A 0.9900 . ? 
C21 H21B 0.9900 . ? 
C22 O5' 1.483(19) . ? 
C22 O5 1.72(2) . ? 
C22 H22A 0.9900 . ? 
C22 H22B 0.9900 . ? 
C22 H22C 0.9900 . ? 
C22 H22D 0.9900 . ? 
O5 C23 1.379(10) . ? 
C23 C24 1.458(10) . ? 
C23 H23A 0.9900 . ? 
C23 H23B 0.9900 . ? 
C24 C25 1.678(19) . ? 
C24 C26 1.681(19) . ? 
C24 H24 1.0000 . ? 
C25 H25A 0.9800 . ? 
C25 H25B 0.9800 . ? 
C25 H25C 0.9800 . ? 
O5' C23' 1.396(10) . ? 
C23' C24' 1.460(10) . ? 
C23' H23C 0.9900 . ? 
C23' H23D 0.9900 . ? 
C24' C26 1.692(18) . ? 
C24' C25' 1.700(18) . ? 
C24' H24' 1.0000 . ? 
C25' H25D 0.9800 . ? 
C25' H25E 0.9800 . ? 
C25' H25F 0.9800 . ? 
C26 H26A 0.9800 . ? 
C26 H26B 0.9800 . ? 
C26 H26C 0.9800 . ? 
C26 H26D 0.9800 . ? 
C26 H26E 0.9800 . ? 
C26 H26F 0.9800 . ? 
O6 C32 1.34(4) . ? 
O6 H6 0.8400 . ? 
C32 C33 1.35(3) . ? 
C32 H32A 0.9900 . ? 
C32 H32B 0.9900 . ? 
C33 O7 1.44(3) . ? 
C33 H33A 0.9900 . ? 
C33 H33B 0.9900 . ? 
O7 C34 1.41(2) . ? 
C34 C31 1.64(3) . ? 
C34 H34A 0.9900 . ? 
C34 H34B 0.9900 . ? 
C35 C31 1.49(3) . ? 
C35 H35A 0.9800 . ? 
C35 H35B 0.9800 . ? 
C35 H35C 0.9800 . ? 
C36 C31 1.42(3) . ? 
C36 H36A 0.9800 . ? 
C36 H36B 0.9800 . ? 
C36 H36C 0.9800 . ? 
O6' C31 1.64(2) . ? 
O6' H6' 0.8400 . ? 
C32' C31 1.21(3) . ? 
C32' O7' 1.37(2) . ? 
C32' H32C 0.9900 . ? 
C32' H32D 0.9900 . ? 
O7' C33' 1.46(2) . ? 
C33' C34' 1.41(2) . ? 
C33' H33C 0.9900 . ? 
C33' H33D 0.9900 . ? 
C34' C35' 1.56(3) . ? 
C34' C36' 1.74(3) . ? 
C34' H34C 1.0000 . ? 
C35' H35D 0.9800 . ? 
C35' H35E 0.9800 . ? 
C35' H35F 0.9800 . ? 
C36' H36D 0.9800 . ? 
C36' H36E 0.9800 . ? 
C36' H36F 0.9800 . ? 
C31 H31A 1.0000 . ? 
C31 H31B 0.9900 . ? 
C31 H31C 0.9900 . ? 
  
loop_ 
 _geom_angle_atom_site_label_1 
 _geom_angle_atom_site_label_2 
 _geom_angle_atom_site_label_3 
 _geom_angle 
 _geom_angle_site_symmetry_1 
 _geom_angle_site_symmetry_3 
 _geom_angle_publ_flag 
N3 Cd1 N4 97.0(3) . . ? 
N3 Cd1 N1 91.8(3) . . ? 
N4 Cd1 N1 171.0(4) . . ? 
N3 Cd1 N2 98.1(3) . . ? 
N4 Cd1 N2 88.5(3) . . ? 
N1 Cd1 N2 92.5(4) . . ? 
N3 Cd1 O2 89.1(3) . . ? 
N4 Cd1 O2 88.7(4) . . ? 
N1 Cd1 O2 89.1(4) . . ? 
N2 Cd1 O2 172.5(3) . . ? 
N3 Cd1 O1 174.4(3) . . ? 
N4 Cd1 O1 86.1(3) . . ? 
N1 Cd1 O1 85.0(3) . . ? 
N2 Cd1 O1 86.7(3) . . ? 
O2 Cd1 O1 86.2(3) . . ? 
N5 Cd2 N5 178.3(4) 2 . ? 
N5 Cd2 N6 90.8(3) 2 2 ? 
N5 Cd2 N6 90.3(3) . 2 ? 
N5 Cd2 N6 90.3(3) 2 . ? 
N5 Cd2 N6 90.8(3) . . ? 
N6 Cd2 N6 100.3(7) 2 . ? 
N5 Cd2 O4 91.2(3) 2 . ? 
N5 Cd2 O4 87.6(3) . . ? 
N6 Cd2 O4 172.3(4) 2 . ? 
N6 Cd2 O4 87.1(4) . . ? 
N5 Cd2 O4 87.6(3) 2 2 ? 
N5 Cd2 O4 91.2(3) . 2 ? 
N6 Cd2 O4 87.1(4) 2 2 ? 
N6 Cd2 O4 172.3(4) . 2 ? 
O4 Cd2 O4 85.5(5) . 2 ? 
C3 Cd3 C4 115.1(4) . . ? 
C3 Cd3 N7 109.4(3) . . ? 
C4 Cd3 N7 105.2(3) . . ? 
C3 Cd3 N9 113.0(3) . . ? 
C4 Cd3 N9 107.0(3) . . ? 
N7 Cd3 N9 106.6(3) . . ? 
C2 Cd4 C1 118.5(3) . . ? 
C2 Cd4 C8 115.2(4) . . ? 
C1 Cd4 C8 106.3(4) . . ? 
C2 Cd4 N10 105.3(4) . . ? 
C1 Cd4 N10 106.4(5) . . ? 
C8 Cd4 N10 103.8(5) . . ? 
C6 Cd5 C5 117.1(4) . . ? 
C6 Cd5 N8 115.9(4) . . ? 
C5 Cd5 N8 107.6(3) . . ? 
C6 Cd5 C7 104.8(3) . . ? 
C5 Cd5 C7 106.0(3) . . ? 
N8 Cd5 C7 104.1(3) . . ? 
C1 N1 Cd1 166.2(9) . . ? 
C2 N2 Cd1 166.2(8) 6_556 . ? 
C3 N3 Cd1 167.9(8) 6 . ? 
C4 N4 Cd1 169.1(9) . . ? 
C5 N5 Cd2 170.5(7) . . ? 
C6 N6 Cd2 165.6(9) 6 . ? 
C7 N7 Cd3 177.6(8) 7_557 . ? 
C8 N8 Cd5 168.3(10) . . ? 
C9 N9 Cd3 171.5(4) 2_657 . ? 
C10 N10 Cd4 172.7(16) 7_556 . ? 
N1 C1 Cd4 178.0(13) . . ? 
N2 C2 Cd4 174.6(8) 6 . ? 
N3 C3 Cd3 172.3(10) 6_556 . ? 
N4 C4 Cd3 178.0(9) . . ? 
N5 C5 Cd5 177.8(7) . . ? 
N6 C6 Cd5 174.0(10) 6_556 . ? 
N7 C7 Cd5 174.3(7) 7_557 . ? 
N8 C8 Cd4 169.1(10) . . ? 
Cd1 O1 H1A 104(10) . . ? 
Cd1 O1 H1B 109(10) . . ? 
H1A O1 H1B 86(10) . . ? 
C11 O2 Cd1 135.4(9) . . ? 
C11 O2 H2 109(10) . . ? 
Cd1 O2 H2 115(10) . . ? 
O2 C11 C12 108.1(13) . . ? 
O2 C11 H11A 110.1 . . ? 
C12 C11 H11A 110.1 . . ? 
O2 C11 H11B 110.1 . . ? 
C12 C11 H11B 110.1 . . ? 
H11A C11 H11B 108.4 . . ? 
O3 C12 C11 114.4(12) . . ? 
O3 C12 H12A 108.7 . . ? 
C11 C12 H12A 108.7 . . ? 
O3 C12 H12B 108.7 . . ? 
C11 C12 H12B 108.7 . . ? 
H12A C12 H12B 107.6 . . ? 
C12 O3 C13 125.5(10) . . ? 
C14' C13 O3 126.2(12) . . ? 
C14 C13 O3 115.0(14) . . ? 
C14 C13 H13A 108.5 . . ? 
O3 C13 H13A 108.5 . . ? 
C14 C13 H13B 108.5 . . ? 
O3 C13 H13B 108.5 . . ? 
H13A C13 H13B 107.5 . . ? 
C14' C13 H13C 105.8 . . ? 
O3 C13 H13C 105.8 . . ? 
C14' C13 H13D 105.8 . . ? 
O3 C13 H13D 105.8 . . ? 
H13C C13 H13D 106.2 . . ? 
C13 C14 C16 123(2) . . ? 
C13 C14 C15 113.5(17) . . ? 
C16 C14 C15 110(2) . . ? 
C13 C14 H14 102.6 . . ? 
C16 C14 H14 102.6 . . ? 
C15 C14 H14 102.6 . . ? 
C14 C15 H15A 109.5 . . ? 
C14 C15 H15B 109.5 . . ? 
H15A C15 H15B 109.5 . . ? 
C14 C15 H15C 109.5 . . ? 
H15A C15 H15C 109.5 . . ? 
H15B C15 H15C 109.5 . . ? 
C14 C16 H16A 109.5 . . ? 
C14 C16 H16B 109.5 . . ? 
H16A C16 H16B 109.5 . . ? 
C14 C16 H16C 109.5 . . ? 
H16A C16 H16C 109.5 . . ? 
H16B C16 H16C 109.5 . . ? 
C13 C14' C16' 106.3(15) . . ? 
C13 C14' C15' 111.8(16) . . ? 
C16' C14' C15' 105.6(17) . . ? 
C13 C14' H14' 111.0 . . ? 
C16' C14' H14' 111.0 . . ? 
C15' C14' H14' 111.0 . . ? 
C14' C15' H15D 109.5 . . ? 
C14' C15' H15E 109.5 . . ? 
H15D C15' H15E 109.5 . . ? 
C14' C15' H15F 109.5 . . ? 
H15D C15' H15F 109.5 . . ? 
H15E C15' H15F 109.5 . . ? 
C14' C16' H16D 109.5 . . ? 
C14' C16' H16E 109.5 . . ? 
H16D C16' H16E 109.5 . . ? 
C14' C16' H16F 109.5 . . ? 
H16D C16' H16F 109.5 . . ? 
H16E C16' H16F 109.5 . . ? 
C21 O4 Cd2 131.9(10) . . ? 
C21 O4 H4 108(10) . . ? 
Cd2 O4 H4 119(10) . . ? 
O4 C21 C22 106.9(13) . . ? 
O4 C21 H21A 110.3 . . ? 
C22 C21 H21A 110.3 . . ? 
O4 C21 H21B 110.3 . . ? 
C22 C21 H21B 110.3 . . ? 
H21A C21 H21B 108.6 . . ? 
O5' C22 C21 111.2(12) . . ? 
C21 C22 O5 146.7(14) . . ? 
C21 C22 H22A 100.1 . . ? 
O5 C22 H22A 100.1 . . ? 
C21 C22 H22B 100.1 . . ? 
O5 C22 H22B 100.1 . . ? 
H22A C22 H22B 104.2 . . ? 
O5' C22 H22C 109.4 . . ? 
C21 C22 H22C 109.4 . . ? 
O5' C22 H22D 109.4 . . ? 
C21 C22 H22D 109.4 . . ? 
H22C C22 H22D 108.0 . . ? 
C23 O5 C22 112.1(14) . . ? 
O5 C23 C24 106.8(18) . . ? 
O5 C23 H23A 110.4 . . ? 
C24 C23 H23A 110.4 . . ? 
O5 C23 H23B 110.4 . . ? 
C24 C23 H23B 110.4 . . ? 
H23A C23 H23B 108.6 . . ? 
C23 C24 C25 102.9(13) . . ? 
C23 C24 C26 103.2(13) . . ? 
C25 C24 C26 107.3(16) . . ? 
C23 C24 H24 114.1 . . ? 
C25 C24 H24 114.1 . . ? 
C26 C24 H24 114.1 . . ? 
C24 C25 H25A 109.5 . . ? 
C24 C25 H25B 109.5 . . ? 
H25A C25 H25B 109.5 . . ? 
C24 C25 H25C 109.5 . . ? 
H25A C25 H25C 109.5 . . ? 
H25B C25 H25C 109.5 . . ? 
C23' O5' C22 97.4(13) . . ? 
O5' C23' C24' 100.4(11) . . ? 
O5' C23' H23C 111.7 . . ? 
C24' C23' H23C 111.7 . . ? 
O5' C23' H23D 111.7 . . ? 
C24' C23' H23D 111.7 . . ? 
H23C C23' H23D 109.5 . . ? 
C23' C24' C26 101.8(13) . . ? 
C23' C24' C25' 118.8(15) . . ? 
C26 C24' C25' 104.7(14) . . ? 
C23' C24' H24' 110.3 . . ? 
C26 C24' H24' 110.3 . . ? 
C25' C24' H24' 110.3 . . ? 
C24' C25' H25D 109.5 . . ? 
C24' C25' H25E 109.5 . . ? 
H25D C25' H25E 109.5 . . ? 
C24' C25' H25F 109.5 . . ? 
H25D C25' H25F 109.5 . . ? 
H25E C25' H25F 109.5 . . ? 
C24 C26 H26A 109.5 . . ? 
C24 C26 H26B 109.5 . . ? 
H26A C26 H26B 109.5 . . ? 
C24 C26 H26C 109.5 . . ? 
H26A C26 H26C 109.5 . . ? 
H26B C26 H26C 109.5 . . ? 
C24' C26 H26D 109.5 . . ? 
C24' C26 H26E 109.5 . . ? 
H26D C26 H26E 109.5 . . ? 
C24' C26 H26F 109.5 . . ? 
H26D C26 H26F 109.5 . . ? 
H26E C26 H26F 109.5 . . ? 
C32 O6 H6 109.5 . . ? 
O6 C32 C33 119(3) . . ? 
O6 C32 H32A 107.7 . . ? 
C33 C32 H32A 107.7 . . ? 
O6 C32 H32B 107.7 . . ? 
C33 C32 H32B 107.7 . . ? 
H32A C32 H32B 107.1 . . ? 
C32 C33 O7 110(2) . . ? 
C32 C33 H33A 109.6 . . ? 
O7 C33 H33A 109.6 . . ? 
C32 C33 H33B 109.6 . . ? 
O7 C33 H33B 109.6 . . ? 
H33A C33 H33B 108.1 . . ? 
C34 O7 C33 108.0(16) . . ? 
O7 C34 C31 109.8(14) . . ? 
O7 C34 H34A 109.7 . . ? 
C31 C34 H34A 109.7 . . ? 
O7 C34 H34B 109.7 . . ? 
C31 C34 H34B 109.7 . . ? 
H34A C34 H34B 108.2 . . ? 
C31 C35 H35A 109.5 . . ? 
C31 C35 H35B 109.5 . . ? 
H35A C35 H35B 109.5 . . ? 
C31 C35 H35C 109.5 . . ? 
H35A C35 H35C 109.5 . . ? 
H35B C35 H35C 109.5 . . ? 
C31 C36 H36A 109.5 . . ? 
C31 C36 H36B 109.5 . . ? 
H36A C36 H36B 109.5 . . ? 
C31 C36 H36C 109.5 . . ? 
H36A C36 H36C 109.5 . . ? 
H36B C36 H36C 109.5 . . ? 
C31 O6' H6' 109.5 . . ? 
C31 C32' O7' 110.3(18) . . ? 
C31 C32' H32C 109.6 . . ? 
O7' C32' H32C 109.6 . . ? 
C31 C32' H32D 109.6 . . ? 
O7' C32' H32D 109.6 . . ? 
H32C C32' H32D 108.1 . . ? 
C32' O7' C33' 115.4(15) . . ? 
C34' C33' O7' 112.4(14) . . ? 
C34' C33' H33C 109.1 . . ? 
O7' C33' H33C 109.1 . . ? 
C34' C33' H33D 109.1 . . ? 
O7' C33' H33D 109.1 . . ? 
H33C C33' H33D 107.8 . . ? 
C33' C34' C35' 111.3(15) . . ? 
C33' C34' C36' 108.9(14) . . ? 
C35' C34' C36' 106.8(14) . . ? 
C33' C34' H34C 109.9 . . ? 
C35' C34' H34C 109.9 . . ? 
C36' C34' H34C 109.9 . . ? 
C34' C35' H35D 109.5 . . ? 
C34' C35' H35E 109.5 . . ? 
H35D C35' H35E 109.5 . . ? 
C34' C35' H35F 109.5 . . ? 
H35D C35' H35F 109.5 . . ? 
H35E C35' H35F 109.5 . . ? 
C34' C36' H36D 109.5 . . ? 
C34' C36' H36E 109.5 . . ? 
H36D C36' H36E 109.5 . . ? 
C34' C36' H36F 109.5 . . ? 
H36D C36' H36F 109.5 . . ? 
H36E C36' H36F 109.5 . . ? 
C36 C31 C35 112.9(18) . . ? 
C32' C31 O6' 101.5(16) . . ? 
C36 C31 C34 107.1(15) . . ? 
C35 C31 C34 107.0(14) . . ? 
C36 C31 H31A 109.9 . . ? 
C35 C31 H31A 109.9 . . ? 
C34 C31 H31A 109.9 . . ? 
C32' C31 H31B 111.5 . . ? 
O6' C31 H31B 111.5 . . ? 
C32' C31 H31C 111.5 . . ? 
O6' C31 H31C 111.5 . . ? 
H31B C31 H31C 109.3 . . ? 
  
loop_ 
 _geom_hbond_atom_site_label_D 
 _geom_hbond_atom_site_label_H 
 _geom_hbond_atom_site_label_A 
 _geom_hbond_distance_DH 
 _geom_hbond_distance_HA 
 _geom_hbond_distance_DA 
 _geom_hbond_angle_DHA 
 _geom_hbond_site_symmetry_A 
O1 H1A O6  0.838(10) 2.20(12) 2.84(3) 134(15) 7_557 
O1 H1B O7'  0.840(10) 2.35(13) 2.922(14) 126(14) 7_557 
O1 H1A O7  0.838(10) 2.74(14) 3.323(18) 128(14) 7_557 
O1 H1B O7'  0.840(10) 2.35(13) 2.922(14) 126(14) 7_557 
O2 H2 O5'  0.840(10) 2.14(10) 2.865(18) 144(16) 7_556 
O4 H4 O3  0.839(10) 1.92(4) 2.743(11) 165(16) 7_556 
O6 H6 O1  0.84 2.13 2.84(3) 142.0 7_557 
O6' H6' O1  0.84 2.55 3.19(3) 133.5 . 
  
_refine_diff_density_max    4.314 
_refine_diff_density_min   -7.405 
_refine_diff_density_rms    0.320 
  
_shelx_res_file 
; 
  
    test1.res created by SHELXL-2014/7 
  
  
TITL test1 in C2/c 
CELL 0.71073  33.8994  16.6003  15.8715  90.000 101.562  90.000 
ZERR    4.00   0.0011   0.0005   0.0005   0.000   0.001   0.000 
LATT 7 
SYMM -X, Y, 0.5-Z 
SFAC C  H  N  O  Cd 
UNIT 216 352 72 56 36 
L.S. 4 
acta 50 
BOND 
htab 
FMAP 2 
bond $h 
PLAN 20 
isor 0.01 C11 
eadp O6 O6' 
eadp C32 C32' 
eadp C33 C33' 
eadp C34 C34' 
eadp O7 O7' 
eadp C35 C35' C36 C36' 
eadp C16 C16' 
eadp C15 C15' 
eadp C14 C14' 
eadp O5 O5' C23 C23' C24 C24' 
eadp C25 C25' 
sadi C13 C14 C13 C14' 
sadi C13 C15 C13 C15' 
sadi C13 C16 C13 C16' 
rigu C13 > C16' 
rigu C22 > C26 
rigu O6 > C31 
dfix 1.4 0.01 O5 C23 O5' C23' 
dfix 1.45 0.01 C23 C24 C23' C24' 
sadi C24 C25 C24' C25' C24 C26 C24' C26 
sadi C23 C25 C23 C26 
dang 2.3 0.02 O5' C24' 
dfix 0.84 0.01 O4 H4 O1 H1A O1 H1B O2 H2 
exyz N9 C9 
exyz N10 C10 
eadp N9 C9 
eadp N10 C10 
eqiv $1 -x+1/2, -y+1/2, -z+2 
eqiv $2 -x+1/2, -y+1/2, -z+1 
eqiv $3 -x+1, y, -z+5/2 
htab O1 O6_$1 
htab O1 O7'_$1 
htab O1 O7_$1 
htab O1 O7'_$1 
htab O2 O5'_$2 
htab O4 O3_$2 
htab O6 O1_$1 
htab O6' O1 
free C9 C9_$3 N9 N9_$3 C10 C10_$2 N10 N10_$2 
TEMP -183 
size 0.4 0.2 0.19 
WGHT    0.060200  587.119995 
FVAR       0.04996   0.43925   0.43910   0.48241 
MOLE 1 
CD1   5    0.335203    0.117023    0.916784    11.00000    0.02709    0.02159 = 
         0.01403    0.00128    0.00564    0.00855 
CD2   5    0.000000    0.117431    0.250000    10.50000    0.03510    0.02999 = 
         0.01459    0.00000    0.00791    0.00000 
CD3   5    0.418945    0.105032    1.258991    11.00000    0.03345    0.02599 = 
         0.01582   -0.00272    0.00535   -0.01255 
CD4   5    0.249770    0.098660    0.577894    11.00000    0.02282    0.07389 = 
         0.02233   -0.01367    0.00009    0.01400 
CD5   5    0.088180    0.093087    0.587648    11.00000    0.02125    0.02662 = 
         0.01684    0.00550    0.00650    0.00861 
N1    3    0.295530    0.124632    0.782643    11.00000    0.04049    0.06330 = 
         0.01931   -0.00176    0.00245    0.02319 
N2    3    0.294530    0.020559    0.960730    11.00000    0.02411    0.03749 = 
         0.02794    0.00329    0.01224    0.00693 
N3    3    0.378816    0.033118    0.870180    11.00000    0.03250    0.02909 = 
         0.02757    0.01097    0.01703    0.01543 
N4    3    0.369305    0.126526    1.055797    11.00000    0.04005    0.05297 = 
         0.02125   -0.00813    0.00938   -0.00634 
N5    3    0.038378    0.119475    0.386003    11.00000    0.03541    0.02113 = 
         0.01906    0.00046    0.00564    0.00774 
N6    3    0.044123    0.028279    0.206005    11.00000    0.05614    0.06027 = 
         0.02737   -0.01926   -0.00742    0.01714 
N7    3    0.415188    0.224408    1.319149    11.00000    0.02726    0.03344 = 
         0.02854    0.00097    0.00794   -0.00239 
N8    3    0.152088    0.071185    0.585070    11.00000    0.02991    0.04969 = 
         0.04266   -0.00240    0.00911    0.01840 
N9    3    0.483316    0.086174    1.253240    10.50000    0.04049    0.01283 = 
         0.01696   -0.00041    0.00332   -0.00090 
N10   3    0.248396    0.219480    0.516970    10.50000    0.06041    0.08215 = 
         0.02366   -0.00416   -0.01134    0.04002 
C1    1    0.279516    0.114380    0.712768    11.00000    0.03416    0.05475 = 
         0.02795   -0.00536    0.00600    0.01724 
C2    1    0.277386    0.019929    0.497964    11.00000    0.01541    0.03545 = 
         0.02117    0.00343    0.00784   -0.00692 
C3    1    0.395510    0.012760    1.334420    11.00000    0.03721    0.03567 = 
         0.01998   -0.00806    0.00927   -0.01384 
C4    1    0.385480    0.118443    1.124812    11.00000    0.03242    0.03559 = 
         0.02049   -0.00841    0.00997   -0.00625 
C5    1    0.056088    0.109571    0.454626    11.00000    0.03013    0.01685 = 
         0.02095    0.00084    0.00992    0.00935 
C6    1    0.061324    0.011674    0.667724    11.00000    0.03859    0.02887 = 
         0.02205    0.00699    0.00484   -0.00379 
C7    1    0.088217    0.213080    0.650601    11.00000    0.01816    0.02082 = 
         0.02239    0.00299    0.00459    0.00321 
C8    1    0.185602    0.072994    0.578212    11.00000    0.02613    0.05259 = 
         0.03403   -0.00233    0.01038    0.01387 
C9    1    0.483316    0.086174    1.253240    10.50000    0.04049    0.01283 = 
         0.01696   -0.00041    0.00332   -0.00090 
C10   1    0.248396    0.219480    0.516970    10.50000    0.06041    0.08215 = 
         0.02366   -0.00416   -0.01134    0.04002 
O1    4    0.290449    0.213945    0.955020    11.00000    0.07264    0.03533 = 
         0.03175    0.01307    0.02947    0.02674 
H1A   2    0.305184    0.241694    0.992903    11.00000   -1.50000 
H1B   2    0.280085    0.195583    0.994848    11.00000   -1.50000 
O2    4    0.372490    0.226827    0.882552    11.00000    0.07076    0.02430 = 
         0.05981    0.00013    0.04715    0.00039 
H2    2    0.397150    0.218094    0.885592    11.00000   -1.50000 
C11   1    0.362994    0.307587    0.848842    11.00000    0.07120    0.07521 = 
         0.05865   -0.00416    0.02319    0.00801 
AFIX  23 
H11A  2    0.387208    0.342244    0.862305    11.00000   -1.20000 
H11B  2    0.341719    0.331755    0.875369    11.00000   -1.20000 
AFIX   0 
C12   1    0.348480    0.301267    0.751547    11.00000    0.04662    0.05653 = 
         0.07729    0.02217    0.00840   -0.00615 
AFIX  23 
H12A  2    0.327204    0.259601    0.739350    11.00000   -1.20000 
H12B  2    0.336207    0.353281    0.729811    11.00000   -1.20000 
AFIX   0 
O3    4    0.379611    0.281477    0.705081    11.00000    0.03199    0.03342 = 
         0.08661   -0.03467    0.02670   -0.00587 
C13   1    0.373070    0.251672    0.617927    11.00000    0.06461    0.05332 = 
         0.02969    0.01980    0.01214    0.00413 
part 1 
AFIX  23 
H13A  2    0.344314    0.237027    0.599672    21.00000   -1.20000 
H13B  2    0.378665    0.295780    0.580005    21.00000   -1.20000 
AFIX  23 
part 2 
H13C  2    0.360317    0.296515    0.581182   -21.00000   -1.20000 
H13D  2    0.400200    0.244653    0.604762   -21.00000   -1.20000 
AFIX   0 
PART 1 
C14   1    0.395595    0.187481    0.606108    21.00000    0.05012    0.04685 = 
         0.02496    0.01203    0.01282   -0.00067 
AFIX  13 
H14   2    0.423192    0.211111    0.612991    21.00000   -1.20000 
AFIX   0 
C15   1    0.400819    0.123590    0.682929    21.00000    0.03362    0.03590 = 
         0.02367    0.00405    0.00203   -0.00510 
AFIX 137 
H15A  2    0.418381    0.146213    0.734061    21.00000   -1.50000 
H15B  2    0.412864    0.074087    0.665800    21.00000   -1.50000 
H15C  2    0.374415    0.111307    0.696012    21.00000   -1.50000 
AFIX   0 
C16   1    0.391188    0.148137    0.529572    21.00000    0.06117    0.05534 = 
         0.02791    0.00953    0.01465   -0.01286 
AFIX 137 
H16A  2    0.362516    0.138822    0.506441    21.00000   -1.50000 
H16B  2    0.405292    0.096341    0.538189    21.00000   -1.50000 
H16C  2    0.402584    0.180915    0.488967    21.00000   -1.50000 
AFIX   0 
PART 2 
C14'  1    0.353169    0.188090    0.589145   -21.00000    0.05012    0.04685 = 
         0.02496    0.01203    0.01282   -0.00067 
AFIX  13 
H14'  2    0.324675    0.191679    0.596962   -21.00000   -1.20000 
AFIX   0 
C15'  1    0.374309    0.108199    0.632356   -21.00000    0.03362    0.03590 = 
         0.02367    0.00405    0.00203   -0.00510 
AFIX 137 
H15D  2    0.387564    0.080271    0.591233   -21.00000   -1.50000 
H15E  2    0.353967    0.072773    0.648703   -21.00000   -1.50000 
H15F  2    0.394381    0.122482    0.683673   -21.00000   -1.50000 
AFIX   0 
C16'  1    0.355065    0.182084    0.489968   -21.00000    0.06117    0.05534 = 
         0.02791    0.00953    0.01465   -0.01286 
AFIX 137 
H16D  2    0.353287    0.236220    0.464862   -21.00000   -1.50000 
H16E  2    0.332538    0.149295    0.459969   -21.00000   -1.50000 
H16F  2    0.380539    0.157037    0.483995   -21.00000   -1.50000 
AFIX   0 
PART 0 
O4    4    0.040624    0.220171    0.215892    11.00000    0.03606    0.06311 = 
         0.02401    0.02467   -0.00588   -0.01525 
H4    2    0.065691    0.216323    0.231663    11.00000   -1.50000 
C21   1    0.031233    0.306077    0.184987    11.00000    0.11544    0.05552 = 
         0.05226    0.01834    0.02966    0.02758 
AFIX  23 
H21A  2    0.055754    0.339844    0.198771    11.00000   -1.20000 
H21B  2    0.010423    0.329711    0.213273    11.00000   -1.20000 
AFIX   0 
C22   1    0.015697    0.301989    0.086052    11.00000    0.03735    0.05977 = 
         0.06646    0.01062    0.01876    0.00388 
part 1 
AFIX  23 
H22A  2   -0.009853    0.332216    0.080851    41.00000   -1.20000 
H22B  2    0.007219    0.244869    0.079807    41.00000   -1.20000 
AFIX  23 
part 2 
H22C  2   -0.011216    0.276360    0.073638   -41.00000   -1.20000 
H22D  2    0.012916    0.357294    0.062256   -41.00000   -1.20000 
AFIX   0 
PART 1 
O5    4    0.026030    0.319207   -0.014019    41.00000    0.03562    0.04775 = 
         0.06193    0.01951    0.02161    0.01701 
C23   1    0.047954    0.257366   -0.040197    41.00000    0.03562    0.04775 = 
         0.06193    0.01951    0.02161    0.01701 
AFIX  23 
H23A  2    0.069000    0.238558    0.008365    41.00000   -1.20000 
H23B  2    0.061148    0.275809   -0.087050    41.00000   -1.20000 
AFIX   0 
C24   1    0.019630    0.192566   -0.070430    41.00000    0.03562    0.04775 = 
         0.06193    0.01951    0.02161    0.01701 
AFIX  13 
H24   2   -0.007895    0.201303   -0.058362    41.00000   -1.20000 
AFIX   0 
C25   1    0.043250    0.110977   -0.022269    41.00000    0.02896    0.02945 = 
         0.05406   -0.00091    0.01623   -0.00204 
AFIX 137 
H25A  2    0.072144    0.115060   -0.021682    41.00000   -1.50000 
H25B  2    0.032402    0.062522   -0.053910    41.00000   -1.50000 
H25C  2    0.039003    0.107687    0.036918    41.00000   -1.50000 
AFIX   0 
PART 2 
O5'   4    0.043620    0.255367    0.043781   -41.00000    0.03562    0.04775 = 
         0.06193    0.01951    0.02161    0.01701 
C23'  1    0.019135    0.251790   -0.038100   -41.00000    0.03562    0.04775 = 
         0.06193    0.01951    0.02161    0.01701 
AFIX  23 
H23C  2    0.024920    0.296450   -0.075149   -41.00000   -1.20000 
H23D  2   -0.009796    0.252416   -0.035470   -41.00000   -1.20000 
AFIX   0 
C24'  1    0.031347    0.174054   -0.067493   -41.00000    0.03562    0.04775 = 
         0.06193    0.01951    0.02161    0.01701 
AFIX  13 
H24'  2    0.014507    0.129894   -0.050313   -41.00000   -1.20000 
AFIX   0 
C25'  1    0.080858    0.148303   -0.043578   -41.00000    0.02896    0.02945 = 
         0.05406   -0.00091    0.01623   -0.00204 
AFIX 137 
H25D  2    0.096481    0.187103   -0.070009   -41.00000   -1.50000 
H25E  2    0.084300    0.094259   -0.065884   -41.00000   -1.50000 
H25F  2    0.090342    0.148699    0.018951   -41.00000   -1.50000 
AFIX   0 
PART 0 
C26   1    0.020811    0.186090   -0.175572    11.00000    0.06336    0.06852 = 
         0.06261    0.01197    0.02044    0.00518 
part 1 
AFIX  33 
H26A  2    0.002445    0.143472   -0.202105    41.00000   -1.50000 
H26B  2    0.012428    0.237620   -0.203656    41.00000   -1.50000 
H26C  2    0.048250    0.173401   -0.182262    41.00000   -1.50000 
AFIX  33 
part 2 
H26D  2    0.027869    0.136797   -0.203152   -41.00000   -1.50000 
H26E  2   -0.007987    0.197106   -0.194863   -41.00000   -1.50000 
H26F  2    0.036451    0.231335   -0.191282   -41.00000   -1.50000 
AFIX   0 
PART 1 
O6    4    0.184712    0.128154    0.988111    31.00000    0.09373    0.11573 = 
         0.03925   -0.00026    0.01452   -0.06079 
AFIX  83 
H6    2    0.202151    0.164450    1.000884    31.00000   -1.50000 
AFIX   0 
C32   1    0.185250    0.100176    0.909096    31.00000    0.04307    0.04875 = 
         0.03926    0.01886   -0.00353   -0.00593 
AFIX  23 
H32A  2    0.165166    0.056258    0.896676    31.00000   -1.20000 
H32B  2    0.212023    0.075744    0.910602    31.00000   -1.20000 
AFIX   0 
C33   1    0.177924    0.152309    0.842103    31.00000    0.03415    0.03685 = 
         0.02428    0.00232    0.00453   -0.00059 
AFIX  23 
H33A  2    0.151746    0.179376    0.840311    31.00000   -1.20000 
H33B  2    0.176316    0.122369    0.787574    31.00000   -1.20000 
AFIX   0 
O7    4    0.209393    0.211782    0.850462    31.00000    0.02490    0.03384 = 
         0.02197    0.00577   -0.00108   -0.00045 
C34   1    0.201498    0.261317    0.776551    31.00000    0.02913    0.02741 = 
         0.01604    0.00149   -0.00173    0.00552 
AFIX  23 
H34A  2    0.175184    0.288480    0.772484    31.00000   -1.20000 
H34B  2    0.200204    0.227911    0.724396    31.00000   -1.20000 
AFIX   0 
C35   1    0.231017    0.369528    0.696552    31.00000    0.04376    0.03596 = 
         0.03699    0.00091    0.00872   -0.00632 
AFIX 137 
H35A  2    0.205772    0.400072    0.686963    31.00000   -1.50000 
H35B  2    0.229740    0.328899    0.651288    31.00000   -1.50000 
H35C  2    0.253506    0.406291    0.695247    31.00000   -1.50000 
AFIX   0 
C36   1    0.233512    0.382343    0.850012    31.00000    0.04376    0.03596 = 
         0.03699    0.00091    0.00872   -0.00632 
AFIX 137 
H36A  2    0.209699    0.416423    0.832138    31.00000   -1.50000 
H36B  2    0.257590    0.416309    0.863769    31.00000   -1.50000 
H36C  2    0.230727    0.351203    0.900952    31.00000   -1.50000 
AFIX   0 
PART 2 
O6'   4    0.264862    0.380738    0.859774   -31.00000    0.09373    0.11573 = 
         0.03925   -0.00026    0.01452   -0.06079 
AFIX  83 
H6'   2    0.266830    0.355582    0.906353   -31.00000   -1.50000 
AFIX   0 
C32'  1    0.205259    0.326082    0.805780   -31.00000    0.04307    0.04875 = 
         0.03926    0.01886   -0.00353   -0.00593 
AFIX  23 
H32C  2    0.183000    0.319884    0.755273   -31.00000   -1.20000 
H32D  2    0.201018    0.377021    0.835165   -31.00000   -1.20000 
AFIX   0 
O7'   4    0.204979    0.262745    0.860815   -31.00000    0.02490    0.03384 = 
         0.02197    0.00577   -0.00108   -0.00045 
C33'  1    0.194269    0.184735    0.819716   -31.00000    0.03415    0.03685 = 
         0.02428    0.00232    0.00453   -0.00059 
AFIX  23 
H33C  2    0.168399    0.189951    0.778137   -31.00000   -1.20000 
H33D  2    0.215136    0.168912    0.787292   -31.00000   -1.20000 
AFIX   0 
C34'  1    0.190675    0.123831    0.879570   -31.00000    0.02913    0.02741 = 
         0.01604    0.00149   -0.00173    0.00552 
AFIX  13 
H34C  2    0.214920    0.123946    0.927311   -31.00000   -1.20000 
AFIX   0 
C35'  1    0.185508    0.039333    0.835949   -31.00000    0.04376    0.03596 = 
         0.03699    0.00091    0.00872   -0.00632 
AFIX 137 
H35D  2    0.166643    0.043275    0.780574   -31.00000   -1.50000 
H35E  2    0.174978    0.001324    0.873234   -31.00000   -1.50000 
H35F  2    0.211654    0.020267    0.826610   -31.00000   -1.50000 
AFIX   0 
C36'  1    0.147641    0.141394    0.920540   -31.00000    0.04376    0.03596 = 
         0.03699    0.00091    0.00872   -0.00632 
AFIX 137 
H36D  2    0.148873    0.195615    0.945355   -31.00000   -1.50000 
H36E  2    0.145936    0.101532    0.965214   -31.00000   -1.50000 
H36F  2    0.123832    0.136946    0.874171   -31.00000   -1.50000 
AFIX   0 
PART 0 
C31   1    0.237164    0.328861    0.782158    11.00000    0.04875    0.05268 = 
         0.04198    0.00974    0.00808    0.00352 
part 1 
AFIX  13 
H31A  2    0.264113    0.302016    0.794886    31.00000   -1.20000 
AFIX  23 
part 2 
H31B  2    0.234429    0.356769    0.726161   -31.00000   -1.20000 
H31C  2    0.248358    0.274317    0.777593   -31.00000   -1.20000 
AFIX   0 
HKLF 4 
  
REM  test1 in C2/c 
REM R1 =  0.0967 for   10108 Fo > 4sig(Fo)  and  0.1212 for all   13296 data 
REM    478 parameters refined using    205 restraints 
  
END 
  
WGHT      0.0602    587.1697 
  
REM Instructions for potential hydrogen bonds 
HTAB O1 O6_$1 
HTAB O1 O7'_$1 
HTAB O2 O5'_$2 
HTAB C11 O6_$1 
HTAB C12 N1 
HTAB C14' N10 
HTAB O4 O3_$2 
HTAB C23 O2_$2 
HTAB O6 O1_$1 
HTAB O6' O1 
  
REM Highest difference peak  4.314,  deepest hole -7.405,  1-sigma level  0.320 
Q1    1   0.3527  0.3690  0.8211  11.00000  0.05    4.31 
Q2    1   0.0192  0.3801  0.0483  11.00000  0.05    4.15 
Q3    1   0.0382  0.2389  0.0266  11.00000  0.05    3.97 
Q4    1   0.0178  0.4597  0.0058  11.00000  0.05    3.66 
Q5    1   0.1094  0.1473  0.0270  11.00000  0.05    3.52 
Q6    1  -0.0171  0.3619  0.0803  11.00000  0.05    3.51 
Q7    1   0.0512  0.2771  0.0574  11.00000  0.05    3.45 
Q8    1   0.0929  0.0951  0.0345  11.00000  0.05    3.30 
Q9    1   0.3505  0.4084  0.7421  11.00000  0.05    3.11 
Q10   1   0.0949  0.0639  0.5827  11.00000  0.05    2.82 
Q11   1   0.3422  0.3431  0.6656  11.00000  0.05    2.78 
Q12   1   0.1421  0.1664  0.9395  11.00000  0.05    2.66 
Q13   1   0.0375  0.1619 -0.0129  11.00000  0.05    2.64 
Q14   1   0.0170  0.1408  0.2617  11.00000  0.05    2.63 
Q15   1   0.3102  0.3388  0.7742  11.00000  0.05    2.60 
Q16   1   0.2776  0.3508  0.8578  11.00000  0.05    2.44 
Q17   1   0.1555  0.1214  0.8717  11.00000  0.05    2.43 
Q18   1   0.2179  0.3952  0.8351  11.00000  0.05    2.33 
Q19   1   0.4206  0.1413  1.2619  11.00000  0.05    2.33 
Q20   1   0.3789  0.1972  0.5815  11.00000  0.05    2.23 
; 
_shelx_res_checksum   19145 
  
_shelx_hkl_file 
; 
   2   0   0   -0.01    0.03 
   2   0   0   -0.02    0.01 
   4   0   0    5.85    0.29 
   4   0   0    5.97    0.21 
   6   0   0  488.03    6.59 
   6   0   0  487.18    6.15 
   8   0   0  158.08    2.72 
   8   0   0  163.85    2.32 
  10   0   0    2.02    0.38 
  10   0   0    2.47    0.29 
  12   0   0 1511.42   19.76 
  12   0   0 1521.71   19.05 
  14   0   0   30.99    1.24 
  14   0   0   27.63    0.83 
  16   0   0   74.13    2.10 
  16   0   0   73.67    1.53 
  18   0   0  429.97    6.09 
  18   0   0  443.20    7.19 
  20   0   0  126.68    3.20 
  20   0   0  129.74    2.41 
  22   0   0    2.13    0.40 
  22   0   0    2.01    0.60 
  24   0   0 1603.74   22.31 
  24   0   0 1601.21   20.31 
  26   0   0    7.68    1.06 
  26   0   0    8.90    0.72 
  28   0   0   32.07    1.88 
  30   0   0  123.21    3.83 
  32   0   0   45.44    2.47 
  34   0   0    0.64    0.67 
  36   0   0  239.41    6.25 
  38   0   0   22.87    2.26 
  40   0   0    2.99    1.10 
  42   0   0   17.00    2.15 
  44   0   0   32.46    2.70 
  46   0   0    0.62    0.76 
   3  -1   0  378.51    4.86 
   3   1   0  379.83    4.98 
   5  -1   0    1.49    0.19 
   5   1   0    1.91    0.24 
   7  -1   0    0.18    0.17 
   7   1   0    0.05    0.19 
   7   1   0    0.27    0.09 
   9  -1   0   13.09    0.56 
   9   1   0   14.22    0.38 
   9   1   0   14.36    0.69 
  11   1   0   23.84    0.98 
  11  -1   0   25.35    0.82 
  11   1   0   25.09    0.59 
  13   1   0   36.21    1.30 
  13   1   0   38.00    0.84 
  13  -1   0   39.85    1.37 
  13  -1   0   37.76    1.06 
  15  -1   0   20.55    1.05 
  15   1   0   20.47    1.06 
  15   1   0   20.76    0.64 
  15  -1   0   23.26    0.85 
  17   1   0    0.81    0.37 
  17  -1   0    1.51    0.34 
  17  -1   0    1.59    0.42 
  17   1   0    1.61    0.29 
  19  -1   0    0.51    0.39 
  19   1   0    0.19    0.22 
  19   1   0    0.13    0.39 
  19  -1   0   -0.15    0.27 
  21  -1   0  685.53    9.43 
  21  -1   0  699.21   10.68 
  21   1   0  676.35    8.98 
  21   1   0  678.07   10.59 
  23   1   0   23.56    1.47 
  23   1   0   26.03    0.91 
  23  -1   0   25.76    1.10 
  23  -1   0   24.32    1.44 
  25   1   0   19.33    0.85 
  25   1   0   21.59    1.51 
  25  -1   0   20.82    1.06 
  25  -1   0   21.80    1.46 
  27  -1   0   12.40    1.35 
  27  -1   0   12.41    0.87 
  27   1   0   10.88    1.27 
  29  -1   0    9.26    1.31 
  29   1   0    9.55    1.29 
  31  -1   0    4.10    1.01 
  31   1   0    3.27    0.99 
  33   1   0  211.69    5.56 
  33  -1   0  209.53    5.53 
  35  -1   0    6.76    1.26 
  35   1   0    3.90    0.99 
  37   1   0   14.45    1.88 
  37  -1   0   15.36    1.94 
  39   1   0    5.22    1.19 
  39  -1   0    5.01    1.32 
  41   1   0    3.19    1.16 
  41  -1   0    1.91    1.06 
  43  -1   0    0.64    0.92 
  43   1   0    1.01    0.87 
  45  -1   0   48.31    3.31 
  45   1   0   57.67    3.48 
   0   2   0    3.38    0.30 
   0   2   0    2.81    0.33 
   0  -2   0    2.96    0.33 
   2   2   0   10.71    0.39 
   2   2   0   10.33    0.34 
   2  -2   0   10.89    0.41 
  -2  -2   0   10.52    0.32 
   4  -2   0    5.07    0.32 
  -4  -2   0    5.80    0.20 
   4   2   0    5.33    0.34 
   6  -2   0  157.67    2.58 
   6   2   0  158.79    2.67 
   8  -2   0   51.88    1.23 
  10  -2   0   11.93    0.63 
  10   2   0   10.97    0.68 
  12  -2   0  406.06    5.87 
  12   2   0  412.60    6.30 
  14   2   0    8.02    0.67 
  14   2   0    7.37    0.29 
  14  -2   0    7.10    0.57 
  16   2   0    4.26    0.28 
  16  -2   0    4.08    0.56 
  16   2   0    4.02    0.62 
  16  -2   0    4.59    0.53 
  18   2   0    2.10    0.51 
  18  -2   0    1.64    0.48 
  18   2   0    2.37    0.26 
  18  -2   0    1.86    0.42 
  20   2   0    0.22    0.38 
  20  -2   0    0.51    0.38 
  20  -2   0    0.36    0.32 
  20   2   0    0.27    0.18 
  22  -2   0    0.55    0.42 
  22   2   0    0.76    0.22 
  22  -2   0    1.01    0.38 
  22   2   0    0.71    0.43 
  24  -2   0    9.14    1.09 
  24  -2   0   10.35    0.88 
  24   2   0    9.09    0.60 
  24   2   0    8.03    1.05 
  26  -2   0    2.74    0.71 
  26  -2   0    4.00    0.67 
  26   2   0    3.19    0.74 
  28  -2   0    1.04    0.46 
  28  -2   0   -0.16    0.49 
  28   2   0    0.50    0.56 
  30  -2   0   15.69    1.61 
  30   2   0   14.03    1.52 
  32   2   0   11.55    1.51 
  32  -2   0   12.76    1.59 
  34  -2   0    1.91    0.77 
  34   2   0    0.65    0.68 
  36  -2   0   24.87    2.08 
  36   2   0   22.02    2.18 
  38   2   0    1.48    0.92 
  38  -2   0    0.36    0.78 
  40   2   0   -0.52    0.58 
  40  -2   0    0.32    0.68 
  42   2   0    3.48    1.24 
  42  -2   0    3.02    1.16 
  44   2   0    2.34    1.18 
  44  -2   0    2.29    1.18 
  46   2   0    1.01    0.86 
  46  -2   0    1.61    1.02 
  -1   3   0    0.18    0.14 
   1   3   0   -0.02    0.10 
   1   3   0    0.09    0.11 
  -1  -3   0    0.13    0.13 
   1  -3   0    0.20    0.16 
   3   3   0  127.10    2.15 
   3   3   0  125.79    1.97 
   3  -3   0  127.28    2.18 
  -3  -3   0  127.65    1.93 
   5  -3   0   19.99    0.75 
   5   3   0   21.71    0.77 
  -5  -3   0   21.21    0.52 
  -7  -3   0   67.55    1.01 
   7  -3   0   67.36    1.53 
   7   3   0   67.45    1.55 
   9   3   0  153.80    2.85 
   9  -3   0  152.01    2.74 
  11  -3   0    1.84    0.37 
  11   3   0    1.84    0.37 
  13  -3   0   83.37    1.95 
  13   3   0   86.32    2.17 
  15  -3   0   51.08    1.52 
  15   3   0   53.34    1.74 
  17  -3   0    1.98    0.44 
  17   3   0    1.89    0.49 
  19   3   0   10.90    0.93 
  19  -3   0   11.25    0.82 
  21  -3   0  120.53    2.77 
  21  -3   0  122.99    3.29 
  21   3   0  129.24    3.31 
  23  -3   0    1.69    0.51 
  23  -3   0    1.02    0.47 
  23   3   0    1.97    0.62 
  25   3   0   12.67    1.36 
  25  -3   0   15.55    1.36 
  25  -3   0   14.73    1.07 
  27  -3   0   47.26    2.21 
  27   3   0   41.39    2.10 
  27  -3   0   47.75    1.78 
  29  -3   0    0.63    0.52 
  29   3   0   -0.10    0.55 
  29  -3   0   -0.45    0.45 
  31   3   0    3.25    0.94 
  31  -3   0    3.05    0.98 
  31  -3   0    2.59    0.83 
  33   3   0   33.11    2.14 
  33  -3   0   33.07    2.18 
  35   3   0    0.72    0.76 
  35  -3   0   -0.30    0.57 
  37   3   0   17.07    1.90 
  37  -3   0   17.76    1.96 
  39  -3   0    2.65    1.07 
  39   3   0    1.80    0.95 
  41   3   0   -0.52    0.76 
  41  -3   0    1.26    0.82 
  43  -3   0   -0.40    0.78 
  43   3   0   -0.06    0.81 
  45  -3   0   11.21    1.93 
  45   3   0    7.19    1.53 
   0   4   0 3975.39   51.10 
   0  -4   0 3849.64   50.99 
   0   4   0 3988.86   49.10 
   2   4   0   49.49    1.19 
  -2   4   0   49.30    1.20 
   2  -4   0   47.17    1.21 
  -2  -4   0   51.47    1.13 
   2   4   0   48.63    1.05 
   4   4   0    3.23    0.34 
   4   4   0    3.70    0.42 
  -4  -4   0    4.00    0.34 
   4  -4   0    2.91    0.39 
   6   4   0   48.13    1.32 
  -6  -4   0   49.50    0.99 
   6  -4   0   51.13    1.37 
   6   4   0   48.16    1.18 
   8   4   0   32.73    1.12 
  -8  -4   0   31.96    0.68 
  10   4   0    3.89    0.53 
  10  -4   0    3.65    0.48 
  12   4   0 2843.49   36.25 
  12  -4   0 2877.56   38.44 
  14  -4   0    6.51    0.69 
  14   4   0    5.40    0.65 
  16  -4   0   28.00    1.20 
  18  -4   0   66.27    1.96 
  20  -4   0   31.25    1.36 
  20   4   0   32.85    1.61 
  22   4   0    0.69    0.51 
  22  -4   0    0.69    0.42 
  24   4   0  529.63    9.23 
  24  -4   0  558.09    8.52 
  24  -4   0  549.50    9.38 
  26  -4   0    0.38    0.45 
  26  -4   0    0.54    0.46 
  26   4   0   -0.15    0.46 
  28  -4   0    9.42    1.02 
  28  -4   0   10.37    1.33 
  28   4   0    7.94    1.13 
  30  -4   0   18.42    1.34 
  30  -4   0   17.64    1.56 
  30   4   0   17.27    1.71 
  32  -4   0   37.53    2.00 
  32  -4   0   34.26    2.18 
  32   4   0   38.19    2.26 
  34   4   0    7.62    1.33 
  34  -4   0    5.66    1.14 
  36   4   0  222.07    6.01 
  36  -4   0  219.52    6.01 
  38  -4   0    0.93    0.88 
  38   4   0    0.33    0.87 
  40   4   0    3.22    1.14 
  40  -4   0    2.81    1.14 
  42  -4   0    0.05    0.82 
  42   4   0    0.04    0.94 
  44  -4   0   10.40    1.83 
  44   4   0   13.15    1.98 
  46   4   0    1.07    1.00 
  -1  -5   0    0.17    0.23 
   1   5   0   -0.34    0.17 
   1  -5   0   -0.02    0.25 
   1   5   0    0.21    0.18 
  -1   5   0    0.03    0.17 
  -1   5   0   -0.05    0.19 
   3   5   0  151.19    2.47 
  -3  -5   0  147.73    2.52 
   3   5   0  152.00    2.71 
   3  -5   0  150.24    2.77 
   5  -5   0   20.59    0.91 
   5   5   0   20.97    0.88 
   5   5   0   20.37    0.76 
  -5  -5   0   21.09    0.72 
   7   5   0    3.55    0.42 
   7  -5   0    3.60    0.52 
  -7  -5   0    4.12    0.36 
   7   5   0    3.08    0.43 
   9   5   0  419.81    6.45 
  -9  -5   0  426.83    5.55 
   9  -5   0  422.47    6.42 
  11   5   0   27.41    1.20 
 -11  -5   0   28.94    0.62 
  11  -5   0   27.83    1.19 
  13   5   0   21.85    1.13 
  13  -5   0   22.89    1.10 
  15   5   0   42.50    1.61 
  15  -5   0   39.96    1.50 
  17   5   0   19.36    1.19 
  17  -5   0   20.40    1.15 
  19  -5   0   24.00    1.28 
  19   5   0   24.92    1.38 
  21  -5   0  499.23    7.98 
  21   5   0  514.07    8.57 
  23   5   0    9.78    1.11 
  23  -5   0   11.21    1.07 
  25  -5   0   53.82    2.05 
  25   5   0   54.81    2.32 
  27   5   0    1.34    0.71 
  27  -5   0    0.88    0.55 
  27  -5   0    0.52    0.55 
  29  -5   0    2.36    0.73 
  29  -5   0    1.22    0.59 
  29   5   0    0.75    0.66 
  31  -5   0    5.42    0.96 
  31  -5   0    4.37    1.08 
  31   5   0    5.19    1.07 
  33   5   0  218.38    5.63 
  33  -5   0  196.28    5.02 
  33  -5   0  196.96    5.48 
  35  -5   0   11.34    1.57 
  35   5   0   11.46    1.58 
  37   5   0   19.90    2.11 
  37  -5   0   16.13    1.90 
  39   5   0    0.63    0.80 
  39  -5   0    0.78    0.91 
  41  -5   0    0.72    0.81 
  41   5   0   -0.93    0.77 
  43  -5   0    1.54    1.15 
  43   5   0    4.38    1.34 
  45   5   0   58.64    3.51 
  45  -5   0   59.85    4.06 
   0   6   0 1923.74   25.48 
   0   6   0 1959.81   23.44 
   0  -6   0 1918.29   25.27 
   2  -6   0    2.21    0.43 
  -2   6   0    1.61    0.37 
   2   6   0    2.62    0.41 
  -2  -6   0    1.68    0.34 
   2   6   0    2.28    0.35 
   4   6   0   10.48    0.67 
  -4  -6   0   11.10    0.63 
   4  -6   0   10.62    0.76 
   4   6   0   11.29    0.60 
  -6  -6   0  707.81    9.32 
   6   6   0  697.81    9.28 
   6   6   0  706.55    9.88 
   6  -6   0  715.19    9.92 
   8  -6   0    0.80    0.36 
   8   6   0    0.89    0.33 
   8   6   0    1.05    0.32 
  -8  -6   0    0.82    0.24 
 -10  -6   0   -0.10    0.16 
  10   6   0    0.08    0.27 
  10   6   0   -0.27    0.23 
  10  -6   0    0.47    0.38 
  12  -6   0 1015.76   13.83 
 -12  -6   0 1000.76   12.49 
  12   6   0 1002.92   13.98 
  14  -6   0   16.93    1.08 
  14   6   0   18.61    1.10 
  16   6   0    1.29    0.48 
  16  -6   0    0.54    0.39 
  18  -6   0  378.46    6.44 
  18   6   0  371.79    6.63 
  20  -6   0   14.01    1.10 
  20   6   0   14.17    1.20 
  22   6   0    8.89    1.08 
  22  -6   0    8.25    0.96 
  24   6   0  495.61    8.84 
  24  -6   0  521.15    8.44 
  26  -6   0   10.83    1.15 
  26   6   0   12.20    1.39 
  28  -6   0    7.03    1.15 
  28   6   0    7.91    1.16 
  28  -6   0    7.70    1.04 
  30  -6   0  114.83    3.92 
  30  -6   0  107.53    3.28 
  30   6   0  119.19    3.88 
  32   6   0   21.00    1.85 
  32  -6   0   19.65    1.76 
  32  -6   0   20.49    1.57 
  34   6   0    0.23    0.69 
  34  -6   0    0.57    0.68 
  34  -6   0    0.34    0.66 
  36   6   0   86.52    3.70 
  36  -6   0   91.18    3.84 
  38   6   0   10.53    1.63 
  38  -6   0    7.08    1.41 
  40  -6   0    0.15    0.68 
  40   6   0    1.12    0.95 
  42   6   0   12.18    1.88 
  42  -6   0   13.36    1.89 
  44   6   0   11.26    1.83 
  44  -6   0   12.46    1.94 
  -1   7   0   61.38    1.69 
   1   7   0   63.68    1.55 
   1   7   0   63.89    1.72 
  -1   7   0   63.24    1.57 
  -1  -7   0   66.03    1.71 
   1  -7   0   64.47    1.75 
   3   7   0  192.73    3.51 
   3   7   0  193.15    3.21 
   3  -7   0  183.81    3.53 
  -3  -7   0  192.83    3.36 
  -5  -7   0  136.59    2.57 
   5   7   0  136.23    2.83 
   5  -7   0  133.99    2.91 
   5   7   0  132.11    2.53 
   7   7   0   31.91    1.27 
   7   7   0   33.24    1.17 
   7  -7   0   35.15    1.40 
  -7  -7   0   33.17    1.08 
   9  -7   0    0.40    0.38 
   9   7   0    0.01    0.29 
  -9  -7   0    0.93    0.28 
   9   7   0    0.46    0.37 
  11   7   0   18.78    1.08 
  11  -7   0   17.00    1.09 
  11   7   0   18.87    0.96 
 -11  -7   0   18.11    0.70 
 -13  -7   0   17.66    0.62 
  13   7   0   16.68    1.06 
  13   7   0   18.02    1.01 
  13  -7   0   17.12    1.13 
  15   7   0  156.77    3.57 
  15  -7   0  148.11    3.47 
  17   7   0   37.90    1.71 
  17  -7   0   39.94    1.76 
  19   7   0    5.72    0.90 
  19  -7   0    4.32    0.73 
  21  -7   0    1.42    0.53 
  21   7   0    0.11    0.40 
  23  -7   0   12.28    1.24 
  23   7   0   12.53    1.30 
  25  -7   0   27.71    1.66 
  25   7   0   35.17    1.96 
  27   7   0   66.04    2.77 
  27  -7   0   71.85    2.64 
  29  -7   0   22.61    1.61 
  29   7   0   18.87    1.69 
  31  -7   0   -0.05    0.63 
  31   7   0    0.32    0.63 
  31  -7   0    0.05    0.61 
  33  -7   0    7.10    1.14 
  33   7   0    6.64    1.19 
  33  -7   0    6.76    1.23 
  35  -7   0   -0.49    0.76 
  35  -7   0    0.42    0.80 
  35   7   0    0.02    0.68 
  37  -7   0    5.28    1.22 
  37   7   0    5.06    1.26 
  39   7   0   18.86    2.08 
  39  -7   0   20.09    2.18 
  41   7   0    1.88    1.04 
  41  -7   0    2.96    1.14 
  43   7   0    0.45    0.90 
  43  -7   0    1.03    1.03 
  45   7   0    5.31    1.57 
   0  -8   0 1358.82   17.74 
   0   8   0 1340.06   17.02 
   0   8   0 1358.74   17.97 
   2   8   0    2.64    0.43 
  -2   8   0    1.33    0.41 
   2   8   0    1.64    0.40 
  -2  -8   0    1.83    0.43 
   2  -8   0    2.92    0.54 
  -4  -8   0   13.12    0.79 
   4   8   0   11.46    0.82 
   4  -8   0   11.74    0.89 
   4   8   0   13.36    0.76 
   6   8   0   15.32    0.83 
  -6  -8   0   16.96    0.85 
   6  -8   0   15.12    0.97 
   6   8   0   16.41    0.97 
   8  -8   0    2.03    0.53 
  -8  -8   0    2.07    0.39 
   8   8   0    1.41    0.42 
   8   8   0    2.33    0.44 
  10   8   0    0.21    0.33 
  10   8   0   -0.03    0.28 
  10  -8   0   -0.15    0.36 
 -10  -8   0   -0.15    0.22 
  12  -8   0  210.70    4.35 
  12   8   0  208.78    3.92 
  12   8   0  215.26    4.31 
 -12  -8   0  210.98    3.40 
  14   8   0    0.01    0.35 
 -14  -8   0    0.18    0.19 
  14  -8   0   -0.33    0.36 
  14   8   0   -0.40    0.37 
  16   8   0    0.56    0.41 
  16  -8   0    0.61    0.49 
  16   8   0   -0.01    0.44 
  18   8   0   67.22    2.40 
  18   8   0   66.60    2.23 
  18  -8   0   81.76    2.56 
  20  -8   0   11.36    1.22 
  20   8   0   10.95    1.17 
  22   8   0    0.36    0.51 
  22  -8   0   -0.12    0.49 
  24   8   0  259.93    5.74 
  24  -8   0  260.08    5.53 
  26  -8   0    1.97    0.78 
  26   8   0    2.16    0.77 
  28   8   0    6.09    1.15 
  28  -8   0    6.08    1.04 
  30   8   0   23.49    1.85 
  30  -8   0   21.51    1.68 
  32  -8   0    2.16    0.87 
  32  -8   0    1.84    0.89 
  32   8   0    2.06    0.84 
  34  -8   0    5.97    1.25 
  34   8   0    7.95    1.35 
  34  -8   0    8.41    1.28 
  36   8   0   59.63    3.10 
  36  -8   0   56.88    3.07 
  38   8   0    1.03    0.87 
  38  -8   0    0.18    0.85 
  40   8   0    3.32    1.09 
  40  -8   0    6.37    1.52 
  42   8   0    0.35    0.82 
  42  -8   0    0.69    0.85 
  44   8   0    4.16    1.33 
  -1  -9   0   27.08    1.25 
   1   9   0   28.68    1.29 
  -1   9   0   27.53    1.27 
   1   9   0   26.16    1.10 
   1  -9   0   26.36    1.27 
  -3  -9   0  453.49    7.02 
   3   9   0  462.06    6.72 
   3  -9   0  465.72    7.33 
   3   9   0  457.68    7.23 
   5  -9   0    1.73    0.50 
   5   9   0    2.17    0.47 
   7   9   0   32.51    1.42 
   7  -9   0   31.53    1.50 
   7   9   0   33.54    1.28 
  -7  -9   0   34.49    1.28 
   9   9   0  140.16    3.23 
   9   9   0  130.26    2.84 
  -9  -9   0  135.31    2.73 
   9  -9   0  134.88    3.31 
  11   9   0   15.36    1.11 
 -11  -9   0   16.22    0.83 
  11   9   0   15.63    0.99 
  11  -9   0   15.63    1.16 
  13   9   0  102.05    2.85 
  13   9   0  104.49    2.61 
 -13  -9   0   99.81    2.09 
  13  -9   0   96.53    2.87 
  15   9   0   47.25    1.93 
 -15  -9   0   48.52    1.25 
  15  -9   0   52.49    2.11 
  15   9   0   47.16    1.78 
  17   9   0   12.64    1.03 
  17  -9   0   11.44    1.27 
  17   9   0   10.32    1.11 
  19   9   0   24.53    1.56 
  19  -9   0   21.66    1.55 
  19   9   0   22.67    1.37 
  21   9   0  281.22    5.90 
  21   9   0  280.41    5.51 
  21  -9   0  277.82    5.83 
  23  -9   0    0.16    0.59 
  23   9   0    0.04    0.53 
  23   9   0   -0.29    0.51 
  25  -9   0   31.05    1.92 
  25   9   0   31.49    2.00 
  27  -9   0   16.17    1.65 
  27   9   0   11.55    1.43 
  29  -9   0    1.87    0.84 
  29   9   0    2.67    0.92 
  31   9   0   19.51    1.96 
  31  -9   0   17.17    1.73 
  33  -9   0  132.98    4.15 
  33   9   0  130.63    4.43 
  33  -9   0  131.97    4.59 
  35  -9   0    1.37    0.85 
  35  -9   0    0.42    0.79 
  35   9   0    0.90    0.84 
  37  -9   0   48.60    3.00 
  37   9   0   50.18    2.87 
  39  -9   0   -1.02    0.62 
  39   9   0   -0.17    0.78 
  41   9   0   -0.37    0.75 
  41  -9   0    0.38    0.88 
  43   9   0    9.48    1.72 
   0  10   0 1718.06   22.55 
   0 -10   0 1655.95   22.21 
   0  10   0 1710.63   21.39 
   2  10   0   20.24    1.06 
  -2  10   0   17.22    1.15 
   2 -10   0   16.21    1.13 
   2  10   0   19.51    1.18 
  -2 -10   0   17.33    1.12 
  -4 -10   0    0.27    0.36 
   4  10   0    0.89    0.40 
   4  10   0    0.62    0.43 
   4 -10   0    0.88    0.42 
   6  10   0  461.03    6.97 
   6  10   0  467.50    7.56 
   6 -10   0  462.15    7.68 
  -6 -10   0  462.72    7.16 
   8  10   0   -0.26    0.38 
  -8 -10   0    0.42    0.36 
   8 -10   0    0.69    0.55 
   8  10   0    0.33    0.35 
 -10 -10   0    4.06    0.58 
  10 -10   0    2.99    0.66 
  10  10   0    3.80    0.76 
  10  10   0    4.45    0.68 
  12  10   0  827.27   12.41 
  12  10   0  830.60   11.65 
  12 -10   0  825.03   12.49 
 -12 -10   0  840.93   11.33 
  14  10   0    0.31    0.39 
 -14 -10   0    0.35    0.27 
  14 -10   0    0.15    0.46 
  14  10   0    0.31    0.47 
  16  10   0   32.01    1.55 
  16  10   0   36.22    1.80 
  16 -10   0   33.02    1.82 
  18  10   0  156.54    3.72 
  18  10   0  161.32    4.07 
  18 -10   0  164.47    4.19 
  20  10   0    1.63    0.68 
  20 -10   0    2.06    0.79 
  20  10   0    1.28    0.59 
  22 -10   0    1.63    0.75 
  22  10   0    1.81    0.68 
  22  10   0    1.19    0.73 
  24  10   0  332.00    6.54 
  24 -10   0  346.86    7.00 
  24  10   0  334.46    7.00 
  26 -10   0   15.93    1.61 
  26  10   0   18.00    1.48 
  26  10   0   15.14    1.58 
  28  10   0    3.24    0.90 
  28  10   0    2.76    0.88 
  28 -10   0    5.09    1.05 
  30  10   0   58.97    2.69 
  30  10   0   67.01    3.04 
  30 -10   0   58.14    2.79 
  32  10   0   15.51    1.72 
  32  10   0   14.22    1.70 
  32 -10   0   14.66    1.66 
  34  10   0    1.69    0.97 
  34  10   0    1.36    0.75 
  34 -10   0    0.72    0.77 
  34 -10   0    1.44    0.85 
  36  10   0  108.99    4.25 
  36 -10   0  112.88    4.51 
  36  10   0  105.93    3.96 
  36 -10   0  107.95    3.93 
  38 -10   0    4.59    1.27 
  38  10   0    6.53    1.44 
  38  10   0    6.63    1.46 
  40 -10   0   -0.29    0.62 
  40  10   0   -0.05    0.85 
  40  10   0   -0.03    0.73 
  42  10   0    8.36    1.57 
  42  10   0    4.12    1.24 
  -1 -11   0   16.85    1.16 
   1 -11   0   16.72    1.19 
   1  11   0   16.72    1.10 
   1  11   0   16.94    1.02 
  -1  11   0   15.60    1.08 
   3  11   0   43.56    1.76 
  -3 -11   0   42.49    1.70 
   3 -11   0   38.11    1.74 
   3  11   0   41.01    1.54 
  -5 -11   0   35.95    1.55 
   5  11   0   35.61    1.64 
   5  11   0   34.96    1.42 
   5 -11   0   36.04    1.74 
   7  11   0   20.04    1.15 
   7  11   0   19.13    1.28 
   7 -11   0   17.59    1.32 
  -7 -11   0   19.09    1.16 
   9 -11   0    1.60    0.62 
   9  11   0    1.25    0.49 
  -9 -11   0    6.69    0.81 
   9  11   0    2.44    0.64 
  11 -11   0   18.15    1.38 
  11  11   0   20.22    1.33 
 -11 -11   0   16.48    1.00 
  11  11   0   17.30    1.11 
  13 -11   0    4.19    0.88 
 -13 -11   0    4.82    0.61 
  13  11   0    3.67    0.66 
  13  11   0    3.89    0.74 
  15 -11   0   29.09    1.73 
  15  11   0   30.06    1.54 
  15  11   0   28.77    1.65 
  17  11   0   32.85    1.65 
  17  11   0   31.32    1.80 
  17 -11   0   31.03    1.92 
  19 -11   0    0.39    0.64 
  19  11   0   -0.52    0.52 
  19  11   0   -0.07    0.48 
  21 -11   0   14.83    1.49 
  21  11   0   16.21    1.59 
  21  11   0   17.88    1.41 
  23 -11   0    7.96    1.30 
  23  11   0   10.23    1.36 
  23  11   0   10.88    1.26 
  25 -11   0    4.07    1.07 
  25  11   0    3.73    0.90 
  25  11   0    3.84    0.95 
  27 -11   0  111.62    3.82 
  27  11   0  103.42    3.45 
  27  11   0  106.15    3.72 
  29  11   0   31.21    2.20 
  29  11   0   33.66    2.07 
  29 -11   0   27.70    2.09 
  31  11   0    1.51    0.88 
  31  11   0    4.70    1.07 
  31 -11   0    2.98    1.02 
  33  11   0   26.69    2.18 
  33  11   0   25.15    1.95 
  33 -11   0   25.88    2.12 
  35 -11   0    3.54    1.12 
  35 -11   0    2.79    1.03 
  35  11   0    3.03    1.01 
  35  11   0    3.35    1.09 
  37 -11   0    1.15    0.92 
  37 -11   0    2.41    1.07 
  37  11   0    2.17    1.01 
  37  11   0    1.77    0.97 
  39 -11   0   30.23    2.61 
  39  11   0   29.85    2.47 
  39  11   0   30.52    2.35 
  41  11   0    3.63    1.18 
  41  11   0    5.92    1.33 
   0 -12   0   82.88    2.62 
   0  12   0   90.42    2.66 
  -2 -12   0    1.68    0.60 
   2 -12   0    0.37    0.49 
   2  12   0    0.90    0.50 
   2  12   0    0.72    0.45 
   4 -12   0    0.65    0.55 
   4  12   0    0.57    0.44 
  -4 -12   0    0.04    0.42 
   4  12   0    0.79    0.48 
   6 -12   0  319.62    6.21 
  -6 -12   0  321.64    5.77 
   6  12   0  329.95    5.58 
   6  12   0  316.07    6.00 
   8  12   0    8.17    0.96 
   8 -12   0    8.17    1.04 
   8  12   0   11.63    1.04 
  -8 -12   0    8.74    0.92 
 -10 -12   0    2.64    0.58 
  10  12   0    3.46    0.76 
  10 -12   0    1.74    0.68 
  10  12   0    3.34    0.67 
 -12 -12   0    0.76    0.43 
  12 -12   0    1.00    0.69 
  12  12   0    0.53    0.48 
  12  12   0    0.45    0.45 
  14  12   0    1.20    0.53 
  14 -12   0    0.53    0.67 
  14  12   0    0.52    0.51 
  16 -12   0    0.31    0.63 
  16  12   0    0.26    0.44 
  16  12   0   -0.22    0.54 
  18  12   0  195.23    4.44 
  18  12   0  196.77    4.83 
  18 -12   0  201.82    5.06 
  20 -12   0   -0.17    0.59 
  20  12   0    0.93    0.68 
  20  12   0    1.80    0.64 
  22  12   0    4.67    1.01 
  22  12   0    5.67    0.99 
  22 -12   0    4.33    1.09 
  24  12   0   19.60    1.54 
  24 -12   0   15.26    1.69 
  24  12   0   19.34    1.70 
  26  12   0    6.02    1.04 
  26 -12   0    5.21    1.20 
  26  12   0    8.67    1.42 
  28  12   0    2.70    0.90 
  28 -12   0    3.71    1.05 
  28  12   0    3.20    1.02 
  30  12   0   42.15    2.38 
  30  12   0   45.34    2.61 
  30 -12   0   40.99    2.54 
  32  12   0    0.01    0.65 
  32 -12   0   -0.13    0.78 
  32  12   0    1.17    0.84 
  34 -12   0    0.05    0.93 
  34  12   0    2.44    0.95 
  34  12   0    2.11    0.86 
  36 -12   0    0.83    0.84 
  36  12   0    3.98    1.19 
  36  12   0    2.51    1.00 
  36 -12   0    2.12    1.07 
  38 -12   0    3.83    1.25 
  38  12   0    4.85    1.28 
  38 -12   0    2.37    1.07 
  38  12   0    4.07    1.29 
  40  12   0    1.80    1.18 
  40  12   0    3.88    1.15 
   1  13   0   62.11    2.32 
  -1  13   0   63.25    2.35 
  -1 -13   0   62.95    2.38 
   1 -13   0   64.86    2.42 
  -3 -13   0  224.37    4.73 
   3 -13   0  214.15    4.87 
   3  13   0  222.43    4.81 
   3  13   0  221.72    4.40 
   5  13   0   71.74    2.26 
   5 -13   0   70.11    2.63 
   5  13   0   71.14    2.52 
  -5 -13   0   72.60    2.44 
   7  13   0   16.42    1.31 
   7  13   0   18.84    1.22 
  -7 -13   0   15.68    1.21 
   7 -13   0   16.65    1.59 
   9  13   0   67.89    2.23 
   9  13   0   63.85    2.43 
  -9 -13   0   64.55    2.20 
   9 -13   0   62.73    2.59 
  11  13   0   29.52    1.53 
  11 -13   0   29.74    1.83 
 -11 -13   0   27.89    1.43 
  11  13   0   26.29    1.66 
  13  13   0   94.55    2.78 
  13  13   0   94.33    3.10 
  13 -13   0   94.53    3.30 
  15 -13   0  131.12    3.99 
  15  13   0  130.25    3.41 
  15  13   0  129.83    3.76 
  17  13   0   14.29    1.48 
  17 -13   0   18.66    1.82 
  17  13   0   16.03    1.29 
  19 -13   0   32.11    2.07 
  19  13   0   30.70    1.73 
  19  13   0   31.26    1.95 
  21 -13   0   94.32    3.54 
  21  13   0   93.65    3.11 
  21  13   0   97.32    3.43 
  23 -13   0    2.49    1.02 
  23  13   0    3.93    0.89 
  23  13   0    0.98    0.80 
  25  13   0   40.73    2.23 
  25  13   0   44.55    2.52 
  25 -13   0   41.06    2.53 
  27  13   0   32.31    2.28 
  27 -13   0   33.12    2.36 
  27  13   0   36.03    2.13 
  29 -13   0   13.19    1.80 
  29  13   0   11.59    1.54 
  29  13   0    9.77    1.45 
  31  13   0    7.61    1.30 
  31 -13   0    6.10    1.41 
  31  13   0    8.54    1.45 
  33  13   0    8.58    1.50 
  33 -13   0   10.07    1.65 
  33  13   0   10.43    1.50 
  35  13   0    2.88    1.06 
  35  13   0    2.17    1.11 
  35 -13   0    4.45    1.27 
  37  13   0   12.83    1.93 
  37  13   0   12.10    1.69 
  37 -13   0   11.98    1.81 
  37 -13   0   13.54    1.92 
  39  13   0   21.69    2.44 
  39  13   0   22.53    2.29 
  39 -13   0   23.76    2.46 
   0  14   0  375.31    7.09 
   0 -14   0  385.36    7.15 
  -2 -14   0   11.05    1.21 
   2 -14   0   10.06    1.19 
   2  14   0   10.25    1.21 
   4  14   0    0.64    0.53 
  -4 -14   0    0.40    0.55 
   4 -14   0    0.79    0.63 
   4  14   0    0.76    0.53 
   6  14   0   23.99    1.42 
  -6 -14   0   22.86    1.47 
   6  14   0   21.94    1.47 
   6 -14   0   23.28    1.69 
  -8 -14   0    7.00    0.95 
   8  14   0    6.30    1.00 
   8  14   0    8.02    1.00 
   8 -14   0    8.77    1.29 
  10  14   0   -0.23    0.50 
  10 -14   0   -0.36    0.62 
 -10 -14   0    0.94    0.53 
  10  14   0   -1.08    0.54 
  12 -14   0  223.02    5.47 
  12  14   0  221.71    4.73 
  12  14   0  225.77    5.21 
  14  14   0    2.01    0.79 
  14  14   0    2.93    0.76 
  14 -14   0    3.11    0.97 
  16  14   0    3.69    0.82 
  16  14   0    5.35    1.02 
  16 -14   0    3.84    1.05 
  18  14   0    6.69    1.04 
  18  14   0    5.23    1.01 
  18 -14   0    5.83    1.24 
  20 -14   0    0.69    0.72 
  20  14   0    0.25    0.57 
  20  14   0   -0.15    0.66 
  22  14   0    3.26    0.87 
  22  14   0    3.18    1.05 
  22 -14   0    3.63    1.15 
  24  14   0  134.34    4.35 
  24 -14   0  139.17    4.60 
  24  14   0  136.18    4.03 
  26 -14   0    0.29    0.85 
  26  14   0    0.56    0.78 
  26  14   0    0.44    0.68 
  28 -14   0    1.84    0.95 
  28  14   0    2.90    0.99 
  28  14   0    3.66    0.93 
  30  14   0    0.55    0.75 
  30 -14   0    1.63    1.03 
  30  14   0    0.42    0.77 
  32  14   0    0.62    0.83 
  32  14   0    1.14    0.88 
  32 -14   0    0.65    0.97 
  34  14   0    1.01    0.86 
  34  14   0   -0.92    0.84 
  34 -14   0    0.63    1.01 
  36  14   0   49.55    2.86 
  36 -14   0   52.40    3.29 
  36  14   0   54.03    3.25 
  38  14   0    1.61    0.84 
  38 -14   0    1.41    1.10 
  38  14   0   -0.22    1.01 
   1 -15   0    3.11    0.87 
   1  15   0    3.05    0.75 
  -1 -15   0    3.02    0.80 
  -3 -15   0   -0.51    0.49 
   3 -15   0   -0.36    0.59 
   3  15   0    0.40    0.50 
   5 -15   0    0.71    0.71 
   5  15   0    1.17    0.68 
   5  15   0    1.07    0.57 
  -5 -15   0    1.49    0.65 
   7 -15   0    3.13    0.97 
  -7 -15   0    2.07    0.69 
   7  15   0    1.79    0.71 
   7  15   0    3.04    0.73 
   9 -15   0    2.22    0.88 
   9  15   0    2.84    0.81 
   9  15   0    3.08    0.73 
  -9 -15   0    2.99    0.71 
  11  15   0   -0.13    0.49 
  11  15   0    1.30    0.62 
  11 -15   0    0.00    0.74 
  13 -15   0    5.91    1.28 
  13  15   0    7.49    1.05 
  13  15   0    6.19    1.10 
  15  15   0   25.57    1.81 
  15  15   0   24.93    1.59 
  15 -15   0   25.71    2.07 
  17  15   0    2.39    0.76 
  17  15   0    2.44    0.87 
  17 -15   0    2.04    1.00 
  19 -15   0   17.04    1.98 
  19  15   0   13.61    1.60 
  19  15   0   15.70    1.51 
  21  15   0   20.14    1.59 
  21  15   0   18.88    1.88 
  21 -15   0   15.75    1.82 
  23  15   0   -0.34    0.69 
  23  15   0    0.24    0.65 
  23 -15   0    1.18    0.95 
  25  15   0    6.36    1.25 
  25 -15   0    9.04    1.59 
  25  15   0    7.91    1.21 
  27 -15   0   20.43    2.26 
  27  15   0   17.96    1.78 
  27  15   0   19.20    1.98 
  29  15   0    2.26    0.87 
  29 -15   0    1.53    1.16 
  29  15   0    4.19    1.22 
  31  15   0   20.42    2.21 
  31  15   0   19.78    2.05 
  31 -15   0   23.00    2.41 
  33 -15   0   16.85    2.13 
  33  15   0   17.87    2.02 
  33  15   0   15.85    2.02 
  35  15   0    0.62    0.96 
  35  15   0    0.57    0.80 
  35 -15   0    0.99    1.02 
  37  15   0    2.50    0.98 
  37 -15   0    0.90    1.17 
  37  15   0    1.91    1.05 
   0 -16   0   21.02    1.65 
   2 -16   0    2.69    0.83 
   2  16   0    2.44    0.86 
  -2 -16   0    2.43    0.77 
  -4 -16   0    4.73    0.93 
   4 -16   0    5.72    1.17 
   4  16   0    2.92    0.86 
   6  16   0  366.58    7.30 
  -6 -16   0  363.01    7.03 
   6 -16   0  359.06    7.53 
   6  16   0  361.32    6.66 
   8  16   0    9.38    1.29 
   8  16   0    8.02    1.08 
  -8 -16   0    8.00    1.10 
   8 -16   0    7.62    1.29 
  10  16   0   23.90    1.57 
  10 -16   0   17.53    1.81 
  10  16   0   23.37    1.78 
  12  16   0   17.36    1.42 
  12 -16   0   16.51    1.80 
  12  16   0   21.53    1.73 
  14  16   0    1.12    0.67 
  14  16   0   -0.07    0.62 
  14 -16   0    0.88    0.86 
  16  16   0   -0.50    0.69 
  16  16   0    0.75    0.66 
  16 -16   0   -0.05    0.70 
  18 -16   0  177.43    5.29 
  18  16   0  164.16    4.34 
  18  16   0  167.91    4.84 
  20  16   0    4.55    1.14 
  20 -16   0    3.91    1.23 
  20  16   0    7.38    1.19 
  22 -16   0    6.39    1.38 
  22  16   0    9.31    1.31 
  22  16   0    7.98    1.35 
  24  16   0   18.99    1.87 
  24 -16   0   21.12    2.32 
  24  16   0   23.27    1.99 
  26  16   0    0.99    0.84 
  26  16   0    2.48    0.94 
  26 -16   0    1.45    1.01 
  28  16   0   -0.06    0.71 
  28  16   0   -0.37    0.95 
  28 -16   0    0.06    1.00 
  30 -16   0   82.03    3.95 
  30  16   0   75.49    3.69 
  30  16   0   72.94    3.42 
  32  16   0    0.53    1.20 
  32 -16   0    0.00    1.00 
  32  16   0   -0.54    0.84 
  34  16   0    8.35    1.61 
  34 -16   0    5.98    1.56 
  36  16   0    2.45    1.21 
   1 -17   0   36.66    2.18 
  -1 -17   0   40.57    2.27 
   3  17   0  123.34    3.91 
  -3 -17   0  117.73    3.74 
   3 -17   0  129.13    4.07 
  -5 -17   0   49.34    2.38 
   5  17   0   53.80    2.56 
   5 -17   0   50.84    2.65 
   7  17   0   23.46    1.84 
  -7 -17   0   27.64    1.81 
   7 -17   0   25.81    2.03 
   9  17   0   32.05    2.08 
   9 -17   0   28.86    2.15 
  11  17   0   21.95    1.85 
  11 -17   0   29.82    2.25 
  13 -17   0   42.13    2.57 
  13  17   0   44.45    2.48 
  15  17   0  102.58    3.73 
  15 -17   0  103.40    4.03 
  17  17   0   32.80    2.27 
  17 -17   0   32.45    2.43 
  19  17   0    4.14    1.09 
  19 -17   0    3.88    1.23 
  21  17   0    2.45    0.93 
  21 -17   0    2.89    1.22 
  23 -17   0   14.93    1.98 
  23  17   0   12.29    1.70 
  25  17   0   15.14    1.87 
  25 -17   0   19.01    2.35 
  27  17   0   79.63    3.69 
  27 -17   0   78.70    3.92 
  29 -17   0   10.02    1.87 
  29  17   0    8.47    1.62 
  31  17   0    2.34    1.08 
  31 -17   0    3.48    1.35 
  33  17   0    1.51    1.11 
   0 -18   0   74.46    3.14 
   2 -18   0   -0.26    0.65 
  -2 -18   0   -0.96    0.55 
  -4 -18   0    3.51    0.97 
   4  18   0    5.73    1.13 
   4 -18   0    3.57    1.07 
  -6 -18   0    3.74    0.97 
   6 -18   0    3.60    1.13 
   6  18   0    4.74    1.12 
   8 -18   0    7.26    1.37 
   8  18   0    7.04    1.30 
  10 -18   0   -1.00    0.74 
  10  18   0   -1.22    0.63 
  12  18   0   39.63    2.47 
  12 -18   0   44.67    2.71 
  14 -18   0    2.26    0.93 
  14  18   0    0.41    0.81 
  16 -18   0    0.21    0.85 
  16  18   0   -1.06    0.57 
  18 -18   0   15.02    1.97 
  18  18   0   16.73    1.90 
  20  18   0    0.59    0.80 
  20 -18   0    1.16    1.07 
  22 -18   0    0.46    1.05 
  22  18   0    0.84    0.88 
  24  18   0   43.50    2.80 
  24 -18   0   56.26    3.31 
  26 -18   0    1.09    1.11 
  26  18   0    0.05    0.92 
  28 -18   0   -0.46    1.01 
  28  18   0    0.72    0.91 
  30  18   0    6.78    1.47 
  32  18   0    0.48    0.96 
  -1 -19   0    2.20    0.94 
   1 -19   0    2.49    0.95 
   3 -19   0    0.36    0.85 
  -3 -19   0    0.34    0.72 
   5 -19   0    1.43    0.90 
   5  19   0    0.90    0.81 
   7 -19   0    8.28    1.47 
   7  19   0    8.46    1.35 
   9  19   0    6.41    1.24 
   9 -19   0    4.56    1.16 
  11  19   0   13.76    1.68 
  11 -19   0   16.06    2.03 
  13 -19   0   12.64    1.84 
  13  19   0   11.01    1.57 
  15 -19   0   -0.09    0.72 
  15  19   0    0.49    0.82 
  17 -19   0   -0.36    0.89 
  17  19   0   -0.13    0.67 
  19  19   0   25.97    2.19 
  19 -19   0   25.23    2.58 
  21 -19   0    9.24    1.82 
  21  19   0    5.00    1.32 
  23  19   0    0.81    0.97 
  23 -19   0    2.17    1.17 
  25 -19   0   10.76    1.89 
  25  19   0    7.82    1.50 
  27  19   0    2.46    1.06 
  29  19   0   -0.50    0.91 
   0 -20   0    1.75    0.94 
   2 -20   0    9.38    1.53 
  -2 -20   0    7.96    1.46 
   4 -20   0    5.25    1.27 
   6 -20   0  104.97    4.15 
   6  20   0   96.88    3.80 
   8  20   0    8.81    1.45 
   8 -20   0    8.81    1.54 
  10 -20   0    5.61    1.40 
  10  20   0    6.32    1.32 
  12  20   0   14.93    1.78 
  12 -20   0   16.52    2.12 
  14 -20   0   10.00    1.81 
  14  20   0    4.99    1.25 
  16 -20   0    1.73    1.12 
  16  20   0    4.05    1.23 
  18  20   0   48.73    2.96 
  18 -20   0   56.48    3.40 
  20  20   0    3.71    1.28 
  20 -20   0    4.98    1.43 
  22  20   0    5.02    1.31 
  22 -20   0    7.31    1.73 
  24  20   0    1.62    0.97 
  -1 -21   0    2.00    1.01 
   1 -21   0    3.29    1.14 
   3 -21   0   50.09    2.94 
   5 -21   0    7.79    1.54 
   7 -21   0    0.08    0.90 
   9 -21   0    7.20    1.58 
   9  21   0    5.33    1.32 
  11 -21   0    3.69    1.36 
  11  21   0    4.99    1.27 
  13  21   0    4.70    1.32 
  13 -21   0    3.04    1.26 
  15 -21   0   46.23    3.16 
  15  21   0   48.11    2.95 
  17  21   0    1.22    0.99 
  17 -21   0    3.45    1.28 
  19 -21   0    0.34    0.97 
  19  21   0   -0.36    0.91 
  21  21   0    3.10    1.33 
   0 -22   0    8.32    1.59 
   2 -22   0    4.69    1.36 
   4 -22   0    1.89    1.06 
   6 -22   0   42.79    2.92 
   8 -22   0    0.09    0.94 
  10 -22   0    2.01    1.18 
  10  22   0    4.64    1.33 
  12  22   0    1.84    1.04 
  12 -22   0    1.01    1.07 
  14 -22   0    1.47    1.05 
  14  22   0    1.22    1.04 
  16  22   0    0.05    0.96 
   3 -23   0    9.39    1.62 
   5 -23   0    2.75    1.21 
   7 -23   0   12.28    1.92 
   9 -23   0   -0.29    0.79 
  11  23   0    9.19    1.67 
   4 -24   0    4.88    1.43 
  46   0  -1    0.52    0.85 
  44   0  -1    0.28    1.00 
  42   0  -1   -0.22    0.85 
  40   0  -1   -0.82    0.55 
  38   0  -1    0.08    0.69 
  36   0  -1   -0.45    0.63 
  34   0  -1   -0.78    0.43 
  32   0  -1    0.19    0.63 
  30   0  -1    0.94    0.66 
  28   0  -1   -0.05    0.44 
  26   0  -1    1.22    0.37 
  26   0  -1   -0.22    0.49 
  24   0  -1    0.61    0.31 
  24   0  -1    0.81    0.46 
  22   0  -1   -0.02    0.27 
  22   0  -1    0.06    0.32 
  20   0  -1    0.56    0.28 
  20   0  -1    0.53    0.41 
  18   0  -1    0.25    0.26 
  18   0  -1    0.02    0.35 
  16   0  -1   -0.23    0.19 
  16   0  -1    0.07    0.28 
  14   0  -1    0.24    0.27 
  14   0  -1    0.28    0.20 
  12   0  -1   -0.16    0.20 
  12   0  -1    0.21    0.18 
  10   0  -1   -0.11    0.19 
  10   0  -1    0.00    0.14 
   8   0  -1    0.07    0.16 
  -8   0   1    0.25    0.15 
  -6   0   1   -0.03    0.09 
  -4   0   1    0.12    0.08 
  -2   0   1    0.12    0.07 
   0   0   1   -0.01    0.03 
   0   0   1   -0.03    0.03 
   0   0  -1   -0.03    0.02 
   2   0   1   -0.15    0.06 
   2   0   1   -0.16    0.05 
   4   0   1    0.10    0.12 
   4   0   1    0.55    0.12 
   6   0   1    0.07    0.15 
   6   0   1   -0.05    0.11 
   8   0   1    0.22    0.16 
   8   0   1   -0.12    0.17 
  10   0   1    0.53    0.20 
  10   0   1    1.33    0.32 
  12   0   1   -0.14    0.18 
  12   0   1    0.20    0.23 
  14   0   1    0.06    0.18 
  14   0   1    0.13    0.23 
  16   0   1    0.16    0.22 
  16   0   1    0.18    0.29 
  18   0   1    0.18    0.25 
  18   0   1   -0.43    0.27 
  20   0   1   -0.28    0.40 
  20   0   1    0.41    0.28 
  22   0   1    0.52    0.30 
  22   0   1    0.69    0.48 
  24   0   1   -0.06    0.40 
  24   0   1   -0.35    0.33 
  26   0   1   -0.02    0.41 
  26   0   1    0.28    0.34 
  28   0   1   -0.24    0.44 
  30   0   1    0.09    0.55 
  32   0   1    0.72    0.70 
  34   0   1    0.28    0.63 
  36   0   1   -1.14    0.61 
  38   0   1    0.22    0.82 
  40   0   1    0.91    0.84 
  42   0   1    0.18    0.71 
  44   0   1    0.55    0.97 
  46   0   1    1.74    1.59 
  47  -1  -1   -1.04    1.21 
  47   1  -1   -0.03    0.93 
  45   1  -1    1.21    1.01 
  45  -1  -1    0.25    1.02 
  43   1  -1    4.81    1.36 
  43  -1  -1    5.35    1.33 
  41   1  -1   62.70    3.25 
  41  -1  -1   55.11    3.10 
  39   1  -1    5.96    1.32 
  39  -1  -1    7.29    1.42 
  37  -1  -1   21.09    2.12 
  37   1  -1   19.32    2.05 
  35   1  -1    0.36    0.67 
  35  -1  -1    1.59    0.77 
  33  -1  -1    0.10    0.62 
  33   1  -1    1.43    0.75 
  31  -1  -1    4.91    1.03 
  31   1  -1    4.47    1.04 
  29  -1  -1  173.68    3.88 
  29  -1  -1  172.23    4.57 
  29   1  -1  184.02    4.65 
  27  -1  -1    0.66    0.39 
  27  -1  -1   -0.14    0.40 
  27   1  -1    0.27    0.48 
  25  -1  -1   24.31    1.11 
  25   1  -1   24.02    0.95 
  25  -1  -1   26.80    1.62 
  25   1  -1   25.68    1.57 
  23   1  -1    6.04    0.53 
  23   1  -1    6.20    0.87 
  23  -1  -1    4.73    0.57 
  23  -1  -1    7.01    0.91 
  21   1  -1    1.41    0.30 
  21  -1  -1    1.32    0.48 
  21   1  -1    1.18    0.47 
  21  -1  -1    1.52    0.38 
  19   1  -1    1.05    0.29 
  19  -1  -1    1.39    0.49 
  19  -1  -1    0.59    0.34 
  19   1  -1    0.47    0.44 
  17   1  -1  954.34   13.20 
  17  -1  -1  929.76   12.24 
  17   1  -1  926.34   11.85 
  15  -1  -1   12.09    0.65 
  15   1  -1   11.82    0.78 
  15   1  -1   11.61    0.50 
  15  -1  -1   12.94    0.82 
  13  -1  -1   10.70    0.59 
  13   1  -1    9.94    0.43 
  13   1  -1   10.43    0.69 
  11  -1  -1  811.61   10.47 
  11   1  -1  817.18   10.99 
   9  -1  -1   45.14    1.05 
   9   1  -1   43.52    1.17 
  -9  -1   1   45.27    0.83 
   7   1  -1   16.09    0.61 
  -7  -1   1   16.05    0.42 
  -5  -1   1  987.84   12.56 
   5   1  -1  970.24   12.37 
  -5   1   1  991.96   12.86 
  -3   1   1    0.84    0.13 
   3   1  -1    0.70    0.10 
   3   1  -1    0.83    0.13 
  -3  -1   1    0.95    0.11 
   1   1  -1    0.53    0.09 
  -1   1   1    0.53    0.10 
  -1  -1   1    0.90    0.11 
  -1   1   1    0.69    0.11 
   1   1   1   22.51    0.47 
   1   1   1   21.88    0.54 
   3   1   1    1.02    0.10 
   3  -1   1    1.34    0.18 
   3   1   1    0.80    0.15 
   5   1   1    0.27    0.15 
   5  -1   1    0.35    0.15 
   5   1   1    0.20    0.08 
   7  -1   1 3688.72   49.52 
   7  -1   1 3761.91   48.16 
   7   1   1 3791.56   46.72 
   7   1   1 3907.76   50.92 
   9  -1   1    9.61    0.52 
   9  -1   1    9.15    0.58 
   9   1   1    8.00    0.34 
  11  -1   1    5.42    0.48 
  11   1   1    4.77    0.54 
  11   1   1    5.63    0.34 
  11  -1   1    4.81    0.54 
  13  -1   1  398.88    6.23 
  13   1   1  386.26    6.20 
  13   1   1  392.21    5.21 
  13  -1   1  396.06    5.58 
  15   1   1    6.65    0.42 
  15   1   1    6.32    0.72 
  15  -1   1    7.31    0.55 
  15  -1   1    4.91    0.64 
  17  -1   1   10.75    0.87 
  17  -1   1   10.32    0.68 
  17   1   1   10.59    0.54 
  17   1   1   10.52    0.86 
  19   1   1  816.91   10.50 
  19  -1   1  795.01   12.06 
  19  -1   1  815.75   10.94 
  19   1   1  833.87   12.15 
  21   1   1    1.55    0.54 
  21   1   1    1.45    0.32 
  21  -1   1    1.80    0.41 
  21  -1   1    1.44    0.50 
  23   1   1   13.66    1.17 
  23  -1   1   15.17    1.19 
  23   1   1   14.84    0.73 
  23  -1   1   15.33    0.90 
  25  -1   1   28.60    1.69 
  25   1   1   29.68    1.10 
  25   1   1   32.48    1.82 
  25  -1   1   31.40    1.26 
  27  -1   1   32.84    1.32 
  27   1   1   29.33    1.77 
  27  -1   1   29.45    1.84 
  29  -1   1    0.38    0.61 
  29   1   1    0.03    0.52 
  31   1   1  363.45    7.67 
  31  -1   1  371.41    7.75 
  33  -1   1    2.13    0.82 
  33   1   1    1.46    0.75 
  35   1   1   27.54    2.09 
  35  -1   1   27.48    2.05 
  37   1   1   32.87    2.42 
  37  -1   1   29.63    2.27 
  39   1   1    6.58    1.39 
  39  -1   1    7.67    1.49 
  41  -1   1   -0.04    0.80 
  41   1   1    0.27    0.71 
  43  -1   1   51.00    3.30 
  43   1   1   49.78    3.23 
  45   1   1    1.48    0.99 
  45  -1   1    4.53    1.49 
  46  -2  -1    6.02    1.49 
  46   2  -1    5.25    1.39 
  44  -2  -1   13.68    2.04 
  44   2  -1   11.61    1.86 
  42  -2  -1   40.78    2.80 
  42   2  -1   33.40    2.52 
  40  -2  -1    1.28    0.82 
  40   2  -1    2.19    0.94 
  38   2  -1  248.00    6.52 
  38  -2  -1  257.97    6.68 
  36  -2  -1    4.24    1.06 
  36   2  -1    3.84    1.03 
  34   2  -1    7.02    1.19 
  34  -2  -1    8.35    1.34 
  32   2  -1   57.64    2.65 
  32  -2  -1   58.73    2.69 
  30   2  -1   68.73    2.80 
  30  -2  -1   73.24    2.91 
  30  -2  -1   65.67    2.11 
  28  -2  -1    0.00    0.33 
  28   2  -1    0.37    0.54 
  28  -2  -1    0.04    0.52 
  26  -2  -1  997.62   15.04 
  26  -2  -1  979.63   13.55 
  26   2  -1 1003.06   14.99 
  24   2  -1    7.58    0.51 
  24  -2  -1    6.61    0.91 
  24   2  -1    7.33    0.97 
  24  -2  -1    7.78    0.78 
  22   2  -1    0.04    0.20 
  22   2  -1   -0.01    0.35 
  22  -2  -1   -0.01    0.39 
  22  -2  -1    0.40    0.30 
  20  -2  -1   15.92    0.90 
  20   2  -1   15.10    0.56 
  20   2  -1   14.81    1.04 
  20  -2  -1   14.20    1.04 
  18  -2  -1   11.85    0.77 
  18   2  -1   12.25    0.50 
  18   2  -1   11.92    0.95 
  16   2  -1   22.00    1.11 
  16   2  -1   22.47    0.60 
  16  -2  -1   21.99    0.94 
  14   2  -1 1381.81   17.19 
  14  -2  -1 1388.32   17.81 
  14   2  -1 1426.87   18.50 
  12   2  -1    5.95    0.59 
  12  -2  -1    3.77    0.43 
  10  -2  -1   66.73    1.49 
  10   2  -1   65.19    1.57 
 -10  -2   1   66.81    1.04 
   8  -2  -1   24.46    0.81 
   8   2  -1   25.84    0.84 
  -8  -2   1   24.93    0.51 
  -6  -2   1   68.44    1.07 
   6   2  -1   68.37    1.36 
   6  -2  -1   67.53    1.38 
  -4  -2   1   27.88    0.60 
   4   2  -1   29.61    0.69 
  -2   2   1 2523.05   32.44 
   2   2  -1 2584.46   32.19 
  -2   2   1 2447.44   32.64 
   2   2  -1 2558.20   31.70 
  -2  -2   1 2450.80   32.17 
   0   2   1    4.11    0.15 
   0  -2   1    4.22    0.28 
   0   2   1    4.03    0.24 
   0   2  -1    4.19    0.27 
   0   2   1    4.24    0.27 
   2   2   1   59.08    0.98 
   2   2   1   57.81    1.18 
   2  -2   1   60.05    1.18 
   4   2   1   43.79    0.72 
   4   2   1   42.22    1.05 
   4  -2   1   41.62    1.01 
   6   2   1   41.28    1.15 
   6  -2   1   43.52    1.08 
   6   2   1   42.43    0.68 
   8   2   1    7.25    0.54 
   8  -2   1    7.63    0.54 
   8   2   1    7.67    0.22 
  10   2   1  636.89    8.91 
  10  -2   1  622.15    8.45 
  10   2   1  629.13    7.69 
  12  -2   1    2.62    0.40 
  12   2   1    2.40    0.21 
  12   2   1    2.07    0.41 
  14   2   1    9.53    0.77 
  14  -2   1   10.20    0.77 
  14  -2   1   10.39    0.66 
  14   2   1   10.17    0.35 
  16  -2   1   96.94    2.55 
  16   2   1   96.82    1.54 
  16  -2   1   94.25    2.14 
  16   2   1  104.14    2.65 
  18  -2   1   26.20    1.35 
  18   2   1   27.99    0.70 
  18   2   1   26.98    1.41 
  18  -2   1   28.51    1.13 
  20  -2   1   97.49    2.29 
  20   2   1  103.00    2.93 
  20  -2   1   96.70    2.81 
  20   2   1   98.94    1.67 
  22  -2   1  314.82    6.13 
  22  -2   1  323.43    5.25 
  22   2   1  316.62    6.16 
  22   2   1  317.99    4.37 
  24  -2   1    0.61    0.43 
  24  -2   1    0.31    0.49 
  24   2   1    0.12    0.54 
  26   2   1    0.97    0.64 
  26  -2   1    0.79    0.46 
  26  -2   1    0.87    0.54 
  28   2   1  112.15    3.62 
  28  -2   1  112.70    3.58 
  28  -2   1  113.93    2.76 
  30   2   1   61.80    2.79 
  30  -2   1   62.46    2.81 
  32  -2   1   35.86    2.28 
  32   2   1   36.90    2.28 
  34  -2   1   34.98    2.27 
  34   2   1   39.05    2.38 
  36  -2   1    5.17    1.18 
  36   2   1    6.99    1.36 
  38   2   1    1.29    0.92 
  38  -2   1   -0.17    0.68 
  40  -2   1   28.25    2.40 
  40   2   1   21.94    2.36 
  42   2   1   18.56    2.30 
  42  -2   1   13.79    2.00 
  44  -2   1   17.48    2.31 
  44   2   1   15.71    2.18 
  47   3  -1   -1.17    0.69 
  45  -3  -1    1.40    0.98 
  45   3  -1   -1.21    0.71 
  43   3  -1   15.90    2.05 
  43  -3  -1   16.27    2.15 
  41   3  -1   60.68    3.30 
  41  -3  -1   62.95    3.28 
  39   3  -1    3.83    1.14 
  39  -3  -1    3.78    1.14 
  37   3  -1   32.18    2.34 
  37  -3  -1   32.27    2.40 
  35   3  -1    2.09    0.78 
  35  -3  -1    2.26    0.89 
  33  -3  -1   -0.52    0.48 
  33   3  -1   -0.34    0.52 
  31   3  -1   14.36    1.54 
  31  -3  -1   15.00    1.62 
  31  -3  -1   13.55    1.17 
  29  -3  -1  354.45    6.20 
  29   3  -1  361.39    7.25 
  29  -3  -1  368.04    7.38 
  27   3  -1   33.09    1.85 
  27  -3  -1   32.44    1.47 
  27  -3  -1   33.40    1.89 
  25   3  -1   71.81    2.60 
  25  -3  -1   67.41    2.57 
  25  -3  -1   66.29    2.07 
  23  -3  -1   10.63    1.15 
  23   3  -1    9.98    1.04 
  23  -3  -1   12.41    0.93 
  21  -3  -1    0.33    0.37 
  21   3  -1    0.40    0.40 
  19  -3  -1    2.50    0.49 
  19   3  -1    2.12    0.55 
  17  -3  -1  777.79   10.83 
  17   3  -1  796.50   11.40 
  15  -3  -1    0.25    0.28 
  15   3  -1   -0.09    0.24 
  13  -3  -1   22.03    0.95 
  13   3  -1   21.01    0.99 
 -13  -3   1   22.40    0.44 
  11  -3  -1   81.08    1.84 
  11   3  -1   77.95    1.87 
 -11  -3   1   80.20    1.17 
   9  -3  -1   -0.03    0.22 
   9   3  -1   -0.01    0.21 
  -9  -3   1    0.05    0.10 
   7   3  -1   14.16    0.63 
  -7  -3   1   13.20    0.42 
   7  -3  -1   12.74    0.65 
   5   3  -1 4000.12   52.32 
  -5  -3   1 4048.69   50.94 
   5   3  -1 4058.73   50.72 
   5  -3  -1 4038.31   52.50 
  -3  -3   1   25.49    0.70 
   3  -3  -1   25.51    0.79 
   3   3  -1   25.57    0.70 
   3   3  -1   26.36    0.74 
   1   3  -1   48.32    1.04 
   1  -3  -1   48.72    1.07 
  -1   3   1   49.86    1.12 
   1   3  -1   48.46    0.98 
  -1  -3   1   47.92    1.07 
   1   3   1  628.18    8.41 
  -1  -3  -1  630.86    8.11 
   1  -3   1  643.37    8.32 
   1   3   1  640.69    7.73 
   3   3   1    0.51    0.21 
   3  -3   1    0.37    0.23 
   5  -3   1   27.53    0.92 
   5   3   1   27.26    0.94 
   7  -3   1 1494.30   18.94 
   7   3   1 1511.46   19.37 
   9   3   1   11.29    0.74 
   9  -3   1   11.77    0.70 
  11  -3   1   14.02    0.77 
  13   3   1  163.71    3.36 
  13  -3   1  159.11    3.03 
  15   3   1    1.11    0.40 
  15  -3   1    1.24    0.37 
  17   3   1    0.19    0.36 
  17  -3   1   -0.33    0.29 
  17  -3   1   -0.04    0.32 
  19  -3   1 1798.65   24.56 
  19  -3   1 1835.55   23.49 
  19   3   1 1852.39   24.60 
  21  -3   1    0.40    0.38 
  21   3   1    0.20    0.38 
  21  -3   1    0.25    0.42 
  23  -3   1   11.63    0.94 
  23   3   1   12.65    1.28 
  23  -3   1   11.38    1.19 
  25  -3   1  130.60    3.05 
  25   3   1  130.68    3.69 
  25  -3   1  125.56    3.65 
  27  -3   1    3.14    0.82 
  27   3   1    2.94    0.80 
  27  -3   1    2.60    0.61 
  29  -3   1    4.74    0.76 
  29   3   1    5.07    0.99 
  29  -3   1    4.91    1.01 
  31  -3   1  464.93    9.10 
  31   3   1  472.79    9.15 
  33   3   1    5.79    1.17 
  33  -3   1    5.82    1.20 
  35  -3   1    2.85    0.91 
  35   3   1    1.88    0.89 
  37  -3   1   44.37    2.74 
  37   3   1   36.78    2.55 
  39   3   1   14.11    1.85 
  39  -3   1   14.75    2.00 
  41   3   1    1.08    0.91 
  41  -3   1    0.33    0.72 
  43   3   1  133.06    5.10 
  43  -3   1  133.77    5.19 
  45  -3   1    0.70    1.01 
  45   3   1    0.96    0.99 
  46   4  -1    1.08    0.96 
  46  -4  -1   -0.03    0.93 
  44   4  -1   15.06    2.04 
  44  -4  -1   18.15    2.30 
  42  -4  -1    0.24    0.85 
  42   4  -1    0.33    0.86 
  40  -4  -1   -0.09    0.77 
  40   4  -1    0.63    0.67 
  38  -4  -1   59.11    3.14 
  38   4  -1   60.51    3.10 
  36   4  -1    6.76    1.30 
  36  -4  -1    7.68    1.40 
  34   4  -1    3.09    0.97 
  34  -4  -1    3.72    0.99 
  32  -4  -1   81.24    2.61 
  32   4  -1   78.60    3.16 
  32  -4  -1   75.60    3.14 
  30  -4  -1    0.55    0.65 
  30  -4  -1    0.22    0.51 
  30   4  -1   -0.35    0.56 
  28  -4  -1    7.47    0.91 
  28   4  -1    9.24    1.21 
  28  -4  -1    8.39    1.12 
  26  -4  -1   97.13    2.64 
  26  -4  -1   92.00    3.09 
  26   4  -1   92.25    3.05 
  24  -4  -1    1.57    0.55 
  24   4  -1    1.63    0.63 
  22   4  -1    1.08    0.48 
  22  -4  -1    0.86    0.45 
  20   4  -1  108.83    2.91 
  20  -4  -1  102.28    2.60 
  18  -4  -1   16.03    1.00 
  18   4  -1   14.02    0.99 
  16   4  -1    2.82    0.52 
  16  -4  -1    2.66    0.51 
  14  -4  -1  328.34    5.28 
  14   4  -1  325.03    5.42 
  12   4  -1    0.28    0.28 
 -12  -4   1    0.52    0.11 
  12  -4  -1    0.47    0.31 
  10   4  -1    2.22    0.41 
 -10  -4   1    1.68    0.19 
  10  -4  -1    1.64    0.41 
  -8  -4   1   30.13    0.74 
   8   4  -1   31.00    1.04 
   8   4  -1   32.00    1.04 
   8  -4  -1   30.37    1.07 
   6   4  -1    2.64    0.34 
  -6  -4   1    3.23    0.32 
   6  -4  -1    3.33    0.45 
   6   4  -1    3.50    0.40 
   4   4  -1  102.73    1.87 
   4  -4  -1  102.62    2.01 
   4   4  -1  100.96    1.87 
  -4  -4   1   99.46    1.80 
  -2  -4   1  979.31   12.30 
   2   4  -1  978.76   12.00 
  -2   4   1  941.89   12.57 
   2   4  -1  962.87   12.38 
   0   4  -1   35.70    0.92 
   0   4  -1   36.89    0.97 
   0   4   1   34.59    1.01 
   0   4   1   35.80    0.78 
   0  -4  -1   34.03    0.94 
   0  -4   1   34.91    1.02 
   2  -4   1    0.31    0.26 
  -2  -4  -1    0.13    0.17 
   2   4   1    0.15    0.13 
   2   4   1   -0.07    0.17 
   4   4   1    0.75    0.27 
  -4  -4  -1    1.03    0.21 
   4  -4   1    0.91    0.31 
   4   4   1    0.23    0.18 
   6  -4   1   97.27    2.07 
   6   4   1   94.78    2.08 
  -6  -4  -1   93.34    1.54 
   8  -4   1   10.83    0.72 
   8   4   1    8.67    0.65 
  -8  -4  -1    8.31    0.34 
  10  -4   1  227.13    3.91 
  10   4   1  225.66    4.05 
  12   4   1    6.56    0.72 
  12  -4   1    6.88    0.69 
  14  -4   1    3.57    0.56 
  14   4   1    3.00    0.53 
  16  -4   1   13.24    0.90 
  16   4   1   12.59    0.99 
  18  -4   1   27.82    1.31 
  18   4   1   28.54    1.48 
  20  -4   1    0.41    0.39 
  20   4   1    0.98    0.50 
  22  -4   1    2.38    0.58 
  22   4   1    2.36    0.70 
  22  -4   1    2.59    0.63 
  24  -4   1   24.37    1.57 
  24   4   1   23.61    1.59 
  24  -4   1   24.16    1.36 
  26   4   1    0.47    0.56 
  26  -4   1    0.38    0.46 
  26  -4   1    0.20    0.46 
  28   4   1    3.50    0.89 
  28  -4   1    4.29    0.93 
  28  -4   1    2.17    0.62 
  30   4   1   10.22    1.40 
  30  -4   1    9.47    1.08 
  30  -4   1   12.26    1.53 
  32  -4   1    3.23    0.95 
  32   4   1    2.90    0.87 
  34  -4   1    1.28    0.71 
  34   4   1    1.32    0.76 
  36   4   1    9.62    1.49 
  36  -4   1    9.08    1.50 
  38   4   1    1.24    0.89 
  38  -4   1    0.80    0.94 
  40  -4   1    6.49    1.42 
  40   4   1    5.32    1.26 
  42  -4   1   16.44    2.14 
  42   4   1   13.24    1.99 
  44   4   1    1.96    1.08 
  44  -4   1    2.03    1.13 
  45   5  -1   -0.71    0.82 
  45  -5  -1   -1.30    0.82 
  43   5  -1    2.21    1.12 
  43  -5  -1    2.00    1.12 
  41  -5  -1    2.74    1.01 
  41   5  -1    1.48    0.98 
  39   5  -1    5.94    1.34 
  39  -5  -1    4.91    1.22 
  37   5  -1    0.18    0.81 
  37  -5  -1    1.50    0.89 
  35   5  -1   13.47    1.67 
  35  -5  -1   17.04    1.94 
  33   5  -1    0.50    0.64 
  33  -5  -1    0.63    0.60 
  33  -5  -1    0.21    0.54 
  31   5  -1   20.55    1.72 
  31  -5  -1   22.32    1.84 
  31  -5  -1   22.17    1.55 
  29  -5  -1   19.40    1.65 
  29  -5  -1   16.46    1.29 
  29   5  -1   16.59    1.64 
  27  -5  -1    9.22    1.04 
  27   5  -1   10.29    1.28 
  25  -5  -1   -0.56    0.38 
  25   5  -1    0.49    0.46 
  23  -5  -1    8.52    0.92 
  23   5  -1    6.94    0.92 
  21  -5  -1    6.11    0.82 
  21   5  -1    6.92    0.91 
  19  -5  -1   40.35    1.63 
  19   5  -1   41.22    1.73 
  17  -5  -1    2.04    0.51 
  17   5  -1    3.60    0.63 
  15   5  -1   21.66    1.13 
  15  -5  -1   19.28    1.06 
  13  -5  -1    0.10    0.31 
 -13  -5   1    0.08    0.10 
  13   5  -1    0.05    0.28 
  11  -5  -1  471.69    7.07 
 -11  -5   1  466.82    6.08 
  11   5  -1  471.61    7.07 
  11   5  -1  470.56    6.83 
   9   5  -1    0.47    0.28 
   9  -5  -1    0.14    0.29 
   9   5  -1    0.40    0.29 
  -9  -5   1    0.53    0.18 
  -7  -5   1   10.12    0.52 
   7  -5  -1    8.46    0.75 
   7   5  -1    9.13    0.61 
   7   5  -1    8.64    0.63 
  -5  -5   1  352.58    5.02 
   5   5  -1  354.53    5.22 
   5   5  -1  350.00    5.05 
   5  -5  -1  355.07    5.36 
   3   5  -1    5.29    0.44 
  -3  -5   1    5.34    0.49 
   3  -5  -1    4.63    0.48 
   3   5  -1    5.33    0.45 
  -3   5   1    4.82    0.50 
  -1  -5   1   67.08    1.58 
   1  -5  -1   68.68    1.58 
  -1   5   1   67.88    1.32 
   1   5  -1   66.90    1.49 
   1   5  -1   67.56    1.49 
  -1   5   1   69.67    1.63 
   1   5   1  248.50    4.04 
   1  -5   1  253.84    4.03 
   1   5   1  247.35    3.52 
  -1   5  -1  251.75    3.84 
  -1  -5  -1  250.76    3.85 
  -1   5  -1  254.94    3.91 
   3   5   1    0.94    0.22 
   3  -5   1    0.89    0.30 
  -3  -5  -1    1.18    0.27 
   3   5   1    0.79    0.27 
   5   5   1    1.00    0.34 
  -5  -5  -1    0.97    0.23 
   5  -5   1    0.72    0.31 
   5   5   1    0.82    0.24 
   7  -5   1    1.75    0.48 
  -9  -5  -1    0.23    0.15 
   9  -5   1    0.25    0.32 
   9   5   1    0.41    0.29 
 -11  -5  -1    0.14    0.12 
  11   5   1    0.01    0.28 
  11  -5   1    0.00    0.28 
  13  -5   1  284.82    4.94 
  13   5   1  285.43    5.13 
  15  -5   1   26.46    1.25 
  15   5   1   24.94    1.29 
  17   5   1    5.59    0.81 
  17  -5   1    4.17    0.67 
  19  -5   1   66.87    2.14 
  19   5   1   66.35    2.35 
  21  -5   1    0.76    0.49 
  21   5   1    0.45    0.44 
  23  -5   1    6.95    0.88 
  23   5   1    5.94    1.00 
  25  -5   1    6.01    0.88 
  25  -5   1    4.84    0.95 
  25   5   1    6.48    1.07 
  27  -5   1    3.22    0.71 
  27   5   1    1.36    0.67 
  27  -5   1    2.95    0.80 
  29  -5   1   -0.52    0.47 
  29  -5   1    0.10    0.54 
  29   5   1   -0.11    0.54 
  31  -5   1    3.39    0.81 
  31  -5   1    3.41    0.91 
  31   5   1    2.10    0.83 
  33   5   1    0.43    0.67 
  33  -5   1   -0.12    0.60 
  35  -5   1    8.04    1.35 
  35   5   1    9.99    1.55 
  37   5   1   16.89    1.97 
  37  -5   1   15.93    1.91 
  39  -5   1    4.38    1.32 
  39   5   1    5.74    1.32 
  41  -5   1   -0.42    0.84 
  41   5   1   -0.89    0.77 
  43  -5   1    0.29    0.84 
  43   5   1   -0.05    0.90 
  45   5   1    0.11    0.89 
  46   6  -1    1.35    1.07 
  44   6  -1   -0.42    0.78 
  44  -6  -1    1.40    1.02 
  42   6  -1   16.12    2.06 
  42  -6  -1   16.68    2.08 
  40  -6  -1   -1.24    0.62 
  40   6  -1    0.13    0.78 
  38  -6  -1  113.08    4.41 
  38   6  -1  111.47    4.22 
  36   6  -1    7.15    1.32 
  36  -6  -1    5.18    1.20 
  34  -6  -1    3.49    1.04 
  34  -6  -1    4.31    0.91 
  34   6  -1    2.17    0.92 
  32  -6  -1    7.95    1.11 
  32   6  -1    7.11    1.15 
  32  -6  -1    5.33    1.16 
  30  -6  -1   46.66    2.12 
  30  -6  -1   46.48    2.44 
  30   6  -1   50.07    2.49 
  28  -6  -1   -0.70    0.50 
  28   6  -1    0.33    0.58 
  26   6  -1  210.53    5.00 
  26  -6  -1  222.51    4.71 
  24  -6  -1    2.55    0.69 
  24   6  -1    2.66    0.71 
  22   6  -1    4.86    0.84 
  22  -6  -1    3.70    0.71 
  20   6  -1    1.96    0.58 
  18  -6  -1  105.87    2.81 
  18   6  -1  108.08    2.89 
  16   6  -1    3.24    0.58 
  16  -6  -1    3.24    0.63 
 -14  -6   1  762.00    9.67 
  14   6  -1  783.92   11.22 
  14  -6  -1  787.21   11.17 
  12  -6  -1    9.43    0.89 
  12   6  -1    9.38    0.74 
 -12  -6   1    8.62    0.44 
  12   6  -1    6.88    0.71 
 -10  -6   1    6.98    0.47 
  10   6  -1    6.11    0.65 
  10  -6  -1    4.50    0.61 
  10   6  -1    6.14    0.66 
  -8  -6   1  178.37    2.98 
   8   6  -1  185.79    3.27 
   8   6  -1  185.29    3.39 
   8  -6  -1  187.17    3.54 
   6   6  -1   72.58    1.73 
   6  -6  -1   73.88    1.92 
   6   6  -1   76.45    1.81 
  -6  -6   1   76.18    1.67 
   4  -6  -1    9.41    0.72 
  -4  -6   1    9.37    0.63 
   4   6  -1    8.74    0.61 
   4   6  -1    8.77    0.60 
   2   6  -1  679.72    9.25 
  -2  -6   1  675.27    9.23 
   2   6  -1  678.83    8.94 
  -2   6   1  683.33    9.46 
   2  -6  -1  665.66    9.29 
   0  -6   1   51.55    1.48 
   0   6   1   51.59    1.49 
   0   6  -1   52.08    1.39 
   0   6   1   52.34    1.20 
   0  -6  -1   53.57    1.44 
   0   6  -1   52.21    1.38 
  -2  -6  -1  104.64    2.09 
   2   6   1   98.63    2.22 
   2   6   1  101.79    1.86 
   2  -6   1  103.29    2.28 
   4  -6   1   52.25    1.59 
   4   6   1   50.26    1.52 
   4   6   1   51.84    1.24 
  -4  -6  -1   51.49    1.31 
  -6  -6  -1    0.85    0.26 
   6   6   1    0.67    0.25 
   6   6   1    0.38    0.28 
   6  -6   1    1.14    0.41 
   8  -6   1   68.60    1.95 
   8   6   1   67.62    1.65 
  -8  -6  -1   69.89    1.43 
   8   6   1   72.42    1.98 
  10  -6   1  583.35    8.56 
  10   6   1  566.74    8.64 
 -10  -6  -1  567.54    7.43 
 -12  -6  -1  114.55    1.81 
  12   6   1  121.65    2.90 
  12  -6   1  113.53    2.78 
  14  -6   1    8.16    0.85 
  14   6   1    8.72    0.92 
  16   6   1  179.93    3.99 
  16  -6   1  179.15    3.81 
  18  -6   1    0.11    0.46 
  18   6   1    0.65    0.50 
  20  -6   1   65.73    2.24 
  20   6   1   67.80    2.44 
  22  -6   1  186.41    4.17 
  22   6   1  190.02    4.55 
  24  -6   1   -0.51    0.46 
  24   6   1   -0.02    0.53 
  26  -6   1    7.42    1.14 
  26   6   1    7.58    1.18 
  26  -6   1    6.66    0.97 
  28  -6   1   51.87    2.54 
  28  -6   1   51.51    2.20 
  28   6   1   51.69    2.50 
  30  -6   1    0.72    0.66 
  30  -6   1    1.29    0.68 
  30   6   1    1.65    0.83 
  32  -6   1   50.34    2.27 
  32   6   1   51.61    2.75 
  32  -6   1   52.06    2.75 
  34   6   1   66.35    3.19 
  34  -6   1   69.29    3.25 
  36   6   1   -0.27    0.74 
  36  -6   1   -0.20    0.65 
  38  -6   1    1.63    0.96 
  38   6   1    0.44    0.71 
  40   6   1    9.75    1.63 
  40  -6   1   13.70    1.93 
  42  -6   1    4.88    1.41 
  42   6   1    6.09    1.46 
  44   6   1   10.56    1.88 
  44  -6   1   10.63    2.10 
  45   7  -1    1.50    1.00 
  43  -7  -1    9.47    1.78 
  43   7  -1    8.90    1.57 
  41  -7  -1   61.19    3.38 
  41   7  -1   58.78    3.27 
  39   7  -1    2.51    0.99 
  39  -7  -1    5.07    1.30 
  37  -7  -1   25.87    2.25 
  37   7  -1   22.91    2.07 
  35   7  -1    0.56    0.72 
  35  -7  -1   -0.15    0.73 
  35  -7  -1   -0.23    0.64 
  33  -7  -1   -1.14    0.51 
  33   7  -1   -0.34    0.65 
  33  -7  -1    0.10    0.60 
  31  -7  -1    4.49    0.97 
  31  -7  -1    5.31    1.07 
  31   7  -1    6.44    1.13 
  29  -7  -1  292.10    6.01 
  29   7  -1  286.52    6.39 
  27  -7  -1   18.71    1.44 
  27   7  -1   18.05    1.54 
  25   7  -1   20.78    1.53 
  25  -7  -1   20.37    1.44 
  23   7  -1   10.13    1.13 
  23  -7  -1    7.98    0.99 
  21   7  -1    0.17    0.44 
  21  -7  -1   -0.10    0.45 
  19   7  -1    0.26    0.41 
  19  -7  -1    0.91    0.52 
  17   7  -1 1123.62   15.01 
  17   7  -1 1064.48   15.51 
  17  -7  -1 1113.03   15.47 
  15  -7  -1    1.69    0.55 
  15   7  -1    1.44    0.51 
 -15  -7   1    2.33    0.26 
  15   7  -1    2.07    0.52 
  13  -7  -1   13.96    1.02 
  13   7  -1   16.73    1.04 
 -13  -7   1   15.64    0.63 
  13   7  -1   17.28    1.01 
  11   7  -1   82.77    2.11 
  11   7  -1   83.80    2.22 
  11  -7  -1   84.32    2.35 
 -11  -7   1   83.39    1.73 
   9   7  -1    3.12    0.49 
   9   7  -1    2.90    0.50 
  -9  -7   1    2.85    0.40 
   9  -7  -1    4.13    0.62 
   7   7  -1    2.41    0.42 
   7   7  -1    2.74    0.48 
  -7  -7   1    3.64    0.46 
   7  -7  -1    2.98    0.52 
  -5  -7   1 2279.75   29.61 
   5  -7  -1 2336.35   29.11 
   5   7  -1 2297.98   28.07 
   5   7  -1 2289.92   29.24 
   3  -7  -1   -0.21    0.27 
   3   7  -1   -0.59    0.21 
  -3  -7   1    0.07    0.28 
   3   7  -1   -0.57    0.24 
  -3   7   1   -0.21    0.22 
  -1  -7   1    4.97    0.58 
   1   7  -1    6.10    0.59 
  -1   7   1    6.46    0.65 
   1  -7  -1    4.70    0.54 
  -1   7   1    5.88    0.50 
   1   7  -1    4.97    0.54 
   1   7   1  102.40    2.37 
  -1   7  -1  106.17    2.29 
  -1  -7  -1  103.29    2.26 
   1  -7   1  107.48    2.43 
   1   7   1  105.20    2.00 
   3   7   1    6.78    0.69 
   3   7   1    7.77    0.53 
   3  -7   1    6.96    0.70 
  -3  -7  -1    8.73    0.62 
   5   7   1    0.86    0.28 
  -5  -7  -1    1.18    0.31 
   5  -7   1    1.46    0.46 
   5   7   1    0.15    0.34 
  -7  -7  -1 1914.97   24.61 
   7   7   1 1970.53   25.14 
   7  -7   1 1878.03   24.78 
   7   7   1 1939.59   23.60 
   9   7   1    2.99    0.48 
   9   7   1    2.22    0.52 
  -9  -7  -1    2.64    0.36 
   9  -7   1    2.58    0.53 
  11  -7   1  103.91    2.73 
  11   7   1  110.90    2.78 
  11   7   1  110.11    2.42 
 -11  -7  -1  107.54    1.94 
  13  -7   1  166.00    3.68 
  13   7   1  170.21    3.76 
 -13  -7  -1  163.14    2.53 
  15  -7   1    0.36    0.38 
  15   7   1   -0.07    0.35 
  17  -7   1    0.85    0.57 
  17   7   1    0.45    0.53 
  19   7   1 1092.75   15.92 
  19  -7   1 1081.65   15.43 
  21  -7   1    0.38    0.53 
  21   7   1    0.09    0.49 
  23   7   1   10.99    1.27 
  23  -7   1    9.43    1.10 
  25   7   1  100.09    3.36 
  25  -7   1  102.68    3.13 
  27   7   1   12.84    1.42 
  27  -7   1   12.26    1.31 
  29  -7   1   17.55    1.49 
  29   7   1   19.95    1.73 
  29  -7   1   20.67    1.70 
  31   7   1  443.46    9.00 
  31  -7   1  449.44    8.22 
  31  -7   1  448.79    9.10 
  33  -7   1    1.29    0.68 
  33  -7   1   -0.24    0.53 
  33   7   1   -0.11    0.74 
  35   7   1   13.52    1.81 
  35  -7   1   12.30    1.69 
  37  -7   1   22.25    2.36 
  37   7   1   17.73    1.98 
  39   7   1    6.09    1.37 
  39  -7   1    6.86    1.50 
  41   7   1    0.55    0.89 
  41  -7   1   -0.16    0.69 
  43   7   1   92.06    4.32 
  43  -7   1   91.44    4.38 
  44   8  -1   31.13    2.60 
  42   8  -1    1.24    0.98 
  42  -8  -1    1.38    1.06 
  40   8  -1    1.07    0.86 
  40  -8  -1   -0.57    0.74 
  38   8  -1  112.04    4.29 
  38  -8  -1  119.25    4.60 
  36  -8  -1    4.06    1.10 
  36   8  -1    3.84    1.08 
  36  -8  -1    3.76    1.01 
  34  -8  -1   -0.08    0.63 
  34  -8  -1    0.22    0.70 
  34   8  -1   -0.13    0.58 
  32  -8  -1   78.10    3.03 
  32   8  -1   80.17    3.26 
  30  -8  -1   19.88    1.71 
  30   8  -1   21.26    1.73 
  28   8  -1    8.01    1.28 
  28  -8  -1    9.52    1.25 
  26   8  -1  304.46    6.43 
  26  -8  -1  307.31    6.21 
  24   8  -1   22.35    1.58 
  24  -8  -1   21.81    1.57 
  22   8  -1   10.21    1.18 
  22  -8  -1    6.94    0.97 
  20   8  -1  149.96    3.63 
  20   8  -1  157.20    3.84 
  20  -8  -1  148.39    3.76 
  18   8  -1   16.81    1.16 
  18   8  -1   15.85    1.20 
  18  -8  -1   14.92    1.18 
  16   8  -1   13.78    1.07 
  16   8  -1   13.27    1.03 
 -16  -8   1   13.61    0.54 
  16  -8  -1   13.76    1.27 
  14   8  -1  520.08    8.22 
  14   8  -1  520.22    7.87 
 -14  -8   1  509.13    6.99 
  14  -8  -1  511.28    8.31 
 -12  -8   1    1.10    0.30 
  12   8  -1    0.68    0.41 
  12   8  -1    0.74    0.43 
  12  -8  -1    0.20    0.42 
 -10  -8   1    5.33    0.54 
  10   8  -1    5.83    0.68 
  10   8  -1    5.23    0.68 
  10  -8  -1    4.07    0.71 
   8   8  -1  120.13    2.60 
   8  -8  -1  114.25    2.85 
  -8  -8   1  121.36    2.48 
   8   8  -1  122.04    2.73 
   6   8  -1    0.15    0.28 
  -6  -8   1    0.04    0.27 
   6  -8  -1    0.11    0.31 
   6   8  -1   -0.11    0.25 
   4   8  -1    2.79    0.49 
   4   8  -1    2.97    0.49 
  -4  -8   1    2.80    0.51 
   4  -8  -1    2.61    0.54 
   2   8  -1  942.68   13.01 
  -2   8   1  958.12   13.25 
  -2  -8   1  965.79   13.01 
   2   8  -1  961.87   12.55 
   2  -8  -1  953.24   13.07 
   0   8   1    6.73    0.60 
   0  -8  -1    4.97    0.63 
   0   8  -1    4.71    0.57 
   0   8  -1    4.74    0.59 
   0  -8   1    5.80    0.72 
   0   8   1    4.63    0.59 
   2   8   1   14.44    0.73 
  -2  -8  -1   14.46    0.86 
   2  -8   1   14.58    0.96 
   2   8   1   15.22    0.95 
   4   8   1   34.85    1.13 
   4   8   1   32.95    1.36 
  -4  -8  -1   35.82    1.26 
   4  -8   1   33.78    1.41 
   6   8   1   12.23    0.71 
   6   8   1   13.56    0.94 
  -6  -8  -1   13.89    0.78 
   8  -8   1    9.30    0.96 
  -8  -8  -1    8.34    0.62 
   8   8   1    9.01    0.66 
   8   8   1    7.54    0.80 
  10  -8   1  148.74    3.46 
 -10  -8  -1  153.10    2.71 
  10   8   1  148.01    3.42 
  10   8   1  154.99    3.03 
 -12  -8  -1   22.18    0.82 
  12  -8   1   19.45    1.28 
  12   8   1   23.10    1.12 
  12   8   1   21.66    1.28 
  14   8   1    0.09    0.31 
  14  -8   1    0.02    0.46 
 -14  -8  -1    0.13    0.20 
  14   8   1   -0.02    0.37 
  16  -8   1   11.58    1.16 
  16   8   1   10.33    1.11 
  18   8   1   13.65    1.20 
  18  -8   1   16.37    1.31 
  20  -8   1    9.68    1.13 
  20   8   1    9.83    1.17 
  22   8   1   18.77    1.49 
  22  -8   1   22.84    1.56 
  24   8   1   28.27    1.77 
  24  -8   1   28.16    1.77 
  26  -8   1   16.25    1.43 
  26   8   1   14.71    1.55 
  28   8   1    7.99    1.29 
  28  -8   1    7.35    1.12 
  30  -8   1   12.79    1.61 
  30   8   1   14.68    1.76 
  30  -8   1   16.95    1.62 
  32  -8   1    5.83    1.08 
  32   8   1    4.95    1.17 
  32  -8   1    5.01    1.16 
  34   8   1    4.39    1.20 
  34  -8   1    4.70    1.23 
  34  -8   1    3.98    1.03 
  36   8   1   17.26    2.00 
  36  -8   1   13.52    1.89 
  38  -8   1   -0.60    0.68 
  38   8   1    0.87    0.93 
  40  -8   1   17.82    2.23 
  40   8   1   20.95    2.37 
  42  -8   1    9.35    1.71 
  42   8   1    4.60    1.32 
  43   9  -1   13.43    1.96 
  43  -9  -1   16.98    3.44 
  43   9  -1   11.80    1.78 
  41  -9  -1   -0.91    0.69 
  41   9  -1   -1.10    0.72 
  41   9  -1   -0.81    0.62 
  39   9  -1    2.75    1.04 
  39  -9  -1    1.48    0.96 
  37  -9  -1    2.94    1.08 
  37   9  -1    4.52    1.15 
  37  -9  -1    4.40    1.14 
  35  -9  -1    2.61    0.93 
  35   9  -1    1.88    0.92 
  35  -9  -1    2.10    1.01 
  33  -9  -1    0.52    0.70 
  33   9  -1    0.81    0.72 
  31   9  -1   23.84    1.93 
  31  -9  -1   22.94    1.84 
  29  -9  -1    9.64    1.34 
  29   9  -1    9.09    1.25 
  29   9  -1    9.32    1.32 
  27  -9  -1   26.72    1.85 
  27   9  -1   31.33    1.87 
  27   9  -1   27.63    1.88 
  25  -9  -1    2.69    0.83 
  25   9  -1    3.88    0.85 
  25   9  -1    2.75    0.81 
  23   9  -1  118.13    3.52 
  23  -9  -1  119.35    3.54 
  23   9  -1  120.31    3.39 
  21   9  -1    0.52    0.56 
  21   9  -1    1.29    0.56 
  21  -9  -1    1.60    0.71 
  19   9  -1   59.29    2.29 
  19   9  -1   62.40    2.22 
  19  -9  -1   58.87    2.36 
  17   9  -1   62.81    2.13 
  17  -9  -1   58.38    2.29 
  17   9  -1   58.59    2.17 
  15   9  -1    2.70    0.65 
  15   9  -1    2.84    0.59 
 -15  -9   1    3.28    0.41 
  15  -9  -1    2.37    0.63 
  13  -9  -1    4.54    0.77 
 -13  -9   1    5.29    0.57 
  13   9  -1    4.62    0.68 
  13   9  -1    4.69    0.75 
 -11  -9   1  305.47    4.95 
  11   9  -1  315.57    5.33 
  11  -9  -1  314.38    5.81 
  11   9  -1  312.55    5.58 
   9  -9  -1   27.38    1.45 
  -9  -9   1   26.81    1.13 
   9   9  -1   27.27    1.23 
   9   9  -1   26.90    1.29 
   7   9  -1    5.98    0.71 
  -7  -9   1    7.55    0.75 
   7  -9  -1    5.52    0.80 
   7   9  -1    7.54    0.75 
   5  -9  -1   14.92    1.03 
   5   9  -1   16.10    0.92 
  -5  -9   1   14.05    0.91 
   5   9  -1   14.38    0.93 
   3  -9  -1    8.33    0.83 
  -3   9   1   10.87    0.89 
  -3  -9   1   11.53    0.90 
   3   9  -1   12.01    0.84 
   3   9  -1   10.60    0.77 
   1  -9  -1   15.97    1.02 
  -1  -9   1   15.42    1.02 
   1   9  -1   17.15    0.98 
  -1   9   1   17.05    1.07 
   1   9  -1   17.28    0.98 
  -1  -9  -1  917.50   12.34 
  -1   9  -1  861.09   12.36 
   1   9   1  879.95   11.56 
   1   9   1  883.86   12.59 
   1  -9   1  889.76   12.49 
   3  -9   1   69.42    2.17 
   3   9   1   72.92    1.80 
   3   9   1   76.87    2.21 
  -3  -9  -1   73.11    2.01 
   5  -9   1    1.57    0.50 
  -5  -9  -1    1.94    0.44 
   5   9   1    1.56    0.50 
   5   9   1    2.90    0.48 
  -7  -9  -1  126.40    2.64 
   7   9   1  124.92    2.60 
   7   9   1  129.12    3.10 
   7  -9   1  125.37    3.15 
   9   9   1    2.52    0.58 
   9  -9   1    2.84    0.65 
   9   9   1    3.41    0.52 
  -9  -9  -1    3.76    0.51 
 -11  -9  -1    3.55    0.48 
  11   9   1    3.47    0.57 
  11  -9   1    2.98    0.74 
  11   9   1    4.57    0.76 
 -13  -9  -1  325.12    4.90 
  13  -9   1  326.75    6.15 
  13   9   1  340.44    6.21 
  13   9   1  323.22    5.49 
  15   9   1    0.60    0.43 
  15   9   1   -0.31    0.42 
  15  -9   1    0.90    0.55 
  17   9   1    2.13    0.69 
  17  -9   1    2.30    0.67 
  17   9   1    1.91    0.56 
  19   9   1  148.14    3.57 
  19  -9   1  149.47    3.92 
  19   9   1  145.28    3.93 
  21   9   1    0.18    0.54 
  21  -9   1   -0.35    0.50 
  23  -9   1   -0.72    0.50 
  23   9   1   -0.55    0.55 
  25  -9   1  184.88    4.66 
  25   9   1  182.97    4.84 
  27  -9   1    6.87    1.15 
  27   9   1    6.95    1.21 
  29   9   1    3.66    1.04 
  29  -9   1    2.52    0.91 
  31  -9   1   45.29    2.45 
  31   9   1   39.38    2.48 
  31  -9   1   48.74    2.72 
  33  -9   1    0.34    0.77 
  33   9   1   -0.10    0.73 
  33  -9   1    0.78    0.74 
  35  -9   1    1.00    0.78 
  35   9   1    1.51    0.85 
  35  -9   1    0.69    0.82 
  37   9   1   33.45    2.46 
  37  -9   1   42.51    2.87 
  39  -9   1    0.02    0.82 
  39   9   1    0.00    0.80 
  41   9   1    1.60    1.06 
  41  -9   1    0.74    0.92 
  43   9   1    9.82    1.96 
  44  10  -1   16.05    2.40 
  42  10  -1   18.17    2.19 
  42  10  -1   16.77    2.17 
  42 -10  -1   15.62    3.45 
  40  10  -1    0.83    0.84 
  40 -10  -1    1.63    0.96 
  40  10  -1   -0.44    0.72 
  38 -10  -1    2.22    1.05 
  38  10  -1    1.31    0.90 
  38 -10  -1    2.09    1.37 
  38  10  -1    0.36    0.84 
  36 -10  -1    3.68    1.20 
  36  10  -1    3.53    1.05 
  36  10  -1    4.57    1.16 
  36 -10  -1    3.05    1.13 
  34 -10  -1    4.06    1.10 
  34  10  -1    2.83    0.91 
  34  10  -1    2.20    0.92 
  32  10  -1   42.84    2.42 
  32  10  -1   42.68    2.50 
  32 -10  -1   41.31    2.41 
  30  10  -1   26.90    2.03 
  30  10  -1   28.38    1.97 
  30 -10  -1   29.43    2.06 
  28 -10  -1    7.35    1.25 
  28  10  -1    4.40    0.99 
  28  10  -1    5.71    1.12 
  26  10  -1   90.27    3.26 
  26 -10  -1   90.45    3.29 
  26  10  -1   89.71    3.11 
  24 -10  -1    5.48    1.10 
  24  10  -1    6.73    1.12 
  24  10  -1    5.25    0.98 
  22  10  -1   34.66    1.84 
  22 -10  -1   33.33    1.95 
  22  10  -1   35.85    1.95 
  20 -10  -1  179.23    4.48 
  20  10  -1  178.05    4.35 
  20  10  -1  173.06    4.12 
  18  10  -1   42.21    1.86 
  18 -10  -1   39.43    2.01 
  18  10  -1   46.26    2.04 
  16 -10  -1    6.91    1.02 
  16  10  -1    8.69    1.07 
  16  10  -1    7.94    0.93 
  14  10  -1    3.43    0.69 
  14  10  -1    3.75    0.69 
  14 -10  -1    3.05    0.73 
 -14 -10   1    3.56    0.51 
  12  10  -1    7.70    0.90 
  12  10  -1    8.00    0.90 
 -12 -10   1    8.23    0.78 
  12 -10  -1    7.56    1.03 
 -10 -10   1   58.76    1.79 
  10  10  -1   56.94    2.01 
  10  10  -1   60.89    1.96 
  10 -10  -1   61.80    2.25 
   8 -10  -1  230.84    4.79 
  -8 -10   1  237.17    4.31 
   8  10  -1  232.25    4.31 
   8  10  -1  234.21    4.55 
   6 -10  -1   80.34    2.49 
   6  10  -1   86.33    2.38 
  -6 -10   1   86.40    2.32 
   6  10  -1   87.53    2.29 
  -4 -10   1   28.82    1.35 
   4  10  -1   27.63    1.33 
   4 -10  -1   26.64    1.39 
   4  10  -1   28.17    1.25 
   2 -10  -1  363.05    6.26 
  -2 -10   1  371.21    6.21 
   2  10  -1  367.14    5.87 
   2  10  -1  366.27    6.13 
  -2  10   1  361.66    6.29 
   0 -10  -1   72.88    2.19 
   0 -10   1   72.31    2.26 
   0  10   1   76.56    2.29 
   0  10  -1   73.13    2.09 
   0  10   1   73.94    1.91 
   0  10  -1   71.19    2.13 
  -2 -10  -1   46.36    1.70 
   2  10   1   47.04    1.49 
   2  10   1   44.61    1.73 
   2 -10   1   47.81    1.86 
   4  10   1  122.81    3.07 
  -4 -10  -1  125.31    2.86 
   4  10   1  126.93    2.65 
   4 -10   1  125.31    3.18 
   6  10   1   27.35    1.42 
   6 -10   1   28.02    1.52 
   6  10   1   28.07    1.18 
  -6 -10  -1   28.48    1.26 
   8  10   1   46.91    1.58 
  -8 -10  -1   50.80    1.62 
   8 -10   1   49.31    2.02 
   8  10   1   50.34    1.95 
 -10 -10  -1   41.46    1.41 
  10  10   1   40.98    1.82 
  10  10   1   40.57    1.51 
  10 -10   1   40.38    1.88 
  12 -10   1   40.84    1.94 
  12  10   1   43.63    1.62 
  12  10   1   44.62    1.95 
 -12 -10  -1   43.50    1.39 
  14 -10   1   18.20    1.43 
  14  10   1   20.91    1.24 
  14  10   1   20.69    1.42 
  16 -10   1   53.95    2.30 
  16  10   1   50.94    1.92 
  16  10   1   46.80    2.12 
  18  10   1   21.72    1.56 
  18 -10   1   17.67    1.44 
  18  10   1   20.95    1.32 
  20  10   1   72.46    2.49 
  20  10   1   68.28    2.68 
  20 -10   1   73.66    2.81 
  22 -10   1  143.84    4.10 
  22  10   1  147.04    4.19 
  22  10   1  149.99    3.80 
  24  10   1   30.50    1.97 
  24  10   1   31.97    1.80 
  24 -10   1   33.40    2.04 
  26  10   1    4.65    0.96 
  26  10   1    4.22    1.05 
  26 -10   1    4.83    1.08 
  28  10   1   59.05    2.83 
  28 -10   1   64.83    2.83 
  30 -10   1    6.61    1.27 
  30  10   1    5.70    1.17 
  32 -10   1   19.62    1.95 
  32  10   1   20.42    2.09 
  34 -10   1   45.78    2.84 
  34 -10   1   46.99    2.65 
  34  10   1   43.11    2.66 
  36 -10   1    9.02    1.48 
  36 -10   1    6.62    1.41 
  36  10   1    6.67    1.48 
  38  10   1    1.62    1.02 
  38 -10   1   -0.86    0.77 
  40 -10   1    2.46    1.17 
  40  10   1    2.47    1.09 
  42  10   1    0.65    0.92 
  43  11  -1   -1.03    0.77 
  41 -11  -1   58.37    5.13 
  41  11  -1   54.21    3.10 
  41  11  -1   55.34    3.29 
  39 -11  -1    4.61    1.27 
  39  11  -1    6.82    1.42 
  39  11  -1    5.07    1.36 
  37 -11  -1    2.58    1.08 
  37  11  -1    1.87    0.96 
  37  11  -1    0.97    0.92 
  37 -11  -1    0.07    0.86 
  35  11  -1    0.33    0.76 
  35 -11  -1    0.76    0.91 
  35  11  -1    1.07    0.85 
  33 -11  -1    1.82    0.94 
  33  11  -1    2.70    0.92 
  33  11  -1    4.19    1.10 
  31  11  -1    1.00    0.71 
  31 -11  -1   -0.83    0.76 
  31  11  -1    0.66    0.77 
  29  11  -1  130.95    4.04 
  29 -11  -1  132.69    4.25 
  29  11  -1  129.43    4.22 
  27 -11  -1   15.17    1.72 
  27  11  -1   15.29    1.64 
  27  11  -1   13.94    1.51 
  25  11  -1    0.03    0.58 
  25  11  -1    0.14    0.55 
  25 -11  -1    0.09    0.70 
  23 -11  -1   19.88    1.65 
  23  11  -1   17.86    1.44 
  23  11  -1   18.34    1.54 
  21 -11  -1    0.75    0.69 
  21  11  -1    0.17    0.51 
  21  11  -1    0.57    0.58 
  19  11  -1    3.96    0.81 
  19  11  -1    3.94    0.88 
  19 -11  -1    4.65    0.99 
  17  11  -1  254.98    5.38 
  17  11  -1  256.93    5.18 
  17 -11  -1  255.29    5.63 
  15  11  -1   19.82    1.31 
  15  11  -1   18.68    1.37 
  15 -11  -1   19.56    1.51 
  13  11  -1    8.15    0.98 
  13  11  -1    9.24    0.98 
 -13 -11   1    9.79    0.82 
  13 -11  -1    9.33    1.11 
 -11 -11   1    4.75    0.65 
  11 -11  -1    5.13    0.86 
  11  11  -1    5.24    0.78 
  11  11  -1    5.89    0.79 
  -9 -11   1    1.59    0.50 
   9  11  -1    0.78    0.45 
   9 -11  -1    1.62    0.60 
   9  11  -1    1.52    0.52 
   7  11  -1   10.49    1.03 
   7  11  -1    9.01    0.92 
   7 -11  -1   10.17    1.13 
   5  11  -1  893.10   12.95 
  -5 -11   1  906.34   12.79 
   5 -11  -1  906.76   13.17 
   5  11  -1  884.71   12.34 
  -3 -11   1    1.96    0.59 
   3  11  -1    0.95    0.53 
  -3  11   1    1.75    0.54 
   3 -11  -1    1.48    0.58 
   3  11  -1    1.44    0.53 
   1  11  -1   10.12    0.97 
  -1  11   1   12.66    1.01 
   1 -11  -1   11.19    1.08 
   1  11  -1   12.11    1.00 
  -1 -11   1    9.63    0.99 
   1 -11   1   54.24    2.05 
   1  11   1   56.56    2.05 
  -1 -11  -1   54.08    1.94 
   1  11   1   54.93    1.70 
   3  11   1    1.25    0.43 
   3  11   1    0.86    0.49 
   3 -11   1    0.60    0.54 
  -3 -11  -1    2.05    0.57 
  -5 -11  -1   10.26    0.95 
   5  11   1   11.70    0.87 
   5  11   1    8.90    1.01 
   5 -11   1   10.56    1.16 
  -7 -11  -1  716.22   10.39 
   7  11   1  733.27   10.14 
   7 -11   1  714.72   11.17 
   7  11   1  722.51   11.12 
   9 -11   1    1.74    0.66 
  -9 -11  -1    0.18    0.39 
   9  11   1    0.08    0.43 
   9  11   1    0.65    0.42 
  11 -11   1   35.82    1.87 
  11  11   1   40.17    1.84 
  11  11   1   41.71    1.62 
 -11 -11  -1   38.49    1.44 
  13  11   1   -0.03    0.43 
  13  11   1   -0.33    0.46 
 -13 -11  -1    3.43    0.58 
  13 -11   1    0.97    0.61 
  15 -11   1   13.98    1.42 
  15  11   1   17.27    1.39 
  15  11   1   17.00    1.19 
  17 -11   1   10.46    1.38 
  17  11   1    9.57    1.21 
  17  11   1    9.79    1.04 
  19  11   1  333.25    6.80 
  19  11   1  331.86    6.14 
  19 -11   1  325.22    6.77 
  21  11   1    0.15    0.50 
  21  11   1   -0.95    0.56 
  21 -11   1    0.49    0.70 
  23 -11   1   27.96    1.98 
  23  11   1   28.58    1.70 
  23  11   1   28.77    1.99 
  25  11   1    4.48    1.04 
  25 -11   1    3.95    1.00 
  25  11   1    5.58    0.98 
  27  11   1    1.73    0.76 
  27  11   1    3.93    0.98 
  27 -11   1    2.16    0.95 
  29 -11   1    7.09    1.33 
  29  11   1    6.82    1.29 
  29  11   1    6.49    1.19 
  31 -11   1  104.59    3.84 
  31  11   1  103.91    3.66 
  31  11   1  109.64    4.12 
  33  11   1    0.41    0.71 
  33 -11   1    0.47    0.75 
  33  11   1   -0.82    0.71 
  35  11   1   12.23    1.64 
  35  11   1   13.62    1.92 
  35 -11   1   12.99    1.86 
  35 -11   1   12.21    1.69 
  37 -11   1    3.58    1.23 
  37  11   1    4.34    1.18 
  37 -11   1    3.71    1.13 
  37  11   1    3.70    1.11 
  39 -11   1    7.23    1.60 
  39  11   1    6.15    1.31 
  39  11   1    7.18    1.48 
  41  11   1   -0.87    0.70 
  41  11   1   -0.74    0.79 
  42  12  -1    7.15    1.55 
  40  12  -1    1.90    0.90 
  40  12  -1   -0.49    0.93 
  38  12  -1  101.36    4.07 
  38  12  -1   98.25    4.17 
  38 -12  -1  101.71    4.44 
  38 -12  -1  108.25    4.27 
  36  12  -1   18.56    2.04 
  36 -12  -1   16.32    1.99 
  36  12  -1   18.21    2.03 
  34 -12  -1   -1.75    0.69 
  34  12  -1   -0.33    0.68 
  34  12  -1    0.31    0.73 
  32  12  -1   25.40    1.96 
  32  12  -1   25.42    2.04 
  32 -12  -1   23.86    2.10 
  30  12  -1   16.98    1.84 
  30  12  -1   14.81    1.67 
  30 -12  -1   19.81    2.09 
  28 -12  -1   -0.27    0.75 
  28  12  -1   -1.09    0.51 
  28  12  -1   -0.65    0.69 
  26 -12  -1  182.24    5.07 
  26  12  -1  182.12    4.74 
  26  12  -1  175.63    4.87 
  24 -12  -1   10.89    1.51 
  24  12  -1   11.92    1.50 
  24  12  -1   13.00    1.48 
  22  12  -1    0.02    0.51 
  22 -12  -1   -0.46    0.65 
  22  12  -1    0.20    0.58 
  20  12  -1    5.41    0.94 
  20  12  -1    3.81    0.86 
  20 -12  -1    4.83    1.06 
  18  12  -1   24.03    1.53 
  18 -12  -1   19.62    1.68 
  18  12  -1   23.85    1.61 
  16  12  -1   -0.79    0.41 
  16  12  -1    0.03    0.49 
  16 -12  -1    0.07    0.58 
  14  12  -1  299.12    5.67 
  14  12  -1  302.64    5.98 
  14 -12  -1  301.09    6.28 
  12 -12  -1   57.83    2.44 
 -12 -12   1   58.42    1.93 
  12  12  -1   58.46    2.25 
  12  12  -1   58.54    2.11 
  10  12  -1    6.13    0.83 
  10  12  -1    8.32    1.02 
 -10 -12   1    6.82    0.86 
  10 -12  -1    6.59    1.03 
  -8 -12   1   10.40    1.05 
   8 -12  -1   11.32    1.26 
   8  12  -1    8.67    1.01 
   8  12  -1   10.59    1.04 
   6  12  -1   12.26    1.06 
  -6 -12   1   11.87    1.15 
   6 -12  -1   14.13    1.25 
   6  12  -1   13.20    1.04 
   4 -12  -1    1.76    0.65 
  -4 -12   1    0.34    0.47 
   4  12  -1    1.53    0.52 
   4  12  -1    0.54    0.45 
  -2  12   1  231.39    4.84 
  -2 -12   1  224.18    4.69 
   2 -12  -1  228.52    4.79 
   2  12  -1  230.73    4.65 
   2  12  -1  226.16    4.44 
   0  12  -1    0.53    0.45 
   0 -12   1    0.84    0.53 
   0  12   1    0.58    0.41 
   0 -12  -1    0.43    0.50 
  -2 -12  -1    9.83    1.02 
   2 -12   1   11.81    1.25 
   2  12   1   10.14    1.08 
   2  12   1    9.93    0.86 
   4  12   1    7.79    0.81 
   4 -12   1    5.97    0.91 
  -4 -12  -1    6.60    0.84 
   4  12   1    8.77    1.01 
   6  12   1   17.21    1.25 
   6 -12   1   15.77    1.28 
  -6 -12  -1   15.78    1.15 
   6  12   1   16.05    1.06 
   8  12   1    5.41    0.75 
  -8 -12  -1    5.60    0.77 
   8  12   1    4.46    0.85 
   8 -12   1    4.00    0.87 
 -10 -12  -1  141.26    3.19 
  10 -12   1  143.63    3.92 
  10  12   1  139.50    3.22 
  10  12   1  146.78    3.81 
 -12 -12  -1    0.15    0.39 
  12  12   1    1.45    0.64 
  12  12   1    1.04    0.49 
  12 -12   1    0.24    0.60 
  14 -12   1    5.44    1.05 
  14  12   1    4.82    0.76 
  14  12   1    4.10    0.85 
  16  12   1    5.44    0.85 
  16  12   1    8.40    1.13 
  16 -12   1    6.31    1.14 
  18 -12   1    1.35    0.79 
  18  12   1    0.36    0.63 
  18  12   1    0.84    0.58 
  20  12   1   18.35    1.39 
  20  12   1   16.59    1.67 
  20 -12   1   16.64    1.69 
  22  12   1   47.74    2.47 
  22  12   1   47.13    2.13 
  22 -12   1   47.07    2.45 
  24 -12   1   -0.02    0.64 
  24  12   1    0.84    0.66 
  24  12   1    0.48    0.62 
  26  12   1   14.79    1.72 
  26  12   1   13.48    1.47 
  26 -12   1   15.31    1.76 
  28  12   1   33.21    2.30 
  28 -12   1   32.70    2.31 
  28  12   1   33.53    2.04 
  30  12   1    0.54    0.83 
  30  12   1   -0.07    0.63 
  30 -12   1    1.32    0.91 
  32 -12   1   15.02    1.80 
  32  12   1   15.35    1.93 
  32  12   1   16.03    1.72 
  34  12   1    6.04    1.22 
  34  12   1    7.77    1.49 
  34 -12   1    4.93    1.32 
  36  12   1    1.63    0.96 
  36  12   1    1.57    1.06 
  36 -12   1    0.53    0.88 
  36 -12   1    2.55    1.14 
  38 -12   1    8.54    1.55 
  38 -12   1    6.72    1.57 
  38  12   1    9.35    1.58 
  38  12   1    7.32    1.47 
  40  12   1    9.06    1.74 
  40  12   1    9.13    1.55 
  41  13  -1    1.42    1.11 
  39 -13  -1   -0.51    0.85 
  39  13  -1    1.33    0.87 
  39  13  -1   -1.09    0.76 
  37  13  -1    6.75    1.42 
  37 -13  -1    5.86    1.46 
  37  13  -1    6.36    1.41 
  35  13  -1    8.33    1.49 
  35 -13  -1    8.83    1.61 
  35  13  -1   10.93    1.74 
  33  13  -1    7.02    1.33 
  33  13  -1    5.52    1.29 
  33 -13  -1    7.60    1.55 
  31  13  -1   12.91    1.64 
  31  13  -1   12.65    1.69 
  31 -13  -1   12.78    1.83 
  29  13  -1   13.35    1.68 
  29 -13  -1   12.50    1.81 
  29  13  -1    9.84    1.41 
  27  13  -1    1.31    0.79 
  27 -13  -1    0.08    0.79 
  27  13  -1    1.45    0.75 
  25 -13  -1    0.74    0.88 
  25  13  -1    1.14    0.71 
  25  13  -1    1.52    0.79 
  23 -13  -1   27.31    2.10 
  23  13  -1   27.62    1.85 
  23  13  -1   31.77    2.06 
  21  13  -1    4.65    0.96 
  21 -13  -1    4.90    1.10 
  21  13  -1    4.36    1.01 
  19  13  -1    1.66    0.72 
  19  13  -1    1.96    0.67 
  19 -13  -1    1.86    0.88 
  17 -13  -1   52.96    2.59 
  17  13  -1   59.23    2.45 
  17  13  -1   57.53    2.28 
  15 -13  -1    6.55    1.11 
  15  13  -1    9.35    1.12 
  15  13  -1    8.75    1.17 
  13 -13  -1    0.95    0.68 
  13  13  -1   -0.24    0.49 
  13  13  -1    0.80    0.64 
 -11 -13   1  178.81    3.95 
  11  13  -1  179.23    4.07 
  11  13  -1  189.84    4.39 
  11 -13  -1  182.71    4.65 
   9  13  -1   11.87    1.20 
   9 -13  -1   10.97    1.25 
   9  13  -1   12.70    1.18 
  -9 -13   1   12.86    1.20 
   7 -13  -1    3.66    0.85 
   7  13  -1    3.96    0.74 
   7  13  -1    3.97    0.80 
  -7 -13   1    3.82    0.77 
   5  13  -1  124.03    3.32 
  -5 -13   1  125.27    3.33 
   5 -13  -1  122.14    3.48 
   5  13  -1  123.11    3.13 
   3 -13  -1    2.22    0.69 
  -3 -13   1    2.42    0.73 
   3  13  -1    3.69    0.76 
   3  13  -1    2.64    0.67 
  -1 -13   1    6.64    0.96 
   1 -13  -1    8.02    1.01 
   1  13  -1    9.65    1.09 
  -1  13   1    8.24    1.08 
   1  13   1  430.26    7.68 
  -1 -13  -1  430.79    7.49 
   1 -13   1  437.68    7.73 
   3 -13   1   11.48    1.27 
   3  13   1   10.11    1.17 
  -3 -13  -1   12.48    1.19 
   3  13   1   12.49    1.11 
   5  13   1    6.46    0.82 
  -5 -13  -1    8.57    1.01 
   5 -13   1    5.26    1.01 
   5  13   1    6.19    0.98 
   7 -13   1  231.73    5.29 
   7  13   1  230.92    5.11 
   7  13   1  237.72    4.48 
  -7 -13  -1  228.69    4.66 
  -9 -13  -1    0.90    0.49 
   9  13   1    0.21    0.46 
   9  13   1    0.32    0.56 
   9 -13   1    1.01    0.74 
  11  13   1    1.36    0.66 
  11 -13   1    1.41    0.77 
 -11 -13  -1    2.41    0.61 
  11  13   1    2.17    0.60 
  13  13   1  197.46    4.85 
  13  13   1  197.91    4.23 
  13 -13   1  201.01    5.03 
  15  13   1   26.42    1.80 
  15  13   1   24.34    1.47 
  15 -13   1   23.72    1.86 
  17 -13   1   11.79    1.49 
  17  13   1   13.29    1.51 
  17  13   1   14.93    1.27 
  19  13   1  110.35    3.25 
  19 -13   1  109.15    3.75 
  19  13   1  116.66    3.76 
  21  13   1   -0.25    0.62 
  21  13   1    0.53    0.60 
  21 -13   1    2.07    0.91 
  23  13   1    2.13    0.78 
  23  13   1    0.63    0.73 
  23 -13   1   -0.03    0.74 
  25  13   1  112.78    3.99 
  25 -13   1  120.20    4.16 
  25  13   1  111.55    3.57 
  27  13   1    0.35    0.63 
  27 -13   1   -0.35    0.78 
  27  13   1    0.17    0.76 
  29  13   1    9.92    1.39 
  29  13   1    9.94    1.58 
  29 -13   1    5.53    1.29 
  31 -13   1   77.25    3.56 
  31  13   1   75.20    3.52 
  31  13   1   82.25    3.32 
  33  13   1   -0.50    0.75 
  33  13   1    0.20    0.68 
  33 -13   1   -0.04    0.88 
  35 -13   1   -0.14    0.96 
  35  13   1    0.73    0.95 
  35  13   1    0.63    0.80 
  37  13   1   45.31    2.77 
  37 -13   1   41.10    3.00 
  37  13   1   43.30    2.97 
  37 -13   1   45.10    2.90 
  39  13   1    0.33    1.03 
  39  13   1    0.35    0.75 
  40 -14  -1   -1.37    0.83 
  40  14  -1   -0.69    1.01 
  38  14  -1    1.72    0.82 
  38  14  -1   -0.12    0.83 
  38 -14  -1    1.96    1.16 
  36  14  -1    0.93    0.87 
  36  14  -1   -0.26    0.90 
  36 -14  -1    0.71    1.03 
  34 -14  -1   10.69    1.79 
  34  14  -1   12.64    1.76 
  34  14  -1   10.24    1.67 
  32  14  -1  108.14    3.99 
  32 -14  -1  117.55    4.46 
  32  14  -1  107.43    4.15 
  30  14  -1    1.18    0.90 
  30  14  -1    2.30    0.92 
  30 -14  -1    0.46    0.90 
  28 -14  -1    4.17    1.22 
  28  14  -1    2.47    0.97 
  28  14  -1    2.20    0.91 
  26  14  -1   10.01    1.43 
  26  14  -1    8.03    1.28 
  26 -14  -1    8.44    1.51 
  24  14  -1   -0.09    0.65 
  24  14  -1   -0.78    0.61 
  24 -14  -1    0.38    0.91 
  22  14  -1   30.38    2.06 
  22  14  -1   34.24    2.00 
  22 -14  -1   29.65    2.24 
  20  14  -1  167.52    4.38 
  20  14  -1  169.14    4.61 
  20 -14  -1  176.97    5.05 
  18  14  -1   -0.07    0.52 
  18 -14  -1    0.98    0.80 
  18  14  -1    0.36    0.61 
  16  14  -1    5.86    1.01 
  16 -14  -1    7.22    1.25 
  16  14  -1    8.25    1.19 
  14  14  -1    3.59    0.81 
  14  14  -1    4.33    0.91 
  14 -14  -1    5.05    1.09 
  12  14  -1    4.08    0.87 
  12  14  -1    2.65    0.76 
  12 -14  -1    2.60    0.92 
  10 -14  -1    9.59    1.30 
  10  14  -1   11.35    1.19 
  10  14  -1   10.19    1.21 
 -10 -14   1   13.61    1.17 
   8  14  -1  241.19    4.90 
  -8 -14   1  240.13    5.01 
   8 -14  -1  233.34    5.43 
   8  14  -1  237.90    5.18 
   6  14  -1   14.54    1.24 
   6 -14  -1   13.53    1.47 
  -6 -14   1   14.46    1.27 
   6  14  -1   14.00    1.36 
   4 -14  -1   27.04    1.72 
  -4 -14   1   29.64    1.71 
   4  14  -1   29.64    1.65 
   4  14  -1   30.94    1.64 
  -2 -14   1    2.45    0.75 
   2  14  -1    2.64    0.69 
   2 -14  -1    1.81    0.68 
   0 -14  -1    0.99    0.61 
   0 -14   1    0.14    0.53 
   0  14   1    0.01    0.47 
  -2 -14  -1   26.28    1.60 
   2  14   1   27.62    1.65 
   2 -14   1   29.78    1.78 
  -4 -14  -1   92.39    2.85 
   4  14   1   88.15    2.95 
   4  14   1   93.27    2.62 
   4 -14   1   88.76    3.08 
   6  14   1   20.79    1.29 
   6 -14   1   21.12    1.65 
   6  14   1   21.40    1.57 
  -6 -14  -1   19.13    1.38 
   8  14   1   22.29    1.34 
   8  14   1   23.69    1.66 
   8 -14   1   24.32    1.77 
  -8 -14  -1   22.62    1.42 
  10  14   1    7.43    1.17 
 -10 -14  -1    5.13    0.82 
  10  14   1    6.89    0.93 
  10 -14   1    6.28    1.14 
  12  14   1   26.76    1.81 
  12 -14   1   25.74    1.93 
  12  14   1   29.45    1.58 
  14  14   1   -0.28    0.63 
  14  14   1    0.50    0.57 
  14 -14   1    0.89    0.75 
  16  14   1   88.14    2.82 
  16  14   1   92.89    3.33 
  16 -14   1   85.97    3.33 
  18 -14   1   14.66    1.67 
  18  14   1   12.76    1.29 
  18  14   1   14.04    1.59 
  20 -14   1   18.57    1.95 
  20  14   1   18.16    1.83 
  20  14   1   19.75    1.51 
  22 -14   1   68.28    3.13 
  22  14   1   70.14    2.74 
  22  14   1   66.19    3.02 
  24  14   1   18.39    1.90 
  24 -14   1   21.90    2.16 
  24  14   1   22.66    1.67 
  26  14   1    0.76    0.77 
  26 -14   1    1.23    0.99 
  26  14   1    1.92    0.77 
  28 -14   1    4.63    1.27 
  28  14   1    2.88    1.08 
  28  14   1    4.80    1.00 
  30  14   1    5.20    1.14 
  30  14   1    6.72    1.45 
  30 -14   1    3.48    1.22 
  32  14   1    8.05    1.50 
  32 -14   1    5.07    1.37 
  32  14   1    8.15    1.36 
  34  14   1   34.73    2.44 
  34 -14   1   36.90    2.75 
  34  14   1   35.18    2.68 
  36  14   1   17.75    2.00 
  36 -14   1   14.59    2.03 
  36  14   1   14.17    1.99 
  36 -14   1   14.96    2.07 
  38 -14   1    0.98    1.03 
  38  14   1    1.96    1.24 
  38  14   1    1.31    0.87 
  37  15  -1    0.59    0.88 
  37 -15  -1   -0.98    0.98 
  37  15  -1    0.59    0.79 
  35  15  -1   15.77    1.99 
  35  15  -1   16.57    2.01 
  35 -15  -1   14.94    2.13 
  33 -15  -1    1.43    1.06 
  33  15  -1   -0.54    0.78 
  33  15  -1    1.05    0.90 
  31  15  -1   10.44    1.62 
  31 -15  -1   10.42    1.71 
  31  15  -1    8.18    1.42 
  29  15  -1   43.99    2.68 
  29 -15  -1   48.73    3.05 
  29  15  -1   45.11    2.54 
  27  15  -1   28.43    2.09 
  27 -15  -1   26.68    2.37 
  27  15  -1   22.80    2.02 
  25  15  -1    8.72    1.42 
  25 -15  -1    8.84    1.57 
  25  15  -1    6.61    1.16 
  23  15  -1   41.00    2.34 
  23 -15  -1   41.27    2.67 
  23  15  -1   38.65    2.19 
  21  15  -1    3.19    0.90 
  21  15  -1    2.57    0.94 
  21 -15  -1    3.28    1.12 
  19  15  -1    8.18    1.28 
  19  15  -1    9.40    1.26 
  19 -15  -1    9.18    1.49 
  17 -15  -1   51.62    2.76 
  17  15  -1   51.19    2.46 
  17  15  -1   45.92    2.20 
  15 -15  -1   14.45    1.65 
  15  15  -1   18.76    1.48 
  15  15  -1   19.37    1.58 
  13 -15  -1   14.90    1.74 
  13  15  -1   13.04    1.39 
  13  15  -1   14.23    1.39 
  11  15  -1  126.35    3.69 
  11  15  -1  129.47    3.52 
  11 -15  -1  125.22    4.04 
   9 -15  -1    1.13    0.83 
  -9 -15   1    1.13    0.62 
   9  15  -1    1.09    0.62 
   9  15  -1    0.62    0.60 
   7  15  -1    1.57    0.64 
   7 -15  -1    1.33    0.81 
  -7 -15   1    1.62    0.69 
   7  15  -1    1.12    0.63 
   5 -15  -1   60.59    2.64 
  -5 -15   1   63.08    2.48 
   5  15  -1   60.96    2.43 
   5  15  -1   61.41    2.34 
  -3 -15   1   12.11    1.35 
   3 -15  -1    8.64    1.22 
   3  15  -1    8.28    1.06 
  -1 -15   1    2.41    0.79 
   1 -15  -1    2.60    0.82 
   1 -15   1  162.34    4.35 
  -1 -15  -1  168.07    4.28 
   1  15   1  170.01    4.38 
   3 -15   1   18.02    1.73 
   3  15   1   16.43    1.46 
  -3 -15  -1   16.27    1.41 
   5  15   1    3.83    0.77 
  -5 -15  -1    2.05    0.74 
   5 -15   1    4.13    0.97 
   5  15   1    4.24    0.95 
   7 -15   1   48.53    2.45 
  -7 -15  -1   49.30    2.13 
   7  15   1   50.13    1.99 
   7  15   1   60.92    2.56 
  -9 -15  -1    2.97    0.75 
   9  15   1    2.77    0.92 
   9  15   1    4.42    0.81 
   9 -15   1    2.91    0.86 
  11 -15   1    1.46    0.78 
  11  15   1    1.69    0.79 
  11  15   1    2.94    0.72 
  13  15   1  192.39    4.39 
  13 -15   1  202.37    5.33 
  13  15   1  193.73    5.02 
  15  15   1    3.88    1.03 
  15 -15   1    5.76    1.22 
  15  15   1    4.43    0.88 
  17 -15   1    0.68    0.79 
  17  15   1   -0.25    0.52 
  17  15   1   -0.04    0.65 
  19  15   1   44.58    2.15 
  19 -15   1   47.91    2.72 
  19  15   1   47.06    2.55 
  21 -15   1    1.85    0.94 
  21  15   1    2.33    0.77 
  21  15   1    1.22    0.85 
  23 -15   1    6.05    1.39 
  23  15   1    5.88    1.08 
  23  15   1    5.99    1.26 
  25 -15   1   30.49    2.45 
  25  15   1   33.97    2.08 
  25  15   1   30.49    2.29 
  27  15   1    6.70    1.33 
  27 -15   1    6.62    1.47 
  27  15   1    5.46    1.11 
  29 -15   1   -1.08    0.83 
  29  15   1   -0.50    0.67 
  29  15   1   -0.62    0.68 
  31  15   1    4.98    1.16 
  31 -15   1    7.95    1.60 
  31  15   1    5.00    1.32 
  33 -15   1   -0.52    0.85 
  33  15   1   -0.43    0.84 
  33  15   1    1.53    1.15 
  35 -15   1   11.65    1.85 
  35  15   1    8.61    1.71 
  37 -15   1   23.77    3.19 
  37  15   1   28.27    4.10 
  36  16  -1   13.99    1.83 
  34  16  -1    1.31    0.86 
  34 -16  -1    0.20    1.11 
  34  16  -1   -0.24    0.85 
  32  16  -1    3.19    1.18 
  32 -16  -1    3.16    1.22 
  32  16  -1    4.58    1.20 
  30 -16  -1   16.21    2.12 
  30  16  -1   15.81    1.91 
  30  16  -1   16.61    1.89 
  28 -16  -1    0.07    0.94 
  28  16  -1    1.42    0.91 
  28  16  -1    0.57    0.92 
  26 -16  -1   41.59    2.84 
  26  16  -1   37.73    2.35 
  26  16  -1   38.89    2.51 
  24 -16  -1   30.78    2.52 
  24  16  -1   32.34    2.07 
  24  16  -1   30.41    2.20 
  22 -16  -1   -0.87    0.82 
  22  16  -1    0.97    0.74 
  22  16  -1    0.36    0.75 
  20  16  -1   12.82    1.52 
  20 -16  -1   13.05    1.81 
  20  16  -1   15.28    1.61 
  18 -16  -1   35.21    2.48 
  18  16  -1   38.07    2.11 
  18  16  -1   37.74    2.29 
  16 -16  -1   10.85    1.62 
  16  16  -1   12.28    1.39 
  16  16  -1   10.22    1.39 
  14 -16  -1   77.51    3.31 
  14  16  -1   67.03    2.67 
  14  16  -1   71.29    2.94 
  12  16  -1   20.83    1.75 
  12 -16  -1   21.21    1.85 
  12  16  -1   22.30    1.60 
  10  16  -1   14.43    1.54 
  10  16  -1   15.43    1.47 
  10 -16  -1   15.50    1.77 
  -8 -16   1    5.78    1.04 
   8 -16  -1    3.32    1.00 
   8  16  -1    4.85    0.94 
   8  16  -1    4.17    0.94 
   6 -16  -1   47.25    2.47 
   6  16  -1   51.65    2.25 
   6  16  -1   48.59    2.27 
  -6 -16   1   48.21    2.30 
  -4 -16   1    6.63    1.09 
   4  16  -1    6.01    1.03 
   4 -16  -1    5.06    1.05 
  -2 -16   1   97.78    3.31 
   2 -16  -1   96.03    3.35 
   0 -16   1   28.95    1.91 
   0  16   1   31.50    1.96 
   0 -16  -1   29.51    1.88 
  -2 -16  -1    5.30    0.99 
   2  16   1    6.50    1.09 
   2 -16   1    7.71    1.23 
  -4 -16  -1   15.73    1.53 
   4 -16   1   16.34    1.70 
   4  16   1   19.06    1.62 
  -6 -16  -1   35.91    1.95 
   6 -16   1   38.12    2.30 
   6  16   1   38.05    2.18 
  -8 -16  -1   43.70    2.32 
   8  16   1   48.35    2.46 
   8 -16   1   45.68    2.53 
  10  16   1   55.46    2.64 
  10 -16   1   55.41    2.80 
  12 -16   1   11.14    1.59 
  12  16   1   12.08    1.50 
  14  16   1   23.11    1.88 
  14 -16   1   25.09    2.10 
  16 -16   1   20.42    2.05 
  16  16   1   26.07    1.99 
  18  16   1   15.47    1.79 
  18 -16   1   14.79    1.82 
  20 -16   1   29.20    2.40 
  20  16   1   27.31    2.18 
  22  16   1   28.77    2.26 
  22 -16   1   29.43    2.44 
  24 -16   1    5.46    1.32 
  24  16   1    5.13    1.20 
  26 -16   1   20.23    2.30 
  26  16   1   17.72    2.01 
  28  16   1    7.19    1.53 
  28 -16   1    5.82    1.44 
  30 -16   1    2.04    1.17 
  30  16   1    2.17    1.11 
  32  16   1   10.79    1.83 
  32 -16   1   11.70    1.90 
  34 -16   1   35.51    2.94 
  34  16   1   34.90    2.75 
  31 -17  -1   -1.77    0.78 
  31  17  -1    0.35    0.87 
  29 -17  -1   11.38    1.93 
  29  17  -1    8.47    1.48 
  29  17  -1    7.29    1.58 
  27 -17  -1   -0.09    1.00 
  27  17  -1   -0.89    0.68 
  27  17  -1   -1.05    0.68 
  25  17  -1    0.08    0.80 
  25 -17  -1    0.78    1.01 
  25  17  -1   -0.46    0.85 
  23 -17  -1   25.33    2.55 
  23  17  -1   26.74    1.97 
  23  17  -1   23.76    2.06 
  21  17  -1    0.25    0.64 
  21  17  -1    0.53    0.76 
  21 -17  -1   -0.36    0.91 
  19 -17  -1    0.62    0.84 
  19  17  -1    0.65    0.69 
  19  17  -1    0.30    0.65 
  17  17  -1   69.08    2.85 
  17  17  -1   79.79    3.22 
  17 -17  -1   75.58    3.51 
  15  17  -1    1.05    0.81 
  15  17  -1    1.03    0.75 
  15 -17  -1    0.48    0.76 
  13  17  -1    9.58    1.40 
  13  17  -1   11.31    1.39 
  13 -17  -1   12.35    1.71 
  11  17  -1   62.76    2.77 
  11 -17  -1   59.82    2.99 
  11  17  -1   58.63    2.50 
   9 -17  -1   -0.59    0.57 
   9  17  -1   -0.40    0.64 
   9  17  -1    0.24    0.63 
   7  17  -1    6.89    1.15 
   7 -17  -1    6.87    1.28 
  -7 -17   1    6.89    1.13 
   7  17  -1    6.03    1.00 
   5 -17  -1   84.59    3.33 
  -5 -17   1   84.66    3.11 
   5  17  -1   86.92    3.16 
   3 -17  -1    1.18    0.82 
  -3 -17   1   -0.02    0.64 
  -1 -17   1   20.09    1.90 
   1 -17  -1   14.92    1.66 
  -1 -17  -1   46.60    2.37 
   1 -17   1   53.64    2.63 
   1  17   1   54.84    2.60 
   3  17   1    2.90    0.94 
   3 -17   1    3.53    1.00 
  -3 -17  -1    2.49    0.82 
  -5 -17  -1    7.98    1.15 
   5  17   1    9.52    1.35 
   5 -17   1    7.49    1.28 
  -7 -17  -1   87.18    4.49 
   7 -17   1   91.61    3.57 
   7  17   1   89.82    3.37 
   9 -17   1    0.97    0.81 
   9  17   1    0.88    0.78 
  11  17   1   25.54    1.99 
  11 -17   1   24.74    2.14 
  13  17   1   93.96    3.57 
  13 -17   1   88.96    3.72 
  15 -17   1    5.91    1.35 
  15  17   1    7.51    1.36 
  17  17   1   24.20    2.09 
  17 -17   1   23.15    2.30 
  19 -17   1   87.61    3.86 
  19  17   1   81.85    3.52 
  21 -17   1    0.20    0.87 
  21  17   1   -0.28    0.74 
  23 -17   1    6.53    1.50 
  23  17   1    6.80    1.35 
  25  17   1   40.68    2.71 
  25 -17   1   36.49    2.84 
  27  17   1    3.80    1.23 
  27 -17   1    8.45    1.71 
  29  17   1   13.87    1.96 
  29 -17   1   16.18    2.25 
  31 -17   1   42.60    3.10 
  31  17   1   40.90    2.92 
  33  17   1   -0.23    0.99 
  30 -18  -1    2.54    1.90 
  28  18  -1    0.88    0.93 
  28 -18  -1    0.62    1.03 
  26  18  -1    5.40    1.28 
  26 -18  -1    6.22    1.54 
  24 -18  -1    7.10    1.58 
  24  18  -1    7.88    1.42 
  22 -18  -1   10.81    1.83 
  22  18  -1   12.74    1.74 
  20  18  -1   76.42    3.35 
  20 -18  -1   82.19    3.87 
  18  18  -1    1.29    0.83 
  18 -18  -1    0.28    1.01 
  16 -18  -1    5.08    1.38 
  16  18  -1    3.86    1.06 
  14 -18  -1   17.07    2.10 
  14  18  -1   15.38    1.69 
  12 -18  -1   13.48    1.87 
  12  18  -1   13.23    1.60 
  10 -18  -1   12.74    1.76 
  10  18  -1   15.33    1.70 
   8  18  -1  132.00    4.12 
   8 -18  -1  135.23    4.52 
   6 -18  -1   -0.42    0.73 
   6  18  -1    1.48    0.82 
  -6 -18   1    1.07    0.71 
  -4 -18   1    2.89    0.93 
   4 -18  -1    2.72    1.02 
   2 -18  -1    0.60    0.76 
  -2 -18   1    0.23    0.70 
   0 -18  -1    0.96    0.78 
   0 -18   1    0.39    0.72 
  -2 -18  -1    1.44    0.75 
   2  18   1    0.31    0.69 
   2 -18   1    0.68    0.74 
  -4 -18  -1   67.73    2.86 
   4 -18   1   67.66    3.13 
   4  18   1   64.96    2.89 
   6 -18   1    1.89    0.98 
   6  18   1    2.04    0.86 
   8  18   1    3.66    1.01 
   8 -18   1    5.09    1.29 
  10  18   1   11.51    1.61 
  10 -18   1   10.65    1.62 
  12 -18   1    1.70    0.99 
  12  18   1    1.14    0.90 
  14 -18   1    0.82    0.92 
  14  18   1   -0.64    0.69 
  16  18   1   18.34    2.00 
  16 -18   1   17.84    2.14 
  18 -18   1   -0.95    0.83 
  18  18   1   -0.02    0.76 
  20 -18   1    3.64    1.34 
  20  18   1    2.67    1.02 
  22  18   1   16.14    1.99 
  22 -18   1   19.24    2.38 
  24  18   1   10.20    1.66 
  24 -18   1    9.74    1.73 
  26 -18   1    6.14    1.61 
  26  18   1    2.64    1.21 
  28 -18   1    1.42    1.23 
  28  18   1    0.21    1.04 
  30  18   1    1.84    1.11 
  25 -19  -1    3.12    1.34 
  23 -19  -1   61.53    3.49 
  23  19  -1   63.94    3.22 
  21  19  -1    0.78    0.91 
  21 -19  -1    0.61    0.97 
  19 -19  -1    3.72    1.31 
  19  19  -1   -0.12    0.79 
  17  19  -1    4.71    1.27 
  17 -19  -1    8.59    1.70 
  15  19  -1   10.40    1.52 
  15 -19  -1    5.91    1.35 
  13  19  -1    0.99    0.79 
  13 -19  -1    1.51    1.05 
  11  19  -1   88.66    3.47 
  11 -19  -1   85.72    3.81 
   9 -19  -1    5.65    1.33 
   9  19  -1    5.83    1.17 
   7 -19  -1   -0.16    0.68 
   7  19  -1   -0.27    0.66 
   5 -19  -1   15.39    1.88 
  -5 -19   1   18.54    1.86 
   3 -19  -1    4.63    1.19 
  -3 -19   1    5.25    1.12 
  -1 -19   1   -0.53    0.67 
   1 -19  -1   -0.60    0.59 
  -1 -19  -1  135.34    4.33 
   1 -19   1  137.82    4.49 
   3  19   1    7.42    1.30 
   3 -19   1    5.99    1.24 
  -3 -19  -1    6.00    1.18 
   5 -19   1    2.08    0.98 
   5  19   1    0.92    0.80 
   7 -19   1    1.51    0.98 
   7  19   1    1.88    0.95 
   9 -19   1    5.50    1.28 
   9  19   1    7.65    1.38 
  11  19   1   -0.27    0.74 
  11 -19   1    0.14    0.87 
  13 -19   1   94.04    4.07 
  13  19   1  100.41    3.90 
  15  19   1    5.65    1.25 
  15 -19   1    7.37    1.46 
  17 -19   1    0.66    1.02 
  17  19   1    2.35    1.04 
  19 -19   1   -1.14    0.80 
  19  19   1   -1.10    0.69 
  21 -19   1    4.49    1.39 
  21  19   1    5.83    1.40 
  23  19   1    0.17    0.98 
  23 -19   1    0.45    1.04 
  25  19   1   74.93    3.70 
  25 -19   1   80.35    4.16 
  27  19   1    2.33    1.12 
  29  19   1    0.21    0.94 
  22 -20  -1    3.85    1.28 
  20  20  -1   37.25    3.11 
  20 -20  -1   40.82    3.02 
  18 -20  -1    9.87    1.63 
  18  20  -1   10.28    1.61 
  16  20  -1    7.32    1.40 
  16 -20  -1   10.51    1.83 
  14 -20  -1    2.26    1.15 
  14  20  -1    5.41    1.25 
  12 -20  -1    4.31    1.27 
  12  20  -1    3.47    1.10 
  10  20  -1    6.97    1.32 
  10 -20  -1    5.02    1.30 
   8  20  -1   52.26    2.83 
   8 -20  -1   50.96    2.97 
   6 -20  -1   12.61    1.75 
  -4 -20   1   26.50    3.10 
   4 -20  -1   28.75    2.28 
  -2 -20   1   32.47    2.36 
   2 -20  -1   32.45    2.35 
   0 -20   1    3.58    1.15 
   0 -20  -1    3.35    1.11 
  -2 -20  -1    6.99    1.32 
   2 -20   1    7.00    1.46 
   4 -20   1   26.90    2.33 
   6 -20   1   17.49    2.06 
   6  20   1   18.17    1.93 
   8  20   1   16.87    1.88 
   8 -20   1   14.88    1.89 
  10  20   1   29.22    2.30 
  10 -20   1   33.98    2.62 
  12 -20   1   10.59    1.76 
  12  20   1    8.57    1.41 
  14 -20   1    0.02    0.95 
  14  20   1    0.03    0.82 
  16  20   1   14.13    1.84 
  16 -20   1   17.02    2.27 
  18  20   1    8.32    1.58 
  18 -20   1   12.46    2.03 
  20 -20   1    9.55    1.66 
  20  20   1   11.16    1.77 
  22 -20   1   20.09    2.59 
  22  20   1   20.36    2.26 
  24  20   1    5.83    1.37 
  26  20   1   14.81    2.02 
  19 -21  -1   -1.24    0.82 
  17 -21  -1   10.64    1.89 
  15  21  -1    2.44    1.20 
  15 -21  -1    3.44    1.38 
  13 -21  -1    4.83    1.34 
  13  21  -1    5.25    1.31 
  11 -21  -1   -0.03    0.92 
  11  21  -1   -0.27    0.76 
   9  21  -1    0.18    0.77 
   9 -21  -1    1.05    0.96 
   7 -21  -1    7.02    1.51 
   5 -21  -1   20.19    2.24 
   3 -21  -1    0.15    0.88 
   1 -21  -1    6.61    1.44 
  -1 -21   1    7.33    1.47 
   1 -21   1    3.27    1.20 
  -1 -21  -1    2.66    1.04 
   3 -21   1   -0.38    0.84 
   5 -21   1   17.47    2.06 
   7 -21   1   15.72    2.00 
   7  21   1   13.59    1.89 
   9  21   1    1.70    1.02 
   9 -21   1    0.74    1.04 
  11  21   1    5.63    1.34 
  11 -21   1    3.40    1.26 
  13 -21   1    0.70    0.94 
  13  21   1   -1.36    0.75 
  15  21   1    0.16    0.86 
  15 -21   1   -1.33    0.70 
  17  21   1    2.01    1.05 
  17 -21   1    0.40    1.17 
  19  21   1    7.54    1.53 
  21  21   1   -0.33    0.93 
  23  21   1    6.09    1.48 
  14 -22  -1    0.67    1.00 
  12 -22  -1   11.34    1.81 
  10 -22  -1    1.85    1.15 
   8 -22  -1   21.32    2.37 
   6 -22  -1    4.34    1.37 
   4 -22  -1    0.55    0.98 
   2 -22  -1    3.07    1.18 
   0 -22   1    7.63    1.55 
   2 -22   1    0.99    0.98 
   4 -22   1   20.43    2.32 
   6 -22   1   13.04    1.93 
   8  22   1    0.21    0.84 
   8 -22   1    0.01    0.85 
  10 -22   1   -0.16    0.85 
  10  22   1    1.34    0.96 
  12  22   1    2.16    1.06 
  12 -22   1   -0.99    0.78 
  14  22   1    6.75    1.42 
  14 -22   1    8.87    1.70 
  16  22   1    5.01    1.37 
  18  22   1    0.76    1.02 
  20  22   1    1.04    1.25 
   9 -23  -1    2.47    1.23 
   7 -23  -1    5.23    1.31 
   5 -23  -1    0.48    0.84 
   3 -23  -1    2.81    1.16 
   1 -23   1   78.10    3.86 
   3 -23   1    3.99    1.27 
   5 -23   1    9.65    1.70 
   7 -23   1    0.57    0.92 
   9 -23   1    6.73    1.50 
  11  23   1    3.29    1.29 
  13  23   1   63.27    3.56 
   4 -24  -1    7.79    1.57 
  46   0  -2    8.56    1.71 
  44   0  -2   18.69    2.30 
  42   0  -2   28.84    2.45 
  40   0  -2   27.38    2.24 
  38   0  -2    0.86    0.86 
  36   0  -2   22.75    1.92 
  34   0  -2   90.87    3.43 
  32   0  -2   28.68    1.94 
  30   0  -2   88.04    3.17 
  28   0  -2   33.13    1.25 
  28   0  -2   32.04    1.78 
  26   0  -2    5.11    0.60 
  26   0  -2    4.02    0.76 
  24   0  -2   13.33    0.82 
  24   0  -2   14.94    1.23 
  22   0  -2  420.50    7.19 
  22   0  -2  411.13    6.07 
  20   0  -2   22.56    1.26 
  20   0  -2   22.65    0.91 
  18   0  -2  126.86    2.95 
  18   0  -2  128.23    2.37 
  16   0  -2   35.58    1.35 
  16   0  -2   34.98    1.03 
  14   0  -2   11.51    0.71 
 -14   0   2   11.23    0.56 
 -12   0   2   21.43    0.72 
  12   0  -2   20.85    0.89 
 -10   0   2 2654.71   34.14 
  -8   0   2    1.88    0.25 
  -6   0   2    3.50    0.30 
  -4   0   2   99.32    1.62 
   2   0  -2   14.35    0.38 
  -2   0   2   13.99    0.32 
  -2   0   2   13.96    0.45 
   0   0   2   19.88    0.55 
   0   0   2   21.32    0.48 
   2   0   2 2439.24   31.38 
   2   0   2 2365.90   31.05 
   4   0   2  126.50    1.99 
   4   0   2  128.69    2.15 
   6   0   2   81.63    1.47 
   6   0   2   79.91    1.68 
   8   0   2  152.89    2.40 
   8   0   2  147.45    2.74 
  10   0   2    9.71    0.69 
  10   0   2    7.39    0.50 
  12   0   2    0.13    0.26 
  12   0   2   -0.08    0.19 
  14   0   2 2516.77   31.95 
  14   0   2 2449.61   30.95 
  16   0   2    7.88    0.57 
  16   0   2    8.37    0.90 
  18   0   2   47.65    1.31 
  18   0   2   46.60    1.84 
  20   0   2  116.84    3.16 
  20   0   2  119.13    2.35 
  22   0   2    0.31    0.42 
  22   0   2    0.44    0.30 
  24   0   2   18.77    0.94 
  24   0   2   15.41    1.32 
  26   0   2 1008.40   15.27 
  26   0   2  968.05   13.51 
  28   0   2    0.60    0.63 
  30   0   2   24.43    1.90 
  32   0   2   72.74    3.12 
  34   0   2    9.40    1.43 
  36   0   2    2.60    1.07 
  38   0   2  257.96    6.91 
  40   0   2    1.52    0.95 
  42   0   2   23.43    2.52 
  44   0   2   27.69    2.85 
  47   1  -2    8.31    1.69 
  47  -1  -2    7.64    1.63 
  45   1  -2    1.45    1.01 
  45  -1  -2    0.33    0.86 
  43  -1  -2  130.19    4.90 
  43   1  -2  125.19    4.78 
  41  -1  -2    1.85    0.99 
  41   1  -2    1.18    0.93 
  39  -1  -2   10.74    1.55 
  39   1  -2   10.81    1.54 
  37  -1  -2   47.57    2.71 
  37   1  -2   54.92    2.87 
  35  -1  -2   15.17    1.74 
  35   1  -2   13.94    1.70 
  33  -1  -2    3.20    0.86 
  33   1  -2    4.49    0.93 
  31   1  -2  513.24    9.40 
  31  -1  -2  517.84    9.47 
  29   1  -2    3.00    0.75 
  29  -1  -2    3.26    0.60 
  29  -1  -2    2.51    0.70 
  27   1  -2   15.85    1.31 
  27  -1  -2   14.84    1.25 
  27  -1  -2   12.91    0.92 
  25   1  -2  105.66    3.10 
  25  -1  -2  104.87    2.43 
  25  -1  -2  101.32    3.08 
  25   1  -2  104.54    2.15 
  23   1  -2   51.77    2.02 
  23   1  -2   48.72    1.32 
  23  -1  -2   49.03    1.52 
  23  -1  -2   51.09    1.99 
  21   1  -2    6.99    0.85 
  21  -1  -2    7.75    0.65 
  21  -1  -2    6.25    0.82 
  21   1  -2    6.35    0.52 
  19   1  -2 1375.57   17.34 
  19   1  -2 1379.30   18.72 
  19  -1  -2 1355.52   17.69 
  19  -1  -2 1419.83   18.86 
  17   1  -2    5.74    0.45 
  17   1  -2    4.27    0.56 
  17  -1  -2    6.36    0.55 
  17  -1  -2    5.69    0.70 
  15  -1  -2   23.94    0.90 
 -15  -1   2   23.27    0.74 
  15   1  -2   23.33    1.04 
 -13  -1   2  283.59    3.98 
  13   1  -2  282.12    4.57 
  11   1  -2    3.16    0.40 
 -11   1   2    3.13    0.37 
 -11  -1   2    2.93    0.28 
  -9  -1   2   12.32    0.47 
   9   1  -2   11.35    0.55 
  -9   1   2   11.18    0.55 
  -7   1   2 3899.05   49.42 
   7   1  -2 3789.61   49.86 
  -7  -1   2 3750.18   48.29 
  -5  -1   2    2.11    0.22 
   5   1  -2    2.73    0.28 
   5   1  -2    2.04    0.19 
  -5   1   2    2.36    0.27 
   3   1  -2    0.60    0.07 
   3   1  -2    0.59    0.14 
  -3  -1   2    0.72    0.15 
  -3   1   2    0.69    0.16 
  -1  -1   2  232.95    3.27 
  -1   1   2  237.22    3.25 
   1  -1  -2  235.09    2.88 
   1   1  -2  232.92    3.15 
  -1   1   2  227.05    3.21 
   1  -1   2    6.06    0.34 
   1   1   2    5.83    0.29 
   1   1   2    6.14    0.33 
   1  -1   2    5.75    0.25 
   3   1   2    2.42    0.21 
   3  -1   2    2.17    0.23 
   3   1   2    2.77    0.30 
   3  -1   2    2.61    0.28 
   5   1   2 2593.09   33.03 
   5  -1   2 2590.01   33.55 
   5  -1   2 2644.30   34.76 
   5   1   2 2569.19   35.01 
   7   1   2   31.50    1.04 
   7   1   2   30.74    0.73 
   7  -1   2   29.66    0.89 
   7  -1   2   30.89    0.99 
   9  -1   2    3.50    0.44 
   9   1   2    5.03    0.55 
   9   1   2    4.34    0.33 
   9  -1   2    4.04    0.43 
  11  -1   2  293.41    4.33 
  11   1   2  283.60    4.79 
  11   1   2  287.34    3.99 
  11  -1   2  282.09    4.75 
  13   1   2   26.51    1.21 
  13  -1   2   26.18    0.95 
  13   1   2   26.59    0.78 
  13  -1   2   24.79    1.15 
  15   1   2    2.38    0.31 
  15  -1   2    2.80    0.54 
  15   1   2    2.83    0.55 
  15  -1   2    1.59    0.35 
  17   1   2  814.54   10.57 
  17  -1   2  823.27   10.99 
  17   1   2  834.46   12.10 
  17  -1   2  806.77   11.98 
  19   1   2   18.05    0.75 
  19   1   2   17.25    1.21 
  19  -1   2   15.71    0.87 
  19  -1   2   16.81    1.21 
  21   1   2    5.56    0.86 
  21  -1   2    4.64    0.78 
  21   1   2    5.83    0.52 
  21  -1   2    6.56    0.67 
  23  -1   2    0.98    0.48 
  23   1   2   -0.31    0.41 
  23  -1   2    0.64    0.37 
  23   1   2    0.29    0.26 
  25  -1   2   34.93    1.36 
  25   1   2   33.28    1.91 
  25  -1   2   34.51    1.92 
  27   1   2   13.16    1.40 
  27  -1   2   14.74    0.97 
  27  -1   2   15.98    1.42 
  29  -1   2  201.74    5.17 
  29   1   2  192.77    5.12 
  31  -1   2   12.88    1.60 
  31   1   2   13.44    1.66 
  33  -1   2    0.18    0.55 
  33   1   2    0.65    0.68 
  35   1   2    2.22    0.85 
  35  -1   2    2.42    0.94 
  37   1   2   29.54    2.38 
  37  -1   2   28.84    2.35 
  39   1   2    5.62    1.34 
  39  -1   2    5.63    1.31 
  41  -1   2   36.72    2.75 
  41   1   2   32.53    2.64 
  43  -1   2    4.94    1.44 
  43   1   2    8.91    1.70 
  45   1   2   -1.73    0.80 
  45  -1   2    1.73    1.16 
  46  -2  -2   -1.44    0.71 
  46   2  -2    0.71    0.91 
  44   2  -2    2.45    1.17 
  44  -2  -2    3.48    1.27 
  42   2  -2    2.88    1.05 
  42  -2  -2    3.23    1.09 
  40   2  -2   -0.01    0.76 
  40  -2  -2    1.15    0.81 
  38   2  -2    7.86    1.34 
  38  -2  -2    9.67    1.58 
  36  -2  -2    5.46    1.13 
  36   2  -2    6.40    1.29 
  34  -2  -2    3.16    0.93 
  34   2  -2    4.49    1.03 
  32  -2  -2    0.34    0.67 
  32   2  -2    0.75    0.68 
  30   2  -2    3.07    0.87 
  30  -2  -2    3.77    0.67 
  30  -2  -2    3.91    0.91 
  28  -2  -2   15.58    1.37 
  28   2  -2   12.07    1.31 
  28  -2  -2   13.82    0.99 
  26   2  -2    4.06    0.83 
  26  -2  -2    2.06    0.64 
  26  -2  -2    3.83    0.65 
  24  -2  -2    0.43    0.45 
  24   2  -2    0.28    0.27 
  24  -2  -2   -0.05    0.39 
  24   2  -2    1.20    0.53 
  22  -2  -2    1.19    0.38 
  22  -2  -2    1.69    0.53 
  22   2  -2    0.46    0.24 
  22   2  -2    0.62    0.43 
  20   2  -2    7.58    0.48 
  20   2  -2    6.90    0.80 
  20  -2  -2    9.07    0.74 
  18   2  -2   14.16    0.96 
  18   2  -2   14.22    0.57 
  18  -2  -2   13.40    0.82 
  16   2  -2    0.27    0.28 
  16  -2  -2    1.04    0.31 
 -16  -2   2    0.96    0.21 
  14  -2  -2   -0.13    0.22 
  14   2  -2    0.20    0.24 
 -14  -2   2   -0.06    0.14 
  12  -2  -2   18.92    0.82 
  12   2  -2   19.32    0.85 
 -12  -2   2   19.24    0.58 
  10   2  -2    2.16    0.34 
 -10   2   2    1.97    0.34 
 -10  -2   2    2.93    0.26 
   8   2  -2   32.31    0.89 
  -8  -2   2   31.23    0.74 
  -8   2   2   32.61    0.96 
  -6  -2   2   10.09    0.43 
  -6   2   2   10.69    0.55 
   6   2  -2   10.77    0.45 
  -4  -2   2    1.50    0.22 
   4   2  -2    1.30    0.16 
  -4   2   2    1.82    0.26 
   4   2  -2    1.42    0.23 
  -2  -2   2    8.70    0.42 
  -2   2   2    7.98    0.41 
   2   2  -2    8.49    0.41 
   2   2  -2    8.49    0.24 
  -2   2   2    8.26    0.41 
   0  -2   2   26.41    0.77 
   0   2   2   25.52    0.72 
   0   2   2   26.74    0.69 
   0   2  -2   25.89    0.74 
   2   2   2  532.15    7.25 
   2   2   2  546.18    6.91 
   4   2   2    0.26    0.15 
   4  -2   2    0.25    0.22 
   4   2   2    0.37    0.24 
   6  -2   2    0.51    0.25 
   6   2   2    0.42    0.14 
   6   2   2    0.38    0.25 
   8  -2   2   25.21    0.92 
   8   2   2   25.46    0.62 
   8   2   2   26.15    1.03 
  10   2   2   34.19    1.26 
  10   2   2   33.22    0.73 
  10  -2   2   34.91    1.22 
  10  -2   2   33.43    1.09 
  12   2   2    0.32    0.15 
  12   2   2    0.78    0.34 
  12  -2   2    0.62    0.29 
  12  -2   2    0.36    0.27 
  14   2   2   19.51    0.59 
  14  -2   2   21.97    0.96 
  14  -2   2   20.87    1.11 
  14   2   2   21.92    1.17 
  16  -2   2   13.80    0.99 
  16   2   2   13.18    0.51 
  16   2   2   14.68    1.04 
  16  -2   2   13.07    0.81 
  18   2   2    0.03    0.38 
  18   2   2   -0.45    0.17 
  18  -2   2   -0.37    0.29 
  18  -2   2   -0.29    0.30 
  20   2   2    2.29    0.57 
  20   2   2    2.04    0.29 
  20  -2   2    1.46    0.43 
  20  -2   2    1.70    0.57 
  22  -2   2    1.38    0.54 
  22   2   2    1.23    0.50 
  22  -2   2    1.30    0.45 
  22   2   2    1.24    0.27 
  24  -2   2   12.84    1.31 
  24   2   2   10.72    1.26 
  24  -2   2   10.27    0.90 
  26   2   2   36.38    2.02 
  26  -2   2   36.17    1.49 
  26  -2   2   35.34    1.98 
  28  -2   2    2.02    0.56 
  28  -2   2    2.28    0.77 
  28   2   2    1.78    0.72 
  30  -2   2    0.16    0.65 
  30   2   2    0.05    0.65 
  32  -2   2   19.05    1.92 
  32   2   2   22.48    1.81 
  34   2   2    2.67    0.99 
  34  -2   2    1.82    0.81 
  36  -2   2    0.20    0.71 
  36   2   2   -0.79    0.62 
  38  -2   2   10.29    1.72 
  38   2   2    8.72    1.50 
  40  -2   2    0.54    0.87 
  40   2   2   -0.12    0.68 
  42  -2   2    0.94    1.04 
  42   2   2    2.60    1.15 
  44   2   2    7.17    1.60 
  44  -2   2    6.39    1.57 
  47   3  -2    0.95    0.96 
  45  -3  -2    2.13    1.18 
  45   3  -2    2.60    1.16 
  43  -3  -2   25.11    2.52 
  43   3  -2   19.63    2.19 
  41  -3  -2    1.32    0.81 
  41   3  -2    1.57    0.90 
  39  -3  -2    5.71    1.32 
  39   3  -2    6.38    1.32 
  37  -3  -2   -0.12    0.68 
  37   3  -2    1.72    0.90 
  35   3  -2   14.61    1.65 
  35  -3  -2   17.74    1.91 
  33   3  -2    0.16    0.52 
  33  -3  -2    0.71    0.67 
  31  -3  -2   84.19    3.19 
  31  -3  -2   87.35    2.56 
  31   3  -2   85.79    3.17 
  29  -3  -2    0.91    0.48 
  29   3  -2   -0.25    0.41 
  29  -3  -2    0.80    0.63 
  27  -3  -2   11.03    1.24 
  27  -3  -2   12.43    0.99 
  27   3  -2   13.90    1.36 
  25  -3  -2    0.01    0.42 
  25  -3  -2    0.43    0.49 
  25   3  -2   -0.01    0.49 
  23   3  -2   40.40    0.94 
  23   3  -2   39.43    1.79 
  23  -3  -2   42.20    1.57 
  21   3  -2    0.49    0.19 
  21   3  -2    0.88    0.44 
  21  -3  -2    0.15    0.36 
  19   3  -2  234.19    4.55 
  19  -3  -2  237.69    4.23 
  19   3  -2  236.16    3.31 
  17  -3  -2    9.41    0.74 
 -17  -3   2    9.69    0.41 
  17   3  -2    7.68    0.78 
  15  -3  -2   53.09    1.56 
  15   3  -2   53.60    1.64 
 -15  -3   2   55.50    1.05 
  13  -3  -2    4.60    0.55 
 -13  -3   2    3.55    0.30 
  13   3  -2    5.15    0.56 
  11   3  -2   23.88    0.92 
  11  -3  -2   22.43    0.94 
 -11  -3   2   23.65    0.63 
   9   3  -2   -0.12    0.17 
   9   3  -2   -0.03    0.21 
   9  -3  -2   -0.12    0.22 
  -9  -3   2    0.00    0.13 
   7   3  -2 2482.03   33.11 
  -7   3   2 2454.30   31.33 
  -7  -3   2 2430.48   31.93 
   7   3  -2 2503.36   29.66 
   5   3  -2    0.47    0.16 
  -5  -3   2    0.23    0.17 
   5   3  -2    0.26    0.20 
  -5   3   2    0.20    0.21 
   3   3  -2    5.67    0.43 
  -3  -3   2    4.15    0.39 
   3   3  -2    4.74    0.29 
  -3   3   2    4.65    0.40 
  -3   3   2    4.73    0.40 
  -1  -3   2    1.65    0.35 
  -1   3   2    1.33    0.31 
   1   3  -2    2.27    0.37 
  -1   3   2    1.26    0.32 
   1  -3  -2    1.53    0.16 
   1   3   2    1.86    0.31 
   1  -3   2    1.60    0.33 
   1   3   2    1.86    0.26 
   3   3   2   76.76    1.36 
   3   3   2   70.91    1.62 
   5  -3   2  195.36    3.28 
   5   3   2  199.85    3.40 
   5   3   2  199.44    2.82 
   7  -3   2    0.21    0.25 
   7   3   2    0.31    0.24 
   7   3   2    0.50    0.14 
   9   3   2    3.76    0.25 
   9   3   2    3.15    0.51 
   9  -3   2    2.88    0.45 
  11  -3   2   57.63    1.58 
  11   3   2   55.89    0.97 
  13  -3   2    7.84    0.73 
  13   3   2    6.45    0.74 
  13   3   2    6.07    0.28 
  15   3   2    7.45    0.82 
  15  -3   2    7.63    0.81 
  15   3   2    7.52    0.30 
  15  -3   2    7.04    0.70 
  17  -3   2  216.09    4.47 
  17  -3   2  215.50    3.98 
  17   3   2  227.18    4.59 
  19   3   2   -0.11    0.41 
  19  -3   2    0.23    0.40 
  19  -3   2   -0.06    0.36 
  21  -3   2   -0.21    0.32 
  21  -3   2    0.51    0.44 
  21   3   2    0.27    0.48 
  23  -3   2    5.15    0.72 
  23   3   2    5.58    0.90 
  23  -3   2    6.42    0.97 
  25  -3   2    0.40    0.44 
  25  -3   2    0.83    0.55 
  25   3   2    0.21    0.54 
  27   3   2   15.82    1.65 
  27  -3   2   16.16    1.61 
  27  -3   2   15.47    1.15 
  29  -3   2   49.44    1.91 
  29   3   2   53.46    2.60 
  29  -3   2   50.43    2.45 
  31   3   2    1.64    0.83 
  31  -3   2    3.48    0.98 
  33   3   2    0.69    0.70 
  33  -3   2   -0.68    0.62 
  35   3   2    1.24    0.89 
  35  -3   2    1.27    0.81 
  37  -3   2    4.65    1.13 
  37   3   2    4.87    1.21 
  39   3   2    6.69    1.37 
  39  -3   2    4.98    1.26 
  41  -3   2   19.47    2.31 
  41   3   2   18.99    2.26 
  43   3   2   -0.02    0.92 
  43  -3   2   -0.23    0.90 
  45   3   2   -1.39    1.23 
  46   4  -2    4.90    1.36 
  46  -4  -2    4.06    1.26 
  44  -4  -2   19.63    2.35 
  44   4  -2   20.14    2.27 
  42   4  -2   10.43    1.68 
  42  -4  -2   11.45    1.79 
  40   4  -2   36.52    2.50 
  40  -4  -2   36.19    2.54 
  38   4  -2    2.80    1.02 
  38  -4  -2    0.87    0.89 
  36  -4  -2    3.25    1.00 
  36   4  -2    1.99    0.87 
  34  -4  -2   74.15    3.17 
  34   4  -2   66.35    2.96 
  32  -4  -2   35.51    1.76 
  32  -4  -2   33.69    2.16 
  32   4  -2   33.55    2.12 
  30  -4  -2   21.59    1.44 
  30  -4  -2   24.37    1.80 
  30   4  -2   22.20    1.69 
  28  -4  -2   75.73    2.38 
  28   4  -2   75.73    2.78 
  28  -4  -2   72.68    2.83 
  26  -4  -2   -0.10    0.40 
  26   4  -2    0.31    0.43 
  24   4  -2   -0.60    0.36 
  24  -4  -2   -0.04    0.45 
  22  -4  -2  244.61    4.60 
  22   4  -2  245.02    4.94 
  20  -4  -2   73.14    2.12 
  20   4  -2   72.30    2.26 
  18   4  -2   17.13    1.06 
 -18  -4   2   18.59    0.49 
  18  -4  -2   18.11    1.05 
  16   4  -2    3.59    0.55 
  16  -4  -2    2.98    0.50 
 -16  -4   2    3.95    0.26 
 -14  -4   2   22.45    0.60 
  14   4  -2   22.83    1.04 
  14  -4  -2   22.84    1.08 
  12  -4  -2   11.66    0.77 
  12   4  -2   11.16    0.71 
 -12  -4   2   10.18    0.43 
  10  -4  -2 1806.42   22.89 
 -10  -4   2 1778.98   23.19 
  10   4  -2 1840.62   22.32 
  10   4  -2 1801.83   22.99 
   8   4  -2    0.39    0.26 
   8  -4  -2    0.12    0.26 
  -8  -4   2    0.42    0.21 
   8   4  -2   -0.09    0.23 
   6  -4  -2    2.05    0.36 
   6   4  -2    1.12    0.30 
   6   4  -2    1.77    0.29 
  -6  -4   2    1.82    0.28 
   4   4  -2  582.04    7.66 
   4   4  -2  573.72    7.62 
  -4  -4   2  576.94    7.74 
  -4   4   2  581.96    8.02 
   2   4  -2   21.07    0.65 
  -2  -4   2   20.99    0.81 
  -2   4   2   21.16    0.79 
  -2   4   2   22.38    0.85 
   0   4   2    1.72    0.32 
   0   4   2    2.23    0.20 
   0   4  -2    2.01    0.34 
   0  -4   2    1.43    0.32 
   0   4   2    1.58    0.27 
   2   4   2  304.95    3.96 
   2   4   2  302.92    4.70 
   2   4   2  302.90    4.32 
   2  -4   2  309.55    4.67 
   4   4   2   11.79    0.72 
   4   4   2   12.06    0.51 
   4  -4   2   11.67    0.72 
   6   4   2   27.24    1.07 
   6   4   2   25.76    0.71 
   6  -4   2   26.05    1.05 
   8   4   2    0.09    0.29 
   8   4   2    0.09    0.14 
   8  -4   2    0.16    0.31 
  10  -4   2    2.19    0.44 
  10   4   2    2.55    0.50 
  10   4   2    2.44    0.23 
  12   4   2    6.84    0.78 
  12  -4   2    5.20    0.62 
  12   4   2    6.46    0.27 
  14  -4   2 1899.81   24.13 
  14   4   2 1863.35   24.87 
  16  -4   2    4.64    0.66 
  16   4   2    3.68    0.68 
  18  -4   2   48.99    1.73 
  18   4   2   52.95    2.04 
  18  -4   2   51.51    1.96 
  20  -4   2    3.87    0.66 
  20   4   2    3.23    0.69 
  20  -4   2    4.47    0.80 
  22  -4   2    1.96    0.58 
  22   4   2    3.96    0.81 
  22  -4   2    2.51    0.59 
  24  -4   2    4.27    0.87 
  24  -4   2    2.73    0.62 
  24   4   2    3.11    0.72 
  26   4   2  461.58    8.66 
  26  -4   2  467.06    8.67 
  26  -4   2  462.09    7.63 
  28  -4   2   -0.27    0.42 
  28   4   2   -0.76    0.54 
  28  -4   2    0.43    0.54 
  30   4   2   33.24    2.14 
  30  -4   2   35.82    1.78 
  30  -4   2   36.24    2.16 
  32  -4   2   18.42    1.97 
  32   4   2   16.91    1.82 
  34  -4   2   -0.16    0.54 
  34   4   2   -0.30    0.71 
  36   4   2    1.08    0.91 
  36  -4   2    1.05    0.86 
  38   4   2  133.68    4.78 
  38  -4   2  127.49    4.68 
  40  -4   2    0.97    0.83 
  40   4   2    1.38    1.00 
  42  -4   2   17.75    2.29 
  42   4   2   15.39    2.08 
  44  -4   2    0.60    1.01 
  44   4   2    1.82    1.19 
  47   5  -2    4.48    1.38 
  45   5  -2    1.11    0.85 
  45  -5  -2    2.32    1.12 
  43   5  -2  132.10    4.92 
  43  -5  -2  132.11    4.98 
  41  -5  -2    0.34    0.74 
  41   5  -2    0.17    0.80 
  39   5  -2   17.22    1.92 
  39  -5  -2   21.90    2.25 
  37   5  -2   21.51    1.93 
  37  -5  -2   19.80    2.16 
  35  -5  -2   10.90    1.48 
  35   5  -2   10.65    1.49 
  33   5  -2    5.58    1.06 
  33  -5  -2    5.99    1.15 
  33  -5  -2    6.50    0.99 
  31   5  -2  645.75   11.09 
  31  -5  -2  636.92   10.16 
  31  -5  -2  634.23   11.30 
  29  -5  -2   31.04    1.94 
  29   5  -2   28.95    1.81 
  29  -5  -2   31.05    1.69 
  27   5  -2    7.22    1.01 
  27  -5  -2    8.21    0.98 
  25  -5  -2  135.91    3.40 
  25   5  -2  137.65    3.65 
  23   5  -2   28.37    1.55 
  23  -5  -2   26.94    1.44 
  21   5  -2    0.87    0.39 
  21  -5  -2    1.78    0.53 
  19  -5  -2 1077.74   14.79 
  19   5  -2 1064.67   15.06 
 -17  -5   2    7.85    0.32 
  17  -5  -2    8.94    0.88 
  17   5  -2    9.15    0.89 
 -15  -5   2    0.57    0.16 
  15  -5  -2   -0.01    0.29 
  15   5  -2    0.48    0.32 
  13   5  -2  187.73    3.53 
 -13  -5   2  184.10    2.76 
  13  -5  -2  181.65    3.59 
  13   5  -2  190.85    3.53 
 -11  -5   2  100.42    1.80 
  11   5  -2  100.56    2.28 
  11  -5  -2  102.52    2.39 
  11   5  -2  104.23    2.25 
  -9  -5   2   21.86    0.75 
   9   5  -2   21.00    0.90 
   9   5  -2   20.63    0.91 
   9  -5  -2   22.09    1.02 
  -7  -5   2 4597.39   58.76 
   7   5  -2 4704.88   60.05 
   7  -5  -2 4541.45   59.87 
   7   5  -2 4680.64   60.46 
   5   5  -2    8.43    0.53 
  -5  -5   2    8.35    0.57 
   5   5  -2    8.11    0.60 
   5  -5  -2    8.55    0.66 
  -3   5   2   21.39    0.91 
  -3  -5   2   21.17    0.88 
   3  -5  -2   21.33    0.90 
   3   5  -2   21.67    0.75 
   3   5  -2   22.14    0.87 
   1   5  -2 1358.55   17.07 
  -1   5   2 1305.31   17.44 
  -1   5   2 1335.17   16.49 
   1  -5  -2 1352.63   17.08 
   1   5  -2 1359.21   16.72 
  -1  -5   2 1350.26   17.19 
   1  -5   2   77.14    1.85 
   1   5   2   78.65    1.86 
   1   5   2   79.48    1.34 
  -1  -5  -2   76.37    1.65 
   3  -5   2    8.96    0.66 
   3   5   2    9.63    0.68 
   3   5   2    9.21    0.44 
   5  -5   2 1286.48   17.07 
   5   5   2 1343.56   17.40 
   7  -5   2    9.14    0.71 
   7   5   2   10.39    0.77 
   9  -5   2    4.39    0.56 
   9   5   2    5.67    0.66 
  -9  -5  -2    5.48    0.35 
 -11  -5  -2    3.05    0.26 
  11   5   2    2.02    0.50 
  11  -5   2    3.10    0.55 
  13  -5   2   73.74    2.10 
  13   5   2   73.62    2.25 
  15   5   2    9.02    0.94 
  15  -5   2   12.28    0.95 
  17  -5   2 1160.87   15.84 
  17   5   2 1158.21   16.51 
  19   5   2    8.18    0.98 
  19  -5   2    8.98    0.97 
  21  -5   2    0.32    0.41 
  21  -5   2    0.20    0.40 
  21   5   2    0.17    0.52 
  23  -5   2   21.85    1.34 
  23  -5   2   24.13    1.60 
  23   5   2   24.01    1.57 
  25  -5   2   62.34    2.23 
  25   5   2   64.42    2.64 
  25  -5   2   60.11    2.57 
  27  -5   2   10.48    1.36 
  27  -5   2   10.01    1.13 
  27   5   2    9.09    1.30 
  29  -5   2  310.40    6.86 
  29   5   2  293.71    6.75 
  29  -5   2  301.23    5.89 
  31  -5   2   22.84    1.55 
  31   5   2   22.88    1.89 
  31  -5   2   20.06    2.01 
  33   5   2    0.44    0.68 
  33  -5   2   -0.40    0.60 
  35  -5   2    2.14    0.87 
  35   5   2    0.98    0.87 
  37  -5   2   21.80    2.29 
  37   5   2   21.52    2.29 
  39   5   2    8.52    1.66 
  39  -5   2   12.05    1.82 
  41  -5   2   38.55    2.75 
  41   5   2   39.94    2.92 
  43  -5   2    5.52    1.43 
  43   5   2    5.53    1.49 
  46   6  -2    1.00    1.05 
  44   6  -2    1.59    1.05 
  44  -6  -2    1.09    1.01 
  42   6  -2    6.07    1.42 
  42  -6  -2   10.26    1.70 
  40  -6  -2   15.47    1.96 
  40   6  -2   12.40    1.76 
  38   6  -2    0.94    0.85 
  38  -6  -2   -0.55    0.77 
  36   6  -2   11.07    1.58 
  36  -6  -2    8.43    1.44 
  34  -6  -2    2.40    0.85 
  34  -6  -2    1.94    0.75 
  34   6  -2    1.32    0.77 
  32  -6  -2    1.93    0.70 
  32  -6  -2    0.72    0.65 
  32   6  -2    0.65    0.64 
  30   6  -2   22.00    1.76 
  30  -6  -2   26.03    1.68 
  28  -6  -2    2.76    0.73 
  28   6  -2    3.25    0.77 
  26   6  -2    0.57    0.53 
  26  -6  -2    0.57    0.52 
  24   6  -2   27.02    1.58 
  24  -6  -2   27.20    1.55 
  22  -6  -2   30.15    1.57 
  22   6  -2   30.16    1.58 
  20  -6  -2    1.05    0.47 
  20   6  -2    1.08    0.51 
  18   6  -2   33.90    1.53 
  18  -6  -2   37.42    1.61 
 -16  -6   2   34.03    0.79 
  16   6  -2   35.00    1.44 
  16   6  -2   34.97    1.47 
  16  -6  -2   33.62    1.48 
  14  -6  -2    5.38    0.72 
 -14  -6   2    6.02    0.40 
  14   6  -2    5.97    0.67 
  14   6  -2    6.91    0.77 
  12   6  -2   54.41    1.67 
  12  -6  -2   54.11    1.80 
 -12  -6   2   55.38    1.26 
  12   6  -2   56.37    1.67 
  10   6  -2  532.11    7.89 
 -10  -6   2  547.33    7.44 
  10   6  -2  553.03    7.85 
  10  -6  -2  558.31    8.19 
   8  -6  -2   23.36    1.10 
   8   6  -2   23.12    1.01 
  -8  -6   2   23.47    0.89 
   8   6  -2   23.17    0.96 
   6   6  -2   37.40    1.23 
   6  -6  -2   36.64    1.30 
   6   6  -2   36.34    1.14 
  -6  -6   2   38.67    1.19 
  -4   6   2   77.90    1.97 
   4   6  -2   78.76    1.73 
  -4  -6   2   81.30    1.88 
   4   6  -2   80.37    1.86 
   4  -6  -2   78.41    1.95 
   2   6  -2   10.87    0.69 
  -2  -6   2   11.14    0.73 
  -2   6   2   10.66    0.74 
   2  -6  -2   11.57    0.73 
   2   6  -2   11.38    0.61 
   0   6  -2   19.14    0.90 
   0  -6   2   19.19    0.94 
   0  -6  -2   18.95    0.86 
   0   6   2   19.16    0.63 
   0   6   2   18.94    0.94 
   2   6   2  662.34    9.42 
   2   6   2  653.85    8.34 
   2  -6   2  659.64    9.30 
  -2  -6  -2  665.60    8.95 
   4   6   2    3.46    0.37 
   4   6   2    2.55    0.45 
   4  -6   2    2.76    0.52 
  -4  -6  -2    2.06    0.35 
   6   6   2    4.74    0.45 
   6  -6   2    4.28    0.62 
   6   6   2    4.55    0.59 
  -6  -6  -2    4.58    0.42 
  -8  -6  -2   57.22    1.28 
   8  -6   2   59.59    1.83 
   8   6   2   55.93    1.80 
  10  -6   2   13.21    0.93 
 -10  -6  -2   14.15    0.57 
  10   6   2   13.96    0.96 
  12  -6   2   -0.06    0.36 
 -12  -6  -2    0.07    0.16 
  12   6   2   -0.11    0.35 
  14  -6   2  908.05   12.93 
  14   6   2  924.65   13.39 
  16  -6   2    1.03    0.49 
  16   6   2    0.18    0.52 
  18  -6   2    5.12    0.80 
  18   6   2    3.82    0.74 
  20   6   2  329.60    6.46 
  20  -6   2  335.22    6.07 
  22  -6   2    9.49    1.07 
  22   6   2   12.68    1.37 
  24   6   2   -0.49    0.43 
  24  -6   2   -0.49    0.41 
  24  -6   2   -0.18    0.47 
  26   6   2  295.91    6.47 
  26  -6   2  285.64    5.73 
  26  -6   2  285.16    6.36 
  28  -6   2   12.27    1.48 
  28  -6   2   11.49    1.28 
  28   6   2    9.36    1.34 
  30  -6   2    4.30    0.91 
  30  -6   2    4.67    1.11 
  30   6   2    4.47    1.11 
  32  -6   2  103.13    3.92 
  32   6   2   99.72    3.82 
  32  -6   2  101.47    3.24 
  34  -6   2   -0.05    0.66 
  34   6   2   -0.26    0.68 
  36   6   2    3.83    1.14 
  36  -6   2    2.40    1.05 
  38  -6   2  103.26    4.27 
  38   6   2   91.16    3.99 
  40   6   2    1.08    0.86 
  40  -6   2    0.02    0.82 
  42  -6   2    1.30    0.94 
  42   6   2    0.18    0.88 
  44   6   2   27.03    3.25 
  45   7  -2    2.90    1.13 
  43  -7  -2    6.05    1.43 
  43   7  -2    3.96    1.16 
  41  -7  -2    0.62    0.84 
  41   7  -2    0.37    0.78 
  39   7  -2    0.45    0.75 
  39  -7  -2    0.16    0.82 
  37   7  -2   38.68    2.50 
  37  -7  -2   44.76    2.79 
  35  -7  -2    0.80    0.71 
  35  -7  -2    0.89    0.77 
  35   7  -2    1.06    0.79 
  33  -7  -2    0.69    0.67 
  33  -7  -2    1.37    0.68 
  33   7  -2    0.27    0.65 
  31  -7  -2    2.72    0.84 
  31   7  -2    3.78    0.93 
  29   7  -2   -0.09    0.57 
  29  -7  -2   -0.15    0.49 
  27  -7  -2    0.99    0.62 
  27   7  -2    0.54    0.56 
  25   7  -2   71.25    2.61 
  25  -7  -2   73.08    2.58 
  23  -7  -2    1.05    0.58 
  23   7  -2    0.77    0.53 
  21  -7  -2   -0.59    0.39 
  21   7  -2   -0.35    0.34 
  21   7  -2   -0.28    0.37 
  19   7  -2  109.09    2.92 
  19   7  -2  106.19    2.90 
  19  -7  -2  111.76    3.02 
  17   7  -2    4.77    0.69 
  17   7  -2    4.82    0.73 
  17  -7  -2    4.61    0.75 
 -17  -7   2    4.29    0.32 
 -15  -7   2   14.69    0.61 
  15   7  -2   14.89    1.02 
  15  -7  -2   14.04    1.04 
  15   7  -2   14.25    0.99 
  13  -7  -2  585.09    9.00 
  13   7  -2  585.08    8.62 
 -13  -7   2  592.21    7.94 
  13   7  -2  596.69    8.82 
  11   7  -2   26.83    1.15 
  11  -7  -2   24.75    1.27 
  11   7  -2   23.74    1.14 
 -11  -7   2   24.46    0.91 
   9   7  -2   40.01    1.40 
   9   7  -2   40.56    1.35 
  -9  -7   2   37.41    1.21 
   9  -7  -2   39.52    1.54 
  -7  -7   2    5.28    0.59 
   7   7  -2    5.21    0.60 
   7   7  -2    5.87    0.60 
   7  -7  -2    5.53    0.69 
   5   7  -2    3.46    0.46 
   5   7  -2    4.02    0.53 
  -5  -7   2    3.25    0.50 
   5  -7  -2    4.48    0.62 
  -3  -7   2   38.09    1.33 
   3  -7  -2   37.66    1.36 
   3   7  -2   37.88    1.29 
  -3   7   2   39.57    1.40 
   3   7  -2   35.21    1.16 
   1   7  -2  366.13    5.58 
  -1   7   2  364.90    5.90 
   1  -7  -2  376.50    5.73 
  -1  -7   2  370.16    5.81 
   1   7  -2  359.58    5.53 
   1   7   2   39.83    1.42 
  -1  -7  -2   39.26    1.29 
   1   7   2   38.51    1.01 
   1  -7   2   38.18    1.41 
   3   7   2    3.36    0.38 
   3  -7   2    3.06    0.54 
  -3  -7  -2    3.25    0.45 
   3   7   2    2.95    0.50 
   5   7   2    0.81    0.39 
  -5  -7  -2    0.55    0.27 
   5  -7   2   -0.04    0.30 
   5   7   2    0.90    0.27 
   7   7   2    3.35    0.44 
   7  -7   2    2.58    0.57 
  -7  -7  -2    2.68    0.39 
   7   7   2    2.68    0.57 
   9   7   2   14.00    0.98 
   9   7   2   15.95    0.80 
   9  -7   2   14.51    0.99 
  -9  -7  -2   14.02    0.67 
  11  -7   2  384.60    6.50 
  11   7   2  391.84    6.65 
 -11  -7  -2  384.68    5.36 
  13  -7   2    9.64    1.01 
 -13  -7  -2    7.77    0.45 
  13   7   2    7.41    0.91 
  15  -7   2   23.08    1.37 
  15   7   2   22.23    1.40 
 -15  -7  -2   23.51    0.58 
  17  -7   2    3.95    0.77 
  17   7   2    3.69    0.77 
  19   7   2   67.34    2.52 
  19  -7   2   70.20    2.43 
  21  -7   2    0.63    0.52 
  21   7   2    0.33    0.57 
  23  -7   2   40.65    1.97 
  23   7   2   42.24    2.10 
  25   7   2    8.38    1.20 
  25  -7   2    7.75    1.07 
  27  -7   2   14.80    1.45 
  27   7   2   14.12    1.56 
  27  -7   2   11.93    1.40 
  29  -7   2   -0.41    0.56 
  29   7   2    0.72    0.65 
  29  -7   2    0.37    0.59 
  31  -7   2   17.07    1.84 
  31   7   2   18.95    1.94 
  31  -7   2   19.61    1.65 
  33   7   2    0.88    0.82 
  33  -7   2    1.97    0.77 
  33  -7   2    1.36    0.85 
  35   7   2    7.52    1.39 
  35  -7   2    6.06    1.34 
  37  -7   2    2.34    1.12 
  37   7   2    3.04    1.09 
  39   7   2    4.04    1.29 
  39  -7   2    3.38    1.22 
  41  -7   2    1.10    1.05 
  41   7   2    0.32    0.88 
  43   7   2   10.12    1.79 
  46   8  -2   10.02    1.95 
  44  -8  -2   17.10    2.55 
  44   8  -2   19.10    2.17 
  42  -8  -2    0.32    1.00 
  42   8  -2   -0.54    0.74 
  40  -8  -2    6.59    1.39 
  40   8  -2    7.46    1.40 
  38  -8  -2    0.64    0.87 
  38   8  -2    1.87    0.92 
  36  -8  -2    2.48    0.95 
  36  -8  -2    1.67    1.03 
  36   8  -2    2.36    0.99 
  34   8  -2   88.09    3.49 
  34  -8  -2   91.44    3.28 
  32  -8  -2   35.35    2.15 
  32   8  -2   33.55    2.15 
  30   8  -2    0.22    0.55 
  30  -8  -2   -0.81    0.62 
  28   8  -2   66.56    2.70 
  28  -8  -2   66.34    2.66 
  26   8  -2    5.16    0.91 
  26   8  -2    5.80    0.93 
  26  -8  -2    5.45    0.97 
  24   8  -2   12.95    1.27 
  24  -8  -2   11.36    1.30 
  24   8  -2   13.95    1.38 
  22   8  -2  145.80    3.69 
  22  -8  -2  141.82    3.76 
  22   8  -2  145.35    3.75 
  20   8  -2   73.28    2.46 
  20   8  -2   73.64    2.46 
  20  -8  -2   75.34    2.58 
  18  -8  -2    0.21    0.53 
  18   8  -2    1.37    0.53 
  18   8  -2    0.68    0.44 
 -16  -8   2   56.25    1.32 
  16   8  -2   60.98    2.04 
  16   8  -2   60.27    2.04 
  16  -8  -2   56.16    2.12 
 -14  -8   2   22.85    0.89 
  14  -8  -2   23.60    1.38 
  14   8  -2   22.89    1.22 
  14   8  -2   21.41    1.22 
  12  -8  -2   58.29    2.05 
  12   8  -2   57.78    1.89 
  12   8  -2   56.27    1.84 
 -12  -8   2   60.85    1.57 
 -10  -8   2  525.32    7.56 
  10   8  -2  525.80    7.94 
  10  -8  -2  524.88    8.25 
  10   8  -2  525.89    7.81 
   8   8  -2   16.93    0.97 
  -8  -8   2   15.95    0.90 
   8   8  -2   16.82    0.93 
   8  -8  -2   16.44    1.06 
   6   8  -2   52.62    1.63 
  -6  -8   2   50.23    1.58 
   6   8  -2   53.84    1.57 
   6  -8  -2   51.99    1.78 
  -4   8   2   79.64    2.22 
   4   8  -2   81.99    2.07 
  -4  -8   2   79.73    2.10 
   4  -8  -2   81.96    2.21 
   4   8  -2   78.94    1.97 
   2   8  -2   56.78    1.69 
   2   8  -2   55.26    1.59 
  -2   8   2   54.95    1.78 
   2  -8  -2   57.03    1.76 
  -2  -8   2   55.40    1.75 
   0   8   2   10.66    0.82 
   0   8   2   11.58    0.64 
   0  -8   2    9.82    0.84 
   0   8  -2   11.19    0.82 
   0  -8  -2   10.28    0.80 
   2   8   2  241.16    3.74 
   2  -8   2  246.00    4.53 
  -2  -8  -2  245.74    4.22 
   2   8   2  248.44    4.57 
  -4  -8  -2   16.10    0.87 
   4   8   2   15.02    0.98 
   4  -8   2   15.61    1.05 
   4   8   2   15.31    0.72 
   6  -8   2   37.21    1.54 
   6   8   2   38.50    1.57 
  -6  -8  -2   38.10    1.26 
   6   8   2   39.45    1.20 
   8  -8   2   88.77    2.51 
  -8  -8  -2   89.49    1.96 
   8   8   2   86.32    2.48 
   8   8   2   92.28    2.05 
 -10  -8  -2   34.20    1.10 
  10   8   2   35.31    1.62 
  10   8   2   34.76    1.27 
  10  -8   2   36.11    1.63 
  12   8   2   36.42    1.36 
 -12  -8  -2   37.97    1.09 
  12   8   2   41.47    1.79 
  12  -8   2   36.23    1.65 
 -14  -8  -2  375.69    5.13 
  14  -8   2  369.35    6.58 
  14   8   2  361.29    6.67 
  16  -8   2   15.84    1.26 
  16   8   2   14.76    1.27 
  18  -8   2   83.98    2.74 
  18   8   2   82.41    2.84 
  20   8   2   63.27    2.55 
  20  -8   2   71.40    2.55 
  22   8   2   17.22    1.50 
  22  -8   2   17.24    1.48 
  24  -8   2    4.33    0.93 
  24   8   2    2.91    0.76 
  26   8   2  101.22    3.54 
  26  -8   2   97.37    3.23 
  28  -8   2    0.12    0.56 
  28  -8   2    0.87    0.64 
  28   8   2   -0.87    0.59 
  30  -8   2   32.11    2.25 
  30   8   2   33.45    2.29 
  30  -8   2   26.82    1.91 
  32  -8   2   21.25    1.75 
  32  -8   2   21.53    2.15 
  32   8   2   22.82    2.05 
  34  -8   2    6.52    1.22 
  34  -8   2    8.51    1.54 
  34   8   2    6.93    1.32 
  36  -8   2    3.31    1.11 
  36   8   2    1.96    0.87 
  38   8   2   26.04    2.34 
  38  -8   2   30.20    2.43 
  40  -8   2    0.50    0.80 
  40   8   2    0.23    0.86 
  42  -8   2   11.86    1.87 
  42   8   2   12.97    2.06 
  45   9  -2    0.80    0.93 
  43   9  -2   82.67    3.85 
  43  -9  -2   82.83    4.26 
  43   9  -2   82.20    3.90 
  41   9  -2    2.74    1.08 
  41   9  -2    4.81    1.27 
  41  -9  -2    2.87    1.17 
  39   9  -2    6.16    1.29 
  39   9  -2    5.73    1.27 
  39  -9  -2    8.73    1.59 
  37   9  -2   15.80    1.87 
  37  -9  -2   17.71    2.16 
  37  -9  -2   15.12    1.75 
  37   9  -2   17.40    1.96 
  35   9  -2   27.91    2.18 
  35   9  -2   25.10    1.99 
  35  -9  -2   23.59    1.91 
  33  -9  -2    0.73    0.72 
  33   9  -2    0.50    0.73 
  33   9  -2   -0.06    0.60 
  31   9  -2  242.12    5.84 
  31   9  -2  259.19    6.13 
  31  -9  -2  261.10    5.96 
  29  -9  -2   13.86    1.55 
  29   9  -2   13.51    1.47 
  29   9  -2   15.46    1.59 
  27   9  -2   10.92    1.33 
  27   9  -2    7.75    1.13 
  27  -9  -2    9.58    1.32 
  25   9  -2    2.54    0.76 
  25  -9  -2    1.80    0.71 
  25   9  -2    3.03    0.76 
  23   9  -2   43.65    2.07 
  23   9  -2   40.45    1.98 
  23  -9  -2   40.20    2.06 
  21   9  -2    2.21    0.72 
  21   9  -2    1.88    0.69 
  21  -9  -2    2.43    0.74 
  19   9  -2  654.35   10.13 
  19   9  -2  660.26   10.39 
  19  -9  -2  661.66   10.60 
  17   9  -2   21.05    1.32 
  17  -9  -2   19.24    1.37 
  17   9  -2   20.93    1.32 
  15  -9  -2    9.95    1.12 
  15   9  -2    9.92    1.02 
 -15  -9   2   12.03    0.71 
  15   9  -2   11.98    0.98 
  13   9  -2   47.08    1.74 
  13   9  -2   48.10    1.78 
 -13  -9   2   45.23    1.41 
  13  -9  -2   46.28    1.94 
  11   9  -2   67.81    2.09 
 -11  -9   2   69.22    1.89 
  11  -9  -2   71.44    2.35 
  11   9  -2   71.94    2.13 
   9  -9  -2    0.46    0.47 
   9   9  -2   -0.30    0.34 
   9   9  -2   -0.01    0.34 
  -9  -9   2    0.37    0.34 
  -7  -9   2 1483.60   19.21 
   7  -9  -2 1481.03   19.69 
   7   9  -2 1427.54   18.84 
   7   9  -2 1470.21   19.42 
   5   9  -2    5.24    0.70 
  -5  -9   2    5.60    0.72 
   5   9  -2    5.82    0.71 
   5  -9  -2    5.09    0.75 
  -3  -9   2    1.01    0.43 
  -3   9   2    0.36    0.38 
   3   9  -2    0.24    0.35 
   3  -9  -2    1.06    0.46 
   3   9  -2    0.52    0.35 
  -1  -9   2    0.75    0.44 
  -1   9   2    0.06    0.33 
   1   9  -2    0.42    0.38 
   1  -9  -2   -0.06    0.32 
   1   9  -2    0.36    0.31 
   1   9   2   27.56    1.33 
  -1  -9  -2   25.62    1.21 
   1   9   2   26.04    0.96 
   1  -9   2   26.70    1.36 
   3  -9   2   23.04    1.30 
  -3  -9  -2   22.79    1.11 
   3   9   2   24.16    1.28 
   3   9   2   23.20    0.94 
  -5  -9  -2 1094.03   14.55 
   5   9   2 1087.22   15.37 
   5  -9   2 1100.86   15.25 
   5   9   2 1090.61   13.94 
   7   9   2    9.12    1.00 
  -7  -9  -2   10.17    0.75 
   7  -9   2   10.57    1.09 
   7   9   2    9.29    0.68 
   9   9   2    8.27    0.71 
   9   9   2    7.20    0.89 
  -9  -9  -2    8.29    0.73 
   9  -9   2    7.23    0.88 
  11  -9   2   18.72    1.29 
 -11  -9  -2   21.02    0.91 
  11   9   2   17.62    1.23 
  11   9   2   21.28    1.06 
 -13  -9  -2    0.39    0.27 
  13   9   2    0.43    0.46 
  13   9   2    0.74    0.41 
  13  -9   2    0.37    0.54 
  15   9   2    5.33    0.74 
  15   9   2    4.20    0.87 
  15  -9   2    4.66    0.86 
  17   9   2  500.37    8.74 
  17  -9   2  495.97    8.55 
  19  -9   2    1.89    0.70 
  19   9   2    1.29    0.62 
  21   9   2   -0.60    0.46 
  21  -9   2   -0.67    0.51 
  23  -9   2    4.24    0.97 
  23   9   2    3.92    0.90 
  25   9   2    9.29    1.31 
  25  -9   2    8.66    1.19 
  27  -9   2   13.91    1.54 
  27   9   2   11.40    1.49 
  29  -9   2  160.12    4.87 
  29   9   2  154.62    4.81 
  29  -9   2  160.40    4.48 
  31   9   2    0.69    0.85 
  31  -9   2    0.05    0.69 
  31  -9   2    0.62    0.83 
  33  -9   2    1.46    0.84 
  33   9   2    2.54    1.01 
  33  -9   2    2.96    0.93 
  35   9   2    2.33    0.94 
  35  -9   2    1.57    0.87 
  35  -9   2    1.71    1.04 
  37   9   2    7.05    1.47 
  37  -9   2    6.97    1.53 
  39   9   2   12.12    1.94 
  39  -9   2   10.78    1.79 
  41   9   2   22.81    2.50 
  41  -9   2   22.08    2.47 
  44  10  -2    4.34    1.32 
  42  10  -2    9.40    1.63 
  42  10  -2    8.88    1.55 
  42 -10  -2    6.30    1.58 
  40  10  -2    9.37    1.59 
  40 -10  -2   11.42    1.77 
  40  10  -2    9.19    1.59 
  38 -10  -2    5.11    1.25 
  38  10  -2    4.65    1.24 
  38  10  -2    3.07    1.05 
  38 -10  -2    4.02    1.18 
  36 -10  -2    7.69    1.46 
  36  10  -2    6.73    1.28 
  36  10  -2    6.71    1.34 
  34  10  -2    3.95    1.09 
  34 -10  -2    8.32    1.34 
  34  10  -2    5.15    1.15 
  32  10  -2    6.91    1.27 
  32 -10  -2    7.02    1.28 
  32  10  -2    7.50    1.29 
  30  10  -2    3.34    1.01 
  30  10  -2    3.73    1.04 
  30 -10  -2    3.49    1.01 
  28 -10  -2   21.85    1.77 
  28  10  -2   21.23    1.67 
  28  10  -2   17.54    1.58 
  26  10  -2    7.16    1.13 
  26  10  -2    6.68    1.07 
  26 -10  -2    7.00    1.17 
  24  10  -2   23.45    1.60 
  24  10  -2   23.64    1.68 
  24 -10  -2   24.21    1.75 
  22  10  -2   61.38    2.43 
  22 -10  -2   67.55    2.68 
  22  10  -2   58.57    2.36 
  20  10  -2    8.43    1.08 
  20 -10  -2    6.86    1.03 
  20  10  -2    6.70    1.01 
  18 -10  -2    3.97    0.91 
  18  10  -2    4.35    0.81 
  18  10  -2    4.78    0.82 
  16 -10  -2   10.23    1.14 
  16  10  -2   10.70    1.10 
  16  10  -2   12.51    1.13 
  14  10  -2    3.48    0.70 
  14 -10  -2    3.29    0.72 
 -14 -10   2    4.74    0.58 
  14  10  -2    5.27    0.77 
  12 -10  -2    3.53    0.75 
  12  10  -2    2.27    0.54 
  12  10  -2    3.65    0.64 
 -12 -10   2    2.38    0.50 
  10  10  -2  333.01    5.75 
 -10 -10   2  333.18    5.59 
  10 -10  -2  336.83    6.22 
  10  10  -2  339.00    5.86 
  -8 -10   2    4.76    0.71 
   8  10  -2    2.91    0.60 
   8 -10  -2    3.97    0.76 
   8  10  -2    3.46    0.62 
   6 -10  -2    0.78    0.50 
  -6 -10   2    1.01    0.42 
   6  10  -2    0.74    0.39 
   6  10  -2    1.19    0.43 
   4 -10  -2   56.63    2.00 
  -4  10   2   51.96    1.92 
   4  10  -2   57.78    1.81 
   4  10  -2   53.28    1.79 
  -4 -10   2   55.46    1.91 
   2  10  -2    2.04    0.52 
   2 -10  -2    2.25    0.59 
  -2  10   2    1.96    0.54 
  -2 -10   2    2.22    0.57 
   2  10  -2    2.06    0.47 
   0  10   2    9.78    1.00 
   0 -10  -2    8.69    0.87 
   0  10   2    7.88    0.71 
   0 -10   2    9.25    1.00 
   2 -10   2  640.52    9.90 
   2  10   2  658.93   10.01 
   2  10   2  641.81    8.80 
  -2 -10  -2  649.14    9.55 
   4 -10   2    0.77    0.46 
   4  10   2    0.66    0.43 
  -4 -10  -2    0.41    0.40 
   4  10   2    0.57    0.33 
  -6 -10  -2    8.53    0.81 
   6  10   2    8.62    0.95 
   6  10   2    8.48    0.70 
   6 -10   2    9.30    1.07 
   8  10   2   70.57    1.90 
   8  10   2   69.69    2.36 
  -8 -10  -2   78.17    2.03 
   8 -10   2   71.25    2.42 
  10 -10   2   20.89    1.44 
 -10 -10  -2   23.16    1.05 
  10  10   2   22.62    1.12 
  10  10   2   22.13    1.43 
  12  10   2   10.14    1.13 
  12 -10   2   10.34    1.19 
  12  10   2   10.52    0.88 
 -12 -10  -2   10.80    0.75 
  14  10   2  563.81    8.47 
  14  10   2  561.46    9.49 
  14 -10   2  561.44    9.40 
  16  10   2    7.78    1.08 
  16  10   2   12.20    1.00 
  16 -10   2   11.47    1.28 
  18  10   2   23.34    1.65 
  18 -10   2   24.53    1.72 
  18  10   2   25.50    1.42 
  20 -10   2  111.26    3.52 
  20  10   2  116.65    3.18 
  20  10   2  117.76    3.62 
  22 -10   2   -0.34    0.62 
  22  10   2   -0.31    0.57 
  24 -10   2   13.00    1.48 
  24  10   2   10.10    1.41 
  26  10   2  309.42    7.06 
  26 -10   2  320.77    6.82 
  28  10   2    0.17    0.81 
  28 -10   2    1.50    0.84 
  30 -10   2    6.45    1.23 
  30  10   2    6.40    1.29 
  32 -10   2   55.83    3.04 
  32 -10   2   54.93    2.74 
  32  10   2   50.35    2.87 
  34 -10   2    1.59    0.86 
  34 -10   2    0.12    0.76 
  34  10   2   -0.28    0.68 
  36 -10   2    1.92    1.08 
  36 -10   2    4.63    1.18 
  36  10   2    3.59    1.20 
  38  10   2   92.64    4.19 
  38 -10   2  103.42    4.48 
  40 -10   2    0.02    0.85 
  40  10   2   -2.62    0.70 
  43  11  -2   14.28    2.00 
  41 -11  -2    3.33    1.36 
  41  11  -2    2.44    1.10 
  41  11  -2    4.70    1.27 
  39 -11  -2    0.63    0.90 
  39  11  -2    0.81    0.86 
  39  11  -2   -0.27    0.75 
  39 -11  -2    0.57    0.85 
  37 -11  -2   59.07    3.09 
  37  11  -2   51.37    2.92 
  37  11  -2   52.19    3.00 
  35  11  -2   -0.98    0.60 
  35  11  -2    0.27    0.76 
  35 -11  -2   -0.67    0.83 
  33  11  -2   -0.32    0.60 
  33 -11  -2   -0.12    0.78 
  33  11  -2   -0.34    0.64 
  31  11  -2   99.90    3.69 
  31 -11  -2  102.45    3.79 
  31  11  -2  100.78    3.64 
  29  11  -2   13.17    1.60 
  29  11  -2   14.49    1.65 
  29 -11  -2   14.67    1.69 
  27  11  -2   -0.11    0.59 
  27 -11  -2   -0.39    0.66 
  27  11  -2    0.29    0.58 
  25  11  -2  200.34    5.01 
  25  11  -2  203.41    4.97 
  25 -11  -2  215.34    5.35 
  23  11  -2    0.14    0.55 
  23  11  -2    1.23    0.65 
  23 -11  -2    0.53    0.75 
  21  11  -2    0.36    0.51 
  21 -11  -2    2.03    0.77 
  21  11  -2    0.42    0.59 
  19 -11  -2  155.40    4.24 
  19  11  -2  150.77    3.88 
  19  11  -2  160.47    4.00 
  17  11  -2   -0.18    0.47 
  17  11  -2    0.67    0.53 
  17 -11  -2    0.04    0.65 
  15 -11  -2    0.77    0.67 
  15  11  -2    0.30    0.47 
  15  11  -2    0.40    0.59 
 -13 -11   2  273.97    4.87 
  13  11  -2  283.78    5.39 
  13  11  -2  279.16    5.30 
  13 -11  -2  274.57    5.75 
  11 -11  -2    2.75    0.76 
  11  11  -2    2.66    0.62 
  11  11  -2    3.25    0.66 
 -11 -11   2    3.42    0.61 
  -9 -11   2    3.61    0.65 
   9 -11  -2    2.83    0.73 
   9  11  -2    3.19    0.63 
   9  11  -2    3.03    0.64 
   7  11  -2  223.00    4.38 
  -7 -11   2  226.86    4.45 
   7  11  -2  217.41    4.35 
   7 -11  -2  219.95    4.73 
   5  11  -2   10.49    1.00 
   5  11  -2   10.61    0.92 
   5 -11  -2    8.89    1.02 
  -5 -11   2    8.45    0.93 
  -3  11   2   58.94    2.18 
  -3 -11   2   59.09    2.10 
   3  11  -2   59.47    2.02 
   3  11  -2   58.08    1.93 
   3 -11  -2   61.70    2.19 
   1  11  -2  743.20   10.78 
  -1 -11   2  728.92   11.00 
   1  11  -2  736.24   10.56 
   1 -11  -2  720.39   10.86 
  -1  11   2  715.18   11.11 
  -1 -11  -2    0.29    0.43 
   1  11   2   -0.01    0.40 
   1 -11   2    0.87    0.50 
   1  11   2    0.50    0.34 
   3  11   2    4.37    0.58 
  -3 -11  -2    3.24    0.64 
   3 -11   2    3.10    0.75 
   3  11   2    3.18    0.65 
   5  11   2   83.48    2.66 
  -5 -11  -2   83.11    2.36 
   5 -11   2   87.20    2.75 
   5  11   2   85.23    2.10 
   7  11   2   31.66    1.68 
  -7 -11  -2   31.03    1.37 
   7  11   2   31.12    1.27 
   9  11   2   14.62    1.40 
  -9 -11  -2   13.72    0.95 
   9  11   2   14.24    0.96 
   9 -11   2   13.39    1.35 
 -11 -11  -2  206.95    3.78 
  11  11   2  192.82    4.57 
  11 -11   2  201.15    4.69 
  11  11   2  203.45    3.92 
  13  11   2    3.44    0.62 
  13  11   2    2.02    0.74 
  13 -11   2    3.49    0.79 
  15  11   2    4.25    0.71 
  15 -11   2    4.81    1.01 
  15  11   2    4.20    0.93 
  17  11   2   38.13    2.06 
  17 -11   2   41.52    2.19 
  17  11   2   39.67    1.76 
  19  11   2   16.35    1.23 
  19  11   2   18.40    1.76 
  19 -11   2   13.40    1.48 
  21  11   2   -1.60    0.55 
  21  11   2    0.24    0.53 
  21 -11   2    0.46    0.71 
  23  11   2   80.44    2.81 
  23 -11   2   85.02    3.24 
  23  11   2   81.69    3.25 
  25  11   2    9.35    1.19 
  25 -11   2    8.93    1.39 
  25  11   2    9.05    1.39 
  27 -11   2   19.97    1.93 
  27  11   2   19.72    1.98 
  27  11   2   19.99    1.59 
  29  11   2    6.08    1.30 
  29 -11   2    5.94    1.22 
  29  11   2    7.01    1.14 
  31  11   2   25.34    1.93 
  31 -11   2   28.14    2.21 
  31  11   2   25.01    2.11 
  33 -11   2    4.39    1.14 
  33 -11   2    3.64    1.14 
  33  11   2    2.95    1.16 
  33  11   2    4.46    1.10 
  35 -11   2    0.65    0.80 
  35  11   2   -1.21    0.58 
  35 -11   2    0.63    0.80 
  35  11   2   -1.10    0.77 
  37 -11   2    6.85    1.49 
  37  11   2    7.89    1.42 
  37  11   2    8.13    1.65 
  37 -11   2    8.44    1.62 
  39  11   2    0.21    0.71 
  39  11   2    1.09    1.06 
  39 -11   2    0.18    0.98 
  41  11   2   -0.59    0.69 
  42  12  -2    1.48    1.10 
  40  12  -2    0.36    0.92 
  40 -12  -2    1.67    1.10 
  40  12  -2    3.09    1.17 
  38 -12  -2   -0.04    0.81 
  38  12  -2    0.27    0.83 
  38  12  -2    0.76    0.86 
  36  12  -2   10.18    1.62 
  36  12  -2   12.99    1.78 
  36 -12  -2   14.83    1.90 
  34  12  -2   63.95    3.10 
  34  12  -2   60.02    3.03 
  34 -12  -2   63.84    3.27 
  32  12  -2    4.66    1.08 
  32 -12  -2    4.05    1.19 
  32  12  -2    5.64    1.18 
  30  12  -2    9.45    1.38 
  30  12  -2   10.57    1.50 
  30 -12  -2    9.16    1.51 
  28 -12  -2   23.51    2.02 
  28  12  -2   20.94    1.77 
  28  12  -2   23.64    1.85 
  26 -12  -2    6.67    1.24 
  26  12  -2    6.13    1.12 
  26  12  -2    4.46    0.99 
  24  12  -2   41.30    2.27 
  24 -12  -2   42.83    2.44 
  24  12  -2   40.13    2.15 
  22  12  -2  110.69    3.43 
  22 -12  -2  104.28    3.64 
  22  12  -2  111.42    3.46 
  20 -12  -2   35.19    2.14 
  20  12  -2   40.05    2.03 
  20  12  -2   35.17    1.90 
  18  12  -2   10.72    1.23 
  18  12  -2    9.33    1.14 
  18 -12  -2   11.48    1.44 
  16  12  -2   31.85    1.71 
  16 -12  -2   32.64    1.96 
  16  12  -2   35.74    1.79 
  14  12  -2    3.51    0.79 
  14 -12  -2    4.29    0.91 
  14  12  -2    4.39    0.83 
  12  12  -2   35.64    1.71 
 -12 -12   2   33.39    1.52 
  12  12  -2   31.04    1.66 
  12 -12  -2   35.81    2.00 
  10  12  -2   60.12    2.18 
  10 -12  -2   59.63    2.44 
  10  12  -2   60.41    2.17 
 -10 -12   2   59.56    2.05 
   8 -12  -2   51.77    2.20 
  -8 -12   2   53.32    2.01 
   8  12  -2   56.93    2.08 
   8  12  -2   59.26    2.09 
   6  12  -2   34.76    1.62 
  -6 -12   2   33.02    1.64 
   6  12  -2   34.35    1.57 
   6 -12  -2   35.64    1.82 
   4  12  -2  151.29    3.51 
   4  12  -2  151.42    3.49 
   4 -12  -2  153.07    3.81 
  -4 -12   2  152.50    3.68 
   2  12  -2   51.84    1.92 
  -2 -12   2   51.98    2.08 
   2  12  -2   52.66    1.99 
   2 -12  -2   54.62    2.13 
  -2  12   2   52.46    2.09 
   0  12   2   25.94    1.54 
   0 -12   2   26.83    1.57 
   0 -12  -2   25.34    1.49 
   2  12   2   24.85    1.19 
   2  12   2   23.53    1.49 
   2 -12   2   26.34    1.60 
  -2 -12  -2   24.98    1.46 
   4  12   2   77.13    2.62 
   4 -12   2   76.44    2.63 
  -4 -12  -2   73.46    2.32 
   4  12   2   74.17    2.04 
   6 -12   2   41.22    2.02 
   6  12   2   45.05    2.05 
  -6 -12  -2   44.74    1.75 
   6  12   2   43.99    1.58 
   8 -12   2  203.90    4.81 
   8  12   2  211.16    4.81 
   8  12   2  211.72    4.00 
  -8 -12  -2  210.10    4.16 
 -10 -12  -2   30.20    1.38 
  10 -12   2   29.65    1.81 
  10  12   2   28.15    1.75 
  10  12   2   27.78    1.35 
  12  12   2    1.37    0.53 
  12  12   2    1.27    0.64 
  12 -12   2    1.29    0.69 
  14  12   2   10.31    1.28 
  14 -12   2   16.48    1.61 
  14  12   2   13.97    1.11 
  16 -12   2    5.33    0.98 
  16  12   2    4.57    0.91 
  16  12   2    5.73    0.84 
  18 -12   2   26.19    1.91 
  18  12   2   27.59    1.54 
  18  12   2   27.38    1.82 
  20  12   2  177.40    4.83 
  20 -12   2  173.51    4.79 
  20  12   2  172.45    4.13 
  22 -12   2   38.63    2.32 
  22  12   2   45.69    2.09 
  22  12   2   39.95    2.30 
  24  12   2    5.79    1.14 
  24  12   2    5.28    1.01 
  24 -12   2    5.42    1.15 
  26 -12   2    6.22    1.20 
  26  12   2    7.15    1.32 
  26  12   2    6.31    1.10 
  28  12   2    3.97    0.97 
  28  12   2    1.76    0.92 
  28 -12   2    2.07    0.99 
  30  12   2   13.71    1.58 
  30  12   2   11.40    1.70 
  30 -12   2    7.61    1.39 
  32  12   2   67.83    3.06 
  32 -12   2   72.01    3.35 
  32  12   2   74.23    3.53 
  34  12   2    4.54    1.26 
  34 -12   2    3.53    1.17 
  34  12   2    3.28    1.04 
  34 -12   2    4.13    1.25 
  36 -12   2   -0.27    0.65 
  36  12   2    0.14    0.78 
  36  12   2    1.08    0.93 
  36 -12   2    0.13    0.94 
  38  12   2    0.01    0.87 
  38 -12   2    3.11    1.24 
  38  12   2    1.68    0.92 
  40  12   2    0.01    0.71 
  39  13  -2    2.56    1.00 
  39  13  -2    2.85    1.21 
  39 -13  -2    1.36    1.00 
  37 -13  -2   13.38    1.93 
  37  13  -2   10.99    1.75 
  37  13  -2   10.67    1.66 
  35  13  -2   11.66    1.71 
  35  13  -2   10.51    1.61 
  35 -13  -2   11.88    1.78 
  33  13  -2    0.15    0.75 
  33  13  -2   -0.65    0.73 
  33 -13  -2   -0.98    0.72 
  31  13  -2   38.22    2.40 
  31 -13  -2   31.39    2.43 
  31  13  -2   36.42    2.33 
  29  13  -2    3.11    0.94 
  29  13  -2    2.22    0.88 
  29 -13  -2    2.26    1.11 
  27  13  -2    6.04    1.14 
  27  13  -2    5.97    1.14 
  27 -13  -2    4.74    1.23 
  25 -13  -2   19.77    1.98 
  25  13  -2   19.14    1.85 
  25  13  -2   20.06    1.74 
  23  13  -2   60.56    2.65 
  23  13  -2   58.17    2.64 
  23 -13  -2   54.96    2.76 
  21  13  -2    0.73    0.61 
  21 -13  -2    0.95    0.79 
  21  13  -2   -0.32    0.61 
  19 -13  -2   83.09    3.25 
  19  13  -2   84.54    2.96 
  19  13  -2   87.42    2.96 
  17 -13  -2   -0.67    0.58 
  17  13  -2    0.91    0.61 
  17  13  -2    0.37    0.53 
  15  13  -2   10.58    1.15 
  15 -13  -2    9.94    1.30 
  15  13  -2   12.12    1.28 
  13  13  -2  111.49    3.16 
  13 -13  -2  106.14    3.46 
  13  13  -2  107.56    3.14 
  11  13  -2    4.17    0.81 
  11 -13  -2    3.37    0.82 
 -11 -13   2    3.85    0.73 
  11  13  -2    3.78    0.76 
   9 -13  -2    8.26    1.17 
  -9 -13   2    5.13    0.83 
   9  13  -2    5.22    0.86 
   9  13  -2    7.42    1.00 
   7  13  -2  462.42    7.66 
  -7 -13   2  463.66    7.85 
   7 -13  -2  454.34    8.21 
   7  13  -2  463.26    7.82 
   5 -13  -2   58.78    2.34 
   5  13  -2   57.58    2.15 
  -5 -13   2   59.86    2.29 
   5  13  -2   58.78    2.17 
  -3 -13   2   -0.44    0.44 
   3  13  -2   -0.33    0.38 
   3  13  -2    0.25    0.52 
   3 -13  -2    0.80    0.53 
  -3  13   2   -0.23    0.36 
  -1 -13   2   87.97    2.85 
  -1  13   2   87.67    2.86 
   1 -13  -2   82.96    2.73 
  -1 -13  -2   16.43    1.26 
   1  13   2   18.82    1.43 
   1 -13   2   16.12    1.38 
   3  13   2    8.40    0.88 
   3 -13   2    8.45    1.12 
   3  13   2    7.19    0.99 
  -3 -13  -2    8.85    1.03 
   5  13   2  149.37    3.22 
  -5 -13  -2  142.87    3.51 
   5 -13   2  151.14    4.04 
   5  13   2  147.02    3.90 
   7  13   2    1.20    0.62 
   7  13   2   -0.08    0.38 
  -7 -13  -2    1.32    0.53 
   7 -13   2    0.51    0.66 
  -9 -13  -2    9.13    0.98 
   9  13   2   10.79    1.02 
   9 -13   2    8.95    1.24 
   9  13   2    8.82    1.12 
  11 -13   2   80.82    3.02 
  11  13   2   80.42    2.38 
  11  13   2   75.17    2.82 
  13  13   2    6.15    0.85 
  13 -13   2    4.39    1.06 
  13  13   2    5.10    0.92 
  15  13   2   14.76    1.18 
  15 -13   2   12.71    1.48 
  15  13   2   14.90    1.57 
  17  13   2  108.70    3.08 
  17  13   2  107.92    3.67 
  17 -13   2  110.16    3.76 
  19 -13   2    5.61    1.15 
  19  13   2    4.17    1.06 
  19  13   2    6.47    0.98 
  21 -13   2   -0.38    0.63 
  21  13   2    0.41    0.74 
  21  13   2   -0.26    0.45 
  23  13   2   18.55    1.53 
  23  13   2   18.33    1.89 
  23 -13   2   20.78    2.01 
  25  13   2    2.66    0.99 
  25  13   2    3.27    0.86 
  25 -13   2    1.92    0.95 
  27  13   2   16.02    1.62 
  27  13   2   14.06    1.78 
  27 -13   2   16.58    1.90 
  29  13   2   57.24    2.65 
  29  13   2   55.11    3.06 
  29 -13   2   55.65    3.00 
  31 -13   2    2.43    1.11 
  31  13   2    4.41    1.05 
  31  13   2    1.85    0.93 
  33 -13   2    0.35    0.85 
  33  13   2    0.34    0.89 
  33  13   2    0.86    0.70 
  35  13   2    6.30    1.46 
  35 -13   2    7.23    1.50 
  35 -13   2    3.94    1.31 
  35  13   2    6.27    1.30 
  37 -13   2    0.61    0.95 
  37  13   2   -0.31    0.64 
  37  13   2    0.47    0.95 
  37 -13   2   -0.78    0.69 
  39  13   2    5.19    1.22 
  40 -14  -2    6.54    1.60 
  38 -14  -2   20.62    2.39 
  38  14  -2   20.74    2.33 
  36 -14  -2   -0.75    0.94 
  36  14  -2   -0.03    0.73 
  36  14  -2   -0.35    0.81 
  34  14  -2   15.02    1.88 
  34 -14  -2   19.59    2.22 
  34  14  -2   11.59    1.73 
  32  14  -2   14.13    1.82 
  32  14  -2   13.00    1.71 
  32 -14  -2   11.53    1.77 
  30  14  -2    0.44    0.87 
  30  14  -2    0.00    0.76 
  30 -14  -2    1.32    1.00 
  28  14  -2   10.82    1.47 
  28  14  -2   12.87    1.61 
  28 -14  -2   14.19    1.93 
  26  14  -2    7.62    1.28 
  26  14  -2    9.52    1.42 
  26 -14  -2    8.07    1.43 
  24  14  -2    1.63    0.78 
  24  14  -2    1.04    0.75 
  24 -14  -2    0.89    0.92 
  22  14  -2   63.09    2.69 
  22 -14  -2   62.82    3.03 
  22  14  -2   66.03    2.78 
  20  14  -2   28.19    1.89 
  20  14  -2   28.52    1.85 
  20 -14  -2   29.98    2.18 
  18  14  -2    6.95    1.13 
  18 -14  -2    7.66    1.32 
  18  14  -2    7.72    1.18 
  16  14  -2    4.90    0.93 
  16  14  -2    4.70    0.91 
  16 -14  -2    3.81    1.04 
  14 -14  -2   21.09    1.71 
  14  14  -2   25.20    1.61 
  14  14  -2   25.19    1.59 
  12  14  -2   14.15    1.38 
  12 -14  -2   12.79    1.42 
  12  14  -2   12.95    1.33 
  10  14  -2  157.89    3.95 
  10 -14  -2  165.35    4.46 
 -10 -14   2  168.61    3.99 
  10  14  -2  165.53    4.08 
  -8 -14   2   24.70    1.56 
   8 -14  -2   23.27    1.64 
   8  14  -2   19.56    1.41 
   8  14  -2   22.81    1.50 
   6  14  -2    6.28    0.93 
   6 -14  -2    6.44    1.00 
  -6 -14   2    5.94    0.96 
   6  14  -2    5.40    0.88 
   4  14  -2    1.33    0.59 
   4 -14  -2    1.94    0.74 
  -4 -14   2    0.95    0.59 
   4  14  -2    0.98    0.56 
   2 -14  -2    1.85    0.65 
  -2  14   2    2.25    0.72 
  -2 -14   2    1.31    0.64 
   0 -14   2    7.22    1.05 
   0 -14  -2    9.66    1.19 
   0  14   2    7.76    1.06 
   2 -14   2   74.53    2.79 
   2  14   2   76.59    2.75 
  -2 -14  -2   73.40    2.57 
   4  14   2    6.91    1.08 
  -4 -14  -2    5.34    0.88 
   4 -14   2    5.71    1.01 
   4  14   2    5.82    0.80 
  -6 -14  -2   63.02    2.29 
   6 -14   2   60.24    2.58 
   6  14   2   64.21    2.58 
   6  14   2   65.85    2.10 
   8 -14   2   -0.23    0.58 
   8  14   2   -0.49    0.53 
  -8 -14  -2    2.23    0.62 
   8  14   2    0.26    0.45 
  10  14   2    6.81    1.10 
  10  14   2    5.80    0.84 
  10 -14   2    6.69    1.21 
  12  14   2   36.10    1.65 
  12 -14   2   29.82    2.04 
  12  14   2   28.96    1.89 
  14  14   2  175.84    4.02 
  14 -14   2  183.01    4.98 
  14  14   2  179.02    4.84 
  16  14   2    1.30    0.64 
  16  14   2    0.34    0.73 
  16 -14   2    0.66    0.78 
  18  14   2   19.99    1.79 
  18  14   2   21.54    1.48 
  18 -14   2   17.32    1.86 
  20  14   2    1.37    0.78 
  20 -14   2    0.03    0.79 
  20  14   2    0.40    0.56 
  22 -14   2    1.56    0.94 
  22  14   2    0.77    0.59 
  22  14   2    0.50    0.74 
  24  14   2   13.63    1.77 
  24  14   2   12.43    1.42 
  24 -14   2    9.63    1.54 
  26  14   2  115.61    4.25 
  26  14   2  115.10    3.69 
  26 -14   2  122.18    4.39 
  28  14   2   -0.09    0.67 
  28 -14   2    0.65    0.92 
  28  14   2   -0.90    0.73 
  30 -14   2   13.33    1.81 
  30  14   2   10.55    1.50 
  30  14   2   13.19    1.85 
  32 -14   2    1.13    1.01 
  32  14   2    1.49    0.99 
  32  14   2    0.77    0.78 
  34 -14   2   -0.27    0.79 
  34  14   2    0.60    1.14 
  34  14   2    1.09    0.97 
  36 -14   2   11.97    1.85 
  36 -14   2   10.71    2.01 
  36  14   2   13.06    2.00 
  38 -14   2   41.28    2.88 
  37  15  -2   27.98    2.30 
  37 -15  -2   24.98    2.63 
  35  15  -2    0.23    0.76 
  35 -15  -2    0.95    1.10 
  33  15  -2    1.32    0.93 
  33 -15  -2   -0.16    0.99 
  33  15  -2    0.15    0.78 
  31 -15  -2   54.27    3.24 
  31  15  -2   47.73    2.74 
  31  15  -2   52.64    2.93 
  29 -15  -2   22.17    2.33 
  29  15  -2   24.15    2.06 
  29  15  -2   22.72    1.96 
  27  15  -2    0.20    0.74 
  27  15  -2    1.04    0.76 
  27 -15  -2    1.38    1.00 
  25  15  -2   78.14    3.16 
  25 -15  -2   74.32    3.51 
  25  15  -2   74.23    3.11 
  23  15  -2    5.13    1.04 
  23  15  -2    5.60    1.10 
  23 -15  -2    5.35    1.35 
  21  15  -2    0.16    0.64 
  21 -15  -2    0.45    0.84 
  21  15  -2    0.17    0.66 
  19  15  -2  128.78    3.95 
  19  15  -2  128.82    3.87 
  19 -15  -2  130.44    4.35 
  17  15  -2   41.67    2.20 
  17 -15  -2   50.33    2.68 
  17  15  -2   42.79    2.20 
  15  15  -2   23.17    1.67 
  15  15  -2   25.15    1.76 
  15 -15  -2   21.89    1.85 
  13  15  -2  212.07    4.88 
  13 -15  -2  204.42    5.35 
  13  15  -2  209.19    4.94 
  11  15  -2   18.74    1.50 
  11  15  -2   22.35    1.58 
  11 -15  -2   20.15    1.91 
  -9 -15   2    2.15    0.70 
   9 -15  -2    3.09    0.90 
   9  15  -2    2.24    0.75 
   9  15  -2    1.26    0.64 
  -7 -15   2  114.90    3.43 
   7  15  -2  118.67    3.40 
   7  15  -2  115.77    3.33 
   7 -15  -2  109.85    3.64 
   5  15  -2    2.18    0.75 
   5 -15  -2    1.98    0.80 
   5  15  -2    2.13    0.76 
  -5 -15   2    2.64    0.76 
  -3 -15   2    0.34    0.57 
   3  15  -2   -0.11    0.49 
   3 -15  -2    1.01    0.67 
   1 -15  -2  131.56    3.79 
  -1  15   2  134.65    3.92 
  -1 -15   2  126.87    3.80 
  -1 -15  -2   20.92    1.55 
   1  15   2   21.35    1.67 
   1 -15   2   22.66    1.70 
  -3 -15  -2    0.37    0.57 
   3 -15   2    1.00    0.70 
   3  15   2    1.28    0.71 
   5  15   2  166.29    4.48 
  -5 -15  -2  167.37    4.16 
   5 -15   2  176.04    4.70 
   7 -15   2    4.49    1.04 
  -7 -15  -2    3.30    0.81 
   7  15   2    2.20    0.84 
   9  15   2    3.72    0.97 
   9 -15   2    2.12    0.89 
  11 -15   2   62.31    2.90 
  11  15   2   63.56    2.81 
  13 -15   2    5.31    1.21 
  13  15   2    3.06    0.88 
  15  15   2    2.26    0.89 
  15 -15   2    3.30    0.96 
  17 -15   2   34.48    2.35 
  17  15   2   28.28    2.01 
  19 -15   2    4.65    1.23 
  19  15   2    6.43    1.22 
  21  15   2    3.78    1.14 
  21 -15   2    6.23    1.28 
  23  15   2   25.07    2.18 
  23 -15   2   28.30    2.34 
  25  15   2    0.93    0.97 
  25 -15   2    1.40    0.90 
  27 -15   2   -0.02    0.91 
  27  15   2   -1.10    0.68 
  29  15   2    8.60    1.56 
  29 -15   2    8.30    1.62 
  31 -15   2   -0.47    0.80 
  31  15   2   -0.47    0.75 
  33  15   2    5.17    1.37 
  33 -15   2    5.94    1.38 
  35  15   2    1.88    1.18 
  35 -15   2    0.71    1.10 
  36  16  -2   13.50    1.84 
  34 -16  -2   17.27    2.24 
  34  16  -2   17.95    2.02 
  32  16  -2    4.32    1.22 
  32 -16  -2    4.96    1.45 
  30 -16  -2   -0.27    1.04 
  30  16  -2    1.43    1.05 
  30  16  -2    2.64    1.05 
  28  16  -2    6.59    1.31 
  28 -16  -2    8.15    1.66 
  28  16  -2    8.01    1.40 
  26  16  -2    0.25    0.72 
  26 -16  -2    0.08    0.79 
  26  16  -2   -0.60    0.72 
  24 -16  -2    8.58    1.53 
  24  16  -2   10.29    1.55 
  24  16  -2    9.40    1.44 
  22  16  -2    8.39    1.35 
  22  16  -2    8.37    1.33 
  22 -16  -2    6.82    1.40 
  20  16  -2    8.67    1.29 
  20  16  -2    6.75    1.14 
  20 -16  -2    9.00    1.61 
  18 -16  -2    3.31    1.01 
  18  16  -2    3.54    0.93 
  18  16  -2    2.57    0.85 
  16  16  -2   45.13    2.29 
  16  16  -2   43.56    2.28 
  16 -16  -2   48.55    2.71 
  14 -16  -2    5.52    1.13 
  14  16  -2    3.37    0.91 
  14  16  -2    4.87    1.01 
  12  16  -2   14.61    1.53 
  12 -16  -2   16.65    1.76 
  12  16  -2   16.43    1.54 
  10  16  -2   27.90    1.87 
  10  16  -2   29.12    1.80 
  10 -16  -2   29.76    2.11 
  -8 -16   2   30.52    1.86 
   8 -16  -2   30.68    2.09 
   8  16  -2   30.63    1.85 
   8  16  -2   34.00    1.91 
   6  16  -2    7.58    1.14 
   6 -16  -2    6.47    1.15 
   6  16  -2    7.58    1.12 
  -6 -16   2    6.61    1.12 
   4 -16  -2  184.36    4.82 
   4  16  -2  179.38    4.50 
  -4 -16   2  184.07    4.71 
   2 -16  -2   17.05    1.67 
  -2 -16   2   14.68    1.59 
   0 -16   2    0.99    0.70 
   0 -16  -2   -0.96    0.50 
   0  16   2   -0.46    0.60 
   2  16   2   22.16    1.75 
   2 -16   2   23.29    1.82 
  -2 -16  -2   21.59    1.65 
   4 -16   2   23.00    1.77 
   4  16   2   19.94    1.72 
  -4 -16  -2   21.75    1.57 
   6 -16   2    6.02    1.18 
   6  16   2    7.45    1.22 
  -6 -16  -2    7.25    1.08 
   8  16   2  197.04    5.16 
   8 -16   2  188.63    5.18 
  10  16   2   17.36    1.76 
  10 -16   2   19.10    1.98 
  12  16   2    4.22    1.06 
  12 -16   2    3.55    1.07 
  14  16   2    1.56    0.75 
  14 -16   2    1.44    0.90 
  16 -16   2    5.54    1.26 
  16  16   2    7.36    1.29 
  18  16   2   -0.72    0.74 
  18 -16   2   -0.47    0.66 
  20  16   2  183.97    5.39 
  20 -16   2  181.18    5.47 
  22 -16   2   18.96    2.11 
  22  16   2   15.20    1.89 
  24 -16   2    3.98    1.31 
  24  16   2    2.98    1.01 
  26  16   2   23.20    2.33 
  26 -16   2   24.76    2.51 
  28 -16   2    4.18    1.32 
  28  16   2    3.63    1.22 
  30  16   2    0.03    0.93 
  30 -16   2   -0.39    0.86 
  32  16   2   68.49    3.63 
  32 -16   2   73.46    3.82 
  34 -16   2    4.35    2.15 
  34  16   2    7.55    1.88 
  35  17  -2    5.50    1.59 
  33 -17  -2    0.94    1.67 
  33  17  -2    1.16    0.93 
  31  17  -2    1.12    0.94 
  31 -17  -2    1.44    1.24 
  29 -17  -2    0.08    1.04 
  29  17  -2    1.11    0.91 
  27  17  -2    3.02    1.06 
  27 -17  -2    2.32    1.29 
  25  17  -2   91.26    3.57 
  25 -17  -2   85.28    4.01 
  25  17  -2   85.06    3.54 
  23  17  -2    6.60    1.26 
  23  17  -2    6.39    1.23 
  23 -17  -2    5.18    1.35 
  21  17  -2    9.60    1.41 
  21 -17  -2    7.10    1.49 
  21  17  -2    8.07    1.35 
  19  17  -2   -0.28    0.66 
  19  17  -2   -0.37    0.60 
  19 -17  -2   -0.86    0.79 
  17 -17  -2    0.21    0.90 
  17  17  -2   -0.59    0.59 
  17  17  -2   -0.19    0.57 
  15 -17  -2    9.23    1.65 
  15  17  -2    9.12    1.33 
  15  17  -2    8.19    1.28 
  13  17  -2  158.37    4.32 
  13  17  -2  164.20    4.51 
  13 -17  -2  161.98    5.00 
  11  17  -2    5.57    1.07 
  11 -17  -2    6.68    1.31 
  11  17  -2    3.73    0.94 
   9  17  -2    9.06    1.27 
   9  17  -2    8.34    1.20 
   9 -17  -2    8.15    1.42 
   7  17  -2   40.19    2.12 
   7 -17  -2   36.58    2.33 
  -7 -17   2   38.64    2.14 
   7  17  -2   37.51    2.08 
   5  17  -2    0.54    0.60 
   5 -17  -2    0.42    0.74 
  -5 -17   2    1.46    0.73 
  -3 -17   2   27.33    1.89 
   3 -17  -2   24.20    1.88 
  -1 -17   2  142.41    4.29 
   1 -17  -2  139.45    4.21 
   1 -17   2    1.60    0.86 
  -1 -17  -2    2.92    0.86 
   1  17   2    1.13    0.77 
   3 -17   2   11.32    1.52 
   3  17   2   11.64    1.41 
  -3 -17  -2   13.84    1.49 
  -5 -17  -2    9.38    1.25 
   5  17   2   10.15    1.43 
   5 -17   2    8.32    1.41 
   7  17   2    5.62    1.21 
   7 -17   2    6.13    1.28 
   9 -17   2    3.01    1.01 
   9  17   2    2.70    0.99 
  11  17   2  140.19    4.47 
  11 -17   2  153.38    4.84 
  13 -17   2   11.91    1.74 
  13  17   2    8.49    1.35 
  15  17   2   11.21    1.58 
  15 -17   2   13.10    1.77 
  17  17   2   35.14    2.44 
  17 -17   2   41.25    2.73 
  19 -17   2    5.34    1.34 
  19  17   2    3.91    1.27 
  21 -17   2    1.29    1.01 
  21  17   2    1.89    0.95 
  23 -17   2   25.77    2.61 
  23  17   2   23.75    2.38 
  25  17   2    0.69    0.77 
  25 -17   2    2.29    1.23 
  27 -17   2   13.26    2.06 
  27  17   2    9.99    1.66 
  29  17   2   22.58    2.41 
  29 -17   2   23.66    2.62 
  31  17   2    5.78    1.51 
  31 -17   2    5.30    1.64 
  30 -18  -2    7.18    2.40 
  28 -18  -2    7.03    1.63 
  26 -18  -2   13.48    2.03 
  26  18  -2   13.84    1.95 
  24  18  -2    3.53    1.14 
  24 -18  -2    6.65    1.70 
  22 -18  -2   42.88    2.98 
  22  18  -2   48.19    2.74 
  22  18  -2   45.61    2.60 
  20 -18  -2   20.15    2.36 
  20  18  -2   25.08    1.96 
  20  18  -2   21.59    2.06 
  18  18  -2    9.29    1.37 
  18  18  -2   10.25    1.51 
  18 -18  -2    9.89    1.72 
  16  18  -2    3.73    1.01 
  16  18  -2    4.32    1.03 
  16 -18  -2    3.71    1.24 
  14  18  -2    6.92    1.26 
  14 -18  -2    9.50    1.58 
  14  18  -2    7.68    1.23 
  12  18  -2   13.67    1.52 
  12 -18  -2   12.29    1.70 
  12  18  -2   13.07    1.50 
  10 -18  -2   82.17    3.58 
  10  18  -2   88.72    3.26 
  10  18  -2   83.01    3.18 
   8 -18  -2   16.17    1.82 
   8  18  -2   15.65    1.62 
   8  18  -2   19.14    1.76 
   6 -18  -2   31.80    2.29 
  -6 -18   2   32.02    2.09 
   6  18  -2   32.63    2.04 
  -4 -18   2   14.53    1.67 
   4 -18  -2   13.48    1.63 
  -2 -18   2    8.53    1.38 
   2 -18  -2    8.35    1.38 
   0 -18  -2   16.53    1.72 
   0 -18   2   13.22    1.59 
  -2 -18  -2   33.81    2.16 
   2  18   2   34.78    2.28 
   2 -18   2   38.26    2.43 
   4  18   2   26.42    2.02 
  -4 -18  -2   21.30    1.74 
   4 -18   2   27.41    2.13 
   6 -18   2   32.77    2.37 
   6  18   2   30.22    2.20 
   8  18   2   25.51    2.08 
   8 -18   2   27.13    2.22 
  10 -18   2    9.06    1.52 
  10  18   2    7.53    1.38 
  12 -18   2   21.90    2.25 
  12  18   2   19.21    2.05 
  14  18   2   42.26    2.64 
  14 -18   2   40.52    2.72 
  16  18   2    7.02    1.45 
  16 -18   2    6.74    1.44 
  18 -18   2   22.82    2.43 
  18  18   2   21.17    2.19 
  20  18   2   11.39    1.77 
  20 -18   2   10.79    1.89 
  22  18   2    1.42    0.91 
  22 -18   2    4.11    1.39 
  24  18   2   14.50    1.91 
  24 -18   2   13.34    1.99 
  26 -18   2   24.48    2.71 
  26  18   2   18.12    2.16 
  28 -18   2    1.41    1.17 
  28  18   2    0.43    1.07 
  30  18   2    6.15    1.55 
  27 -19  -2    5.16    2.30 
  25 -19  -2    3.86    1.38 
  23 -19  -2    6.43    1.60 
  21 -19  -2   -0.40    0.87 
  19 -19  -2   30.02    2.61 
  17  19  -2    9.00    1.48 
  17 -19  -2    7.53    1.56 
  15 -19  -2   -0.73    0.81 
  15  19  -2    0.42    0.81 
  13  19  -2   14.05    1.65 
  13 -19  -2   17.08    2.09 
  11 -19  -2    6.09    1.44 
  11  19  -2    8.08    1.33 
   9  19  -2   -0.13    0.66 
   9 -19  -2   -0.91    0.74 
   7 -19  -2   42.67    2.67 
  -5 -19   2   17.09    1.80 
   5 -19  -2   13.28    1.77 
  -3 -19   2    1.66    0.91 
   3 -19  -2    1.25    0.94 
   1 -19  -2   11.53    1.60 
  -1 -19   2   15.61    1.83 
   1 -19   2   28.24    2.19 
  -1 -19  -2   23.68    1.98 
   3 -19   2    0.05    0.77 
  -3 -19  -2    1.06    0.81 
   3  19   2   -0.12    0.81 
   5  19   2   33.76    2.33 
   5 -19   2   30.75    2.33 
   7 -19   2    4.37    1.16 
   7  19   2    3.16    1.05 
   9  19   2   -0.50    0.75 
   9 -19   2    1.62    1.08 
  11 -19   2    0.85    0.87 
  11  19   2    2.21    0.97 
  13 -19   2    6.41    1.43 
  13  19   2    4.56    1.27 
  15 -19   2    0.27    0.89 
  15  19   2   -0.41    0.77 
  17 -19   2   19.35    2.42 
  17  19   2   14.86    1.94 
  19 -19   2    0.59    0.93 
  19  19   2    1.24    0.91 
  21  19   2    0.45    0.96 
  21 -19   2   -1.59    0.71 
  23 -19   2    2.71    1.25 
  23  19   2    2.32    1.05 
  25  19   2    3.24    1.24 
  25 -19   2    4.43    1.64 
  27  19   2    0.81    1.06 
  22 -20  -2    5.75    1.53 
  20 -20  -2    0.39    1.10 
  18 -20  -2   -0.06    1.03 
  16 -20  -2   14.83    2.14 
  14  20  -2   -1.16    0.96 
  14 -20  -2    1.75    1.09 
  12 -20  -2   -0.75    0.83 
  12  20  -2   -0.54    0.69 
  10  20  -2    0.22    0.80 
  10 -20  -2    0.20    0.89 
   8 -20  -2    0.94    0.92 
   6 -20  -2    1.08    0.91 
   4 -20  -2   56.12    3.01 
  -4 -20   2   52.16    2.81 
  -2 -20   2    2.95    1.01 
   2 -20  -2    1.51    0.92 
   0 -20  -2    3.03    1.06 
   0 -20   2    4.50    1.20 
  -2 -20  -2   -0.51    0.65 
   2 -20   2    0.63    0.77 
   4 -20   2    4.81    1.21 
   4  20   2    2.70    1.07 
   6  20   2   -0.22    0.72 
   6 -20   2    1.45    1.03 
   8  20   2   66.57    3.27 
   8 -20   2   68.63    3.48 
  10 -20   2    7.31    1.55 
  10  20   2    3.20    1.14 
  12 -20   2   15.00    2.02 
  12  20   2   14.38    1.94 
  14 -20   2    8.96    1.70 
  14  20   2    8.72    1.54 
  16 -20   2   -0.77    0.86 
  16  20   2   -0.70    0.73 
  18  20   2    1.80    1.06 
  18 -20   2    1.66    1.12 
  20  20   2   55.53    3.23 
  20 -20   2   57.60    3.42 
  22  20   2    2.18    1.17 
  24  20   2   11.07    1.84 
  19 -21  -2   -1.73    0.79 
  17 -21  -2    7.61    1.67 
  15 -21  -2    5.76    1.45 
  13 -21  -2   78.66    3.91 
  11 -21  -2    1.54    1.16 
   9 -21  -2    4.82    1.37 
   7 -21  -2    0.80    0.92 
   5 -21  -2    0.90    0.97 
   3 -21  -2    2.73    1.04 
  -3 -21   2    4.91    1.87 
   1 -21  -2  114.69    4.27 
  -1 -21   2  119.09    4.38 
   1 -21   2    0.76    0.85 
   3 -21   2    8.94    1.63 
   5 -21   2    3.24    1.15 
   5  21   2    3.26    1.16 
   7 -21   2    3.74    1.22 
   7  21   2    5.12    1.25 
   9  21   2    5.78    1.33 
   9 -21   2    7.39    1.57 
  11 -21   2   60.28    3.45 
  11  21   2   60.51    3.30 
  13 -21   2    0.03    0.92 
  13  21   2   -0.35    0.83 
  15  21   2    6.23    1.44 
  15 -21   2    5.20    1.40 
  17 -21   2    4.72    1.34 
  17  21   2    1.84    1.07 
  19  21   2    0.40    0.98 
  21  21   2    0.07    1.01 
  14 -22  -2    2.08    1.19 
  12 -22  -2    1.21    0.92 
  10 -22  -2   24.03    2.51 
   8 -22  -2   16.25    2.16 
   6 -22  -2    9.70    1.72 
   4 -22  -2   31.70    2.53 
   2 -22  -2    6.03    1.43 
   0 -22   2    0.99    0.92 
   2 -22   2    5.06    1.35 
   4 -22   2   27.06    2.68 
   6 -22   2    2.52    1.23 
   8 -22   2   48.19    3.17 
   8  22   2   45.58    2.96 
  10 -22   2    4.70    1.29 
  10  22   2    6.10    1.44 
  12 -22   2    4.11    1.44 
  12  22   2    3.73    1.26 
  14  22   2    3.90    1.29 
  16  22   2    3.87    1.30 
  18  22   2    2.82    1.93 
   9 -23  -2    1.33    1.13 
   7 -23  -2    8.51    1.64 
   5 -23  -2    8.11    1.66 
   3 -23  -2    1.33    1.00 
   1 -23   2    4.21    1.28 
   3 -23   2    7.05    1.44 
   5 -23   2    4.17    1.14 
   7 -23   2    2.62    1.16 
   9 -23   2    0.92    1.57 
   9  23   2    1.54    1.14 
  11  23   2    3.15    1.26 
   2 -24   2    1.75    1.37 
  48   0  -3   -0.73    0.87 
  46   0  -3   -0.86    0.74 
  44   0  -3   -0.67    0.86 
  42   0  -3    1.48    1.02 
  40   0  -3    0.00    0.71 
  38   0  -3    0.16    0.68 
  36   0  -3    1.40    0.77 
  34   0  -3    0.42    0.59 
  32   0  -3   -0.39    0.57 
  30   0  -3   -0.08    0.46 
  28   0  -3    0.29    0.45 
  28   0  -3    0.24    0.32 
  26   0  -3    0.73    0.50 
  26   0  -3   -0.28    0.32 
  24   0  -3    0.18    0.32 
  24   0  -3    0.13    0.49 
  22   0  -3   -0.12    0.23 
  22   0  -3   -0.10    0.33 
  20   0  -3   -0.35    0.24 
  20   0  -3    0.25    0.34 
 -18   0   3   -0.13    0.28 
  18   0  -3   -0.57    0.27 
  16   0  -3   -0.05    0.22 
 -16   0   3    0.09    0.22 
 -14   0   3   -0.10    0.19 
 -12   0   3   -1.56    0.22 
 -10   0   3    0.35    0.20 
  -8   0   3   -0.04    0.17 
  -6   0   3   -3.50    0.20 
   6   0  -3   -3.68    0.18 
   4   0  -3    0.04    0.13 
  -4   0   3    0.07    0.16 
  -2   0   3    0.06    0.14 
   2   0  -3    0.07    0.11 
  -2   0   3    0.10    0.09 
   0   0   3   -3.26    0.23 
   0   0   3   -2.88    0.21 
   2   0   3    0.14    0.14 
   2   0   3   -0.10    0.14 
   4   0   3   -0.05    0.17 
   4   0   3    0.18    0.18 
   6   0   3   -2.87    0.25 
   6   0   3   -3.01    0.24 
   8   0   3    0.08    0.25 
   8   0   3    0.01    0.18 
  10   0   3    0.12    0.21 
  10   0   3    0.02    0.24 
  12   0   3    2.33    0.57 
  12   0   3    0.07    0.30 
  14   0   3   -0.17    0.20 
  14   0   3    0.16    0.28 
  16   0   3   -0.43    0.23 
  16   0   3    0.05    0.28 
  18   0   3    0.44    0.45 
  18   0   3    0.47    0.30 
  20   0   3   -0.24    0.34 
  20   0   3    0.76    0.31 
  22   0   3   -0.19    0.29 
  22   0   3   -0.27    0.33 
  24   0   3    1.47    0.41 
  24   0   3    1.19    0.65 
  26   0   3    0.24    0.53 
  28   0   3    0.23    0.52 
  30   0   3    0.02    0.62 
  32   0   3   -0.30    0.66 
  34   0   3    0.46    0.70 
  36   0   3    0.90    0.79 
  38   0   3    1.59    0.93 
  40   0   3   -0.59    0.69 
  42   0   3    1.54    0.89 
  44   0   3   -1.22    0.88 
  47   1  -3    4.07    1.34 
  47  -1  -3    4.04    1.33 
  45  -1  -3   27.74    2.47 
  45   1  -3   23.76    2.46 
  43   1  -3    3.64    1.28 
  43  -1  -3    1.70    1.08 
  41  -1  -3    0.11    0.62 
  41   1  -3   -0.33    0.68 
  39  -1  -3    1.64    0.90 
  39   1  -3    0.54    0.77 
  37  -1  -3   16.65    1.81 
  37   1  -3   16.60    1.80 
  35  -1  -3    5.64    1.16 
  35   1  -3    8.29    1.25 
  33   1  -3  111.15    3.69 
  33  -1  -3  109.67    3.67 
  31  -1  -3    0.12    0.59 
  31   1  -3    1.17    0.66 
  29   1  -3    0.46    0.53 
  29  -1  -3    1.45    0.63 
  29  -1  -3   -0.09    0.43 
  27  -1  -3   72.46    2.03 
  27  -1  -3   74.08    2.65 
  27   1  -3   72.80    1.81 
  27   1  -3   75.60    2.62 
  25  -1  -3    5.77    0.84 
  25  -1  -3    7.78    0.79 
  25   1  -3    7.20    0.64 
  25   1  -3    7.74    0.99 
  23  -1  -3    4.71    0.78 
  23   1  -3    4.40    0.50 
  23  -1  -3    4.43    0.58 
  23   1  -3    4.72    0.76 
  21  -1  -3   97.47    2.22 
  21   1  -3   92.86    1.98 
  21   1  -3   98.02    2.63 
  21  -1  -3   96.52    2.68 
 -19  -1   3   11.81    0.64 
  19  -1  -3   10.93    0.88 
  19   1  -3   12.73    0.92 
  19  -1  -3   12.48    0.78 
 -17  -1   3   51.69    1.29 
  17   1  -3   52.72    1.67 
 -15  -1   3  157.72    2.67 
  15   1  -3  162.50    3.11 
 -15   1   3  159.23    2.88 
  13   1  -3    1.25    0.32 
 -13  -1   3    1.37    0.28 
 -13   1   3    1.96    0.34 
 -11   1   3   23.42    0.86 
 -11  -1   3   23.20    0.76 
  11   1  -3   21.15    0.81 
  -9   1   3   62.11    1.43 
  -9  -1   3   65.06    1.36 
   9   1  -3   63.38    1.34 
   7   1  -3   -0.05    0.18 
  -7  -1   3    0.18    0.16 
   7   1  -3    0.08    0.13 
  -7   1   3    0.23    0.20 
   5   1  -3   22.63    0.71 
  -5   1   3   20.93    0.73 
  -5  -1   3   22.78    0.73 
  -3   1   3  740.18    9.57 
   3   1  -3  751.73    9.32 
   3  -1  -3  759.23    9.04 
  -3  -1   3  759.67    9.65 
  -3   1   3  734.69    9.64 
  -1  -1   3   99.41    1.39 
   1   1  -3   98.37    1.68 
  -1   1   3   97.94    1.75 
  -1   1   3   93.86    1.63 
   1  -1   3   21.93    0.58 
   1  -1   3   22.87    0.76 
   1   1   3   22.29    0.70 
   3  -1   3   27.68    0.79 
   3   1   3   29.07    0.81 
   3   1   3   28.74    0.89 
   3  -1   3   27.61    0.86 
   5  -1   3    0.75    0.22 
   5  -1   3    0.75    0.23 
   5   1   3    0.83    0.26 
   5   1   3    0.79    0.21 
   7  -1   3   14.65    0.70 
   7  -1   3   14.74    0.69 
   7   1   3   15.30    0.76 
   7   1   3   15.57    0.59 
   9   1   3  363.11    5.01 
   9  -1   3  367.46    5.61 
   9  -1   3  359.84    5.29 
   9   1   3  354.17    5.65 
  11  -1   3    1.25    0.33 
  11   1   3    1.75    0.40 
  11   1   3    1.15    0.26 
  11  -1   3    1.67    0.37 
  13   1   3   86.56    2.35 
  13  -1   3   84.10    2.25 
  13   1   3   86.09    1.71 
  13  -1   3   85.55    1.93 
  15   1   3    4.23    0.64 
  15   1   3    4.77    0.46 
  15  -1   3    3.17    0.59 
  15  -1   3    3.15    0.46 
  17  -1   3    2.03    0.46 
  17   1   3    1.90    0.50 
  17  -1   3    1.08    0.45 
  17   1   3    1.76    0.34 
  19  -1   3    2.66    0.65 
  19   1   3    2.66    0.38 
  19   1   3    3.22    0.64 
  19  -1   3    2.77    0.48 
  21  -1   3  422.15    6.44 
  21   1   3  419.72    7.60 
  21   1   3  416.43    6.01 
  21  -1   3  419.72    7.54 
  23  -1   3    5.53    0.68 
  23   1   3    4.64    0.84 
  23  -1   3    5.13    0.90 
  23   1   3    5.99    0.57 
  25   1   3   22.13    1.61 
  25  -1   3   20.53    1.55 
  25  -1   3   21.74    1.18 
  27  -1   3    0.72    0.54 
  27   1   3    0.62    0.57 
  27  -1   3    2.51    0.85 
  29  -1   3    1.31    0.66 
  29   1   3    0.04    0.60 
  31   1   3    5.92    1.12 
  31  -1   3    6.82    1.23 
  33   1   3  102.52    3.86 
  33  -1   3   96.89    3.75 
  35  -1   3    1.85    0.92 
  35   1   3    3.10    1.02 
  37   1   3   13.77    1.92 
  37  -1   3   11.82    1.73 
  39  -1   3    1.71    1.06 
  39   1   3    2.48    1.13 
  41  -1   3   -0.18    0.69 
  41   1   3    0.45    0.90 
  43  -1   3    2.85    1.29 
  43   1   3    3.87    1.34 
  48   2  -3   76.16    4.06 
  46  -2  -3    0.31    0.87 
  46   2  -3   -0.31    0.79 
  44   2  -3   23.71    2.44 
  44  -2  -3   23.45    2.40 
  42  -2  -3   12.39    1.83 
  42   2  -3   10.58    1.64 
  40   2  -3    3.63    1.11 
  40  -2  -3    4.53    1.15 
  38  -2  -3    8.44    1.41 
  38   2  -3    7.91    1.38 
  36  -2  -3  299.46    7.01 
  36   2  -3  303.51    6.99 
  34  -2  -3   -0.44    0.51 
  34   2  -3   -0.69    0.48 
  32  -2  -3   47.47    2.43 
  32   2  -3   47.33    2.32 
  30  -2  -3   80.40    2.98 
  30  -2  -3   85.56    2.45 
  30   2  -3   85.25    3.02 
  28   2  -3   22.12    1.50 
  28  -2  -3   20.64    1.49 
  28  -2  -3   20.97    1.19 
  26   2  -3    0.32    0.28 
  26  -2  -3   -0.23    0.38 
  26  -2  -3    0.19    0.44 
  26   2  -3    0.70    0.53 
  24  -2  -3  982.72   13.53 
  24  -2  -3 1012.30   14.66 
  24   2  -3  995.96   14.44 
  24   2  -3  971.52   12.77 
  22   2  -3    5.71    0.77 
  22   2  -3    5.70    0.50 
  22  -2  -3    6.44    0.69 
  20  -2  -3   57.06    1.69 
 -20  -2   3   57.33    1.33 
  20   2  -3   56.32    1.89 
  18   2  -3  362.53    5.95 
  18  -2  -3  358.32    5.63 
 -18  -2   3  358.07    5.08 
 -16  -2   3  104.38    1.91 
  16   2  -3  103.04    2.38 
 -14   2   3   12.66    0.73 
 -14  -2   3   11.93    0.56 
  14   2  -3   12.01    0.74 
 -12   2   3 4056.80   52.86 
  12   2  -3 4123.34   54.83 
 -12  -2   3 4130.64   51.98 
 -10  -2   3    0.81    0.23 
 -10   2   3    0.84    0.28 
  10   2  -3    1.07    0.24 
  -8   2   3   36.03    1.06 
   8   2  -3   35.77    1.06 
   8   2  -3   35.26    0.88 
  -8  -2   3   35.44    0.93 
   6   2  -3  254.86    3.48 
   6   2  -3  258.16    3.80 
  -6   2   3  256.54    3.90 
  -6  -2   3  249.25    3.75 
  -4   2   3    0.73    0.22 
  -4   2   3    0.87    0.25 
  -4  -2   3    0.95    0.24 
   4   2  -3    1.21    0.26 
   4   2  -3    0.77    0.10 
   2  -2  -3    0.03    0.08 
  -2   2   3   -0.06    0.19 
  -2   2   3   -0.55    0.19 
  -2  -2   3    0.11    0.19 
   2   2  -3    0.02    0.20 
   0  -2   3 6290.28   83.19 
   0   2   3 6698.83   82.73 
   0   2  -3 6574.42   80.82 
   0   2   3 6657.49   84.26 
   2   2   3    0.03    0.15 
   2  -2   3    0.15    0.20 
   2  -2   3    0.05    0.13 
   2   2   3   -0.09    0.17 
   4  -2   3   40.08    1.03 
   4   2   3   41.24    0.98 
   4   2   3   42.58    1.21 
   6   2   3   63.29    1.65 
   6   2   3   59.43    1.26 
   6  -2   3   58.50    1.47 
   6  -2   3   59.68    1.54 
   8   2   3   12.35    0.52 
   8   2   3   12.37    0.78 
   8  -2   3   13.44    0.73 
   8  -2   3   12.04    0.69 
  10   2   3    4.69    0.56 
  10   2   3    5.50    0.38 
  10  -2   3    5.42    0.57 
  10  -2   3    6.52    0.57 
  12   2   3 3005.55   38.21 
  12   2   3 2995.72   38.35 
  12  -2   3 3028.73   38.11 
  12  -2   3 3016.18   39.52 
  14   2   3    1.99    0.48 
  14  -2   3    2.07    0.43 
  14   2   3    1.92    0.28 
  14  -2   3    1.85    0.49 
  16  -2   3    1.39    0.46 
  16   2   3    1.97    0.53 
  16  -2   3    1.16    0.38 
  16   2   3    1.19    0.26 
  18  -2   3  165.28    3.81 
  18  -2   3  164.01    3.26 
  18   2   3  162.13    2.64 
  18   2   3  161.58    3.83 
  20   2   3   50.88    2.13 
  20  -2   3   56.51    1.75 
  20   2   3   52.66    1.25 
  20  -2   3   55.66    2.16 
  22   2   3    2.12    0.33 
  22   2   3    2.17    0.65 
  22  -2   3    1.27    0.47 
  22  -2   3    2.03    0.62 
  24   2   3  918.25   14.15 
  24  -2   3  920.42   12.64 
  24  -2   3  876.26   13.98 
  26  -2   3    6.63    1.10 
  26   2   3    9.02    1.18 
  26  -2   3    8.84    0.89 
  28  -2   3   16.64    1.14 
  28   2   3   12.19    1.41 
  28  -2   3   15.81    1.64 
  30   2   3   74.11    3.09 
  30  -2   3   71.04    3.01 
  32   2   3   32.27    2.26 
  32  -2   3   30.76    2.13 
  34  -2   3   11.57    1.64 
  34   2   3   12.76    1.67 
  36  -2   3  142.38    4.89 
  36   2   3  141.44    4.91 
  38   2   3    7.71    1.49 
  38  -2   3    9.25    1.55 
  40  -2   3    0.28    0.79 
  40   2   3    0.56    0.79 
  42   2   3    0.07    0.80 
  42  -2   3    0.56    0.97 
  44  -2   3   17.18    2.36 
  44   2   3   14.57    2.09 
  47   3  -3    4.28    1.24 
  47  -3  -3    4.03    1.28 
  45  -3  -3   72.64    3.76 
  45   3  -3   71.87    3.66 
  43  -3  -3    0.71    0.84 
  43   3  -3   -0.14    0.90 
  41  -3  -3    0.51    0.91 
  41   3  -3    1.20    0.91 
  39  -3  -3    0.19    0.79 
  39   3  -3    0.99    0.74 
  37  -3  -3   30.53    2.24 
  37   3  -3   34.02    2.26 
  35   3  -3    7.83    1.22 
  35  -3  -3    8.12    1.35 
  33  -3  -3  212.87    5.45 
  33   3  -3  211.53    5.34 
  31  -3  -3   25.32    1.46 
  31   3  -3   27.43    1.85 
  31  -3  -3   28.18    1.91 
  29   3  -3   13.21    1.39 
  29  -3  -3   15.64    1.38 
  29  -3  -3   12.43    1.07 
  27  -3  -3    2.19    0.67 
  27  -3  -3    3.55    0.65 
  27   3  -3    0.95    0.53 
  25  -3  -3   31.43    1.43 
  25   3  -3   28.86    1.60 
  23  -3  -3   47.43    1.71 
  23   3  -3   50.35    1.95 
  23   3  -3   48.16    1.17 
  21  -3  -3  438.08    6.84 
  21   3  -3  432.46    7.20 
 -21  -3   3  434.00    5.90 
 -19  -3   3    0.14    0.19 
  19  -3  -3    0.93    0.38 
  19   3  -3   -0.03    0.30 
 -17  -3   3    5.79    0.41 
  17   3  -3    4.33    0.58 
  17  -3  -3    6.06    0.64 
  15  -3  -3  224.22    3.94 
 -15  -3   3  220.45    3.32 
  15   3  -3  223.52    3.94 
 -13   3   3   17.48    0.88 
  13   3  -3   16.58    0.80 
 -13  -3   3   15.08    0.62 
  11   3  -3   41.41    1.31 
  11   3  -3   40.77    1.18 
 -11   3   3   38.26    1.26 
 -11  -3   3   42.74    1.03 
   9   3  -3  571.71    7.82 
  -9  -3   3  588.05    7.73 
   9   3  -3  590.68    7.95 
  -9   3   3  589.38    8.12 
  -7   3   3   15.18    0.73 
  -7  -3   3   14.34    0.62 
   7   3  -3   13.41    0.51 
  -5  -3   3    1.11    0.26 
   5   3  -3    1.34    0.18 
   5   3  -3    0.97    0.24 
  -5   3   3    1.35    0.30 
  -3   3   3   14.44    0.67 
  -3   3   3   14.27    0.67 
   3   3  -3   16.50    0.41 
  -3  -3   3   16.31    0.71 
   3   3  -3   14.73    0.68 
  -1   3   3    3.53    0.38 
  -1   3   3    3.25    0.38 
  -1  -3   3    4.05    0.44 
   1   3  -3    4.02    0.40 
   1   3   3   12.13    0.57 
   1   3   3   12.57    0.66 
   1  -3   3   12.61    0.69 
   3   3   3    0.58    0.30 
   3  -3   3    1.09    0.32 
   3   3   3    0.38    0.21 
   5   3   3    0.62    0.20 
   5   3   3    0.56    0.28 
   5  -3   3    0.07    0.21 
   7   3   3    4.50    0.36 
   7  -3   3    5.20    0.58 
   7   3   3    3.95    0.51 
   9   3   3  531.82    6.85 
   9  -3   3  519.19    7.54 
   9   3   3  519.26    7.84 
  11  -3   3    4.05    0.55 
  11   3   3    4.31    0.37 
  11  -3   3    3.89    0.54 
  11   3   3    4.40    0.63 
  13   3   3   22.80    0.66 
  13  -3   3   22.16    1.07 
  13  -3   3   23.07    1.17 
  15   3   3   23.20    1.26 
  15  -3   3   22.85    1.11 
  15   3   3   23.20    0.67 
  15  -3   3   23.40    1.25 
  17  -3   3   24.86    1.21 
  17   3   3   25.74    1.43 
  17   3   3   24.08    0.69 
  17  -3   3   24.50    1.32 
  19  -3   3    7.61    0.97 
  19  -3   3    6.61    0.76 
  19   3   3    8.30    1.03 
  19   3   3    7.39    0.41 
  21   3   3  481.34    8.35 
  21  -3   3  463.35    7.36 
  21   3   3  463.85    6.12 
  21  -3   3  460.96    8.16 
  23  -3   3   33.77    1.50 
  23  -3   3   31.46    1.79 
  23   3   3   30.39    1.78 
  25  -3   3   42.27    2.16 
  25   3   3   44.16    2.20 
  25  -3   3   41.43    1.73 
  27  -3   3    0.41    0.46 
  27   3   3    0.53    0.59 
  27  -3   3    0.75    0.62 
  29  -3   3    2.13    0.84 
  29  -3   3    2.52    0.65 
  29   3   3    1.32    0.79 
  31   3   3   -0.15    0.67 
  31  -3   3   -0.21    0.66 
  33   3   3  196.16    5.56 
  33  -3   3  189.24    5.44 
  35  -3   3    8.85    1.45 
  35   3   3    7.35    1.43 
  37   3   3    6.64    1.40 
  37  -3   3    5.67    1.36 
  39   3   3    5.17    1.35 
  39  -3   3    4.25    1.28 
  41   3   3    1.94    1.17 
  41  -3   3    0.23    0.83 
  43  -3   3    2.95    1.21 
  43   3   3    1.86    1.14 
  48   4  -3   16.42    2.51 
  46   4  -3    0.55    0.86 
  46  -4  -3    0.17    0.89 
  44   4  -3    9.08    1.59 
  44  -4  -3   11.69    1.96 
  42  -4  -3   11.21    1.78 
  42   4  -3   10.66    1.68 
  40   4  -3    0.34    0.73 
  40  -4  -3    2.01    0.95 
  38   4  -3    1.77    0.85 
  38  -4  -3    1.96    1.03 
  36  -4  -3   64.26    3.04 
  36   4  -3   67.85    3.06 
  34   4  -3    0.30    0.57 
  34  -4  -3    0.07    0.62 
  32   4  -3   18.46    1.61 
  32  -4  -3   19.99    1.69 
  32  -4  -3   19.95    1.42 
  30  -4  -3   68.56    2.81 
  30   4  -3   67.56    2.69 
  30  -4  -3   70.70    2.45 
  28   4  -3    1.80    0.67 
  28  -4  -3    2.02    0.61 
  26  -4  -3    8.35    0.97 
  26   4  -3    9.76    1.08 
  24   4  -3  245.13    5.04 
  24  -4  -3  248.06    4.76 
  22   4  -3    0.97    0.47 
  22  -4  -3    1.21    0.45 
  20  -4  -3    8.19    0.85 
  20   4  -3    8.36    0.86 
 -20  -4   3    7.65    0.43 
  18  -4  -3  279.88    4.90 
  18   4  -3  279.66    4.95 
 -18  -4   3  275.59    3.94 
  16  -4  -3    0.15    0.28 
 -16  -4   3    0.07    0.16 
  16   4  -3    0.09    0.28 
  14   4  -3    9.92    0.80 
  14   4  -3   10.98    0.73 
  14  -4  -3    9.02    0.76 
 -14  -4   3    9.92    0.50 
  12   4  -3  733.32    9.97 
  12  -4  -3  736.14   10.16 
 -12  -4   3  723.71    9.46 
  12   4  -3  725.51    9.98 
  10   4  -3    7.80    0.63 
  10   4  -3    9.15    0.57 
 -10   4   3    7.86    0.66 
 -10  -4   3    8.28    0.50 
  -8   4   3   28.25    1.08 
   8   4  -3   28.55    1.03 
   8   4  -3   27.14    0.84 
  -8  -4   3   28.84    0.92 
   6   4  -3  167.79    2.57 
  -6  -4   3  165.40    2.83 
  -6   4   3  164.77    2.98 
   4   4  -3   15.73    0.51 
  -4   4   3   15.32    0.73 
  -4  -4   3   15.07    0.72 
  -4   4   3   15.66    0.73 
   4   4  -3   15.03    0.71 
  -2   4   3   11.76    0.63 
  -2   4   3   10.25    0.61 
   2   4  -3   10.58    0.63 
  -2  -4   3   10.50    0.63 
   0   4   3  736.80    8.66 
   0   4  -3  721.85    9.57 
   0   4   3  725.87    9.95 
   0   4   3  730.59    9.62 
   2   4   3    5.63    0.46 
   2  -4   3    4.65    0.52 
   2   4   3    4.22    0.48 
   4  -4   3    0.62    0.33 
   4   4   3    0.68    0.31 
   4   4   3    0.78    0.23 
   6   4   3  380.55    6.02 
   6   4   3  377.98    5.25 
   6  -4   3  388.79    5.91 
   8   4   3    0.22    0.31 
   8  -4   3    0.31    0.28 
   8   4   3   -0.07    0.15 
  10   4   3    2.26    0.28 
  10  -4   3    2.37    0.49 
  10   4   3    1.98    0.50 
  12  -4   3  720.17   10.21 
  12   4   3  703.13    9.09 
  12   4   3  731.77   10.68 
  14  -4   3   16.35    1.01 
  14   4   3   17.48    0.55 
  14   4   3   17.77    1.17 
  16   4   3   -0.06    0.12 
  16  -4   3    0.00    0.34 
  16   4   3   -0.38    0.33 
  16  -4   3    0.04    0.30 
  18   4   3  155.60    2.23 
  18   4   3  166.29    3.97 
  18  -4   3  163.19    3.82 
  18  -4   3  156.37    3.45 
  20  -4   3    1.13    0.59 
  20   4   3    0.84    0.51 
  20  -4   3    1.11    0.48 
  22   4   3    0.58    0.52 
  22  -4   3    0.33    0.49 
  22  -4   3    0.52    0.47 
  24  -4   3  137.67    3.31 
  24   4   3  127.83    3.80 
  24  -4   3  125.87    3.72 
  26   4   3    1.10    0.67 
  26  -4   3    1.12    0.54 
  26  -4   3    1.42    0.69 
  28  -4   3   -0.34    0.48 
  28   4   3    0.11    0.58 
  28  -4   3   -0.01    0.55 
  30   4   3   37.82    2.28 
  30  -4   3   38.65    1.83 
  30  -4   3   41.23    2.37 
  32   4   3   11.91    1.61 
  32  -4   3   12.43    1.62 
  34   4   3    0.60    0.72 
  34  -4   3   -0.40    0.62 
  36   4   3   49.25    2.95 
  36  -4   3   46.76    2.85 
  38  -4   3    5.30    1.34 
  38   4   3    9.19    1.59 
  40   4   3   -0.48    0.72 
  40  -4   3   -0.17    0.72 
  42  -4   3    6.70    1.49 
  42   4   3    7.93    1.72 
  47   5  -3   -0.93    0.82 
  45  -5  -3   -0.82    0.90 
  45   5  -3    0.77    0.89 
  43   5  -3   -0.74    0.71 
  43  -5  -3   -0.07    0.86 
  41   5  -3    3.81    1.16 
  41  -5  -3    5.84    1.33 
  39   5  -3   17.55    1.88 
  39  -5  -3   16.48    2.02 
  37  -5  -3   18.57    2.03 
  37   5  -3   24.59    2.02 
  35   5  -3   -0.15    0.59 
  35  -5  -3    0.17    0.70 
  33  -5  -3   11.79    1.51 
  33   5  -3   17.47    1.71 
  33  -5  -3   11.50    1.25 
  31   5  -3    4.48    0.95 
  31  -5  -3    3.75    0.85 
  31  -5  -3    3.69    0.97 
  29  -5  -3   18.31    1.44 
  29   5  -3   22.45    1.61 
  27   5  -3   26.24    1.60 
  27  -5  -3   24.79    1.47 
  25  -5  -3   13.62    1.17 
  25   5  -3   14.44    1.22 
  23   5  -3    0.94    0.47 
  23  -5  -3    1.68    0.53 
  21   5  -3    2.81    0.58 
  21  -5  -3    4.29    0.67 
  19   5  -3    3.96    0.62 
 -19  -5   3    3.85    0.33 
  19  -5  -3    2.43    0.59 
  17   5  -3    4.15    0.67 
  17  -5  -3    3.53    0.67 
  17   5  -3    4.23    0.61 
 -17  -5   3    3.99    0.35 
  15   5  -3  194.79    3.65 
  15  -5  -3  193.98    3.82 
  15   5  -3  196.30    3.80 
 -15  -5   3  191.31    3.00 
  13   5  -3   71.85    1.96 
  13  -5  -3   70.96    2.00 
 -13  -5   3   68.70    1.48 
  13   5  -3   70.08    1.81 
 -11  -5   3   27.47    0.91 
  11   5  -3   29.74    1.19 
  11   5  -3   29.74    1.06 
  11  -5  -3   29.21    1.25 
   9   5  -3  271.82    4.17 
  -9  -5   3  267.66    4.12 
   9  -5  -3  268.84    4.55 
   7   5  -3   53.60    1.50 
   7   5  -3   53.23    1.25 
  -7   5   3   50.16    1.51 
  -7  -5   3   53.40    1.39 
  -5   5   3   18.97    0.91 
   5   5  -3   19.99    0.90 
   5   5  -3   20.09    0.69 
  -5  -5   3   19.48    0.87 
  -5   5   3   17.79    0.87 
  -3   5   3   21.69    0.93 
  -3   5   3   21.21    0.94 
  -3  -5   3   21.87    0.95 
   3   5  -3   22.42    0.94 
   3   5  -3   21.83    0.71 
  -1   5   3   29.84    1.03 
  -1   5   3   28.70    1.10 
  -1  -5   3   27.58    1.09 
   1   5  -3   30.97    1.10 
   1   5   3    3.33    0.47 
   1  -5   3    3.69    0.49 
   1   5   3    4.08    0.25 
   1   5   3    4.86    0.49 
   3  -5   3   52.93    1.60 
   3   5   3   57.18    1.38 
   3   5   3   57.15    1.64 
   5   5   3   31.12    0.95 
   5   5   3   33.34    1.28 
   5  -5   3   33.09    1.28 
   7   5   3   39.73    1.46 
   7   5   3   38.53    1.02 
   7  -5   3   39.59    1.43 
   9   5   3   93.66    2.46 
   9   5   3   94.07    1.71 
   9  -5   3   91.82    2.33 
  11   5   3   29.37    0.80 
  11  -5   3   31.42    1.35 
  11   5   3   28.75    1.40 
  13   5   3   51.42    1.89 
  13   5   3   50.50    1.03 
  13  -5   3   52.09    1.77 
  15  -5   3  217.08    4.30 
  15   5   3  227.50    4.67 
  15   5   3  218.80    3.02 
  17   5   3   21.74    1.42 
  17  -5   3   21.75    1.27 
  19  -5   3   -0.80    0.39 
  19  -5   3    1.07    0.50 
  19   5   3    1.09    0.57 
  21  -5   3   24.19    1.57 
  21  -5   3   24.42    1.39 
  21   5   3   27.24    1.69 
  23  -5   3   -0.55    0.34 
  23   5   3   -0.10    0.53 
  23  -5   3   -0.28    0.42 
  25   5   3   13.99    1.52 
  25  -5   3   12.43    1.22 
  25  -5   3   13.05    1.42 
  27  -5   3   27.08    1.86 
  27   5   3   23.90    1.75 
  27  -5   3   24.70    1.52 
  29  -5   3    9.71    1.36 
  29   5   3    6.91    1.21 
  29  -5   3    8.56    1.11 
  31  -5   3    2.49    0.90 
  31   5   3    1.15    0.74 
  31  -5   3    0.99    0.72 
  33   5   3    0.20    0.70 
  33  -5   3    0.10    0.68 
  35   5   3   -0.12    0.68 
  35  -5   3   -0.23    0.69 
  37  -5   3    7.92    1.55 
  37   5   3    6.22    1.42 
  39  -5   3    9.59    1.69 
  39   5   3   12.54    1.83 
  41  -5   3    1.25    0.91 
  41   5   3    1.18    0.98 
  43   5   3    0.55    0.99 
  43  -5   3   -0.25    0.64 
  46   6  -3    0.49    0.94 
  44   6  -3   11.56    1.87 
  44  -6  -3   12.54    2.02 
  42  -6  -3   -1.18    0.65 
  42   6  -3    0.98    0.95 
  40  -6  -3    3.57    1.17 
  40   6  -3    1.33    0.91 
  38   6  -3   -0.33    0.74 
  38  -6  -3    0.12    0.72 
  36  -6  -3  135.41    4.60 
  36   6  -3  141.38    4.49 
  34   6  -3    6.74    1.17 
  34  -6  -3    8.18    1.40 
  34  -6  -3    7.99    1.12 
  32  -6  -3   19.59    1.52 
  32   6  -3   17.74    1.55 
  30   6  -3   19.39    1.56 
  30  -6  -3   14.60    1.40 
  28  -6  -3   13.96    1.32 
  28   6  -3   11.42    1.25 
  26  -6  -3    0.27    0.51 
  26   6  -3    0.17    0.44 
  24   6  -3  323.73    6.15 
  24  -6  -3  315.77    5.98 
  22  -6  -3    2.93    0.66 
  22   6  -3    1.10    0.48 
  20   6  -3    5.30    0.74 
  20   6  -3    7.36    0.94 
  20  -6  -3    4.48    0.73 
  18   6  -3   59.01    1.92 
  18  -6  -3   62.70    2.08 
 -18  -6   3   55.77    1.21 
  18   6  -3   56.02    1.97 
 -16  -6   3   19.49    0.71 
  16   6  -3   20.21    1.18 
  16   6  -3   20.22    1.08 
  16  -6  -3   20.38    1.21 
  14   6  -3    0.26    0.36 
  14  -6  -3   -0.02    0.40 
  14   6  -3   -0.08    0.30 
 -14  -6   3   -0.03    0.19 
 -12  -6   3 2163.39   28.27 
  12  -6  -3 2252.21   28.54 
  12   6  -3 2260.05   27.77 
  12   6  -3 2258.88   28.47 
  10  -6  -3    1.08    0.40 
  10   6  -3    1.19    0.33 
  10   6  -3    1.44    0.40 
 -10  -6   3    1.26    0.31 
  -8  -6   3    2.67    0.41 
   8   6  -3    2.63    0.45 
   8  -6  -3    2.75    0.52 
   8   6  -3    3.10    0.40 
   6  -6  -3  121.85    2.66 
  -6  -6   3  121.10    2.51 
   6   6  -3  123.42    2.27 
   6   6  -3  123.77    2.56 
  -4  -6   3    0.38    0.27 
   4  -6  -3   -0.13    0.25 
  -4   6   3    0.32    0.28 
   4   6  -3    0.75    0.24 
   4   6  -3    0.50    0.29 
  -2   6   3    0.45    0.30 
   2   6  -3    1.60    0.40 
  -2  -6   3    1.29    0.37 
   2   6  -3    0.98    0.26 
   0  -6   3  596.12    8.78 
   0   6   3  623.35    8.55 
   0   6  -3  610.51    8.54 
   0   6   3  631.85    7.63 
   0   6   3  618.43    8.94 
   2   6   3    4.63    0.59 
   2  -6   3    4.16    0.56 
   2   6   3    3.97    0.31 
   2   6   3    3.53    0.45 
   4   6   3    0.49    0.33 
   4  -6   3    0.65    0.37 
   4   6   3    0.97    0.30 
   4   6   3    0.96    0.22 
   6  -6   3   36.23    1.42 
   6   6   3   40.29    1.12 
   6   6   3   40.60    1.51 
   8   6   3    7.35    0.50 
   8  -6   3    6.51    0.75 
   8   6   3    5.93    0.72 
  10   6   3    0.99    0.27 
  10   6   3    1.53    0.48 
  10  -6   3    0.62    0.38 
  12  -6   3 1273.93   17.70 
  12   6   3 1357.35   18.29 
  14   6   3    2.73    0.63 
 -14  -6  -3    2.75    0.28 
  14  -6   3    2.34    0.60 
  16  -6   3    0.18    0.43 
  16   6   3    1.19    0.55 
  18  -6   3    7.53    0.92 
  18   6   3    6.92    0.95 
  20   6   3    8.03    1.08 
  20  -6   3    7.68    0.99 
  22  -6   3   10.11    1.24 
  22  -6   3   10.02    1.13 
  22   6   3    7.79    1.12 
  24  -6   3  287.94    5.74 
  24  -6   3  291.66    6.26 
  24   6   3  290.64    6.36 
  26  -6   3    0.42    0.61 
  26   6   3    0.13    0.54 
  26  -6   3    0.00    0.52 
  28   6   3    2.42    0.86 
  28  -6   3    3.08    0.78 
  28  -6   3    2.34    0.89 
  30  -6   3    7.30    1.32 
  30   6   3    5.94    1.19 
  30  -6   3    6.96    1.06 
  32  -6   3   13.71    1.42 
  32   6   3   12.56    1.69 
  32  -6   3    9.87    1.53 
  34  -6   3    7.22    1.33 
  34   6   3    6.84    1.33 
  36  -6   3  137.26    4.85 
  36   6   3  138.68    4.93 
  38   6   3   -0.96    0.68 
  38  -6   3    1.01    1.04 
  40   6   3    0.83    0.85 
  40  -6   3    1.58    1.01 
  42  -6   3    4.33    1.41 
  42   6   3    3.79    1.25 
  47   7  -3    1.83    1.13 
  45   7  -3   45.30    2.95 
  45  -7  -3   44.73    3.55 
  43   7  -3   12.37    1.75 
  43  -7  -3   10.48    1.80 
  41  -7  -3    1.39    0.88 
  41   7  -3    0.90    0.89 
  39  -7  -3    1.32    0.93 
  39   7  -3   -0.60    0.70 
  37   7  -3   35.35    2.40 
  37  -7  -3   35.85    2.55 
  35  -7  -3    1.82    0.93 
  35   7  -3    2.30    0.90 
  35  -7  -3    3.20    0.93 
  33  -7  -3  167.99    4.39 
  33   7  -3  159.79    4.62 
  31   7  -3    5.00    1.05 
  31  -7  -3    5.00    1.01 
  29  -7  -3    0.34    0.61 
  29   7  -3   -0.36    0.46 
  27   7  -3   34.06    1.87 
  27  -7  -3   37.06    1.91 
  25   7  -3   46.10    2.11 
  25   7  -3   44.22    2.01 
  25  -7  -3   45.06    2.05 
  23   7  -3   16.28    1.24 
  23   7  -3   14.67    1.24 
  23  -7  -3   16.24    1.29 
  21   7  -3   93.10    2.79 
  21  -7  -3   92.61    2.81 
  21   7  -3   94.64    2.72 
  19  -7  -3   22.44    1.40 
  19   7  -3   24.09    1.31 
  19   7  -3   22.52    1.36 
 -17  -7   3    0.10    0.17 
  17  -7  -3    0.20    0.40 
  17   7  -3   -0.43    0.30 
  17   7  -3   -0.25    0.40 
  15  -7  -3  145.76    3.39 
 -15  -7   3  134.88    2.51 
  15   7  -3  143.37    3.25 
  15   7  -3  146.28    3.13 
 -13  -7   3   44.00    1.29 
  13   7  -3   46.45    1.53 
  13  -7  -3   44.97    1.75 
  13   7  -3   44.20    1.62 
  11   7  -3   29.11    1.30 
  11  -7  -3   26.55    1.33 
 -11  -7   3   29.39    1.08 
  11   7  -3   29.48    1.18 
   9  -7  -3  599.23    8.88 
   9   7  -3  593.44    8.39 
   9   7  -3  586.31    8.50 
  -9  -7   3  589.69    8.35 
   7  -7  -3    9.29    0.87 
  -7  -7   3    9.06    0.70 
   7   7  -3    7.92    0.61 
   7   7  -3    8.77    0.70 
   5   7  -3    3.64    0.54 
   5   7  -3    4.18    0.45 
  -5   7   3    3.41    0.53 
  -5  -7   3    3.47    0.52 
   5  -7  -3    3.05    0.49 
  -3  -7   3  242.79    4.26 
   3   7  -3  240.77    3.87 
  -3   7   3  239.00    4.35 
   3  -7  -3  235.41    4.22 
   3   7  -3  243.33    4.16 
   1  -7  -3    4.92    0.58 
  -1   7   3    6.85    0.75 
   1   7  -3    6.79    0.71 
  -1  -7   3    6.22    0.73 
   1   7   3  147.41    3.15 
   1  -7   3  149.62    3.17 
   1   7   3  149.25    2.31 
  -1  -7  -3  143.49    2.88 
   3   7   3    2.21    0.29 
   3  -7   3    1.20    0.40 
  -3  -7  -3    1.36    0.36 
   3   7   3    1.20    0.44 
   5   7   3    3.49    0.38 
  -5  -7  -3    3.30    0.45 
   5  -7   3    2.54    0.56 
   5   7   3    2.63    0.51 
   7  -7   3    6.68    0.81 
   7   7   3    4.57    0.68 
   7   7   3    5.85    0.50 
  -7  -7  -3    5.31    0.52 
   9  -7   3  581.89    8.96 
   9   7   3  591.87    9.16 
  -9  -7  -3  579.97    7.93 
 -11  -7  -3    2.16    0.33 
  11   7   3    1.13    0.58 
  11  -7   3    1.02    0.47 
 -13  -7  -3   34.41    0.94 
  13   7   3   33.38    1.68 
 -15  -7  -3   32.87    0.82 
  15   7   3   33.43    1.68 
  15  -7   3   36.67    1.70 
  17   7   3    0.42    0.49 
  17  -7   3    0.67    0.57 
  19   7   3   37.89    1.97 
  19  -7   3   36.28    1.78 
  21  -7   3  487.15    8.26 
  21   7   3  474.95    8.74 
  23   7   3   -1.16    0.49 
  23  -7   3    0.66    0.59 
  23  -7   3    0.40    0.55 
  25   7   3   49.47    2.46 
  25  -7   3   49.19    2.39 
  25  -7   3   52.11    2.28 
  27   7   3    1.65    0.79 
  27  -7   3    1.27    0.69 
  27  -7   3    3.19    0.88 
  29   7   3    0.68    0.66 
  29  -7   3    0.52    0.61 
  29  -7   3    0.34    0.56 
  31  -7   3    7.97    1.34 
  31  -7   3    9.33    1.26 
  31   7   3   11.75    1.65 
  33  -7   3  141.12    4.08 
  33   7   3  144.53    4.83 
  33  -7   3  140.78    4.73 
  35  -7   3    4.19    1.12 
  35   7   3    6.31    1.39 
  37  -7   3   27.53    2.37 
  37   7   3   25.05    2.54 
  39   7   3   -1.46    0.73 
  39  -7   3   -1.16    0.76 
  41   7   3    0.21    0.93 
  41  -7   3    0.06    0.73 
  46   8  -3    1.56    1.07 
  44   8  -3   13.92    1.99 
  44   8  -3   15.82    2.05 
  44  -8  -3   14.31    2.13 
  42  -8  -3   18.38    2.31 
  42   8  -3   20.12    2.28 
  42   8  -3   24.06    2.40 
  40   8  -3    0.21    0.83 
  40  -8  -3   -0.46    0.72 
  40   8  -3    1.05    0.82 
  38   8  -3   15.91    1.93 
  38   8  -3   15.41    1.77 
  38  -8  -3   19.31    2.15 
  36  -8  -3  142.85    4.87 
  36   8  -3  133.56    4.42 
  36   8  -3  134.82    4.45 
  36  -8  -3  138.37    4.21 
  34  -8  -3    1.22    0.75 
  34   8  -3   -0.47    0.59 
  34   8  -3    0.67    0.66 
  32  -8  -3   15.14    1.62 
  32   8  -3   16.43    1.75 
  32   8  -3   13.26    1.53 
  30  -8  -3  118.44    3.67 
  30   8  -3  118.30    3.70 
  30   8  -3  111.07    3.68 
  28  -8  -3    9.81    1.28 
  28   8  -3    8.02    1.21 
  28   8  -3    7.83    1.12 
  26  -8  -3    8.16    1.16 
  26   8  -3    8.34    1.18 
  26   8  -3    9.55    1.14 
  24   8  -3  487.01    8.46 
  24  -8  -3  503.43    8.65 
  24   8  -3  489.39    8.49 
  22   8  -3    3.54    0.76 
  22  -8  -3    3.45    0.76 
  22   8  -3    2.18    0.66 
  20   8  -3    0.16    0.44 
  20   8  -3    0.13    0.50 
  20  -8  -3    0.11    0.53 
 -18  -8   3  332.21    5.10 
  18   8  -3  322.22    5.87 
  18   8  -3  328.02    5.97 
  18  -8  -3  338.58    6.25 
  16   8  -3   10.65    1.04 
  16  -8  -3   10.17    1.14 
 -16  -8   3    8.93    0.60 
  16   8  -3    7.55    0.80 
  14   8  -3    3.72    0.59 
 -14  -8   3    4.47    0.53 
  14   8  -3    3.74    0.67 
  14  -8  -3    3.95    0.78 
  12  -8  -3 1388.05   18.52 
 -12  -8   3 1341.88   17.58 
  12   8  -3 1338.68   18.09 
  12   8  -3 1368.98   17.87 
  10   8  -3   18.83    1.03 
  10  -8  -3   20.43    1.21 
  10   8  -3   21.92    1.19 
 -10  -8   3   19.72    1.00 
  -8  -8   3    6.94    0.73 
   8   8  -3    7.85    0.82 
   8   8  -3    6.99    0.69 
   8  -8  -3    8.00    0.91 
   6  -8  -3  636.19    9.38 
  -6  -8   3  617.53    9.11 
   6   8  -3  643.02    8.92 
   6   8  -3  627.67    9.03 
   4  -8  -3   26.60    1.25 
   4   8  -3   25.39    1.02 
   4   8  -3   26.18    1.19 
  -4   8   3   25.11    1.23 
  -4  -8   3   25.42    1.21 
   2  -8  -3    9.35    0.80 
  -2  -8   3    6.97    0.77 
   2   8  -3    8.59    0.85 
   2   8  -3    7.34    0.61 
  -2   8   3    8.13    0.87 
   0   8   3 1819.11   22.46 
   0  -8  -3 1853.16   23.43 
   0  -8   3 1808.76   23.72 
   0   8  -3 1812.03   23.02 
   0   8   3 1836.08   24.08 
   2  -8   3    1.04    0.46 
  -2  -8  -3    1.19    0.40 
   2   8   3    0.57    0.38 
   2   8   3    0.86    0.26 
   4   8   3    7.51    0.81 
   4  -8   3    7.65    0.87 
  -4  -8  -3    8.72    0.71 
   4   8   3    8.75    0.54 
   6  -8   3  337.81    5.98 
  -6  -8  -3  340.67    5.28 
   6   8   3  344.07    4.99 
   6   8   3  342.21    6.05 
   8   8   3    0.50    0.44 
  -8  -8  -3    0.45    0.30 
   8   8   3    0.06    0.26 
   8  -8   3    0.52    0.45 
 -10  -8  -3    0.43    0.27 
  10  -8   3    0.26    0.39 
  10   8   3    0.45    0.32 
  10   8   3    0.13    0.44 
 -12  -8  -3  731.28    9.63 
  12   8   3  724.54   11.26 
  12  -8   3  724.55   11.04 
  14   8   3    1.53    0.57 
 -14  -8  -3    1.27    0.29 
  14  -8   3    0.56    0.47 
  16  -8   3    1.22    0.60 
  16   8   3    0.30    0.47 
  18   8   3  228.58    5.16 
  18  -8   3  218.24    4.87 
  20   8   3    4.43    0.88 
  20  -8   3    4.06    0.87 
  22  -8   3    1.49    0.65 
  22   8   3   -0.13    0.60 
  24   8   3  322.08    7.02 
  24  -8   3  330.68    6.59 
  26  -8   3    7.01    1.11 
  26  -8   3    6.22    1.12 
  26   8   3    6.14    1.11 
  28  -8   3    0.11    0.63 
  28  -8   3    1.59    0.71 
  28   8   3    0.55    0.70 
  30  -8   3   67.66    3.16 
  30   8   3   72.53    3.27 
  30  -8   3   69.32    2.87 
  32  -8   3   10.99    1.55 
  32  -8   3   13.58    1.52 
  32   8   3   15.56    1.84 
  34   8   3   -0.43    0.78 
  34  -8   3    0.02    0.69 
  34  -8   3    0.22    0.69 
  36  -8   3   75.14    3.66 
  36   8   3   73.66    3.67 
  38   8   3    3.36    1.21 
  38  -8   3    5.56    1.31 
  40  -8   3   -0.29    0.74 
  40   8   3   -0.15    0.93 
  42   8   3    6.36    2.18 
  45   9  -3   15.87    2.11 
  43   9  -3    2.97    1.06 
  43  -9  -3    3.12    1.16 
  43   9  -3    1.98    1.10 
  41   9  -3    4.21    1.22 
  41  -9  -3    5.08    1.35 
  41   9  -3    3.16    0.99 
  39   9  -3   35.92    2.52 
  39   9  -3   37.64    2.53 
  39  -9  -3   38.99    2.81 
  37  -9  -3    4.09    1.12 
  37   9  -3    7.42    1.45 
  37  -9  -3    5.16    1.32 
  37   9  -3    7.43    1.38 
  35   9  -3   10.06    1.41 
  35  -9  -3   10.28    1.48 
  35   9  -3   10.19    1.44 
  33   9  -3   22.05    1.80 
  33  -9  -3   21.19    1.79 
  33   9  -3   21.02    1.82 
  31   9  -3    0.47    0.65 
  31   9  -3    0.69    0.67 
  31  -9  -3   -0.51    0.65 
  29   9  -3   39.43    2.19 
  29  -9  -3   33.86    2.13 
  29   9  -3   36.60    2.10 
  27   9  -3   38.78    2.11 
  27   9  -3   40.76    2.08 
  27  -9  -3   37.77    2.10 
  25  -9  -3   18.13    1.56 
  25   9  -3   18.70    1.48 
  25   9  -3   20.89    1.49 
  23   9  -3    8.42    1.06 
  23  -9  -3    8.27    1.14 
  23   9  -3    8.70    1.12 
  21   9  -3    0.38    0.51 
  21  -9  -3    1.18    0.65 
  21   9  -3    0.38    0.49 
  19   9  -3    0.35    0.40 
  19  -9  -3    0.01    0.52 
  19   9  -3    0.29    0.47 
  17  -9  -3   70.59    2.55 
 -17  -9   3   69.42    1.72 
  17   9  -3   70.47    2.37 
  17   9  -3   72.12    2.29 
  15   9  -3   79.41    2.32 
 -15  -9   3   79.72    1.94 
  15  -9  -3   85.98    2.71 
  15   9  -3   80.80    2.45 
 -13  -9   3    9.24    0.75 
  13   9  -3    9.34    0.82 
  13   9  -3    8.46    0.91 
  13  -9  -3    8.99    1.01 
  11   9  -3   12.79    0.90 
  11  -9  -3   12.47    1.10 
  11   9  -3   12.07    0.98 
 -11  -9   3   13.35    0.91 
  -9  -9   3   35.06    1.40 
   9   9  -3   32.43    1.45 
   9   9  -3   32.38    1.30 
   9  -9  -3   34.69    1.62 
   7   9  -3   44.87    1.51 
  -7  -9   3   43.79    1.62 
   7  -9  -3   45.17    1.78 
   7   9  -3   44.94    1.66 
   5  -9  -3   65.96    2.13 
   5   9  -3   66.99    2.03 
  -5  -9   3   66.93    2.06 
   5   9  -3   67.95    1.84 
  -3  -9   3   56.90    1.92 
  -3   9   3   53.97    1.92 
   3   9  -3   54.68    1.81 
   3  -9  -3   53.77    1.86 
   3   9  -3   54.39    1.63 
  -1  -9   3   40.64    1.67 
  -1   9   3   42.22    1.70 
   1  -9  -3   44.50    1.62 
   1   9  -3   42.60    1.62 
   1  -9   3   47.62    1.83 
   1   9   3   45.91    1.77 
  -1  -9  -3   49.56    1.67 
   1   9   3   50.32    1.27 
   3   9   3   62.87    1.50 
   3  -9   3   61.25    2.11 
   3   9   3   65.75    2.17 
  -3  -9  -3   63.65    1.87 
  -5  -9  -3   40.35    1.43 
   5   9   3   39.96    1.74 
   5   9   3   40.45    1.21 
   5  -9   3   39.76    1.75 
   7  -9   3   -0.02    0.42 
   7   9   3    0.06    0.27 
   7   9   3   -0.49    0.39 
  -7  -9  -3   -1.16    0.28 
   9  -9   3    1.43    0.57 
   9   9   3    0.82    0.47 
  -9  -9  -3    0.12    0.30 
   9   9   3    0.17    0.30 
  11   9   3   25.47    1.51 
  11  -9   3   21.83    1.39 
 -11  -9  -3   22.41    0.97 
  11   9   3   21.31    1.06 
  13   9   3    7.17    0.77 
  13   9   3    6.95    0.98 
 -13  -9  -3    7.86    0.60 
  13  -9   3    7.30    0.98 
  15   9   3  121.04    3.49 
  15  -9   3  125.24    3.48 
  17  -9   3   34.27    1.87 
  17   9   3   32.29    1.84 
  19  -9   3    3.10    0.81 
  19   9   3    3.46    0.90 
  21  -9   3   24.53    1.70 
  21   9   3   22.92    1.73 
  23  -9   3   20.55    1.62 
  23   9   3   17.68    1.78 
  25  -9   3   11.13    1.39 
  25   9   3   10.79    1.41 
  27  -9   3   70.76    2.89 
  27  -9   3   70.86    3.04 
  27   9   3   69.89    3.12 
  29  -9   3   29.06    2.12 
  29   9   3   26.73    2.13 
  29  -9   3   25.39    1.90 
  31  -9   3    7.79    1.28 
  31  -9   3    6.06    1.27 
  31   9   3    4.61    1.17 
  33  -9   3   27.90    2.29 
  33  -9   3   27.70    2.04 
  33   9   3   17.84    2.05 
  35  -9   3    1.74    0.97 
  35   9   3    0.98    0.94 
  35  -9   3    1.01    0.88 
  37   9   3    1.58    1.01 
  37  -9   3    1.00    0.87 
  39   9   3   16.31    2.10 
  39  -9   3   18.87    2.33 
  41   9   3    8.17    1.80 
  41  -9   3   11.30    2.80 
  42  10  -3   12.87    1.83 
  42  10  -3    9.99    1.70 
  42 -10  -3   10.74    1.90 
  40 -10  -3    4.25    1.26 
  40  10  -3    7.28    1.42 
  40  10  -3    2.15    1.05 
  38  10  -3    1.70    0.87 
  38  10  -3    6.01    1.30 
  38 -10  -3    3.45    1.16 
  36 -10  -3   25.31    2.21 
  36  10  -3   24.96    2.09 
  36  10  -3   24.56    2.03 
  34  10  -3    0.72    0.80 
  34  10  -3    0.34    0.70 
  34 -10  -3    0.62    0.81 
  32  10  -3    1.95    0.79 
  32 -10  -3    0.74    0.80 
  32  10  -3    2.38    0.90 
  30  10  -3   24.30    1.85 
  30  10  -3   27.73    1.91 
  30 -10  -3   25.90    1.94 
  28  10  -3   10.20    1.36 
  28  10  -3    9.20    1.24 
  28 -10  -3    8.46    1.27 
  26  10  -3    1.09    0.67 
  26 -10  -3    1.77    0.83 
  26  10  -3    1.97    0.70 
  24  10  -3   90.34    2.99 
  24 -10  -3   91.32    3.24 
  24  10  -3   90.85    3.07 
  22  10  -3   10.80    1.21 
  22  10  -3   12.13    1.24 
  22 -10  -3   11.83    1.36 
  20  10  -3   -0.77    0.37 
  20 -10  -3    0.18    0.57 
  20  10  -3    0.11    0.46 
  18  10  -3  193.79    4.43 
  18  10  -3  204.46    4.40 
  18 -10  -3  207.81    4.81 
  16  10  -3    5.38    0.87 
  16  10  -3    3.75    0.73 
 -16 -10   3    5.03    0.60 
  16 -10  -3    3.19    0.73 
  14  10  -3    0.52    0.46 
  14 -10  -3   -0.26    0.54 
 -14 -10   3    0.61    0.38 
  14  10  -3    0.59    0.47 
  12  10  -3   88.38    2.56 
  12  10  -3   90.33    2.44 
  12 -10  -3   84.60    2.74 
 -12 -10   3   87.59    2.31 
  10 -10  -3    0.62    0.55 
  10  10  -3    0.16    0.34 
 -10 -10   3    0.18    0.36 
  10  10  -3    0.70    0.45 
   8  10  -3    0.80    0.38 
  -8 -10   3   -0.05    0.34 
   8 -10  -3    0.93    0.47 
   8  10  -3    0.63    0.42 
   6  10  -3  135.81    3.16 
   6  10  -3  136.35    2.97 
  -6 -10   3  136.35    3.20 
   6 -10  -3  136.65    3.36 
   4  10  -3    3.31    0.60 
   4  10  -3    3.25    0.54 
   4 -10  -3    2.87    0.58 
  -4 -10   3    2.20    0.55 
  -4  10   3    2.69    0.56 
  -2 -10   3    1.54    0.55 
   2 -10  -3    0.42    0.44 
  -2  10   3    0.87    0.43 
   2  10  -3    0.99    0.45 
   2  10  -3    0.86    0.36 
   0  10   3  142.02    3.45 
   0 -10  -3  139.83    3.21 
   0 -10   3  138.48    3.39 
   2  10   3    0.56    0.43 
   2 -10   3    1.32    0.56 
  -2 -10  -3    1.65    0.46 
   2  10   3    1.31    0.36 
   4  10   3    2.11    0.42 
  -4 -10  -3    2.11    0.50 
   4  10   3    1.43    0.50 
   4 -10   3    1.81    0.58 
   6  10   3  260.16    4.24 
   6  10   3  258.52    5.27 
  -6 -10  -3  265.18    4.65 
   6 -10   3  268.37    5.34 
   8  10   3    1.07    0.37 
   8 -10   3    0.83    0.59 
   8  10   3    0.55    0.48 
  -8 -10  -3    1.19    0.40 
  10 -10   3    8.55    1.01 
  10  10   3   11.27    1.23 
 -10 -10  -3   11.36    0.82 
  10  10   3   10.65    0.80 
 -12 -10  -3   60.73    1.67 
  12  10   3   61.98    1.88 
  12  10   3   59.82    2.38 
  12 -10   3   56.35    2.28 
  14  10   3    8.31    1.16 
  14 -10   3    9.10    1.17 
  14  10   3   10.68    0.92 
  16 -10   3    4.87    0.87 
  16  10   3    4.56    0.73 
  16  10   3    3.74    0.84 
  18  10   3   61.83    2.63 
  18  10   3   58.84    2.10 
  18 -10   3   64.83    2.58 
  20 -10   3   -0.51    0.56 
  20  10   3    0.23    0.58 
  22 -10   3    0.66    0.67 
  22  10   3    1.95    0.82 
  24  10   3   79.47    3.26 
  24 -10   3   78.86    3.08 
  26  10   3    4.36    1.12 
  26 -10   3    5.83    1.14 
  28 -10   3    3.16    0.93 
  28 -10   3    4.16    1.05 
  28  10   3    3.82    1.14 
  30 -10   3   44.95    2.54 
  30 -10   3   52.40    2.88 
  30  10   3   48.20    2.73 
  32 -10   3   -0.87    0.58 
  32  10   3    0.54    0.72 
  32 -10   3    0.63    0.75 
  34  10   3    5.46    1.38 
  34 -10   3    4.38    1.11 
  34 -10   3    6.61    1.49 
  36  10   3    9.07    1.65 
  36 -10   3   10.43    1.75 
  38  10   3    0.99    0.95 
  38 -10   3    0.50    0.92 
  40 -10   3   -0.03    0.77 
  40  10   3   -0.37    0.69 
  41 -11  -3    3.14    1.30 
  41  11  -3    2.44    1.50 
  41  11  -3    2.39    1.00 
  39 -11  -3   12.04    1.72 
  39  11  -3   12.32    1.76 
  39  11  -3   15.23    1.93 
  37  11  -3   33.11    2.42 
  37  11  -3   40.36    2.60 
  37 -11  -3   39.96    2.68 
  35  11  -3    0.36    0.74 
  35  11  -3    1.36    0.83 
  35 -11  -3    0.63    0.90 
  33  11  -3   30.55    2.11 
  33  11  -3   30.77    2.16 
  33 -11  -3   31.97    2.27 
  31 -11  -3   20.24    2.01 
  31  11  -3   24.19    1.88 
  31  11  -3   19.48    1.72 
  29 -11  -3    1.94    0.90 
  29  11  -3    1.64    0.82 
  29  11  -3    1.95    0.79 
  27  11  -3   46.79    2.38 
  27  11  -3   46.04    2.32 
  27 -11  -3   48.16    2.50 
  25 -11  -3   26.49    1.95 
  25  11  -3   25.62    1.78 
  25  11  -3   24.29    1.78 
  23  11  -3    0.54    0.65 
  23  11  -3    1.35    0.70 
  23 -11  -3    0.78    0.82 
  21  11  -3   96.51    3.12 
  21  11  -3   95.41    3.00 
  21 -11  -3   97.25    3.32 
  19  11  -3   30.60    1.68 
  19  11  -3   32.08    1.66 
  19 -11  -3   31.21    1.96 
  17  11  -3   26.63    1.52 
  17  11  -3   25.01    1.54 
  17 -11  -3   23.67    1.62 
 -15 -11   3  138.85    3.08 
  15 -11  -3  142.30    3.90 
  15  11  -3  139.60    3.57 
  15  11  -3  146.99    3.52 
 -13 -11   3   69.47    2.09 
  13 -11  -3   71.54    2.62 
  13  11  -3   67.97    2.23 
  13  11  -3   64.93    2.31 
 -11 -11   3   10.79    0.94 
  11  11  -3   10.24    0.92 
  11 -11  -3    8.20    1.06 
  11  11  -3   11.04    1.08 
  -9 -11   3  106.68    2.82 
   9 -11  -3  106.07    3.12 
   9  11  -3  109.46    2.91 
   9  11  -3  111.34    2.76 
  -7 -11   3   17.86    1.20 
   7 -11  -3   23.44    1.47 
   7  11  -3   23.17    1.21 
   7  11  -3   25.55    1.37 
   5  11  -3   22.73    1.32 
   5 -11  -3   20.30    1.31 
  -5 -11   3   23.46    1.36 
  -5  11   3   20.27    1.33 
   5  11  -3   21.95    1.18 
   3  11  -3  278.45    5.19 
   3 -11  -3  278.35    5.36 
  -3 -11   3  279.84    5.38 
   3  11  -3  283.92    5.02 
  -3  11   3  267.58    5.42 
  -1  11   3   51.66    2.03 
   1 -11  -3   49.78    1.93 
   1  11  -3   52.86    1.97 
  -1 -11   3   50.79    2.05 
  -1 -11  -3   48.11    1.86 
   1  11   3   49.25    2.04 
   1  11   3   49.53    1.46 
   1 -11   3   48.83    2.03 
   3 -11   3  113.33    3.21 
   3  11   3  112.72    3.17 
  -3 -11  -3  117.01    2.91 
   3  11   3  116.03    2.41 
   5  11   3   23.56    1.44 
   5 -11   3   21.43    1.47 
  -5 -11  -3   21.00    1.20 
   5  11   3   20.75    1.00 
   7  11   3   48.47    2.12 
   7 -11   3   48.79    2.13 
   7  11   3   48.83    1.54 
  -7 -11  -3   47.94    1.71 
   9  11   3  361.15    5.69 
   9 -11   3  352.03    6.80 
  -9 -11  -3  364.68    5.88 
   9  11   3  352.61    6.81 
  11 -11   3   41.66    2.06 
  11  11   3   39.17    1.52 
  11  11   3   36.11    1.90 
 -11 -11  -3   37.56    1.42 
  13  11   3   91.41    3.10 
  13 -11   3   89.09    3.06 
  13  11   3   92.61    2.46 
  15 -11   3   41.04    2.13 
  15  11   3   38.45    2.03 
  15  11   3   38.62    1.65 
  17  11   3   13.54    1.08 
  17  11   3   11.02    1.35 
  17 -11   3   13.76    1.53 
  19  11   3   23.71    1.45 
  19 -11   3   23.46    1.79 
  19  11   3   21.35    1.72 
  21 -11   3  136.93    4.09 
  21  11   3  134.27    4.15 
  21  11   3  134.59    3.56 
  23  11   3    0.20    0.56 
  23 -11   3   -0.19    0.70 
  23  11   3   -1.73    0.56 
  25 -11   3   60.73    2.85 
  25  11   3   58.48    2.47 
  25  11   3   65.07    3.08 
  27  11   3   24.39    1.98 
  27 -11   3   26.72    2.03 
  29  11   3   13.77    1.76 
  29 -11   3   13.52    1.65 
  31 -11   3   18.41    1.97 
  31 -11   3   15.41    1.93 
  31  11   3   15.64    1.90 
  33 -11   3   46.21    2.69 
  33  11   3   48.43    3.00 
  33 -11   3   53.70    3.07 
  35 -11   3    2.07    1.05 
  35  11   3    2.01    1.17 
  35 -11   3    3.15    1.02 
  37 -11   3   20.57    2.32 
  37  11   3   28.41    2.79 
  39 -11   3    2.48    1.25 
  39  11   3    2.70    1.29 
  41  11   3    1.09    0.96 
  40  12  -3   -0.44    0.79 
  40 -12  -3    0.87    0.98 
  38  12  -3    3.06    1.11 
  38 -12  -3    2.66    1.17 
  38  12  -3    3.96    1.41 
  36 -12  -3  111.42    4.25 
  36  12  -3   96.89    3.87 
  36  12  -3  100.21    4.01 
  34  12  -3    0.07    0.80 
  34 -12  -3   -0.67    0.83 
  34  12  -3    0.66    0.82 
  32 -12  -3   -0.05    0.83 
  32  12  -3   -0.52    0.67 
  32  12  -3    0.66    0.71 
  30  12  -3   24.20    1.91 
  30  12  -3   21.03    1.76 
  30 -12  -3   17.18    1.90 
  28 -12  -3    0.52    0.77 
  28  12  -3   -0.44    0.58 
  28  12  -3   -0.62    0.64 
  26  12  -3    1.63    0.76 
  26 -12  -3    2.83    0.86 
  26  12  -3    2.15    0.79 
  24 -12  -3  301.49    6.73 
  24  12  -3  290.84    6.32 
  24  12  -3  296.28    6.30 
  22  12  -3    1.00    0.71 
  22 -12  -3    0.84    0.80 
  22  12  -3    1.84    0.75 
  20  12  -3   -0.30    0.51 
  20 -12  -3   -0.46    0.59 
  20  12  -3    0.40    0.58 
  18 -12  -3   90.04    3.27 
  18  12  -3   93.32    3.00 
  18  12  -3   90.70    2.88 
  16 -12  -3   31.33    1.93 
  16  12  -3   29.20    1.69 
  16  12  -3   35.53    1.73 
  14 -12  -3    2.00    0.72 
  14  12  -3    1.47    0.62 
  14  12  -3    1.39    0.59 
 -14 -12   3    1.96    0.54 
 -12 -12   3  513.84    8.25 
  12 -12  -3  505.88    8.97 
  12  12  -3  515.90    8.47 
  12  12  -3  525.98    8.42 
  10 -12  -3    8.28    1.08 
  10  12  -3    8.31    1.02 
  10  12  -3    9.27    1.06 
 -10 -12   3   11.06    1.13 
   8 -12  -3    2.50    0.70 
   8  12  -3    1.04    0.53 
  -8 -12   3    3.07    0.67 
   8  12  -3    2.38    0.64 
   6  12  -3   88.94    2.50 
   6  12  -3   89.40    2.67 
   6 -12  -3   86.63    2.82 
  -6 -12   3   87.47    2.71 
   4  12  -3    2.99    0.63 
  -4 -12   3    3.77    0.80 
   4 -12  -3    3.08    0.73 
   4  12  -3    4.51    0.81 
  -4  12   3    3.30    0.72 
   2 -12  -3    0.61    0.52 
  -2 -12   3    1.54    0.64 
   2  12  -3    0.68    0.55 
  -2  12   3    0.44    0.53 
   0 -12   3  583.31    9.64 
   0  12   3  603.37    9.82 
   0 -12  -3  595.44    9.42 
  -2 -12  -3   13.52    1.15 
   2  12   3   14.05    1.24 
   2 -12   3   13.14    1.32 
   2  12   3   13.46    0.91 
   4  12   3    4.51    0.61 
  -4 -12  -3    4.14    0.74 
   4 -12   3    2.09    0.71 
   4  12   3    2.49    0.76 
   6  12   3  156.37    3.11 
   6  12   3  146.62    3.95 
   6 -12   3  156.87    4.06 
  -6 -12  -3  150.80    3.45 
   8  12   3    5.31    0.69 
   8 -12   3    5.72    1.02 
  -8 -12  -3    5.76    0.77 
   8  12   3    6.42    1.05 
 -10 -12  -3   12.07    0.98 
  10 -12   3    9.76    1.19 
  10  12   3   12.88    0.96 
  10  12   3   12.23    1.39 
  12  12   3  543.95    8.31 
  12  12   3  563.89    9.73 
  12 -12   3  547.97    9.64 
  14  12   3    0.34    0.45 
  14  12   3    1.63    0.77 
  14 -12   3    1.25    0.64 
  16 -12   3    4.40    1.01 
  16  12   3    4.34    0.75 
  16  12   3    2.69    0.80 
  18 -12   3   42.59    2.37 
  18  12   3   48.50    1.97 
  18  12   3   48.85    2.46 
  20  12   3    0.39    0.51 
  20 -12   3    0.88    0.78 
  20  12   3    0.61    0.74 
  22  12   3    0.20    0.83 
  22  12   3    0.49    0.56 
  22 -12   3    1.05    0.81 
  24 -12   3  177.95    5.03 
  24  12   3  171.13    5.09 
  24  12   3  175.66    4.39 
  26  12   3    0.41    0.80 
  26  12   3   -0.11    0.53 
  26 -12   3   -0.26    0.70 
  28  12   3    2.85    1.10 
  28 -12   3    2.39    0.94 
  28  12   3    3.56    0.96 
  30 -12   3    8.76    1.50 
  30  12   3    9.28    1.50 
  30  12   3   10.13    1.37 
  32  12   3    0.49    0.71 
  32 -12   3    0.77    0.86 
  32  12   3    1.80    1.00 
  32 -12   3    1.13    0.88 
  34 -12   3   -0.03    0.61 
  34  12   3    0.34    0.76 
  34 -12   3   -1.21    0.69 
  34  12   3   -0.69    0.77 
  36 -12   3   51.55    3.00 
  36  12   3   41.72    2.88 
  36 -12   3   40.70    2.92 
  36  12   3   40.75    2.60 
  38  12   3    3.42    1.32 
  38  12   3    1.72    0.96 
  38 -12   3    3.93    1.41 
  40  12   3    1.50    0.78 
  39 -13  -3   24.64    2.45 
  39  13  -3   16.63    2.01 
  37 -13  -3   -0.70    0.94 
  37  13  -3    0.76    0.84 
  35  13  -3    1.67    1.10 
  35  13  -3    3.60    1.21 
  35 -13  -3    4.63    1.42 
  33 -13  -3   13.80    1.85 
  33  13  -3   12.17    1.65 
  33  13  -3   15.03    1.81 
  31 -13  -3   15.17    1.89 
  31  13  -3   18.48    1.90 
  31  13  -3   21.93    2.14 
  29 -13  -3   13.88    1.76 
  29  13  -3   14.77    1.75 
  29  13  -3   14.77    1.70 
  27  13  -3   35.08    2.17 
  27 -13  -3   31.43    2.29 
  27  13  -3   30.42    1.98 
  25 -13  -3    5.80    1.26 
  25  13  -3    5.61    1.05 
  25  13  -3    6.56    1.17 
  23 -13  -3   10.64    1.50 
  23  13  -3    7.31    1.13 
  23  13  -3    7.08    1.14 
  21 -13  -3   23.63    1.94 
  21  13  -3   19.18    1.58 
  21  13  -3   19.78    1.56 
  19  13  -3   -0.14    0.55 
  19  13  -3    0.28    0.61 
  19 -13  -3    1.60    0.87 
  17  13  -3   26.28    1.68 
  17 -13  -3   20.88    1.83 
  17  13  -3   21.28    1.51 
  15  13  -3   35.15    1.85 
  15 -13  -3   37.72    2.18 
  15  13  -3   36.03    1.78 
 -13 -13   3   -0.27    0.42 
  13  13  -3   -0.35    0.39 
  13 -13  -3   -0.48    0.52 
  13  13  -3    0.61    0.55 
 -11 -13   3    2.18    0.64 
  11 -13  -3    2.46    0.73 
  11  13  -3    4.16    0.81 
  11  13  -3    3.53    0.70 
   9 -13  -3    0.20    0.50 
   9  13  -3   -0.06    0.46 
   9  13  -3   -0.48    0.40 
  -9 -13   3    0.33    0.51 
   7  13  -3   -0.51    0.37 
  -7 -13   3    0.16    0.48 
   7  13  -3    0.05    0.51 
   7 -13  -3    0.41    0.56 
   5  13  -3    1.51    0.63 
   5 -13  -3    1.58    0.67 
  -5 -13   3    0.99    0.57 
   5  13  -3    1.07    0.53 
   3 -13  -3    1.53    0.66 
  -3 -13   3    1.19    0.63 
   3  13  -3    1.13    0.62 
  -3  13   3    1.03    0.49 
  -1 -13   3    0.95    0.63 
   1 -13  -3    0.97    0.56 
  -1  13   3    0.55    0.51 
   1  13   3   -0.39    0.39 
   1 -13   3    0.49    0.57 
  -1 -13  -3    0.07    0.47 
   3  13   3   17.13    1.04 
   3 -13   3   15.93    1.41 
  -3 -13  -3   16.15    1.27 
   3  13   3   14.92    1.31 
   5  13   3    8.40    1.12 
   5 -13   3    8.59    1.14 
  -5 -13  -3   11.03    1.14 
   5  13   3   10.94    0.93 
   7 -13   3   -0.02    0.57 
   7  13   3    0.90    0.45 
   7  13   3    0.11    0.65 
  -7 -13  -3    1.08    0.56 
   9 -13   3    7.05    1.08 
   9  13   3    6.40    1.03 
  -9 -13  -3    8.09    0.90 
   9  13   3    7.07    0.80 
  11 -13   3   13.14    1.49 
  11  13   3   12.92    1.47 
  11  13   3    9.69    0.97 
  13 -13   3    0.63    0.66 
  13  13   3   -0.27    0.38 
  13  13   3   -0.95    0.50 
  15  13   3   55.74    2.61 
  15  13   3   54.09    2.02 
  17  13   3    7.93    1.36 
  17  13   3    9.53    1.09 
  17 -13   3    8.64    1.36 
  19  13   3   16.67    1.82 
  19  13   3   13.83    1.34 
  19 -13   3   19.07    1.92 
  21 -13   3   13.56    1.58 
  21  13   3   12.28    1.27 
  21  13   3   14.15    1.74 
  23  13   3    5.11    1.17 
  23 -13   3    6.10    1.31 
  23  13   3    5.68    0.99 
  25  13   3    1.84    0.93 
  25 -13   3    0.80    0.88 
  25  13   3    0.80    0.68 
  27  13   3   26.94    2.23 
  27  13   3   27.52    1.88 
  27 -13   3   25.45    2.18 
  29  13   3   10.28    1.62 
  29  13   3   13.29    1.61 
  29 -13   3   12.18    1.74 
  31  13   3    7.04    1.52 
  31  13   3    7.20    1.28 
  31 -13   3    6.83    1.47 
  33 -13   3   28.06    2.37 
  33 -13   3   26.51    2.34 
  33  13   3   26.69    2.02 
  33  13   3   26.27    2.55 
  35  13   3    0.20    0.94 
  35 -13   3    1.87    1.04 
  35 -13   3   -0.26    0.66 
  37 -13   3   -0.41    0.79 
  37  13   3    0.53    1.01 
  37 -13   3    0.36    1.20 
  40 -14  -3   -0.24    0.87 
  38 -14  -3    2.18    1.22 
  38  14  -3    0.66    0.85 
  36  14  -3   -1.04    0.66 
  36 -14  -3   -1.33    0.92 
  34  14  -3    7.14    1.45 
  34 -14  -3    6.73    1.56 
  32 -14  -3   -0.08    0.93 
  32  14  -3    1.20    0.85 
  32  14  -3    0.33    1.15 
  30  14  -3   93.76    3.69 
  30 -14  -3   92.29    3.96 
  30  14  -3   94.68    3.60 
  28 -14  -3   -0.50    0.65 
  28  14  -3    0.16    0.67 
  28  14  -3   -1.19    0.57 
  26  14  -3    3.05    0.91 
  26 -14  -3    2.04    1.09 
  26  14  -3    2.59    0.91 
  24  14  -3   11.27    1.43 
  24 -14  -3   11.05    1.57 
  24  14  -3    8.25    1.24 
  22  14  -3   10.98    1.39 
  22 -14  -3   12.63    1.67 
  22  14  -3    9.31    1.24 
  20  14  -3   -0.25    0.58 
  20 -14  -3    0.62    0.77 
  20  14  -3    0.44    0.69 
  18  14  -3  200.54    4.79 
  18  14  -3  207.02    4.95 
  18 -14  -3  195.89    5.32 
  16 -14  -3    8.26    1.27 
  16  14  -3    5.67    0.98 
  16  14  -3    6.61    1.05 
  14  14  -3    1.15    0.66 
  14 -14  -3    0.67    0.81 
  14  14  -3    1.02    0.60 
  12 -14  -3    3.03    0.98 
  12  14  -3    2.72    0.79 
 -12 -14   3    4.27    0.81 
  12  14  -3    2.94    0.77 
  10  14  -3   24.08    1.59 
  10  14  -3   20.58    1.41 
  10 -14  -3   20.88    1.73 
 -10 -14   3   20.15    1.44 
  -8 -14   3    5.11    0.91 
   8 -14  -3    3.28    0.87 
   8  14  -3    4.30    0.79 
   8  14  -3    5.20    0.92 
   6  14  -3  420.82    7.31 
   6 -14  -3  412.66    7.82 
   6  14  -3  416.37    7.39 
  -6 -14   3  414.27    7.59 
  -4 -14   3    8.60    1.12 
   4  14  -3    8.72    1.04 
   4  14  -3    9.72    1.21 
   4 -14  -3    7.07    1.08 
   2 -14  -3   15.16    1.49 
  -2  14   3   12.23    1.37 
  -2 -14   3   12.69    1.34 
   0 -14  -3   23.46    1.59 
   0  14   3   27.17    1.75 
   0 -14   3   28.16    1.77 
   2 -14   3    0.37    0.60 
  -2 -14  -3   -0.05    0.48 
   2  14   3    0.31    0.51 
   4  14   3    0.55    0.66 
   4 -14   3    1.48    0.74 
  -4 -14  -3    0.58    0.57 
  -6 -14  -3  304.40    5.85 
   6 -14   3  308.97    6.60 
   6  14   3  315.41    6.58 
   8  14   3    1.49    0.77 
   8 -14   3    1.79    0.83 
  -8 -14  -3    1.13    0.54 
  10 -14   3    4.26    0.95 
  10  14   3    5.26    1.01 
  12  14   3    2.75    0.91 
  12 -14   3    2.77    0.90 
  14 -14   3    0.20    0.62 
  14  14   3    1.43    0.75 
  16  14   3    0.18    0.67 
  16 -14   3    1.19    0.86 
  18  14   3  216.04    5.67 
  18 -14   3  217.24    5.74 
  20 -14   3    3.28    1.10 
  20  14   3    3.42    1.17 
  22 -14   3    6.60    1.36 
  22  14   3    6.48    1.28 
  24  14   3    0.51    0.80 
  24 -14   3    0.58    0.87 
  26 -14   3    4.26    1.19 
  26  14   3    2.61    1.08 
  28 -14   3    0.94    0.92 
  28  14   3    0.39    0.99 
  30 -14   3   32.07    2.60 
  30  14   3   28.72    2.46 
  32  14   3    1.10    0.95 
  32 -14   3   -0.45    0.83 
  34  14   3    1.51    1.11 
  34 -14   3    2.70    1.17 
  34 -14   3    1.62    0.92 
  36 -14   3    0.73    0.95 
  36  14   3   -0.60    0.94 
  38 -14   3    3.84    1.66 
  37  15  -3   12.25    1.84 
  37 -15  -3   10.24    1.81 
  35  15  -3    5.00    1.23 
  35 -15  -3    3.56    1.43 
  33  15  -3    8.67    1.51 
  33 -15  -3   10.52    1.88 
  31 -15  -3    2.21    1.24 
  31  15  -3    5.08    1.21 
  29 -15  -3   16.22    2.03 
  29  15  -3   15.81    1.84 
  27  15  -3   50.35    2.64 
  27 -15  -3   64.17    3.30 
  27  15  -3   53.95    2.78 
  25  15  -3   37.63    2.32 
  25  15  -3   35.50    2.20 
  25 -15  -3   37.12    2.48 
  23 -15  -3    9.60    1.56 
  23  15  -3    8.44    1.28 
  23  15  -3    9.06    1.33 
  21  15  -3    1.82    0.70 
  21 -15  -3    2.92    1.11 
  21  15  -3    3.07    0.91 
  19  15  -3   14.65    1.53 
  19  15  -3   14.63    1.52 
  19 -15  -3   14.02    1.67 
  17  15  -3   19.10    1.57 
  17  15  -3   17.74    1.68 
  17 -15  -3   22.28    1.94 
  15 -15  -3  123.13    4.07 
  15  15  -3  123.83    3.74 
  15  15  -3  129.56    3.70 
  13 -15  -3   37.62    2.26 
  13  15  -3   41.77    2.11 
  13  15  -3   41.40    2.14 
  11 -15  -3   17.95    1.75 
  11  15  -3   22.87    1.61 
  11  15  -3   18.09    1.43 
 -11 -15   3   18.91    1.45 
  -9 -15   3  138.38    3.84 
   9 -15  -3  150.04    4.34 
   9  15  -3  150.73    3.85 
   9  15  -3  148.81    3.97 
   7  15  -3   31.22    1.90 
   7 -15  -3   35.41    2.12 
  -7 -15   3   35.78    1.93 
   7  15  -3   34.73    1.80 
   5 -15  -3   74.77    2.91 
  -5 -15   3   72.39    2.77 
   5  15  -3   69.47    2.64 
   5  15  -3   68.30    2.53 
  -3 -15   3   94.91    3.20 
   3 -15  -3   86.88    3.10 
   1 -15  -3   72.67    2.77 
  -1  15   3   74.14    2.92 
  -1 -15   3   73.47    2.89 
   1  15   3   29.94    1.96 
   1 -15   3   30.04    1.94 
  -1 -15  -3   30.94    1.82 
  -3 -15  -3  115.70    3.39 
   3 -15   3  113.40    3.71 
   3  15   3  120.08    3.79 
   5 -15   3   39.32    2.26 
  -5 -15  -3   43.36    2.03 
   5  15   3   40.27    2.27 
   7  15   3   10.95    1.40 
   7 -15   3   12.88    1.57 
  -7 -15  -3   10.03    1.16 
   9  15   3   64.90    2.87 
   9 -15   3   65.68    2.95 
  11 -15   3   28.65    2.13 
  11  15   3   29.21    2.05 
  13 -15   3   50.44    2.70 
  13  15   3   49.56    2.64 
  15  15   3  118.21    4.09 
  15 -15   3  121.51    4.19 
  17 -15   3   38.34    2.42 
  17  15   3   35.35    2.30 
  19 -15   3   10.88    1.59 
  19  15   3   12.64    1.64 
  21  15   3   32.64    2.36 
  21 -15   3   33.76    2.38 
  23 -15   3    9.76    1.66 
  23  15   3    9.37    1.56 
  25 -15   3   42.94    2.79 
  25  15   3   39.19    2.62 
  27 -15   3   49.97    3.06 
  27  15   3   50.14    3.04 
  29 -15   3    8.95    1.69 
  29  15   3    8.45    1.62 
  31 -15   3   -0.48    0.85 
  31  15   3    0.92    0.92 
  33  15   3    1.46    1.06 
  33 -15   3    0.62    0.92 
  35 -15   3    4.19    1.37 
  36  16  -3   42.85    3.12 
  34 -16  -3    0.00    1.04 
  34  16  -3    1.79    1.01 
  32  16  -3    0.06    0.85 
  32 -16  -3    0.20    1.03 
  30  16  -3   13.79    1.86 
  30 -16  -3   12.27    2.03 
  28  16  -3    1.36    0.90 
  28 -16  -3    2.11    1.22 
  26 -16  -3    0.53    0.88 
  26  16  -3   -0.11    0.79 
  24  16  -3   72.14    3.15 
  24 -16  -3   82.24    3.69 
  24  16  -3   69.69    3.11 
  22 -16  -3    4.88    1.26 
  22  16  -3    2.82    0.93 
  22  16  -3    3.33    0.99 
  20  16  -3    2.28    0.89 
  20 -16  -3    1.60    0.95 
  20  16  -3    1.44    0.76 
  18  16  -3    1.01    0.77 
  18 -16  -3    0.68    0.80 
  18  16  -3    0.41    0.62 
  16 -16  -3    0.59    0.77 
  16  16  -3    0.36    0.62 
  16  16  -3    1.28    0.65 
  14 -16  -3    4.05    1.03 
  14  16  -3    1.85    0.77 
  14  16  -3    1.27    0.73 
  12  16  -3  133.95    3.78 
  12  16  -3  130.65    3.84 
  12 -16  -3  134.59    4.32 
  10 -16  -3   10.82    1.46 
 -10 -16   3   12.34    1.37 
  10  16  -3    9.47    1.23 
  10  16  -3   11.68    1.41 
   8  16  -3    2.17    0.77 
   8  16  -3    2.29    0.87 
  -8 -16   3    3.07    0.85 
   8 -16  -3    6.48    1.23 
  -6 -16   3    0.79    0.62 
   6  16  -3    0.16    0.58 
   6  16  -3    0.16    0.61 
   6 -16  -3    1.06    0.75 
   4 -16  -3   37.45    2.13 
  -4 -16   3   36.00    2.08 
  -2  16   3    0.56    0.67 
  -2 -16   3   -0.61    0.56 
   2 -16  -3    0.66    0.62 
   0 -16   3  103.77    3.56 
   0  16   3  103.88    3.58 
   0 -16  -3  102.85    3.38 
   2 -16   3   -0.25    0.64 
  -2 -16  -3    1.53    0.71 
   2  16   3    0.02    0.61 
   4 -16   3    0.37    0.74 
   4  16   3    2.64    0.80 
  -4 -16  -3    1.17    0.62 
   6  16   3   -0.14    0.69 
  -6 -16  -3    0.19    0.57 
   6 -16   3   -1.31    0.57 
   8  16   3    1.04    0.84 
   8 -16   3    1.36    0.90 
  10  16   3    0.07    0.80 
  10 -16   3    2.08    0.91 
  12  16   3  103.86    3.83 
  12 -16   3  111.95    4.03 
  14 -16   3    0.50    0.78 
  14  16   3    0.50    0.78 
  16 -16   3   -0.03    0.81 
  16  16   3    0.18    0.74 
  18 -16   3    3.70    1.19 
  18  16   3    2.39    0.97 
  20  16   3    4.04    1.17 
  20 -16   3    5.40    1.38 
  22 -16   3    1.69    1.09 
  22  16   3    2.43    1.13 
  24 -16   3   86.02    3.89 
  24  16   3   77.63    3.67 
  26 -16   3    0.27    0.91 
  26  16   3   -0.87    0.76 
  28 -16   3    0.75    1.05 
  28  16   3    1.81    1.07 
  30  16   3   -0.90    0.83 
  30 -16   3   -0.17    0.93 
  32 -16   3   -0.25    0.96 
  32  16   3    0.66    0.93 
  33  17  -3    3.51    1.01 
  31  17  -3   15.15    1.93 
  31 -17  -3    8.72    1.80 
  29 -17  -3    1.29    1.18 
  29  17  -3    0.23    0.84 
  27  17  -3   -1.21    0.67 
  27 -17  -3   -0.91    0.89 
  25 -17  -3    8.28    1.67 
  25  17  -3   10.60    1.61 
  23  17  -3    0.74    0.86 
  23 -17  -3    0.52    0.98 
  21 -17  -3    1.17    0.98 
  21  17  -3    3.72    1.06 
  19  17  -3    8.88    1.42 
  19  17  -3   10.01    1.34 
  19 -17  -3   11.30    1.73 
  17  17  -3   -0.35    0.56 
  17  17  -3   -0.14    0.60 
  17 -17  -3   -2.10    0.66 
  15  17  -3    0.63    0.69 
  15  17  -3    0.60    0.66 
  15 -17  -3    3.14    1.10 
  13 -17  -3    8.51    1.52 
  13  17  -3    7.71    1.19 
  13  17  -3    8.91    1.20 
  11  17  -3    0.30    0.73 
  11  17  -3    1.58    0.71 
  11 -17  -3    1.58    0.85 
   9  17  -3    0.34    0.59 
   9 -17  -3    0.11    0.79 
  -9 -17   3    1.01    0.87 
   9  17  -3   -0.20    0.62 
   7  17  -3    7.80    1.23 
  -7 -17   3    3.91    0.96 
   7 -17  -3    6.78    1.28 
   7  17  -3    6.30    1.02 
   5 -17  -3   -0.02    0.69 
  -5 -17   3    1.22    0.71 
   3 -17  -3    6.44    1.17 
  -3 -17   3    5.13    1.07 
   1 -17  -3    4.49    1.01 
  -1 -17   3    5.13    1.10 
  -1  17   3    5.18    1.05 
   1 -17   3   10.98    1.48 
  -1 -17  -3   13.52    1.49 
   1  17   3   10.78    1.47 
   3 -17   3    2.28    0.94 
   3  17   3   -0.55    0.59 
  -3 -17  -3    0.29    0.67 
   5  17   3    1.74    0.77 
   5 -17   3    1.72    0.91 
  -5 -17  -3    2.43    0.79 
   7  17   3    9.16    1.41 
   7 -17   3   16.43    1.93 
   9 -17   3   18.53    2.02 
   9  17   3   20.24    2.03 
  11  17   3    1.71    0.92 
  11 -17   3    2.85    1.08 
  13  17   3   11.40    1.56 
  13 -17   3    7.89    1.50 
  15 -17   3   28.61    2.34 
  15  17   3   24.49    2.12 
  17  17   3    0.91    0.88 
  17 -17   3    1.03    0.86 
  19  17   3   27.71    2.32 
  19 -17   3   27.93    2.42 
  21  17   3   24.44    2.16 
  21 -17   3   28.13    2.72 
  23  17   3   -1.51    0.78 
  23 -17   3    0.26    0.91 
  25 -17   3   10.83    1.82 
  25  17   3    8.73    1.55 
  27 -17   3   10.90    1.94 
  27  17   3   17.08    2.14 
  29 -17   3   -0.26    0.98 
  29  17   3    0.30    0.95 
  31  17   3   19.76    2.68 
  32  18  -3    1.82    1.00 
  30  18  -3   61.52    3.30 
  30 -18  -3   76.77    5.78 
  28  18  -3   -0.25    0.79 
  28 -18  -3    0.36    1.07 
  26 -18  -3    0.59    1.11 
  26  18  -3    0.49    0.85 
  24 -18  -3    9.15    1.75 
  24  18  -3   10.40    1.56 
  22 -18  -3    9.96    1.73 
  22  18  -3   10.54    1.54 
  20  18  -3    3.74    1.09 
  20 -18  -3    4.83    1.42 
  18  18  -3  121.56    4.07 
  18 -18  -3  136.18    4.86 
  16  18  -3    0.42    0.96 
  16 -18  -3    1.68    1.05 
  16  18  -3    1.77    0.83 
  14  18  -3    4.89    1.11 
  14 -18  -3    7.08    1.43 
  14  18  -3    4.71    1.02 
  12 -18  -3   21.56    2.13 
  12  18  -3   24.59    1.78 
  12  18  -3   21.02    1.76 
  10  18  -3   11.25    1.36 
  10  18  -3   11.34    1.52 
  10 -18  -3   11.22    1.61 
   8  18  -3    8.45    1.25 
   8  18  -3    8.48    1.33 
   8 -18  -3   10.39    1.56 
   6 -18  -3  255.51    6.29 
  -6 -18   3  241.13    5.94 
  -4 -18   3    1.11    0.74 
   4 -18  -3    0.69    0.78 
   2 -18  -3   11.05    1.51 
  -2 -18   3   15.54    1.73 
   0 -18   3   24.88    2.06 
   0 -18  -3   25.13    1.99 
   0  18   3   25.56    1.97 
   2  18   3    5.79    1.19 
  -2 -18  -3    7.21    1.19 
   2 -18   3    5.81    1.27 
   4  18   3   13.29    1.59 
   4 -18   3   13.49    1.71 
  -4 -18  -3   12.16    1.49 
   6 -18   3  146.79    4.77 
   6  18   3  146.25    4.68 
   8  18   3    5.70    1.24 
   8 -18   3    5.24    1.23 
  10  18   3   12.38    1.72 
  10 -18   3   15.82    1.96 
  12  18   3    2.99    1.08 
  12 -18   3    3.21    1.15 
  14 -18   3    0.40    0.78 
  14  18   3   -0.89    0.69 
  16  18   3    1.73    1.02 
  16 -18   3    6.05    1.46 
  18  18   3   86.18    3.82 
  18 -18   3   87.81    3.93 
  20 -18   3    4.05    1.28 
  20  18   3    3.58    1.29 
  22  18   3    3.74    1.18 
  22 -18   3    2.77    1.30 
  24  18   3    5.96    1.34 
  24 -18   3    9.17    1.67 
  26 -18   3   -0.08    1.05 
  26  18   3    0.21    0.94 
  28  18   3   -1.37    0.90 
  27 -19  -3   63.87    5.29 
  25 -19  -3    1.91    1.24 
  23 -19  -3    7.70    1.66 
  23  19  -3   10.38    2.10 
  21 -19  -3    0.55    0.98 
  21  19  -3    3.51    1.11 
  19  19  -3   -0.33    0.70 
  19 -19  -3    0.31    0.94 
  17  19  -3   16.56    1.89 
  17 -19  -3   18.80    2.27 
  15  19  -3   62.84    3.00 
  15 -19  -3   70.02    3.56 
  13 -19  -3    9.93    1.60 
  13  19  -3    9.89    1.48 
  11  19  -3    5.35    1.26 
  11  19  -3    5.83    1.21 
  11 -19  -3    4.32    1.27 
   9  19  -3   29.58    1.98 
   9 -19  -3   32.19    2.44 
   9  19  -3   30.14    2.15 
   7 -19  -3    8.82    1.48 
  -5 -19   3   11.63    1.57 
   5 -19  -3   11.49    1.65 
   3 -19  -3   65.81    3.12 
  -3 -19   3   65.66    3.09 
   1 -19  -3    6.56    1.31 
  -1 -19   3    7.12    1.31 
  -1 -19  -3   20.57    2.00 
   1 -19   3   22.31    2.21 
   1  19   3   17.49    1.95 
   3  19   3   41.87    2.63 
   3 -19   3   41.58    2.61 
  -3 -19  -3   43.48    2.42 
   5 -19   3   12.03    1.73 
   5  19   3    9.03    1.52 
   7 -19   3    4.72    1.27 
   7  19   3    4.18    1.15 
   9 -19   3   37.07    2.66 
   9  19   3   36.09    2.51 
  11  19   3   16.51    1.92 
  11 -19   3   15.37    1.99 
  13 -19   3    9.81    1.71 
  13  19   3   10.00    1.69 
  15  19   3   75.84    3.61 
  15 -19   3   72.20    3.69 
  17 -19   3   26.31    2.70 
  17  19   3   17.98    2.11 
  19  19   3    0.33    0.96 
  19 -19   3    1.14    1.07 
  21  19   3    0.91    0.88 
  21 -19   3    0.36    0.90 
  23  19   3    6.40    1.42 
  23 -19   3    6.56    1.54 
  25  19   3    4.90    1.39 
  22 -20  -3   -0.62    0.96 
  20 -20  -3   -1.69    0.90 
  18 -20  -3   24.55    2.65 
  16 -20  -3   -1.58    0.89 
  14 -20  -3    0.36    0.98 
  12 -20  -3   12.29    1.95 
  10 -20  -3   -2.00    0.73 
   8 -20  -3   -0.37    0.89 
   6 -20  -3   39.36    2.68 
  -4 -20   3   -0.98    0.74 
   4 -20  -3   -1.09    0.71 
   2 -20  -3    5.28    1.26 
  -2 -20   3    5.62    1.29 
   0 -20  -3   11.72    1.69 
   0 -20   3   13.13    1.76 
   2 -20   3    1.77    0.99 
   4  20   3    0.14    0.79 
   4 -20   3   -0.10    0.85 
   6 -20   3   32.12    2.50 
   6  20   3   33.89    2.47 
   8 -20   3    6.53    1.44 
   8  20   3    5.41    1.37 
  10 -20   3   -0.03    0.95 
  10  20   3   -1.22    0.68 
  12 -20   3   19.17    2.25 
  12  20   3   18.95    2.17 
  14 -20   3    0.41    1.01 
  14  20   3   -0.35    0.84 
  16 -20   3   -1.20    0.78 
  16  20   3   -0.90    0.78 
  18  20   3   18.05    2.22 
  18 -20   3   16.03    2.25 
  20  20   3    1.64    1.01 
  20 -20   3    0.32    1.04 
  22  20   3   -0.08    0.99 
  19 -21  -3    9.94    1.88 
  17 -21  -3    0.40    1.07 
  15 -21  -3    1.35    1.20 
  13 -21  -3   11.74    1.97 
  11 -21  -3   11.99    1.86 
   9 -21  -3    4.26    1.38 
   7 -21  -3    8.48    1.68 
   5 -21  -3    4.50    1.38 
   3 -21  -3    9.41    1.67 
  -3 -21   3   10.05    1.62 
   1 -21  -3    7.36    1.47 
  -1 -21   3    7.24    1.52 
   1 -21   3   12.36    1.86 
   3 -21   3   -0.40    0.82 
   5  21   3    7.30    1.48 
   5 -21   3    5.90    1.36 
   7  21   3   17.15    2.08 
   7 -21   3   13.01    1.92 
   9  21   3    8.30    1.56 
   9 -21   3    8.11    1.58 
  11  21   3    8.11    1.58 
  11 -21   3    6.17    1.54 
  13  21   3    4.01    1.23 
  13 -21   3    7.91    1.72 
  15  21   3    1.85    1.04 
  15 -21   3    1.46    1.14 
  17 -21   3   -0.04    1.42 
  17  21   3    1.87    1.19 
  19  21   3   15.50    2.13 
  14 -22  -3    2.09    1.17 
  12 -22  -3    3.09    1.16 
  10 -22  -3    4.22    1.31 
   8 -22  -3    6.28    1.53 
   6 -22  -3   31.06    2.63 
   4 -22  -3    5.30    1.33 
   2 -22  -3    6.23    1.37 
   0 -22   3    3.45    1.30 
   2 -22   3    5.35    1.36 
   4 -22   3    4.92    1.41 
   6  22   3   54.05    3.21 
   6 -22   3   48.56    3.09 
   8  22   3    8.66    1.63 
   8 -22   3    6.45    1.49 
  10  22   3    4.34    1.31 
  10 -22   3    3.99    1.23 
  12  22   3    2.66    1.25 
  12 -22   3    5.11    1.42 
  14  22   3    2.25    1.13 
   9 -23  -3   18.33    2.28 
   7 -23  -3    0.12    0.86 
   5 -23  -3    1.20    0.92 
   3 -23  -3    8.87    2.29 
   1 -23   3   -0.62    0.82 
   3 -23   3   22.47    2.49 
   5 -23   3   -0.24    0.82 
   7 -23   3    2.14    1.13 
   7  23   3    2.61    1.19 
   9  23   3    4.29    1.96 
  48   0  -4   -0.14    0.89 
  46   0  -4    9.40    1.64 
  44   0  -4    4.98    1.37 
  42   0  -4   41.47    2.72 
  40   0  -4    3.54    1.01 
  38   0  -4  219.30    5.85 
  36   0  -4   12.87    1.62 
  34   0  -4    5.56    1.04 
  32   0  -4   57.97    2.59 
  30   0  -4   74.47    2.79 
  28   0  -4   14.51    0.93 
  28   0  -4   15.20    1.29 
  26   0  -4  777.97   10.94 
  26   0  -4  805.45   12.24 
  24   0  -4    3.95    0.73 
  24   0  -4    3.24    0.54 
  22   0  -4    0.27    0.36 
 -20   0   4   13.44    0.82 
  20   0  -4   14.47    0.97 
  18   0  -4   37.39    1.44 
 -18   0   4   36.51    1.23 
 -16   0   4    8.31    0.60 
 -14   0   4 1714.87   21.57 
 -12   0   4  103.75    2.10 
 -10   0   4   10.95    0.62 
  -8   0   4  175.78    2.95 
   8   0  -4  172.73    2.78 
   6   0  -4    0.10    0.17 
  -6   0   4    0.26    0.21 
   4   0  -4    8.16    0.44 
   2   0  -4 1647.57   19.63 
  -2   0   4 1602.40   21.07 
  -2   0   4 1655.34   21.09 
   0   0   4    0.15    0.16 
   0   0   4    0.22    0.20 
   2   0   4   99.39    1.84 
   4   0   4 1865.63   25.04 
   4   0   4 1895.11   25.35 
   6   0   4    1.42    0.32 
   8   0   4    1.49    0.34 
   8   0   4    1.39    0.38 
  10   0   4  544.64    7.60 
  10   0   4  552.44    8.18 
  12   0   4  102.53    2.14 
  12   0   4  104.51    2.58 
  14   0   4    0.39    0.26 
  14   0   4   -0.15    0.27 
  16   0   4   54.17    1.98 
  16   0   4   51.33    1.48 
  18   0   4   28.55    1.52 
  18   0   4   28.96    1.13 
  20   0   4   82.39    2.03 
  20   0   4   86.26    2.82 
  22   0   4  136.59    3.78 
  22   0   4  143.59    2.88 
  24   0   4    3.96    0.88 
  24   0   4    2.99    0.55 
  26   0   4   -0.05    0.51 
  28   0   4  132.73    4.13 
  30   0   4   37.65    2.31 
  32   0   4   36.38    2.40 
  34   0   4    2.42    0.94 
  36   0   4    0.75    0.90 
  38   0   4    2.33    1.04 
  40   0   4   65.93    3.50 
  42   0   4   11.44    1.82 
  47   1  -4    1.77    0.96 
  47  -1  -4   -0.26    0.91 
  45  -1  -4    2.10    1.05 
  45   1  -4   -0.55    0.71 
  43   1  -4   11.68    1.77 
  43  -1  -4    8.71    1.64 
  41   1  -4   80.36    3.56 
  41  -1  -4   73.58    3.44 
  39  -1  -4    3.69    1.06 
  39   1  -4    1.63    0.90 
  37  -1  -4   21.61    1.91 
  37   1  -4   22.26    1.91 
  35   1  -4    2.77    0.81 
  35  -1  -4    2.33    0.78 
  33  -1  -4   -0.05    0.56 
  33   1  -4   -0.45    0.43 
  31   1  -4   21.39    1.61 
  31  -1  -4   19.46    1.60 
  29  -1  -4  326.88    6.55 
  29  -1  -4  322.13    5.52 
  29   1  -4  315.52    6.42 
  27   1  -4    0.50    0.32 
  27   1  -4    0.40    0.44 
  27  -1  -4    0.19    0.42 
  27  -1  -4    0.85    0.40 
  25  -1  -4   70.00    1.99 
  25   1  -4   70.25    2.37 
  25   1  -4   68.44    1.80 
  25  -1  -4   64.19    2.33 
  23   1  -4   29.30    1.45 
  23  -1  -4   28.85    1.48 
  23  -1  -4   29.40    1.26 
 -21  -1   4   13.53    0.76 
  21  -1  -4   13.99    1.01 
  21   1  -4   15.30    1.02 
  19   1  -4    2.24    0.48 
 -19   1   4    2.53    0.47 
 -19  -1   4    2.52    0.40 
 -17  -1   4 1812.82   22.74 
 -17   1   4 1820.10   22.99 
  17   1  -4 1809.75   23.56 
  15   1  -4    6.76    0.58 
 -15   1   4    7.36    0.59 
 -15  -1   4    7.92    0.55 
 -13   1   4   45.79    1.35 
  13   1  -4   48.60    1.32 
 -13  -1   4   46.98    1.26 
 -11   1   4  132.06    2.51 
  11   1  -4  131.74    2.34 
 -11  -1   4  129.24    2.39 
  -9  -1   4   40.02    1.12 
   9   1  -4   37.91    1.11 
  -9   1   4   36.99    1.14 
  -7  -1   4    6.67    0.48 
  -7   1   4    7.27    0.53 
   7   1  -4    6.41    0.46 
   7  -1  -4    6.52    0.41 
  -5   1   4  803.91   10.42 
   5   1  -4  799.70   10.02 
   5  -1  -4  793.34    9.74 
  -5  -1   4  768.79   10.34 
  -3  -1   4   15.21    0.69 
   3  -1  -4   14.39    0.49 
  -3   1   4   15.65    0.70 
  -3   1   4   14.66    0.55 
  -3  -1   4   14.97    0.34 
  -1  -1   4    0.41    0.13 
   1   1  -4    0.35    0.22 
  -1  -1   4    0.46    0.24 
  -1   1   4    0.39    0.18 
  -1   1   4    0.37    0.22 
   1  -1   4  386.99    5.13 
   1   1   4  379.97    5.36 
   1   1   4  379.75    5.36 
   1  -1   4  361.76    5.40 
   3   1   4    0.74    0.25 
   3   1   4    1.05    0.27 
   3  -1   4    0.71    0.25 
   3  -1   4    0.74    0.22 
   5  -1   4   17.65    0.76 
   5   1   4   18.86    0.84 
   5  -1   4   18.69    0.82 
   5   1   4   17.42    0.71 
   7   1   4 3178.95   43.52 
   7   1   4 3194.95   40.94 
   7  -1   4 3144.88   41.81 
   7  -1   4 3239.11   43.93 
   9   1   4    8.31    0.71 
   9  -1   4    9.24    0.69 
   9  -1   4    9.41    0.64 
   9   1   4   10.16    0.57 
  11  -1   4   19.49    0.91 
  11   1   4   19.11    1.03 
  11  -1   4   21.83    1.07 
  11   1   4   20.70    0.82 
  13   1   4  540.09    8.43 
  13  -1   4  545.71    8.36 
  13  -1   4  542.46    7.76 
  13   1   4  541.05    7.46 
  15   1   4    7.48    0.57 
  15   1   4    7.01    0.83 
  15  -1   4    6.50    0.64 
  15  -1   4    7.13    0.80 
  17  -1   4    0.83    0.36 
  17   1   4    0.76    0.30 
  17   1   4    0.75    0.45 
  17  -1   4    0.75    0.44 
  19   1   4 1149.98   14.78 
  19   1   4 1155.61   16.52 
  19  -1   4 1103.45   16.34 
  19  -1   4 1147.00   15.15 
  21   1   4    1.13    0.54 
  21  -1   4    1.34    0.44 
  21   1   4    1.38    0.37 
  21  -1   4    1.31    0.56 
  23   1   4    2.96    0.81 
  23   1   4    2.00    0.45 
  23  -1   4    2.15    0.54 
  23  -1   4    2.44    0.69 
  25  -1   4   46.56    2.29 
  25   1   4   50.86    2.36 
  25  -1   4   45.65    1.64 
  27   1   4   11.90    1.43 
  27  -1   4   12.42    1.48 
  29   1   4   -0.57    0.51 
  29  -1   4   -0.76    0.52 
  31  -1   4  347.23    7.67 
  31   1   4  331.90    7.54 
  33  -1   4    4.29    1.06 
  33   1   4    2.20    0.99 
  35   1   4    1.43    0.86 
  35  -1   4    1.73    0.86 
  37  -1   4   21.32    2.31 
  37   1   4   24.48    2.14 
  39  -1   4    6.10    1.36 
  39   1   4    5.27    1.43 
  41  -1   4    0.09    0.85 
  41   1   4   -0.18    0.73 
  43  -1   4   93.35    4.42 
  43   1   4   89.96    4.31 
  48  -2  -4    0.00    1.16 
  48   2  -4    2.32    1.20 
  46   2  -4   -0.16    0.70 
  46  -2  -4   -0.30    0.75 
  44  -2  -4    3.82    1.16 
  44   2  -4    4.93    1.27 
  42   2  -4    3.03    1.13 
  42  -2  -4    3.09    1.07 
  40   2  -4    0.43    0.72 
  40  -2  -4    0.61    0.78 
  38   2  -4   23.09    1.99 
  38  -2  -4   26.28    2.10 
  36  -2  -4   -0.25    0.64 
  36   2  -4    1.17    0.77 
  34   2  -4    3.25    0.85 
  34  -2  -4    2.85    0.88 
  32  -2  -4   24.82    1.81 
  32  -2  -4   27.97    2.03 
  32   2  -4   25.27    1.76 
  30  -2  -4    1.99    0.77 
  30   2  -4    1.72    0.70 
  30  -2  -4    1.78    0.56 
  28  -2  -4    0.32    0.37 
  28   2  -4    0.94    0.51 
  28  -2  -4    0.57    0.46 
  26   2  -4   12.77    0.76 
  26  -2  -4   13.97    1.22 
  26  -2  -4   12.31    0.96 
  26   2  -4   14.27    1.18 
  24  -2  -4    6.37    0.72 
  24   2  -4    4.86    0.78 
 -22  -2   4    0.27    0.24 
  22   2  -4    0.61    0.41 
  22  -2  -4    0.36    0.34 
  20   2  -4  157.90    3.40 
 -20  -2   4  157.65    2.81 
 -18   2   4    4.39    0.58 
 -18  -2   4    4.59    0.46 
  18   2  -4    3.48    0.54 
 -16  -2   4   11.78    0.63 
  16   2  -4   10.18    0.73 
 -16   2   4   11.16    0.75 
 -14   2   4  498.09    7.20 
  14   2  -4  487.11    7.10 
 -14  -2   4  496.36    6.85 
  12   2  -4    3.99    0.52 
 -12  -2   4    3.72    0.40 
  12   2  -4    3.65    0.41 
 -12   2   4    3.16    0.43 
  10   2  -4    0.18    0.18 
 -10   2   4   -0.06    0.19 
 -10  -2   4   -0.20    0.16 
  10   2  -4    0.19    0.26 
  -8  -2   4    3.05    0.39 
   8   2  -4    3.53    0.28 
   8   2  -4    3.25    0.42 
  -8   2   4    3.30    0.45 
   6  -2  -4    0.55    0.16 
  -6   2   4    0.87    0.28 
   6   2  -4    0.66    0.12 
  -6  -2   4    0.53    0.23 
   6   2  -4    0.73    0.22 
  -4   2   4    0.28    0.19 
  -4  -2   4    0.56    0.24 
   4   2  -4    0.37    0.22 
   4  -2  -4    0.45    0.13 
  -4   2   4    0.57    0.26 
  -2  -2   4   84.38    1.18 
  -2   2   4   85.55    1.79 
  -2  -2   4   92.62    1.88 
   2   2  -4   82.33    1.72 
  -2   2   4   83.95    1.69 
   0   2   4    7.46    0.49 
   0   2   4    7.19    0.50 
   0  -2   4    8.06    0.55 
   0  -2   4    7.91    0.33 
   2  -2   4    0.57    0.17 
   2   2   4    0.67    0.24 
   2  -2   4    0.44    0.29 
   2   2   4    0.59    0.26 
   4  -2   4    5.41    0.55 
   4  -2   4    6.24    0.44 
   4   2   4    6.28    0.57 
   4   2   4    6.91    0.49 
   6   2   4   40.62    1.10 
   6  -2   4   42.57    1.31 
   6  -2   4   41.83    1.21 
   6   2   4   43.58    1.38 
   8  -2   4    1.22    0.33 
   8  -2   4    1.23    0.36 
   8   2   4    1.11    0.27 
   8   2   4    1.06    0.34 
  10  -2   4  148.69    3.05 
  10   2   4  152.76    3.22 
  10   2   4  148.28    2.54 
  10  -2   4  152.78    2.96 
  12   2   4   13.67    0.64 
  12  -2   4   12.07    0.80 
  12   2   4   14.82    0.98 
  12  -2   4   13.74    0.91 
  14  -2   4    1.39    0.43 
  14   2   4    1.54    0.30 
  14  -2   4    2.27    0.44 
  14   2   4    1.43    0.45 
  16   2   4   19.08    0.78 
  16  -2   4   19.31    1.17 
  16   2   4   17.50    1.22 
  16  -2   4   22.48    1.09 
  18  -2   4   10.24    0.85 
  18  -2   4    8.38    0.96 
  18   2   4    8.82    1.02 
  18   2   4    9.57    0.59 
  20  -2   4    5.59    0.87 
  20  -2   4    8.10    0.85 
  20   2   4    6.55    0.57 
  20   2   4    5.75    0.88 
  22   2   4    9.75    1.21 
  22   2   4   10.97    0.66 
  22  -2   4   11.56    1.27 
  22  -2   4    9.87    0.94 
  24   2   4    9.53    1.26 
  24  -2   4   11.37    1.31 
  24  -2   4   10.24    1.00 
  26  -2   4    4.83    0.94 
  26  -2   4    5.99    0.79 
  26   2   4    5.13    0.97 
  28   2   4    0.26    0.57 
  28  -2   4    1.36    0.65 
  30  -2   4   10.10    1.44 
  30   2   4    8.52    1.40 
  32   2   4   -0.38    0.65 
  32  -2   4   -0.06    0.62 
  34  -2   4    1.27    0.84 
  34   2   4    0.01    0.70 
  36   2   4    1.92    1.05 
  36  -2   4    1.61    0.97 
  38   2   4    0.45    0.88 
  38  -2   4    0.49    0.84 
  40   2   4    4.93    1.30 
  40  -2   4    1.37    1.07 
  42  -2   4    4.05    1.12 
  42   2   4    2.31    1.18 
  47  -3  -4    0.15    0.79 
  47   3  -4   -0.97    0.70 
  45   3  -4   -0.16    0.83 
  45  -3  -4    0.46    0.82 
  43  -3  -4    2.47    1.07 
  43   3  -4    2.32    1.09 
  41   3  -4   23.07    2.04 
  41  -3  -4   21.99    2.22 
  39   3  -4    6.29    1.30 
  39  -3  -4    4.80    1.13 
  37  -3  -4    3.83    1.08 
  37   3  -4    5.78    1.13 
  35  -3  -4    1.47    0.79 
  35   3  -4    2.78    0.84 
  33  -3  -4    3.19    0.81 
  33  -3  -4    1.30    0.69 
  33   3  -4    2.89    0.81 
  31  -3  -4   -0.76    0.47 
  31  -3  -4    0.07    0.59 
  31   3  -4    0.24    0.60 
  29  -3  -4   59.37    2.51 
  29   3  -4   57.69    2.39 
  29  -3  -4   57.57    2.07 
  27   3  -4    2.09    0.62 
  27  -3  -4    0.67    0.43 
  25  -3  -4    8.97    0.93 
  25   3  -4    9.41    1.03 
  23   3  -4    2.42    0.58 
 -23  -3   4    2.78    0.39 
  21  -3  -4    0.62    0.39 
 -21  -3   4    0.86    0.26 
  21   3  -4    0.47    0.40 
 -19  -3   4   13.35    0.69 
  19   3  -4   14.06    0.95 
  19  -3  -4   14.57    0.95 
 -17   3   4  555.01    8.19 
  17   3  -4  554.70    8.21 
 -17  -3   4  559.47    7.57 
 -15  -3   4   17.97    0.77 
 -15   3   4   21.59    1.04 
  15   3  -4   20.81    0.93 
  13   3  -4    0.10    0.26 
 -13  -3   4    0.15    0.19 
 -13   3   4    0.25    0.26 
  13   3  -4    0.24    0.24 
 -11  -3   4   22.88    0.84 
 -11   3   4   23.96    1.03 
  11   3  -4   23.31    0.81 
  11   3  -4   25.39    1.04 
   9   3  -4    2.24    0.40 
  -9  -3   4    2.57    0.36 
  -9   3   4    2.48    0.41 
   9   3  -4    2.56    0.29 
  -7   3   4    4.95    0.51 
  -7  -3   4    5.70    0.50 
   7   3  -4    6.63    0.58 
   7   3  -4    6.88    0.33 
  -5   3   4  627.45    8.73 
  -5  -3   4  638.00    8.67 
   5   3  -4  648.77    7.95 
  -5   3   4  640.08    8.75 
   5  -3  -4  643.09    7.75 
  -3   3   4   18.43    0.79 
  -3  -3   4   18.02    0.82 
  -3   3   4   19.32    0.79 
  -1   3   4    1.70    0.32 
  -1  -3   4    1.92    0.36 
  -1   3   4    2.26    0.37 
   1   3  -4    1.43    0.33 
   1   3   4    2.94    0.46 
   1   3   4    3.77    0.47 
   1  -3   4    2.15    0.42 
   3   3   4    8.35    0.64 
   3   3   4    7.24    0.50 
   3  -3   4    7.58    0.64 
   5   3   4    0.01    0.19 
   5  -3   4   -0.08    0.22 
   5  -3   4   -0.08    0.17 
   5   3   4    0.05    0.27 
   7  -3   4  514.28    7.53 
   7  -3   4  524.06    7.66 
   7   3   4  532.71    7.13 
   7   3   4  533.27    7.91 
   9   3   4    0.62    0.36 
   9  -3   4    1.10    0.37 
   9  -3   4    0.69    0.32 
   9   3   4    0.36    0.21 
  11  -3   4   16.40    0.96 
  11   3   4   16.29    1.05 
  11   3   4   16.41    0.67 
  11  -3   4   16.93    0.96 
  13  -3   4    3.47    0.57 
  13   3   4    3.35    0.62 
  13   3   4    3.36    0.38 
  13  -3   4    3.96    0.61 
  15  -3   4   23.81    1.26 
  15   3   4   24.87    1.38 
  15   3   4   24.12    0.80 
  15  -3   4   23.60    1.19 
  17  -3   4   -0.08    0.34 
  17  -3   4    0.27    0.37 
  17   3   4    0.25    0.21 
  17   3   4    0.43    0.45 
  19  -3   4  229.09    4.93 
  19  -3   4  231.31    4.41 
  19   3   4  228.23    3.50 
  19   3   4  236.33    5.09 
  21   3   4    0.37    0.49 
  21   3   4    0.08    0.22 
  21  -3   4   -0.09    0.36 
  21  -3   4    0.07    0.45 
  23   3   4    1.22    0.66 
  23  -3   4   -0.23    0.47 
  23  -3   4    1.56    0.64 
  25  -3   4    0.88    0.58 
  25  -3   4    2.49    0.60 
  25   3   4    1.28    0.68 
  27  -3   4    8.29    1.20 
  27  -3   4    9.60    1.06 
  27   3   4   10.43    1.41 
  29   3   4    0.39    0.59 
  29  -3   4    0.46    0.63 
  31   3   4   73.50    3.28 
  31  -3   4   78.52    3.35 
  33  -3   4    0.01    0.60 
  33   3   4    0.83    0.80 
  35   3   4   10.69    1.69 
  35  -3   4    8.52    1.44 
  37   3   4    0.62    0.86 
  37  -3   4    0.10    0.86 
  39  -3   4   -0.92    0.85 
  39   3   4    0.68    0.91 
  41   3   4    0.47    0.89 
  41  -3   4    0.52    0.97 
  43   3   4   20.08    2.53 
  43  -3   4   16.92    2.26 
  48   4  -4    7.98    1.66 
  46   4  -4    2.86    1.09 
  46  -4  -4    5.66    1.53 
  44  -4  -4    7.88    1.62 
  44   4  -4   10.70    1.67 
  42  -4  -4   30.77    2.44 
  42   4  -4   29.03    2.35 
  40   4  -4   -0.78    0.62 
  40  -4  -4   -0.35    0.57 
  38   4  -4  240.01    6.15 
  38  -4  -4  239.81    6.38 
  36   4  -4    1.98    0.80 
  36  -4  -4    0.86    0.78 
  34  -4  -4    7.25    1.24 
  34  -4  -4    9.50    1.23 
  34   4  -4    8.48    1.28 
  32  -4  -4    0.68    0.56 
  32   4  -4    1.91    0.71 
  32  -4  -4    0.91    0.81 
  30   4  -4   75.11    2.82 
  30  -4  -4   70.42    2.45 
  30  -4  -4   75.66    2.96 
  28   4  -4   -0.21    0.38 
  28  -4  -4   -0.61    0.40 
  26  -4  -4  292.72    5.54 
  26   4  -4  304.34    5.88 
  24  -4  -4   26.05    1.37 
  24   4  -4   26.82    1.45 
  22   4  -4    6.53    0.81 
  22  -4  -4    8.73    0.93 
 -22  -4   4    7.71    0.51 
  20   4  -4    5.32    0.67 
 -20  -4   4    6.80    0.49 
  20  -4  -4    6.84    0.81 
  18   4  -4   90.17    2.30 
 -18  -4   4   84.70    1.80 
  18  -4  -4   91.08    2.41 
  16   4  -4    0.06    0.32 
  16   4  -4   -0.24    0.26 
 -16  -4   4    0.22    0.20 
 -14   4   4 1861.11   23.84 
  14   4  -4 1857.73   23.38 
 -14  -4   4 1826.28   23.76 
  14   4  -4 1893.30   23.79 
 -12  -4   4   40.23    1.16 
  12   4  -4   43.23    1.20 
  12   4  -4   43.10    1.44 
 -12   4   4   37.38    1.37 
 -10   4   4   10.66    0.75 
 -10  -4   4   10.35    0.61 
  10   4  -4   11.27    0.72 
  10   4  -4    9.73    0.54 
   8   4  -4   43.39    1.00 
  -8  -4   4   42.71    1.25 
  -8   4   4   44.22    1.42 
   6   4  -4  138.33    2.63 
  -6  -4   4  135.20    2.59 
  -6   4   4  134.84    2.68 
   6   4  -4  135.79    2.05 
  -4   4   4   19.39    0.88 
  -4   4   4   18.99    0.86 
  -4  -4   4   19.44    0.89 
   4   4  -4   19.74    0.51 
   2   4  -4 1191.36   15.30 
  -2   4   4 1221.90   15.60 
  -2  -4   4 1232.05   15.76 
  -2   4   4 1200.12   15.88 
   0   4   4    4.01    0.45 
   0   4   4    3.93    0.50 
   0  -4   4    3.17    0.45 
   0   4  -4    4.09    0.51 
   2  -4   4   81.88    2.03 
   2   4   4   81.42    1.99 
   2   4   4   81.61    1.77 
   4  -4   4    5.28    0.60 
   4   4   4    6.32    0.50 
   4   4   4    6.85    0.70 
   6   4   4    8.68    0.76 
   6   4   4    8.92    0.56 
   6  -4   4    9.34    0.75 
   8   4   4    9.11    0.78 
   8   4   4   10.49    0.58 
   8  -4   4   11.17    0.83 
  10  -4   4  927.85   12.78 
  10   4   4  925.16   11.90 
  10   4   4  936.27   13.23 
  12   4   4    0.46    0.35 
  12   4   4    0.40    0.21 
  12  -4   4    0.69    0.35 
  12  -4   4   -0.06    0.34 
  14  -4   4   -0.24    0.33 
  14   4   4    0.17    0.18 
  14  -4   4    0.33    0.36 
  14   4   4    0.19    0.36 
  16  -4   4  273.38    5.00 
  16   4   4  272.96    5.45 
  16  -4   4  277.70    5.31 
  16   4   4  275.80    3.94 
  18  -4   4    4.98    0.79 
  18   4   4    4.06    0.79 
  18  -4   4    6.41    0.82 
  18   4   4    5.30    0.43 
  20  -4   4   41.73    1.72 
  20   4   4   42.35    2.03 
  20  -4   4   45.50    2.04 
  22  -4   4  132.91    3.24 
  22  -4   4  121.00    3.56 
  22   4   4  128.32    3.78 
  24  -4   4    2.92    0.74 
  24  -4   4    6.47    0.88 
  24   4   4    5.34    1.02 
  26  -4   4    0.36    0.55 
  26  -4   4   -0.22    0.45 
  26   4   4   -0.04    0.47 
  28  -4   4   46.48    1.99 
  28  -4   4   49.39    2.51 
  28   4   4   52.55    2.62 
  30  -4   4   30.97    2.57 
  30  -4   4   30.48    2.17 
  30   4   4   27.94    2.05 
  32   4   4   40.57    2.58 
  32  -4   4   37.37    2.44 
  34  -4   4   24.20    2.12 
  34   4   4   26.89    2.15 
  36   4   4    0.03    0.76 
  36  -4   4   -0.61    0.65 
  38   4   4    4.13    1.24 
  38  -4   4    2.92    1.16 
  40   4   4   44.77    3.08 
  40  -4   4   38.89    2.89 
  42  -4   4   11.88    1.93 
  42   4   4    7.64    1.61 
  47   5  -4   -0.80    0.76 
  45  -5  -4    0.72    0.96 
  45   5  -4    0.08    0.81 
  43  -5  -4   13.28    1.90 
  43   5  -4   16.34    2.02 
  41   5  -4   65.21    3.23 
  41  -5  -4   70.99    3.53 
  39   5  -4    1.09    0.84 
  39  -5  -4    1.84    0.88 
  37   5  -4   35.51    2.29 
  37  -5  -4   37.60    2.51 
  35  -5  -4    2.86    0.88 
  35  -5  -4    2.21    0.88 
  35   5  -4    4.50    1.05 
  33  -5  -4    1.84    0.76 
  33  -5  -4    1.93    0.73 
  33   5  -4    2.09    0.77 
  31  -5  -4    3.77    0.85 
  31   5  -4    5.14    0.99 
  29  -5  -4  384.58    6.95 
  29   5  -4  383.78    7.32 
  27  -5  -4    5.75    0.88 
  27   5  -4    5.08    0.85 
  25  -5  -4   52.89    2.07 
  25   5  -4   50.77    2.07 
  23   5  -4   32.68    1.56 
  23  -5  -4   32.67    1.59 
 -21  -5   4    5.92    0.47 
  21   5  -4    6.76    0.79 
  21  -5  -4    6.92    0.82 
  21   5  -4    6.62    0.90 
 -19  -5   4   23.19    0.82 
  19   5  -4   22.64    1.17 
  19  -5  -4   24.67    1.32 
  19   5  -4   24.13    1.30 
  17  -5  -4 1436.31   18.92 
 -17  -5   4 1409.49   17.80 
  17   5  -4 1425.41   18.77 
  17   5  -4 1382.39   18.51 
  15  -5  -4   19.85    1.14 
  15   5  -4   17.73    1.05 
  15   5  -4   17.99    0.92 
 -15  -5   4   19.02    0.79 
  13   5  -4   12.94    0.74 
  13   5  -4   13.98    0.94 
 -13  -5   4   13.12    0.70 
 -11  -5   4  190.84    3.30 
  11   5  -4  197.59    3.27 
  11   5  -4  195.14    3.64 
 -11   5   4  196.70    3.72 
  -9   5   4   19.58    1.02 
   9   5  -4   18.43    0.95 
  -9  -5   4   21.80    0.90 
   9   5  -4   20.14    0.74 
   7   5  -4   12.36    0.53 
  -7   5   4   14.84    0.86 
  -7  -5   4   12.10    0.74 
   7   5  -4   12.37    0.78 
  -5   5   4 2841.34   38.65 
   5   5  -4 2857.87   36.53 
  -5  -5   4 2817.74   38.98 
   5   5  -4 2822.56   35.93 
  -5   5   4 2818.06   37.09 
  -3   5   4    3.80    0.52 
  -3  -5   4    3.18    0.48 
   3   5  -4    2.41    0.43 
  -1  -5   4    0.36    0.31 
  -1   5   4   -0.06    0.24 
  -1   5   4    0.51    0.26 
   1   5  -4    0.20    0.33 
   1   5   4  541.26    7.58 
   1  -5   4  547.61    7.96 
   1   5   4  529.97    7.96 
   1   5   4  541.68    6.59 
   3   5   4    0.28    0.24 
   3   5   4    0.23    0.28 
   3  -5   4    0.24    0.32 
   5   5   4    0.45    0.25 
   5   5   4    0.23    0.32 
   5  -5   4    0.59    0.35 
   7  -5   4 1880.45   24.34 
   7   5   4 1854.97   23.47 
   7   5   4 1935.10   24.85 
   9   5   4   19.52    0.77 
   9   5   4   17.46    1.09 
   9  -5   4   19.97    1.13 
  11   5   4   10.23    0.55 
  11   5   4   10.41    1.03 
  11  -5   4    9.65    0.94 
  13   5   4  135.31    2.29 
  13   5   4  135.48    3.39 
  13  -5   4  136.79    3.19 
  15  -5   4    2.95    0.62 
  15  -5   4    0.35    0.49 
  15   5   4    2.04    0.63 
  15   5   4    1.75    0.28 
  17   5   4   -0.22    0.16 
  17  -5   4   -0.07    0.42 
  17  -5   4   -0.10    0.35 
  17   5   4   -0.59    0.46 
  19  -5   4 1513.13   20.57 
  19  -5   4 1555.09   21.34 
  19   5   4 1517.25   21.54 
  21   5   4    4.09    0.95 
  21  -5   4    2.72    0.70 
  21  -5   4    2.30    0.67 
  23  -5   4    3.75    0.81 
  23   5   4    4.88    1.00 
  23  -5   4    4.13    0.82 
  25   5   4  188.53    4.96 
  25  -5   4  190.56    4.31 
  25  -5   4  182.05    4.81 
  27  -5   4    2.24    0.81 
  27   5   4    2.89    0.85 
  27  -5   4    3.31    0.79 
  29  -5   4   -0.17    0.58 
  29  -5   4   -0.24    0.46 
  29   5   4   -0.49    0.67 
  31   5   4  362.33    8.01 
  31  -5   4  348.72    7.81 
  31  -5   4  344.77    8.19 
  33   5   4    1.39    0.84 
  33  -5   4    0.42    0.84 
  35   5   4   -0.20    0.86 
  35  -5   4    1.91    0.95 
  37  -5   4   19.52    2.20 
  37   5   4   20.88    2.28 
  39  -5   4   12.19    1.84 
  39   5   4   11.57    1.95 
  41  -5   4    0.34    0.84 
  41   5   4    0.09    0.99 
  48   6  -4    0.55    1.14 
  46  -6  -4    0.57    0.93 
  46   6  -4   -1.45    0.62 
  44  -6  -4   21.02    2.34 
  44   6  -4   26.06    2.30 
  42   6  -4    0.03    0.78 
  42  -6  -4    1.00    0.91 
  40   6  -4    0.47    0.78 
  40  -6  -4   -0.18    0.68 
  38  -6  -4   99.02    4.00 
  38   6  -4   84.92    3.51 
  36  -6  -4    6.65    1.27 
  36   6  -4    8.54    1.32 
  36  -6  -4    8.08    1.47 
  34  -6  -4    1.52    0.76 
  34  -6  -4    1.28    0.72 
  34   6  -4    0.21    0.59 
  32  -6  -4   69.76    2.68 
  32   6  -4   72.53    2.88 
  30   6  -4   11.85    1.30 
  30  -6  -4   13.42    1.35 
  28   6  -4    4.24    0.85 
  28  -6  -4    3.60    0.79 
  26   6  -4  165.09    4.21 
  26   6  -4  171.14    4.12 
  26  -6  -4  175.28    4.12 
  24  -6  -4    0.67    0.55 
  24   6  -4    1.19    0.63 
  24   6  -4    1.04    0.52 
  22  -6  -4    4.50    0.79 
  22   6  -4    5.25    0.83 
  22   6  -4    4.41    0.70 
  20  -6  -4  105.64    2.88 
 -20  -6   4  102.39    1.96 
  20   6  -4  105.06    2.89 
  20   6  -4  102.89    2.68 
  18   6  -4    4.01    0.61 
  18  -6  -4    3.79    0.69 
  18   6  -4    3.68    0.71 
 -18  -6   4    3.59    0.41 
  16   6  -4    1.75    0.43 
 -16  -6   4    1.54    0.31 
  16   6  -4    1.02    0.42 
  16  -6  -4    1.10    0.47 
  14   6  -4  314.30    5.45 
 -14  -6   4  321.82    4.90 
  14   6  -4  322.99    5.18 
  14  -6  -4  325.66    5.66 
 -12  -6   4    3.21    0.46 
  12   6  -4    2.37    0.54 
  12  -6  -4    1.65    0.49 
  12   6  -4    1.95    0.40 
  10   6  -4    1.65    0.43 
 -10  -6   4    1.68    0.38 
  10   6  -4    1.94    0.34 
   8   6  -4   77.19    2.03 
  -8  -6   4   76.02    1.91 
   8   6  -4   73.94    1.60 
  -8   6   4   78.40    2.09 
  -6   6   4    0.02    0.29 
  -6   6   4    0.25    0.32 
   6   6  -4    0.23    0.30 
  -6  -6   4    1.00    0.33 
   6   6  -4    0.38    0.20 
   4   6  -4   50.41    1.56 
  -4   6   4   49.91    1.56 
  -4   6   4   49.50    1.59 
  -4  -6   4   49.99    1.58 
   4   6  -4   48.67    1.15 
  -2   6   4  828.18   11.22 
   2   6  -4  838.90   11.11 
  -2  -6   4  810.42   11.40 
  -2   6   4  815.24   11.55 
   0  -6   4   25.91    1.19 
   0   6   4   28.04    0.57 
   0   6   4   25.41    1.06 
   0   6   4   27.91    1.20 
   0   6  -4   25.97    1.17 
   2  -6   4    0.89    0.37 
   2   6   4    0.80    0.36 
   2   6   4    1.44    0.37 
   2   6   4    1.29    0.20 
   4   6   4    4.06    0.50 
   4   6   4    5.89    0.73 
   4  -6   4    2.91    0.53 
   6   6   4   26.33    1.31 
   6  -6   4   25.50    1.24 
   6   6   4   28.17    0.99 
   8   6   4    7.73    0.56 
   8  -6   4    6.32    0.73 
   8   6   4    7.27    0.87 
  10   6   4   65.61    1.51 
  10  -6   4   68.38    2.16 
  10   6   4   67.60    2.21 
  12   6   4   11.38    1.01 
  12  -6   4   12.48    1.04 
  12   6   4   12.32    0.61 
  14  -6   4    0.45    0.44 
  14   6   4    0.64    0.24 
  14   6   4    0.00    0.42 
  16  -6   4    7.70    0.94 
  16   6   4    7.72    0.46 
  16   6   4    8.31    1.06 
  18  -6   4   71.16    2.41 
  18   6   4   72.95    2.68 
  18  -6   4   71.65    2.52 
  20  -6   4    0.00    0.49 
  20  -6   4    0.00    0.49 
  20   6   4    1.19    0.64 
  22  -6   4    4.07    0.80 
  22  -6   4    5.50    0.90 
  22   6   4    2.48    0.81 
  24  -6   4   34.78    1.99 
  24   6   4   37.53    2.14 
  24  -6   4   33.32    1.78 
  26  -6   4    3.36    0.83 
  26  -6   4    2.87    0.82 
  26   6   4    3.99    1.00 
  28  -6   4   12.36    1.49 
  28  -6   4   13.66    1.41 
  28   6   4   12.81    1.59 
  30   6   4   20.09    2.03 
  30  -6   4   22.75    1.94 
  30  -6   4   19.03    1.58 
  32  -6   4    7.65    1.72 
  32  -6   4    7.58    1.32 
  32   6   4    6.21    1.26 
  34  -6   4    3.24    1.12 
  34   6   4    3.53    1.19 
  36  -6   4   17.98    2.10 
  36   6   4   15.41    1.99 
  38  -6   4   -0.17    0.89 
  38   6   4    1.90    1.04 
  40   6   4   23.16    2.51 
  40  -6   4   26.11    2.35 
  42   6   4    6.03    1.56 
  42  -6   4    8.59    1.84 
  45   7  -4    1.43    0.93 
  45  -7  -4    1.98    1.20 
  45   7  -4    0.66    1.36 
  43  -7  -4    4.84    1.34 
  43   7  -4    7.05    1.42 
  43   7  -4    5.82    1.37 
  41  -7  -4    0.24    0.86 
  41   7  -4    1.13    0.88 
  41   7  -4    0.93    0.83 
  39   7  -4    1.62    0.95 
  39   7  -4    3.20    1.05 
  39  -7  -4    1.15    0.89 
  37  -7  -4    0.26    0.83 
  37  -7  -4    1.19    0.98 
  37   7  -4    1.84    0.81 
  37   7  -4    1.33    0.82 
  35   7  -4    3.93    1.00 
  35   7  -4    4.50    1.01 
  35  -7  -4    6.63    1.12 
  33   7  -4    0.55    0.63 
  33   7  -4   -0.30    0.58 
  33  -7  -4   -0.54    0.57 
  31   7  -4   30.81    2.02 
  31   7  -4   27.70    1.84 
  31  -7  -4   26.46    1.87 
  29  -7  -4    0.33    0.58 
  29   7  -4   -0.34    0.51 
  29   7  -4    1.29    0.69 
  27   7  -4   23.14    1.51 
  27   7  -4   24.66    1.65 
  27  -7  -4   23.59    1.56 
  25  -7  -4    0.60    0.57 
  25   7  -4    0.42    0.48 
  25   7  -4    0.65    0.59 
  23   7  -4   75.41    2.42 
  23  -7  -4   71.24    2.53 
  23   7  -4   70.91    2.52 
  21   7  -4    1.90    0.56 
  21  -7  -4    3.33    0.72 
  21   7  -4    2.20    0.65 
 -19  -7   4   24.25    0.88 
  19   7  -4   26.70    1.29 
  19   7  -4   25.04    1.40 
  19  -7  -4   19.86    1.42 
  17   7  -4    5.76    0.72 
  17  -7  -4    7.74    0.96 
  17   7  -4    6.16    0.80 
 -17  -7   4    7.08    0.57 
  15  -7  -4   24.82    1.38 
  15   7  -4   26.85    1.36 
 -15  -7   4   28.06    1.05 
  15   7  -4   28.41    1.21 
  13   7  -4    8.24    0.70 
  13  -7  -4    7.31    0.91 
  13   7  -4    7.72    0.86 
 -13  -7   4    7.79    0.70 
  11  -7  -4  484.73    7.74 
 -11  -7   4  475.44    7.15 
  11   7  -4  495.56    7.11 
  11   7  -4  494.85    7.50 
   9  -7  -4   10.05    0.95 
   9   7  -4   11.01    0.66 
  -9  -7   4   11.08    0.79 
   9   7  -4   11.79    0.89 
  -7  -7   4   10.09    0.77 
   7   7  -4    8.92    0.59 
   7   7  -4    9.46    0.81 
   7  -7  -4    9.54    0.81 
  -5   7   4    1.67    0.45 
   5   7  -4    2.29    0.49 
   5   7  -4    2.19    0.35 
  -5  -7   4    4.72    0.65 
  -3  -7   4    6.61    0.74 
  -3   7   4    7.46    0.77 
  -3   7   4    6.37    0.69 
   3   7  -4    7.14    0.71 
  -1   7   4   41.76    1.55 
   1   7  -4   39.30    1.47 
  -1  -7   4   38.64    1.51 
  -1   7   4   39.44    1.38 
   1   7   4  412.01    6.31 
   1   7   4  421.97    5.35 
   1   7   4  406.82    6.74 
   1  -7   4  426.00    6.77 
   3   7   4   50.50    1.49 
   3  -7   4   49.44    1.77 
   3   7   4   47.86    1.08 
   3   7   4   52.09    1.80 
   5   7   4    0.42    0.21 
   5  -7   4    0.11    0.37 
   5   7   4   -0.08    0.31 
   5   7   4    0.05    0.25 
   7   7   4   12.19    0.73 
   7  -7   4   11.81    1.00 
   7   7   4   12.74    0.98 
   9  -7   4   -0.23    0.33 
   9   7   4   -0.09    0.31 
   9   7   4   -0.20    0.21 
  11   7   4    0.17    0.40 
  11   7   4    0.14    0.25 
  11  -7   4   -0.12    0.44 
  13  -7   4  282.31    5.43 
  13   7   4  283.89    5.66 
  15  -7   4   13.12    1.16 
  15   7   4   12.99    1.31 
  17   7   4    2.49    0.70 
  17  -7   4    3.07    0.72 
  19  -7   4   13.69    1.31 
  19   7   4   11.44    1.36 
  21   7   4    0.47    0.59 
  21  -7   4   -0.55    0.44 
  21  -7   4    0.42    0.49 
  23   7   4    9.45    1.27 
  23  -7   4   14.41    1.49 
  23  -7   4   10.99    1.26 
  25  -7   4   63.76    2.56 
  25  -7   4   60.28    2.66 
  25   7   4   65.51    2.89 
  27  -7   4    1.03    0.66 
  27  -7   4    1.40    0.69 
  27   7   4    1.87    0.76 
  29  -7   4   -0.93    0.55 
  29   7   4    0.36    0.67 
  29  -7   4    0.19    0.51 
  31  -7   4   26.24    1.85 
  31  -7   4   24.24    2.02 
  31   7   4   27.51    2.21 
  33   7   4    1.89    0.98 
  33  -7   4    1.44    0.94 
  35  -7   4    2.21    0.96 
  35   7   4    1.35    1.00 
  37   7   4   36.92    2.66 
  37  -7   4   37.83    2.70 
  39  -7   4    0.91    0.96 
  39   7   4   -0.91    0.77 
  41   7   4   -0.66    0.86 
  41  -7   4    0.31    0.96 
  44  -8  -4   12.74    1.97 
  44   8  -4   13.28    1.93 
  44   8  -4   15.32    2.04 
  42   8  -4   20.57    2.25 
  42   8  -4   17.81    2.05 
  42  -8  -4   18.16    2.19 
  40   8  -4   -0.64    0.61 
  40   8  -4    0.04    0.73 
  40  -8  -4    0.05    0.80 
  38   8  -4   24.36    2.32 
  38  -8  -4   31.77    2.44 
  38   8  -4   28.10    2.14 
  36   8  -4    6.75    1.23 
  36  -8  -4    6.39    1.19 
  36   8  -4    6.19    1.14 
  34  -8  -4    0.27    0.63 
  34   8  -4    0.83    0.73 
  34   8  -4    0.11    0.59 
  32   8  -4   34.09    2.13 
  32  -8  -4   29.11    1.98 
  32   8  -4   30.39    1.94 
  30   8  -4   55.46    2.59 
  30  -8  -4   47.44    2.40 
  30   8  -4   50.32    2.41 
  28  -8  -4    0.23    0.58 
  28   8  -4    0.56    0.53 
  28   8  -4    0.45    0.53 
  26   8  -4   75.19    2.64 
  26  -8  -4   79.16    2.83 
  26   8  -4   74.11    2.76 
  24   8  -4   16.17    1.26 
  24  -8  -4   15.56    1.38 
  24   8  -4   15.69    1.35 
  22   8  -4    9.73    1.05 
  22  -8  -4   10.03    1.20 
  22   8  -4   10.46    1.14 
  20  -8  -4  103.79    3.11 
  20   8  -4   96.45    2.91 
  20   8  -4  109.02    2.86 
 -18  -8   4   96.31    2.06 
  18   8  -4   94.16    2.77 
  18  -8  -4   90.95    2.85 
  18   8  -4  100.25    2.62 
  16   8  -4   20.74    1.29 
  16   8  -4   21.49    1.15 
  16  -8  -4   21.70    1.38 
 -16  -8   4   21.01    0.95 
  14   8  -4  312.48    5.27 
  14  -8  -4  319.21    5.86 
 -14  -8   4  317.40    5.09 
  14   8  -4  310.76    5.61 
  12  -8  -4   46.91    1.85 
  12   8  -4   51.19    1.56 
  12   8  -4   50.06    1.82 
 -12  -8   4   46.75    1.55 
  10   8  -4   98.78    2.23 
 -10  -8   4  103.22    2.46 
  10   8  -4  104.84    2.65 
  10  -8  -4   96.23    2.69 
  -8  -8   4  112.99    2.68 
   8   8  -4  114.87    2.78 
   8  -8  -4  118.56    2.93 
   8   8  -4  112.52    2.36 
   6   8  -4   91.94    2.41 
   6   8  -4   89.24    1.99 
  -6   8   4   90.00    2.51 
  -6  -8   4   90.22    2.39 
   6  -8  -4   90.10    2.48 
   4   8  -4    0.39    0.27 
   4  -8  -4    0.26    0.42 
  -4  -8   4    0.06    0.36 
   4   8  -4   -0.09    0.34 
  -4   8   4    0.26    0.33 
   2  -8  -4  218.26    4.12 
   2   8  -4  215.82    4.13 
  -2  -8   4  215.59    4.23 
  -2   8   4  219.69    4.33 
   0  -8  -4   32.08    1.31 
   0   8   4   33.01    0.83 
   0   8   4   32.65    1.45 
   0  -8   4   29.90    1.40 
   2  -8   4  100.29    2.69 
   2   8   4   96.25    2.63 
  -2  -8  -4   98.10    2.35 
   2   8   4   97.32    1.74 
   4   8   4  183.57    2.90 
   4   8   4  187.20    4.00 
   4  -8   4  182.62    3.97 
   6   8   4   26.44    1.39 
   6   8   4   25.17    0.91 
  -6  -8  -4   24.64    1.07 
   6  -8   4   24.80    1.36 
   8   8   4  131.26    2.51 
  -8  -8  -4  125.91    2.59 
   8  -8   4  130.20    3.30 
   8   8   4  129.52    3.31 
 -10  -8  -4  220.46    3.71 
  10   8   4  216.95    4.70 
  10  -8   4  218.93    4.63 
  12   8   4   22.23    1.48 
 -12  -8  -4   21.29    0.89 
  12  -8   4   20.68    1.35 
  14   8   4    6.46    0.97 
  14  -8   4    4.11    0.76 
 -14  -8  -4    5.62    0.50 
  16   8   4   91.98    3.06 
  16  -8   4   92.66    2.93 
  18  -8   4    0.26    0.55 
  18   8   4   -0.45    0.42 
  20   8   4   35.23    2.08 
  20  -8   4   37.04    1.95 
  22   8   4  143.98    4.25 
  22  -8   4  139.00    3.90 
  24  -8   4   19.96    1.59 
  24   8   4   17.89    1.85 
  24  -8   4   16.96    1.53 
  26  -8   4    2.59    0.94 
  26  -8   4    2.73    0.85 
  26   8   4    1.40    0.81 
  28   8   4   38.24    2.42 
  28  -8   4   40.33    2.19 
  28  -8   4   40.00    2.36 
  30  -8   4    1.04    0.83 
  30   8   4    0.54    0.85 
  30  -8   4    1.16    0.77 
  32  -8   4   40.61    2.56 
  32   8   4   40.90    2.62 
  32  -8   4   40.79    2.34 
  34  -8   4   30.58    2.36 
  34   8   4   26.22    2.55 
  36  -8   4    5.48    1.40 
  36   8   4    5.74    1.44 
  38   8   4    0.97    0.93 
  38  -8   4    0.47    0.94 
  40  -8   4   14.91    2.06 
  40   8   4   16.56    2.27 
  43  -9  -4    0.68    1.02 
  43   9  -4    1.75    1.03 
  41  -9  -4   71.14    3.77 
  41   9  -4   64.88    3.36 
  41   9  -4   71.62    3.50 
  39  -9  -4    2.02    1.08 
  39   9  -4    0.99    0.95 
  39   9  -4    1.29    0.88 
  37   9  -4    6.96    1.30 
  37  -9  -4    6.83    1.32 
  37   9  -4    7.71    1.42 
  35   9  -4   -0.31    0.58 
  35   9  -4   -0.06    0.79 
  35  -9  -4   -0.09    0.72 
  33   9  -4   -0.67    0.57 
  33  -9  -4    0.45    0.65 
  33   9  -4    0.54    0.65 
  31   9  -4   -0.34    0.51 
  31   9  -4    0.45    0.73 
  31  -9  -4    0.03    0.66 
  29   9  -4  220.72    5.26 
  29   9  -4  219.31    5.38 
  29  -9  -4  218.61    5.36 
  27   9  -4    4.72    0.97 
  27  -9  -4    4.57    0.98 
  27   9  -4    2.11    0.75 
  25   9  -4   12.82    1.31 
  25  -9  -4   12.62    1.37 
  25   9  -4   15.59    1.54 
  23   9  -4   12.22    1.37 
  23   9  -4   10.48    1.14 
  23  -9  -4    9.28    1.20 
  21   9  -4    4.38    0.79 
  21  -9  -4    3.38    0.82 
  21   9  -4    5.80    0.90 
  19   9  -4    1.89    0.57 
  19  -9  -4    1.93    0.72 
  19   9  -4    1.99    0.64 
  17   9  -4  972.72   13.92 
  17  -9  -4  955.52   14.35 
  17   9  -4  992.50   13.84 
 -17  -9   4  977.10   13.00 
 -15  -9   4    3.66    0.55 
  15  -9  -4    3.56    0.74 
  15   9  -4    4.24    0.78 
  15   9  -4    3.71    0.64 
  13   9  -4    0.33    0.36 
  13   9  -4    0.14    0.42 
 -13  -9   4    1.10    0.38 
  13  -9  -4    0.32    0.47 
  11  -9  -4   21.38    1.35 
  11   9  -4   22.99    1.31 
  11   9  -4   25.40    1.14 
 -11  -9   4   23.04    1.16 
   9  -9  -4   -0.02    0.36 
  -9  -9   4   -0.02    0.32 
   9   9  -4   -0.23    0.27 
   9   9  -4    0.31    0.36 
   7   9  -4    0.00    0.31 
   7  -9  -4    0.59    0.42 
  -7  -9   4   -0.16    0.34 
   7   9  -4   -0.40    0.36 
   5   9  -4  835.59   11.74 
  -5   9   4  845.33   12.34 
  -5  -9   4  842.50   12.04 
   5  -9  -4  829.54   12.06 
   5   9  -4  834.58   11.45 
  -3   9   4    0.55    0.42 
   3  -9  -4    1.44    0.47 
   3   9  -4    0.76    0.48 
  -3  -9   4    1.17    0.47 
   1   9  -4    2.70    0.62 
  -1  -9   4    1.94    0.57 
   1  -9  -4    3.13    0.59 
  -1   9   4    2.62    0.59 
  -1  -9  -4    2.80    0.55 
   1   9   4    3.82    0.40 
   1  -9   4    3.02    0.66 
   1   9   4    3.94    0.70 
   3   9   4    0.65    0.27 
  -3  -9  -4   -0.15    0.31 
   3   9   4    0.59    0.44 
   3  -9   4   -0.13    0.45 
  -5  -9  -4    6.95    0.75 
   5   9   4    7.26    0.99 
   5   9   4    7.08    0.55 
   5  -9   4    8.70    0.98 
   7  -9   4 1799.44   24.13 
   7   9   4 1809.86   24.47 
   7   9   4 1789.82   22.16 
  -7  -9  -4 1814.64   23.07 
   9  -9   4    0.57    0.51 
  -9  -9  -4   -0.17    0.29 
   9   9   4    0.73    0.34 
   9   9   4   -0.18    0.52 
 -11  -9  -4   61.38    1.64 
  11   9   4   58.29    1.71 
  11   9   4   58.71    2.30 
  11  -9   4   57.83    2.27 
  13  -9   4   55.06    2.26 
 -13  -9  -4   53.71    1.46 
  13   9   4   50.29    2.18 
  15  -9   4    0.24    0.56 
  15   9   4    0.98    0.60 
  17   9   4    3.09    0.82 
  17  -9   4    3.41    0.89 
  19  -9   4  539.15    9.30 
  19   9   4  528.38    9.60 
  21   9   4    0.00    0.69 
  21  -9   4    1.18    0.68 
  23   9   4    4.31    1.03 
  23  -9   4    6.05    1.12 
  25  -9   4   12.14    1.49 
  25  -9   4   12.80    1.55 
  25   9   4   12.08    1.57 
  27  -9   4    3.85    1.03 
  27   9   4    3.14    1.00 
  27  -9   4    3.39    0.99 
  29  -9   4    1.19    0.79 
  29  -9   4    0.44    0.69 
  29   9   4    2.28    0.99 
  31  -9   4  174.22    4.86 
  31  -9   4  170.74    5.28 
  31   9   4  177.30    5.48 
  33  -9   4    1.29    0.88 
  33   9   4   -0.12    0.75 
  33  -9   4    0.35    0.77 
  35  -9   4    8.34    1.57 
  35   9   4   10.39    1.76 
  37   9   4    1.94    1.17 
  37  -9   4    3.69    1.22 
  39  -9   4    5.68    1.32 
  39   9   4    5.39    1.42 
  42 -10  -4    7.67    1.57 
  42  10  -4    8.80    1.63 
  40 -10  -4   -0.56    0.73 
  40  10  -4    1.37    0.91 
  38  10  -4   91.82    3.83 
  38 -10  -4   91.02    3.74 
  38  10  -4   91.22    3.70 
  36  10  -4   11.14    1.60 
  36 -10  -4   10.53    1.62 
  36  10  -4   11.43    1.52 
  34  10  -4    0.13    0.66 
  34  10  -4   -0.32    0.62 
  34 -10  -4    0.21    0.81 
  32  10  -4   29.53    2.00 
  32 -10  -4   29.51    2.09 
  32  10  -4   26.91    1.94 
  30 -10  -4   39.52    2.36 
  30  10  -4   47.06    2.44 
  30  10  -4   40.79    2.23 
  28  10  -4    1.63    0.81 
  28 -10  -4    1.84    0.80 
  28  10  -4    2.19    0.81 
  26  10  -4  235.37    5.28 
  26  10  -4  226.58    5.39 
  26 -10  -4  242.00    5.66 
  24  10  -4   24.32    1.69 
  24  10  -4   25.22    1.57 
  24 -10  -4   22.02    1.77 
  22  10  -4    3.13    0.78 
  22  10  -4    3.04    0.72 
  22 -10  -4    3.22    0.82 
  20  10  -4   36.92    1.89 
  20 -10  -4   40.24    2.03 
  20  10  -4   41.67    1.82 
  18  10  -4    9.44    0.99 
  18 -10  -4    7.10    1.02 
  18  10  -4    9.28    1.13 
  16  10  -4    4.63    0.76 
 -16 -10   4    6.37    0.72 
  16  10  -4    5.70    0.93 
  16 -10  -4    4.87    0.90 
  14 -10  -4  481.85    8.32 
 -14 -10   4  471.28    7.38 
  14  10  -4  468.35    7.85 
  14  10  -4  489.04    7.61 
  12  10  -4    8.42    0.85 
  12 -10  -4   10.30    1.12 
  12  10  -4   10.20    1.08 
 -12 -10   4    9.50    0.93 
  10 -10  -4    0.93    0.52 
  10  10  -4    0.94    0.41 
  10  10  -4    0.65    0.47 
 -10 -10   4    0.81    0.43 
   8 -10  -4   43.14    1.86 
  -8 -10   4   42.45    1.73 
   8  10  -4   43.06    1.74 
   8  10  -4   44.69    1.51 
   6  10  -4    7.76    0.88 
  -6 -10   4    7.77    0.87 
  -6  10   4    8.64    1.01 
   6 -10  -4    8.19    0.96 
   6  10  -4    8.13    0.71 
  -4  10   4   12.52    1.04 
  -4 -10   4   13.84    1.09 
   4 -10  -4   13.07    1.06 
   4  10  -4   13.70    1.06 
   4  10  -4   13.20    0.85 
   2 -10  -4  204.60    4.21 
  -2  10   4  202.36    4.41 
   2  10  -4  202.10    4.18 
  -2 -10   4  202.58    4.32 
   0  10   4   -0.46    0.34 
   0 -10  -4   -0.48    0.36 
   0 -10   4    0.44    0.45 
   2 -10   4    0.15    0.44 
   2  10   4   -0.52    0.41 
   2  10   4    0.18    0.24 
  -2 -10  -4    0.35    0.39 
   4  10   4    6.24    0.54 
   4 -10   4    4.66    0.81 
  -4 -10  -4    6.42    0.77 
   4  10   4    4.82    0.82 
  -6 -10  -4    4.21    0.63 
   6 -10   4    3.53    0.76 
   6  10   4    4.00    0.76 
   6  10   4    5.13    0.55 
   8  10   4    2.24    0.63 
  -8 -10  -4    2.64    0.53 
   8 -10   4    3.43    0.73 
   8  10   4    3.61    0.52 
  10 -10   4   53.11    2.24 
  10  10   4   52.94    2.22 
 -10 -10  -4   56.04    1.68 
  10  10   4   53.90    1.63 
 -12 -10  -4    4.32    0.56 
  12  10   4    3.55    0.58 
  12 -10   4    3.73    0.80 
  12  10   4    4.28    0.84 
  14  10   4   13.27    0.98 
  14  10   4   12.20    1.42 
  14 -10   4   15.71    1.34 
  16 -10   4    5.20    1.01 
  16  10   4    5.19    1.05 
  16  10   4    4.62    0.75 
  18 -10   4    5.51    1.03 
  18  10   4    5.76    1.07 
  20 -10   4   21.33    1.70 
  20  10   4   20.16    1.76 
  22  10   4   19.18    1.71 
  22 -10   4   20.61    1.70 
  24  10   4   17.80    1.88 
  24 -10   4   16.98    1.75 
  26  10   4    6.56    1.35 
  26 -10   4    6.39    1.18 
  26 -10   4    6.67    1.24 
  28 -10   4   29.06    2.06 
  28 -10   4   24.69    2.02 
  28  10   4   25.46    2.15 
  30  10   4    5.56    1.37 
  30 -10   4    6.73    1.34 
  30 -10   4    7.06    1.27 
  32 -10   4    5.29    1.20 
  32  10   4    4.24    1.34 
  32 -10   4    3.45    1.08 
  34  10   4    1.88    1.04 
  34 -10   4    0.81    0.87 
  34 -10   4    0.39    0.80 
  36 -10   4    6.18    1.44 
  36  10   4    4.10    1.37 
  38  10   4    6.54    1.59 
  38 -10   4    9.32    1.64 
  41  11  -4    0.47    0.88 
  41 -11  -4    3.11    1.28 
  39  11  -4    1.59    0.93 
  39 -11  -4    0.18    0.86 
  37 -11  -4    3.86    1.21 
  37  11  -4    4.84    1.19 
  35 -11  -4   14.74    1.79 
  35  11  -4   17.05    1.97 
  35  11  -4   15.72    1.78 
  33 -11  -4    0.97    0.88 
  33  11  -4    0.13    0.79 
  33  11  -4    1.32    0.80 
  31  11  -4   21.03    1.72 
  31  11  -4   22.50    1.90 
  31 -11  -4   20.68    2.06 
  29  11  -4   23.47    1.86 
  29 -11  -4   26.32    2.02 
  29  11  -4   24.62    1.75 
  27 -11  -4    9.63    1.45 
  27  11  -4   11.36    1.45 
  27  11  -4    8.21    1.17 
  25  11  -4    0.21    0.56 
  25  11  -4    0.21    0.64 
  25 -11  -4    0.17    0.70 
  23  11  -4   96.90    3.09 
  23  11  -4  101.90    3.36 
  23 -11  -4  104.82    3.57 
  21  11  -4    6.37    1.06 
  21 -11  -4    5.89    1.09 
  21  11  -4    3.48    0.78 
  19  11  -4    9.93    1.18 
  19  11  -4   10.98    1.12 
  19 -11  -4   11.32    1.43 
  17  11  -4   27.45    1.45 
  17  11  -4   23.86    1.55 
  17 -11  -4   26.82    1.76 
  15  11  -4   22.34    1.47 
  15 -11  -4   19.67    1.54 
  15  11  -4   21.34    1.30 
 -15 -11   4   20.54    1.18 
  13  11  -4   15.05    1.08 
  13  11  -4   14.13    1.35 
 -13 -11   4   11.32    1.06 
  13 -11  -4   12.72    1.32 
  11  11  -4  248.34    5.04 
  11 -11  -4  256.69    5.41 
 -11 -11   4  253.48    4.90 
  11  11  -4  257.29    4.73 
  -9 -11   4   31.16    1.56 
   9  11  -4   33.20    1.64 
   9 -11  -4   31.03    1.72 
   9  11  -4   29.99    1.36 
   7 -11  -4    5.84    0.92 
   7  11  -4    5.80    0.70 
   7  11  -4    5.41    0.84 
  -7 -11   4    7.20    0.91 
  -5  11   4  215.76    4.74 
   5  11  -4  211.87    4.07 
   5 -11  -4  226.62    4.69 
  -5 -11   4  218.50    4.60 
   5  11  -4  211.79    4.44 
  -3 -11   4   15.94    1.25 
   3  11  -4   14.74    1.19 
   3 -11  -4   14.29    1.16 
  -3  11   4   15.04    1.23 
  -1 -11   4    9.59    1.14 
  -1  11   4    9.62    1.11 
   1 -11  -4   10.28    1.08 
  -1 -11  -4  523.82    8.36 
   1  11   4  532.15    8.91 
   1 -11   4  525.00    8.80 
   3  11   4   28.70    1.68 
   3 -11   4   25.32    1.60 
  -3 -11  -4   26.75    1.40 
   3  11   4   24.51    0.99 
  -5 -11  -4   -0.01    0.41 
   5  11   4    0.62    0.34 
   5 -11   4    0.19    0.53 
   5  11   4   -0.70    0.35 
   7  11   4  127.75    3.59 
  -7 -11  -4  129.16    2.99 
   7  11   4  127.76    2.62 
   9  11   4    1.28    0.64 
  -9 -11  -4    0.75    0.44 
   9  11   4    1.50    0.43 
   9 -11   4    2.55    0.75 
 -11 -11  -4    3.73    0.60 
  11  11   4    2.70    0.74 
  11  11   4    4.01    0.61 
  11 -11   4    3.90    0.91 
  13 -11   4  352.55    7.02 
  13  11   4  355.59    5.85 
  13  11   4  351.15    7.08 
  15  11   4   23.77    1.71 
  15  11   4   25.65    1.35 
  15 -11   4   24.11    1.75 
  17  11   4    1.74    0.59 
  17  11   4    1.59    0.75 
  17 -11   4    3.09    0.90 
  19  11   4  206.50    5.38 
  19 -11   4  221.65    5.42 
  19  11   4  220.34    4.58 
  21  11   4    2.05    0.81 
  21 -11   4    2.34    0.89 
  21  11   4    0.66    0.56 
  23 -11   4   -0.08    0.69 
  23  11   4   -0.03    0.69 
  25  11   4  145.39    4.66 
  25 -11   4  148.74    4.51 
  27  11   4    0.32    0.76 
  27 -11   4    0.60    0.72 
  29  11   4    5.57    1.35 
  29 -11   4    2.88    0.97 
  29 -11   4    5.05    1.22 
  31 -11   4   60.12    3.00 
  31  11   4   54.49    3.07 
  31 -11   4   56.05    3.08 
  33 -11   4    0.32    0.82 
  33 -11   4    2.44    1.05 
  33  11   4    2.42    1.04 
  35  11   4    0.38    0.99 
  35 -11   4    0.14    0.88 
  35 -11   4    1.49    0.98 
  37 -11   4   44.01    2.97 
  37  11   4   44.67    3.13 
  40  12  -4    0.03    0.76 
  40 -12  -4   -0.82    0.86 
  38 -12  -4   -0.56    0.93 
  38  12  -4   -0.77    0.62 
  36  12  -4    1.19    0.91 
  36 -12  -4    1.82    1.07 
  34 -12  -4    9.66    1.58 
  34  12  -4   11.72    1.68 
  32  12  -4  101.30    3.82 
  32  12  -4  103.57    3.69 
  32 -12  -4  104.55    3.98 
  30 -12  -4   12.01    1.68 
  30  12  -4   12.05    1.45 
  30  12  -4   13.62    1.72 
  28  12  -4    1.62    0.74 
  28 -12  -4    2.28    0.94 
  28  12  -4    3.62    0.99 
  26  12  -4    3.70    1.03 
  26  12  -4    2.88    0.81 
  26 -12  -4    2.41    0.89 
  24 -12  -4    1.30    0.75 
  24  12  -4    2.13    0.81 
  24  12  -4    1.83    0.72 
  22 -12  -4   24.13    1.88 
  22  12  -4   19.78    1.64 
  22  12  -4   22.94    1.63 
  20  12  -4  286.73    6.06 
  20 -12  -4  291.22    6.46 
  20  12  -4  293.33    5.82 
  18  12  -4    5.26    0.87 
  18  12  -4    4.72    0.96 
  18 -12  -4    4.30    1.00 
  16  12  -4   11.70    1.27 
  16  12  -4   11.84    1.15 
  16 -12  -4   10.13    1.24 
  14 -12  -4   18.45    1.45 
  14  12  -4   18.60    1.24 
 -14 -12   4   18.73    1.21 
  14  12  -4   17.83    1.38 
  12  12  -4   31.19    1.47 
 -12 -12   4   33.92    1.60 
  12  12  -4   27.92    1.64 
  12 -12  -4   31.42    1.85 
  10 -12  -4   47.78    2.20 
  10  12  -4   49.48    2.09 
 -10 -12   4   47.40    1.98 
  10  12  -4   47.28    1.80 
   8 -12  -4  169.75    4.25 
   8  12  -4  169.07    3.98 
  -8 -12   4  176.02    4.08 
   8  12  -4  172.47    3.67 
   6 -12  -4   54.41    2.24 
   6  12  -4   51.71    1.83 
  -6 -12   4   54.88    2.16 
   6  12  -4   55.06    2.15 
   4 -12  -4   40.06    1.88 
  -4  12   4   42.38    2.00 
  -4 -12   4   41.35    1.93 
   4  12  -4   38.02    1.82 
  -2  12   4   11.22    1.25 
   2 -12  -4   10.50    1.10 
   2  12  -4    9.64    1.09 
  -2 -12   4   11.42    1.28 
   0  12   4   11.66    1.27 
   0 -12  -4   10.24    1.10 
   0 -12   4   10.66    1.19 
  -2 -12  -4   19.79    1.35 
   2 -12   4   19.17    1.47 
   2  12   4   19.90    1.44 
   4 -12   4  185.30    4.54 
   4  12   4  187.23    4.45 
   4  12   4  187.61    4.54 
  -4 -12  -4  180.86    3.99 
   6 -12   4   29.35    1.81 
  -6 -12  -4   24.82    1.39 
   6  12   4   27.21    1.72 
   6  12   4   26.36    1.19 
  -8 -12  -4   30.76    1.44 
   8 -12   4   28.50    1.82 
   8  12   4   28.18    1.74 
   8  12   4   27.99    1.21 
  10  12   4   49.15    1.66 
  10 -12   4   43.31    2.17 
  10  12   4   51.66    2.39 
 -10 -12  -4   48.55    1.76 
  12  12   4   46.79    1.72 
  12 -12   4   44.63    2.29 
  12  12   4   45.70    2.33 
  14 -12   4   16.96    1.71 
  14  12   4   11.80    1.41 
  14  12   4   13.99    1.09 
  16  12   4   54.10    2.57 
  16 -12   4   56.12    2.63 
  16  12   4   55.29    2.02 
  18  12   4   30.50    1.58 
  18  12   4   32.32    2.10 
  18 -12   4   26.75    1.98 
  20  12   4   40.72    2.34 
  20 -12   4   35.25    2.24 
  20  12   4   35.68    1.80 
  22  12   4   61.31    2.98 
  22  12   4   58.37    2.31 
  22 -12   4   55.07    2.78 
  24  12   4   12.76    1.71 
  24  12   4   15.19    1.46 
  24 -12   4   15.50    1.80 
  26 -12   4    0.56    0.83 
  26  12   4    0.10    0.59 
  26  12   4    0.10    0.86 
  28  12   4   15.93    1.99 
  28  12   4   12.65    1.46 
  28 -12   4   14.01    1.81 
  30 -12   4    4.81    1.14 
  30  12   4    3.52    0.99 
  30  12   4    3.58    1.15 
  30 -12   4    3.03    1.08 
  32 -12   4   11.10    1.71 
  32 -12   4   10.93    1.62 
  32  12   4   10.05    1.43 
  32  12   4   11.28    1.81 
  34 -12   4   31.59    2.56 
  34 -12   4   25.79    2.46 
  34  12   4   25.87    2.65 
  34  12   4   28.05    2.23 
  36 -12   4   22.68    2.34 
  36  12   4   24.29    2.53 
  36 -12   4   19.62    2.26 
  41 -13  -4   39.07    3.03 
  39  13  -4    5.53    1.39 
  39 -13  -4    5.63    1.51 
  37  13  -4   -0.40    0.69 
  37 -13  -4   -0.55    0.95 
  35  13  -4    9.56    1.57 
  35 -13  -4    7.79    1.55 
  33 -13  -4    1.55    0.95 
  33  13  -4    1.31    0.95 
  31 -13  -4    2.42    1.09 
  31  13  -4    1.76    0.93 
  29 -13  -4   56.37    3.00 
  29  13  -4   54.19    2.76 
  29  13  -4   50.43    2.58 
  27 -13  -4   18.47    2.01 
  27  13  -4   15.40    1.58 
  27  13  -4   15.37    1.72 
  25  13  -4    0.86    0.61 
  25 -13  -4   -1.30    0.77 
  25  13  -4    0.91    0.75 
  23 -13  -4    6.19    1.18 
  23  13  -4    6.67    1.05 
  23  13  -4    5.37    1.08 
  21  13  -4   -0.16    0.53 
  21  13  -4    0.51    0.71 
  21 -13  -4    1.56    0.89 
  19 -13  -4   13.07    1.56 
  19  13  -4   11.49    1.30 
  19  13  -4   10.69    1.30 
  17 -13  -4  252.47    5.99 
  17  13  -4  262.99    5.69 
  17  13  -4  270.92    5.43 
  15 -13  -4   19.58    1.67 
  15  13  -4   13.92    1.39 
  15  13  -4   16.00    1.31 
 -13 -13   4    3.45    0.72 
  13  13  -4    4.24    0.88 
  13  13  -4    2.69    0.64 
  13 -13  -4    3.83    0.93 
 -11 -13   4   58.91    2.26 
  11 -13  -4   58.97    2.52 
  11  13  -4   59.16    2.10 
  11  13  -4   61.76    2.40 
   9  13  -4   -0.08    0.38 
   9 -13  -4    0.70    0.55 
  -9 -13   4    0.55    0.51 
   9  13  -4   -0.19    0.45 
   7  13  -4   13.92    1.36 
  -7 -13   4   14.91    1.31 
   7 -13  -4   10.82    1.27 
   7  13  -4   13.47    1.08 
  -5  13   4  192.09    4.71 
   5  13  -4  205.44    4.18 
   5  13  -4  192.81    4.45 
  -5 -13   4  194.44    4.56 
   5 -13  -4  194.89    4.63 
  -3 -13   4   21.88    1.51 
   3 -13  -4   21.68    1.50 
  -3  13   4   21.84    1.56 
   3  13  -4   17.93    1.41 
  -1 -13   4   25.00    1.64 
   1 -13  -4   24.18    1.54 
  -1  13   4   24.84    1.65 
  -1 -13  -4   75.44    2.58 
   1  13   4   80.17    2.86 
   1 -13   4   80.66    2.87 
   3  13   4   11.74    1.36 
  -3 -13  -4   13.23    1.13 
   3 -13   4   12.64    1.42 
   5 -13   4    3.16    0.85 
  -5 -13  -4    2.90    0.69 
   5  13   4    2.63    0.78 
   7  13   4  231.59    5.41 
   7 -13   4  226.27    5.40 
  -7 -13  -4  232.03    4.69 
  -9 -13  -4    0.06    0.43 
   9 -13   4    0.29    0.65 
   9  13   4   -0.18    0.59 
  11 -13   4   13.68    1.48 
  11  13   4   16.28    1.68 
  13 -13   4   67.34    2.85 
  13  13   4   62.45    2.77 
  15 -13   4    3.82    1.01 
  15  13   4    3.96    0.99 
  17  13   4    4.10    1.06 
  17 -13   4    6.42    1.23 
  19  13   4  135.46    4.40 
  19 -13   4  133.40    4.34 
  21  13   4   -0.25    0.76 
  21 -13   4   -0.21    0.69 
  23  13   4   11.27    1.66 
  23 -13   4    9.75    1.49 
  25  13   4   24.26    2.06 
  25 -13   4   25.58    2.16 
  27 -13   4    0.88    0.92 
  27  13   4    1.59    0.95 
  29 -13   4   -0.23    0.74 
  29  13   4   -0.58    0.77 
  31 -13   4   21.24    2.28 
  31 -13   4   30.28    2.41 
  31  13   4   23.29    2.45 
  33  13   4   -0.34    0.88 
  33 -13   4    1.91    1.01 
  33 -13   4    0.80    0.95 
  35 -13   4    8.46    1.68 
  35  13   4    6.11    1.50 
  35 -13   4    6.86    1.48 
  37 -13   4    4.25    1.41 
  40 -14  -4    0.21    1.09 
  38 -14  -4   49.87    3.31 
  38  14  -4   45.45    2.93 
  36  14  -4   28.95    2.37 
  36 -14  -4   26.71    2.62 
  34 -14  -4   -2.31    0.83 
  34  14  -4    0.15    0.80 
  32 -14  -4   -1.05    0.89 
  32  14  -4   -0.09    0.71 
  30 -14  -4   34.70    2.59 
  30  14  -4   29.29    2.22 
  28  14  -4    1.93    0.89 
  28 -14  -4    3.55    1.16 
  26  14  -4   74.82    3.14 
  26 -14  -4   67.29    3.25 
  26  14  -4   71.22    4.29 
  24  14  -4   24.87    1.89 
  24  14  -4   25.12    1.76 
  24 -14  -4   24.08    2.34 
  22  14  -4    5.93    1.01 
  22  14  -4    3.70    0.97 
  22 -14  -4    3.11    1.05 
  20  14  -4   -0.15    0.52 
  20 -14  -4   -0.52    0.67 
  20  14  -4    0.45    0.66 
  18  14  -4   44.94    2.08 
  18 -14  -4   44.15    2.45 
  18  14  -4   43.08    2.23 
  16  14  -4    5.70    1.02 
  16 -14  -4    6.05    1.20 
  16  14  -4    8.25    1.24 
  14 -14  -4  206.85    5.32 
  14  14  -4  200.87    4.86 
  14  14  -4  206.82    4.60 
  12 -14  -4   40.28    2.30 
  12  14  -4   38.46    1.87 
 -12 -14   4   41.71    1.99 
  12  14  -4   40.48    2.05 
  10  14  -4    0.99    0.63 
 -10 -14   4    0.12    0.55 
  10 -14  -4   -0.16    0.64 
  10  14  -4   -0.10    0.50 
   8  14  -4    1.31    0.59 
   8 -14  -4    2.71    0.89 
  -8 -14   4    0.55    0.60 
   8  14  -4    1.68    0.64 
   6  14  -4   30.86    1.58 
  -6 -14   4   35.53    1.92 
   6  14  -4   32.48    1.82 
   6 -14  -4   29.17    1.89 
   4 -14  -4    3.48    0.87 
  -4  14   4    2.46    0.73 
   4  14  -4    2.80    0.82 
  -4 -14   4    4.61    0.91 
  -2  14   4  110.13    3.53 
  -2 -14   4  116.44    3.55 
   2 -14  -4  115.22    3.45 
   0 -14   4   21.90    1.64 
   0  14   4   22.07    1.67 
   0 -14  -4   22.58    1.56 
   2 -14   4   19.93    1.63 
   2  14   4   18.83    1.58 
  -2 -14  -4   16.27    1.36 
  -4 -14  -4   17.37    1.38 
   4  14   4   13.11    1.44 
   4 -14   4   16.53    1.63 
   6  14   4   18.60    1.76 
  -6 -14  -4   18.99    1.41 
   6 -14   4   23.00    1.81 
   8  14   4   23.54    1.75 
  -8 -14  -4   20.76    1.41 
   8 -14   4   24.45    1.85 
  10  14   4   59.32    2.67 
  10 -14   4   57.26    2.69 
  12  14   4    3.06    0.93 
  12 -14   4    4.00    1.01 
  14  14   4    8.55    1.32 
  14 -14   4   11.17    1.55 
  16  14   4    6.78    1.28 
  16 -14   4    7.22    1.28 
  18 -14   4    2.99    1.03 
  18  14   4    1.02    1.01 
  20 -14   4    6.88    1.35 
  20  14   4    6.89    1.39 
  22 -14   4   34.96    2.44 
  22  14   4   31.52    2.35 
  24  14   4    0.18    0.87 
  24 -14   4    0.54    0.94 
  26 -14   4   14.52    1.91 
  26  14   4   13.03    1.82 
  28 -14   4   15.11    1.94 
  28  14   4   14.53    1.96 
  30 -14   4    0.79    0.87 
  30  14   4   -0.42    0.74 
  32  14   4   23.12    2.50 
  32 -14   4   25.53    2.54 
  32 -14   4   28.19    2.45 
  34  14   4    6.32    1.62 
  34 -14   4    8.22    1.72 
  34 -14   4    9.68    1.69 
  36 -14   4    0.25    1.00 
  37  15  -4    1.01    0.97 
  37 -15  -4   -0.43    0.96 
  35  15  -4    5.85    1.35 
  35 -15  -4    4.93    1.39 
  33  15  -4    2.03    1.05 
  33 -15  -4    4.06    1.40 
  31  15  -4    2.28    1.03 
  31 -15  -4    1.79    1.16 
  29  15  -4   25.87    2.14 
  29 -15  -4   31.30    2.52 
  27 -15  -4    1.61    1.03 
  27  15  -4    2.42    0.98 
  25 -15  -4    0.40    0.84 
  25  15  -4    0.35    0.72 
  23 -15  -4   40.00    2.63 
  23  15  -4   35.23    2.27 
  21 -15  -4   -0.95    0.75 
  21  15  -4    0.76    0.63 
  21  15  -4    0.37    0.65 
  19  15  -4   -1.13    0.52 
  19 -15  -4    0.23    0.80 
  19  15  -4   -0.26    0.50 
  17  15  -4   71.62    2.66 
  17  15  -4   72.48    2.91 
  17 -15  -4   68.36    3.08 
  15  15  -4   20.78    1.67 
  15  15  -4   22.83    1.55 
  15 -15  -4   21.88    1.92 
  13 -15  -4    3.22    1.03 
  13  15  -4    4.51    0.98 
  13  15  -4    4.05    0.89 
  11  15  -4  180.10    4.56 
  11  15  -4  175.54    4.22 
  11 -15  -4  181.37    4.96 
 -11 -15   4  181.03    4.51 
  -9 -15   4    4.31    0.93 
   9 -15  -4    4.74    1.09 
   9  15  -4    3.95    0.92 
   9  15  -4    5.14    0.89 
   7 -15  -4    0.17    0.64 
  -7 -15   4   -0.20    0.52 
   7  15  -4   -0.63    0.47 
   7  15  -4   -0.71    0.58 
   5 -15  -4  115.38    3.66 
   5  15  -4  119.93    3.56 
  -5 -15   4  121.26    3.69 
   3 -15  -4    2.09    0.80 
  -3 -15   4    2.92    0.87 
  -3  15   4    2.60    0.83 
   1 -15  -4    3.06    0.91 
  -1  15   4    5.32    1.02 
  -1 -15   4    3.63    0.94 
  -1 -15  -4  123.43    3.62 
   1  15   4  127.65    3.96 
   1 -15   4  119.67    3.82 
   3  15   4   25.53    1.83 
  -3 -15  -4   24.73    1.67 
   3 -15   4   25.14    1.87 
   5  15   4    4.16    1.08 
   5 -15   4    5.47    1.11 
  -5 -15  -4    5.32    0.92 
   7  15   4  171.77    4.75 
  -7 -15  -4  163.71    4.04 
   7 -15   4  164.28    4.74 
   9  15   4    2.41    0.84 
   9 -15   4    2.58    0.96 
  11 -15   4   13.28    1.68 
  11  15   4   12.54    1.57 
  13  15   4  198.39    5.41 
  13 -15   4  191.81    5.39 
  15 -15   4    9.46    1.48 
  15  15   4   10.04    1.60 
  17 -15   4    5.30    1.22 
  17  15   4    5.04    1.23 
  19 -15   4  105.68    4.05 
  19  15   4  114.14    4.17 
  21 -15   4    0.37    0.76 
  21  15   4   -0.68    0.70 
  23  15   4    1.24    0.90 
  23 -15   4    0.29    0.89 
  25  15   4   60.84    3.29 
  25 -15   4   62.74    3.36 
  27 -15   4    1.53    1.01 
  27  15   4    1.25    1.01 
  29 -15   4    5.99    1.39 
  29  15   4    4.63    1.37 
  31 -15   4   57.10    3.24 
  31 -15   4   55.82    3.29 
  31  15   4   55.30    3.35 
  33 -15   4   -0.09    0.84 
  33 -15   4   -0.29    0.98 
  33  15   4    0.91    1.02 
  34  16  -4    6.29    1.42 
  34 -16  -4    6.18    1.61 
  32 -16  -4   93.40    4.26 
  32  16  -4   87.32    3.84 
  30  16  -4    0.28    0.81 
  30 -16  -4   -1.88    0.93 
  28 -16  -4    1.07    1.11 
  28  16  -4    0.79    0.91 
  26 -16  -4    8.15    1.56 
  26  16  -4    8.11    1.42 
  24  16  -4    0.47    0.82 
  24 -16  -4    0.30    0.80 
  22  16  -4   25.12    2.02 
  22 -16  -4   24.10    2.12 
  20 -16  -4   94.72    3.86 
  20  16  -4   97.90    3.55 
  18 -16  -4   -0.03    0.76 
  18  16  -4   -0.28    0.63 
  16 -16  -4    5.36    1.16 
  16  16  -4    4.30    0.91 
  16  16  -4    3.68    1.02 
  14  16  -4    1.75    0.68 
  14  16  -4    0.53    0.63 
  14 -16  -4    1.50    0.89 
  12  16  -4    0.73    0.59 
  12  16  -4   -1.10    0.53 
  12 -16  -4   -0.07    0.66 
 -10 -16   4   10.19    1.28 
  10  16  -4    8.74    1.27 
  10 -16  -4    9.67    1.47 
  10  16  -4   10.62    1.22 
   8  16  -4  148.22    3.88 
  -8 -16   4  148.02    4.19 
   8  16  -4  140.43    4.12 
   8 -16  -4  147.78    4.45 
  -6 -16   4    2.05    0.77 
   6 -16  -4    1.42    0.83 
   6  16  -4    1.20    0.81 
   4 -16  -4   12.06    1.45 
  -4 -16   4    7.73    1.20 
  -2  16   4    0.50    0.70 
  -2 -16   4   -0.05    0.58 
   2 -16  -4    0.43    0.66 
   0  16   4   -0.21    0.59 
   0 -16  -4    0.47    0.57 
   0 -16   4    0.98    0.69 
  -2 -16  -4    6.71    1.12 
   2  16   4    5.75    1.11 
   2 -16   4    4.90    1.09 
   4  16   4   51.92    2.64 
  -4 -16  -4   54.76    2.35 
   4 -16   4   55.37    2.75 
  -6 -16  -4   11.40    1.29 
   6  16   4    8.77    1.39 
   6 -16   4    9.75    1.46 
   8 -16   4   11.64    1.61 
   8  16   4    9.44    1.46 
  10 -16   4   36.46    2.39 
  10  16   4   34.55    2.33 
  12 -16   4   11.71    1.62 
  12  16   4    9.37    1.45 
  14  16   4   -0.04    0.80 
  14 -16   4    0.02    0.70 
  16 -16   4   20.54    2.09 
  16  16   4   18.60    1.94 
  18  16   4    6.54    1.27 
  18 -16   4    6.54    1.47 
  20  16   4    4.90    1.26 
  20 -16   4    5.05    1.36 
  22  16   4   29.93    2.40 
  22 -16   4   28.86    2.49 
  24 -16   4   16.64    2.13 
  24  16   4   18.23    2.13 
  26 -16   4    1.88    1.12 
  26  16   4    0.22    1.03 
  28  16   4    0.77    0.99 
  28 -16   4    0.75    0.96 
  30 -16   4    4.03    1.36 
  30  16   4    0.56    1.01 
  32 -16   4    1.12    0.90 
  32 -16   4    1.92    1.44 
  33  17  -4   -0.02    0.88 
  31  17  -4    6.11    1.40 
  31 -17  -4    7.15    1.62 
  29 -17  -4   32.77    3.04 
  29  17  -4   27.43    2.31 
  27 -17  -4   15.38    2.16 
  27  17  -4   17.01    1.92 
  25  17  -4    0.92    0.89 
  25 -17  -4    1.98    1.25 
  23  17  -4   55.89    2.90 
  23 -17  -4   54.01    3.19 
  21 -17  -4    1.57    1.02 
  21  17  -4    0.31    0.79 
  19 -17  -4    1.75    0.98 
  19  17  -4    1.65    0.92 
  17 -17  -4   26.75    2.30 
  17  17  -4   33.94    2.16 
  15  17  -4    8.28    1.28 
  15 -17  -4   10.07    1.58 
  13  17  -4    1.75    1.10 
  13 -17  -4    1.95    1.01 
  13  17  -4    1.67    0.80 
  11  17  -4  126.17    3.66 
  11 -17  -4  127.66    4.32 
  11  17  -4  122.37    3.87 
   9  17  -4   11.46    1.45 
  -9 -17   4   10.75    1.37 
   9 -17  -4   13.23    1.69 
   9  17  -4    9.62    1.19 
   7 -17  -4   -1.54    0.63 
   7  17  -4   -0.05    0.67 
  -7 -17   4    0.07    0.64 
  -5 -17   4   15.18    1.62 
   5 -17  -4   17.26    1.83 
  -3 -17   4   21.13    1.99 
   3 -17  -4   20.39    1.76 
  -1 -17   4   -0.01    0.59 
   1 -17  -4    1.76    0.79 
  -1  17   4    0.97    0.77 
  -1 -17  -4  156.12    4.40 
   1 -17   4  165.04    4.82 
   1  17   4  157.25    4.70 
   3 -17   4    7.41    1.35 
  -3 -17  -4    7.64    1.18 
   3  17   4    6.91    1.32 
   5 -17   4   -0.33    0.73 
  -5 -17  -4   -0.03    0.54 
   5  17   4    0.15    0.74 
   7  17   4    6.71    1.25 
   7 -17   4    8.59    1.47 
   9  17   4   -0.23    0.76 
   9 -17   4    1.11    0.90 
  11  17   4    0.38    0.93 
  11 -17   4    0.58    0.87 
  13  17   4  134.50    4.53 
  13 -17   4  131.80    4.66 
  15 -17   4    2.03    1.04 
  15  17   4    2.22    0.99 
  17  17   4   -0.60    0.78 
  17 -17   4    0.01    0.84 
  19  17   4    9.02    1.61 
  19 -17   4   11.49    1.83 
  21  17   4    1.27    1.02 
  21 -17   4    1.68    1.05 
  23 -17   4    1.29    1.03 
  23  17   4    0.23    0.98 
  25  17   4   47.27    3.05 
  25 -17   4   50.07    3.20 
  27  17   4    1.19    1.05 
  27 -17   4    0.69    0.99 
  29 -17   4    0.21    0.94 
  29  17   4    2.30    1.15 
  32  18  -4   16.48    2.07 
  30  18  -4   16.49    2.02 
  28  18  -4    2.11    1.09 
  28 -18  -4    1.89    1.27 
  26  18  -4   10.45    1.63 
  26 -18  -4   11.41    2.00 
  24  18  -4   11.66    1.70 
  24 -18  -4   11.42    1.94 
  22 -18  -4    1.62    1.08 
  22  18  -4    3.82    1.17 
  20 -18  -4   41.57    2.82 
  20  18  -4   38.90    2.46 
  18  18  -4   15.50    1.76 
  18 -18  -4   16.46    2.01 
  16 -18  -4    9.98    1.66 
  16  18  -4    9.21    1.42 
  14  18  -4   21.46    2.02 
  14 -18  -4   22.14    2.28 
  12  18  -4   11.50    1.52 
  12 -18  -4    9.71    1.56 
  10 -18  -4   14.68    1.83 
  10  18  -4   10.87    1.52 
  -8 -18   4   37.59    2.30 
   8  18  -4   42.85    2.45 
   8 -18  -4   40.29    2.56 
  -6 -18   4   41.24    2.41 
   6 -18  -4   40.27    2.49 
   4 -18  -4   24.05    2.03 
  -4 -18   4   21.90    1.90 
   2 -18  -4   29.84    2.14 
  -2 -18   4   29.42    2.15 
   0  18   4   11.29    1.63 
   0 -18  -4   11.99    1.57 
   0 -18   4   11.44    1.57 
   2 -18   4    9.18    1.47 
   2  18   4    6.64    1.26 
  -2 -18  -4    9.77    1.36 
  -4 -18  -4   39.66    3.32 
   4 -18   4   49.76    2.80 
   4  18   4   46.87    2.72 
   6 -18   4   15.81    1.94 
   6  18   4   19.99    2.04 
   8  18   4   33.70    2.35 
   8 -18   4   35.93    2.54 
  10  18   4   14.14    1.79 
  10 -18   4   14.19    1.83 
  12 -18   4   10.84    1.72 
  12  18   4    9.74    1.60 
  14  18   4   10.61    1.67 
  14 -18   4   11.84    1.79 
  16 -18   4   23.37    2.45 
  16  18   4   31.17    2.46 
  18 -18   4   13.68    1.99 
  18  18   4   11.99    1.74 
  20  18   4   17.42    2.12 
  20 -18   4   13.98    1.96 
  22  18   4   23.29    2.51 
  22 -18   4   24.49    2.56 
  24 -18   4    9.01    1.73 
  24  18   4    8.59    1.66 
  26  18   4   13.63    1.98 
  26 -18   4   13.74    2.16 
  29  19  -4   13.49    1.89 
  27  19  -4   -0.40    0.76 
  25 -19  -4    6.29    1.62 
  25  19  -4    8.57    1.57 
  23  19  -4   10.16    1.59 
  23 -19  -4   13.76    2.07 
  21  19  -4    1.51    0.96 
  21 -19  -4    2.56    1.35 
  19 -19  -4    0.22    0.96 
  19  19  -4    0.63    0.90 
  17 -19  -4   29.83    2.41 
  17  19  -4   27.15    2.21 
  15  19  -4   -0.44    0.74 
  15 -19  -4    0.90    0.94 
  13 -19  -4    8.81    1.59 
  13  19  -4    7.00    1.39 
  11  19  -4   14.44    1.70 
  11 -19  -4   19.32    2.09 
   9 -19  -4    0.26    0.76 
   9  19  -4   -0.27    0.70 
   7 -19  -4    3.92    1.13 
  -5 -19   4   46.29    2.62 
   5 -19  -4   44.97    2.63 
   3 -19  -4    0.07    0.73 
  -3 -19   4   -0.28    0.75 
   1 -19  -4    7.34    1.35 
  -1 -19   4   10.11    1.59 
   1  19   4   10.33    1.55 
   1 -19   4   13.74    1.83 
  -1 -19  -4    9.06    1.38 
   3  19   4   -0.27    0.78 
   3 -19   4    0.10    0.78 
   5  19   4   25.14    2.09 
   5 -19   4   23.00    2.26 
   7 -19   4   45.06    2.84 
   7  19   4   52.22    2.94 
   9  19   4    0.93    0.80 
   9 -19   4    0.08    0.83 
  11  19   4   11.12    1.72 
  11 -19   4   13.13    1.94 
  13  19   4   15.64    1.93 
  13 -19   4   20.32    2.34 
  15 -19   4    2.56    1.19 
  15  19   4    2.71    1.13 
  17 -19   4   10.46    1.78 
  17  19   4    7.46    1.45 
  19 -19   4   35.73    2.82 
  19  19   4   34.45    2.70 
  21 -19   4   -0.21    0.89 
  21  19   4   -1.18    0.76 
  23 -19   4    3.31    1.48 
  23  19   4    4.70    1.42 
  25  19   4    4.23    2.04 
  22 -20  -4    5.84    1.71 
  20 -20  -4   45.55    3.15 
  18 -20  -4    2.45    1.28 
  16  20  -4   -0.39    0.99 
  16 -20  -4    0.27    0.99 
  14 -20  -4   -0.48    0.91 
  14  20  -4   -0.09    0.88 
  12  20  -4    9.75    1.65 
  12 -20  -4   10.41    1.76 
  10 -20  -4    5.78    1.48 
   8 -20  -4   40.78    2.79 
   6 -20  -4    4.47    1.40 
   4 -20  -4   -0.18    0.81 
  -4 -20   4    0.82    0.80 
  -2 -20   4   -0.38    0.74 
   2 -20  -4   -0.64    0.73 
   0 -20  -4    2.65    1.04 
   0 -20   4    2.87    1.03 
   2 -20   4    1.61    1.01 
   2  20   4   -0.44    0.83 
   4  20   4   45.27    2.83 
   4 -20   4   40.09    2.75 
   6 -20   4    1.30    1.03 
   6  20   4    1.47    0.98 
   8  20   4   -0.40    0.83 
   8 -20   4    0.53    0.94 
  10  20   4    7.29    1.49 
  10 -20   4    8.19    1.61 
  12  20   4   -0.66    0.83 
  12 -20   4    0.09    0.89 
  14  20   4    0.62    0.98 
  14 -20   4    1.43    1.03 
  16 -20   4    4.86    1.44 
  16  20   4    4.59    1.31 
  18  20   4    0.48    0.91 
  18 -20   4   -0.54    0.78 
  20  20   4   -0.18    0.88 
  22  20   4    4.12    1.60 
  19 -21  -4   -0.20    1.00 
  17 -21  -4    8.82    1.82 
  15 -21  -4   10.74    1.90 
  13 -21  -4   -0.15    0.98 
  11 -21  -4   78.60    3.86 
   9 -21  -4    3.99    1.29 
   7 -21  -4    1.41    1.06 
   5 -21  -4   -0.99    0.85 
  -3 -21   4   13.37    1.81 
   3 -21  -4   13.95    1.90 
  -1 -21   4    0.40    0.86 
   1 -21  -4    1.17    0.98 
   1 -21   4  113.74    4.44 
   3  21   4   13.47    1.88 
   3 -21   4   12.77    1.90 
   5 -21   4    4.44    1.29 
   5  21   4    2.49    1.00 
   7  21   4    1.71    1.07 
   7 -21   4    1.16    0.95 
   9 -21   4    6.52    1.48 
   9  21   4    4.42    1.40 
  11 -21   4    1.31    1.12 
  11  21   4    2.58    1.14 
  13 -21   4   86.55    4.16 
  13  21   4   88.26    4.08 
  15 -21   4    8.97    1.77 
  15  21   4   10.05    1.80 
  17  21   4    3.46    1.31 
  14 -22  -4    7.36    1.71 
  12 -22  -4    1.11    1.09 
  10 -22  -4    5.72    1.45 
   8 -22  -4   42.78    2.99 
   6 -22  -4    9.90    1.73 
   4 -22  -4   17.96    2.18 
   2 -22  -4   10.77    2.08 
  -2 -22   4    9.12    1.60 
   0 -22   4    1.47    0.97 
   2 -22   4    3.27    1.26 
   4 -22   4   37.72    2.83 
   6  22   4   12.74    1.99 
   6 -22   4   12.01    1.94 
   8  22   4   11.04    1.82 
   8 -22   4   12.96    2.04 
  10 -22   4   17.70    2.31 
  10  22   4   15.33    2.04 
  12  22   4    2.01    1.12 
   9 -23  -4   -0.01    0.95 
   7 -23  -4   -1.08    0.84 
   5 -23  -4    1.83    1.10 
   1 -23   4    3.75    1.24 
   3 -23   4    0.19    0.84 
   5 -23   4    2.85    1.19 
  48   0  -5    0.12    0.92 
  46   0  -5    1.93    0.98 
  44   0  -5    0.99    0.88 
  42   0  -5    0.08    0.78 
  40   0  -5    1.78    0.84 
  38   0  -5   -0.63    0.62 
  36   0  -5    1.02    0.71 
  34   0  -5    0.15    0.58 
  32   0  -5   -0.04    0.53 
  30   0  -5    0.12    0.55 
  30   0  -5   -0.03    0.39 
  28   0  -5   -0.34    0.38 
  28   0  -5    0.10    0.33 
  26   0  -5   -0.11    0.42 
  26   0  -5    0.24    0.35 
 -24   0   5   -0.14    0.30 
  24   0  -5   -0.33    0.35 
 -22   0   5    0.44    0.32 
  22   0  -5    0.05    0.35 
  20   0  -5   -0.05    0.32 
 -20   0   5    0.49    0.32 
 -18   0   5    0.04    0.26 
 -16   0   5    0.67    0.31 
 -14   0   5   -0.14    0.23 
 -12   0   5    0.45    0.29 
  10   0  -5    0.17    0.22 
 -10   0   5    1.44    0.35 
  -8   0   5   -0.03    0.21 
   8   0  -5    0.25    0.21 
   6   0  -5   -0.04    0.17 
  -6   0   5    0.29    0.23 
  -4   0   5    0.17    0.20 
   4   0  -5   -0.08    0.19 
  -4   0   5    0.84    0.17 
  -2   0   5   -0.13    0.20 
  -2   0   5   -0.10    0.12 
   2   0  -5    0.36    0.21 
   0   0   5   -0.16    0.19 
   0   0   5    0.06    0.17 
   2   0   5    0.36    0.26 
   2   0   5   -0.04    0.20 
   4   0   5   -0.01    0.22 
   4   0   5   -0.14    0.20 
   6   0   5   -0.09    0.21 
   6   0   5    0.05    0.22 
   8   0   5    0.18    0.28 
   8   0   5   -0.14    0.24 
  10   0   5   -0.32    0.20 
  10   0   5   -0.26    0.27 
  12   0   5    0.13    0.28 
  12   0   5    0.64    0.30 
  14   0   5    0.06    0.32 
  14   0   5    1.54    0.52 
  16   0   5   -0.28    0.29 
  16   0   5   -0.16    0.25 
  18   0   5   -0.46    0.34 
  18   0   5   -0.68    0.28 
  20   0   5    0.19    0.43 
  20   0   5    0.33    0.31 
  22   0   5   -0.41    0.45 
  22   0   5   -0.08    0.31 
  24   0   5   -0.22    0.51 
  24   0   5   -0.03    0.33 
  26   0   5    1.30    0.76 
  28   0   5    0.39    0.62 
  30   0   5    0.02    0.55 
  32   0   5    0.68    0.78 
  34   0   5    0.52    0.74 
  36   0   5   -0.46    0.75 
  38   0   5   -0.50    0.86 
  40   0   5   -0.84    0.72 
  42   0   5   -0.04    0.93 
  49   1  -5    6.08    1.69 
  47   1  -5    4.28    1.26 
  47  -1  -5    4.16    1.27 
  45   1  -5   -0.10    0.80 
  45  -1  -5    0.72    0.88 
  43   1  -5   77.36    3.62 
  43  -1  -5   78.32    3.65 
  41   1  -5   -0.28    0.70 
  41  -1  -5    0.40    0.72 
  39  -1  -5    4.16    1.07 
  39   1  -5    4.16    1.09 
  37   1  -5    5.72    1.14 
  37  -1  -5   10.12    1.50 
  35  -1  -5   13.38    1.58 
  35   1  -5   13.20    1.48 
  33   1  -5   -0.13    0.48 
  33  -1  -5   -0.12    0.52 
  31  -1  -5  132.26    3.88 
  31  -1  -5  128.70    3.12 
  31   1  -5  134.48    3.84 
  29   1  -5    1.76    0.66 
  29  -1  -5    1.51    0.62 
  29   1  -5    2.06    0.70 
  29  -1  -5    0.96    0.45 
  27   1  -5   10.66    0.82 
  27  -1  -5    9.95    1.12 
  27  -1  -5   11.03    0.90 
  27   1  -5   10.17    1.11 
  25  -1  -5   10.30    0.88 
  25   1  -5    7.24    0.92 
 -25  -1   5    7.69    0.73 
 -23   1   5   34.28    1.38 
 -23  -1   5   36.24    1.30 
  23  -1  -5   35.12    1.61 
  23   1  -5   35.65    1.57 
 -21  -1   5    0.13    0.28 
  21   1  -5    0.44    0.33 
 -21   1   5    0.41    0.36 
  19   1  -5 1485.20   19.55 
 -19  -1   5 1473.53   18.88 
 -19   1   5 1450.08   19.09 
 -17   1   5    2.02    0.43 
 -17  -1   5    1.54    0.34 
  17   1  -5    1.52    0.37 
 -15   1   5   11.74    0.77 
 -15  -1   5   12.64    0.74 
  15   1  -5   12.61    0.73 
  13   1  -5   64.19    1.70 
  13   1  -5   59.19    1.48 
 -13  -1   5   61.13    1.59 
 -13   1   5   62.56    1.70 
 -11   1   5   12.04    0.73 
  11   1  -5   12.49    0.71 
 -11  -1   5   12.04    0.71 
  -9   1   5    1.35    0.35 
   9  -1  -5    1.09    0.26 
   9   1  -5    1.01    0.29 
  -9  -1   5    0.86    0.29 
  -7   1   5   89.74    2.01 
   7  -1  -5   92.38    1.69 
  -7  -1   5   92.00    2.00 
   7   1  -5   90.52    1.85 
  -5   1   5    0.03    0.16 
   5  -1  -5    0.15    0.16 
  -5   1   5    0.23    0.22 
   5   1  -5    0.17    0.21 
  -5  -1   5    0.39    0.24 
   3  -1  -5    0.55    0.19 
  -3  -1   5    0.41    0.23 
  -3   1   5    0.45    0.26 
  -3   1   5    0.43    0.18 
   3   1  -5    0.28    0.22 
  -3  -1   5    0.36    0.11 
  -1   1   5    3.45    0.36 
  -1  -1   5    2.77    0.27 
  -1   1   5    1.47    0.31 
  -1  -1   5    3.40    0.45 
   1   1   5    2.95    0.38 
   1  -1   5    2.17    0.37 
   1   1   5    2.95    0.41 
   1  -1   5    2.06    0.28 
   3  -1   5    3.62    0.46 
   3   1   5    4.62    0.48 
   3   1   5    4.51    0.48 
   3  -1   5    4.20    0.42 
   5  -1   5 1579.31   20.00 
   5  -1   5 1507.42   19.83 
   5   1   5 1584.28   20.18 
   5   1   5 1552.98   19.67 
   7  -1   5    3.25    0.45 
   7   1   5    4.10    0.56 
   7  -1   5    3.63    0.47 
   7   1   5    3.63    0.45 
   9  -1   5   12.43    0.77 
   9   1   5   13.78    0.88 
   9   1   5   13.85    0.73 
   9  -1   5   12.44    0.81 
  11  -1   5   22.35    1.02 
  11   1   5   19.03    0.86 
  11  -1   5   19.66    1.07 
  11   1   5   19.24    1.10 
  13  -1   5   -0.02    0.33 
  13   1   5    0.19    0.33 
  13   1   5   -0.18    0.22 
  13  -1   5    0.29    0.30 
  15  -1   5   15.17    1.10 
  15  -1   5   13.87    0.89 
  15   1   5   14.96    0.82 
  15   1   5   13.37    1.04 
  17  -1   5  183.88    3.58 
  17   1   5  188.53    4.27 
  17  -1   5  182.32    4.19 
  17   1   5  189.10    3.38 
  19  -1   5    2.16    0.50 
  19   1   5    2.05    0.43 
  19  -1   5    1.56    0.60 
  19   1   5    2.60    0.71 
  21   1   5    0.38    0.49 
  21  -1   5   -0.47    0.38 
  21   1   5    0.12    0.28 
  21  -1   5    0.02    0.34 
  23   1   5    1.98    0.43 
  23  -1   5    2.33    0.53 
  23   1   5    3.31    0.83 
  23  -1   5    1.99    0.70 
  25   1   5    8.69    1.19 
  25  -1   5   11.46    0.94 
  25  -1   5   10.22    1.29 
  27   1   5   19.05    1.70 
  27  -1   5   22.29    1.78 
  29   1   5   74.58    3.19 
  29  -1   5   70.64    3.12 
  31  -1   5    1.04    0.74 
  31   1   5    1.17    0.80 
  33  -1   5    1.79    0.87 
  33   1   5    2.97    1.01 
  35   1   5   16.68    2.05 
  35  -1   5   11.78    1.64 
  37   1   5    4.47    1.33 
  37  -1   5    5.94    1.40 
  39   1   5   11.69    1.83 
  39  -1   5   12.50    1.95 
  41   1   5    9.70    1.74 
  41  -1   5    7.17    1.61 
  48   2  -5    5.80    1.48 
  48  -2  -5    7.37    1.66 
  46  -2  -5   14.70    2.00 
  46   2  -5   13.11    1.83 
  44   2  -5   14.17    1.85 
  44  -2  -5   13.77    1.86 
  42   2  -5   25.07    2.16 
  42  -2  -5   28.44    2.33 
  40   2  -5   30.48    2.24 
  40  -2  -5   33.28    2.36 
  38  -2  -5   -1.13    0.60 
  38   2  -5   -0.77    0.54 
  36   2  -5    4.72    1.05 
  36  -2  -5    6.50    1.15 
  34   2  -5   94.93    3.35 
  34  -2  -5   94.80    3.45 
  32  -2  -5   23.40    1.39 
  32   2  -5   24.92    1.77 
  32  -2  -5   25.65    1.79 
  30  -2  -5   59.79    2.10 
  30  -2  -5   62.21    2.59 
  30   2  -5   60.89    2.46 
  28   2  -5    0.64    0.49 
  28  -2  -5    0.51    0.41 
  28  -2  -5    0.79    0.56 
 -26  -2   5   -0.20    0.29 
  26  -2  -5    0.32    0.42 
  26   2  -5    0.29    0.43 
  26  -2  -5   -0.20    0.34 
 -24  -2   5   25.04    1.05 
  24  -2  -5   25.64    1.28 
  24   2  -5   21.70    1.31 
  22   2  -5  642.04    9.72 
 -22  -2   5  645.86    8.92 
 -22   2   5  630.68    9.36 
 -20   2   5    4.17    0.61 
 -20  -2   5    5.00    0.56 
  20   2  -5    4.31    0.62 
 -18   2   5   99.73    2.44 
 -18  -2   5  100.47    2.19 
  18   2  -5  106.10    2.42 
 -16   2   5  111.31    2.53 
  16   2  -5  109.64    2.36 
  16   2  -5  111.67    2.60 
 -16  -2   5  111.80    2.31 
 -14   2   5    6.02    0.62 
  14   2  -5    7.13    0.69 
  14   2  -5    7.43    0.55 
 -14  -2   5    6.67    0.57 
 -12   2   5    3.57    0.51 
 -12  -2   5    3.01    0.42 
  12   2  -5    2.84    0.35 
  12   2  -5    3.34    0.48 
 -10  -2   5 1604.21   20.35 
 -10   2   5 1622.18   20.54 
  10   2  -5 1582.44   20.06 
  10   2  -5 1611.83   19.98 
   8   2  -5    5.21    0.52 
   8   2  -5    4.88    0.28 
  -8   2   5    5.86    0.58 
   8  -2  -5    5.35    0.38 
  -8  -2   5    4.43    0.48 
  -6  -2   5   18.91    0.86 
   6   2  -5   17.63    0.79 
  -6   2   5   17.59    0.85 
   6  -2  -5   18.10    0.58 
   4   2  -5  138.98    2.54 
   4  -2  -5  138.99    2.07 
  -4   2   5  139.34    2.47 
  -2  -2   5    2.74    0.44 
   2   2  -5    2.67    0.40 
  -2   2   5    2.48    0.37 
  -2   2   5    1.95    0.34 
  -2  -2   5    2.78    0.19 
   0  -2   5   10.36    0.43 
   0  -2   5    9.78    0.70 
   0   2   5    9.38    0.63 
   0   2   5   10.74    0.67 
   2  -2   5 3576.26   46.38 
   2   2   5 3506.98   44.22 
   2  -2   5 3496.28   45.77 
   2   2   5 3482.88   46.88 
   4   2   5    0.23    0.27 
   4   2   5    0.11    0.28 
   4  -2   5    0.00    0.32 
   4  -2   5    0.13    0.22 
   6  -2   5    2.70    0.45 
   6   2   5    3.09    0.51 
   6  -2   5    2.17    0.37 
   6   2   5    2.40    0.38 
   8  -2   5   31.22    1.18 
   8   2   5   31.20    1.04 
   8  -2   5   30.86    1.22 
   8   2   5   29.14    1.26 
  10   2   5    2.44    0.38 
  10  -2   5    2.49    0.47 
  10   2   5    2.12    0.49 
  10  -2   5    2.01    0.44 
  12   2   5    6.29    0.57 
  12  -2   5    4.96    0.62 
  12  -2   5    6.53    0.73 
  12   2   5    5.39    0.71 
  14  -2   5 1640.82   21.86 
  14   2   5 1614.32   20.51 
  14   2   5 1638.02   22.05 
  14  -2   5 1606.86   21.09 
  16  -2   5    3.98    0.64 
  16  -2   5    3.37    0.68 
  16   2   5    3.23    0.45 
  16   2   5    4.78    0.79 
  18  -2   5   67.20    2.36 
  18   2   5   69.23    1.70 
  18  -2   5   69.67    2.07 
  18   2   5   68.16    2.46 
  20   2   5  115.62    2.35 
  20  -2   5  115.45    2.80 
  20   2   5  112.68    3.36 
  20  -2   5  113.19    3.32 
  22   2   5    4.34    0.86 
  22   2   5    4.64    0.54 
  22  -2   5    4.33    0.89 
  22  -2   5    3.63    0.65 
  24   2   5    3.29    0.82 
  24  -2   5    2.39    0.74 
  24  -2   5    2.84    0.65 
  26  -2   5  561.38    8.59 
  26   2   5  551.43   10.06 
  26  -2   5  521.98    9.81 
  28  -2   5    8.59    1.28 
  28   2   5    8.32    1.32 
  30  -2   5   18.45    1.92 
  30   2   5   16.53    1.95 
  32  -2   5   17.87    1.97 
  32   2   5   23.11    2.03 
  34   2   5    7.36    1.44 
  34  -2   5    7.20    1.38 
  36  -2   5    0.44    0.84 
  36   2   5   -0.56    0.63 
  38  -2   5  228.90    6.74 
  38   2   5  241.30    6.88 
  40   2   5    0.66    0.81 
  40  -2   5   -0.39    0.76 
  42  -2   5   12.23    2.12 
  42   2   5   11.27    2.00 
  49   3  -5   13.46    2.15 
  47  -3  -5    8.85    1.66 
  47   3  -5    9.25    1.60 
  45  -3  -5    0.69    0.89 
  45   3  -5    1.63    0.98 
  43  -3  -5  173.14    5.61 
  43   3  -5  167.77    5.35 
  41  -3  -5    7.31    1.39 
  41   3  -5    8.53    1.44 
  39  -3  -5   18.37    2.01 
  39   3  -5   16.19    1.79 
  37   3  -5   32.28    2.13 
  37  -3  -5   29.13    2.19 
  35  -3  -5   19.07    1.70 
  35   3  -5   17.48    1.72 
  33   3  -5    1.89    0.72 
  33  -3  -5    2.14    0.66 
  33  -3  -5    1.34    0.65 
  31  -3  -5  662.88   10.23 
  31   3  -5  663.58   11.01 
  31  -3  -5  650.27   11.22 
  29  -3  -5    3.20    0.82 
  29   3  -5    4.41    0.83 
  29  -3  -5    3.81    0.75 
  27   3  -5    1.98    0.61 
  27  -3  -5    3.38    0.67 
 -25  -3   5  241.91    4.21 
  25   3  -5  238.10    4.87 
  25  -3  -5  237.05    4.66 
  23   3  -5   68.51    2.20 
 -23  -3   5   68.00    1.71 
  23  -3  -5   71.05    2.17 
  21   3  -5    6.17    0.74 
 -21  -3   5    5.84    0.57 
 -19  -3   5 1729.38   21.80 
 -19   3   5 1718.88   22.45 
  19   3  -5 1726.92   22.59 
  17   3  -5   16.73    1.03 
 -17  -3   5   16.90    0.81 
 -17   3   5   14.60    0.95 
  17   3  -5   15.11    0.86 
 -15   3   5   15.61    0.94 
  15   3  -5   14.76    0.94 
 -15  -3   5   15.62    0.80 
  15   3  -5   14.46    0.77 
  13   3  -5  264.20    4.55 
  13   3  -5  275.09    4.18 
 -13   3   5  275.28    4.67 
 -13  -3   5  269.70    4.33 
 -11  -3   5   13.31    0.74 
 -11   3   5   13.80    0.83 
  11   3  -5   13.56    0.82 
  11   3  -5   14.21    0.58 
   9   3  -5    0.16    0.23 
   9   3  -5    0.17    0.14 
  -9  -3   5    0.07    0.21 
  -9   3   5    0.42    0.30 
   7   3  -5 2461.23   30.40 
  -7   3   5 2484.98   30.66 
  -7  -3   5 2407.27   33.21 
   7  -3  -5 2451.49   29.86 
  -5  -3   5    0.69    0.28 
  -5   3   5    0.67    0.31 
   5   3  -5    0.20    0.23 
  -5   3   5    0.59    0.26 
   5  -3  -5    0.86    0.16 
  -3  -3   5    7.24    0.70 
  -3   3   5    4.81    0.48 
  -3   3   5    6.10    0.58 
   3   3  -5    7.01    0.59 
  -1  -3   5  379.55    4.99 
  -1   3   5  377.31    5.73 
  -1   3   5  385.21    5.70 
  -1  -3   5  380.25    5.83 
   1   3  -5  382.84    5.63 
   1   3   5   27.72    1.02 
   1   3   5   26.09    1.05 
   1  -3   5   32.38    1.20 
   1  -3   5   29.21    0.79 
   3   3   5    0.26    0.27 
   3  -3   5    0.50    0.22 
   3   3   5    0.44    0.29 
   3  -3   5    0.57    0.31 
   5  -3   5 1638.23   21.10 
   5   3   5 1635.76   21.60 
   5  -3   5 1666.84   21.28 
   5   3   5 1666.29   20.82 
   7  -3   5    0.36    0.32 
   7   3   5    0.04    0.21 
   7   3   5    0.50    0.30 
   7  -3   5    0.16    0.23 
   9   3   5    3.19    0.40 
   9   3   5    2.85    0.55 
   9  -3   5    3.02    0.52 
   9  -3   5    3.07    0.47 
  11   3   5   55.57    1.92 
  11  -3   5   55.31    1.76 
  11   3   5   52.86    1.37 
  11  -3   5   52.11    1.73 
  13  -3   5   47.58    1.69 
  13  -3   5   49.19    1.78 
  13   3   5   48.67    1.33 
  13   3   5   49.70    1.93 
  15  -3   5    6.73    0.86 
  15  -3   5    6.92    0.79 
  15   3   5    4.69    0.78 
  15   3   5    6.35    0.54 
  17   3   5  884.09   13.52 
  17  -3   5  914.25   13.35 
  17   3   5  880.53   11.72 
  17  -3   5  912.16   12.72 
  19   3   5   19.54    0.82 
  19   3   5   20.69    1.40 
  19  -3   5   17.99    1.36 
  19  -3   5   17.57    1.15 
  21  -3   5    1.96    0.58 
  21   3   5    1.88    0.70 
  21  -3   5    1.69    0.59 
  23   3   5   11.50    1.35 
  23  -3   5   12.63    1.37 
  23  -3   5   13.20    1.08 
  25  -3   5   30.51    1.94 
  25   3   5   28.75    1.94 
  25  -3   5   30.66    1.57 
  27  -3   5    9.85    1.07 
  27  -3   5    9.27    1.28 
  27   3   5   10.16    1.37 
  29   3   5  175.39    5.12 
  29  -3   5  179.70    5.07 
  31  -3   5   17.90    1.90 
  31   3   5   17.75    1.87 
  33   3   5   -0.20    0.62 
  33  -3   5    0.42    0.81 
  35  -3   5   11.00    1.66 
  35   3   5   12.27    1.74 
  37   3   5   28.58    2.40 
  37  -3   5   27.12    2.42 
  39   3   5    5.75    1.52 
  39  -3   5    8.60    1.67 
  41  -3   5   23.75    2.52 
  41   3   5   22.79    2.56 
  48   4  -5    5.67    1.42 
  46  -4  -5    0.49    1.02 
  46   4  -5    2.91    1.02 
  44   4  -5    3.23    1.17 
  44  -4  -5    4.99    1.33 
  42  -4  -5    5.23    1.25 
  42   4  -5    6.75    1.36 
  40   4  -5    4.51    1.17 
  40  -4  -5    6.24    1.35 
  38  -4  -5    1.11    0.81 
  38   4  -5    0.31    0.68 
  36   4  -5   11.90    1.46 
  36  -4  -5   16.13    1.80 
  34   4  -5    1.36    0.68 
  34  -4  -5    1.17    0.76 
  34  -4  -5    1.96    0.65 
  32   4  -5    1.01    0.64 
  32  -4  -5    0.58    0.53 
  32  -4  -5    1.39    0.68 
  30  -4  -5   20.97    1.41 
  30   4  -5   21.06    1.57 
  28  -4  -5    0.25    0.46 
  28   4  -5    1.09    0.52 
  26  -4  -5    1.68    0.60 
  26   4  -5    2.21    0.60 
  24   4  -5   11.88    1.01 
  24  -4  -5    8.81    1.02 
  22  -4  -5   47.36    1.80 
  22   4  -5   44.88    1.85 
 -22  -4   5   43.38    1.30 
  22   4  -5   44.81    1.70 
  20   4  -5    0.35    0.39 
 -20  -4   5    0.13    0.24 
  20   4  -5    0.07    0.32 
  18   4  -5   48.68    1.57 
  18   4  -5   52.39    1.86 
 -18  -4   5   51.15    1.41 
 -18   4   5   47.59    1.74 
  16   4  -5    0.64    0.41 
 -16   4   5    0.99    0.46 
  16   4  -5    0.39    0.30 
 -16  -4   5    0.65    0.29 
  14   4  -5    1.02    0.42 
 -14  -4   5    0.11    0.22 
  14   4  -5    0.31    0.24 
 -14   4   5    0.67    0.36 
  12   4  -5   24.63    1.15 
 -12   4   5   26.30    1.20 
  12   4  -5   25.61    0.86 
 -12  -4   5   24.32    0.99 
  10   4  -5  127.85    2.14 
 -10  -4   5  130.33    2.59 
 -10   4   5  130.37    2.81 
  10   4  -5  125.88    2.69 
  -8   4   5   56.03    1.66 
   8   4  -5   56.76    1.62 
   8   4  -5   58.26    1.05 
  -8  -4   5   54.14    1.54 
  -6   4   5   32.98    1.18 
   6   4  -5   33.53    1.20 
   6   4  -5   33.24    0.61 
  -6   4   5   32.47    1.22 
  -6  -4   5   31.62    1.18 
   6  -4  -5   30.55    0.64 
  -4   4   5   66.27    1.76 
  -4  -4   5   65.42    1.77 
   4   4  -5   64.83    1.72 
  -4   4   5   65.34    1.71 
  -2  -4   5   39.60    1.37 
  -2   4   5   37.24    1.28 
  -2   4   5   38.29    1.28 
   2   4  -5   40.82    1.34 
   0   4   5   14.51    0.85 
   0  -4   5   15.18    0.87 
   0   4   5   14.82    0.80 
   2   4   5  690.59    9.79 
   2   4   5  679.04    9.34 
   2  -4   5  681.82    9.72 
   4   4   5    2.76    0.41 
   4   4   5    3.42    0.55 
   4  -4   5    3.10    0.54 
   6  -4   5    1.21    0.32 
   6   4   5    1.76    0.46 
   6   4   5    1.75    0.34 
   6  -4   5    1.81    0.47 
   8  -4   5  138.37    2.86 
   8   4   5  139.91    2.59 
   8  -4   5  140.97    3.11 
   8   4   5  142.21    3.22 
  10  -4   5    5.74    0.66 
  10  -4   5    5.52    0.69 
  10   4   5    5.13    0.75 
  10   4   5    5.37    0.52 
  12   4   5    4.82    0.49 
  12   4   5    6.67    0.86 
  12  -4   5    5.03    0.71 
  12  -4   5    4.93    0.72 
  14   4   5  395.74    5.78 
  14  -4   5  403.83    6.73 
  14   4   5  416.65    7.22 
  14  -4   5  410.55    6.91 
  16  -4   5    5.94    0.79 
  16  -4   5    7.65    0.95 
  16   4   5    5.89    0.53 
  16   4   5    6.26    0.99 
  18  -4   5   -0.66    0.35 
  18   4   5    0.07    0.48 
  18   4   5    0.09    0.23 
  18  -4   5   -1.19    0.35 
  20  -4   5  113.97    3.35 
  20   4   5  114.95    3.50 
  20  -4   5  117.79    3.07 
  22  -4   5    4.81    0.90 
  22  -4   5    4.27    0.78 
  22   4   5    4.72    0.92 
  24  -4   5   -0.31    0.37 
  24  -4   5   -0.27    0.44 
  24   4   5   -0.13    0.46 
  26   4   5  119.22    3.97 
  26  -4   5  126.72    3.35 
  26  -4   5  119.59    3.87 
  28  -4   5   -0.19    0.48 
  28  -4   5    0.63    0.63 
  28   4   5   -0.77    0.47 
  30   4   5    3.05    0.95 
  30  -4   5    5.68    1.16 
  32   4   5   54.19    2.98 
  32  -4   5   55.32    2.94 
  34   4   5   -0.18    0.70 
  34  -4   5    0.11    0.72 
  36   4   5    0.23    0.78 
  36  -4   5   -0.01    0.72 
  38  -4   5   41.34    2.95 
  38   4   5   44.58    2.96 
  40   4   5   -0.06    0.86 
  40  -4   5   -0.02    0.87 
  42  -4   5    0.17    0.86 
  42   4   5   -0.48    1.02 
  47  -5  -5    1.26    1.57 
  47   5  -5    1.71    1.23 
  45  -5  -5    0.38    0.82 
  45   5  -5    1.00    0.84 
  43  -5  -5    1.33    0.97 
  43   5  -5    0.59    0.87 
  41  -5  -5    1.04    0.89 
  41   5  -5    0.62    0.75 
  39   5  -5    2.69    0.88 
  39  -5  -5    2.10    0.97 
  37   5  -5    9.77    1.39 
  37  -5  -5   11.77    1.66 
  35   5  -5    7.07    1.20 
  35  -5  -5    7.15    1.29 
  35  -5  -5    6.75    1.05 
  33  -5  -5   -0.03    0.59 
  33   5  -5    0.46    0.55 
  33  -5  -5    0.40    0.60 
  31  -5  -5    9.72    1.16 
  31   5  -5   11.08    1.28 
  29   5  -5    1.96    0.68 
  29  -5  -5    1.37    0.59 
  27   5  -5    2.26    0.67 
  27  -5  -5    2.17    0.67 
  27   5  -5    2.26    0.63 
  25   5  -5   29.89    1.53 
  25  -5  -5   27.10    1.54 
  25   5  -5   29.50    1.65 
  23   5  -5   20.82    1.38 
  23  -5  -5   23.71    1.40 
  23   5  -5   21.58    1.28 
  21   5  -5    3.83    0.60 
 -21  -5   5    3.87    0.48 
  21  -5  -5    6.46    0.86 
  21   5  -5    3.96    0.73 
  19  -5  -5    5.26    0.75 
  19   5  -5    7.55    0.91 
  19   5  -5    7.27    0.75 
 -19  -5   5    7.53    0.59 
 -17  -5   5    9.82    0.65 
  17   5  -5   10.13    0.96 
  17   5  -5   10.03    0.76 
 -15   5   5   47.07    1.70 
  15   5  -5   49.10    1.43 
  15   5  -5   48.75    1.74 
 -15  -5   5   46.52    1.38 
 -13   5   5   99.86    2.57 
  13   5  -5  101.27    2.06 
 -13  -5   5  101.78    2.22 
  13   5  -5  100.39    2.51 
  11   5  -5    6.36    0.71 
 -11   5   5    4.60    0.63 
 -11  -5   5    5.36    0.60 
  11   5  -5    5.53    0.46 
   9   5  -5   11.34    0.81 
  -9   5   5   11.28    0.80 
  -9  -5   5   11.90    0.77 
   9   5  -5   10.35    0.49 
   7   5  -5  283.53    4.70 
  -7   5   5  282.59    4.81 
  -7  -5   5  281.87    4.70 
   7   5  -5  280.42    3.88 
  -5  -5   5    0.06    0.27 
  -5   5   5    0.59    0.32 
   5   5  -5    0.27    0.31 
  -5   5   5    0.19    0.25 
  -3  -5   5   17.87    0.98 
   3   5  -5   18.56    0.97 
  -3   5   5   18.20    0.93 
  -3   5   5   19.83    0.97 
  -1   5   5   90.21    2.22 
  -1  -5   5   89.02    2.25 
   1   5  -5   90.29    2.20 
  -1   5   5   86.68    2.08 
   1   5   5   32.60    1.19 
   1   5   5   30.42    1.25 
   1  -5   5   32.69    1.32 
   3   5   5   12.28    0.85 
   3   5   5   13.05    0.77 
   3  -5   5   11.97    0.86 
   5   5   5  100.86    2.57 
   5   5   5  100.23    2.14 
   7   5   5   16.98    0.80 
   7   5   5   18.05    1.08 
   7  -5   5   16.00    1.04 
   9  -5   5    9.25    0.94 
   9   5   5    9.65    0.96 
   9   5   5    9.89    0.63 
  11  -5   5  146.78    3.38 
  11   5   5  155.09    2.72 
  11  -5   5  151.23    3.29 
  11   5   5  150.19    3.58 
  13  -5   5    0.99    0.47 
  13   5   5    0.25    0.27 
  13   5   5    0.59    0.45 
  13  -5   5    0.45    0.42 
  15   5   5   20.32    1.42 
  15   5   5   20.41    0.82 
  15  -5   5   19.43    1.25 
  15  -5   5   21.41    1.31 
  17  -5   5  105.76    2.93 
  17  -5   5  106.52    3.05 
  17   5   5  107.35    2.03 
  17   5   5  113.20    3.32 
  19   5   5   15.85    1.39 
  19  -5   5   14.84    1.26 
  19  -5   5   13.21    1.16 
  21  -5   5    0.30    0.48 
  21  -5   5    0.44    0.49 
  21   5   5   -0.07    0.56 
  23   5   5    3.18    0.81 
  23  -5   5    3.11    0.74 
  23  -5   5    3.45    0.86 
  25  -5   5    2.72    0.73 
  25   5   5    3.21    0.90 
  25  -5   5    2.31    0.82 
  27  -5   5   15.75    1.35 
  27  -5   5   14.68    1.61 
  27   5   5   14.61    1.65 
  29  -5   5    5.41    1.08 
  29   5   5    4.84    1.19 
  29  -5   5    4.91    0.92 
  31  -5   5    1.92    0.88 
  31   5   5    5.42    1.26 
  33  -5   5    0.38    0.74 
  33   5   5    1.01    0.87 
  35   5   5    5.09    1.31 
  35  -5   5    4.61    1.16 
  37   5   5    0.13    0.76 
  37  -5   5    1.16    0.95 
  39   5   5    4.37    1.23 
  39  -5   5    6.26    1.51 
  41   5   5    8.80    1.69 
  41  -5   5   11.32    1.96 
  46  -6  -5   11.97    1.92 
  44   6  -5   31.72    2.50 
  44  -6  -5   32.31    2.68 
  44   6  -5   32.38    2.47 
  42  -6  -5    2.60    1.12 
  42   6  -5    2.02    1.01 
  42   6  -5    3.59    1.14 
  40   6  -5   14.06    1.72 
  40  -6  -5   16.11    2.04 
  40   6  -5   12.84    1.74 
  38   6  -5    2.87    0.96 
  38  -6  -5    4.80    1.18 
  38   6  -5    1.42    0.86 
  36  -6  -5    0.21    0.73 
  36   6  -5   -0.19    0.66 
  36  -6  -5   -0.85    0.64 
  36   6  -5    0.96    0.67 
  34  -6  -5   66.60    2.68 
  34   6  -5   69.04    2.86 
  34   6  -5   66.12    2.92 
  32   6  -5   34.23    1.97 
  32  -6  -5   28.94    1.85 
  32   6  -5   31.59    1.98 
  30   6  -5   12.61    1.39 
  30  -6  -5   12.50    1.33 
  30   6  -5   12.19    1.29 
  28   6  -5   33.94    1.92 
  28   6  -5   33.14    1.75 
  28  -6  -5   36.22    1.85 
  26   6  -5    0.42    0.45 
  26  -6  -5    0.29    0.50 
  26   6  -5    0.01    0.48 
  24  -6  -5    7.81    1.05 
  24   6  -5    9.93    1.04 
  24   6  -5    8.75    1.08 
  22  -6  -5  327.52    6.12 
  22   6  -5  331.96    6.16 
  22   6  -5  327.16    5.82 
  20   6  -5   29.53    1.56 
  20  -6  -5   30.12    1.58 
  20   6  -5   32.66    1.41 
 -20  -6   5   28.33    1.08 
  18  -6  -5    4.74    0.75 
 -18  -6   5    4.17    0.50 
  18   6  -5    4.74    0.62 
  18   6  -5    4.72    0.78 
  16   6  -5  113.71    2.50 
  16   6  -5  112.15    2.88 
  16  -6  -5  115.81    2.95 
 -16  -6   5  111.91    2.38 
 -14   6   5   10.68    0.94 
  14   6  -5    9.78    0.69 
  14   6  -5   12.44    1.09 
 -14  -6   5   10.33    0.73 
 -12   6   5    1.31    0.44 
 -12  -6   5    0.95    0.35 
  12   6  -5    1.42    0.33 
  12   6  -5    0.73    0.39 
  10   6  -5  734.85    9.77 
 -10  -6   5  732.75   10.27 
  10   6  -5  732.57   10.35 
 -10   6   5  746.68   10.67 
  -8   6   5    5.81    0.67 
  -8  -6   5    8.92    0.72 
   8   6  -5    8.08    0.47 
   8   6  -5    7.64    0.77 
   6   6  -5    0.21    0.17 
  -6   6   5    0.75    0.33 
  -6   6   5    0.36    0.30 
  -6  -6   5    0.40    0.33
[truncated: 680,826 more chars]
