# Supplementary material
Source: MDPI journal article supplement (https://www.mdpi.com/2073-4352/8/5/221)
Supplement: s1 [file s1 › supplementary/comp_II.cif]

 
data_II 
  
_audit_creation_method            'SHELXL-2016/4' 
_shelx_SHELXL_version_number      '2016/4' 
_chemical_name_systematic         ? 
_chemical_name_common             ? 
_chemical_melting_point           ? 
_chemical_formula_moiety          ? 
_chemical_formula_sum 
 'C34 H58.12 Cd5 N10 O9.06' 
_chemical_formula_weight          1314.03 
  
loop_ 
 _atom_type_symbol 
 _atom_type_description 
 _atom_type_scat_dispersion_real 
 _atom_type_scat_dispersion_imag 
 _atom_type_scat_source 
 'C'  'C'   0.0033   0.0016 
 'International Tables Vol C Tables 4.2.6.8 and 6.1.1.4' 
 'H'  'H'   0.0000   0.0000 
 'International Tables Vol C Tables 4.2.6.8 and 6.1.1.4' 
 'N'  'N'   0.0061   0.0033 
 'International Tables Vol C Tables 4.2.6.8 and 6.1.1.4' 
 'O'  'O'   0.0106   0.0060 
 'International Tables Vol C Tables 4.2.6.8 and 6.1.1.4' 
 'Cd'  'Cd'  -0.8075   1.2024 
 'International Tables Vol C Tables 4.2.6.8 and 6.1.1.4' 
  
_space_group_crystal_system       monoclinic 
_space_group_IT_number            15 
_space_group_name_H-M_alt         'I 2/a' 
_space_group_name_Hall            '-I 2ya' 
  
_shelx_space_group_comment 
; 
The symmetry employed for this shelxl refinement is uniquely defined 
by the following loop, which should always be used as a source of 
symmetry information in preference to the above space-group names. 
They are only intended as comments. 
; 
  
loop_ 
 _space_group_symop_operation_xyz 
 'x, y, z' 
 '-x+1/2, y, -z' 
 'x+1/2, y+1/2, z+1/2' 
 '-x+1, y+1/2, -z+1/2' 
 '-x, -y, -z' 
 'x-1/2, -y, z' 
 '-x+1/2, -y+1/2, -z+1/2' 
 'x, -y+1/2, z+1/2' 
  
_cell_length_a                    21.8261(7) 
_cell_length_b                    8.8155(3) 
_cell_length_c                    27.1515(12) 
_cell_angle_alpha                 90 
_cell_angle_beta                  94.2899(4) 
_cell_angle_gamma                 90 
_cell_volume                      5209.5(3) 
_cell_formula_units_Z             4 
_cell_measurement_temperature     90 
_cell_measurement_reflns_used     9870 
_cell_measurement_theta_min       2.49 
_cell_measurement_theta_max       31.26 
  
_exptl_crystal_description        block 
_exptl_crystal_colour             colorless 
_exptl_crystal_density_meas       ? 
_exptl_crystal_density_method     ? 
_exptl_crystal_density_diffrn     1.675 
_exptl_crystal_F_000              2578 
_exptl_transmission_factor_min    ? 
_exptl_transmission_factor_max    ? 
_exptl_crystal_size_max           0.270 
_exptl_crystal_size_mid           0.240 
_exptl_crystal_size_min           0.200 
_exptl_absorpt_coefficient_mu     2.059 
_shelx_estimated_absorpt_T_min    0.606 
_shelx_estimated_absorpt_T_max    0.684 
_exptl_absorpt_correction_type    multi-scan 
_exptl_absorpt_correction_T_min   0.63 
_exptl_absorpt_correction_T_max   0.68 
_exptl_absorpt_process_details    'SADABS V2014/5 (Bruker AXS Inc.)' 
_exptl_absorpt_special_details    ? 
_diffrn_ambient_temperature       90 
_diffrn_radiation_wavelength      0.71073 
_diffrn_radiation_type            MoK\a 
_diffrn_source                    ? 
_diffrn_measurement_device_type   'Bruker APEX-II CCD' 
_diffrn_measurement_method        '\f and \w scans' 
_diffrn_detector_area_resol_mean  8.333 
_diffrn_reflns_number             19666 
_diffrn_reflns_av_unetI/netI      0.0153 
_diffrn_reflns_av_R_equivalents   0.0127 
_diffrn_reflns_limit_h_min        -30 
_diffrn_reflns_limit_h_max        24 
_diffrn_reflns_limit_k_min        -12 
_diffrn_reflns_limit_k_max        12 
_diffrn_reflns_limit_l_min        -34 
_diffrn_reflns_limit_l_max        38 
_diffrn_reflns_theta_min          1.871 
_diffrn_reflns_theta_max          31.372 
_diffrn_reflns_theta_full         25.242 
_diffrn_measured_fraction_theta_max   0.923 
_diffrn_measured_fraction_theta_full  1.000 
_diffrn_reflns_Laue_measured_fraction_max    0.923 
_diffrn_reflns_Laue_measured_fraction_full   1.000 
_diffrn_reflns_point_group_measured_fraction_max   0.923 
_diffrn_reflns_point_group_measured_fraction_full  1.000 
_reflns_number_total              7912 
_reflns_number_gt                 7297 
_reflns_threshold_expression      'I > 2\s(I)' 
_reflns_Friedel_coverage          0.000 
_reflns_Friedel_fraction_max      . 
_reflns_Friedel_fraction_full     . 
  
_reflns_special_details 
; 
 Reflections were merged by SHELXL according to the crystal 
 class for the calculation of statistics and refinement. 
  
 _reflns_Friedel_fraction is defined as the number of unique 
 Friedel pairs measured divided by the number that would be 
 possible theoretically, ignoring centric projections and 
 systematic absences. 
; 
  
_computing_data_collection        'Bruker APEX2' 
_computing_cell_refinement        'Bruker SAINT' 
_computing_data_reduction         'Bruker SAINT' 
_computing_structure_solution     'SHELXS-97 (Sheldrick 2008)' 
_computing_structure_refinement 'SHELXL-2016/4 (Sheldrick, 2016)' 
_computing_molecular_graphics     'Bruker SHELXTL' 
_computing_publication_material   'Bruker SHELXTL' 
_refine_special_details           ? 
_refine_ls_structure_factor_coef  Fsqd 
_refine_ls_matrix_type            full 
_refine_ls_weighting_scheme       calc 
_refine_ls_weighting_details 
'w=1/[\s^2^(Fo^2^)+(0.0286P)^2^+18.1247P] where P=(Fo^2^+2Fc^2^)/3' 
_atom_sites_solution_primary      ? 
_atom_sites_solution_secondary    ? 
_atom_sites_solution_hydrogens    mixed 
_refine_ls_hydrogen_treatment     mixed 
_refine_ls_extinction_method      none 
_refine_ls_extinction_coef        . 
_refine_ls_number_reflns          7912 
_refine_ls_number_parameters      319 
_refine_ls_number_restraints      7 
_refine_ls_R_factor_all           0.0284 
_refine_ls_R_factor_gt            0.0256 
_refine_ls_wR_factor_ref          0.0655 
_refine_ls_wR_factor_gt           0.0636 
_refine_ls_goodness_of_fit_ref    1.054 
_refine_ls_restrained_S_all       1.105 
_refine_ls_shift/su_max           0.004 
_refine_ls_shift/su_mean          0.000 
  
loop_ 
 _atom_site_label 
 _atom_site_type_symbol 
 _atom_site_fract_x 
 _atom_site_fract_y 
 _atom_site_fract_z 
 _atom_site_U_iso_or_equiv 
 _atom_site_adp_type 
 _atom_site_occupancy 
 _atom_site_site_symmetry_order 
 _atom_site_calc_flag 
 _atom_site_refinement_flags_posn 
 _atom_site_refinement_flags_adp 
 _atom_site_refinement_flags_occupancy 
 _atom_site_disorder_assembly 
 _atom_site_disorder_group 
CD1 Cd -0.05385(2) 1.20294(2) 0.89660(2) 0.01605(4) Uani 1 1 d . . . . . 
CD2 Cd 0.10520(2) 0.69830(2) 0.90992(2) 0.01585(4) Uani 1 1 d . . . . . 
CD3 Cd 0.250000 0.750000 0.750000 0.02905(6) Uani 1 2 d S . P D . 
N1 N 0.03287(9) 0.8914(2) 0.89377(7) 0.0229(4) Uani 1 1 d . . . . . 
N2 N 0.04400(9) 0.4989(2) 0.89868(7) 0.0254(4) Uani 1 1 d . . . . . 
N3 N 0.10424(9) 0.7540(2) 0.98940(7) 0.0241(4) Uani 1 1 d . . . . . 
N4 N 0.18482(10) 0.7594(3) 0.81222(8) 0.0323(5) Uani 1 1 d . . . . . 
N5 N 0.33051(10) 0.7623(3) 0.81007(8) 0.0310(4) Uani 1 1 d . . . . . 
C1 C 0.00219(9) 0.9966(2) 0.89421(7) 0.0185(4) Uani 1 1 d . . . . . 
C2 C 0.00983(9) 1.3990(2) 0.89565(8) 0.0193(4) Uani 1 1 d . . . . . 
C3 C -0.09019(9) 1.2264(2) 0.97100(7) 0.0165(3) Uani 1 1 d . . . . . 
C4 C 0.15885(10) 0.7462(3) 0.84678(8) 0.0225(4) Uani 1 1 d . . . . . 
C5 C -0.13011(10) 1.2266(3) 0.83986(8) 0.0223(4) Uani 1 1 d . . . . . 
O1 O 0.20012(7) 0.53278(19) 0.93574(6) 0.0232(3) Uani 1 1 d D . . . . 
H1 H 0.1975(15) 0.489(3) 0.9627(7) 0.035 Uiso 1 1 d D U . . . 
C11 C 0.26138(10) 0.5928(3) 0.93353(8) 0.0232(4) Uani 1 1 d . . . . . 
H11A H 0.272058 0.653165 0.963710 0.028 Uiso 1 1 calc R U . . . 
H11B H 0.261917 0.661965 0.904836 0.028 Uiso 1 1 calc R U . . . 
C12 C 0.30903(11) 0.4727(3) 0.92916(8) 0.0245(4) Uani 1 1 d . . . . . 
H12A H 0.296857 0.404966 0.901034 0.029 Uiso 1 1 calc R U . . . 
H12B H 0.348903 0.520051 0.923066 0.029 Uiso 1 1 calc R U . . . 
O2 O 0.31492(7) 0.38721(17) 0.97398(6) 0.0187(3) Uani 1 1 d . . . . . 
C13 C 0.35680(10) 0.2583(3) 0.97507(9) 0.0238(4) Uani 1 1 d . . . . . 
C14 C 0.42205(11) 0.3115(3) 0.96784(11) 0.0343(6) Uani 1 1 d . . . . . 
H14A H 0.424301 0.347329 0.933850 0.051 Uiso 1 1 calc R U . . . 
H14B H 0.450717 0.227000 0.974159 0.051 Uiso 1 1 calc R U . . . 
H14C H 0.433020 0.394488 0.990861 0.051 Uiso 1 1 calc R U . . . 
C15 C 0.35282(12) 0.1918(3) 1.02613(10) 0.0304(5) Uani 1 1 d . . . . . 
H15A H 0.367611 0.266324 1.051023 0.046 Uiso 1 1 calc R U . . . 
H15B H 0.378236 0.100190 1.029483 0.046 Uiso 1 1 calc R U . . . 
H15C H 0.310021 0.165744 1.030934 0.046 Uiso 1 1 calc R U . . . 
C16 C 0.33492(13) 0.1419(3) 0.93568(11) 0.0355(6) Uani 1 1 d . . . . . 
H16A H 0.291425 0.118980 0.938700 0.053 Uiso 1 1 calc R U . . . 
H16B H 0.359169 0.048802 0.940356 0.053 Uiso 1 1 calc R U . . . 
H16C H 0.340157 0.183622 0.902803 0.053 Uiso 1 1 calc R U . . . 
O3 O 0.25232(11) 0.4847(3) 0.75545(10) 0.0510(6) Uani 1 1 d D . . . . 
H3B H 0.246(3) 0.444(8) 0.7277(13) 0.076 Uiso 0.6777 1 d D U P A 6 
H3' H 0.234(2) 0.431(6) 0.7750(17) 0.076 Uiso 0.8537 1 d D U P B 7 
O31 O 0.2857(4) 0.1464(10) 0.6568(3) 0.0461(15) Uani 0.2657(13) 1 d D . P C 8 
H31 H 0.318706 0.097299 0.657010 0.069 Uiso 0.2657(13) 1 calc R U P C 8 
O31' O 0.2452(4) 0.2274(11) 0.6772(3) 0.0461(15) Uani 0.2657(13) 1 d D . P C 9 
H31' H 0.239512 0.266990 0.704661 0.069 Uiso 0.2657(13) 1 calc R U P C 9 
C21 C 0.2987(3) 0.3054(8) 0.6550(2) 0.0481(13) Uani 0.531(3) 1 d D . P C 3 
H21A H 0.268106 0.364359 0.672187 0.058 Uiso 0.2657(13) 1 calc R U P C 8 
H21B H 0.298356 0.341084 0.620384 0.058 Uiso 0.2657(13) 1 calc R U P C 8 
H21C H 0.284673 0.409526 0.646337 0.058 Uiso 0.2657(13) 1 calc R U P C 9 
H21D H 0.304224 0.253002 0.623369 0.058 Uiso 0.2657(13) 1 calc R U P C 9 
C22 C 0.3628(3) 0.3213(9) 0.6813(2) 0.0543(15) Uani 0.531(3) 1 d . . P C 3 
H22A H 0.388984 0.235020 0.672740 0.065 Uiso 0.531(3) 1 calc R U P C 3 
H22B H 0.382281 0.416447 0.671123 0.065 Uiso 0.531(3) 1 calc R U P C 3 
C21' C 0.2527(5) 0.4126(14) 0.7020(3) 0.0481(13) Uani 0.322(3) 1 d . . P D 4 
H21E H 0.225292 0.323158 0.698662 0.058 Uiso 0.322(3) 1 calc R U P D 4 
H21F H 0.239460 0.487627 0.676209 0.058 Uiso 0.322(3) 1 calc R U P D 4 
C22' C 0.3172(6) 0.3685(16) 0.6982(3) 0.0543(15) Uani 0.322(3) 1 d . . P D 4 
H22C H 0.321524 0.325362 0.664962 0.065 Uiso 0.322(3) 1 calc R U P D 4 
H22D H 0.343208 0.460421 0.701498 0.065 Uiso 0.322(3) 1 calc R U P D 4 
C21B C 0.2371(12) 0.398(3) 0.8006(7) 0.0481(13) Uani 0.146(3) 1 d . . P D 5 
H21G H 0.247850 0.460312 0.830426 0.058 Uiso 0.146(3) 1 calc R U P D 5 
H21H H 0.261716 0.303942 0.803288 0.058 Uiso 0.146(3) 1 calc R U P D 5 
C22B C 0.3307(12) 0.141(3) 0.7019(8) 0.0543(15) Uani 0.146(3) 1 d . . P D 5 
H22E H 0.355790 0.052463 0.713261 0.065 Uiso 0.146(3) 1 calc R U P D 5 
H22F H 0.342845 0.171605 0.668864 0.065 Uiso 0.146(3) 1 calc R U P D 5 
O4 O 0.3565(2) 0.3230(5) 0.73082(14) 0.0316(6) Uani 0.503(3) 1 d D . P C 1 
O4' O 0.3395(2) 0.2594(5) 0.73479(15) 0.0316(6) Uani 0.497(3) 1 d D . P D 2 
C23 C 0.40657(17) 0.2692(5) 0.75959(14) 0.0520(9) Uani 1 1 d D . . . . 
C24 C 0.4606(6) 0.3845(17) 0.7581(5) 0.105(3) Uani 0.503(3) 1 d . . P C 1 
H24A H 0.484221 0.362222 0.729623 0.158 Uiso 0.503(3) 1 calc R U P C 1 
H24B H 0.487492 0.375843 0.788536 0.158 Uiso 0.503(3) 1 calc R U P C 1 
H24C H 0.444145 0.487743 0.755161 0.158 Uiso 0.503(3) 1 calc R U P C 1 
C25 C 0.4287(4) 0.1153(11) 0.7580(3) 0.0642(16) Uani 0.503(3) 1 d . . P C 1 
H25A H 0.399456 0.047434 0.772634 0.096 Uiso 0.503(3) 1 calc R U P C 1 
H25B H 0.468750 0.108148 0.776739 0.096 Uiso 0.503(3) 1 calc R U P C 1 
H25C H 0.432879 0.085811 0.723644 0.096 Uiso 0.503(3) 1 calc R U P C 1 
C26 C 0.3948(5) 0.3163(17) 0.8149(3) 0.092(4) Uani 0.503(3) 1 d . . P C 1 
H26A H 0.382868 0.423414 0.815725 0.138 Uiso 0.503(3) 1 calc R U P C 1 
H26B H 0.432525 0.300930 0.836263 0.138 Uiso 0.503(3) 1 calc R U P C 1 
H26C H 0.361854 0.253574 0.826688 0.138 Uiso 0.503(3) 1 calc R U P C 1 
C24' C 0.4476(7) 0.2684(17) 0.7165(5) 0.105(3) Uani 0.497(3) 1 d . . P C 2 
H24D H 0.446940 0.368882 0.701019 0.158 Uiso 0.497(3) 1 calc R U P C 2 
H24E H 0.432481 0.192618 0.692116 0.158 Uiso 0.497(3) 1 calc R U P C 2 
H24F H 0.489796 0.243143 0.728639 0.158 Uiso 0.497(3) 1 calc R U P C 2 
C25' C 0.4067(4) 0.1104(10) 0.7841(3) 0.0642(16) Uani 0.497(3) 1 d D . P C 2 
H25D H 0.446996 0.091565 0.801496 0.096 Uiso 0.497(3) 1 calc R U P C 2 
H25E H 0.398409 0.032792 0.758663 0.096 Uiso 0.497(3) 1 calc R U P C 2 
H25F H 0.374909 0.106548 0.807704 0.096 Uiso 0.497(3) 1 calc R U P C 2 
C26' C 0.4093(5) 0.3968(17) 0.7896(3) 0.092(4) Uani 0.497(3) 1 d . . P C 2 
H26D H 0.446660 0.393124 0.811943 0.138 Uiso 0.497(3) 1 calc R U P C 2 
H26E H 0.373199 0.399401 0.808996 0.138 Uiso 0.497(3) 1 calc R U P C 2 
H26F H 0.409927 0.488141 0.769049 0.138 Uiso 0.497(3) 1 calc R U P C 2 
  
loop_ 
 _atom_site_aniso_label 
 _atom_site_aniso_U_11 
 _atom_site_aniso_U_22 
 _atom_site_aniso_U_33 
 _atom_site_aniso_U_23 
 _atom_site_aniso_U_13 
 _atom_site_aniso_U_12 
CD1 0.01486(7) 0.01739(7) 0.01572(7) -0.00112(5) -0.00018(5) 0.00205(5) 
CD2 0.01667(7) 0.01719(7) 0.01436(7) 0.00149(5) 0.00558(5) 0.00028(5) 
CD3 0.01362(9) 0.06228(18) 0.01140(9) 0.00037(10) 0.00195(7) -0.00586(10) 
N1 0.0247(9) 0.0216(9) 0.0229(9) 0.0021(7) 0.0055(7) 0.0021(7) 
N2 0.0265(9) 0.0248(9) 0.0247(9) 0.0007(7) -0.0001(7) 0.0032(8) 
N3 0.0235(9) 0.0237(9) 0.0249(9) -0.0006(7) -0.0002(7) -0.0002(7) 
N4 0.0210(9) 0.0550(14) 0.0216(9) 0.0068(9) 0.0058(7) 0.0012(9) 
N5 0.0220(9) 0.0499(13) 0.0208(9) 0.0001(9) -0.0005(7) -0.0035(9) 
C1 0.0192(9) 0.0190(9) 0.0174(9) 0.0012(7) 0.0024(7) -0.0016(7) 
C2 0.0179(9) 0.0180(9) 0.0216(9) 0.0022(7) -0.0004(7) 0.0010(7) 
C3 0.0169(8) 0.0163(8) 0.0165(8) -0.0010(7) 0.0019(7) 0.0006(7) 
C4 0.0178(9) 0.0302(11) 0.0201(9) 0.0042(8) 0.0045(7) 0.0015(8) 
C5 0.0202(9) 0.0281(11) 0.0186(9) -0.0001(8) 0.0023(7) 0.0016(8) 
O1 0.0197(7) 0.0288(8) 0.0206(7) 0.0084(6) -0.0011(6) -0.0071(6) 
C11 0.0224(10) 0.0227(10) 0.0246(10) 0.0035(8) 0.0025(8) -0.0025(8) 
C12 0.0304(11) 0.0234(10) 0.0212(10) 0.0025(8) 0.0112(8) 0.0012(8) 
O2 0.0183(7) 0.0171(7) 0.0212(7) 0.0004(5) 0.0057(5) 0.0044(5) 
C13 0.0195(9) 0.0213(10) 0.0304(11) -0.0073(9) 0.0002(8) 0.0071(8) 
C14 0.0167(10) 0.0480(16) 0.0386(14) -0.0114(12) 0.0048(9) 0.0057(10) 
C15 0.0313(12) 0.0238(11) 0.0356(13) 0.0018(9) -0.0024(10) 0.0086(9) 
C16 0.0384(14) 0.0246(12) 0.0421(14) -0.0133(11) -0.0070(11) 0.0107(10) 
O3 0.0385(11) 0.0587(15) 0.0582(15) -0.0093(12) 0.0201(11) -0.0096(11) 
O31 0.036(3) 0.068(4) 0.034(3) -0.027(3) 0.002(2) -0.007(3) 
O31' 0.036(3) 0.068(4) 0.034(3) -0.027(3) 0.002(2) -0.007(3) 
C21 0.063(3) 0.054(3) 0.024(2) -0.0024(19) -0.016(2) 0.006(2) 
C22 0.063(3) 0.078(4) 0.023(2) 0.009(2) 0.012(2) 0.025(3) 
C21' 0.063(3) 0.054(3) 0.024(2) -0.0024(19) -0.016(2) 0.006(2) 
C22' 0.063(3) 0.078(4) 0.023(2) 0.009(2) 0.012(2) 0.025(3) 
C21B 0.063(3) 0.054(3) 0.024(2) -0.0024(19) -0.016(2) 0.006(2) 
C22B 0.063(3) 0.078(4) 0.023(2) 0.009(2) 0.012(2) 0.025(3) 
O4 0.047(2) 0.0266(18) 0.0204(11) 0.0030(14) -0.0007(12) 0.0018(13) 
O4' 0.047(2) 0.0266(18) 0.0204(11) 0.0030(14) -0.0007(12) 0.0018(13) 
C23 0.0484(18) 0.066(2) 0.0434(17) 0.0101(16) 0.0158(15) 0.0167(17) 
C24 0.100(6) 0.123(8) 0.096(7) 0.007(5) 0.018(5) -0.003(6) 
C25 0.080(4) 0.067(3) 0.045(3) 0.014(3) -0.002(3) 0.020(3) 
C26 0.075(5) 0.157(10) 0.042(4) -0.041(5) -0.006(4) 0.035(6) 
C24' 0.100(6) 0.123(8) 0.096(7) 0.007(5) 0.018(5) -0.003(6) 
C25' 0.080(4) 0.067(3) 0.045(3) 0.014(3) -0.002(3) 0.020(3) 
C26' 0.075(5) 0.157(10) 0.042(4) -0.041(5) -0.006(4) 0.035(6) 
  
_geom_special_details 
; 
 All esds (except the esd in the dihedral angle between two l.s. planes) 
 are estimated using the full covariance matrix.  The cell esds are taken 
 into account individually in the estimation of esds in distances, angles 
 and torsion angles; correlations between esds in cell parameters are only 
 used when they are defined by crystal symmetry.  An approximate (isotropic) 
 treatment of cell esds is used for estimating esds involving l.s. planes. 
; 
  
loop_ 
 _geom_bond_atom_site_label_1 
 _geom_bond_atom_site_label_2 
 _geom_bond_distance 
 _geom_bond_site_symmetry_2 
 _geom_bond_publ_flag 
CD1 C5 2.192(2) . ? 
CD1 C1 2.196(2) . ? 
CD1 C2 2.219(2) . ? 
CD1 C3 2.234(2) . ? 
CD2 C4 2.188(2) . ? 
CD2 N3 2.215(2) . ? 
CD2 N2 2.215(2) . ? 
CD2 N1 2.3408(19) . ? 
CD2 O1 2.5875(17) . ? 
CD3 N4 2.290(2) 7_566 ? 
CD3 N4 2.290(2) . ? 
CD3 N5 2.309(2) . ? 
CD3 N5 2.309(2) 7_566 ? 
CD3 O3 2.343(3) . ? 
CD3 O3 2.343(3) 7_566 ? 
N1 C1 1.144(3) . ? 
N2 C2 1.153(3) 1_545 ? 
N3 C3 1.153(3) 5_577 ? 
N4 C4 1.138(3) . ? 
N5 C5 1.140(3) 6_675 ? 
C2 N2 1.153(3) 1_565 ? 
C3 N3 1.153(3) 5_577 ? 
C5 N5 1.140(3) 6_575 ? 
O1 C11 1.443(3) . ? 
O1 H1 0.831(10) . ? 
C11 C12 1.495(3) . ? 
C11 H11A 0.9900 . ? 
C11 H11B 0.9900 . ? 
C12 O2 1.429(3) . ? 
C12 H12A 0.9900 . ? 
C12 H12B 0.9900 . ? 
O2 C13 1.457(3) . ? 
C13 C15 1.514(4) . ? 
C13 C14 1.526(3) . ? 
C13 C16 1.532(3) . ? 
C14 H14A 0.9800 . ? 
C14 H14B 0.9800 . ? 
C14 H14C 0.9800 . ? 
C15 H15A 0.9800 . ? 
C15 H15B 0.9800 . ? 
C15 H15C 0.9800 . ? 
C16 H16A 0.9800 . ? 
C16 H16B 0.9800 . ? 
C16 H16C 0.9800 . ? 
O3 C21B 1.50(2) . ? 
O3 C21' 1.586(10) . ? 
O3 H3B 0.837(10) . ? 
O3 H3' 0.835(10) . ? 
O31h C21 1.431(10) . ? 
O31h H31 0.8400 . ? 
O31'i C21 1.519(10) . ? 
O31'i H31' 0.8400 . ? 
C21c C22 1.529(10) . ? 
C21c H21A 0.9900 . ? 
C21c H21B 0.9900 . ? 
C21c H21C 0.9900 . ? 
C21c H21D 0.9900 . ? 
C22c O4 1.361(7) . ? 
C22c H22A 0.9900 . ? 
C22c H22B 0.9900 . ? 
C21'd C22' 1.471(16) . ? 
C21'd H21E 0.9900 . ? 
C21'd H21F 0.9900 . ? 
C22'd O4' 1.441(11) . ? 
C22'd H22C 0.9900 . ? 
C22'd H22D 0.9900 . ? 
C21Be C22B 1.52(4) 7_556 ? 
C21Be H21G 0.9900 . ? 
C21Be H21H 0.9900 . ? 
C22Be O4' 1.38(3) . ? 
C22Be C21B 1.52(4) 7_556 ? 
C22Be H22E 0.9900 . ? 
C22Be H22F 0.9900 . ? 
O4a C23 1.379(5) . ? 
O4'b C23 1.568(6) . ? 
C23 C26' 1.388(12) . ? 
C23 C25 1.441(10) . ? 
C23 C24' 1.526(13) . ? 
C23 C25' 1.550(9) . ? 
C23 C24 1.560(14) . ? 
C23 C26 1.598(9) . ? 
C24a H24A 0.9800 . ? 
C24a H24B 0.9800 . ? 
C24a H24C 0.9800 . ? 
C25a H25A 0.9800 . ? 
C25a H25B 0.9800 . ? 
C25a H25C 0.9800 . ? 
C26a H26A 0.9800 . ? 
C26a H26B 0.9800 . ? 
C26a H26C 0.9800 . ? 
C24'b H24D 0.9800 . ? 
C24'b H24E 0.9800 . ? 
C24'b H24F 0.9800 . ? 
C25'b H25D 0.9800 . ? 
C25'b H25E 0.9800 . ? 
C25'b H25F 0.9800 . ? 
C26'b H26D 0.9800 . ? 
C26'b H26E 0.9800 . ? 
C26'b H26F 0.9800 . ? 
  
loop_ 
 _geom_angle_atom_site_label_1 
 _geom_angle_atom_site_label_2 
 _geom_angle_atom_site_label_3 
 _geom_angle 
 _geom_angle_site_symmetry_1 
 _geom_angle_site_symmetry_3 
 _geom_angle_publ_flag 
C5 CD1 C1 116.97(8) . . ? 
C5 CD1 C2 111.16(8) . . ? 
C1 CD1 C2 107.10(8) . . ? 
C5 CD1 C3 108.93(8) . . ? 
C1 CD1 C3 109.86(7) . . ? 
C2 CD1 C3 101.73(8) . . ? 
C4 CD2 N3 139.92(8) . . ? 
C4 CD2 N2 113.43(8) . . ? 
N3 CD2 N2 105.12(7) . . ? 
C4 CD2 N1 96.07(8) . . ? 
N3 CD2 N1 88.04(7) . . ? 
N2 CD2 N1 99.21(7) . . ? 
C4 CD2 O1 81.76(7) . . ? 
N3 CD2 O1 85.81(6) . . ? 
N2 CD2 O1 92.99(6) . . ? 
N1 CD2 O1 167.42(6) . . ? 
N4 CD3 N4 180.00(8) 7_566 . ? 
N4 CD3 N5 92.34(8) 7_566 . ? 
N4 CD3 N5 87.66(8) . . ? 
N4 CD3 N5 87.66(8) 7_566 7_566 ? 
N4 CD3 N5 92.34(8) . 7_566 ? 
N5 CD3 N5 180.0 . 7_566 ? 
N4 CD3 O3 89.93(9) 7_566 . ? 
N4 CD3 O3 90.07(9) . . ? 
N5 CD3 O3 89.45(9) . . ? 
N5 CD3 O3 90.55(9) 7_566 . ? 
N4 CD3 O3 90.07(9) 7_566 7_566 ? 
N4 CD3 O3 89.93(9) . 7_566 ? 
N5 CD3 O3 90.55(9) . 7_566 ? 
N5 CD3 O3 89.45(9) 7_566 7_566 ? 
O3 CD3 O3 180.0 . 7_566 ? 
C1 N1 CD2 166.98(18) . . ? 
C2 N2 CD2 174.98(19) 1_545 . ? 
C3 N3 CD2 164.67(18) 5_577 . ? 
C4 N4 CD3 168.5(2) . . ? 
C5 N5 CD3 177.7(2) 6_675 . ? 
N1 C1 CD1 177.9(2) . . ? 
N2 C2 CD1 175.11(19) 1_565 . ? 
N3 C3 CD1 173.84(18) 5_577 . ? 
N4 C4 CD2 174.0(2) . . ? 
N5 C5 CD1 179.3(2) 6_575 . ? 
C11 O1 CD2 120.48(13) . . ? 
C11 O1 H1 109(2) . . ? 
CD2 O1 H1 113(2) . . ? 
O1 C11 C12 113.31(19) . . ? 
O1 C11 H11A 108.9 . . ? 
C12 C11 H11A 108.9 . . ? 
O1 C11 H11B 108.9 . . ? 
C12 C11 H11B 108.9 . . ? 
H11A C11 H11B 107.7 . . ? 
O2 C12 C11 108.94(17) . . ? 
O2 C12 H12A 109.9 . . ? 
C11 C12 H12A 109.9 . . ? 
O2 C12 H12B 109.9 . . ? 
C11 C12 H12B 109.9 . . ? 
H12A C12 H12B 108.3 . . ? 
C12 O2 C13 116.42(16) . . ? 
O2 C13 C15 103.99(18) . . ? 
O2 C13 C14 110.3(2) . . ? 
C15 C13 C14 110.8(2) . . ? 
O2 C13 C16 110.21(18) . . ? 
C15 C13 C16 110.1(2) . . ? 
C14 C13 C16 111.2(2) . . ? 
C13 C14 H14A 109.5 . . ? 
C13 C14 H14B 109.5 . . ? 
H14A C14 H14B 109.5 . . ? 
C13 C14 H14C 109.5 . . ? 
H14A C14 H14C 109.5 . . ? 
H14B C14 H14C 109.5 . . ? 
C13 C15 H15A 109.5 . . ? 
C13 C15 H15B 109.5 . . ? 
H15A C15 H15B 109.5 . . ? 
C13 C15 H15C 109.5 . . ? 
H15A C15 H15C 109.5 . . ? 
H15B C15 H15C 109.5 . . ? 
C13 C16 H16A 109.5 . . ? 
C13 C16 H16B 109.5 . . ? 
H16A C16 H16B 109.5 . . ? 
C13 C16 H16C 109.5 . . ? 
H16A C16 H16C 109.5 . . ? 
H16B C16 H16C 109.5 . . ? 
C21Be O3 CD3 123.6(10) . . ? 
C21'd O3 CD3 110.1(4) . . ? 
C21Be O3 H3B 119(5) . . ? 
CD3 O3 H3B 112(5) . . ? 
C21'd O3 H3' 113(4) . . ? 
CD3 O3 H3' 127(4) . . ? 
H3Bf O3 H3' 106(6) . . ? 
C21c O31h H31 109.5 . . ? 
C21c O31'i H31' 109.5 . . ? 
O31h C21c C22 104.5(6) . . ? 
O31'i C21c C22 124.0(6) . . ? 
O31h C21c H21A 110.9 . . ? 
C22c C21c H21A 110.9 . . ? 
O31h C21c H21B 110.9 . . ? 
C22c C21c H21B 110.9 . . ? 
H21Ah C21c H21B 108.9 . . ? 
O31'i C21c H21C 106.3 . . ? 
C22c C21c H21C 106.3 . . ? 
O31'i C21c H21D 106.3 . . ? 
C22c C21c H21D 106.3 . . ? 
H21Ci C21c H21D 106.4 . . ? 
O4a C22c C21 107.9(5) . . ? 
O4a C22c H22A 110.1 . . ? 
C21c C22c H22A 110.1 . . ? 
O4a C22c H22B 110.1 . . ? 
C21c C22c H22B 110.1 . . ? 
H22Ac C22c H22B 108.4 . . ? 
C22'd C21'd O3 103.9(7) . . ? 
C22'd C21'd H21E 111.0 . . ? 
O3 C21'd H21E 111.0 . . ? 
C22'd C21'd H21F 111.0 . . ? 
O3 C21'd H21F 111.0 . . ? 
H21Ed C21'd H21F 109.0 . . ? 
O4'b C22'd C21' 113.8(9) . . ? 
O4'b C22'd H22C 108.8 . . ? 
C21'd C22'd H22C 108.8 . . ? 
O4'b C22'd H22D 108.8 . . ? 
C21'd C22'd H22D 108.8 . . ? 
H22Cd C22'd H22D 107.7 . . ? 
O3 C21Be C22B 110.8(15) . 7_556 ? 
O3 C21Be H21G 109.5 . . ? 
C22Be C21Be H21G 109.5 7_556 . ? 
O3 C21Be H21H 109.5 . . ? 
C22Be C21Be H21H 109.5 7_556 . ? 
H21Ge C21Be H21H 108.1 . . ? 
O4'b C22Be C21B 106.8(17) . 7_556 ? 
O4'b C22Be H22E 110.4 . . ? 
C21Be C22Be H22E 110.4 7_556 . ? 
O4'b C22Be H22F 110.4 . . ? 
C21Be C22Be H22F 110.4 7_556 . ? 
H22Ee C22Be H22F 108.6 . . ? 
C22c O4a C23 114.9(4) . . ? 
C22Be O4'b C23 113.6(11) . . ? 
C22'd O4'b C23 121.0(7) . . ? 
O4a C23 C25 124.1(5) . . ? 
C26'b C23 C24' 116.9(9) . . ? 
C26'b C23 C25' 118.8(7) . . ? 
C24'b C23 C25' 110.0(7) . . ? 
O4a C23 C24 109.3(6) . . ? 
C25a C23 C24 110.9(7) . . ? 
C26'b C23 O4' 107.1(5) . . ? 
C24'b C23 O4' 104.7(6) . . ? 
C25'b C23 O4' 96.1(5) . . ? 
O4a C23 C26 105.5(5) . . ? 
C25a C23 C26 110.5(6) . . ? 
C24a C23 C26 91.7(7) . . ? 
C23 C24a H24A 109.5 . . ? 
C23 C24a H24B 109.5 . . ? 
H24Aa C24a H24B 109.5 . . ? 
C23 C24a H24C 109.5 . . ? 
H24Aa C24a H24C 109.5 . . ? 
H24Ba C24a H24C 109.5 . . ? 
C23 C25a H25A 109.5 . . ? 
C23 C25a H25B 109.5 . . ? 
H25Aa C25a H25B 109.5 . . ? 
C23 C25a H25C 109.5 . . ? 
H25Aa C25a H25C 109.5 . . ? 
H25Ba C25a H25C 109.5 . . ? 
C23 C26a H26A 109.5 . . ? 
C23 C26a H26B 109.5 . . ? 
H26Aa C26a H26B 109.5 . . ? 
C23 C26a H26C 109.5 . . ? 
H26Aa C26a H26C 109.5 . . ? 
H26Ba C26a H26C 109.5 . . ? 
C23 C24'b H24D 109.5 . . ? 
C23 C24'b H24E 109.5 . . ? 
H24Db C24'b H24E 109.5 . . ? 
C23 C24'b H24F 109.5 . . ? 
H24Db C24'b H24F 109.5 . . ? 
H24Eb C24'b H24F 109.5 . . ? 
C23 C25'b H25D 109.5 . . ? 
C23 C25'b H25E 109.5 . . ? 
H25Db C25'b H25E 109.5 . . ? 
C23 C25'b H25F 109.5 . . ? 
H25Db C25'b H25F 109.5 . . ? 
H25Eb C25'b H25F 109.5 . . ? 
C23 C26'b H26D 109.5 . . ? 
C23 C26'b H26E 109.5 . . ? 
H26Db C26'b H26E 109.5 . . ? 
C23 C26'b H26F 109.5 . . ? 
H26Db C26'b H26F 109.5 . . ? 
H26Eb C26'b H26F 109.5 . . ? 
  
loop_ 
 _geom_torsion_atom_site_label_1 
 _geom_torsion_atom_site_label_2 
 _geom_torsion_atom_site_label_3 
 _geom_torsion_atom_site_label_4 
 _geom_torsion 
 _geom_torsion_site_symmetry_1 
 _geom_torsion_site_symmetry_2 
 _geom_torsion_site_symmetry_3 
 _geom_torsion_site_symmetry_4 
 _geom_torsion_publ_flag 
O1 C11 C12 O2 -67.5(2) . . . . ? 
O3 C21'd C22'd O4'b 60.6(12) . . . . ? 
  
loop_ 
 _geom_hbond_atom_site_label_D 
 _geom_hbond_atom_site_label_H 
 _geom_hbond_atom_site_label_A 
 _geom_hbond_distance_DH 
 _geom_hbond_distance_HA 
 _geom_hbond_distance_DA 
 _geom_hbond_angle_DHA 
 _geom_hbond_site_symmetry_A 
O1 H1 O2_$1  0.831(10) 1.978(10) 2.808(2) 176(3) 2_557 
C12 H12A O31h_$2  0.99 2.34 3.178(8) 141.4 7_556 
C12 H12A O31'i_$2  0.99 2.54 3.514(8) 169.6 7_556 
O3 H3Bf O31'i  0.837(10) 2.35(4) 3.104(8) 150(7) . 
O31'i H31'i O3  0.84 2.37 3.104(8) 146.5 . 
C21c H21Ah O3  0.99 2.54 3.373(7) 141.2 . 
C21Be H21He O4'b  0.99 2.64 3.21(3) 116.6 . 
  
_refine_diff_density_max    1.347 
_refine_diff_density_min   -1.357 
_refine_diff_density_rms    0.101 
  
_shelx_res_file 
; 
  
TITL test_i2_a in I2/a 
 test_i2_a.res created by SHELXL-2016/4 at 19:20:39 on 30-Jan-2018 
CELL 0.71073  21.82610   8.81550  27.15149  90.0000  94.2899  90.0000 
ZERR    4.00   0.00070   0.00030   0.00122   0.0000   0.0004   0.0000 
LATT 2 
SYMM 0.5-X, Y, -Z 
SFAC C  H  N  O  Cd 
UNIT 136  232.5  40  36.25  20 
L.S. 4 
BOND 
acta 
dfix 0.84 0.01 O1 H1 O3 H3' O3 H3B 
eadp O31 O31' 
eadp O4 O4' 
eadp C21 C21' C21B 
eadp C22 C22' C22B 
eadp C24 C24' 
eadp C25 C25' 
eadp C26 C26' 
sadi 0.01 C23 O4 C23 O4' 
sadi 0.01 C21 O31 C21 O31' 
dang 2.7 0.02 O4' C25' 
sump 1 0 1 3 1 4 1 5 
htab 
eqiv $1 -x+1/2, y, -z+2 
eqiv $2 -x+1/2, -y+1/2, -z+3/2 
htab O1 O2_$1 
htab C12 O31_$2 
htab C12 O31'_$2 
htab O3 O31' 
htab O31' O3 
htab C21 O3 
htab C21B O4' 
bind 1 3 
bind 3 6 
bind 3 7 
bind 3 8 
bind 3 9 
bind 2 4 
bind 2 5 
bind 4 7 
bind 5 6 
bind 6 7 
bind 2 6 
bind 2 7 
bind 1 6 
bind 1 7 
bind 6 8 
bind 6 9 
bind 7 8 
bind 7 9 
FMAP 2 
conf O1 C11 C12 O2 
conf O31 C21 C22 O4 
conf O3 C21' C22' O4' 
conf O3 C21B C22B_$2 O4'_$2 
PLAN 20 
bond $h 
SIZE 0.200 0.240 0.270 
TEMP -183 
WGHT    0.028600   18.124701 
FVAR       0.03322   0.50259   0.53134   0.32231   0.14635 
MOLE 1 
CD1   5   -0.053850    1.202940    0.896601    11.00000    0.01486    0.01739 = 
         0.01572   -0.00112   -0.00018    0.00205 
CD2   5    0.105203    0.698296    0.909922    11.00000    0.01667    0.01719 = 
         0.01436    0.00149    0.00558    0.00028 
CD3   5    0.250000    0.750000    0.750000    10.50000    0.01362    0.06228 = 
         0.01140    0.00037    0.00195   -0.00586 
N1    3    0.032867    0.891411    0.893770    11.00000    0.02473    0.02162 = 
         0.02287    0.00206    0.00552    0.00213 
N2    3    0.044005    0.498873    0.898681    11.00000    0.02647    0.02482 = 
         0.02468    0.00073   -0.00011    0.00316 
N3    3    0.104238    0.754044    0.989401    11.00000    0.02345    0.02371 = 
         0.02489   -0.00060   -0.00016   -0.00022 
N4    3    0.184820    0.759407    0.812218    11.00000    0.02095    0.05498 = 
         0.02158    0.00676    0.00584    0.00121 
N5    3    0.330510    0.762255    0.810067    11.00000    0.02196    0.04992 = 
         0.02085    0.00013   -0.00050   -0.00352 
C1    1    0.002189    0.996604    0.894214    11.00000    0.01923    0.01905 = 
         0.01744    0.00120    0.00243   -0.00156 
C2    1    0.009835    1.399006    0.895650    11.00000    0.01794    0.01802 = 
         0.02157    0.00224   -0.00036    0.00099 
C3    1   -0.090191    1.226447    0.970996    11.00000    0.01685    0.01626 = 
         0.01647   -0.00100    0.00188    0.00062 
C4    1    0.158846    0.746180    0.846777    11.00000    0.01777    0.03019 = 
         0.02014    0.00417    0.00450    0.00150 
C5    1   -0.130107    1.226601    0.839858    11.00000    0.02020    0.02812 = 
         0.01857   -0.00012    0.00227    0.00160 
O1    4    0.200120    0.532779    0.935744    11.00000    0.01972    0.02880 = 
         0.02061    0.00840   -0.00110   -0.00713 
H1    2    0.197536    0.489197    0.962668    11.00000   -1.50000 
C11   1    0.261377    0.592823    0.933532    11.00000    0.02243    0.02275 = 
         0.02463    0.00352    0.00249   -0.00255 
AFIX  23 
H11A  2    0.272058    0.653165    0.963710    11.00000   -1.20000 
H11B  2    0.261917    0.661965    0.904836    11.00000   -1.20000 
AFIX   0 
C12   1    0.309034    0.472729    0.929156    11.00000    0.03036    0.02341 = 
         0.02125    0.00246    0.01120    0.00117 
AFIX  23 
H12A  2    0.296857    0.404966    0.901034    11.00000   -1.20000 
H12B  2    0.348903    0.520051    0.923066    11.00000   -1.20000 
AFIX   0 
O2    4    0.314921    0.387209    0.973982    11.00000    0.01830    0.01712 = 
         0.02121    0.00043    0.00570    0.00440 
C13   1    0.356804    0.258292    0.975073    11.00000    0.01947    0.02125 = 
         0.03038   -0.00726    0.00018    0.00707 
C14   1    0.422046    0.311540    0.967839    11.00000    0.01668    0.04804 = 
         0.03865   -0.01138    0.00478    0.00570 
AFIX 137 
H14A  2    0.424301    0.347329    0.933850    11.00000   -1.50000 
H14B  2    0.450717    0.227000    0.974159    11.00000   -1.50000 
H14C  2    0.433020    0.394488    0.990861    11.00000   -1.50000 
AFIX   0 
C15   1    0.352817    0.191775    1.026128    11.00000    0.03127    0.02378 = 
         0.03557    0.00182   -0.00239    0.00856 
AFIX 137 
H15A  2    0.367611    0.266324    1.051023    11.00000   -1.50000 
H15B  2    0.378236    0.100190    1.029483    11.00000   -1.50000 
H15C  2    0.310021    0.165744    1.030934    11.00000   -1.50000 
AFIX   0 
C16   1    0.334917    0.141941    0.935684    11.00000    0.03841    0.02462 = 
         0.04209   -0.01328   -0.00703    0.01070 
AFIX 137 
H16A  2    0.291425    0.118980    0.938700    11.00000   -1.50000 
H16B  2    0.359169    0.048802    0.940356    11.00000   -1.50000 
H16C  2    0.340157    0.183622    0.902803    11.00000   -1.50000 
AFIX   0 
O3    4    0.252319    0.484737    0.755454    11.00000    0.03854    0.05865 = 
         0.05821   -0.00935    0.02013   -0.00959 
part 6 
H3B   2    0.246418    0.444101    0.727658    10.67769   -1.50000 
part 7 
H3'   2    0.234268    0.430585    0.775025    10.85365   -1.50000 
part 8 
O31   4    0.285704    0.146407    0.656771    30.50000    0.03620    0.06813 = 
         0.03391   -0.02706    0.00157   -0.00695 
AFIX 147 
H31   2    0.318706    0.097299    0.657010    30.50000   -1.50000 
AFIX   0 
part 9 
O31'  4    0.245180    0.227410    0.677229    30.50000    0.03620    0.06813 = 
         0.03391   -0.02706    0.00157   -0.00695 
AFIX 147 
H31'  2    0.239512    0.266990    0.704661    30.50000   -1.50000 
AFIX   0 
part 3 
C21   1    0.298667    0.305404    0.654975    31.00000    0.06323    0.05381 = 
         0.02428   -0.00237   -0.01609    0.00583 
part 8 
AFIX  23 
H21A  2    0.268106    0.364359    0.672187    30.50000   -1.20000 
H21B  2    0.298356    0.341084    0.620384    30.50000   -1.20000 
AFIX  23 
part 9 
H21C  2    0.284673    0.409526    0.646337    30.50000   -1.20000 
H21D  2    0.304224    0.253002    0.623369    30.50000   -1.20000 
AFIX   0 
part 3 
C22   1    0.362763    0.321267    0.681338    31.00000    0.06332    0.07762 = 
         0.02311    0.00895    0.01150    0.02509 
AFIX  23 
H22A  2    0.388984    0.235020    0.672740    31.00000   -1.20000 
H22B  2    0.382281    0.416447    0.671123    31.00000   -1.20000 
AFIX   0 
part 4 
C21'  1    0.252714    0.412611    0.701974    41.00000    0.06323    0.05381 = 
         0.02428   -0.00237   -0.01609    0.00583 
AFIX  23 
H21E  2    0.225292    0.323158    0.698662    41.00000   -1.20000 
H21F  2    0.239460    0.487627    0.676209    41.00000   -1.20000 
AFIX   0 
C22'  1    0.317190    0.368461    0.698192    41.00000    0.06332    0.07762 = 
         0.02311    0.00895    0.01150    0.02509 
AFIX  23 
H22C  2    0.321524    0.325362    0.664962    41.00000   -1.20000 
H22D  2    0.343208    0.460421    0.701498    41.00000   -1.20000 
AFIX   0 
part 5 
C21B  1    0.237091    0.398294    0.800630    51.00000    0.06323    0.05381 = 
         0.02428   -0.00237   -0.01609    0.00583 
AFIX  23 
H21G  2    0.247850    0.460312    0.830426    51.00000   -1.20000 
H21H  2    0.261716    0.303942    0.803288    51.00000   -1.20000 
AFIX   0 
C22B  1    0.330723    0.141072    0.701851    51.00000    0.06332    0.07762 = 
         0.02311    0.00895    0.01150    0.02509 
AFIX  23 
H22E  2    0.355790    0.052463    0.713261    51.00000   -1.20000 
H22F  2    0.342845    0.171605    0.668864    51.00000   -1.20000 
AFIX   0 
part 1 
O4    4    0.356504    0.323023    0.730824    21.00000    0.04734    0.02663 = 
         0.02042    0.00300   -0.00065    0.00185 
part 2 
O4'   4    0.339451    0.259423    0.734790   -21.00000    0.04734    0.02663 = 
         0.02042    0.00300   -0.00065    0.00185 
part 0 
C23   1    0.406570    0.269211    0.759591    11.00000    0.04836    0.06609 = 
         0.04340    0.01012    0.01584    0.01670 
part 1 
C24   1    0.460632    0.384468    0.758088    21.00000    0.09976    0.12258 = 
         0.09569    0.00736    0.01758   -0.00272 
AFIX 137 
H24A  2    0.484221    0.362222    0.729623    21.00000   -1.50000 
H24B  2    0.487492    0.375843    0.788536    21.00000   -1.50000 
H24C  2    0.444145    0.487743    0.755161    21.00000   -1.50000 
AFIX   0 
C25   1    0.428684    0.115335    0.758027    21.00000    0.08026    0.06673 = 
         0.04470    0.01379   -0.00159    0.02046 
AFIX 137 
H25A  2    0.399456    0.047434    0.772634    21.00000   -1.50000 
H25B  2    0.468750    0.108148    0.776739    21.00000   -1.50000 
H25C  2    0.432879    0.085811    0.723644    21.00000   -1.50000 
AFIX   0 
C26   1    0.394819    0.316337    0.814914    21.00000    0.07511    0.15690 = 
         0.04242   -0.04100   -0.00611    0.03496 
AFIX 137 
H26A  2    0.382868    0.423414    0.815725    21.00000   -1.50000 
H26B  2    0.432525    0.300930    0.836263    21.00000   -1.50000 
H26C  2    0.361854    0.253574    0.826688    21.00000   -1.50000 
AFIX   0 
part 2 
C24'  1    0.447620    0.268390    0.716484   -21.00000    0.09976    0.12258 = 
         0.09569    0.00736    0.01758   -0.00272 
AFIX 137 
H24D  2    0.446940    0.368882    0.701019   -21.00000   -1.50000 
H24E  2    0.432481    0.192618    0.692116   -21.00000   -1.50000 
H24F  2    0.489796    0.243143    0.728639   -21.00000   -1.50000 
AFIX   0 
C25'  1    0.406737    0.110432    0.784118   -21.00000    0.08026    0.06673 = 
         0.04470    0.01379   -0.00159    0.02046 
AFIX 137 
H25D  2    0.446996    0.091565    0.801496   -21.00000   -1.50000 
H25E  2    0.398409    0.032792    0.758663   -21.00000   -1.50000 
H25F  2    0.374909    0.106548    0.807704   -21.00000   -1.50000 
AFIX   0 
C26'  1    0.409289    0.396846    0.789600   -21.00000    0.07511    0.15690 = 
         0.04242   -0.04100   -0.00611    0.03496 
AFIX 137 
H26D  2    0.446660    0.393124    0.811943   -21.00000   -1.50000 
H26E  2    0.373199    0.399401    0.808996   -21.00000   -1.50000 
H26F  2    0.409927    0.488141    0.769049   -21.00000   -1.50000 
part 0 
AFIX   0 
HKLF 4 
  
  
  
  
REM  test_i2_a in I2/a 
REM R1 =  0.0256 for    7297 Fo > 4sig(Fo)  and  0.0284 for all    7912 data 
REM    319 parameters refined using      7 restraints 
  
END 
  
WGHT      0.0286     18.1068 
  
REM Instructions for potential hydrogen bonds 
HTAB O1 O2_$1 
HTAB C12 O31_$2 
HTAB C12 O31'_$2 
HTAB O3 O31' 
HTAB O3 O31_$2 
HTAB O3 O31'_$2 
HTAB O3 O4'_$2 
HTAB O31' O3 
HTAB C21 O3 
HTAB C21' O4'_$2 
EQIV $3 -x+1/2, -y+3/2, -z+3/ 
HTAB C22' N4_$3 
HTAB C21B O4' 
  
REM Highest difference peak  1.347,  deepest hole -1.357,  1-sigma level  0.101 
Q1    1   0.2822  0.1792  0.6514  11.00000  0.05    1.23 
Q2    1   0.3507  0.2395  0.6805  11.00000  0.05    1.22 
Q3    1   0.2379  0.4664  0.9057  11.00000  0.05    0.97 
Q4    1   0.4757  0.2986  0.7342  11.00000  0.05    0.91 
Q5    1   0.4154  0.3740  0.8014  11.00000  0.05    0.89 
Q6    1   0.3776  0.2491  0.8147  11.00000  0.05    0.83 
Q7    1   0.0802  0.7327  0.9000  11.00000  0.05    0.71 
Q8    1   0.0268  1.3947  0.8980  11.00000  0.05    0.62 
Q9    1   0.2987  0.3784  0.7018  11.00000  0.05    0.60 
Q10   1   0.4002  0.4195  0.7803  11.00000  0.05    0.58 
Q11   1   0.3155  0.2595  0.7417  11.00000  0.05    0.54 
Q12   1   0.2873  0.4499  0.7496  11.00000  0.05    0.54 
Q13   1   0.0056  1.3686  0.8864  11.00000  0.05    0.50 
Q14   1   0.0040  1.3638  0.9024  11.00000  0.05    0.50 
Q15   1   0.2410  0.4410  0.7135  11.00000  0.05    0.45 
Q16   1   0.3471  0.2000  0.7480  11.00000  0.05    0.43 
Q17   1   0.2877  0.5360  0.9320  11.00000  0.05    0.42 
Q18   1   0.2581  0.3751  0.6893  11.00000  0.05    0.41 
Q19   1   0.2490  0.4621  0.7672  11.00000  0.05    0.41 
Q20   1   0.2328  0.5436  0.7483  11.00000  0.05    0.40 
; 
_shelx_res_checksum   51819 
  
_shelx_hkl_file 
; 
   0   0   4   17.12    0.25 
   0   0   4   18.12    0.24 
   0   0   6  700.48    9.12 
   0   0   6  715.97   10.73 
   0   0   8   42.89    0.61 
   0   0   8   44.15    0.58 
   0   0  10  161.50    2.14 
   0   0  10  161.32    2.15 
   0   0  12  243.54    3.22 
   0   0  12  242.26    3.39 
   0   0  14  332.83    4.32 
   0   0  14  329.11    4.62 
   0   0  16   72.32    1.04 
   0   0  16   72.55    0.97 
   0   0  18   30.53    0.54 
   0   0  18   30.26    0.46 
   0   0  20  136.92    1.76 
   0   0  20  133.54    1.86 
   0   0  22    3.23    0.17 
   0   0  22    3.30    0.11 
   0   0  24   15.49    0.38 
   0   0  24   16.11    0.30 
   0   0  26   45.86    0.80 
   0   0  28    5.77    0.24 
   0   0  30    1.45    0.15 
   0   0  32   25.46    0.58 
   0   0  34    5.82    0.28 
   0   0  36    0.94    0.15 
   0  -1   1   30.69    0.42 
   0   1   1   29.93    0.40 
   0   1  -1   30.91    0.40 
   0  -1   3   13.76    0.20 
   0  -1  -3   13.51    0.18 
   0   1   3   13.27    0.20 
   0   1   3   13.46    0.20 
   0   1   5    4.25    0.09 
   0   1   5    4.28    0.09 
   0   1   5    4.19    0.06 
   0  -1   7   20.44    0.33 
   0  -1   7   21.57    0.28 
   0   1   7   21.49    0.32 
   0   1   7   21.64    0.33 
   0  -1   9   11.17    0.16 
   0   1   9   11.33    0.20 
   0   1   9   11.12    0.21 
   0  -1  11    1.79    0.05 
   0  -1  11    1.79    0.09 
   0   1  11    1.72    0.08 
   0   1  11    1.77    0.07 
   0  -1  13   18.38    0.27 
   0  -1  13   17.90    0.34 
   0   1  13   18.48    0.30 
   0   1  13   18.43    0.33 
   0  -1  15    1.85    0.10 
   0  -1  15    1.64    0.06 
   0   1  15    1.74    0.08 
   0  -1  17    5.53    0.12 
   0  -1  17    5.52    0.18 
   0   1  17    5.69    0.15 
   0  -1  19   10.83    0.19 
   0  -1  19   10.75    0.28 
   0   1  19   11.26    0.28 
   0   1  19   10.86    0.23 
   0  -1  21    0.07    0.03 
   0  -1  21    0.11    0.06 
   0   1  21   -0.03    0.05 
   0   1  21    0.07    0.04 
   0  -1  23    3.67    0.18 
   0   1  23    3.24    0.17 
   0   1  23    3.65    0.13 
   0  -1  25    0.66    0.10 
   0   1  25    0.54    0.07 
   0   1  25    0.55    0.10 
   0  -1  27    4.24    0.21 
   0   1  27    3.94    0.15 
   0   1  27    4.02    0.19 
   0  -1  29    2.14    0.17 
   0   1  29    2.21    0.17 
   0  -1  31    0.64    0.12 
   0   1  31    0.75    0.12 
   0  -1  33    5.68    0.27 
   0   1  33    6.05    0.27 
   0  -1  35    0.77    0.14 
   0   1  35    0.75    0.13 
   0  -1  37    1.55    0.18 
   0   1  37    1.89    0.18 
   0   2   0  787.89   12.75 
   0  -2   2    2.06    0.06 
   0   2  -2    1.87    0.05 
   0  -2  -4    6.76    0.11 
   0   2   4    6.56    0.13 
   0   2  -4    6.97    0.10 
   0  -2   6   49.60    0.67 
   0  -2  -6   49.64    0.63 
   0   2   6   47.82    0.66 
   0   2   6   49.51    0.67 
   0   2   8   44.13    0.62 
   0   2   8   43.96    0.62 
   0  -2  10   65.78    0.91 
   0   2  10   66.30    0.91 
   0   2  10   66.12    0.90 
   0  -2  12  110.41    1.48 
   0   2  12  110.31    1.47 
   0   2  12  111.15    1.46 
   0  -2  14  149.52    2.01 
   0   2  14  153.09    2.00 
   0   2 -14  149.44    1.92 
   0   2  14  155.61    1.98 
   0  -2  16   51.84    0.79 
   0   2  16   52.07    0.75 
   0   2 -16   50.99    0.67 
   0   2  16   51.60    0.78 
   0  -2  18   37.30    0.62 
   0   2  18   36.43    0.57 
   0   2  18   35.34    0.60 
   0  -2  20   64.34    0.99 
   0   2  20   66.11    0.93 
   0   2  20   63.45    0.98 
   0  -2  22    3.11    0.16 
   0   2  22    2.92    0.13 
   0   2  22    3.26    0.16 
   0  -2  24    0.06    0.07 
   0   2  24    0.04    0.04 
   0   2  24    0.05    0.06 
   0  -2  26   19.43    0.46 
   0   2  26   19.04    0.38 
   0   2  26   18.87    0.44 
   0  -2  28    0.02    0.07 
   0   2  28    0.00    0.04 
   0   2  28    0.02    0.06 
   0  -2  30    2.56    0.18 
   0   2  30    2.51    0.17 
   0   2  30    2.38    0.16 
   0  -2  32   15.65    0.45 
   0   2  32   16.04    0.44 
   0  -2  34    1.76    0.19 
   0   2  34    2.01    0.19 
   0  -2  36    2.05    0.21 
   0   2  36    2.27    0.20 
   0   3   1    6.82    0.14 
   0   3  -1    6.55    0.13 
   0  -3   3    6.38    0.13 
   0   3   3    6.08    0.13 
   0   3  -3    6.17    0.11 
   0  -3  -5    0.16    0.02 
   0  -3   5    0.12    0.03 
   0   3   5    0.06    0.02 
   0   3  -5    0.11    0.02 
   0  -3  -7    0.46    0.03 
   0  -3   7    0.50    0.05 
   0   3  -7    0.49    0.02 
   0   3   7    0.49    0.05 
   0   3   7    0.43    0.04 
   0  -3   9    8.28    0.18 
   0  -3  -9    7.91    0.13 
   0   3   9    7.81    0.18 
   0   3   9    7.92    0.17 
   0  -3  11    8.98    0.20 
   0   3  11    9.15    0.20 
   0   3  11    9.21    0.20 
   0  -3  13   17.84    0.34 
   0   3  13   17.76    0.33 
   0   3  13   17.02    0.32 
   0  -3  15    1.15    0.09 
   0   3  15    1.20    0.08 
   0   3  15    1.28    0.09 
   0  -3  17   51.15    0.79 
   0   3  17   49.20    0.75 
   0   3  17   48.66    0.76 
   0  -3  19   28.07    0.53 
   0   3  19   29.22    0.49 
   0   3  19   28.55    0.52 
   0  -3  21    2.96    0.16 
   0   3  21    3.18    0.14 
   0   3  21    2.78    0.15 
   0  -3  23   62.07    0.99 
   0   3  23   60.60    0.92 
   0   3  23   59.39    0.96 
   0  -3  25   11.26    0.33 
   0   3  25   11.41    0.28 
   0   3  25   11.44    0.32 
   0  -3  27   18.27    0.45 
   0   3  27   17.01    0.38 
   0   3  27   17.66    0.43 
   0  -3  29   34.92    0.70 
   0   3  29   33.74    0.67 
   0   3  29   34.25    0.61 
   0  -3  31    0.42    0.10 
   0   3  31    0.30    0.07 
   0   3  31    0.34    0.10 
   0  -3  33   23.79    0.59 
   0   3  33   24.25    0.57 
   0  -3  35   13.42    0.43 
   0   3  35   13.27    0.42 
   0   3  37    3.69    0.24 
   0   4   0  226.75    3.11 
   0  -4   2    9.80    0.19 
   0   4  -2    9.89    0.18 
   0   4   2   10.38    0.20 
   0  -4  -4    0.69    0.05 
   0  -4   4    0.71    0.05 
   0   4   4    0.78    0.06 
   0   4  -4    0.71    0.04 
   0  -4  -6   50.41    0.68 
   0  -4   6   50.23    0.71 
   0   4  -6   50.94    0.66 
   0   4   6   49.20    0.72 
   0  -4   8   24.97    0.42 
   0  -4  -8   26.58    0.38 
   0   4   8   26.16    0.43 
   0   4  -8   25.95    0.35 
   0  -4 -10    0.04    0.02 
   0  -4  10    0.05    0.04 
   0   4  10    0.00    0.03 
   0  -4  12   56.80    0.85 
   0   4  12   58.97    0.85 
   0   4  12   59.14    0.84 
   0  -4  14   42.93    0.68 
   0   4  14   42.83    0.67 
   0   4  14   42.00    0.65 
   0  -4  16    0.38    0.07 
   0   4  16    0.39    0.06 
   0   4  16    0.37    0.06 
   0  -4  18   10.09    0.27 
   0   4  18   10.10    0.26 
   0   4  18   10.04    0.25 
   0  -4  20   23.71    0.48 
   0   4  20   24.61    0.47 
   0   4  20   24.07    0.46 
   0  -4  22    1.76    0.14 
   0   4  22    1.50    0.11 
   0   4  22    1.57    0.12 
   0  -4  24    0.21    0.08 
   0   4  24    0.12    0.06 
   0   4  24    0.25    0.07 
   0  -4  26    6.11    0.25 
   0   4  26    5.96    0.21 
   0   4  26    5.93    0.23 
   0  -4  28    3.94    0.22 
   0   4  28    3.41    0.18 
   0   4  28    3.65    0.20 
   0  -4  30    1.94    0.18 
   0   4  30    1.77    0.14 
   0   4  30    1.73    0.16 
   0  -4  32    5.60    0.28 
   0   4  32    6.02    0.26 
   0   4  32    5.80    0.23 
   0  -4  34    5.55    0.28 
   0   4  34    5.38    0.26 
   0   4  36    0.80    0.13 
   0   5   1    0.94    0.06 
   0   5  -1    0.88    0.06 
   0  -5  -3    2.96    0.11 
   0  -5   3    2.63    0.10 
   0   5   3    2.57    0.10 
   0   5  -3    2.57    0.09 
   0  -5   5    2.50    0.10 
   0  -5  -5    2.46    0.09 
   0   5   5    2.62    0.11 
   0   5  -5    2.49    0.08 
   0  -5   7   29.57    0.47 
   0  -5  -7   28.89    0.44 
   0   5   7   28.75    0.48 
   0   5  -7   29.15    0.41 
   0  -5  -9   15.60    0.26 
   0  -5   9   15.34    0.30 
   0   5   9   15.26    0.31 
   0  -5 -11    4.90    0.12 
   0  -5  11    4.96    0.16 
   0   5  11    5.15    0.16 
   0  -5  13   50.97    0.77 
   0  -5 -13   50.13    0.67 
   0   5  13   48.70    0.77 
   0  -5  15    9.94    0.26 
   0   5  15    9.79    0.25 
   0  -5  17   25.65    0.49 
   0   5  17   26.50    0.48 
   0   5  17   25.70    0.48 
   0  -5  19   34.91    0.62 
   0   5  19   34.48    0.60 
   0   5  19   34.29    0.60 
   0  -5  21    4.53    0.20 
   0   5  21    4.52    0.18 
   0   5  21    4.51    0.18 
   0  -5  23   60.72    1.01 
   0   5  23   63.21    0.98 
   0   5  23   61.96    0.98 
   0  -5  25   13.84    0.38 
   0   5  25   13.54    0.36 
   0   5  25   14.02    0.35 
   0  -5  27   21.26    0.51 
   0   5  27   20.96    0.46 
   0   5  27   20.91    0.48 
   0  -5  29   34.91    0.72 
   0   5  29   34.77    0.66 
   0   5  29   34.11    0.68 
   0  -5  31    0.07    0.09 
   0   5  31    0.07    0.07 
   0   5  31    0.09    0.08 
   0  -5  33   30.12    0.69 
   0   5  33   31.02    0.67 
   0   5  33   30.47    0.62 
   0   5  35   11.37    0.35 
   0   5  35   11.63    0.39 
   0   6   0    0.30    0.05 
   0  -6  -2   15.00    0.30 
   0  -6   2   14.51    0.28 
   0   6  -2   14.78    0.27 
   0   6   2   15.30    0.29 
   0  -6   4   39.64    0.60 
   0  -6  -4   39.45    0.60 
   0   6   4   38.82    0.61 
   0   6  -4   38.83    0.57 
   0  -6  -6   13.65    0.26 
   0  -6   6   12.53    0.26 
   0   6   6   12.32    0.27 
   0   6  -6   12.85    0.23 
   0  -6  -8    4.10    0.13 
   0  -6   8    4.08    0.14 
   0   6  -8    3.96    0.10 
   0   6   8    4.14    0.15 
   0  -6  10   21.05    0.39 
   0  -6 -10   21.31    0.35 
   0   6  10   21.16    0.41 
   0  -6  12    0.03    0.04 
   0   6  12   -0.02    0.04 
   0  -6  14    0.30    0.07 
   0   6  14    0.32    0.07 
   0  -6  16   16.96    0.38 
   0   6  16   17.94    0.39 
   0  -6  18    1.86    0.13 
   0   6  18    1.74    0.12 
   0  -6  20    0.02    0.06 
   0   6  20   -0.02    0.05 
   0  -6  22   12.13    0.34 
   0   6  22   11.81    0.32 
   0  -6  24    1.66    0.16 
   0   6  24    1.55    0.13 
   0  -6  26    0.10    0.08 
   0   6  26   -0.01    0.06 
   0   6  26   -0.05    0.05 
   0  -6  28    1.93    0.18 
   0  -6  28    2.31    0.17 
   0   6  28    2.14    0.16 
   0   6  28    2.10    0.16 
   0  -6  30    3.74    0.23 
   0  -6  30    3.51    0.21 
   0   6  30    3.81    0.21 
   0   6  30    3.67    0.21 
   0  -6  32    0.46    0.12 
   0   6  32    0.42    0.10 
   0   6  32    0.62    0.12 
   0   6  34    2.01    0.18 
   0  -7   1    0.61    0.08 
   0  -7   1    0.89    0.07 
   0  -7  -1    0.79    0.08 
   0   7   1    0.99    0.08 
   0   7  -1    0.81    0.07 
   0  -7  -3    2.26    0.12 
   0  -7   3    2.40    0.11 
   0   7   3    2.33    0.12 
   0  -7  -5    0.22    0.05 
   0  -7   5    0.08    0.04 
   0   7   5    0.10    0.05 
   0   7  -5    0.03    0.03 
   0  -7   7    7.91    0.21 
   0  -7  -7    7.95    0.20 
   0   7   7    7.66    0.22 
   0  -7   9    7.89    0.22 
   0  -7  -9    7.90    0.20 
   0   7   9    7.94    0.23 
   0  -7  11    1.02    0.09 
   0   7  11    1.02    0.10 
   0  -7  13   18.91    0.39 
   0   7  13   18.84    0.41 
   0  -7  15    6.54    0.22 
   0   7  15    6.26    0.22 
   0  -7  17    8.16    0.26 
   0   7  17    8.67    0.27 
   0  -7  19   16.85    0.41 
   0   7  19   17.74    0.41 
   0  -7  21    0.52    0.10 
   0   7  21    0.64    0.09 
   0  -7  23   25.05    0.55 
   0   7  23   25.16    0.54 
   0  -7  25    5.45    0.25 
   0   7  25    5.40    0.24 
   0  -7  27    8.14    0.31 
   0  -7  27    8.14    0.32 
   0   7  27    8.10    0.29 
   0  -7  29   18.21    0.49 
   0  -7  29   17.68    0.49 
   0   7  29   18.10    0.46 
   0  -7  31    0.27    0.12 
   0  -7  31    0.19    0.09 
   0   7  31    0.24    0.09 
   0  -8   0   12.05    0.27 
   0  -8   0   11.74    0.30 
   0   8   0   11.84    0.27 
   0  -8  -2   14.72    0.34 
   0  -8   2   14.70    0.31 
   0  -8   2   14.40    0.35 
   0   8  -2   15.11    0.31 
   0   8   2   14.62    0.32 
   0  -8   4   48.91    0.76 
   0  -8  -4   48.53    0.77 
   0  -8   4   48.52    0.81 
   0   8   4   48.64    0.77 
   0   8  -4   49.14    0.73 
   0  -8  -6   29.78    0.52 
   0  -8   6   28.97    0.51 
   0   8   6   29.66    0.54 
   0  -8   8    0.83    0.09 
   0  -8  -8    0.64    0.07 
   0   8   8    0.75    0.09 
   0  -8  10   43.03    0.71 
   0   8  10   42.67    0.73 
   0  -8  12    4.09    0.18 
   0   8  12    4.28    0.18 
   0  -8  14    1.38    0.13 
   0   8  14    1.43    0.12 
   0  -8  16   36.91    0.67 
   0   8  16   36.31    0.68 
   0  -8  18   -0.03    0.06 
   0   8  18    0.01    0.06 
   0  -8  20    3.35    0.19 
   0   8  20    2.84    0.18 
   0  -8  22   18.71    0.49 
   0  -8  22   19.88    0.48 
   0   8  22   19.47    0.47 
   0  -8  24    0.55    0.12 
   0  -8  24    0.46    0.10 
   0   8  24    0.46    0.10 
   0  -8  26    2.00    0.19 
   0  -8  26    2.38    0.19 
   0   8  26    2.05    0.17 
   0  -8  28    3.70    0.23 
   0  -8  28    3.22    0.23 
   0   8  28    3.87    0.22 
   0  -8  30    1.81    0.22 
   0  -8  30    2.09    0.29 
   0  -9   1    0.54    0.07 
   0  -9  -1    0.60    0.07 
   0  -9   1    0.49    0.08 
   0  -9  -1    0.47    0.08 
   0   9   1    0.53    0.08 
   0   9  -1    0.43    0.07 
   0  -9  -3    1.14    0.11 
   0  -9   3    1.34    0.10 
   0  -9   3    1.22    0.12 
   0   9   3    1.25    0.10 
   0  -9   5    1.10    0.09 
   0  -9   5    0.80    0.10 
   0  -9  -5    1.05    0.10 
   0   9   5    1.22    0.11 
   0  -9   7    0.46    0.07 
   0  -9   7    0.28    0.08 
   0   9   7    0.40    0.08 
   0  -9   9    1.57    0.15 
   0  -9   9    1.46    0.12 
   0   9   9    1.55    0.13 
   0  -9  11    0.15    0.06 
   0  -9  11   -0.08    0.06 
   0   9  11    0.02    0.06 
   0  -9  13    2.96    0.20 
   0  -9  13    3.04    0.17 
   0   9  13    3.09    0.18 
   0  -9  15    1.46    0.13 
   0  -9  15    1.41    0.15 
   0   9  15    1.61    0.15 
   0  -9  17    1.17    0.14 
   0  -9  17    1.18    0.13 
   0   9  17    1.23    0.13 
   0  -9  19    6.18    0.28 
   0  -9  19    6.09    0.25 
   0   9  19    5.60    0.25 
   0  -9  21    0.16    0.09 
   0  -9  21    0.14    0.09 
   0   9  21    0.20    0.09 
   0  -9  23    2.33    0.20 
   0  -9  23    2.69    0.21 
   0   9  23    2.71    0.19 
   0  -9  25    1.01    0.15 
   0  -9  25    0.94    0.14 
   0   9  25    0.45    0.10 
   0  -9  27    1.06    0.16 
   0 -10   0   55.04    0.93 
   0 -10   2   12.63    0.36 
   0 -10  -2   13.06    0.34 
   0  10   2   12.09    0.31 
   0 -10  -4   46.62    0.80 
   0 -10   4   46.69    0.84 
   0  10   4   47.24    0.79 
   0 -10   6   43.51    0.81 
   0  10   6   44.28    0.77 
   0 -10   8    1.17    0.14 
   0  10   8    1.28    0.13 
   0 -10  10   56.31    1.00 
   0  10  10   56.58    0.95 
   0 -10  12    5.61    0.27 
   0  10  12    5.50    0.24 
   0 -10  14   15.50    0.45 
   0  10  14   15.25    0.41 
   0 -10  16   37.42    0.78 
   0  10  16   36.47    0.72 
   0 -10  18    0.35    0.11 
   0  10  18    0.10    0.08 
   0 -10  20   10.22    0.38 
   0  10  20   10.82    0.36 
   0 -10  22    5.69    0.43 
   0 -11  -1    1.40    0.14 
   0 -11   1    1.57    0.15 
   0 -11   3   -0.15    0.07 
   0 -11   5    0.80    0.13 
   0  11   5    0.98    0.12 
   0 -11   7    0.74    0.13 
   0  11   7    0.73    0.10 
   0 -11   9   -0.08    0.07 
   0  11   9   -0.05    0.06 
   0 -11  11    1.20    0.16 
   0  11  11    1.16    0.14 
   0 -11  13    0.16    0.10 
   0  11  13    0.32    0.10 
   0 -11  15   -0.03    0.08 
   0  11  15    0.06    0.07 
   0  11  17    1.16    0.15 
   0 -12   2    3.65    0.23 
   0 -12   4   12.15    0.40 
   0 -12   6   12.40    0.41 
   0 -12   8    0.09    0.09 
   0  12   8    0.15    0.08 
   0 -12  10   12.24    0.47 
   0  12  10   13.11    0.39 
   0  12  12    1.61    0.16 
   1   0  37    0.10    0.10 
   1   0  35    0.05    0.08 
   1   0  33    0.26    0.09 
   1   0  31    0.08    0.08 
   1   0  29    0.00    0.07 
   1   0  27   -0.05    0.07 
   1   0  25   -0.03    0.03 
   1   0  25    0.06    0.07 
   1   0  23    0.04    0.03 
   1   0  23    0.02    0.06 
   1   0  21    0.06    0.05 
   1   0  21   -0.02    0.03 
   1   0  19    0.02    0.03 
   1   0  19    0.14    0.06 
   1   0  17    0.06    0.03 
   1   0  17    0.01    0.04 
   1   0  15    0.12    0.03 
   1   0  15    0.16    0.05 
   1   0  13    0.01    0.02 
   1   0  13    0.01    0.04 
   1   0  11    0.05    0.02 
   1   0  11    0.00    0.03 
   1   0   9    0.19    0.04 
   1   0   7    0.21    0.03 
   1   0   5   -0.19    0.01 
   1   0   5   -0.19    0.02 
   1   0   3    0.01    0.01 
   1   0   3   -0.01    0.01 
   1   0   3   -0.02    0.01 
   1   0   1   -0.27    0.00 
   1   0   1   -0.26    0.00 
  -1   0  -1   -0.26    0.00 
  -1   0   1   -0.08    0.00 
  -1   0   1   -0.09    0.00 
  -1   0   5   -0.93    0.02 
  -1   0   7   -0.02    0.03 
  -1   0   9    0.10    0.04 
  -1   0  11   -0.02    0.02 
  -1   0  11    0.01    0.04 
  -1   0  13    0.04    0.02 
  -1   0  13   -0.03    0.03 
  -1   0  15   -0.06    0.02 
  -1   0  15   -0.08    0.04 
  -1   0  17    0.07    0.04 
  -1   0  17    0.03    0.02 
  -1   0  19    0.05    0.03 
  -1   0  19    0.15    0.05 
  -1   0  21    0.30    0.07 
  -1   0  23    0.00    0.03 
  -1   0  23    0.06    0.06 
  -1   0  25    0.13    0.07 
  -1   0  25    0.10    0.04 
  -1   0  27    0.06    0.06 
  -1   0  29   -0.02    0.07 
  -1   0  31    0.01    0.07 
  -1   0  33    0.12    0.09 
  -1   0  35    0.06    0.09 
  -1   0  37    0.17    0.09 
   1  -1  36   11.43    0.40 
   1   1  36   11.91    0.40 
   1  -1  34   14.00    0.43 
   1   1  34   14.40    0.43 
   1  -1  32   80.31    1.33 
   1   1  32   82.34    1.32 
   1  -1  30    5.26    0.24 
   1   1  30    5.20    0.24 
   1  -1  28    1.66    0.15 
   1   1  28    1.93    0.15 
   1  -1  26  124.34    1.81 
   1   1  26  125.17    1.80 
   1   1  26  125.44    1.69 
   1  -1  24    0.17    0.07 
   1   1  24    0.21    0.08 
   1   1  24    0.19    0.05 
   1  -1  22   31.56    0.59 
   1   1  22   32.04    0.59 
   1   1  22   32.43    0.52 
   1  -1  20  206.23    2.76 
   1   1  20  204.61    2.75 
   1   1  20  211.30    2.68 
   1   1  18   41.43    0.68 
   1   1  18   42.66    0.62 
   1  -1  16   74.12    1.06 
   1   1  16   74.15    1.01 
   1   1  16   72.81    1.06 
   1  -1  14   94.71    1.22 
   1  -1  14   96.29    1.32 
   1   1  14   94.62    1.31 
   1   1  14   96.42    1.26 
   1  -1  12  195.95    2.57 
   1   1  12  199.60    2.73 
   1   1  12  201.37    2.74 
   1  -1  10  100.44    1.35 
   1   1  10  103.55    1.33 
   1  -1   8    6.67    0.15 
   1   1   8    6.93    0.10 
   1   1   8    7.01    0.14 
  -1   1  -8    6.89    0.11 
   1  -1   6  292.20    3.92 
  -1   1  -6  298.41    3.69 
   1   1   6  286.58    3.85 
   1   1   6  293.89    3.96 
   1  -1   4  110.03    1.51 
   1   1   4  102.38    1.42 
  -1   1  -4  107.29    1.37 
   1   1   4  107.51    1.49 
   1  -1   2    0.06    0.01 
  -1   1  -2    0.08    0.01 
   1   1   2    0.04    0.01 
   1  -1   0  122.36    1.63 
  -1   1   0  115.70    1.58 
   1   1   0  120.62    1.60 
  -1  -1   2   11.48    0.15 
   1  -1  -2   11.01    0.16 
  -1  -1   2   11.08    0.17 
  -1   1   2   11.06    0.15 
  -1   1   2   10.81    0.16 
  -1  -1   4   12.37    0.19 
  -1  -1   4   12.41    0.16 
  -1   1   4   12.30    0.19 
   1   1  -4   13.15    0.17 
  -1  -1   6   38.90    0.50 
  -1  -1   6   39.24    0.54 
  -1   1   6   39.47    0.53 
  -1   1   6   39.19    0.53 
  -1  -1   8   21.39    0.28 
  -1  -1   8   20.87    0.33 
  -1   1   8   21.06    0.33 
  -1   1   8   21.17    0.32 
  -1  -1  10    1.00    0.04 
  -1   1  10    1.05    0.05 
  -1  -1  12   36.01    0.47 
  -1  -1  12   34.95    0.54 
  -1   1  12   34.63    0.54 
  -1   1  12   35.26    0.51 
  -1  -1  14    3.93    0.14 
  -1  -1  14    4.10    0.09 
  -1   1  14    3.84    0.11 
  -1  -1  16   75.39    0.98 
  -1  -1  16   73.14    1.07 
  -1   1  16   74.71    1.02 
  -1   1  16   75.47    1.07 
  -1  -1  18    7.74    0.15 
  -1  -1  18    7.79    0.22 
  -1   1  18    7.58    0.22 
  -1   1  18    7.64    0.18 
  -1  -1  20    2.33    0.08 
  -1   1  20    2.23    0.10 
  -1   1  20    2.33    0.13 
  -1  -1  22   19.70    0.43 
  -1  -1  22   20.67    0.33 
  -1   1  22   20.10    0.36 
  -1   1  22   20.20    0.42 
  -1  -1  24   35.38    0.66 
  -1   1  24   36.91    0.58 
  -1   1  24   35.85    0.65 
  -1  -1  26   10.74    0.32 
  -1   1  26   10.42    0.25 
  -1   1  26   10.78    0.31 
  -1  -1  28    8.20    0.29 
  -1   1  28    8.34    0.28 
  -1  -1  30   47.64    0.87 
  -1   1  30   48.51    0.87 
  -1  -1  32    2.24    0.18 
  -1   1  32    2.05    0.17 
  -1  -1  34    0.08    0.08 
  -1   1  34    0.21    0.10 
  -1  -1  36   46.70    0.92 
  -1   1  36   46.61    0.91 
   1  -2  37    1.55    0.27 
   1   2  37    2.35    0.20 
   1  -2  35    0.24    0.11 
   1   2  35    0.37    0.12 
   1  -2  33    2.78    0.21 
   1   2  33    2.34    0.19 
   1  -2  31    0.80    0.13 
   1   2  31    0.80    0.11 
   1  -2  29    0.08    0.08 
   1   2  29   -0.01    0.06 
   1   2  29    0.08    0.05 
   1  -2  27    0.56    0.10 
   1   2  27    0.83    0.11 
   1   2  27    0.76    0.08 
   1  -2  25    0.17    0.07 
   1   2  25    0.10    0.06 
   1   2  25    0.26    0.05 
   1  -2  23    0.13    0.06 
   1   2  23    0.09    0.06 
   1   2  23    0.02    0.04 
   1  -2  21    2.96    0.16 
   1   2  21    3.00    0.12 
   1   2  21    2.96    0.15 
   1  -2  19    8.57    0.24 
   1   2  19    8.30    0.24 
   1   2  19    8.30    0.20 
   1  -2  17    4.20    0.16 
   1   2  17    3.86    0.15 
  -1   2 -17    4.06    0.08 
   1   2  17    4.03    0.13 
   1  -2  15    1.74    0.11 
   1   2  15    1.95    0.10 
   1   2  15    1.81    0.09 
  -1   2 -15    1.77    0.05 
   1  -2  13   13.50    0.28 
   1   2  13   13.71    0.27 
   1   2  13   13.78    0.26 
  -1   2 -13   13.70    0.19 
   1  -2  11    4.09    0.13 
   1   2  11    4.02    0.11 
   1   2  11    3.86    0.12 
   1  -2   9    6.21    0.15 
   1   2   9    5.97    0.14 
   1   2   9    6.20    0.14 
  -1  -2  -7    2.19    0.04 
   1  -2   7    2.54    0.08 
   1   2   7    2.22    0.08 
   1   2   7    2.41    0.08 
   1  -2   5   35.63    0.49 
   1   2   5   35.32    0.49 
   1   2   5   34.65    0.50 
  -1   2  -5   36.27    0.45 
   1  -2   3   61.89    0.85 
   1   2   3   64.28    0.83 
  -1   2  -3   63.56    0.85 
   1  -2   1   17.74    0.25 
  -1   2  -1   17.94    0.25 
   1   2   1   18.24    0.26 
   1  -2  -1   88.25    1.21 
   1   2  -1   89.81    1.20 
  -1   2   1   83.60    1.14 
   1  -2  -3   68.80    0.94 
  -1  -2   3   69.58    0.95 
  -1   2   3   69.58    0.91 
   1   2  -3   70.67    0.93 
  -1  -2   5    0.11    0.01 
  -1  -2   5    0.13    0.03 
   1  -2  -5    0.09    0.02 
  -1   2   5    0.22    0.03 
  -1   2   5    0.06    0.02 
  -1  -2   7   93.17    1.29 
   1  -2  -7   92.19    1.24 
  -1   2   7   95.00    1.28 
  -1   2   7   92.81    1.31 
  -1  -2   9   30.79    0.47 
  -1   2   9   31.08    0.46 
  -1   2   9   31.85    0.46 
  -1  -2  11   21.03    0.36 
  -1   2  11   20.82    0.35 
  -1   2  11   21.03    0.34 
  -1  -2  13  126.71    1.61 
  -1  -2  13  126.52    1.70 
  -1   2  13  126.60    1.69 
  -1   2  13  129.90    1.67 
  -1  -2  15   18.26    0.35 
  -1  -2  15   17.97    0.25 
  -1   2  15   18.50    0.35 
  -1   2  15   18.64    0.33 
  -1  -2  17   19.58    0.38 
  -1   2  17   19.07    0.34 
  -1   2  17   18.56    0.37 
  -1  -2  19   26.25    0.50 
  -1   2  19   26.99    0.49 
  -1   2  19   27.66    0.46 
  -1  -2  21    0.76    0.10 
  -1   2  21    0.54    0.08 
  -1   2  21    0.80    0.08 
  -1  -2  23   23.26    0.49 
  -1   2  23   23.74    0.43 
  -1   2  23   24.05    0.48 
  -1  -2  25    1.96    0.15 
  -1   2  25    1.75    0.13 
  -1   2  25    1.93    0.11 
  -1  -2  27    8.37    0.29 
  -1   2  27    8.76    0.28 
  -1   2  27    8.23    0.23 
  -1  -2  29   14.63    0.41 
  -1   2  29   14.15    0.39 
  -1   2  29   15.11    0.34 
  -1  -2  31    0.02    0.08 
  -1   2  31    0.20    0.08 
  -1  -2  33    6.00    0.28 
  -1   2  33    5.47    0.26 
  -1  -2  35    2.94    0.22 
  -1   2  35    2.71    0.21 
  -1  -2  37    2.30    0.21 
  -1   2  37    2.34    0.19 
   1  -3  36    2.22    0.21 
   1   3  36    2.20    0.19 
   1  -3  34    8.05    0.33 
   1   3  34    7.90    0.32 
   1  -3  32   31.99    0.69 
   1   3  32   32.50    0.67 
   1   3  32   31.31    0.78 
   1  -3  30    0.36    0.11 
   1   3  30    0.40    0.10 
   1   3  30    0.29    0.07 
   1  -3  28    1.10    0.13 
   1   3  28    1.20    0.13 
   1   3  28    0.94    0.10 
   1  -3  26   53.53    0.92 
   1   3  26   53.96    0.91 
   1   3  26   53.61    0.85 
   1  -3  24    0.10    0.08 
   1   3  24    0.09    0.05 
   1   3  24    0.26    0.07 
   1  -3  22    3.10    0.17 
   1   3  22    3.00    0.16 
   1   3  22    2.84    0.14 
   1  -3  20   89.85    1.31 
   1   3  20   88.74    1.29 
   1   3  20   88.81    1.26 
   1  -3  18   37.59    0.64 
   1   3  18   38.09    0.60 
   1   3  18   36.94    0.62 
   1  -3  16   29.85    0.52 
   1   3  16   28.94    0.49 
   1   3  16   29.67    0.51 
   1  -3  14   58.51    0.86 
   1   3  14   58.03    0.84 
   1   3  14   58.26    0.85 
   1   3  12   67.47    0.95 
   1   3  12   68.65    0.96 
   1  -3  10   32.97    0.50 
   1   3  10   31.72    0.50 
   1   3  10   32.39    0.50 
   1  -3   8    3.16    0.10 
  -1  -3  -8    3.33    0.07 
  -1   3  -8    3.17    0.05 
   1   3   8    3.09    0.10 
   1   3   8    3.24    0.10 
  -1  -3  -6   39.30    0.52 
   1  -3   6   38.76    0.55 
  -1   3  -6   38.98    0.51 
   1   3   6   38.53    0.56 
   1  -3   4    0.24    0.03 
  -1   3  -4    0.18    0.02 
   1   3   4    0.18    0.03 
   1  -3   2    1.01    0.05 
  -1   3  -2    1.18    0.05 
  -1   3   0  211.93    2.86 
   1   3   0  212.58    2.82 
   1  -3  -2   56.03    0.76 
  -1   3   2   57.26    0.77 
   1   3  -2   57.02    0.75 
   1  -3  -4    2.87    0.08 
  -1  -3   4    2.87    0.08 
   1   3  -4    2.87    0.07 
  -1   3   4    3.02    0.09 
   1  -3  -6   16.46    0.25 
  -1  -3   6   16.11    0.22 
  -1  -3   6   16.36    0.28 
  -1   3   6   16.24    0.28 
  -1  -3   8   27.51    0.43 
   1  -3  -8   28.12    0.38 
  -1   3   8   27.25    0.41 
  -1   3   8   27.21    0.43 
  -1  -3  10    3.05    0.11 
  -1   3  10    2.86    0.10 
  -1   3  10    2.87    0.10 
  -1  -3  12   15.52    0.30 
  -1   3  12   15.37    0.28 
  -1   3  12   14.75    0.29 
  -1  -3  14   10.96    0.25 
  -1   3  14   11.23    0.24 
  -1   3  14   11.43    0.24 
  -1  -3  16   22.71    0.43 
  -1   3  16   23.81    0.41 
  -1   3  16   23.28    0.42 
  -1  -3  18   15.47    0.34 
  -1   3  18   15.36    0.33 
  -1   3  18   15.30    0.31 
  -1  -3  20    1.56    0.12 
  -1   3  20    1.40    0.10 
  -1   3  20    1.40    0.11 
  -1  -3  22   15.47    0.37 
  -1   3  22   15.72    0.36 
  -1   3  22   15.19    0.33 
  -1  -3  24   20.69    0.46 
  -1   3  24   19.67    0.40 
  -1   3  24   20.27    0.44 
  -1  -3  26    4.27    0.21 
  -1   3  26    4.50    0.20 
  -1   3  26    4.57    0.18 
  -1  -3  28    5.72    0.26 
  -1   3  28    5.83    0.21 
  -1   3  28    6.29    0.25 
  -1  -3  30   22.48    0.54 
  -1   3  30   23.17    0.47 
  -1   3  30   22.42    0.52 
  -1  -3  32    0.26    0.09 
  -1   3  32    0.06    0.06 
  -1   3  32    0.02    0.07 
  -1  -3  34    0.71    0.14 
  -1   3  34    0.74    0.12 
  -1  -3  36   24.85    0.62 
  -1   3  36   23.83    0.59 
   1  -4  35    2.56    0.23 
   1   4  35    2.92    0.21 
   1  -4  33    1.60    0.17 
   1   4  33    2.01    0.16 
   1   4  33    2.04    0.18 
   1  -4  31    0.29    0.10 
   1   4  31    0.05    0.07 
   1   4  31    0.24    0.08 
   1  -4  29    0.66    0.12 
   1   4  29    0.58    0.09 
   1   4  29    0.59    0.10 
   1  -4  27    0.18    0.08 
   1   4  27    0.08    0.07 
   1   4  27    0.03    0.06 
   1  -4  25    0.45    0.09 
   1   4  25    0.77    0.09 
   1   4  25    0.44    0.08 
   1  -4  23    0.97    0.12 
   1   4  23    0.70    0.09 
   1   4  23    0.74    0.09 
   1  -4  21    0.45    0.08 
   1   4  21    0.38    0.07 
   1   4  21    0.35    0.06 
   1  -4  19    7.69    0.24 
   1   4  19    8.03    0.23 
   1   4  19    7.89    0.22 
   1  -4  17   10.43    0.27 
   1   4  17    9.78    0.25 
   1   4  17    9.89    0.25 
   1  -4  15   14.16    0.31 
   1   4  15   14.54    0.31 
   1   4  15   14.47    0.30 
   1  -4  13   63.67    0.91 
   1   4  13   62.24    0.91 
   1   4  13   61.09    0.90 
   1  -4  11    9.87    0.22 
  -1  -4 -11    9.66    0.15 
   1   4  11    9.28    0.22 
  -1  -4  -9   71.70    0.93 
   1  -4   9   71.58    0.99 
  -1   4  -9   71.40    0.91 
   1   4   9   72.63    1.01 
  -1  -4  -7   85.95    1.10 
   1  -4   7   83.36    1.14 
   1   4   7   84.40    1.15 
  -1   4  -7   85.31    1.08 
   1  -4   5   17.02    0.29 
  -1   4  -5   17.50    0.26 
   1   4   5   17.73    0.31 
   1  -4   3  185.57    2.60 
   1   4   3  183.96    2.56 
  -1   4  -3  186.17    4.09 
   1  -4   1   73.80    0.98 
  -1   4  -1   74.13    0.98 
   1   4   1   73.88    0.99 
   1  -4  -1  160.18    2.11 
  -1   4   1  157.86    2.26 
   1   4  -1  158.03    2.21 
  -1  -4   3  221.90    3.03 
   1  -4  -3  216.99    2.92 
  -1   4   3  206.90    2.75 
   1   4  -3  217.80    2.85 
  -1  -4   5    0.26    0.04 
   1  -4  -5    0.23    0.03 
   1   4  -5    0.22    0.03 
  -1   4   5    0.24    0.04 
   1  -4  -7  197.72    2.67 
  -1  -4   7  197.92    2.56 
  -1   4   7  201.88    2.74 
   1  -4  -9   35.65    0.49 
  -1  -4   9   35.38    0.45 
  -1  -4   9   34.55    0.54 
  -1  -4  11   73.08    1.04 
   1  -4 -11   74.80    0.97 
  -1   4  11   74.12    1.02 
  -1   4  11   75.22    1.05 
  -1  -4  13  228.00    3.03 
  -1   4  13  218.27    2.90 
  -1   4  13  226.64    2.99 
  -1  -4  15    0.49    0.07 
  -1   4  15    0.41    0.06 
  -1   4  15    0.65    0.07 
  -1  -4  17  128.45    1.78 
  -1   4  17  129.48    1.76 
  -1   4  17  131.40    1.76 
  -1  -4  19   74.51    1.13 
  -1   4  19   75.43    1.10 
  -1   4  19   75.87    1.11 
  -1  -4  21    9.29    0.28 
  -1   4  21    8.76    0.25 
  -1   4  21    9.00    0.25 
  -1  -4  23   71.55    1.12 
  -1   4  23   70.99    1.09 
  -1   4  23   70.31    1.07 
  -1  -4  25    4.11    0.21 
  -1   4  25    4.39    0.18 
  -1   4  25    4.07    0.19 
  -1  -4  27   24.31    0.55 
  -1   4  27   25.21    0.50 
  -1   4  27   24.94    0.53 
  -1  -4  29   29.00    0.63 
  -1   4  29   27.52    0.55 
  -1   4  29   28.92    0.60 
  -1  -4  31    0.10    0.09 
  -1   4  31    0.12    0.07 
  -1   4  31    0.15    0.08 
  -1  -4  33   12.48    0.41 
  -1   4  33   11.56    0.33 
  -1   4  33   11.51    0.37 
  -1  -4  35    3.26    0.24 
  -1   4  35    3.69    0.22 
  -1   4  37    2.95    0.25 
   1  -5  34    2.45    0.22 
   1   5  34    2.56    0.18 
   1   5  34    2.84    0.21 
   1  -5  32    5.04    0.27 
   1   5  32    5.28    0.24 
   1   5  32    4.61    0.24 
   1  -5  30    2.10    0.17 
   1  -5  30    2.04    0.19 
   1   5  30    2.28    0.17 
   1   5  30    2.26    0.16 
   1  -5  28    0.55    0.11 
   1  -5  28    0.46    0.09 
   1   5  28    0.65    0.10 
   1   5  28    0.59    0.11 
   1  -5  26    1.78    0.16 
   1   5  26    1.92    0.15 
   1   5  26    2.11    0.15 
   1  -5  24    0.36    0.10 
   1   5  24    0.34    0.07 
   1   5  24    0.31    0.08 
   1  -5  22    7.83    0.27 
   1   5  22    7.40    0.24 
   1   5  22    7.77    0.25 
   1  -5  20    5.05    0.21 
   1   5  20    5.22    0.19 
   1   5  20    4.98    0.19 
   1  -5  18    9.77    0.27 
   1   5  18    9.71    0.26 
   1   5  18    9.03    0.25 
   1  -5  16    3.31    0.15 
   1   5  16    3.32    0.15 
   1  -5  14    3.74    0.15 
   1   5  14    3.40    0.14 
   1  -5  12    9.79    0.24 
  -1  -5 -12    9.84    0.17 
   1   5  12    9.52    0.24 
   1  -5  10    6.56    0.18 
  -1  -5 -10    6.77    0.14 
  -1   5 -10    6.66    0.11 
   1   5  10    6.97    0.19 
   1  -5   8    0.28    0.05 
  -1  -5  -8    0.22    0.04 
  -1   5  -8    0.27    0.03 
   1   5   8    0.29    0.05 
   1  -5   6    1.00    0.06 
  -1  -5  -6    1.02    0.06 
   1   5   6    0.98    0.07 
  -1   5  -6    0.98    0.05 
   1  -5   4    7.77    0.17 
  -1   5  -4    7.64    0.16 
   1   5   4    7.85    0.19 
   1  -5   2    1.08    0.06 
  -1   5  -2    1.10    0.06 
   1   5   2    1.08    0.07 
   1  -5   0   39.20    0.60 
   1   5   0   39.25    0.57 
  -1   5   0   38.84    0.57 
   1  -5  -2   11.50    0.23 
   1   5  -2   10.92    0.21 
  -1   5   2   10.73    0.22 
  -1  -5   4    2.77    0.10 
   1  -5  -4    3.11    0.11 
   1   5  -4    2.82    0.09 
  -1  -5   6    0.05    0.03 
   1  -5  -6    0.01    0.03 
   1   5  -6    0.05    0.02 
  -1  -5   8    3.57    0.08 
   1  -5  -8    3.57    0.11 
  -1  -5   8    3.63    0.13 
  -1   5   8    3.56    0.13 
  -1  -5  10    7.08    0.12 
   1  -5 -10    7.28    0.16 
  -1  -5  10    6.85    0.19 
  -1   5  10    6.86    0.19 
   1  -5 -12    2.32    0.08 
  -1  -5  12    2.36    0.12 
  -1   5  12    2.24    0.12 
  -1  -5  14    3.37    0.14 
  -1   5  14    2.92    0.13 
  -1  -5  16   14.55    0.33 
  -1   5  16   14.56    0.32 
  -1   5  16   15.16    0.31 
  -1  -5  18    0.74    0.09 
  -1   5  18    0.60    0.07 
  -1   5  18    0.61    0.08 
  -1  -5  20    5.88    0.22 
  -1   5  20    6.18    0.21 
  -1   5  20    5.75    0.20 
  -1  -5  22    5.98    0.24 
  -1   5  22    6.47    0.22 
  -1   5  22    6.37    0.22 
  -1  -5  24    0.57    0.10 
  -1   5  24    0.58    0.09 
  -1   5  24    0.54    0.08 
  -1  -5  26    0.36    0.10 
  -1   5  26    0.23    0.08 
  -1   5  26    0.41    0.08 
  -1  -5  28    4.01    0.23 
  -1   5  28    4.05    0.19 
  -1   5  28    4.12    0.20 
  -1  -5  30    1.53    0.17 
  -1   5  30    1.74    0.15 
  -1   5  30    1.79    0.15 
  -1  -5  32    3.11    0.22 
  -1   5  32    3.35    0.19 
  -1   5  32    3.05    0.20 
  -1  -5  34    1.83    0.19 
  -1   5  34    2.47    0.19 
  -1   5  34    2.44    0.18 
  -1   5  36    2.41    0.20 
   1  -6  33    1.44    0.17 
   1   6  33    1.62    0.16 
   1   6  33    1.91    0.17 
   1  -6  31    0.02    0.09 
   1  -6  31    0.05    0.07 
   1   6  31    0.18    0.08 
   1   6  31    0.06    0.08 
   1  -6  29    0.55    0.12 
   1  -6  29    0.58    0.11 
   1   6  29    0.68    0.11 
   1   6  29    0.66    0.11 
   1  -6  27    0.10    0.07 
   1  -6  27    0.14    0.08 
   1   6  27    0.10    0.07 
   1   6  27    0.06    0.06 
   1  -6  25    0.25    0.08 
   1  -6  25    0.54    0.11 
   1   6  25    0.39    0.09 
   1  -6  23    0.53    0.10 
   1   6  23    0.51    0.09 
   1  -6  21    0.81    0.11 
   1   6  21    0.74    0.10 
   1  -6  19    5.04    0.20 
   1   6  19    4.78    0.19 
   1  -6  17    7.20    0.23 
   1   6  17    6.86    0.23 
   1  -6  15    3.99    0.17 
   1   6  15    4.54    0.18 
   1  -6  13   36.26    0.61 
   1   6  13   36.39    0.62 
   1  -6  11    4.65    0.16 
  -1  -6 -11    4.82    0.13 
   1   6  11    4.55    0.17 
   1  -6   9   36.80    0.58 
  -1  -6  -9   37.32    0.54 
   1   6   9   35.24    0.60 
  -1  -6  -7   64.64    0.90 
   1  -6   7   64.72    0.92 
   1   6   7   65.52    0.95 
  -1   6  -7   64.17    0.87 
  -1  -6  -5   10.31    0.23 
   1  -6   5   10.10    0.22 
  -1   6  -5   10.28    0.20 
   1   6   5   10.44    0.24 
   1  -6   3  116.69    1.57 
   1   6   3  121.11    1.59 
  -1   6  -3  117.70    1.56 
   1  -6   1   41.90    0.62 
   1  -6   1   42.78    0.67 
  -1   6  -1   42.42    0.63 
   1   6   1   41.50    0.63 
   1  -6  -1   98.29    1.35 
   1   6  -1   98.98    1.32 
  -1   6   1   96.26    1.32 
   1  -6  -3  167.78    2.19 
  -1  -6   3  168.61    2.18 
  -1   6   3  163.09    2.18 
   1   6  -3  166.94    2.15 
   1  -6  -5    0.06    0.04 
  -1  -6   5    0.01    0.04 
  -1   6   5    0.04    0.03 
   1   6  -5    0.07    0.03 
  -1  -6   7  127.28    1.69 
   1  -6  -7  124.96    1.66 
   1   6  -7  125.18    1.62 
  -1   6   7  126.41    1.71 
  -1  -6   9   41.04    0.56 
  -1  -6   9   41.23    0.65 
   1  -6  -9   41.78    0.61 
  -1   6   9   40.86    0.66 
   1  -6 -11   33.81    0.50 
  -1  -6  11   33.86    0.56 
  -1   6  11   32.53    0.57 
  -1  -6  13  126.75    1.72 
  -1   6  13  123.36    1.73 
  -1  -6  15    1.11    0.11 
  -1   6  15    1.35    0.11 
  -1  -6  17   85.42    1.26 
  -1   6  17   84.36    1.25 
  -1  -6  19   36.07    0.65 
  -1   6  19   35.50    0.64 
  -1  -6  21    7.54    0.26 
  -1   6  21    7.35    0.24 
  -1  -6  23   44.41    0.80 
  -1   6  23   44.00    0.77 
  -1   6  23   45.71    0.77 
  -1  -6  25    1.23    0.14 
  -1   6  25    1.15    0.12 
  -1   6  25    1.20    0.12 
  -1  -6  27   25.29    0.58 
  -1   6  27   24.27    0.53 
  -1   6  27   25.42    0.54 
  -1  -6  29   20.15    0.52 
  -1   6  29   21.03    0.48 
  -1   6  29   19.93    0.48 
  -1  -6  31    0.59    0.11 
  -1  -6  31    0.36    0.12 
  -1   6  31    0.46    0.10 
  -1   6  31    0.50    0.17 
  -1  -6  33   12.84    0.43 
  -1   6  33   11.94    0.37 
   1  -7  32    1.63    0.17 
   1  -7  32    2.02    0.31 
   1  -7  30   11.05    0.39 
   1  -7  30   11.17    0.38 
   1   7  30   12.01    0.37 
   1  -7  28    5.48    0.26 
   1  -7  28    5.44    0.27 
   1   7  28    5.00    0.23 
   1  -7  26   13.06    0.40 
   1  -7  26   12.90    0.39 
   1   7  26   13.08    0.37 
   1  -7  24    3.25    0.20 
   1  -7  24    3.27    0.20 
   1   7  24    3.15    0.18 
   1  -7  22   22.70    0.52 
   1  -7  22   22.60    0.51 
   1   7  22   22.60    0.50 
   1  -7  20    5.42    0.23 
   1   7  20    5.77    0.23 
   1  -7  18    0.83    0.11 
   1   7  18    0.91    0.11 
   1  -7  16   35.11    0.62 
   1   7  16   33.87    0.63 
   1  -7  14    0.37    0.07 
   1   7  14    0.38    0.08 
   1  -7  12    0.89    0.09 
   1   7  12    0.77    0.09 
  -1  -7 -10   51.06    0.86 
   1  -7  10   50.64    0.78 
   1   7  10   51.19    0.81 
   1  -7   8    0.26    0.05 
  -1  -7  -8    0.22    0.05 
   1   7   8    0.28    0.06 
   1  -7   6    6.34    0.18 
  -1  -7  -6    6.36    0.18 
   1   7   6    6.16    0.19 
  -1   7  -6    6.73    0.16 
   1  -7   4   21.28    0.43 
   1  -7   4   20.82    0.37 
  -1  -7  -4   21.17    0.39 
  -1   7  -4   20.82    0.36 
   1   7   4   20.78    0.40 
   1  -7   2   11.44    0.24 
   1  -7   2   11.39    0.28 
  -1  -7  -2   11.90    0.27 
  -1   7  -2   11.84    0.25 
   1   7   2   11.39    0.26 
   1  -7   0    0.37    0.05 
   1  -7   0    0.24    0.06 
   1   7   0    0.20    0.05 
   1  -7  -2   13.32    0.30 
  -1  -7   2   13.58    0.28 
  -1   7   2   13.48    0.29 
   1   7  -2   13.60    0.27 
   1  -7  -4    4.56    0.16 
  -1  -7   4    4.60    0.15 
   1   7  -4    4.28    0.13 
  -1   7   4    4.24    0.15 
   1  -7  -6    0.95    0.08 
  -1  -7   6    0.94    0.08 
   1   7  -6    0.78    0.06 
  -1   7   6    0.88    0.09 
   1  -7  -8    5.53    0.17 
  -1  -7   8    5.67    0.18 
  -1   7   8    5.45    0.18 
   1  -7 -10    1.75    0.10 
  -1  -7  10    1.88    0.11 
  -1   7  10    1.53    0.11 
  -1  -7  12    3.53    0.15 
  -1   7  12    3.42    0.16 
  -1  -7  14    1.45    0.12 
  -1   7  14    1.40    0.11 
  -1  -7  16    2.66    0.15 
  -1   7  16    2.71    0.15 
  -1  -7  18    0.10    0.06 
  -1   7  18    0.03    0.06 
  -1  -7  20    9.66    0.30 
  -1   7  20    9.67    0.29 
  -1  -7  22    0.04    0.07 
  -1   7  22    0.01    0.06 
  -1  -7  24    0.21    0.08 
  -1   7  24    0.22    0.08 
  -1  -7  26    2.88    0.19 
  -1   7  26    2.51    0.17 
  -1  -7  28    2.48    0.21 
  -1   7  28    2.89    0.19 
  -1  -7  30    0.75    0.13 
  -1  -7  30    0.99    0.16 
  -1   7  30    0.76    0.12 
  -1  -7  32    4.33    0.25 
  -1   7  32    4.12    0.34 
   1  -8  29    0.07    0.09 
   1  -8  29    0.17    0.11 
   1  -8  27    0.08    0.10 
   1  -8  27    0.03    0.08 
   1   8  27   -0.03    0.08 
   1  -8  25    0.99    0.14 
   1  -8  25    0.89    0.13 
   1   8  25    0.92    0.13 
   1  -8  23    0.18    0.09 
   1  -8  23    0.29    0.09 
   1   8  23    0.17    0.08 
   1  -8  21    0.04    0.07 
   1  -8  21    0.04    0.07 
   1   8  21   -0.01    0.06 
   1  -8  19    1.62    0.16 
   1  -8  19    1.26    0.13 
   1   8  19    1.52    0.13 
   1  -8  17    2.37    0.16 
   1  -8  17    2.33    0.18 
   1   8  17    2.14    0.15 
   1  -8  15    0.22    0.08 
   1  -8  15    0.25    0.07 
   1   8  15    0.24    0.07 
   1  -8  13    4.95    0.19 
   1  -8  13    4.63    0.21 
   1   8  13    4.45    0.19 
   1  -8  11    2.32    0.13 
   1  -8  11    2.17    0.16 
   1   8  11    2.15    0.13 
   1  -8   9    3.71    0.15 
   1  -8   9    3.43    0.18 
   1   8   9    3.78    0.17 
   1  -8   7    6.30    0.19 
  -1  -8  -7    6.51    0.19 
   1  -8   7    6.46    0.24 
   1   8   7    6.11    0.21 
   1  -8   5    2.22    0.12 
  -1  -8  -5    2.32    0.12 
   1  -8   5    2.42    0.15 
   1   8   5    2.02    0.13 
   1  -8   3   22.34    0.46 
  -1  -8  -3   22.38    0.43 
   1  -8   3   21.86    0.41 
   1   8   3   22.65    0.43 
  -1   8  -3   22.74    0.40 
  -1  -8  -1   12.10    0.30 
   1  -8   1   12.27    0.27 
   1  -8   1   12.29    0.31 
  -1   8  -1   12.35    0.27 
   1   8   1   11.83    0.28 
   1  -8  -1    7.96    0.24 
   1  -8  -1    7.44    0.20 
  -1  -8   1    7.75    0.21 
  -1  -8   1    7.65    0.24 
  -1   8   1    7.72    0.21 
   1   8  -1    7.76    0.21 
   1  -8  -3   23.97    0.46 
  -1  -8   3   23.51    0.44 
   1   8  -3   24.13    0.42 
  -1   8   3   23.31    0.45 
  -1  -8   5    0.39    0.07 
   1  -8  -5    0.28    0.07 
  -1   8   5    0.31    0.06 
  -1  -8   7   22.15    0.43 
   1  -8  -7   22.77    0.42 
  -1   8   7   21.57    0.44 
   1  -8  -9    6.78    0.27 
  -1  -8   9    6.33    0.21 
  -1   8   9    6.49    0.22 
  -1  -8  11    7.12    0.23 
  -1   8  11    7.29    0.24 
  -1  -8  13   36.20    0.65 
  -1   8  13   37.33    0.67 
  -1  -8  15    2.31    0.15 
  -1   8  15    2.77    0.16 
  -1  -8  17   15.34    0.38 
  -1   8  17   15.32    0.39 
  -1  -8  19    9.69    0.31 
  -1   8  19   10.15    0.31 
  -1  -8  21    1.75    0.16 
  -1   8  21    2.04    0.15 
  -1  -8  23    9.80    0.33 
  -1   8  23   10.40    0.33 
  -1  -8  25    1.53    0.16 
  -1   8  25    1.52    0.15 
  -1  -8  27    4.61    0.26 
  -1  -8  27    4.43    0.25 
  -1   8  27    4.39    0.24 
  -1  -8  29    5.05    0.28 
  -1  -8  29    5.60    0.28 
  -1   8  29    5.69    0.38 
   1  -9  28    5.48    0.30 
   1  -9  26   23.51    0.57 
   1  -9  26   21.82    0.64 
   1  -9  24    4.43    0.25 
   1  -9  24    4.57    0.26 
   1   9  24    4.42    0.24 
   1  -9  22   28.00    0.65 
   1  -9  22   28.34    0.62 
   1   9  22   29.44    0.63 
   1  -9  20   19.48    0.51 
   1  -9  20   19.80    0.48 
   1   9  20   19.08    0.48 
   1  -9  18    0.02    0.08 
   1  -9  18   -0.02    0.07 
   1   9  18    0.03    0.06 
   1  -9  16   36.54    0.68 
   1  -9  16   36.38    0.74 
   1   9  16   36.54    0.70 
   1  -9  14    3.34    0.20 
   1  -9  14    3.43    0.18 
   1   9  14    3.45    0.19 
   1  -9  12   10.70    0.35 
   1  -9  12   10.73    0.29 
   1   9  12   10.76    0.31 
   1  -9  10   39.67    0.67 
   1  -9  10   38.41    0.74 
   1   9  10   39.54    0.71 
   1  -9   8    0.46    0.08 
   1  -9   8    0.53    0.10 
   1   9   8    0.45    0.08 
   1  -9   6   26.14    0.55 
  -1  -9  -6   25.27    0.48 
   1  -9   6   25.28    0.47 
   1   9   6   25.34    0.50 
   1  -9   4   13.76    0.43 
  -1  -9  -4   13.12    0.32 
   1  -9   4   13.84    0.36 
   1   9   4   13.55    0.33 
  -1  -9  -2   10.73    0.29 
   1  -9   2   10.88    0.31 
   1   9   2   10.63    0.28 
  -1  -9   0    8.52    0.26 
  -1  -9   0    8.57    0.23 
   1  -9   0    8.34    0.26 
  -1   9   0    8.51    0.23 
   1   9   0    8.63    0.23 
   1  -9  -2    1.84    0.14 
  -1  -9   2    1.90    0.14 
  -1  -9   2    2.00    0.12 
  -1   9   2    1.85    0.12 
  -1  -9   4   11.28    0.28 
  -1  -9   4   11.48    0.32 
   1  -9  -4   10.94    0.29 
  -1   9   4   11.00    0.29 
  -1  -9   6    4.82    0.18 
   1  -9  -6    4.69    0.19 
  -1  -9   6    4.81    0.21 
  -1   9   6    4.89    0.19 
  -1  -9   8    1.18    0.11 
  -1   9   8    1.29    0.12 
  -1  -9  10    1.48    0.12 
  -1   9  10    1.44    0.14 
  -1  -9  12    0.08    0.06 
  -1   9  12    0.00    0.05 
  -1  -9  14    1.34    0.13 
  -1   9  14    1.28    0.13 
  -1  -9  16    0.11    0.07 
  -1   9  16    0.18    0.08 
  -1  -9  18    0.04    0.07 
  -1   9  18   -0.04    0.06 
  -1  -9  20   12.14    0.36 
  -1   9  20   12.04    0.37 
  -1  -9  22    1.41    0.16 
  -1  -9  22    1.19    0.15 
  -1   9  22    1.21    0.14 
  -1  -9  24    1.71    0.18 
  -1  -9  24    1.91    0.19 
  -1   9  24    1.58    0.16 
  -1  -9  26    9.69    0.36 
  -1  -9  26    9.01    0.40 
   1 -10  21    0.16    0.09 
   1  10  21    0.04    0.08 
   1 -10  19   -0.06    0.08 
   1  10  19   -0.05    0.07 
   1 -10  17    0.22    0.11 
   1  10  17    0.29    0.09 
   1 -10  15    0.90    0.14 
   1  10  15    0.96    0.13 
   1 -10  13    0.02    0.08 
   1  10  13    0.00    0.06 
   1 -10  11    0.34    0.09 
   1  10  11    0.46    0.09 
   1 -10   9    0.55    0.11 
   1  10   9    0.48    0.09 
   1 -10   7   -0.03    0.07 
   1  10   7    0.04    0.06 
   1 -10   5    0.02    0.08 
   1  10   5    0.01    0.06 
  -1 -10  -3    0.14    0.07 
   1 -10   3    0.08    0.08 
   1  10   3    0.13    0.06 
  -1 -10  -1    1.91    0.15 
   1 -10   1    2.09    0.16 
   1  10   1    2.36    0.18 
   1 -10  -1    0.62    0.10 
  -1 -10   1    0.52    0.10 
  -1  10   1    0.64    0.14 
   1 -10  -3    0.11    0.07 
  -1 -10   3    0.23    0.08 
  -1  10   3    0.11    0.06 
  -1 -10   5   -0.02    0.08 
   1 -10  -5   -0.04    0.08 
  -1  10   5    0.07    0.06 
  -1 -10   7    0.01    0.07 
  -1  10   7    0.08    0.06 
  -1 -10   9    0.21    0.09 
  -1  10   9    0.23    0.08 
  -1 -10  11    0.06    0.09 
  -1  10  11    0.12    0.07 
  -1 -10  13    0.25    0.10 
  -1 -10  13    0.24    0.09 
  -1  10  13    0.24    0.08 
  -1 -10  15    0.69    0.12 
  -1 -10  15    0.56    0.11 
  -1  10  15    0.70    0.12 
  -1 -10  17    0.22    0.09 
  -1 -10  17    0.13    0.09 
  -1  10  17    0.25    0.09 
  -1 -10  19    0.45    0.12 
  -1 -10  19    0.50    0.11 
  -1  10  19    0.62    0.11 
  -1 -10  21    0.29    0.11 
  -1 -10  21    0.26    0.11 
  -1  10  21    0.53    0.11 
  -1 -10  23    0.03    0.10 
  -1 -10  25    0.18    0.18 
   1 -11  16   21.14    0.58 
   1  11  16   21.03    0.52 
   1 -11  14    2.28    0.21 
   1  11  14    2.20    0.18 
   1 -11  12    9.38    0.36 
   1  11  12    9.26    0.32 
   1 -11  10   21.66    0.55 
   1  11  10   21.16    0.50 
   1 -11   8    0.05    0.09 
   1  11   8    0.15    0.07 
   1 -11   6   15.93    0.45 
   1  11   6   15.76    0.40 
   1 -11   4    8.35    0.31 
   1 -11   2    3.52    0.21 
   1 -11   0    4.07    0.22 
  -1 -11   0    3.79    0.22 
   1 -11  -2    0.21    0.09 
  -1 -11   2    0.20    0.09 
  -1 -11   4    5.30    0.25 
  -1 -11   6    0.92    0.13 
  -1  11   6    0.92    0.11 
  -1 -11   8    0.15    0.09 
  -1  11   8    0.05    0.07 
  -1 -11  10    0.34    0.11 
  -1  11  10    0.35    0.10 
  -1 -11  12    0.36    0.11 
  -1  11  12    0.32    0.09 
  -1 -11  14    0.08    0.09 
  -1  11  14    0.12    0.08 
  -1 -11  16    0.38    0.12 
  -1  11  16    0.31    0.10 
   1  12  11    0.15    0.09 
   1 -12   9    3.48    0.24 
   1  12   9    3.48    0.21 
   1 -12   7    1.11    0.15 
   1 -12   5    1.19    0.16 
   1 -12   3    5.43    0.27 
   1 -12   1    0.08    0.09 
  -1 -12   1    3.37    0.22 
  -1 -12   3    5.59    0.27 
  -1 -12   5    0.11    0.09 
  -1 -12   7    5.36    0.28 
  -1 -12   9    2.71    0.22 
  -1  12   9    3.14    0.20 
  -1  12  11    1.24    0.15 
   2   0  36   13.92    0.44 
   2   0  34    1.39    0.16 
   2   0  32   62.37    1.08 
   2   0  30    0.05    0.08 
   2   0  28    5.92    0.25 
   2   0  26   52.35    0.89 
   2   0  24    0.63    0.10 
   2   0  22    6.41    0.22 
   2   0  20   12.98    0.24 
   2   0  20   12.94    0.25 
   2   0  20   13.03    0.31 
   2   0  18   44.80    0.63 
   2   0  18   43.67    0.62 
   2   0  18   43.71    0.71 
   2   0  16   46.91    0.74 
   2   0  16   49.55    0.68 
   2   0  14    2.13    0.08 
   2   0  14    2.36    0.11 
   2   0  12   42.05    0.57 
   2   0  12   40.97    0.62 
   2   0  10  174.36    2.30 
   2   0  10  175.07    2.26 
   2   0  10  177.22    2.34 
   2   0   8    0.32    0.04 
   2   0   8    0.26    0.05 
   2   0   8    0.20    0.04 
   2   0   6   83.57    1.15 
   2   0   6   82.60    1.09 
  -2   0  -6   85.29    1.16 
   2   0   4  281.83    3.77 
  -2   0  -4  284.44    3.67 
   2   0   4  285.99    3.67 
   2   0   2  180.36    2.32 
   2   0   2  175.83    2.33 
  -2   0  -2  176.63    2.32 
  -2   0   0    1.36    0.03 
  -2   0   2   57.05    0.77 
  -2   0   2   56.54    0.77 
  -2   0   4  412.39    7.05 
  -2   0   4  423.07    7.65 
  -2   0   6   11.32    0.17 
  -2   0   6   11.41    0.19 
  -2   0   8  148.22    1.98 
  -2   0  10  757.61   10.03 
  -2   0  10  777.56    9.79 
  -2   0  12    6.58    0.16 
  -2   0  12    6.26    0.13 
  -2   0  14  139.30    1.84 
  -2   0  14  138.39    1.78 
  -2   0  16  333.71    4.37 
  -2   0  16  329.02    4.50 
  -2   0  18  106.86    1.50 
  -2   0  18  108.58    1.42 
  -2   0  20  109.70    1.45 
  -2   0  20  110.09    1.55 
  -2   0  22   57.83    0.81 
  -2   0  22   55.83    0.90 
  -2   0  24  138.38    1.96 
  -2   0  24  140.90    1.84 
  -2   0  26   58.14    0.96 
  -2   0  28    4.45    0.21 
  -2   0  30   86.81    1.37 
  -2   0  32    0.48    0.10 
  -2   0  34    4.52    0.25 
  -2   0  36   53.65    1.01 
  -2   0  38    4.97    0.35 
   2  -1  37    0.04    0.09 
   2   1  37    0.03    0.09 
   2  -1  35    1.56    0.17 
   2   1  35    1.29    0.16 
   2  -1  33    2.05    0.19 
   2   1  33    1.95    0.17 
   2  -1  31    0.73    0.12 
   2   1  31    0.77    0.13 
   2  -1  29    7.82    0.29 
   2   1  29    7.94    0.29 
   2  -1  27    1.59    0.15 
   2   1  27    1.59    0.15 
   2  -1  25    8.29    0.27 
   2   1  25    8.48    0.21 
   2   1  25    7.70    0.27 
   2  -1  23   19.86    0.44 
   2  -1  23   19.84    0.36 
   2   1  23   20.20    0.44 
   2   1  23   20.05    0.37 
   2  -1  21    2.46    0.15 
  -2   1 -21    2.43    0.10 
   2   1  21    2.37    0.11 
   2   1  21    2.76    0.15 
   2  -1  19    9.60    0.26 
   2   1  19    9.33    0.26 
  -2   1 -19    9.88    0.18 
   2   1  19    9.42    0.21 
   2  -1  17   16.83    0.35 
  -2   1 -17   17.23    0.27 
   2   1  17   16.85    0.35 
   2   1  17   16.95    0.26 
   2   1  17   17.14    0.30 
   2   1  15    2.87    0.13 
   2   1  15    2.96    0.07 
   2   1  15    3.11    0.10 
  -2   1 -15    3.11    0.08 
   2  -1  13    5.41    0.16 
   2   1  13    5.43    0.13 
  -2   1 -13    5.48    0.11 
   2   1  13    5.54    0.16 
   2   1  13    5.36    0.10 
   2  -1  11    0.06    0.04 
   2   1  11    0.07    0.02 
   2   1  11    0.05    0.04 
  -2   1 -11    0.11    0.02 
   2   1  11    0.14    0.03 
   2  -1   9   31.99    0.48 
   2   1   9   30.93    0.48 
   2   1   9   31.51    0.46 
   2   1   9   32.92    0.41 
  -2   1  -9   32.02    0.43 
   2  -1   7   15.57    0.26 
  -2   1  -7   16.00    0.22 
   2   1   7   15.99    0.26 
   2   1   7   16.05    0.25 
   2  -1   5   10.75    0.18 
  -2   1  -5   11.22    0.16 
   2   1   5   10.29    0.18 
   2   1   5   10.85    0.18 
   2  -1   3   34.17    0.44 
   2  -1   3   31.77    0.45 
   2   1   3   32.21    0.44 
  -2   1  -3   33.31    0.43 
   2  -1   1    8.05    0.14 
   2  -1   1    8.40    0.12 
  -2  -1  -1    8.05    0.13 
  -2   1  -1    8.31    0.13 
   2  -1  -1   54.49    0.72 
  -2  -1   1   56.78    0.78 
  -2   1   1   55.79    0.71 
  -2  -1   3   51.07    0.68 
  -2  -1   3   52.33    0.69 
   2  -1  -3   53.91    0.74 
  -2   1   3   52.29    0.72 
  -2  -1   5   10.21    0.17 
  -2  -1   5   10.51    0.15 
  -2   1   5   10.49    0.17 
  -2   1   5   10.56    0.17 
  -2  -1   7   60.89    0.82 
  -2  -1   7   61.27    0.80 
  -2   1   7   62.26    0.81 
  -2   1   7   61.89    0.82 
  -2  -1   9   19.56    0.27 
  -2  -1   9   19.90    0.32 
  -2   1   9   19.90    0.30 
  -2   1   9   19.66    0.32 
  -2  -1  11    1.10    0.04 
  -2  -1  11    1.05    0.07 
  -2   1  11    1.13    0.06 
  -2   1  11    1.19    0.07 
  -2  -1  13    4.12    0.13 
  -2  -1  13    4.23    0.09 
  -2   1  13    4.10    0.13 
  -2   1  13    4.37    0.11 
  -2  -1  15    0.04    0.02 
  -2  -1  15    0.11    0.04 
  -2   1  15    0.04    0.04 
  -2   1  15    0.00    0.02 
  -2  -1  17    0.64    0.04 
  -2  -1  17    0.53    0.07 
  -2   1  17    0.63    0.06 
  -2   1  17    0.49    0.07 
  -2  -1  19    1.39    0.11 
  -2  -1  19    1.42    0.06 
  -2   1  19    1.44    0.08 
  -2   1  19    1.50    0.11 
  -2  -1  21    0.10    0.06 
  -2  -1  21    0.11    0.03 
  -2   1  21    0.06    0.05 
  -2   1  21    0.08    0.04 
  -2  -1  23    0.39    0.08 
  -2   1  23    0.36    0.07 
  -2   1  23    0.36    0.05 
  -2  -1  25    0.30    0.08 
  -2   1  25    0.31    0.08 
  -2   1  25    0.22    0.05 
  -2  -1  27    0.24    0.08 
  -2   1  27    0.34    0.08 
  -2   1  27    0.45    0.07 
  -2  -1  29    0.87    0.13 
  -2   1  29    0.58    0.10 
  -2  -1  31    0.17    0.09 
  -2   1  31    0.17    0.08 
  -2  -1  33    0.11    0.08 
  -2   1  33    0.07    0.08 
  -2  -1  35    0.19    0.09 
  -2   1  35    0.24    0.10 
  -2  -1  37    0.98    0.15 
  -2   1  37    0.92    0.13 
   2  -2  36    5.08    0.28 
   2   2  36    5.31    0.27 
   2  -2  34    4.95    0.27 
   2   2  34    4.77    0.25 
   2  -2  32   32.36    0.69 
   2   2  32   33.58    0.69 
   2  -2  30    0.62    0.12 
   2   2  30    0.59    0.10 
   2  -2  28    2.14    0.17 
   2   2  28    2.36    0.17 
   2   2  28    2.23    0.13 
   2  -2  26   36.19    0.69 
   2   2  26   35.68    0.68 
   2   2  26   36.59    0.61 
   2  -2  24    0.17    0.07 
   2  -2  24    0.12    0.05 
   2   2  24    0.18    0.05 
   2   2  24    0.36    0.08 
   2  -2  22    0.40    0.08 
   2   2  22    0.46    0.06 
   2   2  22    0.44    0.08 
   2  -2  20   35.46    0.62 
   2   2  20   34.47    0.61 
   2   2  20   35.61    0.57 
   2  -2  18   19.44    0.39 
   2   2  18   18.23    0.38 
   2   2  18   18.60    0.34 
   2   2  16    0.09    0.04 
   2  -2  14   43.61    0.68 
   2   2  14   44.10    0.67 
   2   2  14   45.03    0.65 
  -2   2 -14   43.22    0.57 
   2  -2  12   25.98    0.43 
   2   2  12   26.45    0.43 
  -2   2 -12   25.37    0.34 
   2   2  12   26.04    0.41 
   2  -2  10    7.43    0.17 
  -2   2 -10    7.19    0.11 
   2   2  10    7.42    0.16 
   2   2  10    7.10    0.17 
   2  -2   8   42.90    0.60 
  -2   2  -8   42.56    0.54 
   2   2   8   40.97    0.60 
   2  -2   6   12.37    0.21 
   2   2   6   12.10    0.21 
  -2   2  -6   12.68    0.17 
   2   2   6   11.75    0.21 
   2  -2   4   30.25    0.43 
   2   2   4   30.79    0.44 
  -2   2  -4   31.28    0.40 
   2  -2   2  130.63    1.77 
   2  -2   2  130.17    1.84 
   2   2   2  130.83    1.83 
  -2   2  -2  125.42    1.73 
   2  -2   0   14.24    0.19 
   2  -2   0   14.13    0.22 
   2   2   0   13.98    0.21 
  -2   2   0   13.71    0.21 
   2  -2  -2   71.73    0.99 
  -2  -2   2   70.93    0.97 
  -2   2   2   70.47    0.92 
  -2  -2   4   63.98    0.83 
   2  -2  -4   62.26    0.81 
  -2  -2   4   61.94    0.83 
  -2   2   4   62.90    0.83 
  -2   2   4   60.93    0.84 
  -2  -2   6   42.05    0.58 
  -2  -2   6   41.49    0.53 
   2  -2  -6   41.55    0.55 
  -2   2   6   41.29    0.56 
  -2  -2   8    3.15    0.05 
  -2  -2   8    3.14    0.10 
  -2   2   8    3.16    0.09 
  -2   2   8    3.15    0.09 
  -2  -2  10  163.32    4.28 
  -2  -2  10  159.45    2.03 
  -2   2  10  159.02    2.18 
  -2   2  10  159.38    2.24 
  -2  -2  12    2.29    0.05 
  -2   2  12    2.21    0.09 
  -2   2  12    2.19    0.09 
  -2  -2  14   19.27    0.36 
  -2  -2  14   19.08    0.26 
  -2   2  14   19.21    0.33 
  -2   2  14   18.83    0.34 
  -2  -2  16  144.15    1.83 
  -2  -2  16  145.72    1.94 
  -2   2  16  139.28    1.91 
  -2   2  16  146.47    1.89 
  -2  -2  18   21.25    0.41 
  -2  -2  18   20.39    0.29 
  -2   2  18   20.35    0.39 
  -2   2  18   20.01    0.36 
  -2  -2  20   27.68    0.52 
  -2   2  20   28.72    0.48 
  -2   2  20   28.68    0.52 
  -2  -2  22   27.66    0.54 
  -2   2  22   27.76    0.47 
  -2   2  22   26.68    0.52 
  -2  -2  24   66.78    1.06 
  -2   2  24   67.72    1.05 
  -2   2  24   67.05    0.98 
  -2  -2  26   34.27    0.66 
  -2   2  26   34.57    0.58 
  -2   2  26   35.20    0.65 
  -2  -2  28    8.21    0.30 
  -2   2  28    8.55    0.24 
  -2   2  28    8.43    0.28 
  -2  -2  30   59.44    1.04 
  -2   2  30   61.16    0.94 
  -2   2  30   61.96    1.03 
  -2  -2  32    2.84    0.20 
  -2   2  32    3.14    0.20 
  -2  -2  34    0.43    0.12 
  -2   2  34    0.29    0.10 
  -2  -2  36   39.53    0.83 
  -2   2  36   40.70    0.82 
  -2   2  38    0.61    0.15 
   2  -3  35    5.24    0.28 
   2   3  35    5.72    0.28 
   2  -3  33   10.35    0.37 
   2   3  33   10.11    0.35 
   2  -3  31    1.47    0.16 
   2   3  31    1.75    0.16 
   2   3  31    1.73    0.14 
   2  -3  29   18.77    0.48 
   2   3  29   19.22    0.41 
   2   3  29   19.52    0.47 
   2  -3  27    2.07    0.19 
   2  -3  27    2.10    0.17 
   2   3  27    2.35    0.15 
   2   3  27    2.17    0.13 
   2  -3  25   33.98    0.66 
   2  -3  25   34.04    0.60 
   2   3  25   34.46    0.60 
   2   3  25   34.12    0.65 
   2  -3  23   27.27    0.55 
   2   3  23   28.27    0.55 
   2   3  23   27.60    0.50 
   2  -3  21    0.58    0.09 
   2   3  21    0.58    0.08 
   2   3  21    0.38    0.06 
   2  -3  19   89.97    1.30 
   2   3  19   88.39    1.25 
   2   3  19   87.97    1.28 
   2  -3  17   19.50    0.40 
   2   3  17   20.22    0.38 
   2   3  17   20.09    0.39 
   2  -3  15   62.49    0.94 
   2   3  15   64.24    0.93 
   2   3  15   63.84    0.92 
   2  -3  13  122.95    1.66 
   2   3  13  123.22    1.64 
   2   3  13  123.29    1.65 
   2  -3  11    2.01    0.10 
   2   3  11    1.81    0.09 
   2   3  11    2.02    0.09 
   2  -3   9  229.76    3.15 
  -2  -3  -9  225.97    2.86 
   2   3   9  226.80    3.16 
  -2   3  -9  221.83    2.85 
   2   3   9  223.23    3.09 
   2  -3   7  171.01    2.37 
  -2   3  -7  169.09    2.21 
   2   3   7  168.31    2.26 
   2  -3   5   13.43    0.22 
   2   3   5   13.18    0.24 
  -2   3  -5   13.24    0.20 
   2  -3   3  201.18    2.74 
   2  -3   3  201.41    2.76 
  -2   3  -3  200.76    2.68 
   2   3   3  199.00    2.73 
   2  -3   1   18.97    0.31 
   2  -3   1   19.08    0.28 
  -2   3  -1   19.03    0.29 
   2   3   1   19.07    0.30 
   2  -3  -1   45.36    0.63 
  -2   3   1   45.70    0.62 
   2   3  -1   45.20    0.61 
  -2  -3   3  106.94    1.39 
   2  -3  -3  107.76    1.39 
  -2   3   3  107.33    1.51 
   2   3  -3  107.39    1.49 
  -2  -3   5   11.96    0.18 
  -2  -3   5   12.05    0.22 
   2  -3  -5   12.11    0.20 
  -2   3   5   11.75    0.22 
  -2  -3   7   68.26    0.87 
   2  -3  -7   68.54    0.89 
  -2  -3   7   67.61    0.93 
  -2   3   7   68.62    0.93 
  -2   3   7   66.74    0.90 
  -2  -3   9   24.83    0.31 
   2  -3  -9   24.35    0.35 
  -2  -3   9   24.29    0.40 
  -2   3   9   23.46    0.39 
  -2   3   9   23.89    0.37 
  -2  -3  11    7.73    0.19 
  -2   3  11    8.02    0.19 
  -2   3  11    7.99    0.17 
  -2   3  13    8.83    0.20 
  -2   3  13    8.66    0.20 
  -2  -3  15    0.15    0.05 
  -2   3  15    0.09    0.04 
  -2   3  15    0.08    0.03 
  -2  -3  17   16.09    0.34 
  -2   3  17   15.57    0.32 
  -2   3  17   15.17    0.31 
  -2  -3  19    1.31    0.11 
  -2   3  19    1.25    0.09 
  -2   3  19    1.48    0.10 
  -2  -3  21    0.71    0.10 
  -2   3  21    0.68    0.08 
  -2   3  21    0.73    0.09 
  -2  -3  23    0.92    0.11 
  -2   3  23    0.76    0.09 
  -2   3  23    1.08    0.09 
  -2  -3  25    0.68    0.11 
  -2   3  25    0.56    0.08 
  -2   3  25    0.54    0.09 
  -2  -3  27    0.87    0.12 
  -2   3  27    0.93    0.10 
  -2   3  27    1.07    0.12 
  -2  -3  29    0.51    0.11 
  -2   3  29    0.69    0.11 
  -2   3  29    0.52    0.08 
  -2  -3  31    0.65    0.12 
  -2   3  31    0.91    0.12 
  -2   3  31    0.95    0.10 
  -2  -3  33    3.01    0.22 
  -2   3  33    2.53    0.19 
  -2  -3  35    0.26    0.11 
  -2   3  35    0.24    0.10 
  -2   3  37    4.83    0.26 
   2   4  36    0.38    0.11 
   2  -4  34    3.63    0.25 
   2   4  34    3.65    0.23 
   2  -4  32   11.10    0.38 
   2   4  32   10.15    0.31 
   2   4  32   10.04    0.34 
   2  -4  30    2.51    0.20 
   2   4  30    2.70    0.19 
   2   4  30    2.72    0.17 
   2  -4  28    0.22    0.07 
   2  -4  28    0.35    0.10 
   2   4  28    0.34    0.09 
   2   4  28    0.17    0.07 
   2  -4  26    7.09    0.27 
   2  -4  26    7.08    0.24 
   2   4  26    7.07    0.25 
   2   4  26    7.46    0.24 
   2  -4  24    1.80    0.13 
   2  -4  24    1.83    0.15 
   2   4  24    1.78    0.14 
   2   4  24    1.99    0.13 
   2  -4  22    2.11    0.15 
   2   4  22    1.71    0.13 
   2   4  22    1.97    0.12 
   2  -4  20    5.42    0.21 
   2   4  20    5.45    0.19 
   2   4  20    4.97    0.19 
   2  -4  18   13.99    0.33 
   2   4  18   14.65    0.33 
   2   4  18   14.38    0.32 
   2  -4  16   11.40    0.28 
   2   4  16   11.23    0.27 
   2   4  16   12.06    0.28 
   2  -4  14    6.95    0.20 
   2   4  14    6.83    0.19 
   2   4  14    6.77    0.19 
   2  -4  12   29.97    0.49 
   2   4  12   30.05    0.50 
   2   4  12   29.61    0.49 
  -2  -4 -10   25.42    0.35 
   2  -4  10   25.34    0.42 
   2   4  10   25.55    0.43 
  -2   4 -10   25.25    0.33 
  -2  -4  -8    9.34    0.16 
   2  -4   8    9.35    0.20 
  -2   4  -8    9.36    0.15 
   2   4   8    9.13    0.21 
   2  -4   6   14.48    0.26 
   2   4   6   14.96    0.28 
  -2   4  -6   14.80    0.23 
   2  -4   4   23.62    0.36 
  -2   4  -4   23.48    0.35 
   2   4   4   23.91    0.38 
   2  -4   2   75.70    1.04 
   2  -4   2   75.58    0.99 
   2   4   2   75.98    1.01 
  -2   4  -2   73.67    0.99 
   2  -4   0    3.48    0.11 
   2   4   0    3.29    0.10 
  -2   4   0    3.47    0.10 
   2  -4  -2   49.71    0.70 
   2   4  -2   50.22    0.68 
  -2   4   2   48.61    0.69 
  -2  -4   4   60.44    0.82 
   2  -4  -4   58.58    0.81 
   2   4  -4   58.32    0.78 
  -2   4   4   59.22    0.82 
  -2  -4   6    0.39    0.04 
   2  -4  -6    0.50    0.05 
  -2  -4   6    0.52    0.03 
  -2   4   6    0.45    0.05 
  -2  -4   8    1.35    0.04 
  -2  -4   8    1.26    0.08 
   2  -4  -8    1.18    0.06 
  -2   4   8    1.08    0.07 
  -2  -4  10   66.39    0.93 
   2  -4 -10   65.33    0.87 
  -2  -4  10   65.69    0.82 
  -2   4  10   63.55    0.89 
  -2   4  10   65.52    0.93 
  -2  -4  12    3.71    0.14 
  -2   4  12    3.81    0.12 
  -2   4  12    3.45    0.13 
  -2  -4  14    0.05    0.04 
  -2   4  14    0.11    0.04 
  -2   4  14    0.09    0.04 
  -2  -4  16   65.66    0.99 
  -2   4  16   66.55    0.98 
  -2   4  16   67.31    0.96 
  -2  -4  18   10.16    0.27 
  -2   4  18   10.74    0.26 
  -2   4  18   10.27    0.26 
  -2  -4  20    0.04    0.06 
  -2   4  20   -0.03    0.04 
  -2   4  20    0.08    0.05 
  -2  -4  22    6.95    0.25 
  -2   4  22    6.97    0.22 
  -2   4  22    7.23    0.22 
  -2  -4  24   24.77    0.53 
  -2   4  24   24.52    0.48 
  -2   4  24   24.78    0.50 
  -2  -4  26    1.47    0.15 
  -2   4  26    1.43    0.13 
  -2   4  26    1.36    0.12 
  -2  -4  28    4.73    0.23 
  -2   4  28    4.61    0.21 
  -2   4  28    4.29    0.19 
  -2  -4  30   16.55    0.46 
  -2   4  30   16.45    0.43 
  -2   4  30   16.33    0.39 
  -2  -4  32    0.22    0.10 
  -2   4  32    0.22    0.08 
  -2   4  32    0.28    0.09 
  -2  -4  34    0.02    0.09 
  -2   4  34    0.08    0.08 
  -2   4  36    8.98    0.34 
   2   5  35    7.34    0.31 
   2  -5  33   13.19    0.43 
   2   5  33   13.48    0.41 
   2   5  33   12.94    0.37 
   2  -5  31    1.59    0.17 
   2   5  31    1.78    0.15 
   2   5  31    1.76    0.17 
   2  -5  29   36.06    0.70 
   2  -5  29   36.95    0.75 
   2   5  29   37.39    0.73 
   2   5  29   37.43    0.69 
   2  -5  27    6.71    0.25 
   2  -5  27    6.82    0.28 
   2   5  27    6.50    0.25 
   2   5  27    6.98    0.25 
   2  -5  25   28.11    0.57 
   2  -5  25   28.65    0.60 
   2   5  25   28.54    0.58 
   2   5  25   28.66    0.56 
   2  -5  23   47.66    0.83 
   2  -5  23   46.99    0.82 
   2   5  23   48.09    0.80 
   2   5  23   48.91    0.82 
   2  -5  21    0.26    0.08 
   2   5  21    0.37    0.07 
   2   5  21    0.36    0.07 
   2  -5  19  108.30    1.56 
   2   5  19  112.03    1.56 
   2   5  19  108.33    1.55 
   2  -5  17   48.37    0.78 
   2   5  17   47.66    0.77 
   2  -5  15   43.37    0.69 
   2   5  15   41.65    0.69 
   2  -5  13  140.82    1.91 
   2   5  13  143.24    1.92 
  -2  -5 -11    3.62    0.09 
   2  -5  11    3.51    0.13 
   2   5  11    3.28    0.13 
  -2  -5  -9  170.91    2.24 
   2  -5   9  168.18    2.22 
  -2   5  -9  168.27    2.20 
   2   5   9  175.09    2.25 
  -2  -5  -7   84.34    1.12 
   2  -5   7   82.31    1.14 
  -2   5  -7   84.44    1.09 
   2   5   7   84.88    1.17 
   2  -5   5   28.95    0.45 
  -2   5  -5   28.97    0.43 
   2   5   5   29.78    0.48 
   2  -5   3  250.44    3.52 
   2  -5   3  244.87    3.36 
   2   5   3  257.33    3.51 
  -2   5  -3  247.47    3.38 
   2  -5   1   16.97    0.32 
   2  -5   1   16.40    0.28 
   2   5   1   17.00    0.30 
  -2   5  -1   16.72    0.29 
   2  -5  -1   86.30    1.19 
  -2   5   1   86.28    1.17 
   2   5  -1   87.80    1.16 
  -2  -5   3  125.48    1.69 
   2  -5  -3  130.41    1.69 
   2   5  -3  127.71    1.66 
  -2   5   3  128.82    1.69 
  -2  -5   5   15.61    0.29 
   2  -5  -5   15.87    0.29 
   2   5  -5   15.67    0.26 
  -2   5   5   15.56    0.30 
  -2  -5   7   93.45    1.21 
   2  -5  -7   94.07    1.25 
  -2  -5   7   95.42    1.28 
  -2   5   7   92.76    1.29 
  -2  -5   9   19.73    0.36 
  -2  -5   9   19.34    0.28 
   2  -5  -9   19.76    0.33 
  -2   5   9   20.05    0.37 
  -2  -5  11   27.13    0.48 
  -2  -5  11   27.93    0.37 
   2  -5 -11   28.12    0.42 
  -2  -5  13   35.51    0.59 
   2  -5 -13   34.37    0.50 
  -2  -5  15    1.03    0.10 
  -2   5  15    1.05    0.08 
  -2   5  15    1.08    0.09 
  -2  -5  17    8.64    0.25 
  -2   5  17    8.70    0.23 
  -2   5  17    9.04    0.25 
  -2  -5  19    2.05    0.14 
  -2   5  19    2.06    0.12 
  -2   5  19    2.08    0.12 
  -2  -5  21    1.72    0.13 
  -2   5  21    1.66    0.11 
  -2   5  21    1.73    0.12 
  -2  -5  23    0.19    0.08 
  -2   5  23    0.00    0.05 
  -2   5  23    0.15    0.06 
  -2  -5  25    0.14    0.07 
  -2   5  25    0.12    0.06 
  -2   5  25    0.09    0.06 
  -2  -5  27    0.83    0.12 
  -2   5  27    0.76    0.10 
  -2   5  27    0.88    0.11 
  -2  -5  29    0.94    0.14 
  -2   5  29    0.91    0.12 
  -2   5  29    0.69    0.10 
  -2  -5  31    0.93    0.14 
  -2   5  31    1.08    0.13 
  -2   5  31    0.94    0.12 
  -2  -5  33    6.00    0.30 
  -2   5  33    5.42    0.24 
  -2   5  33    5.75    0.26 
  -2   5  35    1.27    0.15 
  -2   5  35    1.29    0.14 
   2   6  34    1.31    0.15 
   2  -6  32    0.12    0.10 
   2   6  32   -0.06    0.07 
   2  -6  30    6.83    0.28 
   2  -6  30    6.93    0.31 
   2   6  30    6.74    0.27 
   2  -6  28    0.21    0.08 
   2  -6  28    0.27    0.10 
   2   6  28    0.22    0.08 
   2  -6  26    0.51    0.10 
   2  -6  26    0.56    0.11 
   2   6  26    0.42    0.09 
   2  -6  24    1.20    0.13 
   2  -6  24    1.10    0.13 
   2   6  24    1.50    0.13 
   2  -6  22    3.97    0.20 
   2  -6  22    3.79    0.19 
   2   6  22    3.82    0.18 
   2  -6  20    0.13    0.06 
   2  -6  20    0.06    0.07 
   2   6  20    0.12    0.06 
   2  -6  18    6.48    0.22 
   2   6  18    6.63    0.23 
   2  -6  16    2.73    0.14 
   2   6  16    2.71    0.15 
   2  -6  14    0.83    0.09 
   2   6  14    0.59    0.08 
   2  -6  12   10.28    0.25 
   2   6  12    9.62    0.26 
  -2  -6 -10    0.16    0.03 
   2  -6  10    0.30    0.06 
   2   6  10    0.17    0.05 
   2  -6   8    0.16    0.04 
  -2  -6  -8    0.25    0.04 
   2   6   8    0.19    0.05 
  -2   6  -8    0.33    0.04 
   2  -6   6    4.17    0.13 
  -2  -6  -6    4.37    0.13 
   2  -6   6    4.08    0.16 
   2   6   6    4.28    0.15 
  -2   6  -6    4.60    0.12 
   2  -6   4    2.83    0.10 
   2  -6   4    3.00    0.14 
   2   6   4    2.79    0.12 
  -2   6  -4    2.89    0.10 
   2  -6   2    0.01    0.03 
   2  -6   2    0.02    0.03 
  -2   6  -2    0.03    0.03 
   2   6   2   -0.08    0.03 
   2  -6   0   17.05    0.34 
   2  -6   0   17.43    0.30 
   2   6   0   17.59    0.32 
  -2   6   0   17.67    0.32 
   2  -6  -2   11.90    0.26 
   2   6  -2   11.45    0.23 
  -2   6   2   12.15    0.25 
   2  -6  -4    0.82    0.08 
  -2  -6   4    0.86    0.07 
  -2   6   4    0.87    0.07 
   2   6  -4    0.75    0.06 
   2  -6  -6   12.48    0.26 
  -2  -6   6   12.78    0.27 
  -2   6   6   13.07    0.28 
  -2  -6   8    6.60    0.14 
   2  -6  -8    6.61    0.17 
  -2  -6   8    7.01    0.19 
   2  -6 -10    0.32    0.05 
  -2  -6  10    0.52    0.07 
  -2   6  10    0.27    0.06 
  -2  -6  12    1.02    0.10 
   2  -6 -12    0.96    0.08 
  -2   6  12    0.88    0.09 
  -2  -6  14   28.22    0.52 
  -2   6  14   28.81    0.52 
  -2  -6  16    0.08    0.06 
  -2   6  16    0.05    0.05 
  -2  -6  18    0.58    0.09 
  -2   6  18    0.56    0.08 
  -2  -6  20   21.89    0.47 
  -2   6  20   22.02    0.46 
  -2  -6  22   -0.04    0.06 
  -2   6  22    0.09    0.05 
  -2   6  22    0.15    0.07 
  -2  -6  24    0.16    0.09 
  -2   6  24    0.09    0.06 
  -2   6  24    0.08    0.06 
  -2  -6  26    7.34    0.29 
  -2   6  26    7.13    0.25 
  -2   6  26    7.49    0.26 
  -2  -6  28    4.06    0.24 
  -2   6  28    3.71    0.26 
  -2   6  28    3.70    0.20 
  -2  -6  30    2.28    0.20 
  -2   6  30    2.41    0.17 
  -2  -6  32    7.22    0.33 
  -2   6  32    7.44    0.29 
  -2   6  34    1.58    0.16 
   2  -7  31    1.36    0.17 
   2  -7  31    1.56    0.16 
   2   7  31    1.56    0.16 
   2  -7  29   14.48    0.43 
   2  -7  29   14.62    0.44 
   2   7  29   14.34    0.41 
   2  -7  27    1.23    0.14 
   2  -7  27    1.40    0.16 
   2   7  27    1.47    0.15 
   2  -7  25   14.72    0.41 
   2  -7  25   14.95    0.42 
   2   7  25   14.70    0.39 
   2  -7  23   19.66    0.48 
   2  -7  23   18.52    0.46 
   2   7  23   19.37    0.45 
   2  -7  21    0.48    0.10 
   2  -7  21    0.48    0.10 
   2   7  21    0.50    0.09 
   2  -7  19   43.73    0.80 
   2  -7  19   43.26    0.76 
   2   7  19   45.07    0.78 
   2  -7  17   17.08    0.39 
   2  -7  17   16.91    0.42 
   2   7  17   16.87    0.39 
   2  -7  15   18.31    0.44 
   2  -7  15   17.87    0.39 
   2   7  15   18.77    0.41 
   2  -7  13   58.33    0.91 
   2  -7  13   59.29    0.97 
   2   7  13   59.54    0.94 
   2  -7  11    0.54    0.07 
   2  -7  11    0.56    0.08 
   2   7  11    0.52    0.08 
   2  -7   9   57.15    0.93 
   2  -7   9   58.58    0.87 
  -2  -7  -9   60.14    0.84 
   2   7   9   58.18    0.90 
  -2  -7  -7   28.26    0.47 
   2  -7   7   27.95    0.47 
   2  -7   7   28.46    0.54 
   2   7   7   27.27    0.50 
   2  -7   5   10.88    0.29 
   2  -7   5   10.89    0.24 
  -2  -7  -5   11.13    0.25 
  -2   7  -5   10.80    0.22 
   2   7   5   10.43    0.26 
   2  -7   3   64.85    0.98 
   2  -7   3   63.76    0.91 
  -2   7  -3   64.82    0.91 
   2   7   3   62.56    0.94 
   2  -7   1    3.86    0.13 
   2  -7   1    3.96    0.16 
   2   7   1    3.90    0.14 
  -2   7  -1    3.93    0.14 
   2  -7  -1   40.17    0.61 
   2  -7  -1   41.04    0.67 
  -2   7   1   41.66    0.64 
   2   7  -1   39.90    0.62 
  -2  -7   3   38.46    0.62 
   2  -7  -3   39.21    0.63 
   2   7  -3   38.69    0.59 
  -2   7   3   39.06    0.63 
  -2  -7   5    7.87    0.21 
   2  -7  -5    8.01    0.21 
  -2   7   5    7.79    0.22 
   2   7  -5    7.61    0.18 
  -2  -7   7   30.79    0.53 
   2  -7  -7   31.09    0.51 
  -2  -7   7   30.96    0.47 
  -2   7   7   30.66    0.54 
  -2  -7   9    5.95    0.19 
   2  -7  -9    6.34    0.18 
  -2   7   9    6.38    0.20 
  -2  -7  11   11.05    0.28 
   2  -7 -11   10.78    0.26 
  -2   7  11   11.10    0.29 
  -2  -7  13   10.06    0.27 
  -2   7  13   10.18    0.28 
  -2  -7  15   -0.01    0.05 
  -2   7  15    0.05    0.05 
  -2  -7  17    4.84    0.20 
  -2   7  17    4.91    0.20 
  -2  -7  19    0.71    0.10 
  -2   7  19    0.66    0.10 
  -2  -7  21    0.19    0.08 
  -2   7  21    0.13    0.07 
  -2  -7  23    0.04    0.06 
  -2   7  23   -0.10    0.06 
  -2  -7  25    0.60    0.12 
  -2   7  25    0.51    0.09 
  -2  -7  27    0.90    0.14 
  -2   7  27    0.84    0.12 
  -2  -7  29    0.80    0.14 
  -2   7  29    0.79    0.11 
  -2  -7  31    0.01    0.10 
  -2   7  31    0.00    0.07 
  -2  -7  33    2.47    0.21 
   2  -8  30    9.85    0.38 
   2  -8  28    0.34    0.10 
   2  -8  28    0.34    0.11 
   2   8  28    0.51    0.11 
   2  -8  26    1.41    0.16 
   2  -8  26    1.29    0.15 
   2   8  26    1.50    0.16 
   2  -8  24    1.85    0.18 
   2  -8  24    1.66    0.17 
   2   8  24    1.49    0.15 
   2  -8  22    6.87    0.29 
   2  -8  22    6.92    0.27 
   2   8  22    6.84    0.27 
   2  -8  20    2.00    0.16 
   2  -8  20    1.94    0.17 
   2   8  20    1.82    0.15 
   2  -8  18    2.50    0.16 
   2  -8  18    2.21    0.18 
   2   8  18    2.41    0.16 
   2  -8  16    4.79    0.20 
   2  -8  16    4.38    0.22 
   2   8  16    4.72    0.21 
   2  -8  14    0.03    0.06 
   2  -8  14    0.03    0.05 
   2   8  14   -0.04    0.05 
   2  -8  12    3.33    0.19 
   2  -8  12    3.43    0.16 
   2   8  12    3.50    0.17 
   2  -8  10    0.85    0.09 
   2  -8  10    0.83    0.11 
   2   8  10    1.04    0.11 
   2  -8   8   -0.02    0.04 
   2  -8   8    0.05    0.06 
   2   8   8    0.06    0.05 
   2  -8   6    3.52    0.17 
  -2  -8  -6    3.89    0.15 
   2  -8   6    3.21    0.13 
   2   8   6    3.40    0.16 
   2  -8   4    2.53    0.12 
  -2  -8  -4    2.26    0.13 
   2  -8   4    2.46    0.15 
  -2   8  -4    2.72    0.12 
   2   8   4    2.18    0.13 
   2  -8   2    1.87    0.13 
  -2  -8  -2    1.90    0.12 
   2  -8   2    1.83    0.10 
  -2   8  -2    1.97    0.11 
   2   8   2    1.93    0.11 
   2  -8   0   22.81    0.46 
   2  -8   0   22.59    0.40 
   2   8   0   22.60    0.42 
  -2   8   0   22.47    0.42 
   2  -8  -2    3.57    0.13 
   2  -8  -2    3.36    0.16 
  -2  -8   2    3.48    0.14 
   2   8  -2    3.15    0.13 
  -2   8   2    3.27    0.14 
   2  -8  -4    9.89    0.27 
  -2  -8   4   10.00    0.25 
  -2   8   4   10.13    0.26 
   2   8  -4    9.94    0.23 
   2  -8  -6   23.44    0.44 
  -2  -8   6   23.61    0.45 
  -2   8   6   22.79    0.45 
   2  -8  -8    7.89    0.22 
  -2  -8   8    7.50    0.23 
  -2   8   8    7.64    0.24 
  -2  -8  10   11.89    0.30 
  -2   8  10   11.49    0.31 
  -2  -8  12    5.53    0.20 
  -2   8  12    5.29    0.21 
  -2  -8  14   37.92    0.67 
  -2   8  14   36.47    0.67 
  -2  -8  16   12.00    0.33 
  -2   8  16   12.10    0.34 
  -2  -8  18    0.39    0.09 
  -2   8  18    0.34    0.08 
  -2  -8  20   37.57    0.72 
  -2   8  20   37.60    0.71 
  -2  -8  22    3.82    0.22 
  -2   8  22    3.66    0.20 
  -2  -8  24    4.24    0.23 
  -2   8  24    4.13    0.22 
  -2  -8  26   20.65    0.53 
  -2   8  26   21.07    0.51 
  -2  -8  28    1.16    0.16 
  -2   8  28    1.15    0.14 
  -2  -8  30   13.07    0.62 
   2  -9  27    0.49    0.17 
   2  -9  25    1.01    0.14 
   2  -9  25    1.07    0.15 
   2   9  25    0.89    0.13 
   2  -9  23    4.07    0.24 
   2  -9  23    3.72    0.23 
   2   9  23    3.90    0.22 
   2  -9  21    0.25    0.10 
   2  -9  21    0.25    0.10 
   2   9  21    0.26    0.09 
   2  -9  19    3.50    0.23 
   2  -9  19    3.49    0.20 
   2   9  19    3.73    0.21 
   2  -9  17    2.93    0.18 
   2  -9  17    3.09    0.21 
   2   9  17    3.10    0.19 
   2  -9  15    3.32    0.21 
   2  -9  15    3.32    0.19 
   2   9  15    3.25    0.19 
   2  -9  13    7.50    0.32 
   2  -9  13    7.45    0.29 
   2   9  13    7.28    0.26 
   2  -9  11    0.08    0.07 
   2   9  11    0.24    0.07 
   2  -9   9    8.09    0.29 
   2   9   9    7.80    0.26 
   2  -9   7    2.44    0.17 
   2   9   7    2.75    0.15 
   2  -9   5    0.76    0.11 
  -2  -9  -5    0.81    0.09 
   2   9   5    0.90    0.10 
  -2  -9  -3    4.52    0.18 
   2  -9   3    4.27    0.20 
   2   9   3    4.27    0.17 
  -2  -9  -1    0.11    0.05 
  -2  -9  -1    0.03    0.06 
   2  -9   1    0.09    0.07 
   2   9   1    0.06    0.05 
  -2   9  -1    0.09    0.05 
   2  -9  -1   10.36    0.30 
  -2  -9   1    9.85    0.26 
  -2  -9   1   10.41    0.30 
  -2   9   1   10.07    0.27 
   2   9  -1    9.94    0.25 
   2  -9  -3    3.83    0.18 
  -2  -9   3    3.38    0.16 
  -2   9   3    3.57    0.16 
  -2  -9   5    1.84    0.13 
   2  -9  -5    2.11    0.14 
  -2   9   5    2.01    0.13 
  -2  -9   7    2.42    0.14 
   2  -9  -7    2.62    0.15 
  -2   9   7    2.59    0.15 
  -2  -9   9   -0.01    0.05 
  -2   9   9   -0.03    0.05 
  -2  -9  11    0.98    0.11 
  -2   9  11    0.87    0.11 
  -2  -9  13    0.09    0.07 
  -2   9  13    0.34    0.08 
  -2  -9  15    1.17    0.13 
  -2   9  15    1.31    0.13 
  -2  -9  17    1.78    0.16 
  -2   9  17    1.79    0.15 
  -2  -9  19    0.04    0.07 
  -2   9  19   -0.04    0.06 
  -2  -9  21   -0.07    0.08 
  -2   9  21   -0.05    0.06 
  -2  -9  23    0.30    0.10 
  -2   9  23    0.33    0.10 
  -2  -9  25    0.56    0.12 
  -2   9  25    0.55    0.11 
  -2  -9  27    0.31    0.12 
   2 -10  20   -0.06    0.08 
   2  10  20    0.01    0.07 
   2 -10  18    0.03    0.08 
   2  10  18   -0.02    0.07 
   2 -10  16    0.23    0.10 
   2  10  16    0.33    0.10 
   2 -10  14    1.35    0.16 
   2  10  14    1.52    0.14 
   2 -10  12    1.13    0.14 
   2  10  12    1.43    0.14 
   2 -10  10    1.06    0.14 
   2  10  10    1.00    0.12 
   2 -10   8    0.03    0.07 
   2  10   8    0.02    0.06 
   2 -10   6   13.40    0.39 
   2  10   6   13.01    0.34 
   2 -10   4    1.72    0.17 
   2  10   4    1.96    0.14 
  -2 -10  -2    3.19    0.17 
   2 -10   2    3.14    0.19 
   2  10   2    3.07    0.16 
   2 -10   0   27.64    0.58 
  -2 -10   0   28.71    0.57 
   2 -10  -2    0.26    0.08 
  -2 -10   2    0.31    0.09 
  -2  10   2    0.39    0.07 
  -2 -10   4   30.23    0.57 
  -2 -10   4   31.21    0.63 
   2 -10  -4   29.66    0.58 
  -2  10   4   30.11    0.58 
  -2 -10   6   21.57    0.46 
  -2 -10   6   21.20    0.50 
  -2  10   6   21.63    0.47 
  -2 -10   8   13.71    0.35 
  -2 -10   8   13.83    0.40 
  -2  10   8   13.65    0.36 
  -2 -10  10   36.34    0.67 
  -2  10  10   37.37    0.70 
  -2 -10  12    2.72    0.18 
  -2  10  12    2.95    0.18 
  -2 -10  14   38.84    0.72 
  -2  10  14   38.80    0.74 
  -2 -10  16   19.92    0.48 
  -2  10  16   20.68    0.50 
  -2 -10  18    3.22    0.22 
  -2 -10  18    3.02    0.20 
  -2  10  18    3.26    0.20 
  -2 -10  20   47.48    0.87 
  -2 -10  20   45.11    0.91 
  -2  10  20   45.89    0.87 
  -2 -10  22    4.01    0.25 
  -2 -10  24   12.65    0.42 
   2  11  17    1.21    0.17 
   2 -11  15    0.22    0.11 
   2  11  15    0.16    0.08 
   2 -11  13    2.38    0.21 
   2  11  13    2.19    0.18 
   2 -11  11    0.23    0.11 
   2  11  11    0.44    0.10 
   2 -11   9    2.31    0.20 
   2  11   9    2.42    0.18 
   2 -11   7    3.29    0.22 
   2  11   7    2.92    0.18 
   2 -11   5    0.00    0.08 
   2  11   5    0.07    0.07 
   2 -11   3    2.01    0.18 
   2 -11   1    0.64    0.12 
  -2 -11  -1    0.68    0.11 
  -2 -11   1    0.18    0.08 
   2 -11  -1    0.13    0.08 
   2 -11  -3    0.79    0.17 
  -2 -11   3    0.90    0.13 
  -2 -11   5    0.02    0.07 
  -2  11   5    0.08    0.07 
  -2 -11   7    3.74    0.23 
  -2  11   7    3.40    0.19 
  -2 -11   9    2.67    0.20 
  -2  11   9    2.46    0.18 
  -2 -11  11    0.12    0.09 
  -2  11  11   -0.02    0.07 
  -2 -11  13    1.45    0.17 
  -2  11  13    1.80    0.16 
  -2 -11  15    1.16    0.16 
  -2  11  15    0.98    0.13 
  -2  11  17   -0.04    0.07 
   2  12  12   -0.01    0.11 
   2 -12  10   -0.16    0.12 
   2  12  10    0.06    0.07 
   2 -12   8   -0.04    0.09 
   2  12   8    0.09    0.08 
   2 -12   6    1.16    0.15 
   2 -12   4    0.51    0.12 
   2 -12   2    0.03    0.09 
   2 -12   0    5.23    0.26 
  -2 -12   2    0.06    0.09 
  -2 -12   4    5.55    0.27 
  -2 -12   6    6.61    0.30 
  -2 -12   8    2.18    0.20 
  -2  12   8    2.26    0.20 
  -2 -12  10    9.85    0.38 
  -2  12  10   10.02    0.34 
  -2  12  12    1.63    0.17 
   3   0  37   -0.03    0.08 
   3   0  35   -0.11    0.07 
   3   0  33    0.14    0.08 
   3   0  31    0.20    0.09 
   3   0  29    0.04    0.07 
   3   0  27    0.11    0.07 
   3   0  25   -0.06    0.05 
   3   0  23    0.09    0.06 
  -3   0 -23   -0.01    0.03 
  -3   0 -21    0.06    0.03 
   3   0  21    0.01    0.05 
   3   0  19    0.02    0.05 
   3   0  19    0.00    0.03 
  -3   0 -19    0.01    0.03 
  -3   0 -17    0.03    0.03 
   3   0  17    0.09    0.05 
   3   0  17    0.03    0.03 
  -3   0 -15    0.11    0.03 
   3   0  15    0.01    0.04 
   3   0  15    0.02    0.02 
  -3   0 -13    0.01    0.02 
   3   0  13    0.00    0.02 
   3   0  13   -0.05    0.03 
  -3   0 -11    0.01    0.02 
   3   0  11    0.00    0.02 
   3   0  11    0.00    0.03 
   3   0   9   -0.12    0.03 
   3   0   9   -0.03    0.02 
  -3   0  -9   -0.11    0.02 
  -3   0  -7    0.11    0.02 
   3   0   7    0.08    0.02 
   3   0   7    0.05    0.02 
   3   0   5    0.12    0.02 
  -3   0  -5    0.09    0.02 
   3   0   3   -0.57    0.02 
   3   0   3   -0.55    0.02 
  -3   0  -3   -0.54    0.02 
  -3   0  -1   -0.07    0.01 
  -3   0   1   -0.25    0.01 
  -3   0   3   -0.16    0.01 
  -3   0   3   -0.14    0.01 
  -3   0   5    0.01    0.01 
  -3   0   5    0.02    0.01 
  -3   0   7   -0.26    0.02 
  -3   0   7   -0.35    0.02 
  -3   0   9    0.04    0.03 
  -3   0   9    0.04    0.02 
  -3   0  11    0.19    0.02 
  -3   0  11   -0.02    0.03 
  -3   0  13    0.00    0.02 
  -3   0  13    0.00    0.03 
  -3   0  15    0.16    0.03 
  -3   0  15    0.08    0.04 
  -3   0  17    0.01    0.04 
  -3   0  17    0.06    0.02 
  -3   0  19    0.12    0.06 
  -3   0  19    0.06    0.03 
  -3   0  21    0.09    0.03 
  -3   0  21    0.05    0.06 
  -3   0  23    0.08    0.06 
  -3   0  23    0.04    0.03 
  -3   0  25    0.00    0.03 
  -3   0  25    0.06    0.06 
  -3   0  27    0.24    0.07 
  -3   0  29   -0.01    0.06 
  -3   0  31    0.01    0.07 
  -3   0  33    0.04    0.07 
  -3   0  35    0.07    0.09 
  -3   0  37    0.02    0.08 
   3  -1  36    5.19    0.28 
   3   1  36    5.33    0.28 
   3  -1  34    5.21    0.27 
   3   1  34    5.18    0.26 
   3  -1  32    0.51    0.12 
   3   1  32    0.22    0.09 
   3  -1  30   12.64    0.38 
   3   1  30   12.47    0.37 
   3  -1  28   28.17    0.60 
   3   1  28   29.38    0.60 
   3  -1  26    6.26    0.24 
  -3  -1 -26    6.18    0.19 
   3   1  26    5.99    0.23 
   3  -1  24    2.79    0.16 
   3   1  24    2.82    0.16 
   3  -1  22   85.21    1.27 
   3  -1  22   84.92    1.17 
   3   1  22   83.87    1.26 
   3   1  22   85.11    1.18 
   3  -1  20   13.44    0.27 
   3  -1  20   13.78    0.33 
   3   1  20   13.16    0.32 
  -3   1 -20   13.38    0.24 
   3   1  20   13.30    0.27 
   3  -1  18    0.68    0.08 
   3  -1  18    0.82    0.07 
   3   1  18    0.72    0.05 
  -3   1 -18    0.88    0.05 
   3   1  18    0.86    0.07 
   3   1  18    0.83    0.09 
   3  -1  16  222.96    3.04 
   3  -1  16  223.07    2.92 
   3   1  16  225.80    2.86 
   3   1  16  223.54    3.05 
   3   1  16  224.92    2.89 
  -3   1 -16  223.41    3.01 
   3  -1  14    3.23    0.13 
   3  -1  14    3.50    0.11 
  -3   1 -14    3.58    0.09 
   3   1  14    3.19    0.12 
   3   1  14    3.51    0.11 
   3   1  14    3.43    0.08 
   3  -1  12  109.12    1.42 
   3  -1  12  107.65    1.45 
   3   1  12  107.85    1.41 
   3   1  12  107.49    1.45 
   3   1  12  108.71    1.42 
  -3   1 -12  108.44    1.38 
   3  -1  10  318.71    4.39 
  -3   1 -10  320.68    4.22 
   3   1  10  326.99    4.13 
   3   1  10  326.08    4.39 
   3   1  10  324.14    4.50 
   3  -1   8   79.43    1.06 
   3  -1   8   78.75    1.05 
   3   1   8   80.04    1.04 
   3   1   8   79.29    1.05 
  -3   1  -8   81.07    1.06 
   3   1   8   79.57    1.07 
   3  -1   6  111.82    1.50 
   3  -1   6  114.23    1.65 
   3   1   6  113.35    1.66 
  -3   1  -6  114.27    1.55 
   3   1   6  114.08    1.58 
  -3  -1  -4  181.01    2.43 
   3  -1   4  183.07    2.51 
   3  -1   4  182.33    2.47 
  -3   1  -4  182.08    2.39 
   3  -1   2  597.77    9.12 
  -3  -1  -2  596.19   10.38 
   3  -1   2  598.01   10.89 
  -3   1  -2  579.82    9.46 
   3  -1   0  117.75    1.68 
  -3  -1   0  119.05    1.63 
   3  -1   0  117.50    1.50 
  -3   1   0  118.51    1.63 
  -3   1   0  115.91    1.50 
  -3  -1   2   41.31    0.55 
   3  -1  -2   42.87    0.56 
  -3   1   2   41.20    0.56 
  -3   1   2   41.96    0.55 
  -3  -1   4  994.87   16.26 
  -3  -1   4  985.38   14.33 
  -3   1   4 1000.00   14.75 
  -3   1   4  977.03   15.83 
  -3  -1   6    2.70    0.08 
  -3  -1   6    2.82    0.06 
  -3   1   6    2.74    0.07 
  -3   1   6    2.68    0.07 
  -3  -1   8   46.01    0.63 
  -3  -1   8   45.44    0.59 
  -3   1   8   44.32    0.62 
  -3   1   8   44.54    0.61 
  -3  -1  10  446.76    5.72 
  -3  -1  10  448.61    6.06 
  -3   1  10  447.19    6.00 
  -3   1  10  442.81    5.89 
  -3  -1  12    9.44    0.21 
  -3  -1  12    9.48    0.16 
  -3   1  12    9.09    0.20 
  -3   1  12    9.57    0.18 
  -3  -1  14   37.80    0.59 
  -3  -1  14   37.96    0.52 
  -3   1  14   38.05    0.59 
  -3   1  14   38.21    0.55 
  -3  -1  16  205.55    2.69 
  -3  -1  16  208.03    2.71 
  -3   1  16  203.08    2.70 
  -3   1  16  205.51    2.80 
  -3  -1  18   60.49    0.92 
  -3  -1  18   60.90    0.81 
  -3   1  18   61.02    0.85 
  -3   1  18   59.63    0.91 
  -3  -1  20   17.77    0.38 
  -3  -1  20   17.53    0.29 
  -3   1  20   17.42    0.37 
  -3   1  20   17.47    0.32 
  -3  -1  22   19.18    0.32 
  -3  -1  22   21.13    0.43 
  -3   1  22   18.54    0.41 
  -3   1  22   18.74    0.35 
  -3  -1  24   45.41    0.79 
  -3   1  24   47.63    0.71 
  -3   1  24   46.69    0.79 
  -3  -1  26    0.27    0.08 
  -3   1  26    0.04    0.06 
  -3   1  26    0.08    0.05 
  -3  -1  28    5.57    0.23 
  -3   1  28    5.35    0.23 
  -3   1  28    5.02    0.22 
  -3  -1  30   16.71    0.44 
  -3   1  30   15.93    0.43 
  -3  -1  32    1.07    0.14 
  -3   1  32    1.11    0.13 
  -3  -1  34    1.32    0.16 
  -3   1  34    1.39    0.16 
  -3  -1  36    3.15    0.23 
  -3   1  36    3.02    0.22 
  -3   1  38    2.02    0.19 
   3  -2  35    8.34    0.33 
   3   2  35    8.54    0.34 
   3  -2  33    6.14    0.29 
   3   2  33    5.95    0.27 
   3  -2  31    4.82    0.25 
   3   2  31    4.76    0.24 
   3  -2  29   26.22    0.58 
   3   2  29   26.75    0.58 
   3  -2  27    3.51    0.20 
   3   2  27    4.05    0.20 
   3  -2  25    6.91    0.26 
   3   2  25    7.15    0.21 
   3   2  25    7.05    0.25 
   3  -2  23   20.93    0.45 
   3  -2  23   20.42    0.39 
   3   2  23   20.29    0.39 
   3   2  23   20.16    0.44 
   3  -2  21    0.61    0.07 
   3  -2  21    0.53    0.08 
   3   2  21    0.60    0.07 
   3   2  21    0.55    0.08 
   3  -2  19   31.70    0.52 
   3  -2  19   31.40    0.56 
   3   2  19   30.38    0.55 
   3   2  19   31.83    0.52 
   3  -2  17    9.00    0.24 
   3  -2  17    8.18    0.21 
   3   2  17    8.66    0.20 
   3   2  17    8.32    0.23 
  -3   2 -17    8.45    0.15 
   3  -2  15    7.04    0.18 
   3  -2  15    6.97    0.20 
  -3   2 -15    6.97    0.12 
   3   2  15    6.81    0.19 
   3   2  15    6.98    0.17 
   3  -2  13   57.44    0.81 
   3  -2  13   57.88    0.83 
   3   2  13   57.09    0.81 
  -3   2 -13   56.71    0.74 
   3   2  13   55.43    0.83 
   3  -2  11    7.88    0.18 
   3  -2  11    7.88    0.19 
  -3   2 -11    8.34    0.13 
   3   2  11    8.20    0.18 
   3   2  11    8.26    0.19 
   3  -2   9    0.65    0.06 
   3  -2   9    0.65    0.05 
  -3   2  -9    0.68    0.03 
   3   2   9    0.74    0.05 
   3  -2   7    0.49    0.05 
   3  -2   7    0.62    0.05 
  -3   2  -7    0.53    0.03 
   3   2   7    0.51    0.05 
   3   2   7    0.49    0.04 
   3  -2   5    5.15    0.12 
   3  -2   5    5.42    0.11 
  -3   2  -5    5.29    0.09 
   3   2   5    5.24    0.12 
   3  -2   3    6.25    0.11 
   3  -2   3    6.29    0.14 
  -3   2  -3    6.15    0.11 
   3   2   3    6.32    0.13 
   3  -2   1    0.42    0.02 
   3  -2   1    0.34    0.03 
  -3   2  -1    0.38    0.03 
  -3  -2   1   18.94    0.27 
   3  -2  -1   18.25    0.29 
  -3   2   1   19.17    0.28 
   3  -2  -3    1.70    0.06 
  -3  -2   3    1.64    0.05 
  -3   2   3    1.60    0.06 
   3  -2  -5    0.77    0.05 
  -3  -2   5    0.77    0.05 
  -3  -2   5    0.72    0.03 
  -3   2   5    0.75    0.03 
  -3  -2   7   10.39    0.20 
  -3  -2   7   10.83    0.16 
  -3   2   7   10.86    0.18 
  -3   2   7   10.99    0.20 
  -3  -2   9    3.45    0.11 
  -3  -2   9    3.53    0.07 
  -3   2   9    3.73    0.10 
  -3   2   9    3.34    0.10 
  -3  -2  11    0.31    0.04 
  -3   2  11    0.39    0.04 
  -3   2  11    0.40    0.04 
  -3  -2  13    5.56    0.16 
  -3  -2  13    6.04    0.10 
  -3   2  13    5.84    0.16 
  -3   2  13    5.90    0.15 
  -3  -2  15    4.88    0.16 
  -3  -2  15    4.47    0.09 
  -3   2  15    4.47    0.15 
  -3   2  15    4.62    0.14 
  -3  -2  17   27.93    0.38 
  -3  -2  17   28.05    0.49 
  -3   2  17   26.80    0.45 
  -3   2  17   27.18    0.48 
  -3  -2  19   11.24    0.18 
  -3  -2  19   10.95    0.28 
  -3   2  19   11.07    0.24 
  -3   2  19   11.08    0.27 
  -3  -2  21   12.67    0.32 
  -3   2  21   12.56    0.31 
  -3   2  21   13.02    0.28 
  -3  -2  23   33.67    0.62 
  -3   2  23   32.50    0.55 
  -3   2  23   32.04    0.59 
  -3  -2  25    1.70    0.14 
  -3   2  25    1.66    0.11 
  -3   2  25    1.68    0.14 
  -3  -2  27   18.48    0.45 
  -3   2  27   17.82    0.37 
  -3   2  27   17.81    0.43 
  -3  -2  29    9.84    0.33 
  -3   2  29   10.08    0.26 
  -3   2  29   10.15    0.31 
  -3  -2  31    2.44    0.19 
  -3   2  31    2.60    0.18 
  -3  -2  33   18.04    0.49 
  -3   2  33   19.53    0.49 
  -3  -2  35    1.84    0.19 
  -3   2  35    2.01    0.19 
  -3  -2  37    6.08    0.31 
  -3   2  37    5.87    0.28 
   3  -3  36    4.37    0.27 
   3   3  36    4.69    0.26 
   3  -3  34    2.43    0.21 
   3   3  34    2.69    0.21 
   3  -3  32    0.23    0.10 
   3   3  32    0.24    0.10 
   3  -3  30   10.75    0.35 
   3   3  30   11.54    0.36 
   3  -3  28    6.02    0.25 
   3   3  28    6.16    0.25 
   3   3  28    5.97    0.21 
   3  -3  26    0.02    0.06 
   3  -3  26    0.09    0.05 
   3   3  26    0.03    0.05 
   3   3  26    0.06    0.05 
   3  -3  24    4.90    0.18 
   3  -3  24    4.40    0.20 
   3   3  24    4.30    0.17 
   3   3  24    4.10    0.19 
   3  -3  22   36.58    0.62 
   3  -3  22   37.44    0.67 
   3   3  22   36.84    0.66 
   3   3  22   36.62    0.62 
   3  -3  20    0.18    0.05 
   3  -3  20    0.26    0.07 
   3   3  20    0.16    0.05 
   3   3  20    0.06    0.05 
   3  -3  18    0.44    0.06 
   3  -3  18    0.43    0.08 
   3   3  18    0.35    0.06 
   3   3  18    0.43    0.07 
   3  -3  16   81.83    1.18 
   3   3  16   80.99    1.17 
   3   3  16   82.89    1.15 
   3  -3  14   12.88    0.28 
   3   3  14   12.84    0.27 
   3   3  14   12.91    0.28 
   3  -3  12   23.77    0.41 
   3   3  12   24.08    0.41 
   3   3  12   24.46    0.41 
  -3   3 -12   23.33    0.31 
   3  -3  10  116.46    1.56 
   3   3  10  122.18    1.58 
  -3   3 -10  118.53    1.51 
   3   3  10  115.67    1.57 
   3  -3   8   61.81    0.86 
   3  -3   8   63.66    0.89 
   3   3   8   63.98    0.88 
  -3   3  -8   62.59    0.81 
   3  -3   6   52.39    0.71 
   3  -3   6   50.56    0.74 
   3   3   6   51.72    0.73 
  -3   3  -6   52.14    0.67 
   3  -3   4  114.80    1.46 
   3  -3   4  113.70    1.50 
  -3   3  -4  112.89    1.58 
   3   3   4  114.13    1.48 
   3  -3   2  192.71    2.56 
   3  -3   2  191.24    2.66 
  -3   3  -2  192.82    2.57 
   3   3   2  188.37    2.54 
   3  -3   0   48.00    0.67 
   3  -3   0   48.15    0.62 
  -3   3   0   47.96    0.65 
   3   3   0   47.32    0.65 
  -3  -3   2   37.19    0.51 
   3  -3  -2   37.49    0.54 
  -3   3   2   37.56    0.53 
  -3  -3   4  178.64    2.47 
  -3  -3   4  175.65    2.34 
   3  -3  -4  176.54    2.49 
  -3   3   4  177.42    2.48 
   3  -3  -6    2.43    0.08 
  -3  -3   6    2.52    0.06 
  -3  -3   6    2.57    0.09 
  -3   3   6    2.47    0.07 
  -3   3   6    2.52    0.09 
   3  -3  -8    1.22    0.06 
  -3  -3   8    1.17    0.07 
  -3  -3   8    1.20    0.04 
  -3   3   8    1.12    0.06 
  -3   3   8    1.58    0.06 
  -3  -3  10  139.10    1.84 
  -3  -3  10  140.75    1.78 
  -3   3  10  140.83    1.86 
  -3   3  10  139.36    1.83 
  -3  -3  12   12.59    0.27 
  -3   3  12   12.65    0.25 
  -3   3  12   12.96    0.25 
  -3   3  14    0.77    0.07 
  -3   3  14    0.66    0.06 
  -3  -3  16   59.30    0.90 
  -3   3  16   60.63    0.88 
  -3   3  16   60.00    0.88 
  -3  -3  18   50.72    0.80 
  -3   3  18   50.91    0.77 
  -3   3  18   50.13    0.78 
  -3  -3  20    1.81    0.13 
  -3   3  20    1.60    0.10 
  -3   3  20    1.74    0.11 
  -3  -3  22    8.43    0.27 
  -3   3  22    8.71    0.25 
  -3   3  22    8.99    0.24 
  -3  -3  24   27.67    0.55 
  -3   3  24   25.51    0.48 
  -3   3  24   26.82    0.52 
  -3  -3  26    0.07    0.07 
  -3   3  26    0.00    0.05 
  -3   3  26    0.23    0.07 
  -3  -3  28    5.72    0.25 
  -3   3  28    5.80    0.21 
  -3   3  28    5.38    0.23 
  -3  -3  30    6.71    0.28 
  -3   3  30    6.98    0.27 
  -3   3  30    6.73    0.23 
  -3  -3  32    0.94    0.14 
  -3   3  32    0.81    0.10 
  -3   3  32    0.95    0.13 
  -3  -3  34    1.61    0.18 
  -3   3  34    1.31    0.15 
  -3  -3  36    3.23    0.24 
  -3   3  36    2.90    0.21 
   3  -4  35   23.80    0.61 
   3   4  35   25.23    0.61 
   3  -4  33   11.52    0.39 
   3   4  33   11.79    0.38 
   3  -4  31   10.65    0.37 
   3   4  31   10.49    0.35 
   3  -4  29   43.00    0.82 
   3   4  29   42.93    0.75 
   3   4  29   43.26    0.81 
   3  -4  27    0.50    0.10 
   3  -4  27    0.53    0.09 
   3   4  27    0.52    0.10 
   3   4  27    0.47    0.09 
   3  -4  25   24.81    0.50 
   3  -4  25   24.35    0.53 
   3   4  25   24.19    0.52 
   3   4  25   25.64    0.50 
   3  -4  23   28.47    0.54 
   3  -4  23   28.84    0.57 
   3   4  23   29.08    0.56 
   3   4  23   28.42    0.53 
   3  -4  21    7.15    0.23 
   3  -4  21    7.37    0.25 
   3   4  21    6.96    0.23 
   3   4  21    7.42    0.22 
   3  -4  19   42.73    0.71 
   3  -4  19   44.07    0.73 
   3   4  19   42.07    0.71 
   3   4  19   43.23    0.70 
   3  -4  17    4.50    0.18 
   3  -4  17    4.78    0.18 
   3   4  17    4.62    0.17 
   3   4  17    4.73    0.17 
   3  -4  15   37.55    0.62 
   3   4  15   36.98    0.61 
   3   4  15   37.74    0.62 
   3  -4  13   40.66    0.65 
   3   4  13   41.96    0.65 
   3   4  13   41.96    0.65 
   3  -4  11    0.24    0.05 
  -3  -4 -11    0.28    0.03 
  -3   4 -11    0.19    0.02 
   3   4  11    0.22    0.05 
   3  -4   9    7.12    0.19 
   3  -4   9    7.11    0.17 
  -3   4  -9    7.05    0.12 
   3   4   9    7.35    0.18 
   3  -4   7    3.96    0.14 
   3  -4   7    3.99    0.12 
  -3   4  -7    4.00    0.09 
   3   4   7    3.87    0.12 
   3  -4   5    0.52    0.05 
   3  -4   5    0.42    0.05 
  -3   4  -5    0.54    0.04 
   3   4   5    0.47    0.05 
   3  -4   3    4.89    0.14 
   3  -4   3    4.87    0.11 
   3   4   3    5.06    0.13 
  -3   4  -3    4.85    0.11 
   3  -4   1   -0.10    0.02 
   3  -4   1   -0.05    0.03 
  -3   4  -1   -0.03    0.02 
   3   4   1   -0.10    0.02 
   3  -4  -1    1.14    0.07 
   3   4  -1    1.13    0.06 
  -3   4   1    1.07    0.06 
   3  -4  -3   13.13    0.24 
  -3   4   3   13.02    0.24 
   3  -4  -5    4.58    0.12 
  -3  -4   5    4.51    0.13 
  -3  -4   5    4.54    0.10 
  -3   4   5    4.89    0.13 
  -3  -4   7   60.80    0.86 
  -3  -4   7   60.00    0.79 
   3  -4  -7   60.43    0.83 
  -3   4   7   60.68    0.86 
   3  -4  -9   10.48    0.20 
  -3  -4   9   10.43    0.16 
  -3  -4   9   10.58    0.23 
  -3   4   9   10.25    0.23 
   3  -4 -11   37.80    0.53 
  -3  -4  11   38.02    0.48 
  -3  -4  11   38.15    0.59 
  -3   4  11   36.68    0.55 
  -3   4  11   36.77    0.59 
  -3  -4  13   38.98    0.63 
  -3   4  13   39.46    0.59 
  -3   4  13   38.77    0.62 
  -3  -4  15    0.85    0.09 
  -3   4  15    0.96    0.07 
  -3   4  15    0.88    0.08 
  -3  -4  17   51.42    0.80 
  -3   4  17   50.38    0.77 
  -3   4  17   49.05    0.78 
  -3  -4  19    9.20    0.26 
  -3   4  19    9.02    0.24 
  -3   4  19    8.97    0.24 
  -3  -4  21   36.63    0.66 
  -3   4  21   36.62    0.63 
  -3   4  21   36.66    0.62 
  -3  -4  23   56.76    0.93 
  -3   4  23   55.93    0.88 
  -3   4  23   55.16    0.89 
  -3  -4  25    0.37    0.09 
  -3   4  25    0.45    0.09 
  -3   4  25    0.52    0.08 
  -3  -4  27   57.16    0.99 
  -3   4  27   57.03    0.92 
  -3   4  27   57.28    0.95 
  -3  -4  29   18.61    0.48 
  -3   4  29   18.49    0.42 
  -3   4  29   18.00    0.44 
  -3  -4  31   11.15    0.37 
  -3   4  31   11.50    0.32 
  -3   4  31   11.55    0.35 
  -3  -4  33   38.55    0.80 
  -3   4  33   38.39    0.76 
  -3   4  33   38.15    0.71 
  -3  -4  35    1.29    0.18 
  -3   4  35    1.46    0.16 
  -3   4  37   20.75    0.54 
  -3  -5 -34    1.00    0.15 
   3  -5  34    0.97    0.15 
   3   5  34    1.34    0.16 
   3  -5  32    3.35    0.22 
   3   5  32    3.44    0.22 
   3  -5  30    3.50    0.23 
   3   5  30    3.34    0.21 
   3   5  30    3.57    0.19 
   3  -5  28    0.70    0.11 
   3  -5  28    0.87    0.11 
   3   5  28    0.73    0.10 
   3   5  28    0.83    0.12 
   3  -5  26    2.04    0.17 
   3  -5  26    1.85    0.15 
   3   5  26    1.68    0.14 
   3   5  26    2.07    0.16 
   3  -5  24    3.90    0.19 
   3  -5  24    3.41    0.20 
   3   5  24    4.03    0.19 
   3   5  24    3.78    0.18 
   3  -5  22    4.45    0.21 
   3  -5  22    4.83    0.20 
   3   5  22    5.00    0.20 
   3   5  22    4.86    0.19 
   3  -5  20    1.63    0.13 
   3  -5  20    1.90    0.14 
   3   5  20    1.64    0.12 
   3   5  20    1.90    0.13 
   3  -5  18    5.95    0.21 
   3  -5  18    5.70    0.21 
   3   5  18    5.72    0.20 
   3  -5  16    5.43    0.20 
   3  -5  16    5.46    0.19 
   3   5  16    5.41    0.19 
   3  -5  14    4.25    0.16 
   3  -5  14    4.40    0.18 
   3   5  14    4.63    0.17 
   3  -5  12    4.75    0.18 
   3  -5  12    4.91    0.16 
  -3  -5 -12    4.55    0.13 
   3   5  12    4.66    0.16 
  -3  -5 -10   11.20    0.19 
   3  -5  10   11.00    0.24 
   3  -5  10   11.00    0.27 
  -3   5 -10   11.05    0.18 
   3   5  10   11.19    0.26 
   3  -5   8    1.88    0.09 
   3  -5   8    1.98    0.12 
  -3   5  -8    1.98    0.07 
   3  -5   6   14.25    0.26 
   3  -5   6   13.99    0.30 
  -3   5  -6   13.86    0.24 
   3  -5   4    4.47    0.12 
   3  -5   4    4.32    0.15 
   3   5   4    4.38    0.14 
  -3   5  -4    4.47    0.12 
   3  -5   2   22.52    0.34 
   3  -5   2   22.12    0.40 
  -3   5  -2   22.26    0.36 
   3   5   2   21.78    0.37 
   3  -5   0    3.04    0.09 
   3  -5   0    3.12    0.12 
   3   5   0    2.98    0.10 
  -3   5   0    3.05    0.10 
   3  -5  -2    3.64    0.13 
  -3   5   2    3.66    0.12 
   3   5  -2    3.89    0.11 
   3  -5  -4    6.47    0.17 
  -3  -5   4    6.68    0.17 
  -3   5   4    6.63    0.17 
   3  -5  -6   11.90    0.24 
  -3  -5   6   12.08    0.25 
  -3  -5   6   11.97    0.21 
  -3   5   6   12.37    0.26 
  -3  -5   8    4.07    0.09 
   3  -5  -8    4.04    0.12 
  -3  -5   8    3.96    0.14 
  -3   5   8    3.68    0.14 
  -3  -5  10    8.43    0.14 
  -3  -5  10    8.38    0.21 
   3  -5 -10    8.70    0.19 
  -3   5  10    8.00    0.21 
   3  -5 -12    6.69    0.16 
  -3  -5  12    6.62    0.19 
  -3   5  12    6.32    0.19 
  -3  -5  14    2.66    0.13 
  -3   5  14    2.76    0.11 
  -3   5  14    2.73    0.13 
  -3  -5  16    8.36    0.24 
  -3   5  16    8.73    0.24 
  -3   5  16    8.89    0.22 
  -3  -5  18    5.75    0.21 
  -3   5  18    5.62    0.18 
  -3   5  18    5.29    0.19 
  -3  -5  20    6.42    0.23 
  -3   5  20    6.10    0.20 
  -3   5  20    6.10    0.21 
  -3  -5  22    1.01    0.12 
  -3   5  22    0.91    0.10 
  -3   5  22    1.17    0.11 
  -3  -5  24    2.07    0.15 
  -3   5  24    1.88    0.13 
  -3   5  24    1.87    0.13 
  -3  -5  26    7.00    0.28 
  -3   5  26    7.07    0.24 
  -3   5  26    7.00    0.24 
  -3  -5  28    1.91    0.18 
  -3   5  28    2.07    0.15 
  -3   5  28    1.75    0.14 
  -3  -5  30    1.58    0.17 
  -3   5  30    1.66    0.15 
  -3   5  30    1.65    0.15 
  -3  -5  32    3.43    0.24 
  -3   5  32    3.47    0.21 
  -3   5  32    3.31    0.19 
  -3  -5  34    0.48    0.12 
  -3   5  34    0.67    0.11 
   3  -6  33   10.18    0.38 
   3  -6  31    9.28    0.35 
   3   6  31    9.00    0.31 
   3  -6  29   34.14    0.70 
   3  -6  29   33.73    0.71 
   3   6  29   35.23    0.68 
   3  -6  27    0.64    0.11 
   3  -6  27    0.81    0.12 
   3   6  27    0.59    0.10 
   3  -6  25   21.36    0.50 
   3  -6  25   21.53    0.50 
   3   6  25   21.55    0.48 
   3  -6  23   20.30    0.47 
   3  -6  23   20.34    0.47 
   3   6  23   21.02    0.46 
   3  -6  21    1.24    0.13 
   3  -6  21    1.14    0.12 
   3   6  21    1.41    0.13 
   3  -6  19   23.77    0.51 
   3  -6  19   23.76    0.49 
   3   6  19   24.02    0.49 
   3  -6  17    1.17    0.12 
   3  -6  17    1.29    0.12 
   3   6  17    1.12    0.11 
   3  -6  15   22.90    0.44 
   3  -6  15   22.81    0.48 
   3   6  15   22.34    0.45 
   3  -6  13   10.90    0.26 
   3  -6  13   10.50    0.29 
   3   6  13   10.70    0.27 
   3  -6  11    4.45    0.15 
   3  -6  11    4.32    0.18 
   3   6  11    4.09    0.16 
  -3  -6  -9   10.30    0.20 
   3  -6   9   10.24    0.23 
   3  -6   9   10.14    0.27 
   3   6   9   10.02    0.25 
   3  -6   7    1.06    0.07 
   3  -6   7    0.81    0.09 
   3   6   7    0.96    0.08 
  -3   6  -7    0.97    0.06 
   3  -6   5    1.18    0.09 
   3  -6   5    1.46    0.08 
  -3   6  -5    1.78    0.08 
   3   6   5    1.27    0.09 
   3  -6   3    0.10    0.05 
   3  -6   3    0.03    0.03 
   3   6   3   -0.04    0.03 
  -3   6  -3    0.04    0.03 
   3  -6   1    0.21    0.05 
   3  -6   1    0.22    0.04 
   3   6   1    0.04    0.03 
  -3   6  -1    0.09    0.03 
   3  -6  -1    0.17    0.05 
   3  -6  -1    0.22    0.03 
   3   6  -1    0.20    0.04 
  -3   6   1    0.17    0.04 
   3  -6  -3    1.03    0.09 
  -3  -6   3    1.04    0.08 
   3   6  -3    1.01    0.07 
  -3   6   3    1.11    0.08 
  -3  -6   5    7.04    0.16 
   3  -6  -5    6.83    0.19 
  -3  -6   5    6.96    0.19 
  -3   6   5    7.12    0.19 
   3  -6  -7   36.30    0.57 
  -3  -6   7   36.51    0.59 
  -3  -6   7   35.89    0.52 
  -3   6   7   36.25    0.59 
  -3  -6   9    1.05    0.08 
  -3  -6   9    1.09    0.06 
   3  -6  -9    1.03    0.08 
  -3   6   9    1.11    0.09 
  -3  -6  11   51.37    0.80 
   3  -6 -11   52.76    0.75 
  -3   6  11   51.25    0.81 
  -3  -6  13   42.58    0.70 
   3  -6 -13   41.89    0.64 
  -3   6  13   41.82    0.69 
  -3  -6  15    0.51    0.07 
  -3   6  15    0.57    0.08 
  -3  -6  17   44.10    0.75 
  -3   6  17   43.11    0.73 
  -3  -6  19   16.94    0.40 
  -3   6  19   16.98    0.39 
  -3  -6  21   22.18    0.49 
  -3   6  21   22.71    0.47 
  -3   6  21   22.50    0.45 
  -3  -6  23   49.35    0.87 
  -3   6  23   48.56    0.81 
  -3   6  23   49.29    0.84 
  -3  -6  25    0.37    0.09 
  -3   6  25    0.28    0.08 
  -3  -6  27   34.79    0.71 
  -3   6  27   35.01    0.67 
  -3  -6  29   12.75    0.41 
  -3   6  29   13.78    0.38 
  -3  -6  31    5.72    0.29 
  -3   6  31    5.55    0.25 
  -3  -6  33   20.36    0.63 
  -3   6  33   21.09    0.51 
   3  -7  32    7.56    0.50 
   3  -7  30    0.11    0.10 
   3  -7  30    0.05    0.08 
   3   7  30    0.20    0.09 
   3  -7  28    0.29    0.10 
   3  -7  28    0.31    0.10 
   3   7  28    0.06    0.08 
   3  -7  26    6.60    0.28 
   3  -7  26    6.52    0.28 
   3   7  26    6.92    0.27 
   3  -7  24    3.03    0.20 
   3  -7  24    3.03    0.20 
   3   7  24    3.12    0.19 
   3  -7  22    3.45    0.19 
   3  -7  22    3.01    0.19 
   3   7  22    3.02    0.17 
   3  -7  20   11.17    0.34 
   3  -7  20   11.78    0.33 
   3   7  20   11.85    0.33 
   3  -7  18    9.63    0.31 
   3  -7  18   10.24    0.29 
   3   7  18   10.06    0.30 
   3  -7  16    7.49    0.27 
   3  -7  16    7.09    0.23 
   3   7  16    6.94    0.24 
   3  -7  14    6.82    0.25 
   3  -7  14    7.05    0.22 
   3   7  14    7.00    0.23 
   3  -7  12   26.00    0.47 
   3  -7  12   26.00    0.53 
   3   7  12   24.99    0.49 
   3  -7  10    0.31    0.07 
   3  -7  10    0.28    0.06 
   3   7  10    0.22    0.06 
   3  -7   8    4.81    0.20 
  -3  -7  -8    4.83    0.15 
   3  -7   8    4.84    0.16 
   3   7   8    4.77    0.18 
   3  -7   6   86.50    1.20 
   3  -7   6   88.40    1.29 
  -3   7  -6   87.85    1.18 
   3   7   6   86.68    1.25 
   3  -7   4    0.32    0.05 
   3  -7   4    0.29    0.07 
  -3   7  -4    0.36    0.05 
   3   7   4    0.25    0.05 
   3  -7   2    2.21    0.13 
   3  -7   2    2.10    0.10 
  -3   7  -2    2.33    0.11 
   3   7   2    2.30    0.12 
   3  -7   0   48.32    0.77 
   3  -7   0   48.08    0.70 
  -3   7   0   48.81    0.73 
   3   7   0   48.84    0.73 
   3  -7  -2   12.79    0.30 
   3  -7  -2   12.68    0.25 
  -3  -7   2   12.93    0.28 
  -3   7   2   13.04    0.28 
   3   7  -2   12.85    0.26 
  -3  -7   4   22.90    0.42 
   3  -7  -4   22.85    0.43 
  -3   7   4   22.65    0.42 
  -3  -7   6   35.20    0.53 
   3  -7  -6   35.81    0.58 
  -3  -7   6   35.39    0.59 
  -3   7   6   35.15    0.60 
   3  -7  -8   37.08    0.59 
  -3  -7   8   35.70    0.63 
  -3  -7   8   37.43    0.62 
  -3   7   8   36.66    0.63 
  -3  -7  10   26.20    0.49 
   3  -7 -10   26.72    0.45 
  -3   7  10   25.39    0.49 
  -3  -7  12   16.73    0.37 
  -3   7  12   16.38    0.37 
  -3  -7  14   12.63    0.32 
  -3   7  14   11.91    0.31 
  -3  -7  16    1.24    0.12 
  -3   7  16    1.07    0.11 
  -3  -7  18    1.08    0.12 
  -3   7  18    1.02    0.11 
  -3  -7  20   16.47    0.41 
  -3   7  20   17.27    0.41 
  -3  -7  22    0.09    0.07 
  -3   7  22    0.04    0.06 
  -3  -7  24    0.07    0.08 
  -3   7  24   -0.02    0.06 
  -3  -7  26   10.38    0.35 
  -3   7  26   10.37    0.33 
  -3  -7  28    0.86    0.14 
  -3   7  28    0.74    0.11 
  -3  -7  30    0.46    0.12 
  -3   7  30    0.30    0.09 
   3  -8  29   13.07    0.42 
   3  -8  29   11.89    0.41 
   3  -8  27    0.25    0.10 
   3  -8  27    0.19    0.10 
   3   8  27    0.11    0.08 
   3  -8  25    5.96    0.27 
   3  -8  25    6.57    0.29 
   3   8  25    6.67    0.28 
   3  -8  23    7.23    0.29 
   3  -8  23    7.14    0.30 
   3   8  23    7.28    0.28 
   3  -8  21    0.62    0.11 
   3  -8  21    0.64    0.11 
   3   8  21    0.70    0.11 
   3  -8  19   11.76    0.34 
   3  -8  19   12.12    0.37 
   3   8  19   11.95    0.35 
   3  -8  17    1.48    0.13 
   3  -8  17    1.52    0.15 
   3   8  17    1.70    0.14 
   3  -8  15    9.20    0.31 
   3  -8  15    9.19    0.27 
   3   8  15    8.96    0.28 
   3  -8  13    6.96    0.22 
   3  -8  13    6.50    0.25 
   3   8  13    6.74    0.24 
   3  -8  11   -0.06    0.05 
   3  -8  11    0.01    0.05 
   3   8  11   -0.05    0.05 
   3  -8   9    2.01    0.11 
   3  -8   9    1.78    0.14 
   3   8   9    1.78    0.13 
   3  -8   7    0.04    0.04 
   3  -8   7    0.16    0.07 
  -3  -8  -7    0.01    0.04 
   3   8   7   -0.02    0.04 
   3  -8   5    0.93    0.08 
  -3  -8  -5    0.77    0.08 
   3  -8   5    0.62    0.09 
   3   8   5    0.64    0.08 
   3  -8   3    0.32    0.05 
   3  -8   3    0.43    0.07 
  -3   8  -3    0.26    0.05 
   3   8   3    0.22    0.06 
   3  -8   1    1.81    0.13 
   3  -8   1    1.99    0.14 
  -3   8  -1    1.75    0.11 
   3   8   1    1.91    0.11 
   3  -8  -1    0.88    0.10 
  -3  -8   1    0.93    0.09 
  -3   8   1    0.90    0.08 
   3   8  -1    0.93    0.08 
  -3  -8   3    1.31    0.10 
   3  -8  -3    1.21    0.11 
  -3   8   3    1.37    0.10 
   3  -8  -5    0.19    0.06 
  -3  -8   5    0.29    0.05 
  -3  -8   5    0.29    0.06 
  -3   8   5    0.23    0.06 
  -3  -8   7    5.51    0.19 
   3  -8  -7    5.41    0.19 
  -3   8   7    5.37    0.20 
  -3  -8   9    5.11    0.19 
   3  -8  -9    4.95    0.18 
  -3   8   9    4.91    0.19 
  -3  -8  11    1.30    0.11 
  -3   8  11    0.98    0.11 
  -3  -8  13    3.63    0.17 
  -3   8  13    3.44    0.17 
  -3  -8  15    0.00    0.06 
  -3   8  15   -0.06    0.05 
  -3  -8  17    6.41    0.24 
  -3   8  17    6.64    0.25 
  -3  -8  19    2.79    0.18 
  -3   8  19    3.26    0.19 
  -3  -8  21    4.40    0.22 
  -3   8  21    4.40    0.22 
  -3  -8  23   18.92    0.48 
  -3   8  23   18.74    0.47 
  -3  -8  25    0.16    0.09 
  -3   8  25    0.18    0.09 
  -3  -8  27    9.74    0.36 
  -3   8  27    9.37    0.33 
  -3  -8  29    5.56    0.29 
   3  -9  24    1.62    0.17 
   3   9  24    1.81    0.16 
   3  -9  22    9.01    0.35 
   3   9  22    8.79    0.31 
   3  -9  20    8.70    0.34 
   3   9  20    8.71    0.31 
   3  -9  18   15.79    0.45 
   3   9  18   15.08    0.41 
   3  -9  16   27.15    0.61 
   3   9  16   27.14    0.57 
   3  -9  14    3.70    0.22 
   3   9  14    3.61    0.19 
   3  -9  12   46.50    0.85 
   3   9  12   45.00    0.80 
   3  -9  10   23.24    0.53 
   3   9  10   22.51    0.48 
   3  -9   8    7.25    0.27 
   3   9   8    7.47    0.25 
   3  -9   6   88.84    1.36 
   3   9   6   87.36    1.30 
   3  -9   4   12.44    0.35 
  -3  -9  -4   11.91    0.30 
   3   9   4   12.34    0.31 
  -3  -9  -2   15.29    0.36 
   3  -9   2   15.05    0.38 
   3   9   2   15.00    0.34 
   3  -9   0   53.87    0.89 
  -3  -9   0   53.19    0.85 
   3   9   0   54.02    0.83 
  -3   9   0   52.98    0.83 
   3  -9  -2    2.58    0.15 
  -3  -9   2    2.54    0.14 
  -3   9   2    2.76    0.14 
   3  -9  -4   37.59    0.66 
  -3  -9   4   37.89    0.66 
  -3   9   4   38.25    0.66 
  -3  -9   6   18.88    0.41 
   3  -9  -6   18.79    0.41 
  -3   9   6   18.95    0.41 
  -3  -9   8   29.86    0.56 
  -3   9   8   28.45    0.56 
  -3  -9  10   33.19    0.61 
  -3   9  10   32.49    0.62 
  -3  -9  12    0.32    0.08 
  -3   9  12    0.45    0.09 
  -3  -9  14   29.60    0.59 
  -3   9  14   30.03    0.60 
  -3  -9  16    5.23    0.23 
  -3   9  16    5.78    0.24 
  -3  -9  18    2.06    0.16 
  -3   9  18    1.90    0.16 
  -3  -9  20   28.50    0.61 
  -3   9  20   27.43    0.60 
  -3  -9  22    0.66    0.12 
  -3   9  22    0.59    0.11 
  -3  -9  24    2.87    0.21 
  -3   9  24    2.73    0.19 
  -3  -9  26   10.09    0.37 
   3 -10  21   -0.07    0.08 
   3  10  21    0.00    0.09 
   3 -10  19   -0.08    0.08 
   3  10  19    0.05    0.08 
   3 -10  17    0.37    0.11 
   3  10  17    0.57    0.11 
   3 -10  15    1.58    0.17 
   3  10  15    1.34    0.15 
   3 -10  13    0.00    0.08 
   3  10  13   -0.02    0.07 
   3 -10  11    0.80    0.13 
   3  10  11    0.82    0.12 
   3 -10   9    0.07    0.08 
   3  10   9    0.09    0.07 
   3 -10   7    0.44    0.11 
   3  10   7    0.47    0.09 
   3 -10   5    0.74    0.12 
   3  10   5    0.75    0.10 
  -3 -10  -3    0.15    0.06 
   3 -10   3    0.00    0.07 
   3  10   3    0.02    0.06 
   3 -10   1    0.81    0.11 
  -3 -10  -1    0.87    0.10 
  -3 -10  -1    1.00    0.11 
   3  10   1    0.69    0.10 
  -3 -10   1    1.24    0.11 
  -3 -10   1    1.09    0.12 
   3 -10  -1    0.93    0.12 
  -3 -10   3    0.13    0.06 
   3 -10  -3   -0.03    0.06 
  -3 -10   3   -0.04    0.06 
  -3  10   3   -0.08    0.05 
   3 -10  -5    0.23    0.08 
  -3 -10   5    0.31    0.07 
  -3  10   5    0.32    0.08 
  -3 -10   7    0.50    0.09 
  -3  10   7    0.37    0.08 
  -3 -10   9    1.14    0.12 
  -3  10   9    0.79    0.11 
  -3 -10  11    0.19    0.08 
  -3  10  11    0.07    0.07 
  -3 -10  13    0.25    0.09 
  -3  10  13    0.31    0.09 
  -3 -10  15    0.45    0.10 
  -3  10  15    0.38    0.10 
  -3 -10  17    0.04    0.08 
  -3  10  17    0.13    0.08 
  -3 -10  19    0.42    0.11 
  -3  10  19    0.71    0.12 
  -3 -10  21    0.18    0.10 
  -3  10  21    0.19    0.09 
  -3 -10  23    1.62    0.18 
   3  11  16   15.49    0.44 
   3 -11  14    2.93    0.23 
   3  11  14    3.07    0.20 
   3 -11  12   19.22    0.53 
   3  11  12   19.30    0.48 
   3 -11  10   12.82    0.42 
   3  11  10   12.60    0.37 
   3 -11   8    2.87    0.21 
   3  11   8    3.11    0.19 
   3 -11   6   37.17    0.76 
   3  11   6   36.96    0.70 
   3 -11   4    3.43    0.22 
   3 -11   2   16.37    0.44 
   3 -11   0   34.15    0.69 
  -3 -11   0   34.14    0.67 
  -3 -11   2    2.01    0.18 
   3 -11  -2    1.42    0.14 
  -3 -11   4   33.25    0.68 
  -3 -11   6   15.11    0.43 
  -3  11   6   14.99    0.39 
  -3 -11   8   14.21    0.42 
  -3  11   8   13.71    0.38 
  -3 -11  10   21.81    0.55 
  -3  11  10   22.46    0.52 
  -3 -11  12    0.58    0.12 
  -3  11  12    0.52    0.10 
  -3 -11  14   19.75    0.54 
  -3  11  14   21.18    0.52 
  -3 -11  16    5.52    0.29 
  -3  11  16    6.07    0.27 
   3 -12   9    0.27    0.11 
   3 -12   7    1.07    0.15 
   3 -12   5    0.34    0.11 
   3 -12   3    1.37    0.16 
   3 -12   1    1.21    0.15 
  -3 -12   3    0.36    0.11 
  -3 -12   5    0.87    0.14 
  -3 -12   7    0.09    0.09 
  -3 -12   9    0.20    0.10 
  -3  12   9    0.21    0.09 
  -3  12  11    0.74    0.13 
   4   0  36   27.58    0.65 
   4   0  34   28.84    0.65 
   4   0  32   25.44    0.59 
   4   0  30   10.63    0.35 
   4   0  28  107.40    1.61 
   4   0  26   16.72    0.42 
   4   0  24    2.71    0.16 
   4   0  22  203.45    2.75 
  -4   0 -22  205.97    2.64 
   4   0  20    1.62    0.12 
  -4   0 -20    1.33    0.08 
   4   0  20    1.43    0.07 
   4   0  18   39.68    0.66 
   4   0  18   38.80    0.57 
  -4   0 -18   39.33    0.58 
  -4   0 -16  316.60    4.18 
   4   0  16  318.27    4.21 
   4   0  14   28.78    0.42 
  -4   0 -14   28.40    0.43 
   4   0  14   27.95    0.48 
  -4   0 -12   23.18    0.35 
   4   0  12   22.44    0.39 
   4   0  12   22.42    0.34 
   4   0  10  162.27    2.19 
   4   0  10  160.21    2.75 
  -4   0 -10  165.99    2.23 
   4   0   8   99.94    1.33 
  -4   0  -8  100.33    1.30 
   4   0   8  102.43    1.33 
   4   0   6   20.06    0.29 
   4   0   6   19.83    0.31 
  -4   0  -6   19.90    0.29 
   4   0   4   44.24    0.61 
   4   0   4   45.64    0.60 
  -4   0  -4   45.67    0.60 
  -4   0  -2  262.82    3.45 
   4   0   2  256.69    3.48 
   4   0   2  266.04    3.46 
  -4   0   0   29.31    0.40 
  -4   0   2   22.01    0.31 
  -4   0   4    2.48    0.06 
  -4   0   4    2.37    0.06 
  -4   0   6   86.74    1.10 
  -4   0   6   84.18    1.11 
  -4   0   8   80.04    1.09 
  -4   0   8   82.50    1.07 
  -4   0  10    3.68    0.11 
  -4   0  10    3.51    0.09 
  -4   0  12    0.88    0.05 
  -4   0  14   58.12    0.79 
  -4   0  14   58.69    0.84 
  -4   0  16    7.16    0.20 
  -4   0  16    7.19    0.16 
  -4   0  18    1.58    0.07 
  -4   0  18    1.42    0.10 
  -4   0  20   88.39    1.19 
  -4   0  20   88.39    1.28 
  -4   0  22   11.40    0.23 
  -4   0  22   11.66    0.30 
  -4   0  24   14.02    0.27 
  -4   0  24   13.47    0.34 
  -4   0  26   48.04    0.83 
  -4   0  28   44.77    0.81 
  -4   0  30   15.33    0.41 
  -4   0  32    5.09    0.25 
  -4   0  34   45.18    0.87 
  -4   0  36    5.77    0.29 
  -4   0  38    0.50    0.14 
   4  -1  35    0.82    0.14 
   4   1  35    1.14    0.16 
   4  -1  33   -0.03    0.08 
   4   1  33    0.09    0.08 
   4  -1  31    0.50    0.11 
   4   1  31    0.22    0.09 
   4  -1  29    0.10    0.08 
   4   1  29    0.07    0.07 
   4  -1  27    0.10    0.08 
   4   1  27    0.23    0.08 
   4  -1  25    0.04    0.06 
  -4  -1 -25    0.10    0.04 
   4   1  25    0.05    0.07 
  -4  -1 -23    0.22    0.05 
   4  -1  23    0.32    0.08 
   4   1  23    0.25    0.07 
  -4  -1 -21    1.34    0.08 
   4  -1  21    0.97    0.10 
   4  -1  21    1.31    0.09 
   4   1  21    1.30    0.12 
  -4   1 -21    1.34    0.08 
   4  -1  19    6.55    0.17 
   4  -1  19    6.73    0.21 
   4   1  19    6.62    0.21 
  -4   1 -19    6.59    0.15 
   4  -1  17    0.30    0.06 
   4  -1  17    0.28    0.04 
  -4   1 -17    0.33    0.04 
   4   1  17    0.33    0.03 
   4   1  17    0.32    0.06 
   4  -1  15    9.06    0.19 
   4  -1  15    9.41    0.23 
  -4   1 -15    9.24    0.17 
   4   1  15    9.09    0.16 
   4   1  15    8.85    0.23 
   4  -1  13   36.41    0.53 
   4  -1  13   35.69    0.57 
   4   1  13   34.59    0.56 
  -4   1 -13   36.28    0.50 
   4   1  13   36.62    0.48 
   4  -1  11    0.03    0.03 
   4  -1  11    0.04    0.02 
   4   1  11    0.03    0.02 
  -4   1 -11    0.07    0.02 
   4   1  11    0.03    0.03 
   4  -1   9   17.80    0.29 
   4  -1   9   18.01    0.31 
  -4  -1  -9   17.85    0.29 
   4   1   9   18.08    0.31 
  -4   1  -9   17.99    0.27 
   4   1   9   18.17    0.26 
   4  -1   7   19.48    0.30 
   4  -1   7   19.49    0.31 
  -4  -1  -7   18.46    0.30 
  -4   1  -7   19.29    0.28 
   4   1   7   19.25    0.31 
   4  -1   5   13.24    0.23 
  -4  -1  -5   14.59    0.23 
   4  -1   5   14.34    0.23 
  -4   1  -5   14.26    0.21 
   4  -1   3   36.29    0.52 
   4  -1   3   38.48    0.50 
  -4  -1  -3   37.19    0.51 
  -4   1  -3   37.93    0.50 
   4  -1   1    5.93    0.09 
  -4  -1  -1    5.78    0.11 
  -4   1  -1    5.86    0.11 
  -4  -1   1   14.65    0.22 
   4  -1  -1   15.18    0.24 
  -4   1   1   15.14    0.23 
  -4  -1   3   12.11    0.19 
  -4   1   3   12.05    0.20 
  -4   1   3   12.30    0.17 
  -4  -1   5    9.80    0.18 
  -4  -1   5    9.99    0.16 
  -4   1   5   10.18    0.16 
  -4  -1   7   23.06    0.35 
  -4  -1   7   22.56    0.31 
  -4   1   7   22.41    0.33 
  -4   1   7   21.10    0.33 
  -4  -1   9    1.12    0.05 
  -4  -1   9    1.06    0.06 
  -4   1   9    0.95    0.06 
  -4   1   9    1.04    0.06 
  -4  -1  11   56.31    0.80 
  -4  -1  11   56.95    0.74 
  -4   1  11   56.29    0.77 
  -4   1  11   55.84    0.79 
  -4  -1  13   20.69    0.31 
  -4  -1  13   20.68    0.37 
  -4   1  13   21.56    0.36 
  -4   1  13   20.48    0.34 
  -4  -1  15    0.12    0.03 
  -4  -1  15    0.06    0.04 
  -4   1  15    0.05    0.04 
  -4   1  15    0.05    0.03 
  -4  -1  17   24.76    0.37 
  -4   1  17   24.87    0.40 
  -4   1  17   24.61    0.44 
  -4  -1  19    2.05    0.13 
  -4  -1  19    2.29    0.08 
  -4   1  19    2.27    0.10 
  -4  -1  21    3.57    0.11 
  -4  -1  21    3.38    0.16 
  -4   1  21    3.55    0.16 
  -4   1  21    3.40    0.12 
  -4  -1  23    8.96    0.27 
  -4   1  23    8.75    0.26 
  -4   1  23    8.77    0.21 
  -4  -1  25    0.26    0.08 
  -4   1  25    0.15    0.07 
  -4   1  25    0.10    0.05 
  -4  -1  27    4.38    0.21 
  -4   1  27    4.58    0.21 
  -4   1  27    4.57    0.16 
  -4  -1  29    2.47    0.17 
  -4   1  29    2.21    0.16 
  -4  -1  31    0.17    0.09 
  -4   1  31    0.17    0.08 
  -4  -1  33    0.83    0.13 
  -4   1  33    1.01    0.13 
  -4  -1  35    0.07    0.10 
  -4   1  35    0.10    0.09 
  -4  -1  37    0.44    0.12 
  -4   1  37    0.74    0.13 
   4  -2  36   28.43    0.67 
   4   2  36   29.31    0.68 
   4  -2  34   12.96    0.42 
   4   2  34   12.96    0.41 
   4  -2  32   15.34    0.44 
   4   2  32   14.95    0.43 
   4  -2  30   19.65    0.49 
   4   2  30   20.26    0.50 
  -4  -2 -28   56.98    0.89 
   4  -2  28   58.02    0.99 
   4   2  28   56.51    0.98 
   4  -2  26   20.89    0.48 
  -4  -2 -26   21.03    0.42 
   4   2  26   20.69    0.48 
   4  -2  24   12.66    0.34 
   4  -2  24   12.65    0.29 
   4   2  24   12.54    0.34 
   4  -2  22  100.59    1.49 
   4  -2  22  102.93    1.42 
   4   2  22  102.81    1.42 
   4   2  22  101.84    1.48 
   4  -2  20    0.51    0.08 
   4  -2  20    0.48    0.06 
   4   2  20    0.69    0.09 
   4   2  20    0.36    0.06 
   4  -2  18   17.36    0.37 
   4  -2  18   17.27    0.33 
   4   2  18   17.69    0.33 
   4   2  18   17.05    0.37 
  -4   2 -18   17.48    0.29 
   4  -2  16  212.00    2.75 
   4  -2  16  207.63    2.71 
   4   2  16  212.93    2.75 
   4   2  16  209.84    2.80 
  -4   2 -16  204.77    2.71 
   4  -2  14   12.24    0.27 
   4  -2  14   11.99    0.25 
  -4   2 -14   12.19    0.20 
   4   2  14   12.42    0.25 
   4   2  14   11.78    0.26 
   4  -2  12   76.46    1.07 
   4  -2  12   77.65    1.05 
   4   2  12   77.48    1.05 
   4   2  12   74.82    1.07 
  -4   2 -12   75.43    0.98 
   4  -2  10  140.03    1.79 
   4  -2  10  134.60    1.86 
   4   2  10  135.60    1.79 
  -4   2 -10  134.53    1.78 
   4   2  10  135.53    1.77 
   4  -2   8   43.69    0.63 
   4  -2   8   44.70    0.63 
  -4   2  -8   43.68    0.58 
   4   2   8   42.92    0.63 
   4   2   8   44.71    0.63 
   4  -2   6   36.11    0.52 
   4  -2   6   36.25    0.54 
   4   2   6   37.65    0.53 
  -4   2  -6   36.97    0.49 
   4  -2   4   12.70    0.23 
   4  -2   4   12.16    0.20 
  -4   2  -4   12.30    0.19 
   4  -2   2  265.70    3.70 
   4  -2   2  259.09    4.23 
  -4  -2  -2  266.38    3.61 
  -4   2  -2  265.40    3.52 
   4  -2   0  181.11    2.36 
   4  -2   0  181.62    2.52 
  -4  -2   0  180.16    2.47 
  -4   2   0  180.47    4.51 
  -4  -2   2    0.08    0.02 
   4  -2  -2    0.17    0.03 
  -4   2   2    0.23    0.03 
  -4  -2   4   53.91    0.70 
  -4  -2   4   54.83    0.74 
   4  -2  -4   55.31    0.73 
  -4   2   4   51.74    0.73 
  -4   2   4   54.16    0.71 
  -4  -2   6   16.22    0.27 
  -4  -2   6   16.17    0.23 
   4  -2  -6   15.85    0.26 
  -4   2   6   15.89    0.24 
  -4   2   6   16.13    0.27 
  -4  -2   8    4.23    0.12 
  -4  -2   8    4.45    0.08 
  -4   2   8    4.32    0.10 
  -4   2   8    4.31    0.11 
  -4  -2  10    6.35    0.16 
  -4  -2  10    6.12    0.11 
  -4   2  10    6.00    0.14 
  -4   2  10    6.13    0.14 
  -4  -2  12    8.94    0.14 
  -4  -2  12    8.94    0.21 
  -4   2  12    9.00    0.19 
  -4   2  12    8.85    0.19 
  -4  -2  14    0.97    0.04 
  -4   2  14    1.01    0.07 
  -4   2  14    0.94    0.07 
  -4  -2  16    1.15    0.05 
  -4  -2  16    1.26    0.09 
  -4   2  16    1.21    0.08 
  -4   2  16    1.23    0.09 
  -4  -2  18    2.23    0.07 
  -4  -2  18    2.10    0.12 
  -4   2  18    2.15    0.12 
  -4   2  18    2.22    0.10 
  -4  -2  20   28.20    0.53 
  -4   2  20   27.94    0.51 
  -4   2  20   28.73    0.48 
  -4  -2  22    0.43    0.08 
  -4   2  22    0.47    0.06 
  -4   2  22    0.35    0.07 
  -4  -2  24    2.02    0.15 
  -4   2  24    2.13    0.12 
  -4   2  24    2.24    0.15 
  -4  -2  26   46.35    0.82 
  -4   2  26   45.48    0.79 
  -4   2  26   45.83    0.73 
  -4  -2  28   14.77    0.40 
  -4   2  28   14.72    0.38 
  -4   2  28   14.48    0.33 
  -4  -2  30    4.82    0.24 
  -4   2  30    5.00    0.19 
  -4   2  30    4.91    0.23 
  -4  -2  32    8.12    0.32 
  -4   2  32    8.74    0.31 
  -4  -2  34   25.39    0.61 
  -4   2  34   24.15    0.57 
  -4  -2  36    5.94    0.30 
  -4   2  36    5.88    0.28 
  -4   2  38    3.22    0.23 
   4  -3  35    0.98    0.15 
   4   3  35    1.49    0.17 
   4  -3  33    1.79    0.19 
   4   3  33    2.13    0.18 
   4  -3  31    0.05    0.08 
   4   3  31    0.00    0.08 
   4  -3  29    0.05    0.07 
  -4  -3 -29    0.09    0.05 
   4   3  29   -0.01    0.07 
   4  -3  27    0.11    0.08 
   4   3  27    0.09    0.07 
   4  -3  25    0.28    0.09 
   4  -3  25    0.17    0.06 
   4   3  25    0.27    0.08 
   4   3  25    0.22    0.06 
   4  -3  23    0.25    0.07 
   4  -3  23    0.19    0.06 
   4   3  23    0.20    0.07 
   4   3  23    0.17    0.05 
   4  -3  21    3.62    0.15 
   4  -3  21    3.69    0.17 
   4   3  21    3.76    0.17 
   4   3  21    3.51    0.15 
   4  -3  19    8.39    0.25 
   4  -3  19    8.81    0.23 
   4   3  19    8.55    0.25 
   4   3  19    8.51    0.23 
   4  -3  17    0.14    0.04 
   4  -3  17    0.14    0.05 
   4   3  17    0.25    0.06 
   4   3  17    0.17    0.05 
   4  -3  15   17.49    0.34 
   4  -3  15   17.49    0.35 
   4   3  15   17.72    0.35 
   4   3  15   17.20    0.33 
  -4   3 -15   16.85    0.26 
   4  -3  13   29.36    0.49 
   4  -3  13   29.68    0.49 
   4   3  13   29.38    0.48 
   4   3  13   30.18    0.50 
  -4   3 -13   28.91    0.39 
   4  -3  11    2.39    0.10 
   4  -3  11    2.35    0.11 
   4   3  11    2.36    0.10 
  -4   3 -11    2.33    0.06 
   4   3  11    2.31    0.10 
   4  -3   9   52.74    0.77 
   4  -3   9   53.54    0.75 
   4   3   9   53.12    0.76 
  -4   3  -9   51.69    0.69 
   4  -3   7    6.01    0.14 
   4  -3   7    6.14    0.16 
   4   3   7    6.06    0.15 
  -4   3  -7    6.03    0.11 
   4  -3   5   85.22    1.17 
   4  -3   5   87.46    1.13 
  -4   3  -5   84.84    1.11 
   4   3   5   88.66    1.16 
   4  -3   3  102.35    1.32 
   4  -3   3  104.99    1.37 
  -4   3  -3  101.44    1.33 
   4   3   3  104.30    1.35 
   4  -3   1    0.20    0.02 
   4  -3   1    0.14    0.03 
  -4   3  -1    0.26    0.03 
  -4  -3   1  133.06    1.76 
   4  -3  -1  131.19    1.70 
   4  -3  -1  132.51    1.85 
  -4   3   1  129.63    1.69 
   4  -3  -3   67.77    0.91 
  -4  -3   3   68.19    0.89 
  -4   3   3   67.32    0.91 
  -4  -3   5   52.58    0.69 
  -4  -3   5   53.12    0.73 
   4  -3  -5   52.25    0.72 
  -4   3   5   50.59    0.72 
  -4  -3   7  159.94    2.09 
  -4  -3   7  167.10    2.25 
   4  -3  -7  157.51    2.23 
  -4   3   7  158.41    2.17 
  -4   3   7  159.71    2.23 
  -4  -3   9    0.50    0.03 
  -4  -3   9    0.38    0.05 
  -4   3   9    0.39    0.04 
  -4   3   9    0.30    0.04 
  -4  -3  11  131.23    1.69 
  -4  -3  11  135.96    1.75 
  -4   3  11  130.12    1.74 
  -4   3  11  129.32    1.77 
  -4  -3  13   93.57    1.30 
  -4  -3  13   93.82    1.18 
  -4   3  13   96.48    1.27 
  -4   3  13   92.04    1.28 
  -4  -3  15    6.71    0.10 
  -4  -3  15    6.75    0.20 
  -4   3  15    6.53    0.18 
  -4   3  15    6.75    0.18 
  -4  -3  17   94.02    1.34 
  -4   3  17   94.53    1.30 
  -4   3  17   93.34    1.30 
  -4  -3  19   12.96    0.32 
  -4   3  19   12.81    0.29 
  -4   3  19   13.08    0.30 
  -4  -3  21   36.08    0.64 
  -4   3  21   35.29    0.61 
  -4   3  21   36.02    0.60 
  -4  -3  23   43.15    0.75 
  -4   3  23   41.91    0.69 
  -4   3  23   42.91    0.72 
  -4  -3  25   -0.05    0.06 
  -4   3  25    0.10    0.05 
  -4   3  25    0.11    0.06 
  -4  -3  27   31.66    0.65 
  -4   3  27   32.15    0.62 
  -4   3  27   32.62    0.58 
  -4  -3  29    9.76    0.33 
  -4   3  29    9.45    0.27 
  -4   3  29    9.59    0.31 
  -4  -3  31    1.32    0.15 
  -4   3  31    1.58    0.15 
  -4   3  31    1.39    0.13 
  -4  -3  33    9.24    0.35 
  -4   3  33    8.73    0.32 
  -4  -3  35    0.42    0.12 
  -4   3  35    0.35    0.10 
  -4   3  37    2.52    0.21 
   4  -4  34    4.50    0.26 
   4   4  34    4.34    0.25 
  -4  -4 -32   -0.06    0.05 
   4  -4  32    0.04    0.09 
   4   4  32   -0.04    0.07 
   4  -4  30    3.13    0.22 
   4   4  30    3.52    0.21 
   4  -4  28   21.89    0.52 
   4   4  28   21.60    0.47 
   4   4  28   21.58    0.51 
   4  -4  26    0.56    0.09 
   4  -4  26    0.70    0.11 
   4   4  26    0.70    0.11 
   4   4  26    0.77    0.10 
   4  -4  24    6.72    0.23 
   4  -4  24    6.60    0.25 
   4   4  24    6.55    0.22 
   4   4  24    6.41    0.24 
   4  -4  22   21.79    0.45 
   4  -4  22   22.01    0.47 
   4   4  22   21.97    0.44 
   4   4  22   22.50    0.47 
   4  -4  20    1.17    0.12 
   4  -4  20    1.19    0.11 
   4   4  20    1.29    0.10 
   4   4  20    1.25    0.11 
   4  -4  18    0.20    0.06 
   4  -4  18    0.17    0.06 
   4   4  18    0.13    0.05 
   4   4  18    0.27    0.06 
   4  -4  16   52.49    0.83 
   4  -4  16   54.18    0.83 
   4   4  16   53.08    0.81 
   4   4  16   52.89    0.83 
   4  -4  14   12.44    0.28 
   4  -4  14   12.07    0.29 
   4   4  14   11.87    0.27 
   4   4  14   12.09    0.28 
   4  -4  12    0.46    0.06 
   4  -4  12    0.40    0.06 
  -4   4 -12    0.41    0.03 
   4   4  12    0.29    0.05 
   4  -4  10   32.51    0.54 
   4  -4  10   32.31    0.51 
   4   4  10   31.78    0.52 
  -4   4 -10   32.47    0.44 
   4  -4   8   11.11    0.22 
   4  -4   8   11.14    0.25 
   4   4   8   10.65    0.23 
  -4   4  -8   11.04    0.18 
   4  -4   6   12.33    0.22 
  -4   4  -6   11.96    0.20 
   4   4   6   12.31    0.25 
   4  -4   4    1.43    0.09 
   4   4   4    1.27    0.07 
  -4   4  -4    1.28    0.06 
   4  -4   2   80.79    1.11 
   4  -4   2   85.45    1.15 
  -4   4  -2   83.24    1.10 
   4   4   2   85.03    1.12 
   4  -4   0    0.47    0.03 
   4  -4   0    0.35    0.05 
  -4   4   0    0.43    0.04 
  -4  -4   2    8.67    0.17 
   4  -4  -2    8.68    0.19 
  -4   4   2    8.41    0.18 
  -4  -4   4   50.40    0.69 
  -4  -4   4   50.88    0.73 
   4  -4  -4   51.19    0.72 
  -4   4   4   50.19    0.72 
   4  -4  -6   34.51    0.51 
  -4  -4   6   33.85    0.48 
  -4  -4   6   34.20    0.53 
  -4   4   6   34.31    0.53 
  -4  -4   8   16.65    0.31 
  -4  -4   8   16.94    0.25 
   4  -4  -8   16.80    0.29 
  -4   4   8   16.70    0.31 
   4  -4 -10    4.70    0.13 
  -4  -4  10    4.80    0.09 
  -4  -4  10    4.97    0.15 
  -4   4  10    4.70    0.12 
  -4   4  10    4.81    0.15 
  -4  -4  12    9.74    0.23 
  -4  -4  12    9.60    0.14 
  -4   4  12    9.54    0.20 
  -4   4  12    9.71    0.23 
  -4  -4  14    9.44    0.24 
  -4   4  14    9.31    0.21 
  -4   4  14    9.14    0.23 
  -4  -4  16    3.44    0.15 
  -4   4  16    3.69    0.13 
  -4   4  16    3.47    0.14 
  -4  -4  18    2.47    0.14 
  -4   4  18    2.72    0.12 
  -4   4  18    2.58    0.13 
  -4  -4  20   15.33    0.36 
  -4   4  20   15.76    0.34 
  -4   4  20   15.79    0.34 
  -4  -4  22    0.77    0.10 
  -4   4  22    0.79    0.09 
  -4   4  22    0.74    0.09 
  -4  -4  24    0.04    0.06 
  -4   4  24    0.13    0.06 
  -4   4  24    0.14    0.06 
  -4  -4  26   25.70    0.56 
  -4   4  26   25.86    0.52 
  -4   4  26   26.16    0.51 
  -4  -4  28    5.66    0.26 
  -4   4  28    5.45    0.23 
  -4   4  28    5.20    0.21 
  -4  -4  30    0.05    0.09 
  -4   4  30    0.21    0.07 
  -4   4  30    0.15    0.07 
  -4  -4  32    2.50    0.21 
  -4   4  32    2.17    0.17 
  -4   4  32    2.01    0.15 
  -4  -4  34    6.54    0.30 
  -4   4  34    7.03    0.38 
  -4   4  34    6.83    0.28 
  -4   4  36   -0.07    0.07 
  -4  -5 -33    0.24    0.09 
   4  -5  33    0.29    0.11 
   4   5  33    0.22    0.09 
   4  -5  31    1.04    0.15 
   4   5  31    0.78    0.12 
   4  -5  29    0.11    0.09 
   4  -5  29   -0.01    0.07 
   4   5  29    0.03    0.07 
   4   5  29    0.17    0.08 
   4  -5  27    0.17    0.08 
   4  -5  27    0.29    0.08 
   4   5  27    0.28    0.08 
   4   5  27    0.22    0.08 
   4  -5  25    0.91    0.12 
   4  -5  25    0.93    0.11 
   4   5  25    0.98    0.12 
   4   5  25    0.93    0.11 
   4  -5  23    2.41    0.15 
   4  -5  23    2.46    0.16 
   4   5  23    2.39    0.14 
   4   5  23    2.45    0.16 
   4  -5  21    0.43    0.09 
   4  -5  21    0.45    0.08 
   4   5  21    0.34    0.07 
   4   5  21    0.45    0.08 
   4  -5  19   16.49    0.38 
   4  -5  19   16.22    0.38 
   4   5  19   16.82    0.37 
   4  -5  17    4.97    0.19 
   4  -5  17    5.02    0.19 
   4   5  17    4.90    0.18 
   4  -5  15   15.04    0.35 
   4  -5  15   15.80    0.34 
   4   5  15   15.48    0.34 
   4  -5  13   39.22    0.63 
   4  -5  13   39.35    0.66 
   4   5  13   39.13    0.64 
   4  -5  11    4.32    0.15 
  -4  -5 -11    4.40    0.10 
   4  -5  11    3.95    0.16 
   4   5  11    4.12    0.15 
   4  -5   9  102.09    1.40 
   4  -5   9  104.58    1.46 
   4   5   9  106.47    1.44 
  -4   5  -9  103.82    1.34 
   4  -5   7   31.32    0.53 
   4  -5   7   30.66    0.48 
  -4   5  -7   30.61    0.45 
   4   5   7   31.01    0.51 
   4  -5   5   74.81    1.08 
   4  -5   5   75.84    1.01 
  -4   5  -5   75.41    1.01 
   4   5   5   75.63    1.06 
   4  -5   3  149.15    1.98 
   4  -5   3  143.75    2.02 
  -4   5  -3  150.44    1.92 
   4   5   3  150.46    1.95 
   4  -5   1    0.07    0.04 
   4  -5   1    0.00    0.02 
  -4   5  -1    0.15    0.03 
   4   5   1    0.08    0.03 
   4  -5  -1  182.92    2.43 
   4  -5  -1  183.25    2.50 
  -4   5   1  187.38    2.47 
   4  -5  -3   94.23    1.30 
  -4  -5   3   97.49    1.27 
  -4   5   3   94.88    1.29 
   4  -5  -5   98.11    1.32 
  -4  -5   5   97.15    1.27 
  -4  -5   5   97.72    1.33 
  -4   5   5   95.87    1.32 
   4  -5  -7  250.22    3.20 
  -4  -5   7  256.39    5.47 
  -4  -5   7  250.97    3.25 
  -4   5   7  245.39    3.32 
   4  -5  -9    9.40    0.21 
  -4  -5   9    9.65    0.17 
  -4  -5   9    9.60    0.23 
  -4   5   9    9.20    0.23 
   4  -5 -11  139.19    1.79 
  -4  -5  11  134.77    1.84 
  -4  -5  11  136.76    1.72 
  -4   5  11  136.15    1.84 
  -4  -5  13   96.81    1.36 
  -4   5  13   96.31    1.36 
  -4  -5  15   13.06    0.31 
  -4   5  15   12.94    0.27 
  -4   5  15   13.45    0.31 
  -4  -5  17  122.86    1.71 
  -4   5  17  120.96    1.64 
  -4   5  17  120.41    1.69 
  -4  -5  19    9.48    0.28 
  -4   5  19    9.69    0.26 
  -4   5  19    9.20    0.24 
  -4  -5  21   45.47    0.79 
  -4   5  21   46.13    0.75 
  -4   5  21   47.09    0.77 
  -4  -5  23   51.31    0.88 
  -4   5  23   50.97    0.83 
  -4   5  23   51.65    0.85 
  -4  -5  25    1.07    0.13 
  -4   5  25    1.17    0.11 
  -4   5  25    1.16    0.11 
  -4  -5  27   30.18    0.64 
  -4   5  27   31.20    0.60 
  -4   5  27   30.36    0.59 
  -4  -5  29    5.78    0.27 
  -4   5  29    5.43    0.23 
  -4   5  29    5.65    0.23 
  -4  -5  31    6.94    0.30 
  -4   5  31    6.87    0.26 
  -4  -5  33   11.44    0.40 
  -4   5  33   10.70    0.34 
  -4   5  35    0.08    0.08 
  -4  -6 -34    0.28    0.13 
  -4  -6 -32    5.92    0.26 
   4  -6  32    6.00    0.29 
   4  -6  30    0.32    0.11 
   4  -6  30    0.15    0.09 
   4  -6  28    0.09    0.09 
   4  -6  28   -0.04    0.07 
   4   6  28   -0.03    0.07 
   4  -6  26    9.91    0.32 
   4  -6  26    9.91    0.33 
   4   6  26    9.60    0.31 
   4  -6  24    2.66    0.18 
   4  -6  24    2.45    0.17 
   4   6  24    2.60    0.17 
   4  -6  22    1.09    0.12 
   4  -6  22    0.93    0.12 
   4   6  22    0.74    0.10 
   4  -6  20    7.15    0.26 
   4  -6  20    7.27    0.25 
   4   6  20    7.40    0.25 
   4  -6  18    6.35    0.23 
   4  -6  18    6.16    0.22 
   4   6  18    6.13    0.22 
   4  -6  16    0.05    0.06 
   4  -6  16    0.10    0.06 
   4   6  16    0.03    0.05 
   4  -6  14    3.28    0.17 
   4  -6  14    3.47    0.15 
   4   6  14    3.61    0.16 
   4  -6  12   16.15    0.38 
   4  -6  12   16.83    0.34 
   4   6  12   15.98    0.35 
   4  -6  10    1.43    0.09 
   4  -6  10    1.25    0.12 
  -4  -6 -10    1.54    0.07 
   4   6  10    1.24    0.10 
   4  -6   8    1.49    0.09 
  -4   6  -8    1.46    0.07 
   4   6   8    1.54    0.10 
   4  -6   6   23.66    0.45 
   4  -6   6   22.96    0.38 
   4   6   6   23.42    0.42 
  -4   6  -6   23.05    0.37 
   4  -6   4    0.17    0.04 
   4  -6   4    0.19    0.05 
   4   6   4    0.16    0.05 
  -4   6  -4    0.21    0.04 
   4  -6   2    1.25    0.06 
   4  -6   2    1.17    0.09 
  -4   6  -2    1.34    0.08 
   4   6   2    1.28    0.08 
   4  -6   0    5.99    0.18 
   4  -6   0    5.64    0.13 
   4   6   0    5.92    0.16 
  -4   6   0    5.58    0.16 
   4  -6  -2    2.05    0.07 
   4  -6  -2    1.90    0.11 
  -4   6   2    1.97    0.10 
  -4  -6   4   -0.02    0.03 
  -4  -6   4    0.02    0.03 
   4  -6  -4    0.08    0.04 
  -4   6   4   -0.02    0.03 
   4  -6  -6   25.76    0.45 
  -4  -6   6   26.25    0.46 
  -4  -6   6   26.47    0.41 
  -4   6   6   26.18    0.46 
  -4  -6   8    0.33    0.04 
  -4  -6   8    0.39    0.06 
   4  -6  -8    0.38    0.06 
  -4   6   8    0.32    0.05 
  -4  -6  10    2.77    0.13 
  -4  -6  10    2.70    0.09 
   4  -6 -10    2.80    0.12 
  -4   6  10    2.69    0.13 
   4  -6 -12    1.78    0.10 
  -4  -6  12    1.78    0.12 
  -4   6  12    1.67    0.12 
  -4  -6  14    0.73    0.09 
  -4   6  14    0.65    0.08 
  -4  -6  16    2.12    0.14 
  -4   6  16    1.81    0.12 
  -4  -6  18    6.41    0.23 
  -4   6  18    6.10    0.22 
  -4  -6  20    0.04    0.06 
  -4   6  20    0.00    0.05 
  -4  -6  22    0.16    0.08 
  -4   6  22    0.07    0.06 
  -4  -6  24    6.29    0.26 
  -4   6  24    6.57    0.24 
  -4  -6  26    0.75    0.12 
  -4   6  26    0.58    0.10 
  -4  -6  28    0.20    0.09 
  -4   6  28    0.23    0.08 
  -4  -6  30    3.26    0.22 
  -4   6  30    3.42    0.20 
  -4  -6  32    0.88    0.15 
  -4   6  32    0.73    0.12 
  -4   6  34    0.34    0.10 
   4  -7  31    0.44    0.11 
   4  -7  31    0.49    0.13 
   4  -7  29    0.12    0.09 
   4  -7  29    0.18    0.10 
   4   7  29    0.07    0.09 
   4  -7  27   -0.01    0.08 
   4  -7  27   -0.02    0.07 
   4   7  27    0.09    0.08 
   4  -7  25    0.03    0.08 
   4  -7  25    0.00    0.08 
   4   7  25   -0.06    0.06 
   4  -7  23    0.07    0.08 
   4  -7  23    0.11    0.08 
   4   7  23    0.23    0.07 
   4  -7  21    0.33    0.08 
   4  -7  21    0.38    0.09 
   4   7  21    0.28    0.08 
   4  -7  19    3.16    0.18 
   4  -7  19    3.03    0.19 
   4   7  19    3.12    0.17 
   4  -7  17    0.77    0.11 
   4  -7  17    0.93    0.10 
   4   7  17    0.76    0.10 
   4  -7  15    5.70    0.23 
   4  -7  15    5.74    0.20 
   4   7  15    5.40    0.21 
   4  -7  13   10.39    0.31 
   4  -7  13   10.44    0.27 
   4   7  13   10.62    0.29 
   4  -7  11    0.67    0.10 
   4  -7  11    0.85    0.08 
   4   7  11    0.71    0.08 
   4  -7   9   31.29    0.52 
   4  -7   9   31.55    0.59 
   4   7   9   32.05    0.57 
   4  -7   7    5.92    0.22 
   4  -7   7    6.09    0.17 
   4   7   7    6.32    0.20 
   4  -7   5   24.58    0.49 
   4  -7   5   24.34    0.41 
  -4   7  -5   24.66    0.41 
   4   7   5   24.83    0.45 
   4  -7   3   59.61    0.93 
   4  -7   3   58.20    0.83 
  -4   7  -3   61.55    0.86 
   4   7   3   58.19    0.88 
   4  -7   1    0.25    0.04 
   4  -7   1    0.31    0.06 
   4   7   1    0.42    0.06 
  -4   7  -1    0.31    0.05 
   4  -7  -1   58.31    0.83 
   4  -7  -1   61.87    0.92 
   4   7  -1   59.53    0.87 
  -4   7   1   60.39    0.89 
   4  -7  -3   36.89    0.54 
  -4  -7   3   36.78    0.57 
  -4  -7   3   35.84    0.60 
   4  -7  -3   36.40    0.61 
  -4   7   3   36.86    0.60 
  -4  -7   5   17.61    0.37 
   4  -7  -5   18.83    0.37 
  -4  -7   5   17.92    0.32 
  -4   7   5   17.53    0.36 
  -4  -7   7   78.11    1.07 
  -4  -7   7   78.31    1.15 
   4  -7  -7   79.99    1.14 
  -4   7   7   80.74    1.16 
   4  -7  -9    1.87    0.11 
  -4  -7   9    1.62    0.12 
  -4   7   9    1.91    0.12 
  -4  -7  11   43.62    0.72 
   4  -7 -11   43.90    0.67 
  -4   7  11   42.76    0.73 
  -4  -7  13   38.56    0.67 
  -4   7  13   39.67    0.68 
  -4  -7  15    5.72    0.22 
  -4   7  15    5.42    0.21 
  -4  -7  17   45.11    0.78 
  -4   7  17   44.37    0.77 
  -4  -7  19    5.62    0.23 
  -4   7  19    5.22    0.21 
  -4  -7  21   20.71    0.48 
  -4   7  21   21.12    0.47 
  -4  -7  23   20.56    0.49 
  -4   7  23   21.58    0.49 
  -4  -7  25    0.62    0.12 
  -4   7  25    0.70    0.11 
  -4  -7  27   17.98    0.49 
  -4   7  27   18.41    0.46 
  -4  -7  29    3.26    0.22 
  -4   7  29    3.51    0.20 
  -4  -7  31    1.99    0.20 
  -4   7  31    2.13    0.18 
   4  -8  30    0.46    0.13 
   4  -8  28    6.79    0.31 
   4  -8  28    6.64    0.30 
   4   8  28    6.86    0.34 
   4  -8  26   27.27    0.64 
   4  -8  26   27.95    0.62 
   4   8  26   28.43    0.62 
   4  -8  24    1.95    0.18 
   4  -8  24    2.00    0.18 
   4   8  24    1.95    0.17 
   4  -8  22   20.38    0.52 
   4  -8  22   20.15    0.48 
   4   8  22   20.69    0.49 
   4  -8  20   17.40    0.46 
   4  -8  20   16.64    0.42 
   4   8  20   17.27    0.43 
   4  -8  18   14.71    0.37 
   4  -8  18   15.23    0.42 
   4   8  18   15.38    0.40 
   4  -8  16   19.83    0.48 
   4  -8  16   19.81    0.43 
   4   8  16   20.40    0.46 
   4  -8  14    3.90    0.20 
   4  -8  14    4.24    0.18 
   4   8  14    4.01    0.19 
   4  -8  12   44.74    0.81 
   4  -8  12   44.30    0.72 
   4   8  12   44.77    0.77 
   4  -8  10   15.75    0.33 
   4  -8  10   14.98    0.39 
   4   8  10   15.08    0.36 
   4  -8   8    0.00    0.05 
   4  -8   8    0.03    0.05 
   4   8   8    0.00    0.05 
   4  -8   6   46.88    0.80 
   4   8   6   45.87    0.76 
   4  -8   4    0.08    0.06 
   4   8   4    0.13    0.06 
  -4   8  -4    0.11    0.06 
   4  -8   2    5.58    0.21 
  -4   8  -2    5.39    0.17 
   4   8   2    5.57    0.18 
   4  -8   0   18.34    0.40 
  -4   8   0   18.52    0.37 
   4   8   0   18.18    0.36 
  -4  -8   2    4.40    0.15 
   4  -8  -2    4.52    0.18 
  -4  -8   2    4.68    0.17 
  -4   8   2    4.38    0.17 
  -4  -8   4    8.47    0.24 
  -4  -8   4    8.17    0.21 
   4  -8  -4    8.12    0.24 
  -4   8   4    8.07    0.23 
  -4  -8   6   16.08    0.36 
   4  -8  -6   16.21    0.36 
  -4   8   6   16.89    0.37 
  -4  -8   8    1.36    0.11 
   4  -8  -8    1.23    0.11 
  -4   8   8    1.12    0.11 
  -4  -8  10    0.61    0.09 
   4  -8 -10    0.79    0.09 
  -4   8  10    0.56    0.09 
  -4  -8  12    0.41    0.08 
  -4   8  12    0.27    0.07 
  -4  -8  14    2.49    0.15 
  -4   8  14    2.41    0.15 
  -4  -8  16    1.14    0.12 
  -4   8  16    1.22    0.13 
  -4  -8  18    4.57    0.21 
  -4   8  18    4.27    0.20 
  -4  -8  20    1.38    0.14 
  -4   8  20    1.48    0.14 
  -4  -8  22    0.39    0.10 
  -4   8  22    0.50    0.10 
  -4  -8  24    9.30    0.34 
  -4   8  24    9.14    0.32 
  -4  -8  26    2.45    0.20 
  -4   8  26    2.61    0.19 
  -4  -8  28    0.10    0.10 
  -4   8  28    0.11    0.08 
   4  -9  25    0.11    0.09 
   4  -9  23    0.16    0.10 
   4   9  23    0.14    0.08 
   4  -9  21    0.11    0.09 
   4   9  21    0.07    0.08 
   4  -9  19    0.34    0.10 
   4   9  19    0.54    0.11 
   4  -9  17    0.83    0.13 
   4   9  17    0.82    0.12 
   4  -9  15    0.40    0.10 
   4   9  15    0.61    0.10 
   4  -9  13    4.24    0.22 
   4   9  13    4.52    0.21 
   4  -9  11    0.43    0.10 
   4   9  11    0.44    0.09 
   4  -9   9    2.70    0.18 
   4   9   9    2.84    0.16 
   4  -9   7    0.77    0.11 
   4   9   7    0.74    0.09 
   4  -9   5    4.02    0.21 
  -4  -9  -5    4.00    0.18 
   4   9   5    4.20    0.18 
   4  -9   3    9.84    0.31 
   4   9   3    9.76    0.27 
   4  -9   1    0.40    0.09 
  -4   9  -1    0.43    0.07 
  -4  -9   1    6.65    0.20 
   4  -9  -1    6.39    0.24 
  -4  -9   1    6.64    0.22 
  -4   9   1    6.84    0.22 
   4  -9  -3    6.23    0.23 
  -4  -9   3    6.04    0.22 
  -4  -9   3    6.05    0.19 
  -4   9   3    6.41    0.22 
   4  -9  -5    0.82    0.10 
  -4  -9   5    0.83    0.10 
  -4   9   5    0.80    0.10 
  -4  -9   7    5.87    0.22 
   4  -9  -7    5.43    0.21 
  -4   9   7    5.96    0.22 
  -4  -9   9    0.23    0.07 
  -4   9   9    0.22    0.07 
  -4  -9  11    7.65    0.26 
  -4   9  11    7.59    0.26 
  -4  -9  13    5.00    0.22 
  -4   9  13    4.47    0.21 
  -4  -9  15    0.84    0.12 
  -4   9  15    0.78    0.11 
  -4  -9  17    3.93    0.21 
  -4   9  17    4.44    0.22 
  -4  -9  19    0.47    0.10 
  -4   9  19    0.65    0.11 
  -4  -9  21    2.19    0.19 
  -4   9  21    2.19    0.18 
  -4  -9  23    0.95    0.14 
  -4   9  23    0.86    0.12 
  -4  -9  25    1.03    0.16 
  -4   9  25    0.96    0.14 
  -4  -9  27    2.84    0.26 
   4 -10  20    5.67    0.30 
   4  10  20    5.72    0.27 
   4 -10  18   14.98    0.46 
   4  10  18   16.05    0.44 
   4 -10  16   18.57    0.51 
   4  10  16   18.14    0.47 
   4 -10  14    0.02    0.08 
   4  10  14    0.00    0.06 
   4 -10  12   23.24    0.56 
   4  10  12   22.47    0.51 
   4 -10  10    4.46    0.24 
   4  10  10    4.69    0.22 
   4 -10   8    2.41    0.19 
   4  10   8    2.77    0.17 
   4 -10   6   17.98    0.46 
   4  10   6   17.66    0.42 
   4 -10   4   -0.03    0.07 
  -4 -10  -2    2.30    0.15 
   4 -10   2    1.82    0.17 
  -4 -10   0    2.01    0.16 
  -4 -10   0    2.17    0.14 
  -4 -10   0    1.88    0.13 
   4 -10   0    2.15    0.17 
  -4 -10   2    0.96    0.10 
   4 -10  -2    1.15    0.13 
  -4  10   2    0.92    0.10 
   4 -10  -4    0.36    0.09 
  -4 -10   4    0.54    0.09 
  -4  10   4    0.55    0.09 
  -4 -10   6    1.30    0.13 
   4 -10  -6    1.23    0.17 
  -4  10   6    1.42    0.13 
  -4 -10   8    0.16    0.07 
  -4  10   8    0.15    0.07 
  -4 -10  10    1.03    0.12 
  -4  10  10    1.00    0.12 
  -4 -10  12    0.35    0.09 
  -4  10  12    0.22    0.08 
  -4 -10  14    0.76    0.11 
  -4  10  14    0.81    0.12 
  -4 -10  16    0.39    0.10 
  -4  10  16    0.42    0.10 
  -4 -10  18    5.94    0.27 
  -4  10  18    6.47    0.28 
  -4 -10  20    5.17    0.26 
  -4  10  20    5.41    0.26 
  -4 -10  22   -0.11    0.08 
  -4 -10  24   12.33    0.46 
   4 -11  15    0.99    0.16 
   4  11  15    1.18    0.15 
   4 -11  13    0.06    0.09 
   4  11  13    0.11    0.08 
   4 -11  11    1.69    0.18 
   4  11  11    1.86    0.17 
   4 -11   9    1.70    0.17 
   4 -11   7    0.40    0.11 
   4 -11   5    1.46    0.16 
  -4 -11  -3    2.32    0.16 
   4 -11   3    2.32    0.19 
   4 -11   1    0.05    0.08 
  -4 -11   1    3.16    0.20 
   4 -11  -1    3.22    0.21 
   4 -11  -3    0.90    0.13 
  -4 -11   3    0.97    0.13 
  -4 -11   5    0.85    0.13 
  -4  11   5    0.84    0.11 
  -4 -11   7    3.00    0.21 
  -4  11   7    2.47    0.17 
  -4  11   9    0.47    0.10 
  -4  11  11    1.42    0.15 
  -4  11  13    1.09    0.14 
  -4  11  15    0.15    0.09 
  -4  11  17    2.78    0.23 
  -4 -12 -10    2.82    0.20 
  -4 -12  -8    3.92    0.22 
   4 -12   8    4.18    0.26 
   4 -12   6   11.44    0.40 
   4 -12   4   -0.11    0.08 
   4 -12   2    3.67    0.24 
   4 -12   0    1.95    0.18 
  -4 -12   2    1.09    0.16 
  -4 -12   4    1.96    0.19 
  -4 -12   6    0.14    0.10 
  -4 -12   8    0.76    0.13 
  -4 -12  10   -0.01    0.10 
  -4  12  10   -0.07    0.06 
  -4  12  12    0.19    0.11 
   5   0  35   -0.08    0.08 
   5   0  33    0.10    0.09 
   5   0  31    0.00    0.08 
   5   0  29   -0.01    0.07 
   5   0  27    0.19    0.08 
   5   0  25    0.08    0.07 
   5   0  23    0.21    0.07 
  -5   0 -23    0.08    0.04 
  -5   0 -21   -0.04    0.03 
   5   0  21    0.09    0.06 
   5   0  19    0.22    0.06 
   5   0  19    0.19    0.04 
   5   0  17    0.01    0.05 
   5   0  17    0.05    0.03 
  -5   0 -17   -0.02    0.03 
   5   0  13    0.05    0.04 
  -5   0 -13    0.04    0.03 
   5   0  13    0.06    0.03 
   5   0  11   -0.07    0.03 
  -5   0 -11   -0.09    0.02 
   5   0  11   -0.08    0.02 
   5   0   9    0.08    0.03 
  -5   0  -9   -0.01    0.02 
   5   0   9    0.09    0.04 
  -5   0  -7   -0.13    0.02 
   5   0   7   -0.10    0.03 
   5   0   7   -0.21    0.03 
   5   0   5    0.00    0.02 
  -5   0  -5    0.01    0.02 
   5   0   3    0.09    0.02 
  -5   0  -3    0.09    0.02 
   5   0   3    0.06    0.02 
  -5   0  -1   -0.33    0.02 
  -5   0   1    0.02    0.01 
  -5   0   3    0.15    0.02 
  -5   0   5    0.02    0.02 
  -5   0   5    0.01    0.02 
  -5   0   7   -0.05    0.02 
  -5   0   7   -0.05    0.02 
  -5   0   9    0.02    0.02 
  -5   0   9    0.03    0.02 
  -5   0  11    0.00    0.02 
  -5   0  11    0.04    0.03 
  -5   0  13    0.01    0.02 
  -5   0  13   -0.01    0.03 
  -5   0  15    0.01    0.03 
  -5   0  15    0.00    0.02 
  -5   0  17    0.03    0.03 
  -5   0  17   -0.03    0.04 
  -5   0  19   -0.01    0.04 
  -5   0  19   -0.02    0.02 
  -5   0  21    0.03    0.03 
  -5   0  21    0.03    0.06 
  -5   0  23    0.05    0.03 
  -5   0  23    0.04    0.06 
  -5   0  25    0.01    0.04 
  -5   0  25   -0.06    0.06 
  -5   0  27    0.06    0.07 
  -5   0  29    0.01    0.06 
  -5   0  31    0.01    0.07 
  -5   0  33   -0.03    0.08 
  -5   0  35    0.14    0.09 
  -5   0  37   -0.03    0.07 
   5  -1  36   19.94    0.54 
   5   1  36   20.62    0.55 
   5  -1  34    9.78    0.36 
   5   1  34    9.63    0.36 
   5  -1  32    6.00    0.28 
   5   1  32    5.87    0.27 
   5  -1  30    1.39    0.15 
   5   1  30    1.64    0.16 
   5  -1  28   44.87    0.82 
   5   1  28   43.59    0.81 
  -5  -1 -26    0.23    0.06 
   5  -1  26    0.30    0.09 
   5   1  26    0.21    0.07 
  -5  -1 -24    0.39    0.06 
   5  -1  24    0.32    0.08 
   5   1  24    0.48    0.08 
   5  -1  22   26.53    0.44 
  -5  -1 -22   24.92    0.44 
   5  -1  22   24.76    0.51 
   5   1  22   24.95    0.51 
  -5  -1 -20    0.59    0.06 
   5  -1  20    0.54    0.06 
   5  -1  20    0.53    0.08 
   5   1  20    0.58    0.08 
  -5   1 -20    0.52    0.05 
   5  -1  18    4.33    0.17 
  -5  -1 -18    4.60    0.14 
   5  -1  18    4.42    0.14 
  -5   1 -18    4.81    0.12 
   5   1  18    4.15    0.16 
   5  -1  16   12.12    0.24 
   5  -1  16   12.38    0.29 
  -5  -1 -16   12.35    0.25 
   5   1  16   12.35    0.28 
  -5   1 -16   12.44    0.22 
   5   1  16   12.69    0.21 
   5  -1  14   18.66    0.32 
   5  -1  14   17.94    0.35 
  -5  -1 -14   18.27    0.32 
   5   1  14   18.75    0.36 
   5   1  14   18.74    0.28 
  -5   1 -14   18.87    0.30 
   5  -1  12   26.90    0.42 
   5  -1  12   26.01    0.44 
  -5  -1 -12   26.80    0.42 
   5   1  12   26.50    0.45 
  -5   1 -12   27.10    0.40 
   5   1  12   27.50    0.38 
   5  -1  10    1.54    0.08 
   5  -1  10    1.60    0.07 
  -5  -1 -10    1.58    0.07 
  -5   1 -10    1.49    0.06 
   5   1  10    1.52    0.08 
   5   1  10    1.49    0.05 
  -5  -1  -8    1.45    0.06 
   5  -1   8    1.35    0.06 
   5  -1   8    1.34    0.07 
  -5   1  -8    1.34    0.05 
  -5  -1  -6  244.53    3.28 
   5  -1   6  228.45    3.10 
   5  -1   6  236.11    3.22 
  -5   1  -6  235.06    3.18 
   5   1   6  232.44    3.27 
   5  -1   4   24.44    0.35 
   5  -1   4   24.76    0.37 
  -5  -1  -4   24.38    0.36 
  -5   1  -4   24.17    0.35 
  -5  -1  -2  114.79    1.61 
   5  -1   2  110.94    1.54 
   5  -1   2  113.93    1.54 
  -5   1  -2  112.91    1.60 
  -5  -1   0  196.87    2.69 
   5  -1   0  206.82    2.88 
  -5   1   0  206.85    2.79 
  -5  -1   2   30.07    0.43 
  -5   1   2   31.08    0.43 
  -5   1   2   31.57    0.40 
  -5  -1   4   30.07    0.43 
  -5  -1   4   29.89    0.42 
  -5   1   4   30.57    0.40 
  -5   1   4   29.79    0.43 
  -5  -1   6  150.78    3.66 
  -5  -1   6  149.33    2.09 
  -5   1   6  152.80    2.13 
  -5   1   6  155.10    2.06 
  -5  -1   8  436.19    5.87 
  -5  -1   8  435.12    5.64 
  -5   1   8  436.25    5.79 
  -5   1   8  434.30    5.74 
  -5  -1  10   45.34    0.61 
  -5  -1  10   45.67    0.65 
  -5   1  10   45.07    0.63 
  -5   1  10   45.29    0.64 
  -5  -1  12    0.13    0.02 
  -5  -1  12    0.11    0.04 
  -5   1  12    0.26    0.04 
  -5   1  12    0.09    0.03 
  -5  -1  14  399.93    5.57 
  -5  -1  14  398.48    5.26 
  -5   1  14  406.55    5.43 
  -5   1  14  411.50    5.59 
  -5  -1  16    7.07    0.15 
  -5  -1  16    7.39    0.20 
  -5   1  16    7.04    0.17 
  -5   1  16    7.31    0.20 
  -5  -1  18   28.06    0.50 
  -5  -1  18   27.79    0.41 
  -5   1  18   27.32    0.49 
  -5   1  18   27.30    0.44 
  -5  -1  20  158.20    2.02 
  -5  -1  20  153.26    2.12 
  -5   1  20  157.49    2.06 
  -5   1  20  158.08    2.12 
  -5  -1  22   22.02    0.35 
  -5  -1  22   21.11    0.45 
  -5   1  22   21.71    0.39 
  -5   1  22   22.03    0.45 
  -5  -1  24   67.48    1.07 
  -5   1  24   67.36    1.06 
  -5   1  24   68.53    0.98 
  -5  -1  26  102.45    1.55 
  -5   1  26  106.46    1.55 
  -5   1  26  105.75    1.45 
  -5  -1  28   42.75    0.79 
  -5   1  28   42.25    0.77 
  -5   1  28   42.58    0.71 
  -5  -1  30   25.51    0.57 
  -5   1  30   24.28    0.54 
  -5  -1  32    5.43    0.26 
  -5   1  32    6.07    0.26 
  -5  -1  34   41.85    0.83 
  -5   1  34   41.12    0.81 
  -5  -1  36    4.71    0.27 
  -5   1  36    4.75    0.26 
  -5   1  38    0.16    0.09 
   5  -2  35    5.33    0.28 
   5   2  35    4.85    0.27 
   5  -2  33    2.34    0.20 
   5   2  33    2.23    0.19 
   5  -2  31    4.02    0.23 
   5   2  31    3.96    0.23 
   5  -2  29   11.90    0.37 
   5   2  29   11.53    0.35 
  -5  -2 -27   -0.01    0.05 
   5  -2  27    0.11    0.08 
   5   2  27    0.03    0.07 
   5  -2  25   24.67    0.52 
  -5  -2 -25   24.18    0.46 
   5   2  25   24.23    0.52 
  -5  -2 -23   15.26    0.33 
   5  -2  23   15.79    0.38 
   5  -2  23   15.66    0.33 
   5   2  23   15.61    0.38 
   5  -2  21   13.80    0.34 
   5  -2  21   13.85    0.30 
  -5  -2 -21   13.62    0.30 
   5   2  21   13.42    0.34 
   5  -2  19   50.87    0.77 
   5  -2  19   52.16    0.82 
   5   2  19   49.75    0.81 
   5  -2  17    6.54    0.18 
   5  -2  17    6.10    0.20 
  -5   2 -17    6.29    0.13 
   5   2  17    6.39    0.20 
   5  -2  15   60.33    0.89 
   5  -2  15   60.86    0.87 
   5   2  15   59.92    0.89 
  -5   2 -15   58.78    0.80 
   5  -2  13   55.19    0.80 
   5  -2  13   54.91    0.82 
   5   2  13   55.36    0.82 
  -5   2 -13   55.17    0.74 
   5  -2  11   10.31    0.22 
   5  -2  11    9.77    0.21 
  -5   2 -11    9.72    0.17 
   5  -2   9  147.14    2.04 
  -5  -2  -9  147.29    1.90 
   5  -2   9  145.55    1.98 
   5   2   9  143.91    1.99 
  -5   2  -9  146.25    1.89 
   5  -2   7   15.84    0.28 
  -5  -2  -7   16.34    0.28 
   5  -2   7   15.31    0.27 
  -5   2  -7   15.78    0.24 
  -5  -2  -5   59.48    0.82 
   5  -2   5   60.90    0.80 
   5  -2   5   61.04    0.83 
  -5   2  -5   60.04    0.79 
   5  -2   3  120.51    1.55 
   5  -2   3  112.95    1.53 
  -5  -2  -3  120.36    1.68 
  -5   2  -3  117.44    1.64 
  -5  -2  -1    5.46    0.12 
   5  -2   1    5.36    0.09 
  -5   2  -1    5.32    0.11 
   5  -2  -1  162.38    2.25 
  -5  -2   1  158.73    2.17 
  -5   2   1  155.69    2.08 
   5  -2  -3   34.83    0.50 
  -5  -2   3   33.18    0.47 
  -5   2   3   34.72    0.49 
  -5  -2   5   42.54    0.60 
   5  -2  -5   41.57    0.60 
  -5  -2   5   42.87    0.57 
  -5   2   5   42.66    0.55 
  -5  -2   7   62.57    0.81 
  -5  -2   7   62.48    0.86 
  -5   2   7   61.47    0.85 
  -5   2   7   61.69    0.81 
  -5  -2   9    0.16    0.04 
  -5  -2   9    0.11    0.02 
  -5   2   9    0.10    0.03 
  -5   2   9    0.10    0.03 
  -5  -2  11   21.19    0.36 
  -5  -2  11   20.64    0.30 
  -5   2  11   20.85    0.35 
  -5   2  11   20.26    0.34 
  -5  -2  13    8.84    0.15 
  -5  -2  13    8.47    0.21 
  -5   2  13    8.55    0.19 
  -5   2  13    8.10    0.19 
  -5  -2  15    9.92    0.17 
  -5  -2  15   10.51    0.25 
  -5   2  15   10.22    0.22 
  -5   2  15   10.41    0.23 
  -5  -2  17    5.75    0.19 
  -5  -2  17    5.89    0.12 
  -5   2  17    6.06    0.18 
  -5   2  17    5.68    0.16 
  -5  -2  19    0.45    0.08 
  -5  -2  19    0.62    0.04 
  -5   2  19    0.47    0.06 
  -5   2  19    0.53    0.07 
  -5  -2  21    1.19    0.11 
  -5   2  21    1.28    0.09 
  -5   2  21    1.16    0.10 
  -5  -2  23    0.04    0.06 
  -5   2  23    0.02    0.05 
  -5   2  23    0.14    0.04 
  -5  -2  25    0.04    0.07 
  -5   2  25    0.10    0.07 
  -5   2  25   -0.02    0.04 
  -5  -2  27    1.16    0.14 
  -5   2  27    1.13    0.12 
  -5   2  27    1.08    0.09 
  -5  -2  29    0.55    0.10 
  -5   2  29    0.66    0.11 
  -5   2  29    0.48    0.08 
  -5  -2  31    1.17    0.15 
  -5   2  31    1.19    0.14 
  -5  -2  33    2.06    0.19 
  -5   2  33    1.85    0.17 
  -5  -2  35    0.41    0.12 
  -5   2  35    0.23    0.10 
  -5  -2  37    3.10    0.24 
  -5   2  37    3.63    0.23 
   5  -3  34    5.39    0.28 
   5   3  34    5.97    0.29 
   5  -3  32    2.58    0.21 
   5   3  32    2.54    0.19 
   5  -3  30    1.98    0.17 
  -5  -3 -30    1.91    0.14 
   5   3  30    2.18    0.18 
  -5  -3 -28   15.58    0.37 
   5  -3  28   15.61    0.42 
   5   3  28   15.91    0.42 
  -5  -3 -26    0.93    0.10 
   5  -3  26    0.88    0.12 
   5   3  26    1.01    0.12 
   5  -3  24    2.91    0.15 
   5  -3  24    2.84    0.18 
   5   3  24    3.06    0.17 
   5  -3  22    8.62    0.24 
   5  -3  22    8.86    0.27 
   5   3  22    8.97    0.27 
   5  -3  20    4.70    0.19 
   5  -3  20    4.97    0.18 
   5   3  20    4.71    0.19 
   5   3  20    4.79    0.17 
   5  -3  18    0.72    0.09 
   5  -3  18    0.55    0.07 
   5   3  18    0.68    0.08 
   5   3  18    0.67    0.09 
   5  -3  16    9.37    0.24 
   5  -3  16    9.43    0.25 
   5   3  16    9.12    0.24 
   5   3  16    9.25    0.23 
   5  -3  14   14.17    0.30 
   5  -3  14   14.37    0.30 
  -5   3 -14   13.95    0.22 
   5   3  14   14.13    0.29 
   5   3  14   13.74    0.30 
   5  -3  12   15.40    0.31 
   5  -3  12   15.46    0.31 
  -5   3 -12   15.45    0.24 
   5   3  12   16.13    0.31 
   5   3  10    2.51    0.10 
  -5   3 -10    2.41    0.07 
   5  -3   8   33.25    0.50 
   5  -3   8   32.87    0.52 
   5   3   8   33.40    0.51 
  -5   3  -8   33.30    0.46 
   5  -3   6   80.20    1.09 
   5  -3   6   78.09    1.04 
  -5   3  -6   77.33    1.02 
  -5  -3  -4   86.92    1.16 
   5  -3   4   88.21    1.13 
   5  -3   4   86.43    1.18 
  -5   3  -4   86.03    1.18 
   5  -3   2    0.15    0.02 
  -5  -3  -2    0.13    0.03 
  -5   3  -2    0.25    0.03 
   5  -3   0   51.80    0.73 
  -5  -3   0   51.20    0.71 
   5  -3   0   52.88    0.67 
  -5   3   0   50.88    0.71 
   5  -3  -2   53.28    0.74 
   5  -3  -2   52.74    0.67 
  -5  -3   2   51.65    0.72 
  -5   3   2   54.65    0.73 
   5  -3  -4   12.06    0.23 
  -5  -3   4   11.89    0.20 
  -5   3   4   12.01    0.22 
  -5  -3   6   89.02    1.18 
   5  -3  -6   87.66    1.17 
  -5  -3   6   86.46    1.13 
  -5   3   6   89.72    1.18 
  -5   3   6   85.87    1.13 
   5  -3  -8  162.68    2.19 
  -5  -3   8  160.55    2.17 
  -5  -3   8  160.59    2.10 
  -5   3   8  159.12    2.17 
  -5   3   8  162.58    2.19 
  -5  -3  10    5.93    0.11 
  -5  -3  10    5.77    0.16 
  -5   3  10    5.78    0.13 
  -5   3  10    6.11    0.16 
  -5  -3  12    2.81    0.07 
  -5  -3  12    2.67    0.12 
  -5   3  12    2.52    0.10 
  -5   3  12    2.62    0.09 
  -5  -3  14  174.87    2.25 
  -5  -3  14  166.82    2.17 
  -5   3  14  170.84    2.23 
  -5   3  14  166.71    2.20 
  -5  -3  16    1.93    0.05 
  -5  -3  16    1.90    0.12 
  -5   3  16    2.08    0.10 
  -5   3  16    1.90    0.10 
  -5  -3  18    0.05    0.05 
  -5   3  18    0.06    0.04 
  -5   3  18    0.13    0.04 
  -5  -3  20   67.84    1.05 
  -5   3  20   69.07    1.01 
  -5   3  20   68.58    1.02 
  -5  -3  22    8.10    0.26 
  -5   3  22    8.06    0.24 
  -5   3  22    7.96    0.23 
  -5  -3  24    6.86    0.25 
  -5   3  24    6.89    0.21 
  -5   3  24    7.04    0.23 
  -5  -3  26   39.35    0.74 
  -5   3  26   39.08    0.70 
  -5   3  26   40.10    0.67 
  -5  -3  28   20.42    0.50 
  -5   3  28   20.95    0.47 
  -5   3  28   20.32    0.43 
  -5  -3  30    4.71    0.25 
  -5   3  30    5.33    0.23 
  -5   3  30    5.21    0.20 
  -5  -3  32    3.10    0.21 
  -5   3  32    3.01    0.17 
  -5   3  32    3.76    0.21 
  -5  -3  34   15.83    0.48 
  -5   3  34   16.70    0.45 
  -5  -3  36    0.63    0.14 
  -5   3  36    0.59    0.12 
  -5   3  38    0.44    0.12 
   5  -4  35   12.13    0.48 
   5   4  35   12.80    0.47 
   5  -4  33    2.27    0.20 
   5   4  33    2.25    0.19 
   5  -4  31   16.47    0.46 
  -5  -4 -31   17.03    0.42 
   5   4  31   17.04    0.46 
   5  -4  29   32.65    0.68 
  -5  -4 -29   33.73    0.64 
   5   4  29   33.41    0.68 
   5  -4  27   -0.06    0.05 
   5  -4  27    0.54    0.11 
   5   4  27    0.06    0.07 
   5  -4  25   45.87    0.79 
   5  -4  25   47.61    0.83 
   5   4  25   45.95    0.82 
   5  -4  23   21.13    0.47 
   5  -4  23   21.06    0.45 
   5   4  23   20.72    0.46 
   5   4  23   21.29    0.44 
   5  -4  21   24.80    0.49 
   5  -4  21   26.10    0.52 
   5   4  21   25.32    0.48 
   5   4  21   25.28    0.51 
   5  -4  19   69.35    1.07 
   5  -4  19   72.22    1.08 
   5   4  19   69.46    1.05 
   5   4  19   72.29    1.09 
   5  -4  17    0.15    0.06 
   5  -4  17    0.22    0.06 
   5   4  17    0.52    0.08 
   5   4  17    0.23    0.06 
   5  -4  15  111.74    1.57 
   5  -4  15  112.27    1.55 
   5   4  15  112.75    1.55 
   5   4  15  112.62    1.56 
   5  -4  13   78.53    1.14 
   5  -4  13   79.88    1.12 
   5   4  13   77.90    1.12 
   5  -4  11   26.74    0.47 
   5  -4  11   26.31    0.44 
  -5   4 -11   26.35    0.37 
   5   4  11   26.54    0.46 
   5  -4   9  152.49    2.00 
   5  -4   9  150.72    1.95 
  -5   4  -9  146.86    1.89 
   5   4   9  146.66    1.97 
   5  -4   7    5.83    0.17 
   5  -4   7    5.92    0.14 
   5   4   7    5.73    0.16 
  -5   4  -7    5.60    0.12 
   5  -4   5  155.20    2.02 
   5  -4   5  152.19    1.95 
   5   4   5  151.67    1.99 
  -5   4  -5  150.19    2.08 
   5  -4   3  126.43    1.60 
   5  -4   3  126.58    1.68 
  -5   4  -3  124.02    1.62 
   5  -4   1    7.47    0.18 
  -5  -4  -1    7.36    0.17 
   5  -4   1    7.23    0.13 
  -5   4  -1    7.31    0.16 
  -5  -4   1  217.76    3.03 
   5  -4  -1  221.13    3.13 
   5  -4  -1  217.26    2.84 
  -5   4   1  221.70    3.08 
   5  -4  -3   60.40    0.85 
  -5  -4   3   59.35    0.82 
  -5   4   3   61.08    0.84 
  -5  -4   5    9.87    0.22 
   5  -4  -5    9.42    0.20 
  -5  -4   5    9.67    0.18 
  -5   4   5    9.82    0.21 
  -5  -4   7   58.69    0.78 
   5  -4  -7   58.62    0.82 
  -5  -4   7   56.91    0.84 
  -5   4   7   59.96    0.84 
  -5  -4   9    0.00    0.03 
  -5  -4   9    0.02    0.02 
   5  -4  -9    0.16    0.04 
  -5   4   9    0.01    0.03 
  -5   4   9    0.06    0.02 
  -5  -4  11   15.95    0.32 
  -5  -4  11   16.05    0.24 
  -5   4  11   15.83    0.27 
  -5   4  11   16.58    0.32 
  -5  -4  13   16.86    0.34 
  -5  -4  13   16.57    0.24 
  -5   4  13   16.52    0.29 
  -5   4  13   16.56    0.33 
  -5  -4  15    1.86    0.12 
  -5   4  15    2.03    0.10 
  -5   4  15    2.08    0.11 
  -5  -4  17    3.10    0.15 
  -5   4  17    3.27    0.13 
  -5   4  17    2.88    0.13 
  -5  -4  19    2.51    0.14 
  -5   4  19    3.04    0.13 
  -5   4  19    2.59    0.13 
  -5  -4  21    0.66    0.09 
  -5   4  21    0.69    0.09 
  -5   4  21    0.64    0.08 
  -5  -4  23    0.73    0.10 
  -5   4  23    0.73    0.09 
  -5   4  23    0.69    0.09 
  -5  -4  25    0.15    0.08 
  -5   4  25    0.01    0.05 
  -5   4  25    0.01    0.05 
  -5  -4  27    1.24    0.14 
  -5   4  27    1.23    0.12 
  -5   4  27    1.52    0.13 
  -5  -4  29    0.00    0.08 
  -5   4  29    0.21    0.08 
  -5   4  29    0.09    0.06 
  -5  -4  31    4.68    0.25 
  -5   4  31    4.47    0.22 
  -5   4  31    4.78    0.21 
  -5  -4  33    3.16    0.23 
  -5   4  33    3.64    0.21 
  -5   4  33    2.84    0.18 
  -5  -4  35    1.01    0.15 
  -5   4  35    1.17    0.16 
   5  -5  34    2.39    0.22 
   5   5  34    2.38    0.20 
   5  -5  32    0.65    0.13 
  -5  -5 -32    0.62    0.11 
   5   5  32    0.69    0.13 
   5  -5  30    0.13    0.09 
  -5  -5 -30    0.14    0.07 
   5   5  30    0.14    0.09 
   5  -5  28    5.44    0.25 
   5  -5  28    5.16    0.23 
   5   5  28    5.28    0.24 
   5  -5  26    2.43    0.18 
   5  -5  26    2.62    0.17 
   5   5  26    2.67    0.18 
   5  -5  24    4.52    0.22 
   5  -5  24    4.51    0.21 
   5   5  24    4.53    0.20 
   5   5  24    4.73    0.21 
   5  -5  22    2.29    0.16 
   5  -5  22    2.07    0.15 
   5   5  22    2.03    0.14 
   5  -5  20    2.68    0.16 
   5  -5  20    2.91    0.16 
   5   5  20    2.89    0.15 
   5  -5  18    0.81    0.10 
   5  -5  18    0.84    0.10 
   5   5  18    0.85    0.10 
   5  -5  16    2.63    0.14 
   5  -5  16    2.47    0.14 
   5   5  16    2.33    0.13 
   5  -5  14    6.17    0.19 
   5  -5  14    6.15    0.21 
   5   5  14    5.86    0.19 
   5  -5  12    5.57    0.19 
   5  -5  12    5.63    0.17 
   5   5  12    5.41    0.18 
   5  -5  10    0.29    0.06 
   5  -5  10    0.30    0.05 
  -5   5 -10    0.29    0.03 
   5   5  10    0.24    0.05 
   5  -5   8   13.36    0.26 
   5   5   8   13.16    0.28 
  -5   5  -8   13.20    0.23 
   5  -5   6   16.43    0.28 
   5  -5   6   16.01    0.34 
  -5   5  -6   16.32    0.27 
   5   5   6   16.36    0.32 
   5  -5   4    6.57    0.14 
   5  -5   4    6.22    0.19 
   5   5   4    6.10    0.17 
  -5   5  -4    6.24    0.15 
   5  -5   2    9.27    0.23 
   5  -5   2    9.29    0.17 
  -5   5  -2    9.13    0.19 
  -5  -5   0    2.61    0.10 
   5  -5   0    2.37    0.07 
   5  -5   0    2.46    0.11 
  -5   5   0    2.42    0.09 
   5  -5  -2    0.46    0.03 
   5  -5  -2    0.36    0.05 
  -5  -5   2    0.49    0.05 
  -5   5   2    0.39    0.05 
   5  -5  -4   10.62    0.24 
  -5  -5   4   10.71    0.21 
  -5   5   4   10.92    0.24 
  -5  -5   6   13.12    0.23 
  -5  -5   6   13.25    0.28 
   5  -5  -6   13.19    0.27 
  -5   5   6   13.39    0.28 
  -5  -5   8   14.19    0.24 
   5  -5  -8   13.83    0.28 
  -5  -5   8   14.09    0.30 
  -5   5   8   14.59    0.30 
  -5  -5  10   12.92    0.21 
   5  -5 -10   12.83    0.26 
  -5  -5  10   12.54    0.28 
  -5   5  10   12.49    0.28 
   5  -5 -12    2.22    0.10 
  -5  -5  12    2.06    0.11 
  -5  -5  12    2.13    0.07 
  -5   5  12    2.28    0.12 
  -5  -5  14   12.18    0.30 
  -5   5  14   12.11    0.29 
  -5   5  14   12.13    0.25 
  -5  -5  16    3.27    0.15 
  -5   5  16    3.45    0.13 
  -5   5  16    3.42    0.15 
  -5  -5  18    8.00    0.25 
  -5   5  18    7.81    0.24 
  -5   5  18    7.98    0.21 
  -5  -5  20    2.87    0.17 
  -5   5  20    3.05    0.14 
  -5   5  20    3.09    0.15 
  -5  -5  22    4.63    0.21 
  -5   5  22    4.54    0.18 
  -5   5  22    4.96    0.20 
  -5  -5  24    1.00    0.12 
  -5   5  24    1.23    0.11 
  -5   5  24    1.45    0.12 
  -5  -5  26    6.83    0.28 
  -5   5  26    7.06    0.25 
  -5   5  26    6.76    0.23 
  -5  -5  28    2.56    0.19 
  -5   5  28    2.99    0.17 
  -5  -5  30    2.41    0.20 
  -5   5  30    2.31    0.16 
  -5  -5  32    0.83    0.14 
  -5   5  32    0.74    0.11 
  -5  -5  34    0.78    0.15 
  -5   5  34    0.77    0.11 
   5  -6  33    0.47    0.14 
  -5  -6 -33    0.77    0.12 
   5  -6  31   12.64    0.41 
  -5  -6 -31   12.31    0.38 
   5  -6  29   23.06    0.55 
   5  -6  29   23.38    0.56 
   5  -6  27    0.55    0.11 
   5  -6  27    0.46    0.10 
   5  -6  25   36.82    0.71 
   5  -6  25   36.15    0.71 
   5   6  25   37.71    0.70 
   5  -6  23   12.17    0.35 
   5  -6  23   12.54    0.36 
   5   6  23   12.90    0.35 
   5  -6  21   29.96    0.61 
   5  -6  21   30.38    0.59 
   5   6  21   29.34    0.58 
   5  -6  19   62.26    1.00 
   5  -6  19   64.43    1.04 
   5   6  19   64.53    1.01 
   5  -6  17    0.52    0.08 
   5  -6  17    0.47    0.09 
   5   6  17    0.47    0.08 
   5  -6  15   97.23    1.38 
   5  -6  15   96.52    1.43 
   5   6  15   97.68    1.41 
   5  -6  13   74.46    1.07 
   5  -6  13   73.45    1.13 
   5   6  13   72.84    1.10 
   5  -6  11    4.72    0.16 
   5  -6  11    4.62    0.19 
   5   6  11    4.73    0.17 
   5  -6   9   85.56    1.18 
   5  -6   9   84.67    1.26 
   5   6   9   85.85    1.23 
   5  -6   7    6.00    0.16 
   5  -6   7    5.86    0.20 
   5   6   7    5.90    0.18 
  -5   6  -7    6.04    0.14 
   5  -6   5   67.44    0.92 
   5  -6   5   66.18    1.01 
  -5   6  -5   67.75    0.93 
   5   6   5   66.59    0.97 
   5  -6   3   43.55    0.71 
   5  -6   3   44.77    0.63 
  -5   6  -3   44.27    0.65 
   5   6   3   45.18    0.68 
   5  -6   1    6.44    0.14 
   5  -6   1    6.36    0.20 
  -5   6  -1    6.55    0.17 
   5  -6  -1   90.87    1.29 
  -5  -6   1   92.91    1.26 
   5  -6  -1   91.60    1.20 
  -5   6   1   92.77    1.27 
   5  -6  -3   15.13    0.24 
  -5  -6   3   14.54    0.28 
   5  -6  -3   14.77    0.31 
  -5   6   3   14.99    0.30 
  -5  -6   5   18.66    0.36 
   5  -6  -5   18.85    0.36 
  -5  -6   5   18.84    0.32 
  -5   6   5   17.78    0.35 
   5  -6  -7   29.29    0.49 
  -5  -6   7   28.72    0.44 
  -5  -6   7   29.58    0.51 
  -5   6   7   28.72    0.50 
  -5  -6   9    5.36    0.18 
  -5  -6   9    5.48    0.13 
   5  -6  -9    5.42    0.17 
  -5   6   9    5.25    0.18 
  -5  -6  11   30.57    0.54 
   5  -6 -11   29.92    0.49 
  -5   6  11   29.67    0.53 
   5  -6 -13   15.94    0.31 
  -5  -6  13   16.15    0.36 
  -5   6  13   15.97    0.36 
  -5  -6  15    2.49    0.14 
  -5   6  15    2.37    0.13 
  -5  -6  17    5.35    0.21 
  -5   6  17    5.71    0.21 
  -5  -6  19    4.59    0.20 
  -5   6  19    4.76    0.19 
  -5  -6  21    0.78    0.11 
  -5   6  21    0.58    0.09 
  -5  -6  23    0.81    0.12 
  -5   6  23    0.80    0.10 
  -5  -6  25    0.24    0.09 
  -5   6  25    0.15    0.07 
  -5  -6  27    1.22    0.14 
  -5   6  27    1.46    0.15 
  -5  -6  29    0.18    0.09 
  -5   6  29    0.22    0.08 
  -5  -6  31    5.99    0.29 
  -5   6  31    5.76    0.25 
  -5   6  33    4.84    0.24 
   5  -7  30    0.62    0.13 
   5  -7  30    0.68    0.13 
  -5  -7 -30    0.34    0.10 
   5  -7  28    0.03    0.08 
   5  -7  28    0.06    0.09 
   5  -7  26    6.81    0.29 
   5  -7  26    7.00    0.29 
   5   7  26    6.92    0.27 
   5  -7  24    1.40    0.15 
   5  -7  24    1.53    0.16 
   5   7  24    1.55    0.15 
   5  -7  22    0.08    0.07 
   5  -7  22   -0.04    0.07 
   5   7  22   -0.01    0.06 
   5  -7  20    6.20    0.24 
   5  -7  20    6.22    0.26 
   5   7  20    5.99    0.23 
   5  -7  18   -0.04    0.06 
   5  -7  18    0.04    0.07 
   5   7  18   -0.07    0.05 
   5  -7  16    0.98    0.12 
   5  -7  16    1.20    0.11 
   5   7  16    1.17    0.12 
   5  -7  14    8.84    0.29 
   5  -7  14    8.82    0.25 
   5   7  14    8.81    0.27 
   5  -7  12    0.38    0.08 
   5  -7  12    0.54    0.07 
   5   7  12    0.39    0.07 
   5  -7  10    5.53    0.21 
   5  -7  10    5.55    0.17 
   5   7  10    5.10    0.19 
   5  -7   8    4.84    0.15 
   5  -7   8    5.15    0.21 
   5   7   8    4.62    0.18 
   5  -7   6    0.04    0.04 
   5  -7   6   -0.01    0.05 
   5   7   6    0.06    0.04 
  -5   7  -6    0.09    0.04 
   5  -7   4    3.26    0.11 
   5  -7   4    3.39    0.16 
   5   7   4    3.02    0.14 
  -5   7  -4    3.54    0.12 
   5  -7   2   12.32    0.31 
   5  -7   2   12.92    0.24 
   5   7   2   11.99    0.28 
  -5   7  -2   12.55    0.27 
  -5  -7   0    0.32    0.05 
   5  -7   0    0.21    0.04 
   5  -7   0    0.27    0.06 
  -5   7   0    0.25    0.05 
   5  -7  -2    2.37    0.14 
  -5  -7   2    2.48    0.11 
  -5   7   2    2.32    0.12 
  -5  -7   4   36.79    0.62 
   5  -7  -4   36.17    0.62 
  -5  -7   4   37.07    0.57 
  -5   7   4   36.87    0.61 
   5  -7  -6    4.23    0.16 
  -5  -7   6    4.09    0.13 
  -5  -7   6    4.07    0.16 
  -5   7   6    4.00    0.16 
  -5  -7   8    0.34    0.05 
  -5  -7   8    0.42    0.07 
   5  -7  -8    0.43    0.07 
  -5   7   8    0.37    0.07 
   5  -7 -10   24.38    0.44 
  -5  -7  10   23.59    0.47 
  -5   7  10   24.11    0.47 
  -5  -7  12   13.54    0.33 
   5  -7 -12   13.31    0.29 
  -5   7  12   12.32    0.32 
  -5  -7  14   11.47    0.31 
  -5   7  14   11.51    0.31 
  -5  -7  16   10.05    0.30 
  -5   7  16    9.98    0.29 
  -5  -7  18   34.70    0.65 
  -5   7  18   33.71    0.64 
  -5  -7  20   17.50    0.43 
  -5   7  20   17.26    0.42 
  -5  -7  22    4.27    0.22 
  -5   7  22    4.14    0.21 
  -5  -7  24   19.48    0.49 
  -5   7  24   19.98    0.47 
  -5  -7  26    0.53    0.12 
  -5   7  26    0.55    0.10 
  -5  -7  28    0.28    0.10 
  -5   7  28    0.18    0.08 
  -5  -7  30   19.77    0.54 
  -5   7  30   19.99    0.50 
   5  -8  29    7.10    0.37 
   5  -8  27    0.39    0.11 
   5  -8  27    0.51    0.18 
   5  -8  25    7.05    0.29 
   5  -8  25    7.00    0.31 
   5  -8  23    2.71    0.20 
   5  -8  23    2.59    0.20 
   5   8  23    2.51    0.18 
   5  -8  21    4.00    0.23 
   5  -8  21    4.32    0.22 
   5   8  21    3.62    0.21 
   5  -8  19   17.62    0.47 
   5  -8  19   17.46    0.43 
   5   8  19   17.33    0.43 
   5  -8  17    0.04    0.07 
   5  -8  17    0.09    0.08 
   5   8  17    0.11    0.07 
   5  -8  15   20.92    0.50 
   5   8  15   21.76    0.48 
   5  -8  13   16.94    0.43 
   5   8  13   16.06    0.39 
   5  -8  11    8.22    0.29 
   5   8  11    8.38    0.26 
   5  -8   9   39.54    0.73 
   5   8   9   38.81    0.68 
   5  -8   7    3.45    0.18 
   5   8   7    3.22    0.16 
   5  -8   5   32.25    0.62 
   5   8   5   32.08    0.57 
   5  -8   3   25.48    0.52 
  -5   8  -3   26.00    0.45 
   5  -8   1    0.30    0.07 
  -5   8  -1    0.16    0.05 
  -5  -8   1   23.57    0.43 
   5  -8  -1   24.01    0.48 
  -5   8   1   23.27    0.44 
  -5  -8   3    6.12    0.21 
   5  -8  -3    5.95    0.21 
  -5  -8   3    6.57    0.19 
  -5   8   3    6.18    0.20 
  -5  -8   5    7.72    0.20 
   5  -8  -5    7.48    0.23 
  -5  -8   5    7.22    0.23 
  -5   8   5    7.20    0.23 
   5  -8  -7    7.10    0.22 
  -5  -8   7    7.33    0.23 
  -5   8   7    7.51    0.24 
   5  -8  -9    1.52    0.12 
  -5  -8   9    1.13    0.11 
  -5   8   9    1.49    0.12 
  -5  -8  11    4.58    0.19 
  -5   8  11    4.62    0.20 
  -5  -8  13   -0.02    0.06 
  -5   8  13    0.05    0.06 
  -5  -8  15    3.12    0.18 
  -5   8  15    2.85    0.17 
  -5  -8  17    0.58    0.10 
  -5   8  17    0.58    0.10 
  -5  -8  19    0.79    0.11 
  -5   8  19    0.81    0.11 
  -5  -8  21    0.83    0.12 
  -5   8  21    0.59    0.10 
  -5  -8  23    0.40    0.10 
  -5   8  23    0.28    0.09 
  -5  -8  25    0.50    0.12 
  -5   8  25    0.49    0.11 
  -5  -8  27    0.07    0.09 
  -5   8  27    0.03    0.08 
  -5  -8  29    0.49    0.16 
   5  -9  24    2.66    0.22 
   5  -9  22    0.79    0.13 
   5   9  22    0.84    0.13 
   5  -9  20    0.45    0.11 
   5   9  20    0.54    0.11 
   5  -9  18    1.03    0.14 
   5   9  18    0.97    0.13 
   5  -9  16    0.26    0.10 
   5   9  16    0.48    0.10 
   5  -9  14    0.66    0.12 
   5   9  14    0.50    0.09 
   5  -9  12   -0.07    0.06 
   5   9  12   -0.05    0.06 
   5  -9  10    0.20    0.08 
   5   9  10    0.33    0.08 
   5  -9   8    5.63    0.25 
   5   9   8    5.29    0.21 
   5  -9   6    2.47    0.17 
   5   9   6    2.10    0.14 
   5  -9   4   -0.12    0.06 
   5  -9   2   27.48    0.56 
  -5  -9  -2   26.90    0.51 
  -5  -9   0    6.59    0.21 
   5  -9   0    6.56    0.24 
  -5   9   0    6.62    0.21 
  -5  -9   2    8.89    0.24 
  -5  -9   2    9.01    0.27 
   5  -9  -2    8.76    0.28 
  -5   9   2    8.82    0.25 
   5  -9  -4   52.76    0.88 
  -5  -9   4   54.37    0.87 
  -5   9   4   52.61    0.86 
   5  -9  -6    0.25    0.07 
  -5  -9   6    0.25    0.07 
  -5   9   6    0.27    0.07 
   5  -9  -8   21.56    0.45 
  -5  -9   8   22.11    0.47 
  -5   9   8   21.94    0.47 
  -5  -9  10   42.16    0.74 
  -5   9  10   41.79    0.75 
  -5  -9  12    2.49    0.16 
  -5   9  12    2.46    0.16 
  -5  -9  14   30.46    0.61 
  -5   9  14   30.28    0.61 
  -5  -9  16   12.48    0.36 
  -5   9  16   12.78    0.36 
  -5  -9  18   24.57    0.55 
  -5   9  18   24.65    0.55 
  -5  -9  20   24.00    0.55 
  -5   9  20   22.78    0.54 
  -5  -9  22    0.32    0.10 
  -5   9  22    0.38    0.09 
  -5  -9  24   29.30    0.66 
  -5   9  24   29.70    0.65 
  -5  -9  26    2.16    0.21 
   5 -10  19    0.86    0.15 
   5 -10  17    0.58    0.12 
   5  10  17    0.67    0.11 
   5 -10  15    0.06    0.09 
   5  10  15    0.10    0.08 
   5 -10  13    0.09    0.10 
   5  10  13    0.24    0.09 
   5 -10  11   -0.10    0.08 
   5  10  11    0.11    0.07 
   5 -10   9   -0.03    0.08 
   5 -10   7    0.17    0.09 
  -5 -10  -5    0.47    0.08 
   5 -10   5    0.30    0.09 
   5 -10   3   -0.01    0.07 
  -5 -10  -3    0.06    0.06 
  -5 -10  -1    0.32    0.07 
  -5 -10  -1    0.26    0.07 
   5 -10   1    0.39    0.09 
   5 -10  -1   -0.09    0.06 
  -5 -10   1   -0.03    0.05 
   5 -10  -3    0.64    0.10 
  -5 -10   3    0.91    0.11 
  -5  10   3    0.99    0.11 
   5 -10  -5    2.63    0.17 
  -5 -10   5    2.60    0.16 
  -5  10   5    2.84    0.16 
  -5 -10   7    0.00    0.07 
  -5  10   7    0.07    0.06 
  -5 -10   9    2.03    0.16 
  -5  10   9    1.94    0.15 
  -5 -10  11    0.37    0.09 
  -5  10  11    0.30    0.08 
  -5 -10  13    0.04    0.07 
  -5  10  13    0.11    0.08 
  -5 -10  15    0.37    0.10 
  -5  10  15    0.23    0.08 
  -5 -10  17   -0.07    0.07 
  -5  10  17   -0.03    0.07 
  -5 -10  19    0.66    0.13 
  -5  10  19    0.65    0.12 
  -5 -10  21    0.03    0.09 
  -5  10  21    0.07    0.07 
  -5 -10  23    0.42    0.12 
   5 -11  14   -0.18    0.08 
   5 -11  12   -0.09    0.09 
  -5 -11 -10    1.02    0.13 
   5 -11  10    1.13    0.15 
  -5 -11  -8    2.06    0.16 
   5 -11   8    2.21    0.20 
   5 -11   6    3.89    0.24 
  -5 -11  -6    4.11    0.21 
  -5 -11  -4    2.54    0.17 
   5 -11   4    2.49    0.20 
   5 -11   2    9.93    0.34 
  -5 -11   0    5.99    0.26 
   5 -11   0    6.22    0.27 
   5 -11  -2    0.34    0.10 
  -5 -11   2    0.61    0.11 
  -5 -11   4   19.34    0.64 
  -5 -11   6    0.23    0.08 
  -5  11   6    0.13    0.07 
  -5 -11   8   14.73    0.40 
  -5  11   8   14.16    0.39 
  -5 -11  10   22.96    0.53 
  -5  11  10   23.39    0.54 
  -5 -11  12    2.39    0.18 
  -5  11  12    2.44    0.18 
  -5 -11  14   20.03    0.50 
  -5  11  14   19.83    0.50 
  -5 -11  16    6.70    0.29 
  -5  11  16    6.49    0.29 
  -5 -11  18   17.86    0.49 
  -5 -11  20   19.71    0.59 
  -5 -12  -9   11.43    0.37 
  -5 -12  -7    3.48    0.21 
   5 -12   7    3.84    0.26 
   5 -12   5    1.36    0.17 
   5 -12   3    6.00    0.29 
   5 -12   1   -0.08    0.08 
   5 -12  -1    4.50    0.26 
  -5 -12   3    1.64    0.17 
  -5 -12   5    1.11    0.15 
  -5 -12   7    4.73    0.26 
  -5 -12   9    0.35    0.11 
  -5  12   9    0.21    0.09 
  -5  12  11    2.07    0.18 
   6   0  36    2.19    0.21 
   6   0  34    0.31    0.10 
   6   0  32   15.21    0.43 
   6   0  30    2.86    0.19 
   6   0  28    0.94    0.13 
   6   0  26   41.64    0.76 
   6   0  24   76.03    1.18 
  -6   0 -22   17.48    0.33 
   6   0  22   17.35    0.40 
  -6   0 -20   13.98    0.28 
   6   0  20   13.76    0.33 
   6   0  18  121.91    1.70 
  -6   0 -18  122.38    1.62 
   6   0  18  123.57    1.61 
   6   0  16   18.10    0.37 
   6   0  16   17.89    0.30 
  -6   0 -16   18.17    0.32 
   6   0  14    2.82    0.12 
  -6   0 -14    2.83    0.10 
   6   0  14    3.51    0.10 
   6   0  12  371.61    4.99 
  -6   0 -12  370.60    4.97 
   6   0  12  385.68    5.29 
  -6   0 -10    3.85    0.10 
   6   0  10    2.97    0.11 
   6   0  10    3.18    0.10 
  -6   0  -8   16.92    0.27 
   6   0   8   16.42    0.29 
   6   0   8   16.53    0.27 
   6   0   6  445.94    6.07 
   6   0   6  457.12    6.00 
  -6   0  -6  461.44    6.00 
   6   0   4  229.45    3.14 
   6   0   4  221.89    3.03 
  -6   0  -2   62.39    0.84 
  -6   0   0  190.01    2.52 
  -6   0   2  209.18    2.88 
  -6   0   4   93.33    1.31 
  -6   0   4   90.08    1.19 
  -6   0   6  121.25    1.68 
  -6   0   6  120.27    1.66 
  -6   0   8  461.32    6.08 
  -6   0   8  460.34    6.14 
  -6   0  10    6.43    0.15 
  -6   0  10    6.33    0.14 
  -6   0  12    0.30    0.03 
  -6   0  12    0.22    0.04 
  -6   0  14  256.45    3.39 
  -6   0  14  248.35    3.27 
  -6   0  16    0.25    0.04 
  -6   0  16    0.26    0.05 
  -6   0  18    0.11    0.05 
  -6   0  18    0.16    0.04 
  -6   0  20  117.20    1.64 
  -6   0  20  117.63    1.56 
  -6   0  22    5.88    0.21 
  -6   0  22    5.97    0.16 
  -6   0  24    1.52    0.14 
  -6   0  24    1.89    0.10 
  -6   0  26   38.46    0.71 
  -6   0  28   13.19    0.37 
  -6   0  30    1.51    0.15 
  -6   0  32    8.56    0.32 
  -6   0  34    1.39    0.16 
  -6   0  36    1.05    0.16 
  -6   0  38    8.34    0.39 
   6  -1  35    1.75    0.18 
   6   1  35    1.90    0.19 
   6  -1  33    0.19    0.10 
   6   1  33    0.17    0.10 
   6  -1  31    2.74    0.20 
   6   1  31    2.46    0.18 
   6  -1  29    1.59    0.16 
   6   1  29    1.41    0.15 
   6  -1  27    0.83    0.11 
   6   1  27    0.74    0.11 
   6  -1  25    4.15    0.20 
  -6  -1 -25    4.42    0.16 
   6   1  25    4.24    0.20 
   6  -1  23    0.05    0.06 
  -6  -1 -23    0.04    0.04 
   6   1  23    0.07    0.05 
  -6  -1 -21    1.17    0.09 
   6  -1  21    0.92    0.08 
   6  -1  21    1.16    0.12 
   6   1  21    0.91    0.10 
  -6   1 -21    1.15    0.09 
  -6  -1 -19    3.77    0.14 
   6  -1  19    3.78    0.17 
   6  -1  19    3.75    0.13 
   6   1  19    3.66    0.16 
  -6   1 -19    3.85    0.12 
   6  -1  17    2.10    0.10 
   6  -1  17    1.71    0.12 
  -6  -1 -17    1.95    0.09 
   6   1  17    1.86    0.12 
  -6   1 -17    2.03    0.08 
   6   1  17    1.92    0.07 
   6  -1  15    4.04    0.15 
  -6  -1 -15    3.94    0.13 
   6  -1  15    3.94    0.13 
   6   1  15    3.97    0.15 
  -6   1 -15    3.78    0.11 
   6   1  15    4.00    0.10 
   6  -1  13    2.70    0.10 
  -6  -1 -13    2.63    0.10 
   6   1  13    2.74    0.12 
   6   1  13    2.61    0.08 
  -6   1 -13    2.64    0.09 
   6  -1  11    0.16    0.03 
  -6  -1 -11    0.15    0.03 
   6  -1  11    0.13    0.04 
   6   1  11    0.15    0.04 
  -6   1 -11    0.15    0.03 
   6  -1   9    0.09    0.04 
  -6  -1  -9   -0.09    0.02 
   6  -1   9   -0.04    0.03 
   6   1   9   -0.06    0.03 
  -6   1  -9    0.00    0.03 
   6  -1   7    1.57    0.07 
   6  -1   7    1.60    0.07 
  -6  -1  -7    1.54    0.07 
  -6   1  -7    1.58    0.06 
   6   1   7    1.68    0.07 
  -6  -1  -5   -0.09    0.02 
   6  -1   5   -0.09    0.02 
   6  -1   5   -0.02    0.03 
  -6   1  -5   -0.05    0.02 
   6  -1   3    2.90    0.07 
  -6  -1  -3    2.90    0.08 
   6  -1   3    3.02    0.09 
  -6   1  -3    2.83    0.08 
   6  -1   1    1.50    0.07 
  -6   1  -1    1.39    0.06 
  -6  -1   1    5.44    0.12 
   6  -1  -1    5.49    0.14 
  -6   1   1    5.42    0.12 
  -6  -1   3    0.10    0.02 
  -6   1   3    0.11    0.03 
  -6   1   3    0.15    0.02 
  -6  -1   5    5.33    0.12 
  -6  -1   5    5.38    0.11 
  -6   1   5    5.38    0.10 
  -6   1   5    5.44    0.12 
  -6  -1   7    9.47    0.19 
  -6  -1   7    9.66    0.17 
  -6   1   7    9.60    0.17 
  -6   1   7    9.58    0.18 
  -6  -1   9    0.05    0.03 
  -6  -1   9    0.06    0.02 
  -6   1   9    0.11    0.03 
  -6   1   9    0.06    0.02 
  -6  -1  11    5.88    0.13 
  -6  -1  11    5.99    0.15 
  -6   1  11    5.89    0.14 
  -6   1  11    6.01    0.15 
  -6  -1  13    1.30    0.06 
  -6   1  13    1.20    0.08 
  -6   1  13    1.36    0.07 
  -6  -1  15    9.14    0.22 
  -6  -1  15    9.05    0.17 
  -6   1  15    8.73    0.21 
  -6   1  15    8.53    0.19 
  -6  -1  17    5.87    0.13 
  -6   1  17    5.73    0.18 
  -6   1  17    5.60    0.15 
  -6  -1  19    0.25    0.06 
  -6  -1  19    0.12    0.03 
  -6   1  19    0.13    0.06 
  -6   1  19    0.16    0.04 
  -6  -1  21   15.28    0.27 
  -6  -1  21   15.58    0.36 
  -6   1  21   15.79    0.35 
  -6   1  21   15.81    0.31 
  -6  -1  23    5.55    0.16 
  -6  -1  23    5.28    0.21 
  -6   1  23    5.39    0.20 
  -6   1  23    5.63    0.17 
  -6  -1  25    0.74    0.10 
  -6   1  25    0.76    0.08 
  -6   1  25    0.81    0.10 
  -6  -1  27    7.59    0.27 
  -6   1  27    8.14    0.27 
  -6   1  27    7.74    0.21 
  -6  -1  29    0.46    0.10 
  -6   1  29    0.49    0.10 
  -6  -1  31    3.51    0.21 
  -6   1  31    3.62    0.21 
  -6  -1  33    3.67    0.23 
  -6   1  33    3.80    0.22 
  -6  -1  35    0.12    0.10 
  -6   1  35    0.17    0.10 
  -6  -1  37    3.56    0.24 
  -6   1  37    3.34    0.22 
   6  -2  36    2.80    0.34 
   6  -2  34    0.69    0.13 
   6   2  34    0.68    0.13 
   6  -2  32   12.84    0.40 
   6   2  32   12.66    0.39 
   6  -2  30    0.58    0.11 
   6   2  30    0.59    0.11 
   6  -2  28    0.15    0.08 
  -6  -2 -28    0.16    0.06 
   6   2  28    0.20    0.07 
  -6  -2 -26   37.04    0.63 
   6  -2  26   37.77    0.71 
   6   2  26   36.57    0.70 
  -6  -2 -24   37.28    0.63 
   6  -2  24   37.05    0.69 
   6   2  24   37.20    0.69 
  -6  -2 -22   14.99    0.33 
   6  -2  22   15.42    0.33 
   6  -2  22   15.83    0.38 
   6   2  22   14.80    0.37 
  -6  -2 -20   19.92    0.38 
   6  -2  20   20.58    0.38 
   6  -2  20   19.78    0.42 
   6   2  20   19.46    0.42 
   6  -2  18   79.08    1.17 
   6  -2  18   80.39    1.13 
  -6  -2 -18   79.45    1.13 
  -6   2 -18   78.27    1.06 
   6   2  18   79.75    1.17 
   6  -2  16   32.86    0.57 
   6  -2  16   33.41    0.54 
  -6  -2 -16   33.47    0.54 
  -6   2 -16   32.71    0.48 
   6   2  16   33.21    0.57 
   6  -2  14    0.36    0.05 
  -6  -2 -14    0.54    0.06 
   6  -2  14    0.53    0.07 
  -6   2 -14    0.46    0.04 
   6   2  14    0.41    0.06 
   6  -2  12  231.60    3.19 
  -6  -2 -12  230.11    3.12 
   6  -2  12  233.56    3.22 
  -6   2 -12  224.08    3.05 
   6   2  12  224.13    3.17 
  -6  -2 -10    9.01    0.20 
   6  -2  10    8.74    0.20 
   6  -2  10    8.75    0.20 
   6   2  10    9.04    0.21 
  -6   2 -10    8.72    0.16 
  -6  -2  -8   47.37    0.69 
   6  -2   8   48.80    0.68 
   6  -2   8   48.38    0.70 
  -6   2  -8   48.40    0.65 
   6  -2   6  364.34    4.87 
   6  -2   6  374.20    5.10 
  -6  -2  -6  358.72    4.84 
  -6   2  -6  357.52    4.84 
  -6  -2  -4   67.40    0.91 
   6  -2   4   65.26    0.92 
   6  -2   4   69.45    0.88 
  -6   2  -4   66.92    0.89 
   6  -2   2  301.05    4.20 
   6  -2   2  301.26    3.87 
  -6  -2  -2  292.18    4.01 
  -6   2  -2  300.94    4.03 
  -6  -2   0  143.96    2.01 
   6  -2   0  149.95    2.05 
  -6   2   0  148.01    2.06 
   6  -2  -2   65.68    0.90 
  -6   2   2   65.97    0.88 
   6  -2  -4  197.93    2.77 
  -6  -2   4  201.58    2.64 
  -6   2   4  203.25    2.83 
  -6   2   4  199.39    2.56 
  -6  -2   6   37.86    0.53 
  -6  -2   6   38.86    0.56 
  -6   2   6   39.07    0.56 
  -6   2   6   38.47    0.51 
  -6  -2   8  351.37    4.58 
  -6  -2   8  345.42    4.70 
  -6   2   8  346.45    4.72 
  -6   2   8  342.57    4.57 
  -6  -2  10   26.35    0.43 
  -6  -2  10   26.42    0.38 
  -6   2  10   26.17    0.42 
  -6   2  10   26.33    0.40 
  -6  -2  12    3.40    0.08 
  -6   2  12    3.27    0.11 
  -6   2  12    3.27    0.11 
  -6  -2  14  162.98    2.12 
  -6  -2  14  160.06    2.03 
  -6   2  14  158.03    2.09 
  -6   2  14  159.97    2.09 
  -6  -2  16    0.76    0.08 
  -6  -2  16    0.49    0.04 
  -6   2  16    0.54    0.06 
  -6   2  16    0.44    0.05 
  -6  -2  18    8.66    0.24 
  -6  -2  18    8.85    0.17 
  -6   2  18    9.22    0.22 
  -6   2  18    8.86    0.23 
  -6  -2  20   45.63    0.63 
  -6  -2  20   44.80    0.75 
  -6   2  20   45.89    0.70 
  -6   2  20   44.77    0.73 
  -6  -2  22   25.74    0.51 
  -6   2  22   25.60    0.46 
  -6   2  22   25.36    0.49 
  -6  -2  24    1.94    0.14 
  -6   2  24    1.99    0.14 
  -6   2  24    1.99    0.12 
  -6  -2  26   17.17    0.43 
  -6   2  26   17.30    0.36 
  -6   2  26   18.05    0.41 
  -6  -2  28   21.85    0.51 
  -6   2  28   20.82    0.47 
  -6   2  28   21.03    0.42 
  -6  -2  30    0.57    0.11 
  -6   2  30    0.59    0.08 
  -6   2  30    0.84    0.12 
  -6  -2  32    1.53    0.17 
  -6   2  32    1.27    0.15 
  -6  -2  34    2.72    0.22 
  -6   2  34    2.78    0.20 
  -6  -2  36    1.43    0.18 
  -6   2  36    1.75    0.18 
  -6   2  38    3.90    0.25 
   6  -3  35   18.61    0.52 
   6   3  35   19.77    0.53 
   6  -3  33    3.69    0.24 
   6   3  33    3.57    0.23 
   6  -3  31   13.29    0.41 
   6   3  31   13.20    0.40 
   6  -3  29   23.02    0.54 
  -6  -3 -29   22.17    0.47 
   6   3  29   21.29    0.52 
   6  -3  27    1.27    0.14 
  -6  -3 -27    1.29    0.12 
   6   3  27    1.40    0.15 
   6  -3  25   29.78    0.60 
   6  -3  25   29.60    0.55 
  -6  -3 -25   30.09    0.55 
   6   3  25   29.55    0.60 
   6  -3  23    5.27    0.20 
   6  -3  23    5.79    0.23 
  -6  -3 -23    5.56    0.20 
   6   3  23    5.57    0.22 
   6  -3  21    9.22    0.25 
  -6  -3 -21    8.65    0.24 
   6  -3  21    8.83    0.27 
   6   3  21    8.83    0.27 
   6  -3  19   35.94    0.61 
  -6  -3 -19   36.05    0.60 
   6  -3  19   35.44    0.63 
   6   3  19   35.43    0.63 
   6  -3  17    0.04    0.05 
   6  -3  17    0.07    0.04 
   6   3  17    0.10    0.05 
   6  -3  15   30.92    0.53 
   6  -3  15   30.48    0.53 
  -6   3 -15   30.59    0.44 
   6   3  15   32.05    0.54 
   6  -3  13   12.96    0.28 
   6  -3  13   13.19    0.28 
   6   3  13   13.18    0.29 
  -6   3 -13   12.82    0.21 
   6  -3  11    2.57    0.11 
   6  -3  11    2.68    0.12 
  -6   3 -11    2.51    0.07 
   6  -3   9   30.93    0.49 
  -6  -3  -9   32.21    0.51 
   6  -3   9   32.49    0.52 
  -6   3  -9   31.32    0.45 
   6  -3   7    5.49    0.16 
   6  -3   7    5.43    0.13 
  -6  -3  -7    5.88    0.15 
  -6   3  -7    5.72    0.12 
  -6  -3  -5    2.50    0.09 
   6  -3   5    2.42    0.08 
  -6   3  -5    2.55    0.08 
   6  -3   3    7.72    0.14 
  -6  -3  -3    7.98    0.17 
   6  -3   3    7.89    0.19 
  -6   3  -3    7.79    0.16 
  -6  -3  -1   11.82    0.22 
   6  -3   1   12.21    0.17 
   6  -3   1   12.19    0.24 
  -6   3  -1   11.62    0.21 
  -6  -3   1   13.59    0.24 
   6  -3  -1   13.30    0.25 
  -6   3   1   13.66    0.24 
   6  -3  -3    2.42    0.10 
  -6  -3   3    2.58    0.08 
  -6  -3   5   10.30    0.21 
  -6  -3   5   10.19    0.18 
   6  -3  -5   10.15    0.21 
   6  -3  -7   38.79    0.57 
  -6  -3   7   38.50    0.53 
  -6  -3   7   38.54    0.58 
  -6   3   7   38.85    0.57 
  -6   3   7   37.63    0.51 
  -6  -3   9    0.11    0.04 
  -6  -3   9    0.10    0.02 
  -6   3   9    0.22    0.04 
  -6  -3  11   41.16    0.55 
  -6  -3  11   41.06    0.63 
  -6   3  11   40.15    0.62 
  -6   3  11   40.67    0.58 
  -6  -3  13   16.69    0.25 
  -6  -3  13   16.63    0.33 
  -6   3  13   16.39    0.30 
  -6   3  13   17.00    0.32 
  -6  -3  15   14.29    0.22 
  -6  -3  15   14.21    0.31 
  -6   3  15   14.37    0.29 
  -6   3  15   14.16    0.28 
  -6  -3  17   34.48    0.47 
  -6  -3  17   34.60    0.60 
  -6   3  17   34.57    0.57 
  -6   3  17   35.16    0.56 
  -6  -3  19    0.65    0.09 
  -6   3  19    0.66    0.07 
  -6   3  19    0.68    0.07 
  -6  -3  21   34.66    0.63 
  -6   3  21   34.59    0.60 
  -6   3  21   34.98    0.59 
  -6  -3  23   21.65    0.47 
  -6   3  23   21.23    0.44 
  -6   3  23   21.88    0.43 
  -6  -3  25    9.37    0.30 
  -6   3  25    9.49    0.28 
  -6   3  25    9.23    0.26 
  -6  -3  27   33.86    0.67 
  -6   3  27   33.30    0.63 
  -6   3  27   33.84    0.60 
  -6  -3  29    1.54    0.16 
  -6   3  29    1.35    0.12 
  -6   3  29    1.39    0.14 
  -6  -3  31   27.98    0.63 
  -6   3  31   27.98    0.59 
  -6   3  31   27.69    0.54 
  -6  -3  33   18.39    0.50 
  -6   3  33   18.35    0.47 
  -6  -3  35    1.36    0.17 
  -6   3  35    1.51    0.16 
  -6   3  37   26.81    0.63 
   6  -4  34    1.04    0.15 
   6   4  34    1.20    0.16 
   6  -4  32    4.54    0.25 
  -6  -4 -32    3.96    0.22 
   6   4  32    4.47    0.24 
  -6  -4 -30    0.07    0.06 
   6  -4  30   -0.03    0.08 
   6   4  30    0.11    0.08 
   6  -4  28    2.93    0.19 
  -6  -4 -28    2.82    0.16 
   6   4  28    2.84    0.19 
   6  -4  26   11.41    0.32 
  -6  -4 -26   11.53    0.32 
   6  -4  26   11.74    0.35 
   6   4  26   11.47    0.35 
   6  -4  24   11.16    0.31 
  -6  -4 -24   11.74    0.31 
   6  -4  24   11.49    0.34 
   6   4  24   12.14    0.34 
   6  -4  22    0.34    0.08 
   6  -4  22   -0.02    0.05 
   6   4  22    0.07    0.05 
   6  -4  20    9.62    0.28 
   6  -4  20    9.77    0.28 
   6   4  20   10.09    0.29 
   6  -4  18   24.62    0.48 
   6  -4  18   24.36    0.48 
   6   4  18   24.72    0.49 
   6   4  18   24.36    0.46 
   6  -4  16    0.22    0.06 
   6  -4  16    0.19    0.06 
   6   4  16    0.27    0.06 
   6  -4  14   11.89    0.28 
   6  -4  14   11.51    0.29 
   6   4  14   12.10    0.28 
   6  -4  12   49.24    0.74 
   6  -4  12   49.43    0.77 
  -6   4 -12   48.00    0.66 
   6   4  12   49.33    0.75 
   6  -4  10    3.08    0.13 
   6  -4  10    3.24    0.12 
   6   4  10    3.13    0.13 
  -6   4 -10    3.08    0.09 
   6  -4   8    1.98    0.11 
   6  -4   8    2.18    0.09 
  -6   4  -8    2.06    0.07 
  -6  -4  -6  105.75    1.42 
   6  -4   6  104.33    1.44 
   6  -4   6  105.11    1.38 
  -6   4  -6  105.72    1.37 
  -6  -4  -4   27.53    0.44 
   6  -4   4   26.70    0.39 
   6  -4   4   26.82    0.46 
  -6   4  -4   26.10    0.40 
  -6  -4  -2    6.45    0.16 
   6  -4   2    6.58    0.18 
   6  -4   2    6.53    0.12 
  -6   4  -2    6.49    0.15 
   6  -4   0   37.99    0.50 
  -6  -4   0   38.18    0.56 
  -6   4   0   37.73    0.56 
   6  -4  -2   14.18    0.28 
   6  -4  -2   14.32    0.19 
  -6  -4   2   14.14    0.25 
  -6   4   2   13.67    0.26 
  -6  -4   4    2.74    0.09 
   6  -4  -4    2.62    0.11 
  -6   4   4    2.69    0.10 
   6  -4  -6    6.96    0.17 
  -6  -4   6    6.82    0.18 
  -6  -4   6    6.81    0.14 
  -6   4   6    6.96    0.17 
  -6  -4   8  123.64    1.60 
  -6  -4   8  122.67    1.67 
   6  -4  -8  125.33    1.65 
  -6   4   8  126.52    1.66 
   6  -4 -10    1.23    0.08 
  -6  -4  10    1.16    0.05 
  -6  -4  10    1.22    0.09 
  -6   4  10    1.16    0.06 
  -6   4  10    1.06    0.08 
  -6  -4  12    2.77    0.08 
  -6  -4  12    2.96    0.13 
  -6   4  12    2.93    0.12 
  -6   4  12    2.74    0.09 
  -6  -4  14   43.25    0.70 
  -6  -4  14   43.68    0.58 
  -6   4  14   43.84    0.64 
  -6   4  14   42.41    0.68 
  -6  -4  16    2.98    0.14 
  -6   4  16    2.77    0.13 
  -6   4  16    2.99    0.12 
  -6  -4  18    0.39    0.07 
  -6   4  18    0.47    0.07 
  -6   4  18    0.57    0.07 
  -6  -4  20    8.82    0.27 
  -6   4  20    8.88    0.23 
  -6   4  20    8.26    0.24 
  -6  -4  22   11.86    0.33 
  -6   4  22   11.73    0.29 
  -6   4  22   11.74    0.30 
  -6  -4  24    1.41    0.14 
  -6   4  24    1.44    0.12 
  -6   4  24    1.35    0.12 
  -6  -4  26   13.47    0.38 
  -6   4  26   14.17    0.35 
  -6   4  26   13.68    0.35 
  -6  -4  28    2.80    0.20 
  -6   4  28    2.86    0.17 
  -6   4  28    2.66    0.16 
  -6  -4  30    5.44    0.27 
  -6   4  30    5.42    0.23 
  -6   4  30    5.31    0.22 
  -6  -4  32    0.44    0.12 
  -6   4  32    0.55    0.11 
  -6   4  32    0.51    0.10 
  -6  -4  34    0.31    0.11 
  -6   4  34    0.38    0.10 
   6  -5  33    2.40    0.21 
  -6  -5 -33    1.89    0.16 
   6   5  33    1.73    0.18 
  -6  -5 -31   25.66    0.56 
   6  -5  31   26.00    0.61 
   6   5  31   25.19    0.60 
   6  -5  29   17.53    0.47 
  -6  -5 -29   17.76    0.44 
   6   5  29   17.44    0.46 
   6  -5  27    6.30    0.27 
  -6  -5 -27    5.87    0.24 
   6  -5  27    6.19    0.25 
   6   5  27    6.52    0.27 
  -6  -5 -25   42.05    0.75 
   6  -5  25   41.99    0.76 
   6  -5  25   42.09    0.77 
   6   5  25   41.17    0.77 
   6  -5  23    1.98    0.15 
   6  -5  23    1.82    0.14 
   6  -5  21   13.24    0.35 
   6  -5  21   13.18    0.34 
   6  -5  19   36.15    0.64 
   6  -5  19   34.56    0.65 
   6   5  19   35.69    0.63 
   6  -5  17    0.10    0.06 
   6  -5  17    0.05    0.05 
   6   5  17    0.10    0.05 
   6  -5  15    7.53    0.24 
   6  -5  15    7.56    0.22 
   6   5  15    7.63    0.23 
   6  -5  13    1.21    0.11 
   6  -5  13    1.23    0.10 
   6   5  13    1.07    0.10 
   6  -5  11   12.14    0.30 
   6  -5  11   12.28    0.27 
   6   5  11   12.68    0.29 
   6  -5   9    1.75    0.09 
   6  -5   9    2.06    0.12 
   6   5   9    1.74    0.10 
  -6   5  -9    1.67    0.07 
   6  -5   7    0.51    0.07 
   6  -5   7    0.51    0.05 
  -6   5  -7    0.50    0.05 
   6   5   7    0.46    0.06 
   6  -5   5    0.15    0.04 
   6  -5   5    0.15    0.05 
  -6   5  -5    0.14    0.03 
   6  -5   3    4.97    0.11 
  -6  -5  -3    5.10    0.15 
   6  -5   3    4.96    0.17 
  -6   5  -3    4.87    0.13 
   6  -5   1    1.12    0.05 
   6  -5   1    1.16    0.09 
  -6  -5  -1    1.08    0.07 
  -6   5  -1    1.23    0.07 
   6  -5  -1   20.73    0.30 
   6  -5  -1   21.15    0.39 
  -6  -5   1   20.85    0.35 
  -6   5   1   21.00    0.36 
  -6  -5   3    3.70    0.11 
   6  -5  -3    3.54    0.13 
   6  -5  -3    3.79    0.08 
  -6   5   3    3.61    0.13 
  -6  -5   5    2.93    0.12 
   6  -5  -5    3.17    0.12 
  -6  -5   5    3.23    0.10 
  -6   5   5    2.91    0.12 
  -6  -5   7   26.25    0.40 
  -6  -5   7   26.55    0.46 
   6  -5  -7   26.81    0.45 
  -6   5   7   27.33    0.46 
   6  -5  -9    7.99    0.20 
  -6  -5   9    8.18    0.16 
  -6  -5   9    8.25    0.22 
  -6   5   9    8.14    0.21 
   6  -5 -11   78.26    1.08 
  -6  -5  11   78.55    1.01 
  -6  -5  11   76.42    1.12 
  -6   5  11   75.85    1.11 
  -6  -5  13   14.39    0.32 
  -6   5  13   13.83    0.31 
  -6  -5  15   56.06    0.88 
  -6   5  15   57.25    0.87 
  -6   5  15   55.53    0.81 
  -6  -5  17   64.10    0.99 
  -6   5  17   63.65    0.92 
  -6   5  17   62.94    0.97 
  -6  -5  19    0.33    0.07 
  -6   5  19    0.32    0.07 
  -6   5  19    0.41    0.06 
  -6  -5  21   70.33    1.11 
  -6   5  21   68.75    1.04 
  -6   5  21   72.08    1.09 
  -6  -5  23   30.69    0.62 
  -6   5  23   30.59    0.58 
  -6  -5  25   19.42    0.47 
  -6   5  25   18.58    0.43 
  -6  -5  27   63.35    1.08 
  -6   5  27   63.49    1.02 
  -6  -5  29    4.11    0.24 
  -6   5  29    4.24    0.20 
  -6  -5  31   28.76    0.66 
  -6   5  31   28.54    0.59 
  -6  -5  33   21.61    0.58 
  -6   5  33   21.52    0.50 
  -6   5  35    1.42    0.15 
  -6  -6 -32   -0.06    0.06 
   6  -6  32    0.11    0.10 
   6  -6  30   -0.03    0.08 
  -6  -6 -30    0.07    0.08 
   6  -6  28    8.07    0.31 
   6  -6  28    7.93    0.31 
  -6  -6 -28    8.01    0.29 
   6  -6  26    0.95    0.13 
  -6  -6 -26    0.84    0.12 
   6  -6  26    0.95    0.13 
   6  -6  24    0.60    0.10 
   6  -6  24    0.64    0.11 
   6  -6  22    9.12    0.29 
   6  -6  22    8.36    0.29 
   6  -6  20    1.63    0.14 
   6  -6  20    1.68    0.15 
   6   6  20    1.71    0.14 
   6  -6  18    1.10    0.11 
   6  -6  18    0.94    0.11 
   6   6  18    1.17    0.12 
   6  -6  16   16.68    0.37 
   6  -6  16   17.09    0.41 
   6   6  16   17.59    0.39 
   6  -6  14    3.00    0.14 
   6  -6  14    2.90    0.17 
   6   6  14    2.89    0.15 
   6  -6  12    1.85    0.11 
   6  -6  12    2.15    0.15 
   6   6  12    2.01    0.12 
   6  -6  10   10.00    0.28 
   6  -6  10   10.01    0.23 
   6   6  10    9.79    0.26 
   6  -6   8   19.29    0.34 
   6  -6   8   18.94    0.41 
  -6   6  -8   18.95    0.32 
   6   6   8   18.49    0.38 
   6  -6   6    0.25    0.05 
   6  -6   6    0.20    0.06 
  -6   6  -6    0.21    0.04 
   6  -6   4    8.83    0.18 
   6  -6   4    8.58    0.24 
  -6   6  -4    8.72    0.20 
   6  -6   2   19.98    0.40 
  -6  -6  -2   19.92    0.37 
   6  -6   2   20.17    0.31 
  -6   6  -2   20.21    0.36 
   6  -6   0    0.18    0.05 
  -6  -6   0    0.18    0.05 
   6  -6   0    0.13    0.03 
  -6   6   0    0.17    0.04 
   6  -6  -2    0.68    0.04 
  -6  -6   2    0.76    0.07 
   6  -6  -2    0.71    0.08 
  -6   6   2    0.84    0.08 
   6  -6  -4   26.33    0.38 
  -6  -6   4   26.91    0.43 
   6  -6  -4   26.36    0.47 
  -6   6   4   26.65    0.46 
  -6  -6   6    2.42    0.09 
  -6  -6   6    2.43    0.12 
   6  -6  -6    2.44    0.12 
  -6   6   6    2.34    0.12 
   6  -6  -8    0.61    0.07 
  -6  -6   8    0.75    0.06 
  -6   6   8    0.67    0.08 
  -6  -6  10   14.99    0.25 
  -6  -6  10   14.60    0.33 
   6  -6 -10   15.36    0.31 
  -6   6  10   15.01    0.33 
  -6  -6  12    6.85    0.22 
   6  -6 -12    6.91    0.19 
  -6   6  12    6.34    0.21 
  -6  -6  14    3.86    0.17 
  -6   6  14    3.99    0.17 
  -6  -6  16    8.48    0.26 
  -6   6  16    9.07    0.26 
  -6  -6  18    2.89    0.17 
  -6   6  18    3.29    0.16 
  -6  -6  20    1.54    0.14 
  -6   6  20    1.66    0.13 
  -6  -6  22    7.22    0.27 
  -6   6  22    8.16    0.27 
  -6  -6  24    4.99    0.23 
  -6   6  24    4.95    0.21 
  -6  -6  26    0.74    0.12 
  -6   6  26    0.51    0.10 
  -6  -6  28    2.10    0.19 
  -6   6  28    2.45    0.17 
  -6  -6  30    2.56    0.22 
  -6   6  30    2.83    0.19 
  -6  -6  32   -0.04    0.10 
  -6   6  32   -0.07    0.06 
  -6   6  34    1.43    0.16 
   6  -7  31   13.36    0.43 
   6  -7  29   12.46    0.40 
  -6  -7 -29   11.93    0.38 
   6  -7  29   11.98    0.40 
   6  -7  27    2.06    0.19 
   6  -7  27    2.01    0.19 
  -6  -7 -27    2.19    0.17 
   6  -7  25   19.86    0.49 
   6  -7  25   21.05    0.52 
   6  -7  23    3.12    0.20 
   6  -7  23    3.46    0.20 
   6  -7  21    7.42    0.29 
   6  -7  21    7.85    0.27 
   6   7  21    8.07    0.28 
   6  -7  19   17.54    0.41 
   6  -7  19   17.64    0.45 
   6   7  19   17.99    0.43 
   6  -7  17    0.19    0.07 
   6  -7  17    0.11    0.07 
   6   7  17    0.07    0.06 
   6  -7  15   14.03    0.33 
   6  -7  15   14.09    0.38 
   6   7  15   14.08    0.35 
   6  -7  13    3.87    0.16 
   6  -7  13    3.75    0.19 
   6   7  13    4.03    0.18 
   6  -7  11    6.67    0.20 
   6  -7  11    7.03    0.25 
   6   7  11    6.41    0.22 
   6  -7   9    6.27    0.23 
   6  -7   9    6.27    0.18 
   6   7   9    6.21    0.21 
   6  -7   7    0.10    0.04 
   6  -7   7    0.05    0.05 
   6   7   7    0.08    0.05 
   6  -7   5    0.71    0.09 
  -6   7  -5    0.89    0.07 
   6  -7   3    0.20    0.07 
  -6  -7  -3    0.38    0.06 
  -6   7  -3    0.37    0.05 
  -6  -7  -1    0.06    0.04 
   6  -7   1    0.07    0.06 
  -6   7  -1    0.10    0.04 
   6  -7  -1    0.32    0.07 
  -6  -7   1    0.44    0.06 
  -6   7   1    0.59    0.07 
   6  -7  -3    0.96    0.10 
  -6  -7   3    0.91    0.08 
  -6   7   3    0.93    0.09 
  -6  -7   5    0.67    0.08 
  -6  -7   5    0.65    0.06 
   6  -7  -5    0.60    0.08 
  -6   7   5    0.76    0.08 
   6  -7  -7   11.55    0.28 
  -6  -7   7   11.34    0.23 
  -6  -7   7   11.41    0.29 
  -6   7   7   11.01    0.28 
  -6  -7   9    0.20    0.06 
   6  -7  -9    0.13    0.05 
  -6   7   9    0.14    0.05 
  -6  -7  11   28.57    0.54 
   6  -7 -11   28.66    0.50 
  -6   7  11   28.96    0.54 
  -6  -7  13    9.75    0.28 
  -6   7  13    9.84    0.28 
  -6  -7  15    7.57    0.25 
  -6   7  15    7.67    0.25 
  -6  -7  17   23.11    0.49 
  -6   7  17   22.05    0.48 
  -6  -7  19    0.91    0.11 
  -6   7  19    0.99    0.11 
  -6  -7  21   23.47    0.53 
  -6   7  21   23.08    0.51 
  -6  -7  23   17.41    0.46 
  -6   7  23   17.20    0.43 
  -6  -7  25    4.44    0.24 
  -6   7  25    4.94    0.23 
  -6  -7  27   27.07    0.62 
  -6   7  27   27.18    0.59 
  -6  -7  29    2.51    0.22 
  -6   7  29    2.24    0.18 
  -6   7  31   13.65    0.41 
   6  -8  28    9.18    0.36 
   6  -8  26    0.82    0.14 
  -6  -8 -26    0.79    0.12 
   6  -8  24    0.05    0.08 
   6  -8  22   16.77    0.47 
   6  -8  20    0.03    0.08 
   6  -8  18   12.90    0.39 
   6   8  18   13.20    0.37 
   6  -8  16   32.73    0.67 
   6   8  16   32.29    0.64 
   6  -8  14    6.75    0.27 
   6   8  14    6.93    0.25 
   6  -8  12   30.31    0.62 
   6   8  12   30.78    0.59 
   6  -8  10   16.55    0.42 
   6   8  10   16.70    0.39 
   6  -8   8   55.85    0.94 
   6  -8   6   28.90    0.58 
   6  -8   4    1.59    0.14 
  -6  -8  -4    1.63    0.12 
   6  -8   2   88.39    1.33 
  -6  -8  -2   89.44    1.28 
  -6   8  -2   89.62    1.26 
   6  -8   0   18.74    0.42 
  -6  -8   0   18.88    0.38 
  -6   8   0   18.58    0.38 
   6  -8  -2   11.48    0.31 
  -6  -8   2   11.85    0.27 
  -6   8   2   11.39    0.28 
  -6  -8   4   78.80    1.20 
  -6  -8   4   83.07    1.15 
   6  -8  -4   81.32    1.21 
  -6   8   4   83.09    1.20 
  -6  -8   6    0.14    0.07 
  -6  -8   6    0.22    0.07 
   6  -8  -6    0.25    0.07 
  -6   8   6    0.22    0.07 
  -6  -8   8   22.40    0.46 
   6  -8  -8   22.51    0.45 
  -6   8   8   22.25    0.46 
  -6  -8  10   33.60    0.62 
   6  -8 -10   34.25    0.59 
  -6   8  10   34.24    0.63 
  -6  -8  12   15.57    0.38 
  -6   8  12   15.97    0.39 
  -6  -8  14   22.61    0.49 
  -6   8  14   21.94    0.48 
  -6  -8  16    6.80    0.26 
  -6   8  16    6.54    0.25 
  -6  -8  18   16.21    0.42 
  -6   8  18   16.19    0.41 
  -6  -8  20    6.87    0.27 
  -6   8  20    6.16    0.25 
  -6  -8  22    0.14    0.09 
  -6   8  22    0.11    0.08 
  -6  -8  24   12.87    0.40 
  -6   8  24   12.29    0.37 
  -6  -8  26   -0.05    0.07 
  -6   8  26   -0.07    0.07 
  -6  -8  28   -0.04    0.09 
  -6   8  28   -0.07    0.07 
   6  -9  23    0.06    0.09 
  -6  -9 -23   -0.03    0.07 
   6  -9  21    0.57    0.12 
   6  -9  19   -0.09    0.08 
   6  -9  17    2.02    0.18 
   6  -9  15    3.84    0.22 
   6  -9  13   -0.05    0.07 
   6  -9  11    1.06    0.14 
   6  -9   9   -0.11    0.06 
   6  -9   7    0.68    0.11 
  -6  -9  -5    0.07    0.05 
   6  -9   5    0.00    0.07 
  -6  -9  -3    2.66    0.15 
   6  -9   3    2.70    0.17 
   6  -9   1    0.57    0.10 
  -6  -9  -1    0.60    0.08 
  -6   9  -1    0.53    0.07 
   6  -9  -1    0.11    0.07 
  -6  -9   1    0.09    0.06 
  -6  -9   1    0.22    0.06 
  -6   9   1    0.20    0.06 
   6  -9  -3    0.23    0.08 
  -6  -9   3    0.14    0.05 
  -6  -9   3    0.17    0.06 
  -6   9   3    0.09    0.06 
   6  -9  -5    0.43    0.09 
  -6  -9   5    0.54    0.08 
  -6   9   5    0.52    0.08 
  -6  -9   7    6.45    0.23 
   6  -9  -7    6.12    0.22 
  -6   9   7    6.15    0.23 
  -6  -9   9    0.68    0.10 
  -6   9   9    0.65    0.09 
  -6  -9  11    4.28    0.20 
  -6   9  11    4.27    0.20 
  -6  -9  13    2.27    0.16 
  -6   9  13    2.47    0.16 
  -6  -9  15    0.19    0.08 
  -6   9  15    0.07    0.07 
  -6  -9  17    1.31    0.15 
  -6   9  17    1.30    0.14 
  -6  -9  19    0.08    0.08 
  -6   9  19    0.04    0.06 
  -6  -9  21    4.38    0.24 
  -6   9  21    4.46    0.23 
  -6  -9  23    2.69    0.21 
  -6   9  23    2.86    0.20 
  -6  -9  25    0.17    0.10 
  -6   9  25    0.30    0.15 
  -6 -10 -20    0.11    0.12 
   6 -10  20    0.03    0.14 
   6 -10  18   10.74    0.39 
  -6 -10 -18   11.08    0.36 
  -6 -10 -16   12.10    0.37 
   6 -10  16   11.91    0.41 
  -6 -10 -14    8.28    0.30 
   6 -10  14    8.16    0.33 
   6 -10  12   27.45    0.63 
  -6 -10 -12   26.73    0.58 
  -6 -10 -10    5.17    0.23 
   6 -10  10    5.14    0.26 
  -6 -10  -8   33.00    0.64 
   6 -10   8   32.47    0.69 
   6 -10   6   23.51    0.55 
  -6 -10  -6   23.97    0.51 
  -6 -10  -4    0.40    0.08 
   6 -10   4    0.30    0.09 
   6 -10   2   44.71    0.82 
  -6 -10  -2   43.49    0.75 
  -6 -10   0   12.99    0.35 
   6 -10   0   13.43    0.38 
  -6 -10   0   12.78    0.32 
   6 -10  -2   12.82    0.36 
  -6 -10   2   12.73    0.35 
  -6  10   2   13.03    0.33 
   6 -10  -4   49.79    0.86 
  -6 -10   4   49.26    0.85 
  -6  10   4   49.31    0.83 
  -6 -10   6    1.14    0.13 
   6 -10  -6    1.16    0.12 
  -6  10   6    1.14    0.12 
  -6 -10   8   11.34    0.33 
  -6  10   8   10.68    0.32 
  -6 -10  10   14.40    0.39 
  -6  10  10   14.64    0.39 
  -6 -10  12    3.93    0.21 
  -6  10  12    4.05    0.21 
  -6 -10  14   11.04    0.35 
  -6  10  14   11.12    0.35 
  -6 -10  16    3.01    0.20 
  -6  10  16    2.70    0.18 
  -6 -10  18    6.66    0.28 
  -6  10  18    6.56    0.28 
  -6 -10  20    5.35    0.27 
  -6  10  20    5.51    0.27 
  -6 -10  22    0.33    0.12 
  -6 -11 -15   -0.08    0.07 
   6 -11  13    0.07    0.10 
  -6 -11 -13    0.21    0.09 
  -6 -11 -11    0.00    0.07 
   6 -11  11    0.09    0.10 
  -6 -11  -9    0.11    0.08 
   6 -11   9    0.13    0.10 
  -6 -11  -7    0.46    0.10 
   6 -11   7    0.33    0.10 
  -6 -11  -5   -0.04    0.06 
   6 -11   5   -0.07    0.08 
   6 -11   3    1.08    0.14 
  -6 -11  -3    1.27    0.13 
  -6 -11  -1    1.31    0.13 
   6 -11   1    1.21    0.15 
   6 -11  -1    1.17    0.14 
  -6 -11   1    1.40    0.14 
   6 -11  -3    0.00    0.08 
  -6 -11   3    0.03    0.07 
  -6 -11   5    1.32    0.14 
  -6  11   5    1.40    0.14 
  -6 -11   7    0.00    0.07 
  -6  11   7   -0.09    0.06 
  -6 -11   9    0.78    0.12 
  -6  11   9    0.58    0.11 
  -6 -11  11    0.50    0.11 
  -6  11  11    0.38    0.10 
  -6 -11  13   -0.07    0.08 
  -6  11  13    0.09    0.08 
  -6 -11  15    1.56    0.16 
  -6  11  15    1.36    0.15 
  -6 -11  17    1.75    0.18 
  -6 -11  19    0.01    0.09 
  -6 -12 -10    4.61    0.27 
  -6 -12  -8    8.99    0.32 
   6 -12   6   12.81    0.43 
   6 -12   4    0.02    0.10 
   6 -12   2   18.15    0.51 
   6 -12   0    4.69    0.27 
  -6 -12   4   22.64    0.56 
  -6 -12   6    0.28    0.10 
  -6 -12   8   12.95    0.42 
  -6  12  10    6.35    0.28 
   7   0  35    0.09    0.09 
   7   0  33   -0.02    0.09 
   7   0  31   -0.07    0.07 
   7   0  29    0.08    0.07 
   7   0  27    0.03    0.07 
   7   0  25   -0.02    0.06 
  -7   0 -23    0.06    0.04 
   7   0  23    0.27    0.08 
  -7   0 -21   -0.04    0.03 
   7   0  21    0.01    0.05 
   7   0  19    0.04    0.05 
   7   0  19    0.12    0.04 
  -7   0 -19   -0.03    0.03 
   7   0  17    0.10    0.04 
   7   0  17    0.14    0.05 
  -7   0 -17    0.08    0.04 
   7   0  15    0.04    0.04 
  -7   0 -15    0.10    0.04 
   7   0  15    0.01    0.03 
  -7   0 -13    0.01    0.03 
   7   0  13    0.01    0.03 
   7   0  13    0.09    0.03 
  -7   0 -11    0.04    0.03 
   7   0  11    0.01    0.03 
   7   0  11   -0.02    0.03 
  -7   0  -9    0.07    0.03 
   7   0   9    0.06    0.03 
   7   0   9    0.08    0.03 
  -7   0  -7   -0.04    0.02 
   7   0   7   -0.04    0.03 
   7   0   7    0.02    0.03 
  -7   0  -5    0.09    0.03 
   7   0   5    0.16    0.03 
   7   0   5    0.05    0.02 
  -7   0  -3    0.13    0.03 
  -7   0  -1   -0.07    0.02 
  -7   0   1   -0.04    0.02 
  -7   0   3   -0.44    0.03 
  -7   0   5    0.01    0.02 
  -7   0   5    0.07    0.02 
  -7   0   7    0.05    0.02 
  -7   0   7    0.09    0.02 
  -7   0   9   -0.24    0.02 
  -7   0   9   -0.24    0.02 
  -7   0  11    0.03    0.03 
  -7   0  11    0.06    0.03 
  -7   0  13   -0.04    0.03 
  -7   0  13    0.00    0.03 
  -7   0  15    0.13    0.03 
  -7   0  15    0.00    0.03 
  -7   0  17    0.02    0.03 
  -7   0  17    0.09    0.04 
  -7   0  19    0.05    0.05 
  -7   0  19    0.06    0.03 
  -7   0  21    0.06    0.05 
  -7   0  21    0.06    0.03 
  -7   0  23    0.03    0.03 
  -7   0  23    0.13    0.07 
  -7   0  25    0.06    0.04 
  -7   0  25    0.09    0.06 
  -7   0  27    0.17    0.07 
  -7   0  29    0.02    0.07 
  -7   0  31    0.01    0.06 
  -7   0  33    0.00    0.08 
  -7   0  35    0.02    0.08 
  -7   0  37    0.00    0.08 
   7  -1  36    0.06    0.15 
   7  -1  34    9.50    0.36 
   7   1  34    9.93    0.36 
   7  -1  32   46.17    0.88 
   7   1  32   46.34    0.88 
   7  -1  30    6.85    0.28 
   7   1  30    6.77    0.28 
   7  -1  28   31.25    0.64 
   7   1  28   31.07    0.64 
   7  -1  26   54.84    0.93 
  -7  -1 -26   54.95    1.00 
   7   1  26   53.84    0.93 
  -7  -1 -24   73.29    1.07 
   7  -1  24   73.31    1.15 
   7   1  24   73.19    1.15 
  -7  -1 -22   21.83    0.41 
   7  -1  22   21.99    0.47 
   7   1  22   22.05    0.47 
   7  -1  20   10.76    0.29 
  -7  -1 -20   10.58    0.25 
   7  -1  20   10.60    0.24 
  -7   1 -20   10.56    0.22 
   7   1  20   11.11    0.29 
   7  -1  18  194.97    2.48 
   7  -1  18  186.56    2.54 
  -7  -1 -18  194.73    2.49 
  -7   1 -18  190.98    2.45 
   7   1  18  186.57    2.54 
   7  -1  16   16.63    0.31 
  -7  -1 -16   15.91    0.31 
   7  -1  16   16.29    0.34 
  -7   1 -16   16.55    0.29 
   7   1  16   16.25    0.34 
   7   1  16   16.73    0.27 
   7  -1  14    6.09    0.16 
  -7  -1 -14    6.04    0.16 
   7  -1  14    6.09    0.18 
   7   1  14    6.37    0.19 
   7   1  14    6.14    0.14 
  -7   1 -14    6.26    0.15 
  -7  -1 -12  220.59    3.01 
   7  -1  12  219.50    2.97 
   7  -1  12  215.08    2.90 
   7   1  12  212.14    2.81 
  -7   1 -12  217.41    2.93 
   7  -1  10   17.00    0.31 
   7  -1  10   17.16    0.30 
  -7  -1 -10   16.92    0.30 
  -7   1 -10   16.81    0.28 
   7   1  10   17.25    0.32 
  -7  -1  -8    0.37    0.04 
   7  -1   8    0.66    0.06 
   7   1   8    0.42    0.05 
  -7   1  -8    0.47    0.04 
   7  -1   6  241.60    3.37 
   7  -1   6  240.72    3.32 
  -7  -1  -6  240.69    3.37 
  -7   1  -6  245.15    3.22 
   7  -1   4  126.12    1.65 
   7  -1   4  125.11    1.74 
  -7  -1  -4  128.59    1.76 
  -7   1  -4  125.40    1.73 
  -7  -1  -2   62.64    0.85 
  -7   1  -2   62.80    0.84 
   7  -1   0   75.68    1.03 
  -7  -1   0   77.56    1.01 
  -7   1   0   74.78    1.00 
  -7  -1   2    3.15    0.09 
  -7   1   2    3.47    0.09 
  -7  -1   4   11.50    0.20 
  -7   1   4   11.29    0.18 
  -7   1   4   11.23    0.20 
  -7  -1   6    8.38    0.17 
  -7  -1   6    8.49    0.16 
  -7   1   6    8.47    0.15 
  -7   1   6    8.37    0.17 
  -7  -1   8   35.74    0.54 
  -7  -1   8   36.47    0.52 
  -7   1   8   37.41    0.53 
  -7   1   8   36.80    0.51 
  -7  -1  10   34.45    0.49 
  -7  -1  10   34.92    0.52 
  -7   1  10   33.65    0.51 
  -7   1  10   33.95    0.50 
  -7  -1  12   43.61    0.65 
  -7  -1  12   43.62    0.61 
  -7   1  12   44.02    0.64 
  -7   1  12   43.58    0.64 
  -7  -1  14    2.26    0.08 
  -7  -1  14    2.13    0.10 
  -7   1  14    2.50    0.11 
  -7   1  14    2.30    0.09 
  -7  -1  16    0.25    0.05 
  -7  -1  16    0.26    0.04 
  -7   1  16    0.37    0.06 
  -7   1  16    0.19    0.04 
  -7  -1  18   38.14    0.56 
  -7  -1  18   39.02    0.64 
  -7   1  18   38.72    0.63 
  -7   1  18   38.58    0.59 
  -7  -1  20    8.18    0.24 
  -7  -1  20    8.21    0.18 
  -7   1  20    8.54    0.24 
  -7   1  20    8.40    0.20 
  -7  -1  22    2.30    0.09 
  -7  -1  22    2.13    0.14 
  -7   1  22    2.01    0.13 
  -7   1  22    2.20    0.11 
  -7  -1  24   82.91    1.26 
  -7   1  24   82.89    1.17 
  -7   1  24   81.65    1.24 
  -7  -1  26    1.43    0.14 
  -7   1  26    1.37    0.10 
  -7   1  26    1.16    0.12 
  -7  -1  28    9.37    0.31 
  -7   1  28    9.66    0.25 
  -7   1  28    9.79    0.31 
  -7  -1  30   39.36    0.76 
  -7   1  30   39.55    0.75 
  -7  -1  32   10.14    0.35 
  -7   1  32   10.38    0.34 
  -7  -1  34   17.00    0.48 
  -7   1  34   16.64    0.46 
  -7  -1  36   17.51    0.50 
  -7   1  36   17.81    0.49 
  -7   1  38   24.33    0.61 
   7  -2  35    0.58    0.13 
   7   2  35    0.46    0.12 
   7  -2  33    0.16    0.09 
   7   2  33    0.12    0.09 
   7  -2  31    0.35    0.11 
   7   2  31    0.27    0.10 
   7  -2  29    0.05    0.08 
   7   2  29    0.16    0.08 
  -7  -2 -27    0.37    0.07 
   7  -2  27    0.60    0.11 
   7   2  27    0.46    0.10 
   7  -2  25    1.43    0.13 
  -7  -2 -25    1.53    0.11 
   7   2  25    1.13    0.12 
   7  -2  23    0.57    0.08 
   7  -2  23    0.43    0.08 
  -7  -2 -23    0.42    0.07 
   7   2  23    0.51    0.09 
   7  -2  21    0.50    0.08 
  -7  -2 -21    0.53    0.07 
   7  -2  21    0.48    0.07 
   7   2  21    0.70    0.10 
   7  -2  19    6.00    0.18 
  -7  -2 -19    5.74    0.18 
   7  -2  19    6.25    0.21 
   7   2  19    6.09    0.21 
   7  -2  17    1.17    0.10 
  -7  -2 -17    1.12    0.09 
   7  -2  17    1.12    0.09 
  -7   2 -17    0.92    0.06 
   7   2  17    1.09    0.10 
  -7  -2 -15   25.78    0.44 
   7  -2  15   25.53    0.44 
   7  -2  15   25.41    0.46 
   7   2  15   25.43    0.47 
  -7   2 -15   25.66    0.39 
  -7  -2 -13   10.22    0.23 
   7  -2  13   10.43    0.24 
   7  -2  13   10.21    0.23 
  -7   2 -13   10.17    0.19 
   7   2  13   10.30    0.24 
   7  -2  11   16.81    0.31 
   7  -2  11   16.28    0.31 
  -7  -2 -11   16.84    0.31 
   7   2  11   16.22    0.32 
  -7   2 -11   16.70    0.27 
   7  -2   9   81.76    1.11 
  -7  -2  -9   82.64    1.12 
   7  -2   9   82.62    1.13 
  -7   2  -9   79.91    1.07 
   7   2   9   81.49    1.13 
   7  -2   7    0.11    0.03 
   7  -2   7    0.11    0.04 
  -7  -2  -7    0.07    0.03 
  -7   2  -7    0.11    0.03 
   7  -2   5  104.62    1.39 
   7  -2   5  103.48    1.39 
  -7  -2  -5  106.25    1.38 
  -7   2  -5  102.87    1.35 
  -7  -2  -3   73.23    0.98 
   7  -2   3   71.78    1.00 
   7  -2   3   73.74    0.97 
  -7   2  -3   73.72    0.97 
   7  -2   1   50.39    0.72 
  -7  -2  -1   50.52    0.70 
  -7   2  -1   50.22    0.69 
   7  -2  -1  145.63    1.91 
  -7   2   1  148.89    2.06 
  -7  -2   3   27.27    0.40 
  -7   2   3   27.51    0.35 
  -7   2   3   27.21    0.42 
  -7  -2   5   93.63    1.23 
  -7  -2   5   95.28    1.26 
  -7   2   5   93.29    1.23 
  -7   2   5   95.47    1.25 
  -7  -2   7   69.39    0.92 
  -7  -2   7   70.28    0.96 
  -7   2   7   68.71    0.91 
  -7   2   7   70.54    0.95 
  -7  -2   9   15.65    0.29 
  -7  -2   9   15.76    0.25 
  -7   2   9   15.72    0.26 
  -7   2   9   16.00    0.29 
  -7  -2  11  135.17    1.77 
  -7  -2  11  135.48    1.70 
  -7   2  11  129.56    1.75 
  -7   2  11  132.43    1.73 
  -7  -2  13    5.52    0.16 
  -7  -2  13    5.45    0.12 
  -7   2  13    5.74    0.15 
  -7   2  13    5.58    0.15 
  -7  -2  15   49.54    0.78 
  -7  -2  15   51.49    0.70 
  -7   2  15   52.39    0.76 
  -7   2  15   51.92    0.76 
  -7  -2  17   52.68    0.72 
  -7  -2  17   53.32    0.82 
  -7   2  17   53.06    0.80 
  -7   2  17   53.06    0.78 
  -7  -2  19    0.17    0.03 
  -7  -2  19    0.35    0.07 
  -7   2  19    0.23    0.06 
  -7   2  19    0.23    0.05 
  -7  -2  21   32.14    0.59 
  -7   2  21   31.15    0.56 
  -7   2  21   32.16    0.54 
  -7  -2  23    6.69    0.24 
  -7   2  23    6.34    0.22 
  -7   2  23    6.90    0.20 
  -7  -2  25   10.78    0.32 
  -7   2  25   11.00    0.27 
  -7   2  25   11.11    0.31 
  -7  -2  27   15.44    0.41 
  -7   2  27   15.71    0.39 
  -7   2  27   15.49    0.34 
  -7  -2  29    0.17    0.09 
  -7   2  29    0.05    0.07 
  -7   2  29    0.11    0.06 
  -7  -2  31    6.28    0.27 
  -7   2  31    6.54    0.26 
  -7  -2  33    2.62    0.21 
  -7   2  33    2.76    0.19 
  -7  -2  35    0.15    0.10 
  -7   2  35    0.02    0.08 
  -7  -2  37    1.13    0.18 
  -7   2  37    1.09    0.15 
   7  -3  34    1.27    0.16 
   7   3  34    1.63    0.18 
   7  -3  32   14.72    0.44 
   7   3  32   14.90    0.44 
  -7  -3 -30    5.25    0.22 
   7  -3  30    5.80    0.27 
   7   3  30    5.41    0.26 
   7  -3  28    9.33    0.32 
  -7  -3 -28    8.91    0.27 
   7   3  28    8.87    0.31 
  -7  -3 -26   31.10    0.58 
   7  -3  26   31.72    0.63 
   7   3  26   30.30    0.63 
   7  -3  24   39.95    0.68 
   7  -3  24   39.12    0.72 
  -7  -3 -24   40.75    0.69 
   7   3  24   39.78    0.73 
  -7  -3 -22    7.62    0.23 
   7  -3  22    7.46    0.23 
   7  -3  22    7.25    0.25 
   7   3  22    7.21    0.25 
   7  -3  20   11.15    0.30 
  -7  -3 -20   10.88    0.28 
   7  -3  20   11.33    0.29 
   7   3  20   11.12    0.30 
   7  -3  18   62.77    0.94 
   7  -3  18   62.55    0.96 
  -7  -3 -18   61.05    0.93 
   7   3  18   61.40    0.96 
   7  -3  16    3.22    0.14 
  -7  -3 -16    3.11    0.13 
   7  -3  16    2.97    0.14 
   7   3  16    3.07    0.14 
  -7  -3 -14    1.73    0.10 
   7  -3  14    1.80    0.11 
   7  -3  14    1.97    0.11 
   7   3  14    1.66    0.10 
  -7   3 -14    2.18    0.07 
  -7  -3 -12   99.86    1.37 
   7  -3  12  102.06    1.39 
   7  -3  12   99.30    1.36 
  -7   3 -12   97.88    1.29 
   7  -3  10    0.89    0.07 
  -7  -3 -10    0.99    0.07 
   7  -3  10    1.10    0.08 
  -7   3 -10    0.93    0.05 
   7  -3   8    1.62    0.08 
   7  -3   8    1.33    0.09 
  -7  -3  -8    1.48    0.08 
  -7   3  -8    1.50    0.06 
   7  -3   6   78.59    1.05 
  -7  -3  -6   78.95    1.09 
   7  -3   6   79.87    1.11 
  -7   3  -6   79.89    1.05 
   7  -3   4   71.99    0.93 
  -7  -3  -4   69.98    0.98 
   7  -3   4   71.81    1.00 
  -7   3  -4   71.51    0.95 
   7  -3   2    3.73    0.08 
   7  -3   2    3.80    0.13 
  -7  -3  -2    3.65    0.11 
  -7   3  -2    3.68    0.10 
   7  -3   0   19.46    0.33 
  -7  -3   0   17.45    0.30 
  -7   3   0   17.44    0.30 
   7  -3  -2   44.01    0.65 
  -7  -3   2   43.29    0.61 
  -7   3   2   43.24    0.63 
  -7  -3   4    2.19    0.08 
   7  -3  -4    2.19    0.10 
  -7   3   4    2.04    0.08 
   7  -3  -6   15.62    0.28 
  -7  -3   6   15.49    0.29 
  -7  -3   6   15.12    0.25 
  -7   3   6   14.69    0.21 
  -7   3   6   14.78    0.28 
  -7  -3   8   44.79    0.62 
  -7  -3   8   45.60    0.68 
  -7   3   8   46.15    0.67 
  -7   3   8   44.80    0.60 
  -7  -3  10   27.97    0.46 
  -7  -3  10   27.59    0.40 
  -7   3  10   27.57    0.40 
  -7   3  10   26.72    0.45 
  -7  -3  12   11.53    0.26 
  -7  -3  12   11.58    0.20 
  -7   3  12   11.18    0.22 
  -7   3  12   11.68    0.25 
  -7  -3  14    0.80    0.05 
  -7  -3  14    0.84    0.08 
  -7   3  14    0.93    0.07 
  -7   3  14    1.02    0.08 
  -7  -3  16    2.50    0.07 
  -7  -3  16    2.42    0.12 
  -7   3  16    2.21    0.11 
  -7   3  16    2.38    0.11 
  -7  -3  18    8.51    0.25 
  -7   3  18    8.50    0.22 
  -7   3  18    8.34    0.22 
  -7  -3  20    0.03    0.06 
  -7   3  20    0.10    0.05 
  -7   3  20    0.04    0.04 
  -7  -3  22    1.60    0.13 
  -7   3  22    1.64    0.12 
  -7   3  22    1.30    0.10 
  -7  -3  24   48.93    0.84 
  -7   3  24   49.19    0.79 
  -7   3  24   48.25    0.80 
  -7  -3  26    0.40    0.10 
  -7   3  26    0.32    0.07 
  -7   3  26    0.39    0.08 
  -7  -3  28    0.40    0.10 
  -7   3  28    0.32    0.07 
  -7   3  28    0.34    0.08 
  -7  -3  30   21.57    0.53 
  -7   3  30   22.99    0.51 
  -7   3  30   22.81    0.47 
  -7  -3  32    4.01    0.24 
  -7   3  32    4.22    0.20 
  -7   3  32    4.25    0.22 
  -7  -3  34    3.47    0.24 
  -7   3  34    3.24    0.21 
  -7  -3  36   10.65    0.41 
  -7   3  36   10.64    0.37 
   7  -4  33    0.02    0.09 
   7   4  33   -0.08    0.06 
   7  -4  31    0.30    0.10 
  -7  -4 -31    0.48    0.10 
   7   4  31    0.49    0.11 
   7  -4  29    0.29    0.10 
  -7  -4 -29    0.27    0.08 
   7   4  29    0.27    0.09 
   7  -4  27    0.25    0.09 
  -7  -4 -27    0.20    0.07 
   7   4  27    0.19    0.08 
   7  -4  25    2.64    0.16 
   7  -4  25    2.76    0.18 
  -7  -4 -25    2.89    0.16 
   7   4  25    2.79    0.18 
   7  -4  23    0.06    0.07 
  -7  -4 -23    0.19    0.06 
   7  -4  23    0.16    0.07 
   7   4  23    0.19    0.07 
   7  -4  21   11.57    0.32 
   7  -4  21   11.60    0.31 
  -7  -4 -21   11.88    0.31 
   7   4  21   11.50    0.32 
  -7  -4 -19   15.00    0.34 
   7  -4  19   15.19    0.36 
   7  -4  19   15.48    0.36 
   7   4  19   14.99    0.36 
   7  -4  17    0.58    0.08 
   7  -4  17    0.57    0.08 
  -7  -4 -17    0.63    0.08 
  -7  -4 -15   28.33    0.51 
   7  -4  15   28.24    0.52 
   7  -4  15   29.01    0.51 
   7  -4  13   10.14    0.24 
   7  -4  13   10.40    0.27 
  -7  -4 -13    9.92    0.25 
  -7   4 -13   10.00    0.20 
   7  -4  11   31.73    0.51 
  -7  -4 -11   31.65    0.53 
   7  -4  11   31.79    0.55 
  -7   4 -11   31.67    0.46 
   7  -4   9   82.20    1.18 
   7  -4   9   82.35    1.12 
  -7  -4  -9   83.65    1.16 
  -7   4  -9   81.64    1.09 
   7  -4   7    0.89    0.09 
   7  -4   7    0.74    0.06 
  -7  -4  -7    0.76    0.07 
  -7   4  -7    0.66    0.05 
   7  -4   5  125.34    1.69 
   7  -4   5  130.06    1.73 
  -7  -4  -5  128.97    1.71 
  -7   4  -5  128.99    1.67 
   7  -4   3   75.73    0.98 
  -7  -4  -3   74.58    1.04 
   7  -4   3   74.96    1.07 
  -7   4  -3   76.75    1.02 
  -7  -4  -1   38.91    0.58 
   7  -4   1   38.57    0.60 
   7  -4   1   38.11    0.50 
  -7   4  -1   38.19    0.57 
  -7  -4   1  113.01    1.52 
   7  -4  -1  116.31    1.56 
  -7   4   1  117.02    1.53 
  -7  -4   3    4.11    0.12 
   7  -4  -3    4.31    0.14 
  -7   4   3    4.32    0.13 
  -7  -4   5  163.53    2.18 
   7  -4  -5  161.20    2.12 
  -7   4   5  160.70    2.11 
   7  -4  -7  124.07    1.65 
  -7  -4   7  121.64    1.66 
  -7  -4   7  124.19    1.60 
  -7   4   7  125.70    1.66 
  -7  -4   9   18.86    0.30 
  -7  -4   9   19.25    0.36 
   7  -4  -9   18.65    0.34 
  -7   4   9   18.48    0.28 
  -7   4   9   18.87    0.35 
  -7  -4  11  188.66    2.51 
  -7  -4  11  197.52    2.52 
  -7   4  11  192.60    2.51 
  -7   4  11  187.18    2.56 
  -7  -4  13   17.90    0.37 
  -7  -4  13   18.67    0.28 
  -7   4  13   18.50    0.31 
  -7   4  13   17.84    0.36 
  -7  -4  15   55.95    0.86 
  -7  -4  15   52.99    0.74 
  -7   4  15   54.97    0.83 
  -7   4  15   55.26    0.79 
  -7  -4  17   81.30    1.21 
  -7   4  17   82.28    1.19 
  -7   4  17   83.73    1.15 
  -7  -4  19    0.45    0.08 
  -7   4  19    0.25    0.06 
  -7   4  19    0.38    0.06 
  -7  -4  21   67.26    1.07 
  -7   4  21   69.06    1.02 
  -7   4  21   69.78    1.04 
  -7  -4  23   23.69    0.51 
  -7   4  23   23.51    0.46 
  -7   4  23   22.96    0.47 
  -7  -4  25   10.09    0.32 
  -7   4  25   10.17    0.28 
  -7   4  25   10.30    0.29 
  -7  -4  27   32.86    0.67 
  -7   4  27   31.48    0.60 
  -7   4  27   32.07    0.61 
  -7  -4  29    1.17    0.15 
  -7   4  29    1.60    0.14 
  -7   4  29    0.93    0.11 
  -7  -4  31   10.73    0.37 
  -7   4  31   10.41    0.31 
  -7  -4  33    7.11    0.32 
  -7   4  33    6.99    0.26 
  -7  -4  35    0.23    0.12 
  -7  -5 -32    0.02    0.07 
   7  -5  32    0.01    0.09 
   7  -5  30    1.73    0.18 
  -7  -5 -30    1.50    0.14 
  -7  -5 -28    1.77    0.15 
   7  -5  28    1.48    0.16 
   7  -5  28    1.87    0.17 
   7  -5  26    3.65    0.21 
  -7  -5 -26    3.78    0.19 
   7  -5  26    3.63    0.20 
   7  -5  24    5.54    0.23 
  -7  -5 -24    5.94    0.23 
   7  -5  24    5.79    0.24 
   7  -5  22    4.11    0.20 
  -7  -5 -22    4.27    0.19 
   7  -5  22    4.65    0.21 
  -7  -5 -20    0.43    0.08 
   7  -5  20    0.34    0.08 
   7  -5  20    0.32    0.08 
   7  -5  18    4.98    0.19 
  -7  -5 -18    4.95    0.19 
   7  -5  18    4.63    0.20 
   7  -5  16    2.60    0.14 
   7  -5  16    2.74    0.16 
   7  -5  14    0.26    0.06 
   7  -5  14    0.17    0.05 
   7  -5  12   13.49    0.32 
   7  -5  12   13.29    0.29 
  -7  -5 -10    0.55    0.08 
   7  -5  10    0.58    0.06 
   7  -5  10    0.70    0.09 
  -7   5 -10    0.69    0.05 
   7  -5   8   16.95    0.30 
  -7  -5  -8   16.74    0.34 
   7  -5   8   16.04    0.35 
  -7   5  -8   16.82    0.28 
  -7  -5  -6    3.18    0.13 
   7  -5   6    3.18    0.14 
   7  -5   6    3.28    0.11 
  -7   5  -6    3.49    0.11 
  -7  -5  -4   14.88    0.30 
   7  -5   4   14.77    0.24 
   7  -5   4   14.24    0.32 
  -7   5  -4   14.55    0.27 
  -7  -5  -2    2.65    0.11 
   7  -5   2    2.63    0.07 
   7  -5   2    2.53    0.13 
  -7   5  -2    2.70    0.10 
  -7  -5   0    0.11    0.03 
   7  -5   0    0.09    0.04 
   7  -5   0    0.14    0.02 
  -7   5   0    0.12    0.03 
   7  -5  -2    2.24    0.05 
   7  -5  -2    2.28    0.11 
  -7  -5   2    2.20    0.09 
  -7   5   2    2.06    0.10 
  -7  -5   4   10.33    0.21 
   7  -5  -4   10.65    0.25 
   7  -5  -4   10.58    0.15 
  -7   5   4   11.04    0.24 
  -7  -5   6    2.79    0.10 
   7  -5  -6    2.95    0.13 
  -7  -5   6    2.64    0.12 
  -7   5   6    2.80    0.12 
  -7  -5   8   10.43    0.20 
   7  -5  -8   10.29    0.24 
  -7  -5   8   10.48    0.25 
  -7   5   8   10.72    0.25 
   7  -5 -10   22.10    0.39 
  -7  -5  10   21.78    0.42 
  -7  -5  10   22.04    0.34 
  -7   5  10   22.04    0.41 
  -7  -5  12    0.48    0.07 
  -7  -5  12    0.64    0.05 
  -7   5  12    0.60    0.07 
  -7  -5  14    4.26    0.17 
  -7   5  14    3.83    0.15 
  -7   5  14    4.03    0.13 
  -7  -5  16    3.49    0.16 
  -7   5  16    3.07    0.15 
  -7  -5  18    0.38    0.08 
  -7   5  18    0.63    0.08 
  -7  -5  20    1.62    0.13 
  -7   5  20    1.87    0.13 
  -7  -5  22    2.61    0.17 
  -7   5  22    2.52    0.15 
  -7  -5  24    7.25    0.27 
  -7   5  24    7.30    0.25 
  -7  -5  26    0.72    0.12 
  -7   5  26    0.73    0.10 
  -7  -5  28    3.13    0.21 
  -7   5  28    3.32    0.18 
  -7  -5  30    2.18    0.20 
  -7   5  30    2.12    0.16 
  -7  -5  32    1.15    0.16 
  -7   5  32    0.96    0.13 
  -7   5  34    1.10    0.13 
  -7  -6 -31    0.49    0.11 
   7  -6  31    0.60    0.12 
   7  -6  29    0.04    0.09 
   7  -6  29   -0.04    0.07 
  -7  -6 -29    0.11    0.07 
   7  -6  27    0.17    0.09 
  -7  -6 -27    0.19    0.08 
   7  -6  27    0.24    0.09 
   7  -6  25    0.81    0.12 
  -7  -6 -25    0.78    0.11 
   7  -6  25    0.56    0.11 
  -7  -6 -23   -0.01    0.06 
   7  -6  23   -0.05    0.06 
   7  -6  23    0.06    0.07 
   7  -6  21    5.53    0.24 
   7  -6  21    5.74    0.22 
  -7  -6 -21    5.46    0.22 
   7  -6  19    7.55    0.27 
   7  -6  19    7.79    0.25 
   7  -6  17    0.44    0.09 
   7  -6  17    0.34    0.07 
   7  -6  15   11.23    0.28 
   7  -6  15   11.39    0.32 
   7  -6  13    5.59    0.18 
   7  -6  13    5.46    0.21 
   7  -6  11   34.51    0.56 
   7  -6  11   34.28    0.63 
   7  -6   9   50.09    0.83 
   7  -6   9   51.17    0.75 
  -7  -6  -9   50.41    0.80 
   7  -6   7    0.27    0.07 
   7  -6   7    0.33    0.05 
  -7   6  -7    0.38    0.05 
   7  -6   5  105.34    1.49 
  -7  -6  -5  103.70    1.45 
   7  -6   5  105.43    1.38 
  -7   6  -5  103.51    1.40 
   7  -6   3   61.94    0.83 
  -7  -6  -3   61.97    0.91 
   7  -6   3   61.78    0.95 
  -7   6  -3   61.11    0.88 
   7  -6   1   18.41    0.37 
  -7  -6  -1   16.73    0.33 
   7  -6   1   16.40    0.26 
  -7   6  -1   16.86    0.32 
   7  -6  -1   91.90    1.30 
  -7  -6   1   91.10    1.26 
  -7   6   1   91.42    1.27 
  -7  -6   3    3.98    0.13 
   7  -6  -3    4.18    0.16 
  -7   6   3    4.20    0.15 
  -7  -6   5   93.32    1.25 
  -7  -6   5   93.04    1.31 
   7  -6  -5   92.66    1.30 
  -7   6   5   89.89    1.29 
   7  -6  -7   94.16    1.31 
  -7  -6   7   92.41    1.24 
  -7  -6   7   93.71    1.32 
  -7   6   7   91.20    1.31 
   7  -6  -9    7.12    0.21 
  -7  -6   9    7.19    0.22 
  -7  -6   9    7.11    0.16 
  -7   6   9    6.98    0.21 
   7  -6 -11  110.44    1.50 
  -7  -6  11  108.58    1.54 
  -7   6  11  108.04    1.53 
  -7  -6  13   10.55    0.28 
   7  -6 -13   10.47    0.25 
  -7   6  13   10.64    0.28 
  -7  -6  15   28.53    0.55 
  -7   6  15   28.95    0.54 
  -7  -6  17   52.07    0.86 
  -7   6  17   51.99    0.85 
  -7  -6  19    1.50    0.14 
  -7   6  19    1.61    0.13 
  -7  -6  21   52.24    0.90 
  -7   6  21   50.82    0.86 
  -7  -6  23   17.96    0.45 
  -7   6  23   18.43    0.43 
  -7  -6  25    8.16    0.31 
  -7   6  25    8.07    0.28 
  -7  -6  27   22.06    0.54 
  -7   6  27   21.82    0.50 
  -7  -6  29    0.68    0.13 
  -7   6  29    0.46    0.09 
  -7  -6  31    8.93    0.35 
  -7   6  31    8.39    0.31 
  -7   6  33    3.45    0.22 
   7  -7  30    0.06    0.09 
   7  -7  30    0.07    0.10 
   7  -7  28   10.96    0.38 
  -7  -7 -28   11.64    0.37 
   7  -7  28   11.45    0.38 
   7  -7  26    0.12    0.09 
   7  -7  26    0.04    0.08 
  -7  -7 -26   -0.03    0.07 
   7  -7  24    2.78    0.20 
   7  -7  24    2.94    0.19 
  -7  -7 -24    2.77    0.19 
   7  -7  22   28.99    0.63 
  -7  -7 -22   28.91    0.60 
   7  -7  22   28.53    0.58 
   7  -7  20    0.10    0.07 
   7  -7  20    0.10    0.07 
  -7  -7 -20    0.22    0.08 
   7  -7  18    9.15    0.31 
   7  -7  18    9.07    0.28 
   7  -7  16   22.34    0.51 
   7  -7  16   21.41    0.44 
   7  -7  14    6.01    0.20 
   7  -7  14    5.98    0.25 
   7  -7  12    8.76    0.29 
   7  -7  12    8.46    0.23 
   7  -7  10   10.79    0.32 
  -7  -7  -8   28.90    0.54 
   7  -7   8   29.96    0.58 
   7  -7   6    8.55    0.27 
  -7  -7  -6    7.91    0.24 
  -7   7  -6    8.26    0.20 
   7  -7   4   15.26    0.36 
  -7  -7  -4   14.38    0.32 
  -7   7  -4   14.83    0.30 
   7  -7   2    5.81    0.21 
  -7  -7  -2    5.88    0.18 
  -7   7  -2    5.96    0.18 
   7  -7   0    0.15    0.06 
  -7  -7   0    0.19    0.05 
  -7   7   0    0.11    0.05 
  -7  -7   2    0.03    0.03 
   7  -7  -2    0.04    0.05 
  -7   7   2    0.05    0.04 
  -7  -7   4   13.87    0.28 
  -7  -7   4   13.16    0.31 
   7  -7  -4   13.07    0.32 
  -7   7   4   13.12    0.30 
   7  -7  -6    3.16    0.15 
  -7  -7   6    3.32    0.15 
  -7  -7   6    3.24    0.12 
  -7   7   6    3.25    0.15 
  -7  -7   8    1.74    0.09 
   7  -7  -8    1.60    0.12 
  -7  -7   8    1.59    0.12 
  -7   7   8    1.69    0.12 
   7  -7 -10    9.04    0.24 
  -7  -7  10    8.89    0.26 
  -7   7  10    8.78    0.26 
   7  -7 -12    0.83    0.09 
  -7  -7  12    0.91    0.11 
  -7   7  12    0.85    0.09 
  -7  -7  14    4.54    0.20 
  -7   7  14    4.72    0.20 
  -7  -7  16    1.55    0.14 
  -7   7  16    1.47    0.13 
  -7  -7  18   -0.04    0.06 
  -7   7  18   -0.07    0.04 
  -7  -7  20    2.36    0.16 
  -7   7  20    2.25    0.16 
  -7  -7  22    5.78    0.26 
  -7   7  22    5.79    0.24 
  -7  -7  24    0.41    0.11 
  -7   7  24    0.45    0.09 
  -7  -7  26    1.66    0.17 
  -7   7  26    2.31    0.18 
  -7  -7  28   10.46    0.38 
  -7   7  28   10.16    0.34 
  -7  -7  30    2.69    0.22 
  -7   7  30    3.26    0.21 
   7  -8  27    0.27    0.11 
   7  -8  25    1.18    0.16 
  -7  -8 -25    0.99    0.13 
  -7  -8 -23    3.12    0.20 
   7  -8  23    2.78    0.21 
   7  -8  21    1.01    0.14 
  -7  -8 -21    1.32    0.14 
   7  -8  19    4.78    0.25 
  -7  -8 -19    5.11    0.23 
  -7  -8 -17    0.99    0.11 
   7  -8  17    1.05    0.13 
   7  -8  15    4.54    0.23 
   7  -8  13    7.73    0.29 
  -7  -8 -11    1.05    0.11 
   7  -8  11    0.99    0.12 
  -7  -8  -9   13.48    0.34 
   7  -8   9   13.31    0.37 
   7  -8   7    0.16    0.08 
  -7  -8  -7    0.15    0.06 
   7  -8   5   18.31    0.43 
  -7  -8  -5   18.63    0.40 
   7  -8   3   10.16    0.30 
  -7  -8  -3   10.43    0.27 
  -7   8  -3    9.91    0.25 
  -7  -8  -1   11.48    0.28 
   7  -8   1   11.54    0.32 
  -7   8  -1   11.24    0.27 
   7  -8  -1   34.59    0.63 
  -7  -8   1   32.49    0.56 
  -7   8   1   33.05    0.58 
  -7  -8   3    0.74    0.08 
  -7  -8   3    0.56    0.09 
   7  -8  -3    0.53    0.09 
  -7   8   3    0.68    0.09 
  -7  -8   5   35.09    0.62 
   7  -8  -5   33.88    0.62 
  -7  -8   5   33.89    0.56 
  -7   8   5   34.62    0.61 
   7  -8  -7   29.18    0.54 
  -7  -8   7   28.22    0.55 
  -7   8   7   28.76    0.55 
  -7  -8   9    4.74    0.20 
   7  -8  -9    4.80    0.19 
  -7   8   9    4.91    0.20 
  -7  -8  11   43.48    0.76 
   7  -8 -11   44.05    0.75 
  -7   8  11   43.53    0.76 
  -7  -8  13    4.21    0.20 
  -7   8  13    3.92    0.19 
  -7  -8  15   10.88    0.32 
  -7   8  15   10.29    0.31 
  -7  -8  17   16.25    0.42 
  -7   8  17   15.62    0.40 
  -7  -8  19    0.26    0.09 
  -7   8  19    0.17    0.07 
  -7  -8  21   10.51    0.35 
  -7   8  21   10.90    0.34 
  -7  -8  23    2.15    0.19 
  -7   8  23    2.47    0.18 
  -7  -8  25    4.94    0.26 
  -7   8  25    5.61    0.26 
  -7  -8  27    4.06    0.25 
  -7   8  27    3.88    0.22 
   7  -9  24    5.56    0.38 
  -7  -9 -22   31.45    0.67 
   7  -9  22   30.88    0.71 
  -7  -9 -20   -0.04    0.06 
   7  -9  20    0.01    0.08 
   7  -9  18   15.90    0.46 
  -7  -9 -18   15.28    0.43 
  -7  -9 -16   16.38    0.43 
   7  -9  16   16.45    0.46 
  -7  -9 -14    4.41    0.22 
   7  -9  14    4.29    0.23 
  -7  -9 -12   13.92    0.38 
   7  -9  12   14.23    0.41 
   7  -9  10    0.59    0.11 
  -7  -9 -10    0.59    0.09 
  -7  -9  -8   26.58    0.54 
   7  -9   8   26.97    0.59 
   7  -9   6    9.00    0.31 
  -7  -9  -6    9.39    0.28 
   7  -9   4    0.53    0.10 
  -7  -9  -4    0.31    0.07 
   7  -9   2   11.05    0.33 
  -7  -9  -2   11.09    0.29 
   7  -9   0    0.25    0.08 
  -7  -9   0    0.50    0.08 
  -7   9   0    0.31    0.06 
   7  -9  -2    0.45    0.09 
  -7  -9   2    0.59    0.08 
  -7  -9   2    0.65    0.09 
  -7   9   2    0.54    0.08 
  -7  -9   4    6.87    0.24 
   7  -9  -4    6.60    0.25 
  -7   9   4    6.93    0.23 
   7  -9  -6    0.00    0.06 
  -7  -9   6    0.19    0.07 
  -7   9   6    0.03    0.05 
  -7  -9   8    0.08    0.06 
   7  -9  -8    0.16    0.07 
  -7   9   8    0.08    0.06 
  -7  -9  10    2.43    0.16 
  -7   9  10    2.27    0.15 
  -7  -9  12    0.97    0.12 
  -7   9  12    0.86    0.11 
  -7  -9  14    5.94    0.25 
  -7   9  14    5.50    0.24 
  -7  -9  16    0.66    0.11 
  -7   9  16    0.57    0.10 
  -7  -9  18    5.15    0.25 
  -7   9  18    5.17    0.23 
  -7  -9  20    5.49    0.26 
  -7   9  20    5.71    0.26 
  -7  -9  22    3.63    0.23 
  -7   9  22    3.75    0.22 
  -7  -9  24    4.69    0.26 
  -7   9  24    4.84    0.25 
   7 -10  19   -0.14    0.08 
  -7 -10 -19   -0.03    0.07 
  -7 -10 -17    0.20    0.09 
   7 -10  17   -0.15    0.08 
  -7 -10 -15    0.07    0.07 
   7 -10  15   -0.09    0.08 
  -7 -10 -13    0.53    0.10 
   7 -10  13    0.53    0.12 
  -7 -10 -11    0.02    0.07 
   7 -10  11    0.02    0.09 
   7 -10   9    0.50    0.11 
  -7 -10  -9    0.70    0.11 
  -7 -10  -7    0.48    0.09 
   7 -10   7    0.49    0.11 
   7 -10   5    0.63    0.11 
  -7 -10  -5    0.73    0.10 
  -7 -10  -3    0.77    0.10 
   7 -10   3    0.57    0.11 
  -7 -10  -1    0.25    0.07 
   7 -10   1    0.11    0.08 
  -7 -10   1    0.32    0.09 
   7 -10  -1    0.25    0.09 
  -7 -10   3    0.25    0.08 
   7 -10  -3    0.13    0.08 
  -7  10   3    0.32    0.08 
  -7 -10   5    0.10    0.07 
   7 -10  -5    0.08    0.07 
  -7  10   5    0.12    0.06 
  -7 -10   7    0.05    0.07 
  -7  10   7    0.18    0.07 
  -7 -10   9    0.18    0.08 
  -7  10   9    0.06    0.06 
  -7 -10  11    0.29    0.09 
  -7  10  11    0.40    0.09 
  -7 -10  13    0.73    0.12 
  -7  10  13    0.55    0.10 
  -7 -10  15    0.04    0.08 
  -7  10  15    0.14    0.08 
  -7 -10  17    0.03    0.08 
  -7  10  17    0.07    0.08 
  -7 -10  19    0.51    0.12 
  -7  10  19    0.41    0.11 
  -7 -10  21   -0.07    0.09 
  -7 -11 -14    4.04    0.23 
   7 -11  12   12.79    0.43 
  -7 -11 -12   12.58    0.38 
   7 -11  10    0.19    0.11 
  -7 -11 -10    0.35    0.10 
  -7 -11  -8   16.14    0.43 
   7 -11   8   17.11    0.49 
   7 -11   6    4.72    0.26 
  -7 -11  -6    4.69    0.23 
  -7 -11  -4    0.05    0.07 
   7 -11   4   -0.14    0.07 
   7 -11   2    5.60    0.27 
  -7 -11  -2    6.00    0.24 
   7 -11   0    0.07    0.09 
  -7 -11   0    0.10    0.07 
   7 -11  -2    0.17    0.09 
  -7 -11   2    0.16    0.08 
  -7 -11   4    0.67    0.11 
   7 -11  -4    0.49    0.11 
  -7 -11   6    1.49    0.15 
  -7  11   6    1.40    0.14 
  -7 -11   8    0.00    0.07 
  -7  11   8    0.05    0.07 
  -7 -11  10   -0.06    0.07 
  -7  11  10    0.00    0.07 
  -7 -11  12   -0.05    0.08 
  -7  11  12    0.13    0.08 
  -7 -11  14    2.90    0.22 
  -7  11  14    3.49    0.22 
  -7 -11  16   -0.04    0.08 
  -7  11  16    0.09    0.08 
  -7 -11  18    3.03    0.22 
  -7 -12  -9    3.72    0.22 
  -7 -12  -7    0.14    0.09 
   7 -12   5    5.36    0.29 
   7 -12   3    1.84    0.19 
   7 -12   1    4.30    0.26 
   7 -12  -1   13.81    0.43 
  -7  12   9    0.42    0.10 
   8   0  34    2.29    0.20 
   8   0  32   12.86    0.41 
   8   0  30    9.08    0.33 
   8   0  28    4.17    0.22 
   8   0  26   23.52    0.52 
   8   0  24   19.38    0.45 
  -8   0 -22    0.56    0.07 
   8   0  22    0.39    0.08 
  -8   0 -20    3.87    0.14 
   8   0  20    3.52    0.16 
   8   0  18    9.99    0.22 
  -8   0 -18   10.36    0.23 
   8   0  18    9.55    0.26 
  -8   0 -16    1.41    0.08 
   8   0  16    1.35    0.10 
   8   0  16    1.56    0.09 
   8   0  14   13.71    0.30 
  -8   0 -14   14.40    0.27 
   8   0  14   14.67    0.27 
  -8   0 -12   10.22    0.21 
   8   0  12   10.00    0.21 
   8   0  12    9.64    0.23 
   8   0  10    1.30    0.08 
  -8   0 -10    1.21    0.07 
   8   0   8  127.70    1.64 
   8   0   8  121.58    1.64 
  -8   0  -8  126.46    1.63 
  -8   0  -6    1.29    0.06 
   8   0   6    1.26    0.07 
  -8   0  -4    0.09    0.03 
  -8   0  -2  242.30    3.36 
  -8   0   0   -0.01    0.02 
  -8   0   2    1.01    0.06 
  -8   0   4  272.99    6.04 
  -8   0   6   96.46    1.25 
  -8   0   6   92.97    1.23 
  -8   0   8   17.87    0.30 
  -8   0   8   17.80    0.29 
  -8   0  10  246.05    3.36 
  -8   0  10  237.25    3.10 
  -8   0  12  242.78    3.41 
  -8   0  12  253.03    3.37 
  -8   0  14   39.87    0.61 
  -8   0  14   39.78    0.59 
  -8   0  16   31.93    0.52 
  -8   0  16   30.78    0.48 
  -8   0  18  175.97    2.33 
  -8   0  18  174.80    2.27 
  -8   0  20    6.78    0.21 
  -8   0  20    6.83    0.17 
  -8   0  22    8.74    0.25 
  -8   0  22    8.04    0.20 
  -8   0  24  207.79    2.85 
  -8   0  24  216.86    2.75 
  -8   0  26    0.07    0.07 
  -8   0  28   14.87    0.39 
  -8   0  30   78.68    1.26 
  -8   0  32   10.34    0.35 
  -8   0  34   13.16    0.41 
  -8   0  36   17.58    0.50 
  -8   0  38   18.26    0.74 
   8  -1  35    1.40    0.16 
   8   1  35    1.22    0.16 
   8  -1  33    0.41    0.11 
   8   1  33    0.43    0.11 
   8  -1  31    2.23    0.19 
   8   1  31    2.09    0.18 
   8  -1  29    1.20    0.15 
   8   1  29    0.52    0.11 
   8  -1  27    2.47    0.17 
   8   1  27    2.69    0.17 
   8  -1  25    3.33    0.19 
  -8  -1 -25    3.37    0.15 
   8   1  25    3.29    0.19 
   8  -1  23    0.14    0.07 
  -8  -1 -23    0.18    0.05 
   8   1  23    0.25    0.08 
   8  -1  21   15.92    0.32 
   8  -1  21   15.91    0.37 
  -8  -1 -21   15.27    0.32 
  -8   1 -21   15.30    0.35 
   8   1  21   14.78    0.36 
   8  -1  19    5.04    0.19 
   8  -1  19    5.00    0.16 
  -8  -1 -19    5.06    0.16 
   8   1  19    4.96    0.19 
  -8   1 -19    5.05    0.15 
   8  -1  17    1.01    0.10 
  -8  -1 -17    0.99    0.08 
   8  -1  17    0.99    0.09 
   8   1  17    1.06    0.10 
  -8   1 -17    0.98    0.07 
   8  -1  15   16.33    0.33 
  -8  -1 -15   16.02    0.31 
   8  -1  15   15.91    0.31 
   8   1  15   15.28    0.33 
  -8   1 -15   15.53    0.28 
  -8  -1 -13    1.37    0.08 
   8  -1  13    1.44    0.09 
   8  -1  13    1.44    0.08 
   8   1  13    1.51    0.10 
  -8   1 -13    1.41    0.07 
   8  -1  11   11.19    0.23 
   8  -1  11   10.91    0.24 
  -8  -1 -11   11.33    0.23 
   8   1  11   11.19    0.25 
  -8   1 -11   11.73    0.22 
  -8  -1  -9   13.28    0.25 
   8  -1   9   12.99    0.25 
   8  -1   9   13.09    0.26 
   8   1   9   12.33    0.25 
  -8   1  -9   13.22    0.24 
   8  -1   7    0.26    0.05 
  -8  -1  -7    0.29    0.04 
   8  -1   7    0.25    0.04 
  -8   1  -7    0.24    0.04 
  -8  -1  -5   23.26    0.37 
   8  -1   5   22.63    0.35 
   8  -1   5   23.25    0.38 
  -8   1  -5   23.03    0.36 
  -8   1  -3   11.88    0.22 
  -8  -1  -1    0.74    0.05 
   8  -1   1    0.51    0.05 
  -8   1  -1    0.46    0.04 
  -8  -1   1    1.10    0.06 
  -8   1   1    1.11    0.06 
  -8  -1   3    3.69    0.10 
  -8   1   3    3.43    0.10 
  -8  -1   5    6.37    0.14 
  -8  -1   5    6.42    0.14 
  -8   1   5    6.48    0.12 
  -8   1   5    6.54    0.15 
  -8  -1   7    3.20    0.09 
  -8  -1   7    2.82    0.09 
  -8   1   7    2.88    0.10 
  -8   1   7    2.76    0.08 
  -8  -1   9    4.96    0.12 
  -8  -1   9    4.99    0.14 
  -8   1   9    5.17    0.13 
  -8   1   9    5.25    0.12 
  -8  -1  11    3.92    0.13 
  -8  -1  11    3.86    0.11 
  -8   1  11    3.79    0.11 
  -8   1  11    4.01    0.12 
  -8  -1  13    0.85    0.07 
  -8  -1  13    0.81    0.06 
  -8   1  13    0.79    0.07 
  -8   1  13    0.84    0.06 
  -8  -1  15    0.13    0.05 
  -8   1  15    0.13    0.04 
  -8   1  15    0.14    0.04 
  -8  -1  17    0.09    0.03 
  -8  -1  17    0.08    0.04 
  -8   1  17    0.18    0.04 
  -8   1  17    0.09    0.05 
  -8  -1  19    0.20    0.04 
  -8  -1  19    0.23    0.06 
  -8   1  19    0.17    0.06 
  -8   1  19    0.20    0.04 
  -8  -1  21    0.71    0.09 
  -8  -1  21    0.69    0.06 
  -8   1  21    0.78    0.07 
  -8   1  21    0.78    0.09 
  -8  -1  23    0.43    0.08 
  -8  -1  23    0.52    0.06 
  -8   1  23    0.48    0.08 
  -8   1  23    0.38    0.06 
  -8  -1  25    1.01    0.12 
  -8   1  25    0.88    0.08 
  -8   1  25    0.66    0.10 
  -8  -1  27    0.11    0.07 
  -8   1  27    0.08    0.06 
  -8   1  27    0.05    0.04 
  -8  -1  29    0.78    0.12 
  -8   1  29    0.59    0.10 
  -8  -1  31    2.36    0.18 
  -8   1  31    2.28    0.17 
  -8  -1  33    0.51    0.11 
  -8   1  33    0.53    0.11 
  -8  -1  35    0.52    0.13 
  -8   1  35    0.38    0.11 
  -8  -1  37    1.10    0.16 
  -8   1  37    1.31    0.16 
   8  -2  34    1.81    0.18 
   8   2  34    2.22    0.20 
   8  -2  32    9.98    0.36 
   8   2  32   10.12    0.36 
   8  -2  30    9.12    0.33 
   8   2  30    9.58    0.34 
   8  -2  28    2.35    0.18 
  -8  -2 -28    2.38    0.15 
   8   2  28    2.58    0.17 
  -8  -2 -26   12.71    0.31 
   8  -2  26   12.60    0.36 
   8   2  26   12.58    0.36 
  -8  -2 -24   11.41    0.29 
   8  -2  24   11.28    0.32 
   8   2  24   10.78    0.32 
  -8  -2 -22    5.54    0.19 
   8  -2  22    5.47    0.19 
   8  -2  22    5.28    0.21 
   8   2  22    5.46    0.21 
  -8  -2 -20    0.05    0.04 
   8  -2  20   -0.03    0.05 
   8  -2  20    0.07    0.05 
   8   2  20    0.05    0.06 
   8  -2  18    4.43    0.18 
   8  -2  18    4.61    0.16 
  -8  -2 -18    4.43    0.16 
   8   2  18    4.33    0.18 
  -8   2 -18    4.35    0.13 
  -8  -2 -16    7.53    0.20 
   8  -2  16    7.36    0.21 
   8  -2  16    7.46    0.22 
  -8   2 -16    7.26    0.17 
   8   2  16    9.05    0.24 
  -8  -2 -14    3.29    0.13 
   8  -2  14    3.30    0.13 
   8  -2  14    3.38    0.14 
  -8   2 -14    3.09    0.10 
   8   2  14    3.05    0.13 
   8  -2  12    0.11    0.04 
  -8  -2 -12    0.05    0.03 
   8  -2  12    0.13    0.04 
  -8   2 -12    0.05    0.03 
   8   2  12    0.06    0.04 
  -8  -2 -10   21.05    0.37 
   8  -2  10   21.49    0.38 
   8  -2  10   20.34    0.36 
   8   2  10   20.32    0.37 
  -8   2 -10   20.33    0.33 
  -8  -2  -8   79.61    1.10 
   8  -2   8   80.57    1.09 
   8  -2   8   82.04    1.12 
  -8   2  -8   80.34    1.07 
  -8  -2  -6    9.35    0.20 
   8  -2   6    9.33    0.18 
   8  -2   6    9.24    0.21 
  -8   2  -6    9.27    0.18 
   8  -2   4    1.62    0.09 
   8  -2   4    1.65    0.06 
  -8  -2  -4    1.66    0.08 
  -8   2  -4    1.48    0.07 
   8  -2   2   91.29    1.20 
  -8  -2  -2   91.62    1.21 
   8  -2   2   91.27    1.24 
  -8   2  -2   90.83    1.20 
  -8  -2   0    1.36    0.07 
   8  -2   0    1.48    0.08 
  -8   2   0    1.29    0.06 
  -8  -2   2   66.75    0.89 
   8  -2  -2   66.32    0.92 
  -8   2   2   65.49    0.84 
  -8   2   2   65.32    0.90 
   8  -2  -4  185.03    2.73 
  -8  -2   4  187.05    2.59 
  -8   2   4  190.58    2.43 
  -8   2   4  190.56    2.67 
  -8  -2   6   69.04    0.94 
  -8  -2   6   71.25    0.97 
  -8   2   6   70.97    0.90 
  -8   2   6   69.58    0.96 
  -8  -2   8  102.60    1.33 
  -8  -2   8  104.21    1.37 
  -8   2   8   99.46    1.36 
  -8   2   8  103.23    1.32 
  -8  -2  10  134.04    1.76 
  -8  -2  10  136.81    1.81 
  -8   2  10  134.86    1.82 
  -8   2  10  141.21    1.80 
  -8  -2  12  224.20    3.09 
  -8  -2  12  225.67    2.89 
  -8   2  12  216.43    2.89 
  -8   2  12  225.97    3.05 
  -8  -2  14   72.29    1.03 
  -8  -2  14   72.24    0.96 
  -8   2  14   71.15    1.01 
  -8   2  14   71.45    1.00 
  -8  -2  16   10.05    0.19 
  -8  -2  16   10.47    0.26 
  -8   2  16   10.41    0.24 
  -8   2  16    9.95    0.23 
  -8  -2  18  151.62    1.96 
  -8  -2  18  153.46    2.07 
  -8   2  18  153.06    2.04 
  -8   2  18  153.72    2.03 
  -8  -2  20   10.78    0.29 
  -8  -2  20   11.28    0.21 
  -8   2  20   11.48    0.28 
  -8   2  20   10.96    0.26 
  -8  -2  22    3.73    0.18 
  -8   2  22    3.49    0.15 
  -8   2  22    3.86    0.17 
  -8  -2  24  132.97    1.91 
  -8   2  24  134.50    1.88 
  -8   2  24  135.99    1.84 
  -8  -2  26    1.57    0.15 
  -8   2  26    1.43    0.11 
  -8   2  26    1.55    0.13 
  -8  -2  28   10.19    0.33 
  -8   2  28   10.00    0.31 
  -8   2  28   10.09    0.27 
  -8  -2  30   35.08    0.71 
  -8   2  30   35.27    0.62 
  -8   2  30   34.15    0.68 
  -8  -2  32   17.89    0.48 
  -8   2  32   17.11    0.45 
  -8  -2  34    7.51    0.32 
  -8   2  34    7.40    0.30 
  -8  -2  36    5.43    0.28 
  -8   2  36    5.68    0.27 
  -8   2  38   16.11    0.47 
   8  -3  35    9.68    0.54 
   8  -3  33    0.23    0.10 
   8   3  33    0.17    0.09 
   8  -3  31   18.40    0.49 
   8   3  31   18.82    0.50 
  -8  -3 -29   14.42    0.36 
   8  -3  29   13.78    0.40 
   8   3  29   13.86    0.41 
  -8  -3 -27    6.39    0.23 
   8  -3  27    6.46    0.26 
   8   3  27    6.31    0.26 
  -8  -3 -25   44.45    0.76 
   8  -3  25   45.29    0.81 
   8   3  25   44.73    0.81 
   8  -3  23    3.46    0.17 
   8  -3  23    3.66    0.18 
  -8  -3 -23    3.73    0.17 
   8   3  23    3.76    0.19 
  -8  -3 -21   54.41    0.86 
   8  -3  21   53.50    0.88 
   8  -3  21   55.03    0.86 
   8   3  21   54.72    0.90 
  -8  -3 -19   57.24    0.89 
   8  -3  19   58.27    0.89 
   8  -3  19   57.69    0.91 
   8   3  19   57.05    0.92 
   8  -3  17    3.28    0.15 
   8  -3  17    3.33    0.15 
  -8  -3 -17    3.38    0.15 
   8   3  17    3.05    0.15 
   8  -3  15   89.40    1.25 
   8  -3  15   89.33    1.26 
  -8  -3 -15   86.86    1.24 
  -8   3 -15   86.89    1.16 
   8   3  15   86.59    1.27 
   8  -3  13   24.28    0.44 
   8  -3  13   23.74    0.42 
  -8  -3 -13   23.89    0.43 
  -8   3 -13   23.31    0.37 
   8  -3  11   66.36    0.98 
  -8  -3 -11   67.95    0.97 
   8  -3  11   67.35    0.95 
  -8   3 -11   68.18    0.91 
   8  -3   9   75.39    1.02 
   8  -3   9   72.73    1.06 
  -8  -3  -9   74.99    1.05 
  -8   3  -9   72.89    0.99 
  -8  -3  -7    6.68    0.17 
   8  -3   7    6.71    0.19 
   8  -3   7    6.93    0.15 
  -8   3  -7    7.12    0.15 
  -8  -3  -5  185.83    2.51 
   8  -3   5  187.47    2.44 
   8  -3   5  190.24    2.49 
  -8   3  -5  184.48    2.44 
   8  -3   3   39.74    0.54 
   8  -3   3   40.24    0.62 
  -8  -3  -3   39.35    0.60 
  -8   3  -3   41.34    0.58 
   8  -3   1   65.05    0.94 
   8  -3   1   66.90    0.84 
  -8  -3  -1   65.58    0.91 
  -8   3  -1   67.33    0.91 
  -8  -3   1  135.27    1.78 
   8  -3  -1  140.26    1.82 
  -8   3   1  136.87    1.79 
   8  -3  -3    0.91    0.07 
  -8  -3   3    0.85    0.06 
  -8   3   3    0.78    0.06 
  -8  -3   5  119.26    1.57 
   8  -3  -5  122.07    1.61 
  -8   3   5  120.64    1.60 
   8  -3  -7   64.55    0.92 
  -8  -3   7   65.26    0.88 
  -8  -3   7   66.25    0.93 
  -8   3   7   64.78    0.92 
  -8   3   7   64.20    0.83 
  -8  -3   9    7.20    0.19 
  -8  -3   9    7.46    0.15 
  -8   3   9    7.78    0.14 
  -8   3   9    7.49    0.18 
  -8  -3  11   59.33    0.80 
  -8  -3  11   60.20    0.87 
  -8   3  11   58.47    0.80 
  -8   3  11   58.94    0.86 
  -8  -3  13    5.44    0.12 
  -8  -3  13    5.25    0.17 
  -8   3  13    5.21    0.14 
  -8   3  13    5.56    0.17 
  -8  -3  15    0.20    0.03 
  -8  -3  15    0.05    0.05 
  -8   3  15    0.04    0.04 
  -8   3  15    0.11    0.04 
  -8  -3  17    3.37    0.09 
  -8  -3  17    3.30    0.15 
  -8   3  17    3.31    0.14 
  -8   3  17    3.47    0.13 
  -8  -3  19    0.55    0.08 
  -8   3  19    0.55    0.07 
  -8   3  19    0.69    0.08 
  -8  -3  21    0.33    0.08 
  -8   3  21    0.36    0.07 
  -8   3  21    0.40    0.07 
  -8  -3  23    0.08    0.06 
  -8   3  23    0.09    0.05 
  -8   3  23   -0.01    0.04 
  -8  -3  25    0.09    0.07 
  -8   3  25    0.25    0.07 
  -8   3  25    0.11    0.05 
  -8  -3  27    3.91    0.21 
  -8   3  27    3.78    0.18 
  -8   3  27    3.74    0.17 
  -8  -3  29    0.06    0.08 
  -8   3  29    0.05    0.07 
  -8   3  29    0.11    0.06 
  -8  -3  31    4.32    0.25 
  -8   3  31    4.36    0.20 
  -8   3  31    4.78    0.23 
  -8  -3  33    4.00    0.24 
  -8   3  33    4.50    0.23 
  -8  -3  35    1.10    0.16 
   8  -4  34    0.13    0.10 
   8  -4  32    1.56    0.17 
   8   4  32    1.70    0.18 
  -8  -4 -30    7.43    0.27 
   8  -4  30    7.40    0.30 
   8   4  30    7.37    0.30 
   8  -4  28    0.17    0.09 
  -8  -4 -28    0.13    0.07 
   8   4  28    0.13    0.08 
   8  -4  26    4.35    0.22 
  -8  -4 -26    4.83    0.20 
   8  -4  26    4.31    0.20 
   8   4  26    4.94    0.23 
   8  -4  24    8.46    0.27 
   8  -4  24    8.50    0.29 
  -8  -4 -24    8.93    0.27 
   8   4  24    8.96    0.30 
   8  -4  22    6.30    0.23 
   8  -4  22    6.29    0.23 
  -8  -4 -22    6.11    0.21 
   8   4  22    5.79    0.23 
   8  -4  20    0.21    0.06 
  -8  -4 -20    0.35    0.07 
   8  -4  20    0.24    0.07 
   8   4  20    0.29    0.07 
   8  -4  18   10.83    0.28 
   8  -4  18   10.59    0.29 
  -8  -4 -18   10.40    0.28 
  -8  -4 -16    1.80    0.12 
   8  -4  16    2.01    0.12 
   8  -4  16    1.97    0.13 
  -8  -4 -14    5.56    0.18 
   8  -4  14    5.40    0.19 
   8  -4  14    5.51    0.18 
   8  -4  12    0.68    0.07 
   8  -4  12    0.73    0.09 
  -8  -4 -12    0.65    0.08 
  -8   4 -12    0.76    0.05 
   8  -4  10   21.80    0.38 
   8  -4  10   22.55    0.43 
  -8  -4 -10   21.89    0.41 
  -8   4 -10   22.31    0.35 
  -8  -4  -8   56.80    0.84 
   8  -4   8   54.99    0.79 
   8  -4   8   56.98    0.86 
  -8   4  -8   56.48    0.78 
   8  -4   6    0.17    0.03 
   8  -4   6    0.08    0.04 
  -8  -4  -6    0.23    0.05 
  -8   4  -6    0.13    0.03 
   8  -4   4   19.23    0.29 
  -8  -4  -4   19.27    0.35 
   8  -4   4   18.78    0.37 
  -8   4  -4   19.57    0.32 
   8  -4   2   36.79    0.49 
  -8  -4  -2   36.66    0.57 
   8  -4   2   36.99    0.59 
  -8   4  -2   37.21    0.55 
  -8  -4   0    6.69    0.16 
   8  -4   0    6.55    0.19 
  -8   4   0    6.56    0.16 
   8  -4  -2    0.13    0.04 
  -8  -4   2    0.11    0.03 
  -8   4   2    0.08    0.03 
   8  -4  -4   86.45    1.19 
  -8  -4   4   84.14    1.15 
  -8   4   4   86.99    1.18 
  -8  -4   6    4.82    0.15 
  -8  -4   6    4.87    0.13 
   8  -4  -6    4.71    0.15 
  -8   4   6    4.67    0.15 
  -8  -4   8    1.03    0.06 
   8  -4  -8    1.10    0.09 
  -8  -4   8    0.98    0.08 
  -8   4   8    1.12    0.08 
  -8  -4  10   42.95    0.68 
  -8  -4  10   42.51    0.60 
  -8   4  10   42.68    0.66 
  -8   4  10   41.74    0.58 
  -8  -4  12   55.97    0.75 
  -8  -4  12   54.60    0.84 
  -8   4  12   55.50    0.83 
  -8   4  12   55.06    0.76 
  -8  -4  14    1.21    0.10 
  -8  -4  14    1.14    0.06 
  -8   4  14    1.15    0.07 
  -8   4  14    1.12    0.09 
  -8  -4  16    3.89    0.16 
  -8   4  16    3.90    0.13 
  -8   4  16    3.92    0.15 
  -8  -4  18   34.81    0.62 
  -8   4  18   34.26    0.55 
  -8   4  18   33.80    0.59 
  -8  -4  20    0.89    0.10 
  -8   4  20    1.04    0.10 
  -8   4  20    1.02    0.09 
  -8  -4  22    1.13    0.12 
  -8   4  22    1.47    0.12 
  -8   4  22    1.21    0.11 
  -8  -4  24   37.14    0.71 
  -8   4  24   38.08    0.66 
  -8   4  24   38.61    0.67 
  -8  -4  26    4.38    0.22 
  -8   4  26    4.41    0.19 
  -8  -4  28    0.07    0.08 
  -8   4  28    0.23    0.07 
  -8  -4  30   10.26    0.36 
  -8   4  30   10.72    0.32 
  -8  -4  32    5.86    0.29 
  -8   4  32    5.30    0.23 
  -8  -4  34    0.04    0.10 
  -8   4  34    0.04    0.08 
   8  -5  33    1.49    0.17 
  -8  -5 -33    1.11    0.14 
  -8  -5 -31   18.53    0.47 
   8  -5  31   18.98    0.50 
  -8  -5 -29    8.33    0.29 
   8  -5  29    8.89    0.33 
   8  -5  27   11.28    0.34 
   8  -5  27   11.98    0.37 
  -8  -5 -27   11.96    0.34 
  -8  -5 -25   37.37    0.70 
   8  -5  25   36.60    0.70 
   8  -5  25   37.58    0.71 
   8  -5  23    0.14    0.07 
  -8  -5 -23   -0.01    0.05 
   8  -5  23    0.09    0.07 
  -8  -5 -21   65.64    1.03 
   8  -5  21   64.11    1.03 
   8  -5  21   64.29    1.04 
   8  -5  19   26.41    0.54 
  -8  -5 -19   26.60    0.52 
   8  -5  19   26.16    0.51 
  -8  -5 -17   25.19    0.50 
   8  -5  17   25.03    0.51 
   8  -5  17   25.00    0.48 
   8  -5  15  119.29    1.63 
   8  -5  15  117.10    1.68 
  -8  -5 -15  117.78    1.66 
  -8  -5 -13    9.54    0.26 
   8  -5  13    9.43    0.24 
   8  -5  13    9.38    0.27 
   8  -5  11   73.66    1.10 
   8  -5  11   72.09    1.03 
  -8  -5 -11   72.63    1.07 
   8  -5   9   92.11    1.33 
   8  -5   9   92.52    1.25 
  -8  -5  -9   92.10    1.30 
  -8   5  -9   91.95    1.23 
   8  -5   7    4.65    0.13 
  -8  -5  -7    4.35    0.16 
   8  -5   7    4.63    0.18 
  -8   5  -7    4.31    0.13 
   8  -5   5   99.06    1.40 
  -8  -5  -5   97.78    1.36 
   8  -5   5   99.58    1.29 
  -8   5  -5   99.04    1.32 
  -8  -5  -3   31.95    0.52 
   8  -5   3   32.40    0.55 
   8  -5   3   30.34    0.44 
  -8   5  -3   31.32    0.49 
   8  -5   1   37.98    0.62 
   8  -5   1   36.73    0.49 
  -8  -5  -1   37.95    0.58 
  -8   5  -1   36.97    0.57 
   8  -5  -1   56.37    0.85 
  -8  -5   1   57.40    0.81 
  -8   5   1   55.23    0.82 
  -8  -5   3    1.05    0.07 
   8  -5  -3    1.39    0.10 
  -8   5   3    1.22    0.08 
   8  -5  -5   18.84    0.37 
  -8  -5   5   18.83    0.33 
  -8   5   5   19.43    0.36 
   8  -5  -7    6.65    0.19 
  -8  -5   7    6.54    0.16 
  -8  -5   7    6.61    0.20 
  -8   5   7    6.33    0.18 
  -8  -5   9    6.41    0.20 
   8  -5  -9    6.26    0.19 
  -8  -5   9    6.26    0.15 
  -8   5   9    6.41    0.19 
  -8  -5  11   18.17    0.38 
   8  -5 -11   18.86    0.36 
  -8  -5  11   18.74    0.30 
  -8   5  11   18.26    0.37 
  -8  -5  13    0.08    0.05 
  -8  -5  13    0.13    0.04 
  -8   5  13    0.01    0.04 
  -8  -5  15    1.76    0.12 
  -8   5  15    1.64    0.11 
  -8  -5  17    3.10    0.16 
  -8   5  17    2.94    0.14 
  -8  -5  19    0.68    0.09 
  -8   5  19    0.77    0.09 
  -8  -5  21    0.38    0.08 
  -8   5  21    0.48    0.08 
  -8  -5  23    0.48    0.10 
  -8   5  23    0.38    0.08 
  -8  -5  25    1.49    0.15 
  -8   5  25    1.70    0.14 
  -8  -5  27    1.51    0.16 
  -8   5  27    1.47    0.14 
  -8  -5  29    4.14    0.24 
  -8   5  29    3.87    0.20 
  -8  -5  31   11.84    0.40 
  -8   5  31   11.32    0.35 
  -8  -5  33    1.50    0.19 
  -8   5  33    1.71    0.16 
  -8   5  35    8.13    0.30 
  -8  -6 -32    0.06    0.08 
   8  -6  32   -0.10    0.09 
   8  -6  30    0.41    0.11 
  -8  -6 -30    0.34    0.09 
   8  -6  28    2.96    0.20 
  -8  -6 -28    3.28    0.20 
   8  -6  28    3.38    0.21 
  -8  -6 -26    1.13    0.13 
   8  -6  26    1.15    0.14 
   8  -6  26    1.32    0.14 
   8  -6  24    0.89    0.12 
   8  -6  24    0.94    0.13 
  -8  -6 -24    0.78    0.11 
  -8  -6 -22    7.28    0.26 
   8  -6  22    7.32    0.26 
   8  -6  22    6.45    0.27 
   8  -6  20    1.09    0.12 
  -8  -6 -20    1.48    0.14 
   8  -6  20    1.58    0.14 
   8  -6  18    2.56    0.15 
  -8  -6 -18    2.10    0.14 
   8  -6  18    2.20    0.16 
  -8  -6 -16    2.07    0.13 
   8  -6  16    2.24    0.14 
   8  -6  16    2.41    0.16 
   8  -6  14    0.00    0.05 
   8  -6  14   -0.05    0.05 
  -8  -6 -14   -0.01    0.04 
  -8  -6 -12    0.71    0.09 
   8  -6  12    0.73    0.10 
   8  -6  12    0.73    0.08 
  -8  -6 -10   11.89    0.30 
   8  -6  10   12.14    0.26 
   8  -6  10   11.53    0.32 
   8  -6   8    0.31    0.07 
  -8  -6  -8    0.31    0.06 
   8  -6   8    0.19    0.05 
  -8   6  -8    0.28    0.04 
  -8  -6  -6    9.76    0.25 
   8  -6   6    9.98    0.20 
   8  -6   6   10.04    0.28 
  -8   6  -6    9.71    0.21 
  -8  -6  -4    8.63    0.23 
   8  -6   4    8.04    0.24 
  -8   6  -4    8.57    0.20 
   8  -6   2    4.00    0.17 
  -8  -6  -2    4.09    0.15 
  -8   6  -2    4.20    0.14 
   8  -6   0    5.49    0.20 
  -8  -6   0    5.86    0.17 
  -8   6   0    5.65    0.17 
   8  -6  -2   10.85    0.27 
  -8  -6   2   10.79    0.24 
  -8   6   2   11.23    0.26 
   8  -6  -4    0.46    0.07 
  -8  -6   4    0.47    0.06 
  -8   6   4    0.65    0.07 
  -8  -6   6    0.17    0.04 
   8  -6  -6    0.25    0.06 
  -8  -6   6    0.12    0.05 
  -8   6   6    0.08    0.04 
  -8  -6   8   21.66    0.43 
  -8  -6   8   21.57    0.36 
   8  -6  -8   21.31    0.41 
  -8   6   8   21.23    0.42 
  -8  -6  10    0.54    0.08 
   8  -6 -10    0.26    0.06 
  -8  -6  10    0.23    0.04 
  -8   6  10    0.14    0.05 
   8  -6 -12    3.16    0.14 
  -8  -6  12    3.32    0.16 
  -8   6  12    2.95    0.14 
  -8  -6  14    9.20    0.27 
  -8   6  14    9.32    0.26 
  -8  -6  16    3.87    0.18 
  -8   6  16    3.69    0.17 
  -8  -6  18    3.20    0.18 
  -8   6  18    3.37    0.17 
  -8  -6  20    8.04    0.28 
  -8   6  20    7.98    0.26 
  -8  -6  22   10.77    0.34 
  -8   6  22   10.48    0.31 
  -8  -6  24    0.03    0.08 
  -8   6  24    0.00    0.06 
  -8  -6  26    2.87    0.21 
  -8   6  26    2.93    0.18 
  -8  -6  28    8.80    0.33 
  -8   6  28    8.89    0.30 
  -8  -6  30    0.78    0.15 
  -8   6  30    0.76    0.12 
  -8  -6  32    1.23    0.20 
  -8   6  32    1.31    0.15 
  -8  -7 -29    9.85    0.35 
   8  -7  29    9.34    0.35 
   8  -7  27    1.35    0.16 
  -8  -7 -27    1.52    0.16 
  -8  -7 -25   25.03    0.57 
   8  -7  25   25.84    0.79 
   8  -7  25   25.05    0.59 
  -8  -7 -23    1.14    0.13 
   8  -7  23    1.08    0.20 
   8  -7  23    1.08    0.14 
   8  -7  21   29.32    0.64 
  -8  -7 -21   29.56    0.61 
   8  -7  21   29.91    0.78 
   8  -7  19   21.21    0.51 
  -8  -7 -19   21.17    0.48 
  -8  -7 -17    5.82    0.23 
   8  -7  17    6.12    0.26 
  -8  -7 -15   52.30    0.88 
   8  -7  15   52.56    0.91 
  -8  -7 -13    7.47    0.25 
   8  -7  13    8.23    0.29 
  -8  -7 -11   33.46    0.62 
   8  -7  11   34.60    0.66 
  -8  -7  -9   42.34    0.73 
   8  -7   9   44.42    0.77 
  -8  -7  -7    4.96    0.19 
   8  -7   7    5.35    0.22 
  -8  -7  -5   73.74    1.09 
   8  -7   5   73.48    1.14 
  -8   7  -5   73.61    1.04 
  -8  -7  -3   17.01    0.35 
   8  -7   3   16.81    0.39 
  -8   7  -3   16.47    0.33 
  -8  -7  -1   31.61    0.54 
   8  -7   1   32.66    0.59 
  -8   7  -1   31.29    0.53 
  -8  -7   1   39.86    0.64 
   8  -7  -1   40.18    0.69 
  -8   7   1   39.38    0.64 
  -8  -7   3    0.16    0.04 
   8  -7  -3    0.07    0.05 
  -8   7   3    0.01    0.04 
  -8  -7   5   24.44    0.48 
   8  -7  -5   23.90    0.47 
  -8  -7   5   24.25    0.42 
  -8   7   5   25.13    0.47 
  -8  -7   7    7.37    0.19 
   8  -7  -7    7.73    0.23 
  -8  -7   7    7.41    0.23 
  -8   7   7    7.51    0.23 
  -8  -7   9    6.37    0.22 
   8  -7  -9    6.77    0.22 
  -8   7   9    6.47    0.21 
   8  -7 -11   18.52    0.38 
  -8  -7  11   18.31    0.41 
  -8   7  11   17.62    0.39 
   8  -7 -13    0.22    0.06 
  -8  -7  13    0.25    0.08 
  -8   7  13    0.24    0.06 
  -8  -7  15    2.08    0.15 
  -8   7  15    2.28    0.15 
  -8  -7  17    0.35    0.09 
  -8   7  17    0.27    0.07 
  -8  -7  19   -0.01    0.07 
  -8   7  19    0.10    0.06 
  -8  -7  21    0.22    0.08 
  -8   7  21    0.37    0.09 
  -8  -7  23    0.61    0.12 
  -8   7  23    0.76    0.11 
  -8  -7  25   -0.02    0.08 
  -8   7  25    0.10    0.08 
  -8  -7  27    2.32    0.19 
  -8   7  27    2.76    0.19 
  -8  -7  29   -0.11    0.09 
  -8   7  29   -0.04    0.07 
  -8   7  31    4.11    0.34 
   8  -8  26   -0.03    0.08 
  -8  -8 -26   -0.05    0.07 
   8  -8  24   -0.03    0.09 
  -8  -8 -24   -0.05    0.07 
   8  -8  22    2.36    0.20 
  -8  -8 -22    2.33    0.18 
   8  -8  20    0.94    0.14 
  -8  -8 -20    0.93    0.12 
   8  -8  18    1.27    0.15 
  -8  -8 -18    1.38    0.14 
  -8  -8 -16    0.05    0.06 
   8  -8  16    0.05    0.07 
  -8  -8 -14    0.08    0.06 
   8  -8  14   -0.02    0.07 
  -8  -8 -12    4.46    0.20 
   8  -8  12    4.46    0.23 
   8  -8  10    2.93    0.19 
  -8  -8 -10    3.11    0.17 
  -8  -8  -8    2.58    0.15 
   8  -8   8    2.80    0.18 
  -8  -8  -6   17.57    0.39 
   8  -8   6   17.29    0.42 
  -8  -8  -4    5.26    0.19 
   8  -8   4    5.56    0.23 
   8  -8   2   14.33    0.37 
  -8  -8  -2   14.49    0.33 
  -8   8  -2   14.44    0.32 
   8  -8   0    3.07    0.17 
  -8  -8   0    2.96    0.14 
  -8   8   0    3.03    0.14 
  -8  -8   2   33.17    0.56 
   8  -8  -2   33.20    0.62 
  -8   8   2   32.96    0.58 
  -8  -8   4   10.70    0.30 
  -8  -8   4   10.88    0.26 
   8  -8  -4   11.13    0.30 
  -8   8   4   10.86    0.29 
  -8  -8   6    2.64    0.13 
   8  -8  -6    2.46    0.15 
  -8  -8   6    2.84    0.16 
  -8   8   6    2.78    0.15 
   8  -8  -8   74.99    1.14 
  -8  -8   8   75.16    1.16 
  -8   8   8   75.53    1.15 
  -8  -8  10    2.70    0.16 
   8  -8 -10    2.97    0.16 
  -8   8  10    3.28    0.17 
  -8  -8  12    7.49    0.26 
  -8   8  12    7.10    0.25 
  -8  -8  14   45.09    0.81 
  -8   8  14   46.51    0.81 
  -8  -8  16    3.11    0.18 
  -8   8  16    3.37    0.19 
  -8  -8  18   39.01    0.74 
  -8   8  18   37.34    0.72 
  -8  -8  20   24.47    0.56 
  -8   8  20   24.49    0.55 
  -8  -8  22   15.32    0.44 
  -8   8  22   16.39    0.43 
  -8  -8  24   13.89    0.42 
  -8   8  24   13.48    0.40 
  -8  -8  26    3.06    0.22 
  -8   8  26    2.74    0.20 
   8  -9  23    0.16    0.10 
  -8  -9 -21    6.17    0.27 
   8  -9  21    6.12    0.30 
  -8  -9 -19    0.88    0.12 
   8  -9  19    0.82    0.14 
   8  -9  17    0.23    0.09 
  -8  -9 -17    0.29    0.09 
   8  -9  15    3.31    0.22 
  -8  -9 -15    3.62    0.21 
   8  -9  13    0.34    0.10 
  -8  -9 -13    0.33    0.09 
   8  -9  11    2.25    0.18 
  -8  -9 -11    2.12    0.16 
  -8  -9  -9    1.87    0.15 
   8  -9   9    1.75    0.17 
   8  -9   7    3.00    0.20 
  -8  -9  -7    3.06    0.17 
  -8  -9  -5    5.98    0.22 
   8  -9   5    6.54    0.27 
  -8  -9  -3    0.88    0.10 
   8  -9   3    0.93    0.12 
   8  -9   1    3.81    0.20 
  -8  -9  -1    4.00    0.17 
  -8   9  -1    3.98    0.18 
   8  -9  -1    1.06    0.12 
  -8  -9   1    1.12    0.10 
  -8   9   1    1.02    0.10 
  -8  -9   3    0.36    0.07 
   8  -9  -3    0.27    0.08 
  -8  -9   3    0.41    0.08 
  -8   9   3    0.36    0.08 
   8  -9  -5    1.53    0.14 
  -8  -9   5    1.53    0.13 
  -8   9   5    1.51    0.13 
  -8  -9   7    0.27    0.08 
   8  -9  -7    0.42    0.09 
  -8   9   7    0.23    0.07 
   8  -9  -9    1.31    0.12 
  -8  -9   9    1.61    0.14 
  -8   9   9    1.42    0.14 
  -8  -9  11    1.04    0.12 
  -8   9  11    1.01    0.11 
  -8  -9  13    0.42    0.09 
  -8   9  13    0.46    0.09 
  -8  -9  15   -0.05    0.06 
  -8   9  15    0.05    0.07 
  -8  -9  17    0.96    0.13 
  -8   9  17    0.60    0.10 
  -8  -9  19    0.03    0.08 
  -8   9  19    0.16    0.08 
  -8  -9  21    0.10    0.09 
  -8   9  21    0.14    0.08 
  -8  -9  23    1.06    0.15 
  -8   9  23    0.89    0.13 
  -8  -9  25    0.04    0.09 
  -8 -10 -18    0.52    0.11 
   8 -10  18    0.47    0.13 
  -8 -10 -16   -0.08    0.06 
   8 -10  16   -0.02    0.09 
   8 -10  14    0.07    0.09 
  -8 -10 -14    0.04    0.07 
   8 -10  12    1.08    0.15 
  -8 -10 -12    0.98    0.13 
  -8 -10 -10    0.60    0.11 
   8 -10  10    0.45    0.12 
   8 -10   8    0.79    0.13 
  -8 -10  -8    0.77    0.11 
  -8 -10  -6    4.78    0.21 
   8 -10   6    4.70    0.25 
   8 -10   4    2.43    0.19 
  -8 -10  -4    2.22    0.16 
  -8 -10  -2    9.01    0.28 
   8 -10   2    9.57    0.33 
   8 -10   0    1.71    0.16 
  -8 -10   0    1.55    0.14 
  -8 -10   0    1.64    0.13 
  -8 -10   2   13.23    0.36 
   8 -10  -2   12.25    0.36 
  -8  10   2   12.58    0.34 
   8 -10  -4    6.14    0.26 
  -8 -10   4    6.62    0.25 
  -8  10   4    6.28    0.23 
  -8 -10   6    2.97    0.19 
   8 -10  -6    3.12    0.20 
  -8  10   6    3.29    0.18 
  -8 -10   8   41.87    0.78 
  -8  10   8   42.36    0.77 
  -8 -10  10    6.30    0.26 
  -8  10  10    6.44    0.26 
  -8 -10  12    8.21    0.30 
  -8  10  12    8.03    0.29 
  -8 -10  14   37.59    0.74 
  -8  10  14   35.61    0.72 
  -8 -10  16    0.06    0.08 
  -8  10  16    0.18    0.08 
  -8 -10  18   23.51    0.57 
  -8  10  18   23.74    0.56 
  -8 -10  20   17.77    0.49 
  -8  10  20   18.38    0.54 
  -8 -10  22    6.38    0.45 
  -8 -11 -13    0.05    0.08 
   8 -11  13   -0.17    0.15 
   8 -11  11    1.02    0.15 
  -8 -11 -11    1.22    0.14 
   8 -11   9    0.88    0.15 
  -8 -11  -9    0.89    0.13 
  -8 -11  -7    0.11    0.08 
   8 -11   7    0.19    0.10 
   8 -11   5    2.10    0.20 
  -8 -11  -5    1.94    0.17 
   8 -11   3    0.70    0.13 
  -8 -11  -3    0.59    0.10 
  -8 -11  -1    0.04    0.07 
   8 -11   1    0.04    0.09 
   8 -11  -1    1.76    0.17 
  -8 -11   1    2.01    0.16 
  -8 -11   3    0.23    0.09 
   8 -11  -3    0.05    0.09 
  -8 -11   5    0.99    0.13 
  -8 -11   7    1.87    0.17 
  -8  11   7    1.73    0.16 
  -8 -11   9    0.61    0.12 
  -8  11   9    0.58    0.11 
  -8 -11  11    0.18    0.09 
  -8  11  11    0.29    0.09 
  -8 -11  13    2.20    0.19 
  -8  11  13    2.15    0.17 
  -8 -11  15    0.12    0.10 
  -8  11  15    0.32    0.10 
  -8 -11  17    0.18    0.11 
  -8 -12  -8    1.57    0.16 
   8 -12   4    0.83    0.14 
   8 -12   2    8.89    0.36 
   8 -12   0    3.58    0.24 
   8 -12  -2    5.19    0.34 
  -8  12  10    4.21    0.26 
   9   0  35    0.09    0.10 
   9   0  33    0.10    0.09 
   9   0  31   -0.01    0.07 
   9   0  29    0.08    0.08 
   9   0  27    0.01    0.07 
   9   0  25   -0.03    0.06 
   9   0  23    0.07    0.07 
  -9   0 -23    0.02    0.04 
  -9   0 -21   -0.03    0.03 
   9   0  21    0.04    0.05 
   9   0  19    0.00    0.05 
  -9   0 -19    0.11    0.04 
   9   0  17    0.01    0.04 
   9   0  17    0.00    0.04 
  -9   0 -17    0.04    0.04 
   9   0  15   -0.08    0.04 
   9   0  15    0.03    0.04 
  -9   0 -15    0.00    0.03 
   9   0  13    0.06    0.04 
  -9   0 -13    0.00    0.03 
   9   0  13    0.05    0.03 
   9   0  11    0.00    0.03 
  -9   0 -11   -0.01    0.03 
   9   0  11    0.00    0.03 
  -9   0  -9    0.01    0.03 
   9   0   9   -0.02    0.03 
   9   0   9    0.01    0.03 
  -9   0  -7   -0.01    0.02 
   9   0   7   -0.01    0.03 
   9   0   7   -0.02    0.02 
  -9   0  -5   -0.29    0.03 
  -9   0  -3    0.00    0.03 
  -9   0  -1   -0.03    0.02 
  -9   0   1   -0.07    0.02 
  -9   0   3   -0.02    0.02 
  -9   0   5   -0.14    0.02 
  -9   0   5   -0.12    0.03 
  -9   0   7    0.00    0.02 
  -9   0   7    0.04    0.03 
  -9   0   9    0.11    0.03 
  -9   0   9    0.04    0.03 
  -9   0  11    0.28    0.04 
  -9   0  11    0.04    0.03 
  -9   0  13    0.05    0.03 
  -9   0  13   -0.03    0.02 
  -9   0  15    0.15    0.04 
  -9   0  15    0.04    0.04 
  -9   0  17    0.04    0.04 
  -9   0  17    0.06    0.03 
  -9   0  19    0.06    0.05 
  -9   0  19    0.13    0.04 
  -9   0  21    0.06    0.06 
  -9   0  21    0.05    0.04 
  -9   0  23    0.07    0.06 
  -9   0  23    0.06    0.04 
  -9   0  25    0.11    0.06 
  -9   0  25    0.05    0.04 
  -9   0  27    0.05    0.07 
  -9   0  29   -0.02    0.07 
  -9   0  31    0.07    0.07 
  -9   0  33    0.06    0.08 
  -9   0  35    0.02    0.09 
  -9   0  37    0.16    0.10 
   9  -1  34   14.43    0.45 
   9   1  34   13.99    0.44 
   9  -1  32    0.19    0.09 
   9   1  32    0.03    0.07 
   9  -1  30    1.04    0.14 
   9   1  30    0.95    0.13 
   9  -1  28   33.21    0.68 
   9   1  28   34.21    0.69 
   9  -1  26    1.84    0.15 
   9   1  26    1.58    0.16 
  -9  -1 -24    6.73    0.21 
   9  -1  24    7.00    0.25 
   9   1  24    6.51    0.25 
  -9  -1 -22   96.47    1.35 
   9  -1  22   95.02    1.41 
   9   1  22   94.94    1.42 
   9  -1  20   48.66    0.74 
  -9  -1 -20   47.32    0.74 
   9  -1  20   48.30    0.80 
  -9   1 -20   48.47    0.72 
   9   1  20   47.97    0.80 
  -9  -1 -18   35.44    0.57 
   9  -1  18   34.70    0.61 
   9  -1  18   36.17    0.57 
   9   1  18   34.69    0.61 
  -9   1 -18   35.07    0.55 
   9  -1  16   43.47    0.66 
   9  -1  16   42.86    0.69 
  -9  -1 -16   42.48    0.66 
  -9   1 -16   42.58    0.64 
   9   1  16   42.23    0.70 
   9  -1  14  108.27    1.49 
   9  -1  14  108.40    1.47 
  -9  -1 -14  108.20    1.47 
   9   1  14  108.54    1.50 
  -9   1 -14  108.30    1.44 
  -9  -1 -12   73.54    1.04 
   9  -1  12   74.46    1.05 
   9  -1  12   75.02    1.04 
   9   1  12   74.35    1.06 
  -9   1 -12   74.53    1.02 
   9  -1  10   26.22    0.43 
  -9  -1 -10   26.32    0.43 
   9  -1  10   26.50    0.44 
   9   1  10   26.40    0.45 
  -9   1 -10   26.29    0.42 
   9  -1   8  481.22    6.48 
  -9  -1  -8  482.66    6.51 
   9  -1   8  491.48    6.55 
  -9   1  -8  483.91    6.51 
   9  -1   6    7.91    0.17 
   9  -1   6    8.18    0.19 
  -9  -1  -6    8.27    0.18 
  -9   1  -6    8.02    0.17 
   9  -1   4   28.52    0.46 
  -9  -1  -4   28.74    0.44 
  -9   1  -4   27.77    0.43 
  -9  -1  -2  395.94    5.35 
  -9   1  -2  383.54    5.30 
  -9  -1   0    3.83    0.11 
  -9   1   0    3.83    0.11 
  -9  -1   2   66.11    0.89 
  -9   1   2   64.34    0.89 
  -9  -1   4  140.57    1.89 
  -9   1   4  133.12    1.82 
  -9   1   4  132.48    1.76 
  -9  -1   6   90.99    1.20 
  -9  -1   6   87.49    1.19 
  -9   1   6   91.15    1.21 
  -9   1   6   90.36    1.17 
  -9  -1   8  131.40    1.70 
  -9  -1   8  129.49    1.69 
  -9   1   8  128.90    1.67 
  -9   1   8  129.93    1.70 
  -9  -1  10   87.06    1.17 
  -9  -1  10   86.58    1.15 
  -9   1  10   85.99    1.15 
  -9   1  10   85.37    1.17 
  -9  -1  12  191.48    2.45 
  -9  -1  12  185.68    2.41 
  -9   1  12  191.26    2.56 
  -9   1  12  187.22    2.44 
  -9  -1  14   27.76    0.43 
  -9  -1  14   27.02    0.46 
  -9   1  14   27.31    0.45 
  -9   1  14   27.70    0.45 
  -9  -1  16    1.57    0.08 
  -9  -1  16    1.51    0.10 
  -9   1  16    1.52    0.09 
  -9   1  16    1.52    0.10 
  -9  -1  18   60.77    0.91 
  -9  -1  18   59.79    0.83 
  -9   1  18   58.09    0.86 
  -9   1  18   59.00    0.89 
  -9  -1  20    0.12    0.05 
  -9  -1  20    0.20    0.04 
  -9   1  20    0.22    0.05 
  -9   1  20    0.25    0.06 
  -9  -1  22    1.85    0.13 
  -9  -1  22    1.87    0.09 
  -9   1  22    2.04    0.11 
  -9   1  22    2.12    0.13 
  -9  -1  24   63.17    1.01 
  -9   1  24   62.80    0.93 
  -9   1  24   63.42    1.00 
  -9  -1  26    0.85    0.11 
  -9   1  26    1.05    0.12 
  -9   1  26    0.89    0.09 
  -9  -1  28    2.27    0.16 
  -9   1  28    2.21    0.13 
  -9   1  28    2.37    0.17 
  -9  -1  30    4.65    0.24 
  -9   1  30    4.66    0.22 
  -9  -1  32    2.87    0.20 
  -9   1  32    2.88    0.19 
  -9  -1  34    7.26    0.31 
  -9   1  34    6.95    0.30 
  -9  -1  36    4.13    0.25 
  -9   1  36    4.13    0.24 
  -9   1  38   -0.02    0.09 
   9  -2  35    5.89    0.38 
   9  -2  33    1.08    0.15 
   9   2  33    1.38    0.16 
   9  -2  31   13.94    0.42 
   9   2  31   13.55    0.42 
   9  -2  29    2.27    0.18 
   9   2  29    2.25    0.18 
   9  -2  27    6.39    0.26 
  -9  -2 -27    6.57    0.22 
   9   2  27    6.73    0.27 
  -9  -2 -25   13.70    0.33 
   9  -2  25   13.42    0.37 
   9   2  25   13.94    0.38 
   9  -2  23    0.08    0.07 
  -9  -2 -23    0.00    0.05 
   9   2  23    0.10    0.07 
  -9  -2 -21    7.11    0.21 
   9  -2  21    6.61    0.23 
   9  -2  21    7.18    0.22 
   9   2  21    6.69    0.24 
  -9  -2 -19    0.09    0.04 
   9  -2  19    0.20    0.06 
   9  -2  19    0.11    0.06 
   9   2  19    0.09    0.06 
   9  -2  17    7.38    0.22 
   9  -2  17    7.49    0.21 
  -9  -2 -17    7.22    0.21 
  -9   2 -17    7.30    0.17 
   9   2  17    7.49    0.23 
   9  -2  15    6.43    0.19 
  -9  -2 -15    6.57    0.19 
   9  -2  15    6.33    0.20 
   9   2  15    6.52    0.21 
  -9   2 -15    6.77    0.16 
  -9  -2 -13    0.08    0.04 
   9  -2  13    0.04    0.04 
   9  -2  13    0.00    0.04 
  -9   2 -13    0.02    0.03 
   9   2  13    0.18    0.05 
  -9  -2 -11    3.63    0.13 
   9  -2  11    3.70    0.14 
   9  -2  11    3.50    0.13 
  -9   2 -11    3.85    0.11 
   9  -2   9    1.91    0.09 
   9  -2   9    1.78    0.10 
  -9  -2  -9    1.67    0.09 
  -9   2  -9    1.70    0.08 
   9  -2   7    0.05    0.03 
  -9  -2  -7    0.10    0.03 
   9  -2   7    0.08    0.04 
  -9   2  -7    0.04    0.03 
  -9  -2  -5    9.78    0.21 
   9  -2   5    9.98    0.18 
   9  -2   5    9.64    0.22 
  -9   2  -5    9.91    0.20 
   9  -2   3    7.39    0.14 
   9  -2   3    7.53    0.19 
  -9   2  -3    7.34    0.16 
   9  -2   1    0.58    0.06 
  -9   2  -1    0.49    0.05 
  -9   2   1    0.78    0.06 
   9  -2  -3    6.56    0.17 
  -9  -2   3    6.61    0.15 
  -9   2   3    6.52    0.16 
  -9   2   3    6.51    0.10 
  -9  -2   5   41.52    0.60 
  -9   2   5   42.14    0.62 
  -9   2   5   42.54    0.55 
  -9  -2   7    3.17    0.10 
  -9  -2   7    3.26    0.11 
  -9   2   7    3.24    0.08 
  -9   2   7    3.12    0.11 
  -9  -2   9   25.98    0.43 
  -9  -2   9   26.83    0.40 
  -9   2   9   26.51    0.39 
  -9   2   9   25.77    0.43 
  -9  -2  11   52.72    0.78 
  -9  -2  11   52.86    0.73 
  -9   2  11   52.12    0.73 
  -9   2  11   52.24    0.77 
  -9  -2  13    0.67    0.06 
  -9  -2  13    0.48    0.06 
  -9   2  13    0.63    0.06 
  -9   2  13    0.64    0.06 
  -9  -2  15   22.24    0.42 
  -9  -2  15   22.94    0.36 
  -9   2  15   21.95    0.39 
  -9   2  15   22.13    0.40 
  -9  -2  17   10.99    0.21 
  -9  -2  17   10.94    0.27 
  -9   2  17   10.91    0.25 
  -9   2  17   10.86    0.25 
  -9  -2  19   22.23    0.36 
  -9  -2  19   22.15    0.44 
  -9   2  19   21.86    0.41 
  -9   2  19   22.29    0.42 
  -9  -2  21   42.41    0.72 
  -9   2  21   42.40    0.67 
  -9   2  21   40.95    0.69 
  -9  -2  23    1.73    0.14 
  -9   2  23    1.72    0.13 
  -9   2  23    1.69    0.11 
  -9  -2  25   21.56    0.48 
  -9   2  25   21.91    0.43 
  -9   2  25   21.90    0.46 
  -9  -2  27   18.00    0.44 
  -9   2  27   17.61    0.38 
  -9   2  27   18.10    0.42 
  -9  -2  29    0.93    0.13 
  -9   2  29    0.94    0.12 
  -9   2  29    0.78    0.09 
  -9  -2  31   15.73    0.44 
  -9   2  31   15.93    0.42 
  -9  -2  33    2.06    0.20 
  -9   2  33    1.79    0.17 
  -9  -2  35    8.20    0.35 
  -9   2  35    8.39    0.32 
  -9   2  37    9.84    0.36 
   9  -3  34    6.01    0.29 
   9   3  34    6.48    0.43 
   9  -3  32    0.07    0.09 
   9   3  32   -0.04    0.08 
   9  -3  30    2.20    0.19 
   9   3  30    2.36    0.19 
  -9  -3 -28   16.21    0.39 
   9  -3  28   15.69    0.43 
   9   3  28   15.50    0.43 
   9  -3  26    0.59    0.11 
  -9  -3 -26    0.45    0.08 
   9   3  26    0.53    0.10 
   9  -3  24    0.10    0.06 
  -9  -3 -24    0.03    0.05 
   9  -3  24   -0.07    0.06 
   9   3  24   -0.02    0.07 
   9  -3  22   42.60    0.75 
   9  -3  22   42.86    0.72 
  -9  -3 -22   42.85    0.72 
   9   3  22   42.14    0.76 
  -9  -3 -20   25.38    0.48 
   9  -3  20   25.02    0.49 
   9  -3  20   24.75    0.49 
   9   3  20   23.97    0.50 
  -9  -3 -18    7.41    0.22 
   9  -3  18    7.07    0.23 
   9  -3  18    7.46    0.23 
   9   3  18    7.15    0.23 
   9  -3  16   33.76    0.59 
  -9  -3 -16   33.54    0.58 
   9  -3  16   34.19    0.58 
   9  -3  14   45.44    0.72 
   9  -3  14   45.55    0.71 
  -9  -3 -14   44.62    0.71 
  -9   3 -14   44.30    0.64 
   9  -3  12   16.43    0.32 
  -9  -3 -12   16.12    0.33 
   9  -3  12   16.49    0.34 
  -9   3 -12   16.01    0.28 
  -9  -3 -10   24.75    0.43 
   9  -3  10   24.62    0.41 
   9  -3  10   24.32    0.45 
  -9   3 -10   24.34    0.39 
   9  -3   8  180.85    2.51 
  -9  -3  -8  184.57    2.39 
   9  -3   8  186.96    2.41 
  -9   3  -8  179.44    2.34 
  -9  -3  -6    0.15    0.04 
   9  -3   6    0.15    0.03 
   9  -3   6    0.11    0.05 
  -9   3  -6    0.17    0.03 
  -9  -3  -4   20.42    0.36 
   9  -3   4   20.08    0.30 
   9  -3   4   20.81    0.38 
  -9   3  -4   20.48    0.34 
  -9  -3  -2  267.63    3.77 
   9  -3   2  266.84    3.81 
   9  -3   2  268.09    3.46 
  -9   3  -2  269.06    3.75 
  -9  -3   0    0.19    0.04 
   9  -3   0    0.18    0.04 
  -9   3   0    0.23    0.04 
   9  -3  -2    9.75    0.23 
  -9  -3   2    9.79    0.20 
  -9   3   2    9.97    0.21 
   9  -3  -4   84.24    1.19 
  -9  -3   4   85.49    1.15 
  -9   3   4   88.95    1.18 
  -9  -3   6   49.05    0.69 
  -9  -3   6   48.41    0.73 
   9  -3  -6   48.97    0.73 
  -9   3   6   49.07    0.62 
  -9   3   6   49.58    0.72 
  -9  -3   8   26.84    0.41 
  -9  -3   8   26.82    0.46 
  -9   3   8   27.18    0.45 
  -9   3   8   26.77    0.37 
  -9  -3  10   45.89    0.65 
  -9  -3  10   46.44    0.71 
  -9   3  10   45.38    0.63 
  -9   3  10   45.85    0.69 
  -9  -3  12  116.52    1.50 
  -9  -3  12  116.17    1.58 
  -9   3  12  114.49    1.56 
  -9   3  12  112.82    1.50 
  -9  -3  14    7.61    0.22 
  -9  -3  14    7.89    0.16 
  -9   3  14    7.86    0.18 
  -9   3  14    7.85    0.21 
  -9  -3  16    3.20    0.10 
  -9  -3  16    3.20    0.15 
  -9   3  16    3.23    0.14 
  -9   3  16    3.27    0.12 
  -9  -3  18   15.81    0.36 
  -9  -3  18   15.43    0.28 
  -9   3  18   15.89    0.32 
  -9   3  18   15.75    0.33 
  -9  -3  20    7.43    0.24 
  -9   3  20    7.53    0.21 
  -9   3  20    7.78    0.22 
  -9  -3  22    0.11    0.07 
  -9   3  22    0.16    0.06 
  -9   3  22    0.01    0.05 
  -9  -3  24   28.62    0.58 
  -9   3  24   29.71    0.55 
  -9   3  24   29.45    0.54 
  -9  -3  26    4.51    0.21 
  -9   3  26    4.39    0.18 
  -9   3  26    4.27    0.19 
  -9  -3  28    0.20    0.10 
  -9   3  28    0.19    0.07 
  -9   3  28    0.18    0.07 
  -9  -3  30    2.41    0.18 
  -9   3  30    2.37    0.15 
  -9   3  30    2.59    0.17 
  -9  -3  32    3.59    0.23 
  -9   3  32    3.44    0.18 
  -9  -3  34    4.34    0.26 
   9  -4  33    1.68    0.18 
   9   4  33    1.69    0.20 
   9  -4  31   25.39    0.59 
  -9  -4 -31   25.18    0.55 
   9   4  31   25.04    0.60 
  -9  -4 -29    6.96    0.26 
   9  -4  29    6.68    0.28 
   9   4  29    7.07    0.30 
  -9  -4 -27   11.73    0.33 
   9  -4  27   11.84    0.36 
   9   4  27   11.67    0.37 
   9  -4  25   27.89    0.57 
   9  -4  25   26.27    0.54 
  -9  -4 -25   26.55    0.54 
   9   4  25   25.98    0.57 
   9  -4  23    0.18    0.08 
  -9  -4 -23    0.03    0.06 
   9  -4  23    0.21    0.07 
   9   4  23    0.18    0.08 
   9  -4  21   29.86    0.57 
   9  -4  21   28.72    0.56 
  -9  -4 -21   28.81    0.55 
   9  -4  19    3.94    0.17 
  -9  -4 -19    4.03    0.17 
   9  -4  19    3.72    0.18 
   9  -4  17    3.82    0.18 
   9  -4  17    3.91    0.17 
  -9  -4 -17    4.05    0.17 
   9  -4  15   27.08    0.52 
   9  -4  15   27.94    0.49 
  -9  -4 -15   26.31    0.50 
   9  -4  13    1.76    0.12 
   9  -4  13    1.68    0.11 
  -9  -4 -13    1.72    0.11 
  -9   4 -13    1.75    0.08 
   9  -4  11    4.33    0.14 
  -9  -4 -11    4.03    0.15 
   9  -4  11    4.31    0.17 
  -9   4 -11    4.00    0.12 
   9  -4   9    9.32    0.20 
  -9  -4  -9    8.90    0.23 
   9  -4   9    9.25    0.25 
  -9   4  -9    9.31    0.19 
   9  -4   7    0.54    0.07 
   9  -4   7    0.63    0.06 
  -9  -4  -7    0.58    0.07 
  -9   4  -7    0.72    0.06 
   9  -4   5    0.38    0.06 
   9  -4   5    0.57    0.05 
  -9  -4  -5    0.44    0.06 
  -9   4  -5    0.38    0.05 
  -9  -4  -3    0.17    0.04 
   9  -4   3    0.14    0.02 
   9  -4   3    0.11    0.05 
  -9   4  -3    0.01    0.03 
  -9  -4  -1    0.93    0.07 
   9  -4   1    0.62    0.07 
  -9   4  -1    0.68    0.06 
   9  -4  -1    3.16    0.13 
  -9  -4   1    2.99    0.11 
  -9   4   1    2.90    0.11 
  -9  -4   3    5.08    0.14 
   9  -4  -3    5.07    0.16 
  -9   4   3    5.35    0.15 
  -9  -4   5   35.87    0.55 
   9  -4  -5   37.03    0.59 
  -9   4   5   37.56    0.58 
  -9  -4   7    7.08    0.19 
   9  -4  -7    6.91    0.20 
  -9  -4   7    7.16    0.16 
  -9   4   7    7.19    0.19 
  -9  -4   9   18.19    0.30 
  -9  -4   9   18.38    0.36 
  -9   4   9   17.74    0.26 
  -9   4   9   17.75    0.35 
  -9  -4  11   66.75    0.89 
  -9  -4  11   66.76    0.98 
  -9   4  11   63.86    0.96 
  -9   4  11   65.04    0.87 
  -9  -4  13    1.13    0.06 
  -9  -4  13    0.95    0.09 
  -9   4  13    0.98    0.08 
  -9   4  13    1.04    0.06 
  -9  -4  15   41.64    0.70 
  -9  -4  15   43.85    0.60 
  -9   4  15   42.49    0.63 
  -9   4  15   41.84    0.69 
  -9  -4  17   37.94    0.66 
  -9   4  17   38.61    0.59 
  -9   4  17   37.59    0.64 
  -9  -4  19   18.14    0.41 
  -9   4  19   18.17    0.38 
  -9   4  19   17.64    0.38 
  -9  -4  21   56.29    0.94 
  -9   4  21   58.44    0.91 
  -9  -4  23    6.13    0.24 
  -9   4  23    6.25    0.22 
  -9  -4  25   32.46    0.65 
  -9   4  25   33.17    0.61 
  -9  -4  27   33.60    0.69 
  -9   4  27   34.59    0.64 
  -9  -4  29    2.26    0.19 
  -9   4  29    2.20    0.15 
  -9  -4  31   37.06    0.77 
  -9   4  31   37.77    0.70 
  -9  -4  33    5.46    0.28 
  -9   4  33    6.12    0.25 
   9  -5  32    0.32    0.11 
  -9  -5 -32    0.33    0.09 
  -9  -5 -30    3.82    0.21 
   9  -5  30    4.23    0.24 
  -9  -5 -28    1.35    0.14 
   9  -5  28    1.55    0.17 
  -9  -5 -26    0.64    0.10 
   9  -5  26    0.53    0.10 
   9  -5  26    0.65    0.12 
  -9  -5 -24    3.42    0.18 
   9  -5  24    3.85    0.20 
   9  -5  24    3.42    0.19 
  -9  -5 -22    4.72    0.21 
   9  -5  22    4.74    0.22 
   9  -5  22    4.71    0.21 
  -9  -5 -20    2.34    0.15 
   9  -5  20    2.54    0.15 
   9  -5  20    2.29    0.16 
  -9  -5 -18    4.01    0.18 
   9  -5  18    4.10    0.19 
   9  -5  18    4.15    0.18 
  -9  -5 -16    4.75    0.19 
   9  -5  16    4.73    0.18 
   9  -5  16    4.87    0.20 
   9  -5  14    1.28    0.12 
   9  -5  14    1.33    0.11 
  -9  -5 -14    1.11    0.11 
  -9  -5 -12    7.76    0.23 
   9  -5  12    7.60    0.20 
   9  -5  12    7.80    0.25 
  -9  -5 -10    8.87    0.24 
   9  -5  10    9.21    0.27 
   9  -5  10    9.31    0.21 
  -9   5 -10    9.22    0.19 
   9  -5   8   13.89    0.33 
  -9  -5  -8   13.92    0.31 
   9  -5   8   14.09    0.26 
  -9   5  -8   13.84    0.26 
   9  -5   6   13.66    0.33 
   9  -5   6   14.52    0.25 
  -9  -5  -6   14.59    0.31 
  -9   5  -6   14.37    0.27 
  -9  -5  -4    0.27    0.06 
   9  -5   4    0.18    0.06 
   9  -5   4    0.32    0.04 
  -9   5  -4    0.27    0.04 
  -9  -5  -2   19.33    0.36 
   9  -5   2   18.81    0.27 
   9  -5   2   18.80    0.38 
  -9   5  -2   18.92    0.34 
   9  -5   0    0.35    0.06 
  -9  -5   0    0.48    0.06 
  -9   5   0    0.39    0.05 
   9  -5  -2    9.77    0.25 
  -9  -5   2    9.88    0.22 
  -9   5   2   10.32    0.23 
   9  -5  -4    2.38    0.13 
  -9  -5   4    2.37    0.10 
  -9   5   4    2.45    0.11 
   9  -5  -6    8.12    0.22 
  -9  -5   6    8.30    0.22 
  -9  -5   6    8.20    0.19 
  -9   5   6    8.33    0.22 
   9  -5  -8    4.24    0.16 
  -9  -5   8    4.17    0.12 
  -9  -5   8    4.37    0.16 
  -9   5   8    4.11    0.15 
  -9  -5  10    5.33    0.19 
  -9  -5  10    5.28    0.14 
   9  -5 -10    5.16    0.18 
  -9   5  10    5.35    0.18 
  -9  -5  12   13.89    0.25 
  -9  -5  12   13.74    0.32 
  -9   5  12   12.94    0.30 
  -9  -5  14    3.00    0.15 
  -9   5  14    2.51    0.13 
  -9  -5  16    1.22    0.11 
  -9   5  16    1.25    0.10 
  -9  -5  18   -0.02    0.05 
  -9   5  18    0.03    0.05 
  -9  -5  20    7.62    0.26 
  -9   5  20    7.29    0.24 
  -9  -5  22    0.34    0.08 
  -9   5  22    0.42    0.08 
  -9  -5  24    5.01    0.24 
  -9   5  24    5.40    0.22 
  -9  -5  26    2.25    0.18 
  -9   5  26    2.49    0.16 
  -9  -5  28    1.68    0.17 
  -9   5  28    1.93    0.15 
  -9  -5  30    0.37    0.11 
  -9   5  30    0.31    0.08 
  -9  -5  32    1.60    0.18 
  -9   5  32    1.97    0.17 
  -9   5  34    2.62    0.19 
  -9  -6 -31   17.78    0.47 
   9  -6  31   18.17    0.50 
   9  -6  29    5.95    0.28 
  -9  -6 -29    6.16    0.27 
   9  -6  27    8.22    0.32 
   9  -6  27    8.60    0.31 
  -9  -6 -27    8.79    0.31 
   9  -6  25   17.41    0.44 
   9  -6  25   17.15    0.45 
  -9  -6 -25   16.96    0.43 
  -9  -6 -23    0.48    0.10 
   9  -6  23    0.34    0.09 
   9  -6  23    0.46    0.10 
  -9  -6 -21   22.90    0.50 
   9  -6  21   22.07    0.51 
   9  -6  21   22.62    0.49 
  -9  -6 -19    3.40    0.18 
   9  -6  19    3.70    0.18 
   9  -6  19    3.31    0.19 
   9  -6  17    4.77    0.19 
  -9  -6 -17    4.72    0.20 
   9  -6  17    4.61    0.21 
  -9  -6 -15   17.98    0.41 
   9  -6  15   18.49    0.44 
   9  -6  15   18.01    0.38 
  -9  -6 -13    0.99    0.10 
   9  -6  13    0.71    0.10 
   9  -6  13    0.90    0.09 
   9  -6  11    4.45    0.20 
  -9  -6 -11    4.42    0.18 
   9  -6  11    4.63    0.15 
   9  -6   9    3.52    0.18 
  -9  -6  -9    3.44    0.15 
   9  -6   9    3.51    0.14 
  -9  -6  -7    1.59    0.10 
   9  -6   7    1.37    0.12 
  -9   6  -7    1.56    0.08 
  -9  -6  -5    0.06    0.04 
   9  -6   5    0.10    0.06 
  -9   6  -5    0.06    0.03 
   9  -6   3    0.35    0.07 
  -9  -6  -3    0.30    0.06 
  -9   6  -3    0.35    0.05 
   9  -6   1    1.38    0.12 
  -9  -6  -1    1.46    0.09 
  -9   6  -1    1.52    0.09 
  -9  -6   1    6.27    0.18 
   9  -6  -1    6.18    0.21 
  -9   6   1    6.42    0.19 
  -9  -6   3    0.34    0.05 
   9  -6  -3    0.24    0.07 
  -9   6   3    0.42    0.06 
  -9  -6   5   18.23    0.38 
  -9  -6   5   18.53    0.34 
   9  -6  -5   18.89    0.39 
  -9   6   5   17.65    0.36 
   9  -6  -7    9.13    0.25 
  -9  -6   7    9.47    0.26 
  -9  -6   7    9.74    0.21 
  -9   6   7    9.47    0.25 
  -9  -6   9    4.83    0.14 
   9  -6  -9    4.81    0.18 
  -9  -6   9    4.65    0.18 
  -9   6   9    4.94    0.18 
   9  -6 -11   35.71    0.60 
  -9  -6  11   36.32    0.64 
  -9   6  11   35.30    0.62 
  -9  -6  13    0.94    0.11 
  -9   6  13    0.73    0.09 
  -9  -6  15   37.18    0.67 
  -9   6  15   37.76    0.66 
  -9  -6  17   22.75    0.49 
  -9   6  17   21.82    0.46 
  -9  -6  19   11.20    0.33 
  -9   6  19   11.06    0.31 
  -9  -6  21   50.03    0.88 
  -9   6  21   49.45    0.85 
  -9  -6  23    3.81    0.22 
  -9   6  23    3.97    0.19 
  -9  -6  25   29.90    0.64 
  -9   6  25   28.59    0.59 
  -9  -6  27   34.53    0.72 
  -9   6  27   33.99    0.68 
  -9  -6  29    1.53    0.17 
  -9   6  29    1.56    0.15 
  -9  -6  31   34.89    0.77 
  -9   6  31   35.93    0.71 
  -9   6  33    8.74    0.32 
  -9  -7 -28    2.31    0.19 
   9  -7  28    2.66    0.22 
  -9  -7 -26    4.40    0.23 
   9  -7  26    4.30    0.25 
   9  -7  24    5.36    0.27 
  -9  -7 -24    5.59    0.25 
  -9  -7 -22    0.58    0.11 
   9  -7  22    0.70    0.12 
   9  -7  20    0.05    0.08 
  -9  -7 -20    0.12    0.07 
   9  -7  18   21.14    0.51 
  -9  -7 -18   21.99    0.49 
   9  -7  16    0.46    0.09 
  -9  -7 -16    0.40    0.09 
  -9  -7 -14    5.53    0.22 
   9  -7  14    5.69    0.25 
  -9  -7 -12   35.98    0.66 
   9  -7  12   38.14    0.71 
  -9  -7 -10    5.89    0.22 
   9  -7  10    5.99    0.24 
   9  -7   8    9.69    0.30 
  -9  -7  -8    9.54    0.27 
   9  -7   6   36.12    0.67 
  -9  -7  -6   34.95    0.62 
  -9   7  -6   36.41    0.58 
  -9  -7  -4   28.58    0.52 
   9  -7   4   27.25    0.55 
  -9   7  -4   28.71    0.48 
  -9  -7  -2   20.47    0.41 
   9  -7   2   20.24    0.44 
  -9   7  -2   20.79    0.39 
   9  -7   0   12.94    0.33 
  -9  -7   0   12.31    0.28 
  -9   7   0   11.97    0.28 
  -9  -7   2   58.25    0.86 
   9  -7  -2   57.30    0.92 
  -9   7   2   57.92    0.88 
  -9  -7   4   12.10    0.26 
   9  -7  -4   11.26    0.30 
  -9   7   4   12.22    0.29 
   9  -7  -6    0.55    0.08 
  -9  -7   6    0.48    0.06 
  -9  -7   6    0.49    0.08 
  -9   7   6    0.34    0.07 
  -9  -7   8   38.30    0.68 
  -9  -7   8   39.68    0.60 
   9  -7  -8   38.42    0.66 
  -9   7   8   38.99    0.67 
  -9  -7  10   -0.02    0.06 
   9  -7 -10    0.06    0.06 
  -9   7  10    0.00    0.05 
  -9  -7  12    1.79    0.14 
   9  -7 -12    1.93    0.13 
  -9   7  12    1.92    0.14 
  -9  -7  14   25.59    0.53 
  -9   7  14   25.27    0.52 
  -9  -7  16    2.05    0.15 
  -9   7  16    2.28    0.15 
  -9  -7  18    6.41    0.26 
  -9   7  18    6.82    0.25 
  -9  -7  20    8.65    0.30 
  -9   7  20    8.33    0.29 
  -9  -7  22    6.18    0.27 
  -9   7  22    6.01    0.25 
  -9  -7  24    0.04    0.09 
  -9   7  24    0.18    0.07 
  -9  -7  26    1.92    0.19 
  -9   7  26    2.12    0.18 
  -9  -7  28    3.45    0.23 
  -9   7  28    3.60    0.21 
  -9   7  30    0.38    0.10 
   9  -8  27    6.64    0.37 
   9  -8  25    6.07    0.30 
  -9  -8 -25    6.45    0.28 
   9  -8  23    0.26    0.10 
  -9  -8 -23    0.41    0.10 
   9  -8  21    6.70    0.30 
  -9  -8 -21    6.90    0.28 
   9  -8  19    0.24    0.09 
  -9  -8 -19    0.31    0.09 
   9  -8  17    1.88    0.18 
  -9  -8 -17    1.95    0.16 
   9  -8  15    2.17    0.18 
  -9  -8 -15    2.27    0.16 
   9  -8  13    0.09    0.07 
  -9  -8 -13    0.09    0.06 
  -9  -8 -11    0.93    0.10 
   9  -8  11    0.70    0.11 
   9  -8   9    0.15    0.08 
  -9  -8  -9    0.28    0.07 
   9  -8   7    1.79    0.16 
  -9  -8  -7    1.73    0.13 
  -9  -8  -5    1.60    0.12 
   9  -8   5    1.49    0.14 
  -9  -8  -3    4.32    0.18 
   9  -8   3    4.34    0.20 
  -9   8  -3    4.60    0.16 
   9  -8   1    0.11    0.06 
  -9  -8  -1    0.11    0.05 
  -9   8  -1    0.32    0.06 
   9  -8  -1    2.70    0.17 
  -9  -8   1    2.93    0.14 
  -9   8   1    3.01    0.14 
   9  -8  -3   -0.06    0.06 
  -9  -8   3    0.05    0.04 
  -9   8   3    0.04    0.05 
   9  -8  -5    4.82    0.20 
  -9  -8   5    4.64    0.20 
  -9  -8   5    4.68    0.16 
  -9   8   5    4.94    0.19 
   9  -8  -7    3.80    0.18 
  -9  -8   7    3.78    0.18 
  -9   8   7    3.97    0.18 
   9  -8  -9    1.87    0.15 
  -9  -8   9    2.13    0.15 
  -9   8   9    2.03    0.13 
   9  -8 -11   13.63    0.34 
  -9  -8  11   13.71    0.36 
  -9   8  11   13.95    0.36 
  -9  -8  13    0.55    0.10 
  -9   8  13    0.41    0.08 
  -9  -8  15   14.90    0.39 
  -9   8  15   14.48    0.38 
  -9  -8  17    5.50    0.24 
  -9   8  17    5.20    0.23 
  -9  -8  19    5.60    0.26 
  -9   8  19    5.46    0.24 
  -9  -8  21   18.94    0.49 
  -9   8  21   18.27    0.46 
  -9  -8  23    2.52    0.20 
  -9   8  23    2.84    0.19 
  -9  -8  25    8.21    0.33 
  -9   8  25    7.95    0.31 
  -9  -8  27    8.84    0.35 
  -9   8  27    9.12    0.34 
  -9  -9 -22    4.54    0.27 
   9  -9  22    4.63    0.27 
   9  -9  20    0.32    0.11 
  -9  -9 -20    0.42    0.10 
  -9  -9 -18   33.05    0.69 
   9  -9  18   33.99    0.74 
   9  -9  16    3.23    0.23 
  -9  -9 -16    3.30    0.20 
   9  -9  14   12.84    0.41 
  -9  -9 -14   12.99    0.37 
   9  -9  12   33.87    0.71 
  -9  -9 -12   33.51    0.66 
   9  -9  10    1.95    0.18 
  -9  -9 -10    2.03    0.15 
  -9  -9  -8   28.73    0.57 
   9  -9   8   28.36    0.62 
   9  -9   6   25.28    0.57 
  -9  -9  -6   25.12    0.52 
  -9  -9  -4   20.54    0.45 
   9  -9   4   20.93    0.50 
  -9  -9  -2   34.66    0.63 
   9  -9   2   35.12    0.69 
  -9  -9   0    1.91    0.13 
   9  -9   0    2.09    0.17 
  -9   9   0    1.91    0.13 
   9  -9  -2   54.26    0.92 
  -9  -9   2   54.08    0.91 
  -9  -9   2   53.79    0.85 
  -9   9   2   54.99    0.88 
  -9  -9   4   22.45    0.49 
   9  -9  -4   22.37    0.49 
  -9   9   4   22.56    0.47 
  -9  -9   6    2.18    0.16 
   9  -9  -6    2.18    0.16 
  -9   9   6    2.43    0.16 
   9  -9  -8   42.91    0.76 
  -9  -9   8   43.24    0.78 
  -9   9   8   44.49    0.78 
  -9  -9  10    3.17    0.18 
  -9   9  10    2.99    0.18 
  -9  -9  12    7.88    0.28 
  -9   9  12    7.48    0.27 
  -9  -9  14   23.19    0.53 
  -9   9  14   24.05    0.53 
  -9  -9  16    0.33    0.10 
  -9   9  16    0.40    0.09 
  -9  -9  18    9.23    0.33 
  -9   9  18    8.94    0.32 
  -9  -9  20    7.45    0.31 
  -9   9  20    7.51    0.30 
  -9  -9  22    1.96    0.19 
  -9   9  22    2.02    0.16 
  -9  -9  24    0.85    0.15 
  -9 -10 -17    1.12    0.14 
   9 -10  17    0.80    0.14 
   9 -10  15   -0.13    0.09 
  -9 -10 -15   -0.09    0.07 
   9 -10  13    0.70    0.13 
  -9 -10 -13    0.61    0.11 
  -9 -10 -11    0.71    0.12 
   9 -10  11    0.74    0.13 
   9 -10   9    0.53    0.12 
  -9 -10  -9    0.57    0.10 
  -9 -10  -7    0.74    0.11 
   9 -10   7    0.68    0.13 
  -9 -10  -5   -0.06    0.06 
   9 -10   5    0.04    0.07 
   9 -10   3    1.00    0.13 
  -9 -10  -3    1.13    0.12 
   9 -10   1    0.00    0.08 
  -9 -10  -1   -0.05    0.06 
   9 -10  -1    0.44    0.10 
  -9 -10   1    0.36    0.08 
   9 -10  -3   -0.06    0.07 
  -9 -10   3    0.12    0.07 
  -9  10   3    0.04    0.06 
   9 -10  -5    0.17    0.08 
  -9 -10   5    0.20    0.08 
  -9  10   5    0.16    0.07 
   9 -10  -7    1.19    0.13 
  -9 -10   7    1.30    0.13 
  -9  10   7    1.63    0.14 
  -9 -10   9    0.29    0.08 
  -9  10   9    0.33    0.09 
  -9 -10  11    0.58    0.10 
  -9  10  11    0.42    0.09 
  -9 -10  13    0.80    0.12 
  -9  10  13    0.69    0.12 
  -9 -10  15    0.11    0.09 
  -9  10  15   -0.01    0.07 
  -9 -10  17   -0.03    0.08 
  -9  10  17    0.02    0.07 
  -9 -10  19    0.05    0.09 
  -9  10  19    0.00    0.07 
  -9 -10  21    0.17    0.11 
  -9 -11 -12   18.45    0.48 
  -9 -11 -10    2.06    0.18 
   9 -11  10    2.33    0.22 
  -9 -11  -8   22.36    0.53 
   9 -11   8   23.79    0.60 
   9 -11   6   14.70    0.45 
  -9 -11  -6   14.16    0.39 
  -9 -11  -4   10.47    0.33 
   9 -11   4   10.95    0.38 
  -9 -11  -2   21.02    0.50 
   9 -11   2   22.02    0.55 
   9 -11   0    0.20    0.09 
  -9 -11   0    0.01    0.08 
   9 -11  -2   31.59    0.67 
  -9 -11   2   30.47    0.64 
   9 -11  -4   12.30    0.38 
  -9 -11   4   12.20    0.37 
  -9 -11   6    2.32    0.19 
  -9  11   6    2.79    0.18 
  -9 -11   8   24.53    0.57 
  -9  11   8   25.05    0.56 
  -9 -11  10    1.05    0.14 
  -9  11  10    1.11    0.14 
  -9 -11  12    5.49    0.26 
  -9  11  12    5.27    0.25 
  -9 -11  14    9.37    0.35 
  -9  11  14    9.38    0.34 
  -9 -11  16    0.89    0.14 
  -9 -12  -7    0.51    0.12 
   9 -12   3   -0.07    0.09 
   9 -12   1   -0.01    0.10 
   9 -12  -1   -0.01    0.10 
  -9 -12   3    0.53    0.12 
  -9 -12   5    1.63    0.17 
  -9 -12   7    0.07    0.09 
  -9 -12   9    2.86    0.21 
  -9  12   9    2.64    0.22 
  10   0  34   43.26    0.87 
  10   0  32    3.83    0.23 
  10   0  30    4.63    0.24 
  10   0  28   87.07    1.38 
  10   0  26    0.83    0.12 
  10   0  24   24.37    0.52 
 -10   0 -22   75.83    1.11 
  10   0  22   78.08    1.19 
 -10   0 -20   54.69    0.82 
  10   0  20   54.14    0.88 
  10   0  18   40.71    0.63 
 -10   0 -18   41.31    0.64 
  10   0  18   40.76    0.69 
  10   0  16   30.46    0.49 
  10   0  16   29.42    0.53 
 -10   0 -16   29.94    0.50 
 -10   0 -14  171.79    2.28 
  10   0  14  175.77    2.32 
  10   0  14  176.50    2.28 
  10   0  12   34.51    0.56 
 -10   0 -12   35.03    0.54 
  10   0  12   34.69    0.54 
 -10   0 -10   19.48    0.35 
  10   0  10   20.63    0.36 
  10   0  10   19.62    0.36 
  10   0   8  209.04    2.94 
 -10   0  -8  213.76    2.80 
 -10   0  -6    8.05    0.18 
 -10   0  -4   12.26    0.24 
 -10   0  -2  249.22    3.38 
 -10   0   0   26.30    0.42 
 -10   0   2    5.61    0.14 
 -10   0   4   99.83    1.33 
 -10   0   6   17.94    0.31 
 -10   0   6   17.59    0.29 
 -10   0   8   32.57    0.50 
 -10   0   8   32.59    0.49 
 -10   0  10    7.45    0.17 
 -10   0  10    7.29    0.17 
 -10   0  12   17.68    0.32 
 -10   0  12   17.80    0.32 
 -10   0  14   49.61    0.74 
 -10   0  14   49.66    0.72 
 -10   0  16   24.21    0.41 
 -10   0  16   24.56    0.44 
 -10   0  18    4.92    0.17 
 -10   0  18    4.74    0.15 
 -10   0  20   25.90    0.49 
 -10   0  20   26.37    0.44 
 -10   0  22   53.89    0.80 
 -10   0  22   53.13    0.86 
 -10   0  24   10.52    0.25 
 -10   0  24   10.37    0.30 
 -10   0  26    6.50    0.24 
 -10   0  26    6.65    0.25 
 -10   0  28   55.65    0.95 
 -10   0  30    2.33    0.18 
 -10   0  32    3.94    0.22 
 -10   0  34   56.04    1.02 
 -10   0  36    1.72    0.19 
  10  -1  33    0.11    0.09 
  10   1  33    0.05    0.08 
  10  -1  31    0.02    0.08 
  10   1  31    0.02    0.07 
  10  -1  29    0.03    0.08 
  10   1  29    0.04    0.07 
  10  -1  27    0.15    0.08 
  10   1  27    0.08    0.07 
  10  -1  25    0.53    0.10 
 -10  -1 -25    0.51    0.08 
  10   1  25    0.47    0.10 
  10  -1  23    0.29    0.08 
 -10  -1 -23    0.20    0.06 
  10   1  23    0.26    0.07 
 -10  -1 -21   -0.08    0.04 
  10  -1  21    0.01    0.05 
 -10   1 -21    0.05    0.06 
  10   1  21    0.04    0.06 
 -10  -1 -19    0.06    0.04 
  10  -1  19    0.04    0.05 
  10  -1  19    0.00    0.05 
  10   1  19    0.03    0.06 
 -10   1 -19    0.19    0.05 
  10  -1  17    1.52    0.11 
  10  -1  17    1.59    0.11 
 -10  -1 -17    1.81    0.11 
 -10   1 -17    1.38    0.09 
  10   1  17    1.62    0.12 
  10  -1  15    0.26    0.06 
  10  -1  15    0.18    0.05 
 -10  -1 -15    0.13    0.05 
  10   1  15    0.26    0.06 
 -10   1 -15    0.19    0.04 
  10  -1  13    0.69    0.07 
  10  -1  13    0.40    0.06 
 -10  -1 -13    0.54    0.06 
  10   1  13    0.52    0.07 
 -10   1 -13    0.55    0.06 
 -10  -1 -11   10.95    0.24 
  10  -1  11   11.63    0.25 
  10  -1  11   11.07    0.24 
 -10   1 -11   11.29    0.23 
  10   1  11   11.37    0.26 
 -10  -1  -9    1.65    0.09 
  10  -1   9    1.51    0.08 
  10  -1   9    1.50    0.09 
 -10   1  -9    1.60    0.08 
  10  -1   7    4.04    0.14 
  10  -1   7    4.11    0.12 
 -10   1  -7    4.06    0.12 
 -10  -1  -5   16.21    0.30 
  10  -1   5   16.67    0.31 
 -10   1  -5   16.29    0.29 
  10  -1   3    0.49    0.06 
 -10   1  -3    0.64    0.06 
 -10  -1  -1   33.39    0.50 
 -10   1  -1   32.95    0.50 
 -10  -1   1   39.51    0.57 
 -10   1   1   38.37    0.57 
 -10  -1   3    1.31    0.07 
 -10   1   3    1.17    0.07 
 -10  -1   5   20.84    0.35 
 -10   1   5   21.32    0.32 
 -10   1   5   21.03    0.35 
 -10  -1   7   17.87    0.31 
 -10  -1   7   17.89    0.32 
 -10   1   7   18.58    0.29 
 -10   1   7   18.91    0.33 
 -10  -1   9    2.11    0.09 
 -10  -1   9    2.03    0.09 
 -10   1   9    2.24    0.09 
 -10   1   9    2.05    0.08 
 -10  -1  11    8.17    0.18 
 -10  -1  11    8.14    0.19 
 -10   1  11    8.24    0.18 
 -10   1  11    8.40    0.19 
 -10  -1  13    0.14    0.04 
 -10  -1  13    0.19    0.05 
 -10   1  13    0.13    0.04 
 -10   1  13    0.14    0.04 
 -10  -1  15   13.13    0.25 
 -10  -1  15   13.70    0.29 
 -10   1  15   13.34    0.28 
 -10   1  15   13.01    0.27 
 -10  -1  17    4.39    0.13 
 -10  -1  17    4.28    0.16 
 -10   1  17    4.57    0.16 
 -10   1  17    4.44    0.15 
 -10  -1  19    2.27    0.13 
 -10  -1  19    2.23    0.10 
 -10   1  19    2.15    0.11 
 -10   1  19    2.37    0.13 
 -10  -1  21    3.70    0.13 
 -10  -1  21    3.77    0.17 
 -10   1  21    3.79    0.17 
 -10   1  21    4.00    0.15 
 -10  -1  23    0.14    0.07 
 -10  -1  23    0.19    0.05 
 -10   1  23    0.22    0.07 
 -10   1  23    0.32    0.06 
 -10  -1  25    3.47    0.18 
 -10   1  25    3.71    0.15 
 -10   1  25    3.85    0.18 
 -10  -1  27    1.82    0.15 
 -10   1  27    1.89    0.12 
 -10   1  27    1.73    0.14 
 -10  -1  29    0.51    0.11 
 -10   1  29    0.42    0.09 
 -10  -1  31    2.94    0.20 
 -10   1  31    2.75    0.19 
 -10  -1  33    0.57    0.12 
 -10   1  33    0.53    0.12 
 -10  -1  35    0.03    0.09 
 -10   1  35    0.18    0.09 
 -10  -1  37    0.32    0.12 
 -10   1  37    0.57    0.12 
  10  -2  34   33.55    0.74 
  10   2  34   33.86    0.82 
  10  -2  32    1.20    0.15 
  10   2  32    0.98    0.14 
  10  -2  30    3.05    0.21 
  10   2  30    3.08    0.21 
  10  -2  28   60.13    1.03 
  10   2  28   59.61    1.04 
 -10  -2 -26    2.86    0.15 
  10  -2  26    3.05    0.19 
  10   2  26    3.00    0.19 
  10  -2  24   24.01    0.52 
 -10  -2 -24   23.88    0.47 
  10   2  24   23.92    0.52 
 -10  -2 -22   57.11    0.90 
  10  -2  22   57.58    0.94 
  10  -2  22   57.65    0.89 
  10   2  22   57.22    0.95 
  10  -2  20   31.50    0.56 
 -10  -2 -20   30.99    0.56 
  10  -2  20   32.00    0.59 
  10   2  20   32.48    0.60 
  10  -2  18   25.08    0.49 
  10  -2  18   25.95    0.47 
 -10  -2 -18   25.72    0.47 
  10   2  18   25.59    0.50 
 -10   2 -18   25.93    0.43 
  10  -2  16   14.62    0.33 
 -10  -2 -16   14.77    0.32 
  10  -2  16   14.97    0.32 
 -10   2 -16   14.78    0.28 
  10   2  16   14.56    0.34 
  10  -2  14   68.54    1.01 
 -10  -2 -14   69.06    1.00 
  10  -2  14   69.67    1.00 
  10   2  14   67.67    1.02 
 -10   2 -14   69.58    0.96 
  10  -2  12   13.77    0.29 
 -10  -2 -12   12.54    0.27 
  10  -2  12   13.18    0.27 
 -10   2 -12   12.45    0.25 
 -10  -2 -10    7.52    0.19 
  10  -2  10    7.60    0.21 
  10  -2  10    7.45    0.18 
 -10   2 -10    7.49    0.17 
  10  -2   8   73.29    1.00 
  10  -2   8   75.07    1.05 
 -10  -2  -8   71.43    1.03 
 -10   2  -8   75.21    1.01 
  10  -2   6    7.49    0.20 
 -10  -2  -6    7.20    0.18 
  10  -2   6    7.82    0.16 
 -10   2  -6    7.11    0.17 
 -10  -2  -4    6.60    0.17 
  10  -2   4    6.45    0.13 
  10  -2   4    6.43    0.18 
 -10   2  -4    6.68    0.16 
 -10  -2  -2   35.39    0.54 
  10  -2   2   35.27    0.56 
 -10   2  -2   35.04    0.53 
 -10   2   0   33.01    0.50 
 -10  -2   2    2.05    0.09 
  10  -2  -2    2.12    0.10 
 -10   2   2    2.11    0.09 
 -10  -2   4   16.71    0.29 
 -10   2   4   16.84    0.30 
 -10   2   4   16.90    0.24 
 -10  -2   6    9.40    0.21 
 -10  -2   6    9.37    0.19 
 -10   2   6    9.25    0.21 
 -10   2   6    9.28    0.16 
 -10  -2   8    7.24    0.18 
 -10  -2   8    6.87    0.16 
 -10   2   8    7.50    0.18 
 -10   2   8    7.35    0.14 
 -10  -2  10    9.23    0.19 
 -10  -2  10    9.35    0.22 
 -10   2  10    9.20    0.21 
 -10   2  10    9.46    0.18 
 -10  -2  12    0.29    0.05 
 -10  -2  12    0.26    0.04 
 -10   2  12    0.47    0.06 
 -10  -2  14   28.75    0.49 
 -10  -2  14   28.21    0.44 
 -10   2  14   27.61    0.46 
 -10   2  14   28.51    0.48 
 -10  -2  16   19.52    0.33 
 -10  -2  16   18.25    0.38 
 -10   2  16   19.73    0.36 
 -10   2  16   19.14    0.36 
 -10  -2  18    9.88    0.20 
 -10  -2  18    9.58    0.26 
 -10   2  18    9.66    0.24 
 -10   2  18    9.69    0.24 
 -10  -2  20    6.24    0.22 
 -10  -2  20    6.28    0.16 
 -10   2  20    6.31    0.19 
 -10   2  20    6.44    0.20 
 -10  -2  22   57.30    0.92 
 -10   2  22   55.92    0.88 
 -10   2  22   56.04    0.87 
 -10  -2  24    9.63    0.29 
 -10   2  24    9.59    0.26 
 -10   2  24   10.04    0.28 
 -10  -2  26    0.85    0.11 
 -10   2  26    1.00    0.11 
 -10   2  26    1.10    0.10 
 -10  -2  28   53.68    0.94 
 -10   2  28   53.75    0.86 
 -10   2  28   53.02    0.90 
 -10  -2  30    1.15    0.14 
 -10   2  30    1.30    0.14 
 -10   2  30    1.14    0.11 
 -10  -2  32    2.29    0.20 
 -10   2  32    2.27    0.18 
 -10  -2  34   37.64    0.79 
 -10   2  34   37.51    0.75 
 -10  -2  36    3.30    0.24 
  10  -3  33    0.54    0.12 
  10   3  33    0.49    0.11 
  10  -3  31    0.06    0.09 
  10   3  31   -0.02    0.08 
  10  -3  29    0.32    0.09 
 -10  -3 -29    0.30    0.08 
  10   3  29    0.14    0.09 
 -10  -3 -27    0.32    0.08 
  10  -3  27    0.27    0.09 
  10   3  27    0.22    0.09 
  10  -3  25    2.31    0.17 
 -10  -3 -25    2.41    0.15 
  10   3  25    2.48    0.17 
  10  -3  23    0.42    0.08 
 -10  -3 -23    0.54    0.08 
  10  -3  23    0.46    0.09 
  10   3  23    0.45    0.09 
  10  -3  21   13.72    0.35 
 -10  -3 -21   13.06    0.32 
  10  -3  21   13.17    0.33 
  10   3  21   13.34    0.36 
  10  -3  19    2.64    0.15 
  10  -3  19    2.53    0.15 
 -10  -3 -19    2.62    0.14 
  10   3  19    2.70    0.15 
  10  -3  17   11.78    0.30 
 -10  -3 -17   11.76    0.29 
  10  -3  17   11.41    0.29 
  10  -3  15   51.77    0.79 
  10  -3  15   51.70    0.81 
 -10  -3 -15   49.64    0.79 
 -10   3 -15   50.45    0.73 
  10  -3  13    0.80    0.08 
  10  -3  13    1.20    0.09 
 -10   3 -13    1.11    0.07 
  10  -3  11   67.35    0.99 
  10  -3  11   66.03    0.94 
 -10   3 -11   64.59    0.91 
 -10  -3  -9   86.71    1.21 
  10  -3   9   87.68    1.23 
  10  -3   9   85.61    1.16 
 -10   3  -9   83.54    1.15 
 -10  -3  -7   11.85    0.26 
  10  -3   7   11.82    0.28 
  10  -3   7   12.29    0.22 
 -10   3  -7   11.99    0.23 
  10  -3   5  129.13    1.71 
 -10  -3  -5  133.65    1.75 
  10  -3   5  130.72    1.77 
 -10   3  -5  130.67    1.72 
  10  -3   3   12.90    0.20 
 -10   3  -3   12.97    0.25 
 -10  -3  -1  111.88    1.49 
  10  -3   1  111.38    1.52 
 -10   3  -1  111.17    1.48 
  10  -3  -1  132.06    1.77 
 -10  -3   1  131.82    1.73 
 -10   3   1  131.62    1.74 
 -10  -3   3   17.20    0.30 
  10  -3  -3   16.97    0.33 
 -10   3   3   17.00    0.31 
 -10  -3   5  146.50    1.91 
  10  -3  -5  144.78    1.95 
 -10   3   5  149.20    1.94 
 -10  -3   7   33.01    0.50 
 -10  -3   7   33.52    0.54 
 -10   3   7   33.07    0.44 
 -10   3   7   33.85    0.53 
 -10  -3   9   99.55    1.34 
 -10  -3   9   96.86    1.29 
 -10   3   9   94.11    1.33 
 -10   3   9   96.35    1.24 
 -10  -3  11  102.86    1.35 
 -10  -3  11  101.70    1.41 
 -10   3  11   99.76    1.33 
 -10   3  11  102.99    1.40 
 -10  -3  13    3.42    0.11 
 -10  -3  13    3.51    0.14 
 -10   3  13    3.49    0.13 
 -10   3  13    3.58    0.11 
 -10  -3  15  148.82    2.05 
 -10  -3  15  156.71    1.96 
 -10   3  15  150.36    1.98 
 -10   3  15  150.55    2.03 
 -10  -3  17   23.05    0.46 
 -10  -3  17   24.05    0.38 
 -10   3  17   23.49    0.41 
 -10   3  17   23.71    0.44 
 -10  -3  19   21.34    0.45 
 -10   3  19   21.78    0.42 
 -10   3  19   21.60    0.40 
 -10  -3  21   63.10    1.01 
 -10   3  21   63.42    0.97 
 -10   3  21   63.11    0.95 
 -10  -3  23    0.84    0.12 
 -10   3  23    0.87    0.09 
 -10   3  23    1.04    0.10 
 -10  -3  25   22.96    0.51 
 -10   3  25   23.32    0.47 
 -10   3  25   23.31    0.47 
 -10  -3  27   17.42    0.45 
 -10   3  27   17.39    0.40 
 -10   3  27   17.82    0.42 
 -10  -3  29    2.33    0.19 
 -10   3  29    2.25    0.15 
 -10  -3  31    9.91    0.35 
 -10   3  31    9.37    0.29 
 -10  -3  33    1.32    0.17 
 -10  -3  35    1.63    0.19 
  10  -4  32    0.04    0.09 
  10   4  32    0.13    0.08 
  10  -4  30    0.54    0.12 
 -10  -4 -30    0.49    0.10 
  10   4  30    0.57    0.11 
 -10  -4 -28    9.53    0.30 
  10  -4  28    9.61    0.33 
  10   4  28    8.81    0.33 
  10  -4  26    4.81    0.23 
 -10  -4 -26    4.32    0.20 
  10  -4  24    0.42    0.09 
 -10  -4 -24    0.50    0.09 
  10  -4  24    0.47    0.09 
  10  -4  22    9.54    0.29 
 -10  -4 -22    9.41    0.28 
  10  -4  22    9.67    0.29 
  10  -4  20   18.21    0.42 
 -10  -4 -20   18.49    0.41 
  10  -4  20   17.85    0.41 
  10  -4  18    0.16    0.07 
  10  -4  18    0.20    0.07 
 -10  -4 -18    0.12    0.06 
  10  -4  16    0.11    0.06 
 -10  -4 -16    0.11    0.05 
  10  -4  16    0.02    0.05 
  10  -4  14   27.81    0.48 
  10  -4  14   26.92    0.52 
 -10  -4 -14   26.62    0.50 
  10  -4  12    0.47    0.06 
 -10  -4 -12    0.66    0.08 
  10  -4  12    0.60    0.08 
 -10   4 -12    0.50    0.05 
 -10  -4 -10    1.33    0.10 
  10  -4  10    1.12    0.08 
  10  -4  10    1.10    0.11 
 -10   4 -10    1.31    0.07 
 -10  -4  -8   48.44    0.75 
  10  -4   8   49.27    0.69 
  10  -4   8   47.99    0.78 
 -10   4  -8   48.97    0.70 
  10  -4   6    3.72    0.16 
  10  -4   6    3.69    0.10 
 -10   4  -6    3.55    0.12 
  10  -4   4    0.36    0.06 
  10  -4   4    0.48    0.04 
 -10  -4  -4    0.45    0.06 
 -10   4  -4    0.37    0.05 
 -10  -4  -2   19.78    0.36 
  10  -4   2   20.65    0.40 
 -10   4  -2   20.30    0.36 
 -10  -4   0   17.80    0.33 
  10  -4   0   18.08    0.36 
 -10   4   0   18.44    0.33 
  10  -4  -2   26.63    0.47 
 -10  -4   2   25.18    0.43 
 -10   4   2   26.52    0.44 
 -10  -4   4   10.57    0.22 
  10  -4  -4   10.65    0.26 
 -10   4   4   11.31    0.25 
 -10  -4   6    7.91    0.18 
  10  -4  -6    8.15    0.22 
 -10   4   6    8.00    0.21 
 -10  -4   8   16.01    0.33 
  10  -4  -8   16.59    0.34 
 -10  -4   8   15.92    0.29 
 -10   4   8   16.12    0.32 
 -10  -4  10    8.44    0.23 
 -10  -4  10    8.80    0.19 
 -10   4  10    8.95    0.23 
 -10  -4  12    2.80    0.10 
 -10  -4  12    2.57    0.13 
 -10   4  12    2.48    0.12 
 -10  -4  14   36.61    0.63 
 -10  -4  14   37.34    0.54 
 -10   4  14   35.94    0.61 
 -10  -4  16    1.70    0.13 
 -10   4  16    1.91    0.12 
 -10  -4  18    0.86    0.10 
 -10   4  18    0.92    0.09 
 -10  -4  20   10.23    0.30 
 -10   4  20   10.53    0.28 
 -10  -4  22   12.54    0.35 
 -10   4  22   12.19    0.31 
 -10  -4  24    0.47    0.09 
 -10   4  24    0.72    0.09 
 -10  -4  26    3.14    0.20 
 -10   4  26    3.15    0.17 
 -10  -4  28   10.63    0.35 
 -10   4  28   10.54    0.31 
 -10  -4  30    0.46    0.12 
 -10   4  30    0.44    0.09 
 -10  -4  32    0.94    0.14 
 -10   4  32    0.95    0.12 
 -10  -4  34    8.19    0.34 
 -10   4  34    7.99    0.44 
 -10  -5 -33    0.04    0.08 
  10  -5  33    0.09    0.14 
 -10  -5 -31    0.12    0.08 
  10  -5  31    0.25    0.11 
 -10  -5 -29   -0.02    0.07 
  10  -5  29    0.14    0.09 
 -10  -5 -27    0.31    0.09 
  10  -5  27    0.47    0.11 
  10  -5  25    1.49    0.15 
 -10  -5 -25    1.28    0.13 
  10  -5  25    1.67    0.15 
 -10  -5 -23    0.29    0.08 
  10  -5  23    0.40    0.09 
  10  -5  23    0.33    0.09 
 -10  -5 -21    9.26    0.29 
  10  -5  21    9.13    0.30 
  10  -5  21    9.44    0.29 
  10  -5  19    2.13    0.16 
  10  -5  19    2.22    0.14 
 -10  -5 -19    2.15    0.15 
  10  -5  17    7.93    0.24 
 -10  -5 -17    8.25    0.26 
  10  -5  17    8.42    0.27 
 -10  -5 -15   19.35    0.42 
  10  -5  15   19.78    0.39 
  10  -5  15   18.73    0.43 
  10  -5  13    0.50    0.08 
  10  -5  13    0.80    0.08 
 -10  -5 -13    0.50    0.07 
  10  -5  11   29.10    0.56 
 -10  -5 -11   29.51    0.54 
  10  -5  11   29.83    0.49 
  10  -5   9   17.39    0.31 
 -10  -5  -9   17.18    0.37 
  10  -5   9   17.70    0.39 
 -10   5  -9   17.62    0.32 
  10  -5   7   40.35    0.69 
  10  -5   7   40.87    0.59 
 -10  -5  -7   39.96    0.66 
 -10   5  -7   40.91    0.61 
  10  -5   5   99.93    1.43 
 -10  -5  -5   97.96    1.39 
  10  -5   5  100.62    1.29 
 -10   5  -5   99.89    1.35 
 -10  -5  -3    1.66    0.10 
 -10   5  -3    1.84    0.10 
  10  -5   1   94.77    1.38 
 -10  -5  -1   98.39    1.34 
 -10   5  -1   97.81    1.33 
 -10  -5   1   82.81    1.15 
  10  -5  -1   82.55    1.20 
 -10   5   1   82.62    1.16 
 -10  -5   3   14.69    0.29 
  10  -5  -3   15.31    0.33 
 -10   5   3   14.66    0.31 
  10  -5  -5  132.52    1.79 
 -10  -5   5  130.79    1.73 
 -10   5   5  128.73    1.77 
  10  -5  -7   31.50    0.54 
 -10  -5   7   31.62    0.49 
 -10  -5   7   31.02    0.55 
 -10   5   7   30.88    0.53 
 -10  -5   9   55.94    0.89 
 -10  -5   9   58.53    0.82 
  10  -5  -9   59.02    0.88 
 -10   5   9   58.14    0.88 
 -10  -5  11  108.61    1.56 
 -10  -5  11  112.07    1.46 
 -10   5  11  111.10    1.55 
 -10  -5  13    1.85    0.08 
 -10  -5  13    1.82    0.12 
 -10   5  13    1.87    0.12 
 -10  -5  15   60.66    0.95 
 -10   5  15   59.48    0.93 
 -10  -5  17   18.13    0.41 
 -10   5  17   18.07    0.39 
 -10  -5  19    9.88    0.30 
 -10   5  19    9.28    0.27 
 -10  -5  21   39.77    0.74 
 -10   5  21   40.48    0.71 
 -10  -5  23    2.14    0.17 
 -10   5  23    2.12    0.15 
 -10  -5  25   19.02    0.47 
 -10   5  25   18.62    0.44 
 -10  -5  27   15.12    0.43 
 -10   5  27   15.76    0.40 
 -10  -5  29    0.77    0.13 
 -10   5  29    0.66    0.10 
 -10  -5  31    9.75    0.37 
 -10   5  31   10.54    0.34 
 -10  -5  33    1.18    0.25 
 -10   5  33    1.15    0.14 
 -10   5  35    2.46    0.19 
 -10  -6 -30    4.34    0.24 
  10  -6  30    4.09    0.25 
  10  -6  28    0.06    0.09 
  10  -6  28    0.11    0.09 
 -10  -6 -28    0.18    0.09 
  10  -6  26    1.23    0.15 
 -10  -6 -26    1.06    0.13 
  10  -6  26    1.46    0.16 
 -10  -6 -24    5.64    0.24 
  10  -6  24    5.79    0.26 
  10  -6  24    5.55    0.25 
  10  -6  22    0.16    0.08 
 -10  -6 -22    0.35    0.09 
  10  -6  22    0.10    0.08 
  10  -6  20    1.10    0.12 
  10  -6  20    0.87    0.12 
 -10  -6 -20    1.07    0.12 
 -10  -6 -18    9.18    0.29 
  10  -6  18    9.62    0.32 
  10  -6  18    9.58    0.27 
 -10  -6 -16    0.14    0.06 
  10  -6  16    0.20    0.08 
  10  -6  16    0.29    0.07 
  10  -6  14    0.65    0.10 
 -10  -6 -14    0.63    0.09 
  10  -6  14    0.69    0.13 
  10  -6  12    5.02    0.22 
 -10  -6 -12    5.14    0.20 
  10  -6  10    7.95    0.26 
 -10  -6 -10    7.54    0.23 
 -10  -6  -8    0.59    0.08 
  10  -6   8    0.54    0.09 
 -10   6  -8    0.64    0.06 
  10  -6   6    7.57    0.25 
 -10  -6  -6    7.61    0.22 
 -10   6  -6    7.82    0.20 
 -10  -6  -4    0.96    0.09 
  10  -6   4    0.66    0.09 
 -10   6  -4    0.81    0.07 
 -10  -6  -2    0.10    0.04 
  10  -6   2    0.07    0.06 
 -10   6  -2    0.07    0.04 
 -10  -6   0    5.94    0.18 
  10  -6   0    5.89    0.21 
 -10   6   0    6.06    0.18 
  10  -6  -2    9.35    0.26 
 -10  -6   2    9.23    0.23 
 -10   6   2    9.08    0.23 
 -10  -6   4    0.23    0.05 
  10  -6  -4    0.38    0.07 
 -10   6   4    0.24    0.05 
  10  -6  -6    6.35    0.21 
 -10  -6   6    6.40    0.21 
 -10  -6   6    6.55    0.17 
 -10   6   6    6.12    0.19 
  10  -6  -8    0.44    0.07 
 -10  -6   8    0.39    0.07 
 -10  -6   8    0.62    0.06 
 -10   6   8    0.53    0.07 
 -10  -6  10    0.36    0.05 
  10  -6 -10    0.39    0.07 
 -10  -6  10    0.37    0.07 
 -10   6  10    0.35    0.07 
 -10  -6  12   10.74    0.29 
 -10   6  12   10.67    0.28 
 -10  -6  14    1.07    0.11 
 -10   6  14    1.17    0.10 
 -10  -6  16    0.21    0.07 
 -10   6  16    0.28    0.07 
 -10  -6  18    5.35    0.23 
 -10   6  18    5.57    0.21 
 -10  -6  20    2.08    0.16 
 -10   6  20    2.47    0.16 
 -10  -6  22    0.54    0.11 
 -10   6  22    0.57    0.09 
 -10  -6  24    5.11    0.25 
 -10   6  24    4.96    0.22 
 -10  -6  26    1.21    0.15 
 -10   6  26    1.40    0.14 
 -10  -6  28    0.08    0.09 
 -10   6  28   -0.02    0.06 
 -10  -6  30    1.65    0.19 
 -10   6  30    1.98    0.17 
 -10   6  32    3.85    0.23 
  10  -7  29    0.35    0.11 
 -10  -7 -27    0.01    0.08 
  10  -7  27   -0.09    0.08 
  10  -7  25    1.37    0.16 
 -10  -7 -25    1.05    0.13 
  10  -7  23    0.06    0.08 
 -10  -7 -23    0.05    0.07 
 -10  -7 -21    7.56    0.28 
  10  -7  21    7.97    0.31 
 -10  -7 -19    7.21    0.27 
  10  -7  19    7.33    0.30 
 -10  -7 -17    4.62    0.21 
  10  -7  17    4.29    0.23 
  10  -7  15   22.18    0.52 
 -10  -7 -15   22.36    0.49 
  10  -7  13    1.45    0.15 
 -10  -7 -13    1.45    0.12 
 -10  -7 -11   22.06    0.47 
  10  -7  11   22.25    0.51 
 -10  -7  -9   28.93    0.55 
  10  -7   9   28.71    0.59 
  10  -7   7   10.45    0.32 
 -10  -7  -7   10.83    0.29 
 -10  -7  -5   62.47    0.97 
  10  -7   5   63.68    1.02 
 -10   7  -5   63.28    0.93 
 -10  -7  -3    6.16    0.21 
  10  -7   3    5.77    0.23 
 -10   7  -3    6.28    0.19 
  10  -7   1   42.51    0.74 
 -10  -7  -1   42.42    0.69 
 -10   7  -1   41.95    0.68 
  10  -7  -1   40.64    0.71 
 -10  -7   1   41.21    0.66 
 -10   7   1   41.56    0.68 
  10  -7  -3    9.46    0.28 
 -10  -7   3    8.96    0.23 
 -10   7   3    9.24    0.25 
 -10  -7   5   70.70    1.09 
  10  -7  -5   71.41    1.09 
 -10  -7   5   70.31    1.02 
 -10   7   5   72.87    1.08 
 -10  -7   7   10.44    0.29 
  10  -7  -7   10.06    0.29 
 -10  -7   7   10.53    0.24 
 -10   7   7    9.55    0.27 
  10  -7  -9   50.96    0.82 
 -10  -7   9   51.11    0.85 
 -10   7   9   49.96    0.83 
 -10  -7  11   56.19    0.92 
  10  -7 -11   55.80    0.89 
 -10   7  11   56.36    0.91 
 -10  -7  13    1.00    0.11 
 -10   7  13    0.75    0.10 
 -10  -7  15   54.17    0.91 
 -10   7  15   52.54    0.89 
 -10  -7  17    8.77    0.29 
 -10   7  17    8.58    0.28 
 -10  -7  19   14.66    0.40 
 -10   7  19   13.74    0.38 
 -10  -7  21   31.00    0.65 
 -10   7  21   30.30    0.62 
 -10  -7  23    0.15    0.09 
 -10   7  23    0.05    0.07 
 -10  -7  25   13.65    0.42 
 -10   7  25   13.21    0.39 
 -10  -7  27    9.00    0.35 
 -10   7  27    8.98    0.32 
 -10  -7  29    1.34    0.17 
 -10   7  29    1.61    0.17 
  10  -8  26    0.53    0.13 
  10  -8  24   19.23    0.53 
 -10  -8 -24   19.60    0.51 
 -10  -8 -22    5.24    0.25 
  10  -8  22    4.79    0.27 
  10  -8  20    0.85    0.13 
 -10  -8 -20    0.86    0.12 
 -10  -8 -18   28.20    0.60 
  10  -8  18   28.45    0.64 
  10  -8  16    0.33    0.10 
 -10  -8 -16    0.39    0.09 
 -10  -8 -14    8.19    0.28 
  10  -8  14    7.77    0.31 
 -10  -8 -12   18.84    0.44 
  10  -8  12   19.32    0.49 
 -10  -8 -10    4.65    0.20 
  10  -8  10    4.85    0.23 
 -10  -8  -8    7.23    0.25 
  10  -8   8    6.50    0.27 
  10  -8   6    9.99    0.32 
 -10  -8  -6    9.83    0.28 
  10  -8   4    1.74    0.15 
 -10  -8  -4    1.75    0.13 
 -10  -8  -2    0.54    0.08 
  10  -8   2    0.41    0.08 
 -10   8  -2    0.53    0.07 
  10  -8   0    1.63    0.14 
 -10  -8   0    1.54    0.11 
 -10   8   0    1.62    0.11 
 -10  -8   2    6.63    0.20 
  10  -8  -2    5.68    0.23 
 -10   8   2    6.21    0.21 
 -10  -8   4   -0.01    0.04 
  10  -8  -4    0.04    0.06 
 -10  -8   4   -0.02    0.05 
 -10   8   4    0.03    0.05 
 -10  -8   6    3.54    0.17 
  10  -8  -6    3.65    0.19 
 -10  -8   6    3.36    0.14 
 -10   8   6    3.40    0.16 
 -10  -8   8    0.18    0.07 
  10  -8  -8    0.24    0.07 
 -10   8   8    0.18    0.06 
  10  -8 -10    1.20    0.12 
 -10  -8  10    1.45    0.13 
 -10   8  10    1.23    0.12 
  10  -8 -12    9.81    0.32 
 -10  -8  12   10.39    0.32 
 -10   8  12   10.02    0.30 
 -10  -8  14    0.14    0.07 
 -10   8  14    0.07    0.06 
 -10  -8  16    0.30    0.09 
 -10   8  16    0.11    0.06 
 -10  -8  18    9.85    0.33 
 -10   8  18    9.79    0.32 
 -10  -8  20    2.10    0.18 
 -10   8  20    1.89    0.16 
 -10  -8  22    4.08    0.23 
 -10   8  22    4.15    0.22 
 -10  -8  24   11.94    0.40 
 -10   8  24   12.63    0.39 
 -10  -8  26    3.90    0.25 
 -10   8  26    4.46    0.24 
  10  -9  21    0.11    0.10 
 -10  -9 -21    0.14    0.09 
  10  -9  19    1.00    0.15 
 -10  -9 -19    1.06    0.13 
  10  -9  17   -0.12    0.08 
 -10  -9 -17    0.20    0.09 
 -10  -9 -15    0.83    0.12 
  10  -9  15    1.15    0.16 
  10  -9  13    0.25    0.10 
 -10  -9 -13    0.22    0.08 
 -10  -9 -11    1.88    0.16 
  10  -9  11    1.61    0.17 
 -10  -9  -9    2.08    0.16 
  10  -9   9    2.20    0.19 
  10  -9   7    0.09    0.07 
 -10  -9  -7    0.08    0.06 
 -10  -9  -5    6.09    0.23 
  10  -9   5    6.15    0.27 
 -10  -9  -3    0.67    0.09 
  10  -9   3    0.86    0.12 
  10  -9   1    2.43    0.18 
 -10  -9  -1    2.28    0.14 
 -10  -9   1    2.31    0.14 
  10  -9  -1    2.08    0.17 
 -10   9   1    2.03    0.14 
 -10  -9   3    0.72    0.11 
 -10  -9   3    0.59    0.08 
  10  -9  -3    0.57    0.10 
 -10   9   3    0.67    0.10 
 -10  -9   5    5.45    0.23 
  10  -9  -5    5.59    0.24 
 -10   9   5    5.40    0.22 
 -10  -9   7    0.61    0.11 
  10  -9  -7    0.53    0.10 
 -10   9   7    0.67    0.10 
  10  -9  -9    4.58    0.22 
 -10  -9   9    4.11    0.21 
 -10   9   9    4.65    0.21 
 -10  -9  11    4.63    0.22 
 -10   9  11    4.84    0.22 
 -10  -9  13    0.42    0.10 
 -10   9  13    0.47    0.10 
 -10  -9  15    5.06    0.24 
 -10   9  15    5.17    0.24 
 -10  -9  17    0.69    0.12 
 -10   9  17    0.68    0.11 
 -10  -9  19    1.17    0.15 
 -10   9  19    0.95    0.13 
 -10  -9  21    2.15    0.19 
 -10   9  21    2.43    0.19 
 -10  -9  23   -0.05    0.08 
 -10   9  23    0.06    0.08 
 -10 -10 -16    1.81    0.17 
  10 -10  16    1.81    0.19 
  10 -10  14   11.69    0.41 
 -10 -10 -14   11.76    0.37 
  10 -10  12   19.14    0.53 
 -10 -10 -12   17.72    0.46 
 -10 -10 -10    0.91    0.12 
  10 -10  10    0.69    0.13 
  10 -10   8    9.54    0.36 
 -10 -10  -8    9.74    0.31 
  10 -10   6    3.81    0.24 
 -10 -10  -6    3.40    0.19 
 -10 -10  -4    4.73    0.21 
  10 -10   4    4.85    0.25 
 -10 -10  -2    3.57    0.18 
  10 -10   2    3.52    0.22 
 -10 -10   0    0.10    0.06 
  10 -10   0    0.22    0.09 
  10 -10  -2    5.82    0.26 
 -10 -10   2    6.00    0.24 
 -10 -10   4    0.23    0.08 
  10 -10  -4    0.08    0.08 
 -10  10   4    0.02    0.06 
 -10 -10   6    0.11    0.07 
  10 -10  -6    0.06    0.08 
 -10  10   6   -0.06    0.05 
 -10 -10   8    0.19    0.08 
 -10  10   8    0.09    0.07 
 -10 -10  10    1.56    0.16 
 -10  10  10    1.47    0.15 
 -10 -10  12    0.67    0.12 
 -10  10  12    0.77    0.11 
 -10 -10  14    0.12    0.08 
 -10  10  14   -0.01    0.07 
 -10 -10  16    0.50    0.11 
 -10  10  16    0.43    0.10 
 -10 -10  18    6.25    0.29 
 -10  10  18    6.51    0.28 
 -10 -10  20    0.26    0.11 
 -10 -11 -11    1.64    0.16 
 -10 -11  -9    0.80    0.13 
  10 -11   9    0.72    0.14 
 -10 -11  -7    0.06    0.08 
  10 -11   7    0.19    0.11 
 -10 -11  -5    0.11    0.08 
  10 -11   5    0.14    0.10 
 -10 -11  -3    0.16    0.08 
  10 -11   3    0.21    0.10 
 -10 -11  -1    1.28    0.15 
  10 -11   1    1.22    0.15 
 -10 -11   1    1.07    0.14 
  10 -11  -1    1.03    0.14 
  10 -11  -3    0.36    0.11 
 -10 -11   3    0.17    0.09 
  10 -11  -5    0.91    0.14 
 -10 -11   5    1.20    0.15 
 -10 -11   7    0.35    0.11 
 -10  11   7    0.33    0.09 
 -10 -11   9    0.71    0.13 
 -10  11   9    0.80    0.12 
 -10 -11  11    0.94    0.14 
 -10  11  11    0.94    0.13 
 -10 -11  13    0.12    0.09 
 -10  11  13    0.19    0.09 
 -10 -11  15    2.47    0.21 
 -10 -12  -4    4.46    0.36 
  10 -12   2    1.42    0.26 
 -10 -12  -2    1.19    0.14 
  10 -12   0   -0.08    0.09 
 -10 -12   0    0.02    0.08 
  10 -12  -2    0.97    0.15 
 -10 -12   2    1.35    0.16 
 -10 -12   4   -0.06    0.07 
 -10 -12   6   -0.09    0.08 
 -10 -12   8    0.67    0.19 
  11   0  33    0.03    0.08 
  11   0  31    0.00    0.08 
  11   0  29   -0.06    0.07 
  11   0  27    0.09    0.07 
  11   0  25   -0.06    0.07 
  11   0  23    0.03    0.06 
 -11   0 -23    0.04    0.04 
  11   0  21    0.03    0.06 
 -11   0 -21   -0.06    0.04 
 -11   0 -19    0.03    0.04 
  11   0  19   -0.02    0.05 
  11   0  17    0.05    0.05 
 -11   0 -17    0.01    0.04 
  11   0  17    0.01    0.04 
  11   0  15    0.09    0.05 
  11   0  15    0.05    0.04 
 -11   0 -15    0.07    0.04 
  11   0  13    0.10    0.05 
 -11   0 -13    0.02    0.04 
  11   0  13    0.03    0.05 
 -11   0 -11    0.04    0.03 
  11   0  11    0.05    0.04 
  11   0  11    0.05    0.04 
 -11   0  -9   -0.03    0.03 
  11   0   9    0.04    0.03 
 -11   0  -7    0.06    0.03 
 -11   0  -5    0.06    0.03 
 -11   0  -3   -0.05    0.03 
 -11   0  -1    0.07    0.03 
 -11   0   1   -0.01    0.02 
 -11   0   3    0.03    0.03 
 -11   0   5   -0.06    0.02 
 -11   0   5   -0.09    0.03 
 -11   0   7    0.00    0.02 
 -11   0   7    0.00    0.03 
 -11   0   9    0.08    0.03 
 -11   0   9    0.00    0.03 
 -11   0  11    0.01    0.03 
 -11   0  11    0.01    0.03 
 -11   0  13    0.00    0.03 
 -11   0  13   -0.01    0.03 
 -11   0  15   -0.01    0.04 
 -11   0  15   -0.01    0.03 
 -11   0  17   -0.05    0.04 
 -11   0  17    0.00    0.03 
 -11   0  19    0.04    0.04 
 -11   0  19    0.07    0.05 
 -11   0  21    0.04    0.04 
 -11   0  21    0.01    0.05 
 -11   0  23    0.07    0.04 
 -11   0  23    0.04    0.06 
 -11   0  25    0.04    0.04 
 -11   0  25   -0.02    0.06 
 -11   0  27   -0.04    0.06 
 -11   0  29    0.09    0.08 
 -11   0  31    0.00    0.07 
 -11   0  33   -0.08    0.08 
 -11   0  35   -0.01    0.09 
 -11   0  37    0.02    0.09 
  11  -1  34   21.14    0.56 
  11  -1  32    1.75    0.18 
  11   1  32    2.12    0.19 
  11  -1  30    0.11    0.08 
  11   1  30    0.03    0.08 
  11  -1  28   19.27    0.49 
  11   1  28   19.77    0.49 
  11  -1  26    3.61    0.20 
  11   1  26    3.61    0.20 
  11  -1  24    0.60    0.10 
 -11  -1 -24    0.21    0.06 
  11   1  24    0.25    0.07 
  11  -1  22    6.56    0.24 
 -11  -1 -22    6.23    0.20 
  11   1  22    6.21    0.23 
  11  -1  20   18.80    0.42 
 -11  -1 -20   18.44    0.38 
  11  -1  20   19.11    0.38 
  11   1  20   18.72    0.42 
 -11   1 -20   18.70    0.36 
 -11  -1 -18    7.05    0.21 
  11  -1  18    7.16    0.21 
  11  -1  18    6.80    0.22 
 -11   1 -18    7.58    0.20 
  11   1  18    7.45    0.24 
  11  -1  16    5.17    0.18 
  11  -1  16    5.58    0.18 
 -11  -1 -16    5.82    0.18 
 -11   1 -16    5.58    0.16 
  11   1  16    5.09    0.19 
  11  -1  14    0.30    0.06 
 -11  -1 -14    0.61    0.07 
  11  -1  14    0.22    0.05 
  11   1  14    0.22    0.05 
 -11   1 -14    0.39    0.05 
  11  -1  12   30.75    0.52 
 -11  -1 -12   30.56    0.51 
  11  -1  12   31.15    0.51 
  11   1  12   30.82    0.52 
 -11   1 -12   29.38    0.49 
  11  -1  10   35.26    0.57 
 -11  -1 -10   34.20    0.55 
  11  -1  10   34.18    0.54 
 -11   1 -10   35.06    0.54 
  11  -1   8    7.59    0.20 
  11  -1   8    7.79    0.18 
 -11   1  -8    7.98    0.19 
  11  -1   6   17.60    0.34 
 -11   1  -6   17.11    0.31 
  11  -1   4   60.00    0.87 
 -11   1  -4   59.75    0.85 
 -11  -1  -2   18.14    0.32 
 -11   1  -2   18.41    0.32 
 -11  -1   0    1.94    0.09 
 -11   1   0    1.57    0.08 
 -11  -1   2  363.26    4.90 
 -11   1   2  377.32    5.07 
 -11  -1   4   14.57    0.27 
 -11   1   4   14.51    0.23 
 -11   1   4   14.42    0.27 
 -11  -1   6   10.08    0.21 
 -11  -1   6   10.22    0.21 
 -11   1   6   10.23    0.22 
 -11   1   6   10.39    0.19 
 -11  -1   8  241.50    3.09 
 -11  -1   8  238.57    3.28 
 -11   1   8  245.71    3.23 
 -11   1   8  242.40    3.34 
 -11  -1  10   18.67    0.34 
 -11  -1  10   18.98    0.33 
 -11   1  10   18.16    0.33 
 -11   1  10   18.32    0.31 
 -11  -1  12   54.88    0.80 
 -11  -1  12   53.42    0.78 
 -11   1  12   54.49    0.78 
 -11   1  12   55.69    0.80 
 -11  -1  14  159.83    2.06 
 -11  -1  14  158.39    2.10 
 -11   1  14  157.45    2.07 
 -11   1  14  156.59    2.08 
 -11  -1  16   84.89    1.16 
 -11  -1  16   85.78    1.21 
 -11   1  16   84.79    1.19 
 -11   1  16   84.61    1.19 
 -11  -1  18   52.73    0.75 
 -11  -1  18   50.50    0.81 
 -11   1  18   51.01    0.78 
 -11   1  18   51.67    0.79 
 -11  -1  20   34.39    0.61 
 -11  -1  20   34.14    0.54 
 -11   1  20   34.28    0.57 
 -11   1  20   33.55    0.59 
 -11  -1  22  126.84    1.66 
 -11  -1  22  124.81    1.76 
 -11   1  22  123.32    1.69 
 -11   1  22  121.98    1.74 
 -11  -1  24   21.60    0.47 
 -11   1  24   22.01    0.42 
 -11   1  24   21.44    0.46 
 -11  -1  26    0.04    0.06 
 -11   1  26    0.27    0.08 
 -11   1  26    0.04    0.05 
 -11  -1  28   84.46    1.34 
 -11   1  28   85.18    1.24 
 -11   1  28   85.97    1.32 
 -11  -1  30    0.31    0.10 
 -11   1  30    0.33    0.09 
 -11  -1  32    2.59    0.19 
 -11   1  32    2.54    0.19 
 -11  -1  34   52.19    0.98 
 -11   1  34   51.75    0.95 
 -11  -1  36    3.54    0.23 
 -11   1  36    3.21    0.22 
  11  -2  33    2.84    0.22 
  11   2  33    2.67    0.22 
  11  -2  31   10.73    0.37 
  11   2  31   10.44    0.36 
  11  -2  29    0.11    0.08 
  11   2  29    0.19    0.09 
  11  -2  27   10.75    0.34 
 -11  -2 -27   10.34    0.29 
  11   2  27   10.29    0.34 
 -11  -2 -25    7.52    0.24 
  11  -2  25    7.52    0.27 
  11   2  25    7.59    0.28 
 -11  -2 -23    9.72    0.27 
  11  -2  23    9.67    0.30 
  11   2  23    9.98    0.31 
  11  -2  21   29.10    0.54 
  11  -2  21   29.73    0.57 
 -11  -2 -21   28.91    0.54 
  11   2  21   29.75    0.58 
  11  -2  19    4.66    0.18 
 -11  -2 -19    4.20    0.17 
  11  -2  19    4.32    0.18 
  11   2  19    4.26    0.19 
  11  -2  17   32.56    0.57 
  11  -2  17   32.06    0.57 
 -11  -2 -17   32.75    0.56 
 -11   2 -17   32.06    0.52 
  11   2  17   32.07    0.59 
 -11  -2 -15   32.48    0.56 
  11  -2  15   33.48    0.57 
  11  -2  15   33.62    0.57 
 -11   2 -15   33.50    0.52 
  11   2  15   32.57    0.58 
  11  -2  13    0.95    0.09 
  11  -2  13    0.89    0.09 
 -11  -2 -13    0.95    0.09 
 -11   2 -13    0.96    0.08 
  11  -2  11   37.36    0.61 
 -11  -2 -11   36.52    0.59 
  11  -2  11   36.92    0.58 
 -11   2 -11   36.75    0.56 
 -11  -2  -9    9.06    0.22 
  11  -2   9    9.11    0.23 
  11  -2   9    8.77    0.20 
 -11   2  -9    9.36    0.20 
  11  -2   7   28.67    0.43 
  11  -2   7   28.55    0.49 
 -11   2  -7   26.90    0.45 
 -11  -2  -5   51.74    0.76 
  11  -2   5   51.51    0.78 
  11  -2   5   50.77    0.71 
 -11   2  -5   51.98    0.74 
 -11  -2  -3    2.74    0.11 
  11  -2   3    2.72    0.12 
 -11   2  -3    2.63    0.10 
 -11  -2  -1   19.33    0.34 
  11  -2   1   19.85    0.37 
 -11   2  -1   19.40    0.34 
  11  -2  -1   10.89    0.25 
 -11   2   1   10.81    0.23 
 -11  -2   3    0.15    0.04 
 -11   2   3    0.15    0.02 
 -11   2   3    0.18    0.04 
 -11  -2   5    6.93    0.17 
 -11   2   5    6.57    0.12 
 -11   2   5    6.67    0.17 
 -11  -2   7    0.27    0.04 
 -11  -2   7    0.25    0.04 
 -11   2   7    0.29    0.03 
 -11   2   7    0.31    0.05 
 -11  -2   9    6.58    0.16 
 -11  -2   9    6.49    0.18 
 -11   2   9    6.57    0.14 
 -11   2   9    6.60    0.18 
 -11  -2  11    7.42    0.20 
 -11  -2  11    7.48    0.17 
 -11   2  11    7.73    0.20 
 -11   2  11    7.70    0.17 
 -11  -2  13    0.14    0.05 
 -11  -2  13    0.19    0.04 
 -11   2  13    0.19    0.04 
 -11   2  13    0.24    0.05 
 -11  -2  15    0.22    0.05 
 -11  -2  15    0.17    0.04 
 -11   2  15    0.21    0.05 
 -11   2  15    0.18    0.05 
 -11  -2  17    0.28    0.05 
 -11  -2  17    0.30    0.06 
 -11   2  17    0.25    0.06 
 -11   2  17    0.35    0.06 
 -11  -2  19    1.43    0.12 
 -11  -2  19    1.34    0.08 
 -11   2  19    1.34    0.10 
 -11   2  19    1.55    0.11 
 -11  -2  21    0.23    0.05 
 -11  -2  21    0.15    0.06 
 -11   2  21    0.20    0.05 
 -11   2  21    0.16    0.06 
 -11  -2  23    0.37    0.08 
 -11   2  23    0.54    0.07 
 -11   2  23    0.41    0.07 
 -11  -2  25    1.54    0.14 
 -11   2  25    1.70    0.12 
 -11   2  25    1.66    0.13 
 -11  -2  27    0.05    0.07 
 -11   2  27    0.11    0.05 
 -11   2  27    0.19    0.08 
 -11  -2  29    4.02    0.22 
 -11   2  29    4.09    0.18 
 -11   2  29    4.14    0.20 
 -11  -2  31    4.63    0.25 
 -11   2  31    4.14    0.21 
 -11  -2  33    0.31    0.11 
 -11  -2  35    5.24    0.28 
  11  -3  32    3.54    0.23 
  11   3  32    3.21    0.22 
  11  -3  30    0.12    0.09 
  11   3  30    0.16    0.09 
  11  -3  28   12.45    0.38 
 -11  -3 -28   12.63    0.34 
  11   3  28   12.36    0.39 
  11  -3  26    1.69    0.16 
 -11  -3 -26    1.81    0.14 
  11   3  26    1.73    0.16 
 -11  -3 -24    1.00    0.11 
  11  -3  24    0.94    0.11 
  11   3  24    1.32    0.14 
  11  -3  22    1.58    0.13 
 -11  -3 -22    1.63    0.12 
  11  -3  22    1.70    0.14 
  11   3  22    1.58    0.14 
  11  -3  20   17.22    0.39 
  11  -3  20   16.54    0.38 
 -11  -3 -20   16.94    0.38 
  11   3  20   16.57    0.41 
 -11  -3 -18    9.97    0.27 
  11  -3  18   10.02    0.28 
  11  -3  18    9.79    0.27 
 -11  -3 -16    1.57    0.11 
  11  -3  16    1.56    0.12 
  11  -3  16    1.53    0.11 
 -11  -3 -14    2.09    0.12 
  11  -3  14    2.19    0.12 
  11  -3  14    2.07    0.13 
 -11   3 -14    1.99    0.09 
 -11  -3 -12   22.98    0.43 
  11  -3  12   23.10    0.40 
  11  -3  12   22.21    0.44 
 -11   3 -12   22.44    0.38 
  11  -3  10   20.87    0.36 
  11  -3  10   20.73    0.41 
 -11  -3 -10   20.93    0.39 
 -11   3 -10   20.80    0.36 
  11  -3   8    5.37    0.18 
 -11  -3  -8    5.35    0.17 
  11  -3   8    5.23    0.14 
 -11   3  -8    5.22    0.15 
  11  -3   6   55.24    0.77 
 -11  -3  -6   55.97    0.83 
  11  -3   6   56.87    0.86 
 -11   3  -6   56.71    0.80 
  11  -3   4   17.67    0.27 
  11  -3   4   18.91    0.37 
 -11  -3  -4   17.10    0.33 
 -11   3  -4   17.41    0.32 
 -11  -3  -2    0.15    0.04 
  11  -3   2    0.21    0.05 
 -11   3  -2    0.18    0.04 
 -11  -3   0    5.32    0.15 
  11  -3   0    5.28    0.18 
 -11   3   0    5.48    0.15 
 -11  -3   2  141.68    1.88 
  11  -3  -2  141.58    1.92 
 -11   3   2  146.99    1.89 
  11  -3  -4    0.02    0.05 
 -11  -3   4    0.02    0.03 
 -11   3   4    0.02    0.03 
 -11  -3   6   10.58    0.22 
 -11   3   6   10.65    0.24 
 -11  -3   8  130.30    1.68 
 -11  -3   8  127.34    1.72 
 -11   3   8  126.15    1.63 
 -11   3   8  127.11    1.71 
 -11  -3  10    9.93    0.24 
 -11  -3  10    9.97    0.21 
 -11   3  10    9.72    0.18 
 -11   3  10   10.06    0.24 
 -11  -3  12   19.06    0.38 
 -11  -3  12   19.96    0.34 
 -11   3  12   20.28    0.38 
 -11   3  12   19.45    0.32 
 -11  -3  14   62.77    0.85 
 -11  -3  14   60.00    0.92 
 -11   3  14   60.17    0.85 
 -11   3  14   59.96    0.91 
 -11  -3  16   67.74    0.93 
 -11  -3  16   68.43    1.02 
 -11   3  16   65.69    0.95 
 -11   3  16   66.42    0.99 
 -11  -3  18   20.30    0.34 
 -11  -3  18   19.67    0.42 
 -11   3  18   19.83    0.37 
 -11   3  18   20.07    0.40 
 -11  -3  20   23.31    0.48 
 -11   3  20   22.95    0.45 
 -11   3  20   23.63    0.44 
 -11  -3  22   71.93    1.12 
 -11   3  22   69.27    1.06 
 -11   3  22   71.86    1.08 
 -11  -3  24    7.15    0.26 
 -11   3  24    7.23    0.23 
 -11  -3  26    1.68    0.16 
 -11   3  26    1.51    0.12 
 -11  -3  28   26.44    0.59 
 -11   3  28   27.48    0.54 
 -11  -3  30    1.75    0.18 
 -11   3  30    1.70    0.14 
 -11  -3  32    0.67    0.13 
 -11   3  32    0.74    0.11 
 -11  -3  34   17.89    0.51 
  11  -4  33    4.05    0.25 
  11  -4  31   21.56    0.54 
 -11  -4 -31   21.89    0.51 
 -11  -4 -29    0.47    0.10 
  11  -4  29    0.52    0.11 
  11  -4  27   24.95    0.56 
 -11  -4 -27   24.64    0.53 
 -11  -4 -25   26.66    0.56 
  11  -4  25   27.72    0.58 
  11  -4  25   26.90    0.57 
 -11  -4 -23    7.70    0.26 
  11  -4  23    7.32    0.26 
  11  -4  23    7.68    0.27 
  11  -4  21   63.37    1.02 
  11  -4  21   63.95    1.01 
 -11  -4 -21   63.79    1.01 
  11  -4  19   17.90    0.39 
 -11  -4 -19   17.23    0.40 
  11  -4  19   17.44    0.41 
 -11  -4 -17   52.28    0.85 
  11  -4  17   52.29    0.87 
  11  -4  17   52.70    0.83 
 -11  -4 -15   66.50    1.02 
  11  -4  15   65.77    1.03 
  11  -4  15   66.90    0.99 
  11  -4  13    0.17    0.07 
 -11  -4 -13    0.30    0.07 
  11  -4  13    0.28    0.06 
 -11   4 -13    0.24    0.04 
 -11  -4 -11  104.58    1.50 
  11  -4  11  107.68    1.53 
  11  -4  11  108.81    1.45 
 -11   4 -11  106.42    1.43 
  11  -4   9   27.07    0.51 
  11  -4   9   27.36    0.44 
 -11  -4  -9   27.66    0.49 
 -11   4  -9   27.45    0.44 
  11  -4   7   33.07    0.49 
  11  -4   7   32.40    0.58 
 -11  -4  -7   32.88    0.55 
 -11   4  -7   33.70    0.52 
  11  -4   5  105.20    1.35 
  11  -4   5  103.04    1.48 
 -11  -4  -5  104.41    1.44 
 -11   4  -5  106.69    1.41 
 -11  -4  -3    0.41    0.06 
  11  -4   3    0.31    0.06 
 -11   4  -3    0.37    0.05 
 -11  -4  -1   83.60    1.15 
  11  -4   1   80.23    1.19 
 -11   4  -1   83.81    1.15 
 -11  -4   1   37.27    0.58 
  11  -4  -1   36.52    0.62 
 -11   4   1   36.53    0.58 
  11  -4  -3   18.65    0.38 
 -11  -4   3   19.11    0.34 
 -11   4   3   18.68    0.35 
 -11  -4   5   59.22    0.85 
  11  -4  -5   61.14    0.91 
 -11   4   5   59.43    0.88 
  11  -4  -7    6.39    0.20 
 -11  -4   7    6.44    0.16 
 -11  -4   7    6.15    0.19 
 -11   4   7    6.27    0.19 
 -11  -4   9   25.19    0.41 
 -11  -4   9   24.67    0.46 
 -11   4   9   24.32    0.45 
 -11  -4  11   17.75    0.31 
 -11  -4  11   17.45    0.37 
 -11   4  11   18.15    0.36 
 -11  -4  13    0.58    0.06 
 -11  -4  13    0.50    0.07 
 -11   4  13    0.58    0.08 
 -11  -4  15    6.09    0.15 
 -11  -4  15    6.05    0.21 
 -11   4  15    6.09    0.20 
 -11  -4  17    2.53    0.15 
 -11   4  17    2.54    0.13 
 -11  -4  19    2.40    0.15 
 -11   4  19    2.55    0.14 
 -11  -4  21    0.19    0.07 
 -11   4  21    0.23    0.06 
 -11  -4  23    0.43    0.09 
 -11   4  23    0.56    0.08 
 -11  -4  25    6.89    0.27 
 -11   4  25    6.68    0.24 
 -11  -4  27    2.27    0.19 
 -11   4  27    2.52    0.16 
 -11  -4  29    2.01    0.19 
 -11   4  29    1.97    0.15 
 -11  -4  31    9.55    0.36 
 -11   4  31    9.41    0.31 
 -11  -4  33    0.04    0.09 
 -11   4  33    0.11    0.08 
  11  -5  32    4.17    0.25 
 -11  -5 -32    4.25    0.23 
 -11  -5 -30    0.20    0.08 
  11  -5  30    0.29    0.10 
  11  -5  28    3.43    0.21 
 -11  -5 -28    3.70    0.21 
  11  -5  26    0.98    0.13 
  11  -5  26    1.13    0.14 
 -11  -5 -26    0.87    0.12 
  11  -5  24    1.78    0.16 
 -11  -5 -24    1.82    0.15 
  11  -5  24    1.95    0.15 
  11  -5  22    0.58    0.10 
 -11  -5 -22    0.42    0.08 
  11  -5  22    0.50    0.10 
  11  -5  20    9.70    0.28 
 -11  -5 -20    9.78    0.30 
  11  -5  20    9.79    0.31 
  11  -5  18    4.35    0.18 
  11  -5  18    4.10    0.20 
 -11  -5 -18    4.06    0.19 
  11  -5  16    1.09    0.12 
  11  -5  16    1.17    0.10 
 -11  -5 -16    0.97    0.10 
 -11  -5 -14    6.65    0.23 
  11  -5  14    6.82    0.20 
  11  -5  14    7.05    0.25 
 -11  -5 -12    2.78    0.14 
  11  -5  12    2.92    0.12 
  11  -5  12    2.98    0.17 
 -11  -5 -10    7.60    0.23 
  11  -5  10    7.35    0.18 
  11  -5  10    7.41    0.25 
 -11   5 -10    7.42    0.18 
  11  -5   8    0.59    0.09 
 -11  -5  -8    0.36    0.06 
  11  -5   8    0.58    0.06 
 -11   5  -8    0.49    0.06 
  11  -5   6   15.63    0.36 
 -11  -5  -6   15.30    0.33 
 -11   5  -6   16.17    0.31 
 -11  -5  -4    0.66    0.08 
  11  -5   4    0.76    0.09 
 -11   5  -4    0.70    0.07 
  11  -5   2    3.49    0.16 
 -11  -5  -2    3.42    0.14 
 -11   5  -2    3.42    0.13 
  11  -5   0    6.09    0.21 
 -11  -5   0    6.53    0.18 
 -11   5   0    6.37    0.18 
  11  -5  -2   10.08    0.27 
 -11  -5   2    9.90    0.23 
 -11   5   2   10.17    0.24 
 -11  -5   4    1.50    0.09 
  11  -5  -4    1.57    0.12 
 -11   5   4    1.51    0.10 
 -11  -5   6    2.81    0.13 
  11  -5  -6    3.06    0.15 
 -11  -5   6    2.99    0.12 
 -11   5   6    3.04    0.13 
  11  -5  -8    8.89    0.25 
 -11  -5   8    8.94    0.20 
 -11  -5   8    8.89    0.24 
 -11   5   8    8.82    0.24 
 -11  -5  10    0.81    0.09 
 -11  -5  10    0.99    0.07 
 -11   5  10    0.85    0.09 
 -11  -5  12    6.25    0.16 
 -11  -5  12    6.14    0.21 
 -11   5  12    5.86    0.20 
 -11  -5  14    3.73    0.17 
 -11   5  14    3.48    0.16 
 -11  -5  16    4.27    0.19 
 -11   5  16    4.08    0.18 
 -11  -5  18    4.95    0.21 
 -11   5  18    5.18    0.20 
 -11  -5  20    1.52    0.14 
 -11   5  20    1.49    0.12 
 -11  -5  22    6.65    0.26 
 -11   5  22    6.86    0.24 
 -11  -5  24    1.89    0.16 
 -11   5  24    1.97    0.15 
 -11  -5  26    1.57    0.16 
 -11   5  26    1.73    0.15 
 -11  -5  28    1.44    0.16 
 -11   5  28    1.37    0.14 
 -11  -5  30    4.29    0.26 
 -11   5  30    4.52    0.22 
 -11  -5  32    0.53    0.13 
 -11   5  32    0.42    0.10 
 -11   5  34    2.77    0.20 
 -11  -6 -29    0.91    0.13 
  11  -6  27   18.77    0.50 
 -11  -6 -27   19.57    0.49 
 -11  -6 -25   24.03    0.55 
  11  -6  25   24.03    0.57 
  11  -6  23    2.54    0.19 
 -11  -6 -23    2.38    0.18 
  11  -6  21   47.89    0.88 
 -11  -6 -21   48.96    0.86 
 -11  -6 -19    7.59    0.27 
  11  -6  19    7.48    0.29 
  11  -6  17   33.29    0.67 
 -11  -6 -17   34.03    0.65 
 -11  -6 -15   45.22    0.78 
  11  -6  15   45.21    0.81 
  11  -6  13    3.69    0.20 
 -11  -6 -13    3.74    0.18 
  11  -6  11   83.34    1.29 
 -11  -6 -11   85.25    1.26 
  11  -6   9   20.23    0.45 
 -11  -6  -9   20.29    0.43 
  11  -6   7   30.08    0.58 
 -11  -6  -7   30.04    0.55 
 -11   6  -7   30.31    0.50 
 -11  -6  -5   87.68    1.25 
  11  -6   5   84.28    1.29 
 -11   6  -5   87.63    1.21 
 -11  -6  -3    0.14    0.05 
  11  -6   3    0.24    0.07 
 -11   6  -3    0.19    0.05 
  11  -6   1   65.25    1.01 
 -11  -6  -1   64.59    0.96 
 -11   6  -1   65.09    0.96 
 -11  -6   1   31.06    0.52 
  11  -6  -1   30.27    0.57 
 -11   6   1   31.06    0.53 
  11  -6  -3    8.61    0.26 
 -11  -6   3    8.65    0.22 
 -11   6   3    8.56    0.23 
 -11  -6   5   31.17    0.51 
  11  -6  -5   30.82    0.56 
 -11   6   5   30.60    0.54 
 -11  -6   7    5.41    0.20 
  11  -6  -7    5.46    0.20 
 -11  -6   7    5.31    0.16 
 -11   6   7    5.36    0.19 
  11  -6  -9    7.23    0.23 
 -11  -6   9    7.43    0.24 
 -11  -6   9    7.37    0.19 
 -11   6   9    7.72    0.23 
 -11  -6  11    2.60    0.15 
 -11  -6  11    2.38    0.10 
  11  -6 -11    2.38    0.14 
 -11   6  11    2.45    0.14 
 -11  -6  13    2.25    0.15 
 -11   6  13    2.16    0.13 
 -11  -6  15    3.32    0.18 
 -11   6  15    3.27    0.16 
 -11  -6  17    0.44    0.09 
 -11   6  17    0.46    0.08 
 -11  -6  19    0.27    0.09 
 -11   6  19    0.15    0.07 
 -11  -6  21    0.46    0.10 
 -11   6  21    0.50    0.09 
 -11  -6  23    0.30    0.09 
 -11   6  23    0.37    0.08 
 -11  -6  25    2.22    0.19 
 -11   6  25    2.24    0.17 
 -11  -6  27    0.86    0.13 
 -11   6  27    1.01    0.12 
 -11  -6  29    0.80    0.13 
 -11   6  29    0.86    0.12 
 -11   6  31    5.12    0.25 
  11  -7  28   -0.11    0.08 
 -11  -7 -26    0.31    0.10 
  11  -7  26    0.21    0.11 
  11  -7  24    2.09    0.20 
 -11  -7 -24    1.76    0.17 
 -11  -7 -22    0.79    0.12 
  11  -7  22    0.54    0.12 
  11  -7  20    2.03    0.19 
 -11  -7 -20    2.02    0.16 
 -11  -7 -18    1.15    0.13 
  11  -7  18    1.26    0.15 
 -11  -7 -16    1.71    0.15 
  11  -7  16    1.66    0.16 
 -11  -7 -14    5.79    0.23 
  11  -7  14    5.95    0.26 
  11  -7  12   -0.11    0.06 
 -11  -7 -12    0.00    0.05 
  11  -7  10    1.10    0.13 
 -11  -7 -10    1.15    0.11 
  11  -7   8   11.22    0.33 
 -11  -7  -8   11.50    0.31 
 -11  -7  -6    1.86    0.12 
  11  -7   6    1.73    0.15 
 -11   7  -6    1.84    0.12 
 -11  -7  -4    4.15    0.17 
  11  -7   4    4.30    0.20 
 -11   7  -4    4.09    0.15 
 -11  -7  -2   21.21    0.42 
  11  -7   2   20.95    0.46 
 -11   7  -2   21.25    0.41 
  11  -7   0   11.91    0.33 
 -11  -7   0   11.89    0.29 
 -11   7   0   11.78    0.29 
  11  -7  -2   11.62    0.32 
 -11  -7   2   11.96    0.28 
 -11   7   2   11.85    0.29 
 -11  -7   4   15.25    0.32 
  11  -7  -4   15.34    0.37 
 -11   7   4   15.61    0.35 
  11  -7  -6   27.45    0.54 
 -11  -7   6   28.36    0.48 
 -11  -7   6   26.86    0.54 
 -11   7   6   28.30    0.53 
 -11  -7   8   15.95    0.39 
 -11  -7   8   16.81    0.33 
  11  -7  -8   16.57    0.38 
 -11   7   8   16.81    0.38 
 -11  -7  10    3.36    0.18 
  11  -7 -10    3.30    0.18 
 -11   7  10    3.47    0.17 
 -11  -7  12   37.22    0.69 
  11  -7 -12   37.40    0.66 
 -11   7  12   37.66    0.68 
 -11  -7  14    3.44    0.19 
 -11   7  14    3.27    0.17 
 -11  -7  16    2.39    0.16 
 -11   7  16    2.43    0.16 
 -11  -7  18   36.83    0.71 
 -11   7  18   35.88    0.69 
 -11  -7  20   -0.05    0.08 
 -11   7  20    0.12    0.07 
 -11  -7  22    3.98    0.23 
 -11   7  22    3.95    0.21 
 -11  -7  24   12.50    0.40 
 -11   7  24   12.29    0.37 
 -11  -7  26    5.48    0.28 
 -11   7  26    6.23    0.27 
 -11  -7  28    6.04    0.29 
 -11   7  28    6.09    0.27 
  11  -8  25    3.95    0.26 
 -11  -8 -23    2.89    0.20 
  11  -8  23    2.60    0.22 
  11  -8  21   13.48    0.43 
 -11  -8 -21   13.81    0.41 
  11  -8  19    1.18    0.16 
 -11  -8 -19    1.07    0.13 
 -11  -8 -17   16.09    0.43 
  11  -8  17   15.46    0.45 
  11  -8  15    9.87    0.35 
 -11  -8 -15    9.87    0.32 
 -11  -8 -13    0.69    0.11 
  11  -8  13    0.83    0.13 
  11  -8  11   15.50    0.43 
 -11  -8 -11   16.16    0.40 
  11  -8   9    2.09    0.18 
 -11  -8  -9    1.90    0.14 
  11  -8   7    8.74    0.31 
 -11  -8  -7    8.93    0.28 
 -11  -8  -5   17.36    0.40 
  11  -8   5   18.62    0.46 
  11  -8   3    0.53    0.09 
 -11  -8  -3    0.56    0.08 
 -11   8  -3    0.70    0.08 
 -11  -8  -1   10.28    0.27 
  11  -8   1    9.60    0.30 
 -11   8  -1    9.55    0.26 
  11  -8  -1    1.99    0.16 
 -11  -8   1    2.19    0.13 
 -11   8   1    2.58    0.14 
 -11  -8   3    4.88    0.18 
  11  -8  -3    5.27    0.22 
 -11   8   3    5.22    0.20 
  11  -8  -5    2.43    0.17 
 -11  -8   5    2.65    0.13 
 -11  -8   5    2.43    0.15 
 -11   8   5    2.69    0.15 
  11  -8  -7    0.17    0.07 
 -11  -8   7    0.19    0.07 
 -11   8   7    0.12    0.06 
 -11  -8   9    5.43    0.23 
  11  -8  -9    4.99    0.21 
 -11   8   9    5.05    0.21 
 -11  -8  11    1.14    0.12 
  11  -8 -11    1.50    0.14 
 -11   8  11    1.20    0.12 
 -11  -8  13    0.36    0.08 
 -11   8  13    0.39    0.08 
 -11  -8  15    0.18    0.08 
 -11   8  15    0.54    0.09 
 -11  -8  17    0.31    0.10 
 -11   8  17    0.17    0.08 
 -11  -8  19    0.35    0.10 
 -11   8  19    0.20    0.08 
 -11  -8  21    0.85    0.14 
 -11   8  21    0.82    0.13 
 -11  -8  23    0.01    0.09 
 -11   8  23   -0.03    0.06 
 -11  -8  25    1.27    0.17 
 -11   8  25    1.10    0.14 
 -11  -9 -20    1.00    0.14 
  11  -9  20    0.60    0.13 
 -11  -9 -18    0.88    0.13 
  11  -9  18    0.69    0.14 
 -11  -9 -16    0.12    0.08 
  11  -9  16    0.13    0.10 
  11  -9  14    5.66    0.28 
 -11  -9 -14    6.12    0.26 
 -11  -9 -12    0.83    0.12 
  11  -9  12    0.98    0.14 
 -11  -9 -10    0.11    0.06 
  11  -9  10    0.11    0.09 
  11  -9   8   11.10    0.37 
 -11  -9  -8   10.93    0.32 
  11  -9   6    0.17    0.08 
 -11  -9  -6    0.11    0.07 
 -11  -9  -4    7.07    0.25 
  11  -9   4    6.77    0.28 
 -11  -9  -2   20.98    0.45 
  11  -9   2   20.65    0.50 
  11  -9   0    2.33    0.18 
 -11  -9   0    2.13    0.14 
 -11   9   0    2.18    0.14 
  11  -9  -2   15.37    0.41 
 -11  -9   2   15.65    0.36 
 -11   9   2   16.05    0.38 
 -11  -9   4    9.64    0.31 
  11  -9  -4    9.27    0.31 
 -11   9   4    9.86    0.29 
 -11  -9   6   14.62    0.39 
  11  -9  -6   14.32    0.39 
 -11   9   6   14.09    0.37 
  11  -9  -8   19.82    0.47 
 -11  -9   8   20.67    0.48 
 -11   9   8   20.33    0.46 
 -11  -9  10    0.15    0.07 
  11  -9 -10    0.11    0.08 
 -11   9  10    0.11    0.06 
 -11  -9  12   42.54    0.79 
 -11   9  12   40.75    0.77 
 -11  -9  14   11.16    0.36 
 -11   9  14   10.25    0.33 
 -11  -9  16    8.84    0.32 
 -11   9  16    8.72    0.31 
 -11  -9  18   50.55    0.94 
 -11   9  18   51.73    0.93 
 -11  -9  20    1.28    0.15 
 -11   9  20    1.09    0.14 
 -11  -9  22   13.89    0.44 
 -11   9  22   13.58    0.41 
  11 -10  15    0.08    0.10 
 -11 -10 -15    0.01    0.08 
  11 -10  13    0.10    0.10 
 -11 -10 -13    0.25    0.09 
 -11 -10 -11   -0.01    0.07 
  11 -10  11    0.05    0.09 
  11 -10   9    0.24    0.11 
 -11 -10  -9    0.46    0.10 
 -11 -10  -7    1.06    0.12 
  11 -10   7    0.77    0.14 
 -11 -10  -5    0.19    0.08 
  11 -10   5    0.18    0.10 
 -11 -10  -3    0.49    0.09 
  11 -10   3    0.48    0.11 
  11 -10   1   -0.03    0.08 
 -11 -10  -1    0.00    0.06 
  11 -10  -1    0.32    0.10 
 -11 -10   1    0.25    0.08 
  11 -10  -3    0.60    0.11 
 -11 -10   3    0.74    0.11 
 -11  10   3    0.54    0.10 
 -11 -10   5    0.81    0.12 
  11 -10  -5    0.79    0.12 
 -11  10   5    0.76    0.11 
  11 -10  -7    0.37    0.10 
 -11 -10   7    0.38    0.10 
 -11  10   7    0.28    0.09 
 -11 -10   9    0.16    0.09 
 -11  10   9    0.32    0.09 
 -11 -10  11    0.14    0.09 
 -11  10  11    0.17    0.08 
 -11 -10  13    0.19    0.09 
 -11  10  13    0.07    0.07 
 -11 -10  15    0.01    0.09 
 -11  10  15    0.18    0.08 
 -11 -10  17    1.61    0.18 
 -11  10  17    1.94    0.18 
 -11 -10  19   -0.10    0.10 
 -11 -11 -10    0.06    0.08 
 -11 -11  -8    4.35    0.24 
  11 -11   8    4.75    0.28 
  11 -11   6   -0.14    0.08 
 -11 -11  -6    0.09    0.08 
 -11 -11  -4    7.70    0.28 
  11 -11   4    7.12    0.32 
  11 -11   2   14.77    0.45 
  11 -11   0    0.83    0.14 
 -11 -11   0    0.90    0.13 
  11 -11  -2   12.51    0.41 
 -11 -11   2   12.57    0.39 
  11 -11  -4    6.86    0.30 
 -11 -11   4    7.09    0.29 
 -11 -11   6    8.36    0.32 
 -11  11   6    8.50    0.30 
 -11 -11   8   14.51    0.43 
 -11  11   8   14.71    0.41 
 -11 -11  10    0.21    0.10 
 -11  11  10    0.34    0.09 
 -11 -11  12   23.71    0.58 
 -11  11  12   24.59    0.58 
 -11 -11  14    8.19    0.38 
 -11 -12  -3    1.12    0.17 
 -11 -12  -1    2.29    0.21 
  11 -12  -1    2.68    0.25 
 -11 -12   1    2.75    0.23 
 -11 -12   3   -0.07    0.09 
  12   0  32   11.79    0.39 
  12   0  30   17.17    0.47 
  12   0  28    1.73    0.16 
  12   0  26    0.21    0.08 
  12   0  24   71.38    1.14 
 -12   0 -22    3.42    0.15 
  12   0  22    3.25    0.17 
 -12   0 -20    4.25    0.16 
  12   0  20    4.14    0.19 
 -12   0 -18  161.41    2.19 
  12   0  18  167.24    2.24 
 -12   0 -16   13.60    0.29 
  12   0  16   13.62    0.29 
  12   0  16   13.97    0.32 
  12   0  14   33.69    0.58 
 -12   0 -14   34.11    0.56 
  12   0  14   34.55    0.56 
 -12   0 -12  126.50    1.71 
  12   0  12  128.02    1.72 
  12   0  10  149.05    1.98 
 -12   0 -10  148.78    1.97 
 -12   0  -8  111.40    1.50 
 -12   0  -6   58.59    0.85 
 -12   0  -4  465.03    6.38 
 -12   0  -2   58.08    0.83 
 -12   0   0    5.33    0.15 
 -12   0   2  463.99    6.26 
 -12   0   4    1.18    0.08 
 -12   0   6   45.36    0.66 
 -12   0   6   46.80    0.68 
 -12   0   8  249.04    3.20 
 -12   0   8  245.60    3.33 
 -12   0  10   14.63    0.28 
 -12   0  10   14.60    0.28 
 -12   0  12   61.33    0.87 
 -12   0  12   60.54    0.87 
 -12   0  14   74.18    1.05 
 -12   0  14   74.12    1.04 
 -12   0  16   71.42    1.02 
 -12   0  16   72.14    1.04 
 -12   0  18    0.52    0.07 
 -12   0  18    0.51    0.06 
 -12   0  20    7.20    0.20 
 -12   0  20    7.27    0.23 
 -12   0  22   55.60    0.90 
 -12   0  22   56.45    0.84 
 -12   0  24    0.34    0.06 
 -12   0  24    0.34    0.08 
 -12   0  26    3.94    0.18 
 -12   0  26    4.33    0.20 
 -12   0  28   10.47    0.33 
 -12   0  30    2.60    0.18 
 -12   0  32    4.14    0.23 
 -12   0  34    1.38    0.16 
 -12   0  36    0.84    0.14 
  12  -1  33    0.63    0.13 
  12   1  33    0.94    0.14 
  12  -1  31    3.37    0.22 
  12   1  31    3.26    0.23 
  12  -1  29    0.10    0.08 
  12   1  29    0.22    0.10 
  12  -1  27    1.72    0.17 
  12   1  27    1.79    0.17 
  12  -1  25    2.91    0.19 
 -12  -1 -25    2.65    0.15 
  12   1  25    2.92    0.19 
 -12  -1 -23    0.02    0.05 
  12  -1  23   -0.06    0.05 
  12   1  23    0.09    0.07 
  12  -1  21    2.12    0.15 
 -12  -1 -21    2.04    0.12 
  12   1  21    2.01    0.14 
  12  -1  19    0.30    0.07 
  12  -1  19    0.25    0.07 
 -12  -1 -19    0.26    0.06 
 -12   1 -19    0.30    0.06 
  12   1  19    0.17    0.06 
  12  -1  17    0.72    0.09 
  12  -1  17    0.80    0.09 
 -12  -1 -17    0.65    0.08 
 -12   1 -17    0.71    0.07 
  12   1  17    0.58    0.08 
  12  -1  15   -0.05    0.04 
 -12  -1 -15    0.02    0.04 
  12  -1  15    0.02    0.05 
 -12   1 -15    0.06    0.04 
  12   1  15    0.06    0.05 
  12  -1  13    0.82    0.08 
 -12  -1 -13    0.90    0.08 
  12  -1  13    0.72    0.08 
  12   1  13    0.83    0.09 
 -12   1 -13    0.85    0.08 
  12  -1  11    3.35    0.13 
  12  -1  11    3.23    0.14 
 -12  -1 -11    3.23    0.13 
 -12   1 -11    3.37    0.13 
  12  -1   9    0.06    0.04 
  12  -1   9    0.09    0.04 
 -12  -1  -9    0.03    0.03 
 -12   1  -9    0.05    0.03 
  12  -1   7    0.36    0.06 
 -12  -1  -7    0.27    0.05 
 -12   1  -7    0.26    0.05 
 -12  -1  -5    1.88    0.09 
  12  -1   5    1.91    0.11 
 -12   1  -5    1.92    0.09 
 -12  -1  -3    0.03    0.03 
 -12   1  -3   -0.04    0.03 
 -12  -1  -1    0.00    0.04 
 -12   1  -1   -0.04    0.03 
 -12  -1   1    0.01    0.03 
 -12   1   1    0.08    0.03 
 -12  -1   3    1.41    0.08 
 -12   1   3    1.34    0.08 
 -12  -1   5    2.52    0.10 
 -12   1   5    2.41    0.08 
 -12   1   5    2.34    0.10 
 -12  -1   7    0.95    0.07 
 -12  -1   7    0.87    0.07 
 -12   1   7    0.96    0.05 
 -12   1   7    0.96    0.07 
 -12  -1   9   10.82    0.23 
 -12  -1   9   10.65    0.23 
 -12   1   9   10.42    0.23 
 -12   1   9   10.54    0.21 
 -12  -1  11    6.84    0.17 
 -12  -1  11    6.43    0.18 
 -12   1  11    6.30    0.16 
 -12   1  11    6.42    0.18 
 -12  -1  13    0.61    0.07 
 -12  -1  13    0.57    0.06 
 -12   1  13    0.79    0.07 
 -12   1  13    0.70    0.07 
 -12  -1  15   10.62    0.26 
 -12  -1  15   11.13    0.24 
 -12   1  15   10.70    0.25 
 -12   1  15   10.73    0.24 
 -12  -1  17    0.97    0.09 
 -12  -1  17    0.94    0.08 
 -12   1  17    1.03    0.09 
 -12   1  17    0.74    0.07 
 -12  -1  19    2.55    0.14 
 -12  -1  19    2.75    0.12 
 -12   1  19    2.51    0.12 
 -12   1  19    2.76    0.14 
 -12  -1  21    6.94    0.19 
 -12  -1  21    6.76    0.23 
 -12   1  21    7.21    0.23 
 -12   1  21    6.79    0.20 
 -12  -1  23    0.47    0.08 
 -12  -1  23    0.55    0.07 
 -12   1  23    0.62    0.09 
 -12   1  23    0.89    0.09 
 -12  -1  25    5.39    0.22 
 -12   1  25    5.46    0.22 
 -12   1  25    5.52    0.19 
 -12  -1  27    1.75    0.16 
 -12   1  27    1.63    0.12 
 -12   1  27    1.75    0.15 
 -12  -1  29    2.16    0.17 
 -12   1  29    2.21    0.17 
 -12  -1  31    2.83    0.20 
 -12   1  31    3.30    0.20 
 -12  -1  33   -0.02    0.09 
 -12   1  33    0.06    0.09 
 -12  -1  35    4.30    0.25 
 -12   1  35    3.85    0.23 
  12  -2  32   10.22    0.36 
  12   2  32   10.45    0.38 
  12  -2  30   11.70    0.38 
  12   2  30   11.59    0.38 
  12  -2  28    0.42    0.10 
  12   2  28    0.51    0.10 
 -12  -2 -26    0.25    0.07 
  12  -2  26    0.38    0.09 
  12   2  26    0.31    0.09 
  12  -2  24   42.05    0.76 
 -12  -2 -24   40.93    0.72 
  12   2  24   43.05    0.78 
  12  -2  22    0.35    0.08 
 -12  -2 -22    0.32    0.07 
  12   2  22    0.37    0.08 
 -12  -2 -20    4.58    0.18 
  12  -2  20    4.11    0.18 
  12  -2  20    4.10    0.19 
  12   2  20    4.21    0.19 
 -12  -2 -18   95.36    1.39 
  12  -2  18   98.42    1.40 
  12  -2  18   97.38    1.39 
  12   2  18   98.42    1.43 
 -12   2 -18   96.46    1.34 
 -12  -2 -16   18.75    0.39 
  12  -2  16   18.77    0.39 
  12  -2  16   18.88    0.39 
 -12   2 -16   18.97    0.35 
  12  -2  14   33.61    0.58 
  12  -2  14   32.99    0.56 
 -12  -2 -14   32.41    0.56 
 -12   2 -14   32.77    0.53 
  12  -2  12   99.89    1.37 
  12  -2  12   98.81    1.40 
 -12  -2 -12   99.43    1.39 
 -12   2 -12   99.92    1.35 
  12  -2  10   79.24    1.16 
 -12  -2 -10   80.14    1.14
[truncated: 246,486 more chars]
