# Supplementary material
Source: MDPI journal article supplement (https://www.mdpi.com/2073-4352/8/5/221)
Supplement: s1 [file s1 › supplementary/supporting_info.pdf]

Supporting information

# Synthesis and Crystal Structures of Cadmium(II) Cyanide with *branched-butoxyethanol*

Takeshi Kawasaki and Takafumi Kitazawa

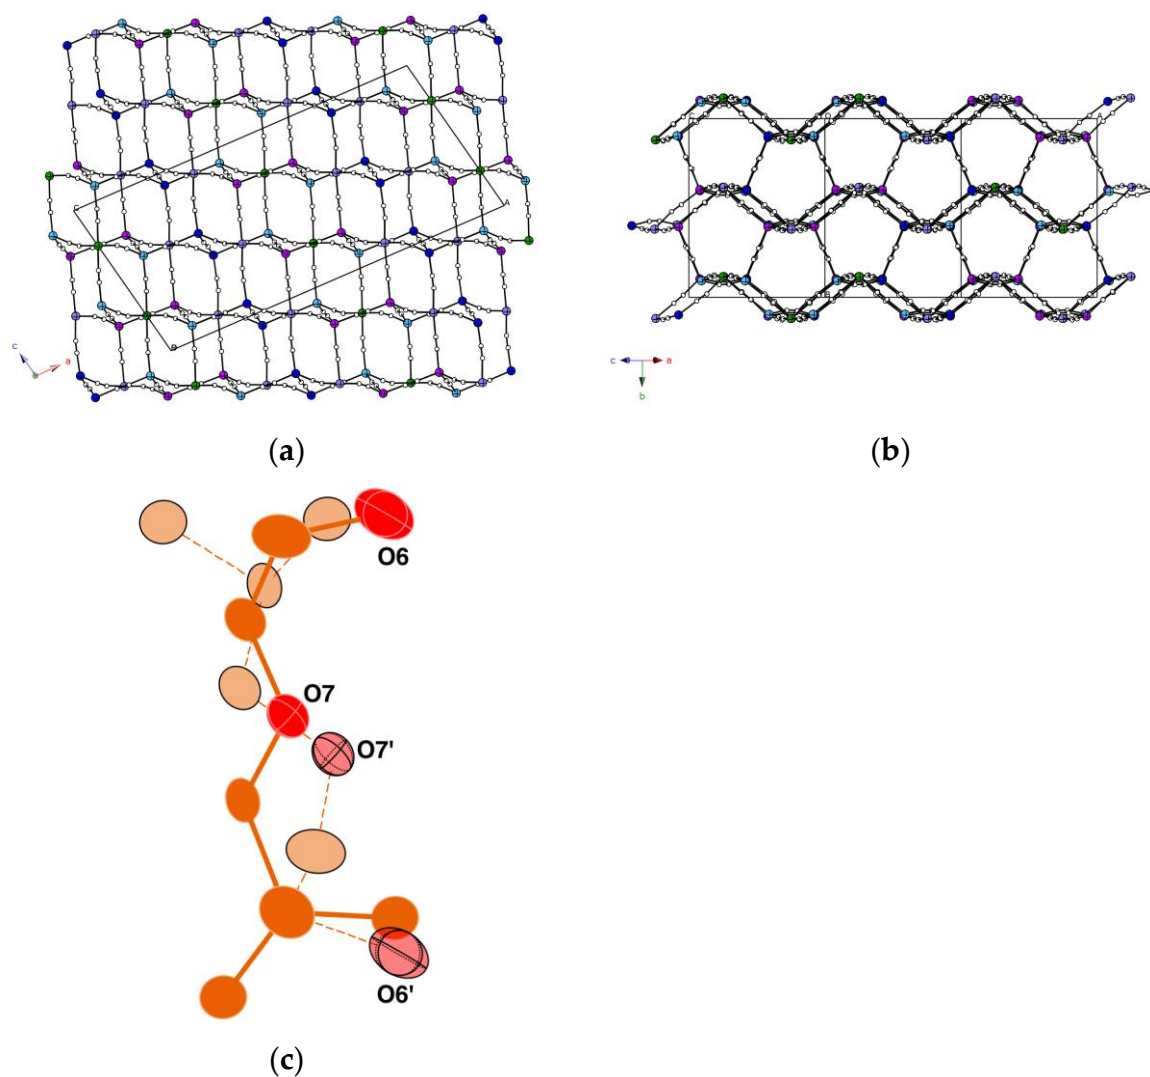

**Figure S1**  $\text{Cd}(\text{CN})_2$  network structure of **I**; (a) along the  $b$  axis, (b) along the (102) direction, and (c) iBucel guest molecule in  $\text{Cd}(\text{CN})_2$  framework of **I**.

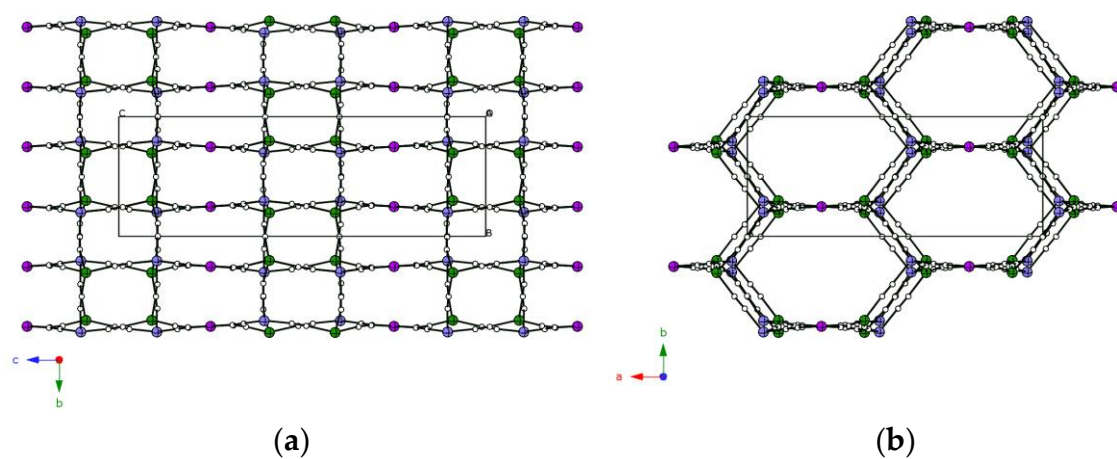

**Figure S2**  $\text{Cd}(\text{CN})_2$  network structure of **II**; (a) along the  $a$  axis and (b) along the  $c$  axis.

### Experiment for TGA measurement

All TGA measurements were performed by a SII EXSTAR TG/DTA 6200 (SII, Chiba, Japan). The samples were put in aluminum pan and the TGA data were measured from RT to 500 °C under nitrogen atmosphere and heating rate of 4 °C min<sup>-1</sup>.

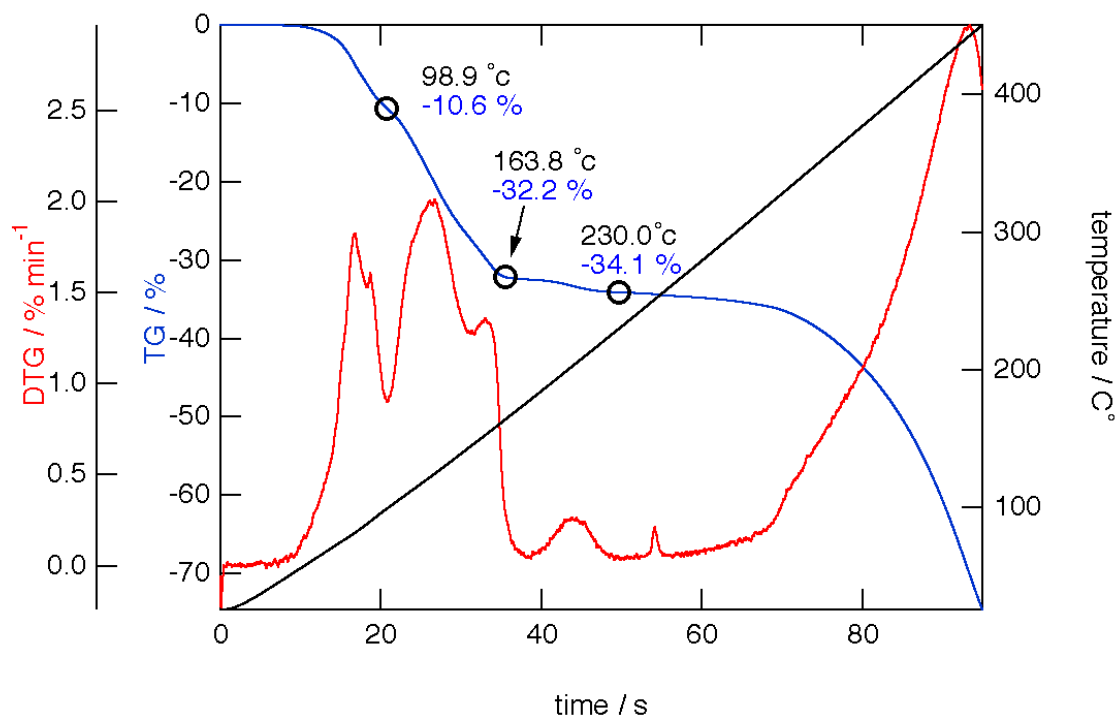

**Figure S3** TG and DTG plot of I. Calculated for the percentage by mass of all iBucel molecules and water molecules per I: 31.87 % and 1.62 %, respectively.

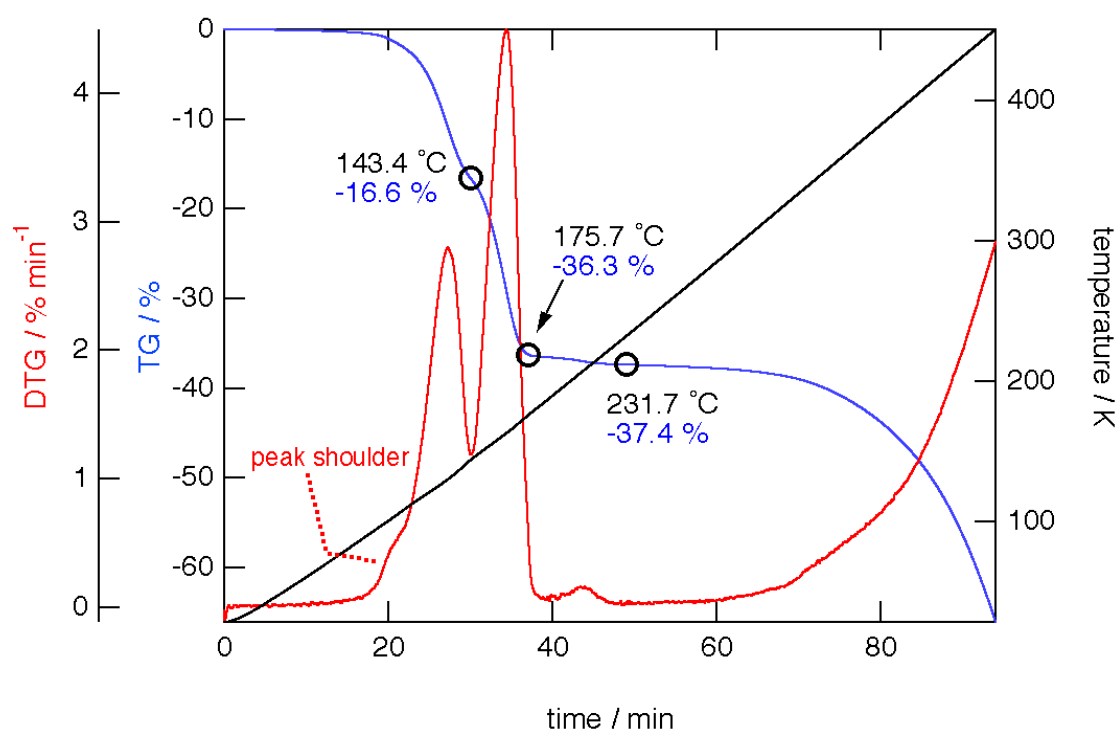

**Figure S4** TG and DTG plot of **II**. Calculated for the percentage by mass of 4 tBucel molecules and 1.06 water molecules per **II**: 35.97 % and 1.45 %, respectively.

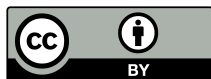

© 2018 by the authors. Submitted for possible open access publication under the terms and conditions of the Creative Commons Attribution (CC BY) license (<http://creativecommons.org/licenses/by/4.0/>).
